# Supplementary material
Source: PubMed Central journal article supplement (PMC3984882)

## Supporting Information

### Synthesis and Suzuki-Miyaura Cross-Coupling of Enantioenriched Secondary Potassium $\beta$ -Trifluoroboratoamides: Catalytic, Asymmetric Conjugate Addition of Bisboronic Acid and Tetrakis(dimethylamino)diboron to $\alpha,\beta$ -Unsaturated Carbonyl Compounds

Gary A. Molander,\* Steven R. Wisniewski, and Mona Hosseini-Sarvari<sup>†</sup>

Roy and Diana Vagelos Laboratories, Penn/Merck Laboratory for High-Throughput Experimentation,  
Department of Chemistry, University of Pennsylvania, 231 South 34th Street, Philadelphia, PA 19104-6323

<sup>†</sup> Current Address: Department of Chemistry, Shiraz University, Shiraz 71454, Iran

gmolandr@sas.upenn.edu

#### Contents:

|                                                                   |     |
|-------------------------------------------------------------------|-----|
| Information on High Throughput Experimentation.....               | S2  |
| Determination of Enantiomeric Ratios <i>via</i> SFC Analysis..... | S21 |
| NMR Spectra.....                                                  | S87 |

High Throughput Experimentation was performed at the Penn/Merck Center for High Throughput Experimentation at the University of Pennsylvania. The screens were analyzed by HPLC with addition of an internal standard. The areas for the internal standard (IS), starting amide (SM) and product (P or Prod) from each screen are shown in the tables below. The ratios calculated are pertinent only to that specific screen; the ratios from one screen should not be qualitatively compared to those from a different screen.

Reaction for all screens shown below:

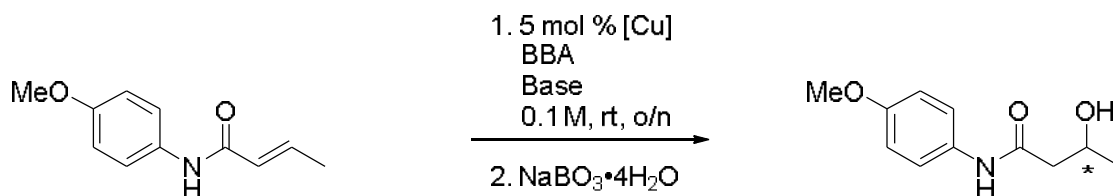

| Ligand Abbreviation | Ligand Name                                                                                                                             |
|---------------------|-----------------------------------------------------------------------------------------------------------------------------------------|
| Josiphos SL-J015-1  | ( <i>R</i> )-1-(( <i>S<sub>p</sub></i> )-2-[Di(2-furyl)phosphino]ferrocenyl)ethylidi(3,5-xylyl)phosphine                                |
| Josiphos SL-J505-1  | ( <i>R</i> )-1-(( <i>S<sub>p</sub></i> )-2-(Di- <i>tert</i> -butylphosphino)ferrocenyl)ethylbis(2-methylphenyl)phosphine                |
| Josiphos SL-J004-1  | ( <i>R</i> )-1-(( <i>S<sub>p</sub></i> )-2-(Dicyclohexylphosphino)ferrocenylethyl)diphenylphosphine                                     |
| Josiphos SL-J011-1  | ( <i>R</i> )-1-(( <i>S<sub>p</sub></i> )-2-[Bis(4-(trifluoromethyl)phenyl)phosphino]ferrocenyl)ethyl-di- <i>tert</i> -butylphosphine    |
| Josiphos SL-J009-1  | ( <i>R</i> )-1-(( <i>S<sub>p</sub></i> )-2-(Dicyclohexylphosphino)ferrocenyl)ethyl-di- <i>tert</i> -butylphosphine                      |
| Josiphos SL-J013-1  | ( <i>R</i> )-1-(( <i>S<sub>p</sub></i> )-2-[Bis(4-methoxy-3,5-dimethylphenyl)phosphino]ferrocenyl)ethyl-di- <i>tert</i> -butylphosphine |
| Josiphos SL-J005-1  | ( <i>R</i> )-1-(( <i>S<sub>p</sub></i> )-2-(Diphenylphosphino)ferrocenyl)ethyl-di(3,5-xylyl)phosphine                                   |
| Josiphos SL-J006-1  | ( <i>R</i> )-1-(( <i>S<sub>p</sub></i> )-2-[Bis(3,5-bis(trifluoromethyl)phenyl)phosphino]ferrocenyl)ethyldicyclohexylphosphine          |
| Josiphos SL-J007-1  | ( <i>R</i> )-1-(( <i>S<sub>p</sub></i> )-2-[Bis(4-methoxy-3,5-dimethylphenyl)phosphino]ferrocenyl)ethyldicyclohexylphosphine            |
| Josiphos SL-J002-1  | ( <i>R</i> )-1-(( <i>S<sub>p</sub></i> )-2-(Diphenylphosphino)ferrocenyl)ethyl-di- <i>tert</i> -butylphosphine                          |
| Josiphos SL-J003-1  | ( <i>R</i> )-1-(( <i>S<sub>p</sub></i> )-2-(Dicyclohexylphosphino)ferrocenyl)ethyldicyclohexylphosphine                                 |
| Josiphos SL-J008-1  | ( <i>R</i> )-1-(( <i>S<sub>p</sub></i> )-2-[Bis(3,5-bis(trifluoromethyl)phenyl)phosphino]ferrocenyl)ethyl-di(3,5-xylyl)phosphine        |
| Josiphos SL-J001-1  | ( <i>R</i> )-1-(( <i>S<sub>p</sub></i> )-2-(Diphenylphosphino)ferrocenyl)ethyldicyclohexylphosphine                                     |
| Josiphos SL-J502-1  | ( <i>R</i> )-1-(( <i>S<sub>p</sub></i> )-2-(Di- <i>tert</i> -butylphosphino)ferrocenyl)ethyldiphenylphosphine                           |
| SL-A116             | ( <i>R</i> )-(6,6'-Dimethoxybiphenyl-2,2'-diyl)bis(diisopropylphosphine)                                                                |
| SL-A101-1           | ( <i>R</i> )-(+)-(6,6'-Dimethoxybiphenyl-2,2'-diyl)bis(diphenylphosphine)                                                               |
| MeOBIPHEP SL-A104-1 | ( <i>R</i> )-(6,6'-Dimethoxybiphenyl-2,2'-diyl)bis[bis(3,4,5-trimethoxyphenyl)phosphine]                                                |
| MeOBIPHEP SL-A108-1 | ( <i>R</i> )-(6,6'-Dimethoxybiphenyl-2,2'-diyl)bis(di-2-furylphosphine)                                                                 |
| MeOBIPHEP SL-A107-1 | ( <i>R</i> )-(6,6'-Dimethoxybiphenyl-2,2'-diyl)bis[bis(3,5-diisopropyl-4-(dimethylamino)phenyl)phosphine]                               |
| MeOBIPHEP SL-A121-1 | ( <i>R</i> )-(6,6'-Dimethoxybiphenyl-2,2'-diyl)bis[bis(3,5-di- <i>tert</i> -butylphenyl)phosphine]                                      |
| MeOBIPHEP SL-A120-1 | ( <i>R</i> )-(6,6'-Dimethoxybiphenyl-2,2'-diyl)bis[bis(3,5-dimethylphenyl)phosphine]                                                    |
| MeOBIPHEP SL-A109-1 | ( <i>R</i> )-(6,6'-Dimethoxybiphenyl-2,2'-diyl)bis[bis(3,5-di- <i>tert</i> -butyl-4-methoxyphenyl)phosphine]                            |
| MeOBIPHEP SL-A102-1 | ( <i>R</i> )-(6,6'-Dimethoxybiphenyl-2,2'-diyl)bis[bis(4-methylphenyl)phosphine]                                                        |
| TaniaPhos T001      | ( <i>R<sub>p</sub></i> )-1-[( <i>R</i> )- $\alpha$ -(Dimethylamino)-2-(diphenylphosphino)benzyl]-2-diphenylphosphinoferrocene           |
| TaniaPhos T002      | ( <i>R<sub>p</sub></i> )-1-Dicyclohexylphosphino-2-[( <i>R</i> )- $\alpha$ -(dimethylamino)-2-(dicyclohexylphosphino)benzyl]ferrocene   |

|                       |                                                                                                                                                              |
|-----------------------|--------------------------------------------------------------------------------------------------------------------------------------------------------------|
| <b>WalPhos W001</b>   | ( <i>R</i> )-1-(( <i>R<sub>P</sub></i> )-2-[2-(Diphenylphosphino)phenyl]ferrocenyl)ethylbis[3,5-bis-(trifluoromethyl)phenyl]phosphine                        |
| <b>WalPhos W002</b>   | ( <i>R</i> )-1-(( <i>R<sub>P</sub></i> )-2-[2-(Diphenylphosphino)phenyl]ferrocenyl)ethyldiphenylphosphine                                                    |
| <b>MandyPhos M001</b> | ( <i>R<sub>P</sub></i> , <i>R<sub>P</sub></i> )-1,1'-Bis[( <i>S</i> )-α-(dimethylamino)benzyl]-2,2'-bis(diphenylphosphino)ferrocene                          |
| <b>MandyPhos M004</b> | ( <i>S<sub>P</sub></i> , <i>S<sub>P</sub></i> )-1,1'-Bis[bis(4-methoxy-3,5-dimethylphenyl)phosphino]-2,2'-bis[( <i>R</i> )-α-(dimethylamino)benzyl]ferrocene |
| <b>ROPPhos P001</b>   | (+)-1,2-Bis[(2 <i>S</i> ,5 <i>S</i> )-2,5-dimethyl-(3 <i>S</i> ,4 <i>S</i> )-3,4-dihydrophospholano]benzene bis(trifluoromethanesulfonate)salt               |
| <b>TSDPEN</b>         | (1 <i>S</i> ,2 <i>S</i> )-1,2-Bis(2-hydroxyphenyl)ethylenediamine                                                                                            |
| <b>L4019</b>          | ( <i>R</i> )-4,5-Dihydro-1,3-bis-([2.2]paracyclophan-4-yl)imidazolium chloride                                                                               |
| <b>P-PHOS</b>         | ( <i>R</i> )-(+)-2,2',6,6'-Tetramethoxy-4,4'-bis(diphenylphosphino)-3,3'-bipyridine                                                                          |
| <b>BDPP</b>           | (2 <i>S</i> ,4 <i>S</i> )-2,4-Bis(diphenylphosphino)pentane                                                                                                  |
| <b>T-BINAP</b>        | ( <i>R</i> )-(+)-2,2'-Bis(di- <i>p</i> -tolylphosphino)-1,1'-binaphthyl                                                                                      |
| <b>SI-PHOS</b>        | <i>N</i> -Dimethyl-[( <i>R</i> )-1,1'-spirobiindane-7,7'-diyl]phosphoramidite                                                                                |
| <b>SEGPPOS</b>        | ( <i>R</i> )-(+)-5,5'-Bis(diphenylphosphino)-4,4'-bi-1,3-benzodioxole                                                                                        |
| <b>QUINOXP</b>        | ( <i>R</i> , <i>R</i> )-(-)-2,3-Bis( <i>tert</i> -butylmethylphosphino)quinoxaline                                                                           |
| <b>H8BINAP</b>        | ( <i>R</i> )-(+)-2,2'-Bis(diphenylphosphino)-5,5',6,6',7,7',8,8'-octahydro-1,1'-binaphthyl                                                                   |
| <b>DMSEG</b>          | ( <i>R</i> )-(-)-5,5'-Bis(diphenylphosphino)-4,4'-bi-1,3-benzodioxole                                                                                        |
| <b>DTBMSEG</b>        | ( <i>R</i> )-(-)-5,5'-Bis[di(3,5-di- <i>tert</i> -butyl-4-methoxyphenyl)phosphino]-4,4'-bi-1,3-benzodioxole                                                  |
| <b>PYBOX</b>          | 2,6-Bis[(3 <i>aS</i> ,8 <i>aR</i> )-3 <i>a</i> ,8 <i>a</i> -dihydro-8 <i>H</i> -indeno[1,2- <i>d</i> ]oxazolin-2-yl]pyridine                                 |
| <b>DIOP</b>           | (+)-2,3- <i>O</i> -Isopropylidene-2,3-dihydroxy-1,4-bis(diphenylphosphino)butane                                                                             |
| <b>ISOBORNEOL</b>     | (2 <i>S</i> )-(-)-3- <i>exo</i> -(morpholino)isoborneol                                                                                                      |
| <b>L680192</b>        | 2,2-Bis((4 <i>S</i> )-(-)-4-isopropylloxazoline)propane                                                                                                      |
| <b>L4026</b>          | (2 <i>R</i> ,5 <i>R</i> )-1-[[{(2 <i>R</i> ,5 <i>R</i> )-2,5-Diphenylpyrrolidin-1-yl]methylene]-2,5-diphenylpyrrolidinium tetrafluoroborate                  |

Screen 1-A:

| <u>Ligand</u>       | <u>Copper Source</u> | <u>Base</u> | <u>Solvent</u> |
|---------------------|----------------------|-------------|----------------|
| Josiphos SL-J015-1  | CuCl                 | NaOtBu      | MeOH           |
| Josiphos SL-J505-1  | CuBr                 | KOtBu       | EtOH           |
| Josiphos SL-J004-1  | Cu(MeCN)4PF6         |             |                |
| Josiphos SL-J011-1  |                      |             |                |
| Josiphos SL-J009-1  |                      |             |                |
| Josiphos SL-J013-1  |                      |             |                |
| Josiphos SL-J005-1  |                      |             |                |
| Josiphos SL-J006-1  |                      |             |                |
| Josiphos SL-J007-1  |                      |             |                |
| Josiphos SL-J002-1  |                      |             |                |
| Josiphos SL-J003-1  |                      |             |                |
| Josiphos SL-J008-1  |                      |             |                |
| Josiphos SL-J001-1  |                      |             |                |
| Josiphos SL-J502-1  |                      |             |                |
| SL-A116             |                      |             |                |
| SL-A101-1           |                      |             |                |
| MeOBIPHEP SL-A104-1 |                      |             |                |
| MeOBIPHEP SL-A108-1 |                      |             |                |
| MeOBIPHEP SL-A107-1 |                      |             |                |

MeOBIPHEP SL-A121-1  
 MeOBIPHEP SL-A120-1  
 MeOBIPHEP SL-A109-1  
 MeOBIPHEP SL-A102-1

| <u>P/IS Ratio</u> | <u>Ligand</u> | <u>Copper Source</u>                  | <u>Base</u> | <u>Solvent</u> |
|-------------------|---------------|---------------------------------------|-------------|----------------|
| 1.745091811       | L1            | CuCl                                  | NaOtBu      | EtOH           |
| 0                 | L1            | CuBr                                  | NaOtBu      | EtOH           |
| 0.337964613       | L1            | Cu(MeCN) <sub>4</sub> PF <sub>6</sub> | NaOtBu      | EtOH           |
| 0                 | L1            | CuCl                                  | KOtBu       | EtOH           |
| 0.155500355       | L1            | CuBr                                  | KOtBu       | EtOH           |
| 0                 | L1            | Cu(MeCN) <sub>4</sub> PF <sub>6</sub> | KOtBu       | EtOH           |
| 0.107533599       | L1            | CuCl                                  | NaOtBu      | MeOH           |
| 0.109707526       | L1            | CuBr                                  | NaOtBu      | MeOH           |
| 0                 | L1            | Cu(MeCN) <sub>4</sub> PF <sub>6</sub> | NaOtBu      | MeOH           |
| 0.061048007       | L1            | CuCl                                  | KOtBu       | MeOH           |
| 1.995617413       | L1            | CuBr                                  | KOtBu       | MeOH           |
| 0                 | L1            | Cu(MeCN) <sub>4</sub> PF <sub>6</sub> | KOtBu       | MeOH           |
| 0.083161469       | L10           | CuCl                                  | NaOtBu      | EtOH           |
| 0                 | L10           | CuBr                                  | NaOtBu      | EtOH           |
| 0.164412354       | L10           | Cu(MeCN) <sub>4</sub> PF <sub>6</sub> | NaOtBu      | EtOH           |
| 0                 | L10           | CuCl                                  | KOtBu       | EtOH           |
| 0.144379817       | L10           | CuBr                                  | KOtBu       | EtOH           |
| 0.196589694       | L10           | Cu(MeCN) <sub>4</sub> PF <sub>6</sub> | KOtBu       | EtOH           |
| 0.046483704       | L10           | CuCl                                  | NaOtBu      | MeOH           |
| 0.065873773       | L10           | CuBr                                  | NaOtBu      | MeOH           |
| 0.367734152       | L10           | Cu(MeCN) <sub>4</sub> PF <sub>6</sub> | NaOtBu      | MeOH           |
| 2.336137167       | L10           | CuCl                                  | KOtBu       | MeOH           |
| 1.338718243       | L10           | CuBr                                  | KOtBu       | MeOH           |
| 0.201038673       | L10           | Cu(MeCN) <sub>4</sub> PF <sub>6</sub> | KOtBu       | MeOH           |
| 0.273209748       | L11           | CuCl                                  | NaOtBu      | EtOH           |
| 0.051605801       | L11           | CuBr                                  | NaOtBu      | EtOH           |
| 3.520951248       | L11           | Cu(MeCN) <sub>4</sub> PF <sub>6</sub> | NaOtBu      | EtOH           |
| 0                 | L11           | CuCl                                  | KOtBu       | EtOH           |
| 0.124819293       | L11           | CuBr                                  | KOtBu       | EtOH           |
| 0                 | L11           | Cu(MeCN) <sub>4</sub> PF <sub>6</sub> | KOtBu       | EtOH           |
| 0                 | L11           | CuCl                                  | NaOtBu      | MeOH           |
| 0                 | L11           | CuBr                                  | NaOtBu      | MeOH           |
| 0.085741643       | L11           | Cu(MeCN) <sub>4</sub> PF <sub>6</sub> | NaOtBu      | MeOH           |
| 0                 | L11           | CuCl                                  | KOtBu       | MeOH           |

|             |     |                                       |        |      |
|-------------|-----|---------------------------------------|--------|------|
| 1.929481838 | L11 | CuBr                                  | KOtBu  | MeOH |
| 0.050182023 | L11 | Cu(MeCN) <sub>4</sub> PF <sub>6</sub> | KOtBu  | MeOH |
| 0.160552479 | L12 | CuCl                                  | NaOtBu | EtOH |
| 0.04200212  | L12 | CuBr                                  | NaOtBu | EtOH |
| 0.096900881 | L12 | Cu(MeCN) <sub>4</sub> PF <sub>6</sub> | NaOtBu | EtOH |
| 0           | L12 | CuCl                                  | KOtBu  | EtOH |
| 0.059673275 | L12 | CuBr                                  | KOtBu  | EtOH |
| 0           | L12 | Cu(MeCN) <sub>4</sub> PF <sub>6</sub> | KOtBu  | EtOH |
| 0           | L12 | CuCl                                  | NaOtBu | MeOH |
| 0           | L12 | CuBr                                  | NaOtBu | MeOH |
| 0.070196311 | L12 | Cu(MeCN) <sub>4</sub> PF <sub>6</sub> | NaOtBu | MeOH |
| 1.830145995 | L12 | CuCl                                  | KOtBu  | MeOH |
| 0.230618396 | L12 | CuBr                                  | KOtBu  | MeOH |
| 0.726998267 | L12 | Cu(MeCN) <sub>4</sub> PF <sub>6</sub> | KOtBu  | MeOH |
| 1.316608573 | L13 | CuCl                                  | NaOtBu | EtOH |
| 1.246201682 | L13 | CuBr                                  | NaOtBu | EtOH |
| 0.82915111  | L13 | Cu(MeCN) <sub>4</sub> PF <sub>6</sub> | NaOtBu | EtOH |
| 0           | L13 | CuCl                                  | KOtBu  | EtOH |
| 0.298119603 | L13 | CuBr                                  | KOtBu  | EtOH |
| 1.757881461 | L13 | Cu(MeCN) <sub>4</sub> PF <sub>6</sub> | KOtBu  | EtOH |
| 1.799846181 | L13 | CuCl                                  | NaOtBu | MeOH |
| 0.884677533 | L13 | CuBr                                  | NaOtBu | MeOH |
| 0.06660501  | L13 | Cu(MeCN) <sub>4</sub> PF <sub>6</sub> | NaOtBu | MeOH |
| 0           | L13 | CuCl                                  | KOtBu  | MeOH |
| 0.47167042  | L13 | CuBr                                  | KOtBu  | MeOH |
| 2.087908852 | L13 | Cu(MeCN) <sub>4</sub> PF <sub>6</sub> | KOtBu  | MeOH |
| 0.151472212 | L14 | CuCl                                  | NaOtBu | EtOH |
| 0           | L14 | CuBr                                  | NaOtBu | EtOH |
| 0.102471871 | L14 | Cu(MeCN) <sub>4</sub> PF <sub>6</sub> | NaOtBu | EtOH |
| 0.510108891 | L14 | CuCl                                  | KOtBu  | EtOH |
| 0           | L14 | CuBr                                  | KOtBu  | EtOH |
| 0           | L14 | Cu(MeCN) <sub>4</sub> PF <sub>6</sub> | KOtBu  | EtOH |
| 1.059825237 | L14 | CuCl                                  | NaOtBu | MeOH |
| 0.190516905 | L14 | CuBr                                  | NaOtBu | MeOH |
| 0           | L14 | Cu(MeCN) <sub>4</sub> PF <sub>6</sub> | NaOtBu | MeOH |
| 1.879155407 | L14 | CuCl                                  | KOtBu  | MeOH |
| 0.613406603 | L14 | CuBr                                  | KOtBu  | MeOH |
| 0.348227784 | L14 | Cu(MeCN) <sub>4</sub> PF <sub>6</sub> | KOtBu  | MeOH |
| 0.321244657 | L15 | CuCl                                  | NaOtBu | EtOH |
| 1.544644927 | L15 | CuBr                                  | NaOtBu | EtOH |

|             |     |                                       |        |      |
|-------------|-----|---------------------------------------|--------|------|
| 0.174805259 | L15 | Cu(MeCN) <sub>4</sub> PF <sub>6</sub> | NaOtBu | EtOH |
| 0           | L15 | CuCl                                  | KOtBu  | EtOH |
| 0           | L15 | CuBr                                  | KOtBu  | EtOH |
| 0.155263062 | L15 | Cu(MeCN) <sub>4</sub> PF <sub>6</sub> | KOtBu  | EtOH |
| 0           | L15 | CuCl                                  | NaOtBu | MeOH |
| 0.049938388 | L15 | CuBr                                  | NaOtBu | MeOH |
| 0.965519976 | L15 | Cu(MeCN) <sub>4</sub> PF <sub>6</sub> | NaOtBu | MeOH |
| 1.330204258 | L15 | CuCl                                  | KOtBu  | MeOH |
| 0           | L15 | CuBr                                  | KOtBu  | MeOH |
| 0           | L15 | Cu(MeCN) <sub>4</sub> PF <sub>6</sub> | KOtBu  | MeOH |
| 0           | L16 | CuCl                                  | NaOtBu | EtOH |
| 0.262764872 | L16 | CuBr                                  | NaOtBu | EtOH |
| 0           | L16 | Cu(MeCN) <sub>4</sub> PF <sub>6</sub> | NaOtBu | EtOH |
| 0           | L16 | CuCl                                  | KOtBu  | EtOH |
| 0           | L16 | CuBr                                  | KOtBu  | EtOH |
| 0           | L16 | Cu(MeCN) <sub>4</sub> PF <sub>6</sub> | KOtBu  | EtOH |
| 0.382338642 | L16 | CuCl                                  | NaOtBu | MeOH |
| 0.049470939 | L16 | CuBr                                  | NaOtBu | MeOH |
| 0           | L16 | Cu(MeCN) <sub>4</sub> PF <sub>6</sub> | NaOtBu | MeOH |
| 0.083904209 | L16 | CuCl                                  | KOtBu  | MeOH |
| 0.878142218 | L16 | CuBr                                  | KOtBu  | MeOH |
| 1.629710127 | L16 | Cu(MeCN) <sub>4</sub> PF <sub>6</sub> | KOtBu  | MeOH |
| 1.3715489   | L17 | CuCl                                  | NaOtBu | EtOH |
| 0           | L17 | CuBr                                  | NaOtBu | EtOH |
| 0.124231347 | L17 | Cu(MeCN) <sub>4</sub> PF <sub>6</sub> | NaOtBu | EtOH |
| 0.052634961 | L17 | CuCl                                  | KOtBu  | EtOH |
| 0           | L17 | CuBr                                  | KOtBu  | EtOH |
| 0           | L17 | Cu(MeCN) <sub>4</sub> PF <sub>6</sub> | KOtBu  | EtOH |
| 0           | L17 | CuCl                                  | NaOtBu | MeOH |
| 0.743155791 | L17 | CuBr                                  | NaOtBu | MeOH |
| 0.228429479 | L17 | Cu(MeCN) <sub>4</sub> PF <sub>6</sub> | NaOtBu | MeOH |
| 0           | L17 | CuCl                                  | KOtBu  | MeOH |
| 1.338703898 | L17 | CuBr                                  | KOtBu  | MeOH |
| 0           | L17 | Cu(MeCN) <sub>4</sub> PF <sub>6</sub> | KOtBu  | MeOH |
| 0           | L18 | CuCl                                  | NaOtBu | EtOH |
| 0.807421196 | L18 | CuBr                                  | NaOtBu | EtOH |
| 0.199888869 | L18 | Cu(MeCN) <sub>4</sub> PF <sub>6</sub> | NaOtBu | EtOH |
| 0           | L18 | CuCl                                  | KOtBu  | EtOH |
| 0           | L18 | CuBr                                  | KOtBu  | EtOH |
| 0           | L18 | Cu(MeCN) <sub>4</sub> PF <sub>6</sub> | KOtBu  | EtOH |

|             |     |                                       |        |      |
|-------------|-----|---------------------------------------|--------|------|
| 0.514100467 | L18 | 6<br>CuCl                             | NaOtBu | MeOH |
| 0           | L18 | CuBr                                  | NaOtBu | MeOH |
| 0           | L18 | Cu(MeCN) <sub>4</sub> PF <sub>6</sub> | NaOtBu | MeOH |
| 1.000322505 | L18 | CuCl                                  | KOtBu  | MeOH |
| 0.816880568 | L18 | CuBr                                  | KOtBu  | MeOH |
| 0.057290157 | L18 | Cu(MeCN) <sub>4</sub> PF <sub>6</sub> | KOtBu  | MeOH |
| 1.735721958 | L19 | CuCl                                  | NaOtBu | EtOH |
| 1.107318861 | L19 | CuBr                                  | NaOtBu | EtOH |
| 0.570899065 | L19 | Cu(MeCN) <sub>4</sub> PF <sub>6</sub> | NaOtBu | EtOH |
| 2.285712178 | L19 | CuCl                                  | KOtBu  | EtOH |
| 0.053279765 | L19 | CuBr                                  | KOtBu  | EtOH |
| 0.252268087 | L19 | Cu(MeCN) <sub>4</sub> PF <sub>6</sub> | KOtBu  | EtOH |
| 0           | L19 | CuCl                                  | NaOtBu | MeOH |
| 2.89813542  | L19 | CuBr                                  | NaOtBu | MeOH |
| 0.076541865 | L19 | Cu(MeCN) <sub>4</sub> PF <sub>6</sub> | NaOtBu | MeOH |
| 0.142014049 | L19 | CuCl                                  | KOtBu  | MeOH |
| 0           | L19 | CuBr                                  | KOtBu  | MeOH |
| 1.023691077 | L19 | Cu(MeCN) <sub>4</sub> PF <sub>6</sub> | KOtBu  | MeOH |
| 0           | L2  | CuCl                                  | NaOtBu | EtOH |
| 0.139997523 | L2  | CuBr                                  | NaOtBu | EtOH |
| 1.465535728 | L2  | Cu(MeCN) <sub>4</sub> PF <sub>6</sub> | NaOtBu | EtOH |
| 1.45804815  | L2  | CuCl                                  | KOtBu  | EtOH |
| 0.692065081 | L2  | CuBr                                  | KOtBu  | EtOH |
| 0           | L2  | Cu(MeCN) <sub>4</sub> PF <sub>6</sub> | KOtBu  | EtOH |
| 1.09508593  | L2  | CuCl                                  | NaOtBu | MeOH |
| 0           | L2  | CuBr                                  | NaOtBu | MeOH |
| 0.045644684 | L2  | Cu(MeCN) <sub>4</sub> PF <sub>6</sub> | NaOtBu | MeOH |
| 0.938201625 | L2  | CuCl                                  | KOtBu  | MeOH |
| 0.093819904 | L2  | CuBr                                  | KOtBu  | MeOH |
| 1.42241303  | L2  | Cu(MeCN) <sub>4</sub> PF <sub>6</sub> | KOtBu  | MeOH |
| 2.07758674  | L20 | CuCl                                  | NaOtBu | EtOH |
| 0.441378799 | L20 | CuBr                                  | NaOtBu | EtOH |
| 0.127771457 | L20 | Cu(MeCN) <sub>4</sub> PF <sub>6</sub> | NaOtBu | EtOH |
| 0.077283969 | L20 | CuCl                                  | KOtBu  | EtOH |
| 0           | L20 | CuBr                                  | KOtBu  | EtOH |
| 0           | L20 | Cu(MeCN) <sub>4</sub> PF <sub>6</sub> | KOtBu  | EtOH |
| 0.160402369 | L20 | CuCl                                  | NaOtBu | MeOH |
| 0.21191701  | L20 | CuBr                                  | NaOtBu | MeOH |
| 0           | L20 | Cu(MeCN) <sub>4</sub> PF <sub>6</sub> | NaOtBu | MeOH |

|             |     |                                       |        |      |
|-------------|-----|---------------------------------------|--------|------|
| 0.20882906  | L20 | CuCl                                  | KOtBu  | MeOH |
| 2.773303734 | L20 | CuBr                                  | KOtBu  | MeOH |
| 0           | L20 | Cu(MeCN) <sub>4</sub> PF <sub>6</sub> | KOtBu  | MeOH |
| 0.949235959 | L21 | CuCl                                  | NaOtBu | EtOH |
| 0           | L21 | CuBr                                  | NaOtBu | EtOH |
| 0.061306043 | L21 | Cu(MeCN) <sub>4</sub> PF <sub>6</sub> | NaOtBu | EtOH |
| 0.501682201 | L21 | CuCl                                  | KOtBu  | EtOH |
| 0.154255242 | L21 | CuBr                                  | KOtBu  | EtOH |
| 0           | L21 | Cu(MeCN) <sub>4</sub> PF <sub>6</sub> | KOtBu  | EtOH |
| 0           | L21 | CuCl                                  | NaOtBu | MeOH |
| 0.10387084  | L21 | CuBr                                  | NaOtBu | MeOH |
| 0           | L21 | Cu(MeCN) <sub>4</sub> PF <sub>6</sub> | NaOtBu | MeOH |
| 0.210518441 | L21 | CuCl                                  | KOtBu  | MeOH |
| 3.424212771 | L21 | CuBr                                  | KOtBu  | MeOH |
| 0.306166699 | L21 | Cu(MeCN) <sub>4</sub> PF <sub>6</sub> | KOtBu  | MeOH |
| 0.470384963 | L22 | CuCl                                  | NaOtBu | EtOH |
| 0.171546171 | L22 | CuBr                                  | NaOtBu | EtOH |
| 0.550331866 | L22 | Cu(MeCN) <sub>4</sub> PF <sub>6</sub> | NaOtBu | EtOH |
| 0.075043489 | L22 | CuCl                                  | KOtBu  | EtOH |
| 0.732649501 | L22 | CuBr                                  | KOtBu  | EtOH |
| 0           | L22 | Cu(MeCN) <sub>4</sub> PF <sub>6</sub> | KOtBu  | EtOH |
| 1.886274864 | L22 | CuCl                                  | NaOtBu | MeOH |
| 0.267230399 | L22 | CuBr                                  | NaOtBu | MeOH |
| 0.275176826 | L22 | Cu(MeCN) <sub>4</sub> PF <sub>6</sub> | NaOtBu | MeOH |
| 0           | L22 | CuCl                                  | KOtBu  | MeOH |
| 2.753119032 | L22 | CuBr                                  | KOtBu  | MeOH |
| 0.255426446 | L22 | Cu(MeCN) <sub>4</sub> PF <sub>6</sub> | KOtBu  | MeOH |
| 0.069084401 | L23 | CuCl                                  | NaOtBu | EtOH |
| 1.835529474 | L23 | CuBr                                  | NaOtBu | EtOH |
| 0           | L23 | Cu(MeCN) <sub>4</sub> PF <sub>6</sub> | NaOtBu | EtOH |
| 0.350472819 | L23 | CuCl                                  | KOtBu  | EtOH |
| 0.36328276  | L23 | CuBr                                  | KOtBu  | EtOH |
| 0           | L23 | Cu(MeCN) <sub>4</sub> PF <sub>6</sub> | KOtBu  | EtOH |
| 0           | L23 | CuCl                                  | NaOtBu | MeOH |
| 0           | L23 | CuBr                                  | NaOtBu | MeOH |
| 0.103488147 | L23 | Cu(MeCN) <sub>4</sub> PF <sub>6</sub> | NaOtBu | MeOH |
| 0.559266474 | L23 | CuCl                                  | KOtBu  | MeOH |
| 5.181595724 | L23 | CuBr                                  | KOtBu  | MeOH |
| 0.329516461 | L23 | Cu(MeCN) <sub>4</sub> PF <sub>6</sub> | KOtBu  | MeOH |
| 0           | L3  | CuCl                                  | NaOtBu | EtOH |



|             |    |                                       |        |      |
|-------------|----|---------------------------------------|--------|------|
| 0.311874579 | L3 | CuBr                                  | NaOtBu | EtOH |
| 0.303045857 | L3 | Cu(MeCN) <sub>4</sub> PF <sub>6</sub> | NaOtBu | EtOH |
| 0.168861717 | L3 | CuCl                                  | KOtBu  | EtOH |
| 0.520745142 | L3 | CuBr                                  | KOtBu  | EtOH |
| 0.118642626 | L3 | Cu(MeCN) <sub>4</sub> PF <sub>6</sub> | KOtBu  | EtOH |
| 0.365969948 | L3 | CuCl                                  | NaOtBu | MeOH |
| 1.067762148 | L3 | CuBr                                  | NaOtBu | MeOH |
| 0           | L3 | Cu(MeCN) <sub>4</sub> PF <sub>6</sub> | NaOtBu | MeOH |
| 1.975325234 | L3 | CuCl                                  | KOtBu  | MeOH |
| 0.683870223 | L3 | CuBr                                  | KOtBu  | MeOH |
| 0.37159605  | L3 | Cu(MeCN) <sub>4</sub> PF <sub>6</sub> | KOtBu  | MeOH |
| 0.457042519 | L4 | CuCl                                  | NaOtBu | EtOH |
| 0.146497034 | L4 | CuBr                                  | NaOtBu | EtOH |
| 1.721778805 | L4 | Cu(MeCN) <sub>4</sub> PF <sub>6</sub> | NaOtBu | EtOH |
| 0           | L4 | CuCl                                  | KOtBu  | EtOH |
| 0           | L4 | CuBr                                  | KOtBu  | EtOH |
| 0           | L4 | Cu(MeCN) <sub>4</sub> PF <sub>6</sub> | KOtBu  | EtOH |
| 0.181789649 | L4 | CuCl                                  | NaOtBu | MeOH |
| 0           | L4 | CuBr                                  | NaOtBu | MeOH |
| 0.306460091 | L4 | Cu(MeCN) <sub>4</sub> PF <sub>6</sub> | NaOtBu | MeOH |
| 0           | L4 | CuCl                                  | KOtBu  | MeOH |
| 0           | L4 | CuBr                                  | KOtBu  | MeOH |
| 1.473506325 | L4 | Cu(MeCN) <sub>4</sub> PF <sub>6</sub> | KOtBu  | MeOH |
| 0           | L5 | CuCl                                  | NaOtBu | EtOH |
| 0           | L5 | CuBr                                  | NaOtBu | EtOH |
| 0.191630487 | L5 | Cu(MeCN) <sub>4</sub> PF <sub>6</sub> | NaOtBu | EtOH |
| 0           | L5 | CuCl                                  | KOtBu  | EtOH |
| 0.300059756 | L5 | CuBr                                  | KOtBu  | EtOH |
| 0           | L5 | Cu(MeCN) <sub>4</sub> PF <sub>6</sub> | KOtBu  | EtOH |
| 0           | L5 | CuCl                                  | NaOtBu | MeOH |
| 0.244382839 | L5 | CuBr                                  | NaOtBu | MeOH |
| 0.066735711 | L5 | Cu(MeCN) <sub>4</sub> PF <sub>6</sub> | NaOtBu | MeOH |
| 0.06019048  | L5 | CuCl                                  | KOtBu  | MeOH |
| 0.465653814 | L5 | CuBr                                  | KOtBu  | MeOH |
| 2.180496832 | L5 | Cu(MeCN) <sub>4</sub> PF <sub>6</sub> | KOtBu  | MeOH |
| 0.100105754 | L6 | CuCl                                  | NaOtBu | EtOH |
| 0           | L6 | CuBr                                  | NaOtBu | EtOH |
| 0.150044972 | L6 | Cu(MeCN) <sub>4</sub> PF <sub>6</sub> | NaOtBu | EtOH |
| 0           | L6 | CuCl                                  | KOtBu  | EtOH |
| 0           | L6 | CuBr                                  | KOtBu  | EtOH |

|             |    |                                       |        |      |
|-------------|----|---------------------------------------|--------|------|
| 0           | L6 | Cu(MeCN) <sub>4</sub> PF <sub>6</sub> | KOtBu  | EtOH |
| 0           | L6 | CuCl                                  | NaOtBu | MeOH |
| 0.09181772  | L6 | CuBr                                  | NaOtBu | MeOH |
| 0.246864956 | L6 | Cu(MeCN) <sub>4</sub> PF <sub>6</sub> | NaOtBu | MeOH |
| 1.458392185 | L6 | CuCl                                  | KOtBu  | MeOH |
| 0           | L6 | CuBr                                  | KOtBu  | MeOH |
| 0           | L6 | Cu(MeCN) <sub>4</sub> PF <sub>6</sub> | KOtBu  | MeOH |
| 0           | L7 | CuCl                                  | NaOtBu | EtOH |
| 0           | L7 | CuBr                                  | NaOtBu | EtOH |
| 0.224385837 | L7 | Cu(MeCN) <sub>4</sub> PF <sub>6</sub> | NaOtBu | EtOH |
| 0           | L7 | CuCl                                  | KOtBu  | EtOH |
| 0           | L7 | CuBr                                  | KOtBu  | EtOH |
| 0           | L7 | Cu(MeCN) <sub>4</sub> PF <sub>6</sub> | KOtBu  | EtOH |
| 0           | L7 | CuCl                                  | NaOtBu | MeOH |
| 0.150342976 | L7 | CuBr                                  | NaOtBu | MeOH |
| 0           | L7 | Cu(MeCN) <sub>4</sub> PF <sub>6</sub> | NaOtBu | MeOH |
| 2.288570962 | L7 | CuCl                                  | KOtBu  | MeOH |
| 0.269261823 | L7 | CuBr                                  | KOtBu  | MeOH |
| 1.650301589 | L7 | Cu(MeCN) <sub>4</sub> PF <sub>6</sub> | KOtBu  | MeOH |
| 0.55845394  | L8 | CuCl                                  | NaOtBu | EtOH |
| 2.175922874 | L8 | CuBr                                  | NaOtBu | EtOH |
| 2.114322716 | L8 | Cu(MeCN) <sub>4</sub> PF <sub>6</sub> | NaOtBu | EtOH |
| 0.287163766 | L8 | CuCl                                  | KOtBu  | EtOH |
| 1.355478301 | L8 | CuBr                                  | KOtBu  | EtOH |
| 0           | L8 | Cu(MeCN) <sub>4</sub> PF <sub>6</sub> | KOtBu  | EtOH |
| 0           | L8 | CuCl                                  | NaOtBu | MeOH |
| 0           | L8 | CuBr                                  | NaOtBu | MeOH |
| 0.283841179 | L8 | Cu(MeCN) <sub>4</sub> PF <sub>6</sub> | NaOtBu | MeOH |
| 2.248520991 | L8 | CuCl                                  | KOtBu  | MeOH |
| 0.167046941 | L8 | CuBr                                  | KOtBu  | MeOH |
| 0.156682058 | L8 | Cu(MeCN) <sub>4</sub> PF <sub>6</sub> | KOtBu  | MeOH |
| 0.049938447 | L9 | CuCl                                  | NaOtBu | EtOH |
| 0           | L9 | CuBr                                  | NaOtBu | EtOH |
| 1.17380282  | L9 | Cu(MeCN) <sub>4</sub> PF <sub>6</sub> | NaOtBu | EtOH |
| 0           | L9 | CuCl                                  | KOtBu  | EtOH |
| 0.525420857 | L9 | CuBr                                  | KOtBu  | EtOH |
| 0.066737141 | L9 | Cu(MeCN) <sub>4</sub> PF <sub>6</sub> | KOtBu  | EtOH |
| 0           | L9 | CuCl                                  | NaOtBu | MeOH |
| 0           | L9 | CuBr                                  | NaOtBu | MeOH |
| 1.0781532   | L9 | Cu(MeCN) <sub>4</sub> PF <sub>6</sub> | NaOtBu | MeOH |

|             |    |                                       |       |      |
|-------------|----|---------------------------------------|-------|------|
| 0           | L9 | 6<br>CuCl                             | KOtBu | MeOH |
| 0.560707167 | L9 | CuBr                                  | KOtBu | MeOH |
| 1.470648661 | L9 | Cu(MeCN) <sub>4</sub> PF <sub>6</sub> | KOtBu | MeOH |

- L1 Josiphos SL-J015-1
- L2 Josiphos SL-J505-1
- L3 Josiphos SL-J004-1
- L4 Josiphos SL-J011-1
- L5 Josiphos SL-J009-1
- L6 Josiphos SL-J013-1
- L7 Josiphos SL-J005-1
- L8 Josiphos SL-J006-1
- L9 Josiphos SL-J007-1
- L10 Josiphos SL-J002-1
- L11 Josiphos SL-J003-1
- L12 Josiphos SL-J008-1
- L13 Josiphos SL-J001-1
- L14 Josiphos SL-J502-1
- L15 SL-A116
- L16 SL-A101-1
- L17 MeOBIPHEP SL-A104-1
- L18 MeoBIPHEP SL-A108-1
- L19 MeoBIPHEP SL-A107-1
- L20 MeOBIPHEP SL-A121-1
- L21 MeOBIPHEP SL-A120-1
- L22 MeOBIPHEP SL-A109-1
- L23 MeOBIPHEP SL-A102-1

Screen 1-B:

| <u>Lig</u>     | <u>Copper Source</u>                  | <u>Solvent</u> | <u>Base</u> |
|----------------|---------------------------------------|----------------|-------------|
| Josiphos J001  | CuCl                                  | EtOH           | NaOtBu      |
| Josiphos J002  | Cu(MeCN) <sub>4</sub> PF <sub>6</sub> | meOH           | KOtBu       |
| Josiphos J003  |                                       |                | NaOMe       |
| Josiphos J005  |                                       |                |             |
| TaniaPhos T001 |                                       |                |             |
| TaniaPhos T002 |                                       |                |             |
| WalPhos W001   |                                       |                |             |
| WalPhos W002   |                                       |                |             |
| MandyPhos M001 |                                       |                |             |
| MandyPhos M004 |                                       |                |             |
| ROPhos P001    |                                       |                |             |
| SL-A101        |                                       |                |             |
| SL-A109        |                                       |                |             |

1,2-Bis[(2*S*,5*S*)-2,5-  
diisopropylphospholano]ethane

(*S,S*)-*i*-Pr-DUPHOS

| <u>P/IS</u> | <u>Lig</u> | <u>Copper Source</u> | <u>Solvent</u> | <u>Base</u> |
|-------------|------------|----------------------|----------------|-------------|
| 0.397638    | J001       | CuCl                 | EtOH           | NaOtBu      |
| 0.65703     | J001       | CuCl                 | EtOH           | KOtBu       |
| 0.19401     | J001       | CuCl                 | EtOH           | NaOMe       |
| 0.678478    | J001       | CuCl                 | MeOH           | NaOtBu      |
| 0.036458    | J001       | CuCl                 | MeOH           | KOtBu       |
| 0.036891    | J001       | CuCl                 | MeOH           | NaOMe       |
| 0.036939    | J001       | Cu(MeCN)4PF6         | EtOH           | NaOtBu      |
| 1.242063    | J001       | Cu(MeCN)4PF6         | EtOH           | KOtBu       |
| 0.545932    | J001       | Cu(MeCN)4PF6         | EtOH           | NaOMe       |
| 1.56168     | J001       | Cu(MeCN)4PF6         | MeOH           | NaOtBu      |
| 0.720627    | J001       | Cu(MeCN)4PF6         | MeOH           | KOtBu       |
| 0.510996    | J001       | Cu(MeCN)4PF6         | MeOH           | NaOMe       |
| 0.533854    | J002       | CuCl                 | EtOH           | NaOtBu      |
| 0.120051    | J002       | CuCl                 | EtOH           | KOtBu       |
| 0.236641    | J002       | CuCl                 | EtOH           | NaOMe       |
| 0.091954    | J002       | CuCl                 | MeOH           | NaOtBu      |
| 0.015385    | J002       | CuCl                 | MeOH           | KOtBu       |
| 0.020645    | J002       | CuCl                 | MeOH           | NaOMe       |
| 0.015544    | J002       | Cu(MeCN)4PF6         | EtOH           | NaOtBu      |
| 0.013141    | J002       | Cu(MeCN)4PF6         | EtOH           | KOtBu       |
| 0.01039     | J002       | Cu(MeCN)4PF6         | EtOH           | NaOMe       |
| 0.088918    | J002       | Cu(MeCN)4PF6         | MeOH           | NaOtBu      |
| 0.010363    | J002       | Cu(MeCN)4PF6         | MeOH           | KOtBu       |
| 0.007762    | J002       | Cu(MeCN)4PF6         | MeOH           | NaOMe       |
| 0.974684    | J003       | CuCl                 | EtOH           | NaOtBu      |
| 0.010243    | J003       | CuCl                 | EtOH           | KOtBu       |
| 1.722721    | J003       | CuCl                 | EtOH           | NaOMe       |
| 0.007874    | J003       | CuCl                 | MeOH           | NaOtBu      |
| 2.107868    | J003       | CuCl                 | MeOH           | KOtBu       |
| 1.650064    | J003       | CuCl                 | MeOH           | NaOMe       |
| 1.743295    | J003       | Cu(MeCN)4PF6         | EtOH           | NaOtBu      |
| 1.971903    | J003       | Cu(MeCN)4PF6         | EtOH           | KOtBu       |
| 1.933758    | J003       | Cu(MeCN)4PF6         | EtOH           | NaOMe       |
| 2.734584    | J003       | Cu(MeCN)4PF6         | MeOH           | NaOtBu      |
| 1.025575    | J003       | Cu(MeCN)4PF6         | MeOH           | KOtBu       |
| 2.621967    | J003       | Cu(MeCN)4PF6         | MeOH           | NaOMe       |

|          |      |              |      |        |
|----------|------|--------------|------|--------|
| 0.918987 | J005 | CuCl         | EtOH | NaOtBu |
| 0.455808 | J005 | CuCl         | EtOH | KOtBu  |
| 1.069913 | J005 | CuCl         | EtOH | NaOMe  |
| 2.07314  | J005 | CuCl         | MeOH | NaOtBu |
| 1.692884 | J005 | CuCl         | MeOH | KOtBu  |
| 0.587719 | J005 | CuCl         | MeOH | NaOMe  |
| 0.565    | J005 | Cu(MeCN)4PF6 | EtOH | NaOtBu |
| 1.195214 | J005 | Cu(MeCN)4PF6 | EtOH | KOtBu  |
| 1.220681 | J005 | Cu(MeCN)4PF6 | EtOH | NaOMe  |
| 2.086902 | J005 | Cu(MeCN)4PF6 | MeOH | NaOtBu |
| 2.217391 | J005 | Cu(MeCN)4PF6 | MeOH | KOtBu  |
| 2.171679 | J005 | Cu(MeCN)4PF6 | MeOH | NaOMe  |
| 0.6      | T001 | CuCl         | EtOH | NaOtBu |
| 0.167506 | T001 | CuCl         | EtOH | KOtBu  |
| 0.24625  | T001 | CuCl         | EtOH | NaOMe  |
| 0.868586 | T001 | CuCl         | MeOH | NaOtBu |
| 0.134085 | T001 | CuCl         | MeOH | KOtBu  |
| 0.09637  | T001 | CuCl         | MeOH | NaOMe  |
| 0.174505 | T001 | Cu(MeCN)4PF6 | EtOH | NaOtBu |
| 0.192308 | T001 | Cu(MeCN)4PF6 | EtOH | KOtBu  |
| 0.217337 | T001 | Cu(MeCN)4PF6 | EtOH | NaOMe  |
| 0.059776 | T001 | Cu(MeCN)4PF6 | MeOH | NaOtBu |
| 0.04703  | T001 | Cu(MeCN)4PF6 | MeOH | KOtBu  |
| 0.05625  | T001 | Cu(MeCN)4PF6 | MeOH | NaOMe  |
| 0.269279 | T002 | CuCl         | EtOH | NaOtBu |
| 0.059418 | T002 | CuCl         | EtOH | KOtBu  |
| 0.727848 | T002 | CuCl         | EtOH | NaOMe  |
| 2.653652 | T002 | CuCl         | MeOH | NaOtBu |
| 0.086683 | T002 | CuCl         | MeOH | KOtBu  |
| 0.084263 | T002 | CuCl         | MeOH | NaOMe  |
| 0.083541 | T002 | Cu(MeCN)4PF6 | EtOH | NaOtBu |
| 1.185232 | T002 | Cu(MeCN)4PF6 | EtOH | KOtBu  |
| 0.567127 | T002 | Cu(MeCN)4PF6 | EtOH | NaOMe  |
| 1.88642  | T002 | Cu(MeCN)4PF6 | MeOH | NaOtBu |
| 2.553191 | T002 | Cu(MeCN)4PF6 | MeOH | KOtBu  |
| 2.80917  | T002 | Cu(MeCN)4PF6 | MeOH | NaOMe  |
| 0.110444 | W001 | CuCl         | EtOH | NaOtBu |
| 0.078067 | W001 | CuCl         | EtOH | KOtBu  |
| 0.427148 | W001 | CuCl         | EtOH | NaOMe  |
| 0.836045 | W001 | CuCl         | MeOH | NaOtBu |
| 0.10111  | W001 | CuCl         | MeOH | KOtBu  |
| 0.006196 | W001 | CuCl         | MeOH | NaOMe  |
| 0.159402 | W001 | Cu(MeCN)4PF6 | EtOH | NaOtBu |

|          |      |              |      |        |
|----------|------|--------------|------|--------|
| 0.143033 | W001 | Cu(MeCN)4PF6 | EtOH | KOtBu  |
| 0.156212 | W001 | Cu(MeCN)4PF6 | EtOH | NaOMe  |
| 0.069051 | W001 | Cu(MeCN)4PF6 | MeOH | NaOtBu |
| 0.071951 | W001 | Cu(MeCN)4PF6 | MeOH | KOtBu  |
| 0.577157 | W001 | Cu(MeCN)4PF6 | MeOH | NaOMe  |
| 1.09201  | W002 | CuCl         | EtOH | NaOtBu |
| 0.560248 | W002 | CuCl         | EtOH | KOtBu  |
| 1.103659 | W002 | CuCl         | EtOH | NaOMe  |
| 2.518972 | W002 | CuCl         | MeOH | NaOtBu |
| 0.09878  | W002 | CuCl         | MeOH | KOtBu  |
| 0.006127 | W002 | CuCl         | MeOH | NaOMe  |
| 0.004938 | W002 | Cu(MeCN)4PF6 | EtOH | NaOtBu |
| 1.212714 | W002 | Cu(MeCN)4PF6 | EtOH | KOtBu  |
| 1.093902 | W002 | Cu(MeCN)4PF6 | EtOH | NaOMe  |
| 2.653563 | W002 | Cu(MeCN)4PF6 | MeOH | NaOtBu |
| 2.591787 | W002 | Cu(MeCN)4PF6 | MeOH | KOtBu  |
| 2.629091 | W002 | Cu(MeCN)4PF6 | MeOH | NaOMe  |
| 1.328475 | M001 | CuCl         | EtOH | NaOtBu |
| 1.695599 | M001 | CuCl         | EtOH | KOtBu  |
| 0.001091 | M001 | CuCl         | EtOH | NaOMe  |
| 1.418634 | M001 | CuCl         | MeOH | NaOtBu |
| 1.5086   | M001 | CuCl         | MeOH | KOtBu  |
| 1.507937 | M001 | CuCl         | MeOH | NaOMe  |
| 1.238876 | M001 | Cu(MeCN)4PF6 | EtOH | NaOtBu |
| 1.154817 | M001 | Cu(MeCN)4PF6 | EtOH | KOtBu  |
| 1.555961 | M001 | Cu(MeCN)4PF6 | EtOH | NaOMe  |
| 1.454982 | M001 | Cu(MeCN)4PF6 | MeOH | NaOtBu |
| 1.402174 | M001 | Cu(MeCN)4PF6 | MeOH | KOtBu  |
| 1.044677 | M001 | Cu(MeCN)4PF6 | MeOH | NaOMe  |
| 0.889976 | M004 | CuCl         | EtOH | NaOtBu |
| 0.477723 | M004 | CuCl         | EtOH | KOtBu  |
| 0.604423 | M004 | CuCl         | EtOH | NaOMe  |
| 0.142331 | M004 | CuCl         | MeOH | NaOtBu |
| 0.115764 | M004 | CuCl         | MeOH | KOtBu  |
| 0.131611 | M004 | CuCl         | MeOH | NaOMe  |
| 0.137136 | M004 | Cu(MeCN)4PF6 | EtOH | NaOtBu |
| 0.515892 | M004 | Cu(MeCN)4PF6 | EtOH | KOtBu  |
| 0.825062 | M004 | Cu(MeCN)4PF6 | EtOH | NaOMe  |
| 0.493888 | M004 | Cu(MeCN)4PF6 | MeOH | NaOtBu |
| 0.574755 | M004 | Cu(MeCN)4PF6 | MeOH | KOtBu  |
| 0.626919 | M004 | Cu(MeCN)4PF6 | MeOH | NaOMe  |
| 1.033898 | P001 | CuCl         | EtOH | NaOtBu |

|          |                                                    |              |      |        |
|----------|----------------------------------------------------|--------------|------|--------|
| 0.675309 | P001                                               | CuCl         | EtOH | KOtBu  |
| 1.165012 | P001                                               | CuCl         | EtOH | NaOMe  |
| 0.15889  | P001                                               | CuCl         | MeOH | NaOtBu |
| 0.01476  | P001                                               | CuCl         | MeOH | KOtBu  |
| 0.049751 | P001                                               | CuCl         | MeOH | NaOMe  |
| 0.771684 | P001                                               | Cu(MeCN)4PF6 | EtOH | NaOtBu |
| 0.788945 | P001                                               | Cu(MeCN)4PF6 | EtOH | KOtBu  |
| 1.530414 | P001                                               | Cu(MeCN)4PF6 | EtOH | NaOMe  |
| 0.43309  | P001                                               | Cu(MeCN)4PF6 | MeOH | NaOtBu |
| 0.520732 | P001                                               | Cu(MeCN)4PF6 | MeOH | KOtBu  |
| 0.644815 | P001                                               | Cu(MeCN)4PF6 | MeOH | NaOMe  |
| 0.310513 | A101                                               | CuCl         | EtOH | NaOtBu |
| 0.292653 | A101                                               | CuCl         | EtOH | KOtBu  |
| 0.412639 | A101                                               | CuCl         | EtOH | NaOMe  |
| 0.428925 | A101                                               | CuCl         | MeOH | NaOtBu |
| 0.034739 | A101                                               | CuCl         | MeOH | KOtBu  |
| 0.135741 | A101                                               | CuCl         | MeOH | NaOMe  |
| 0.153563 | A101                                               | Cu(MeCN)4PF6 | EtOH | NaOtBu |
| 0.353374 | A101                                               | Cu(MeCN)4PF6 | EtOH | KOtBu  |
| 0.50601  | A101                                               | Cu(MeCN)4PF6 | EtOH | NaOMe  |
| 0.159228 | A101                                               | Cu(MeCN)4PF6 | MeOH | NaOtBu |
| 0.15942  | A101                                               | Cu(MeCN)4PF6 | MeOH | KOtBu  |
| 0.252682 | A101                                               | Cu(MeCN)4PF6 | MeOH | NaOMe  |
| 0.138015 | A109                                               | CuCl         | EtOH | NaOtBu |
| 0.420526 | A109                                               | CuCl         | EtOH | KOtBu  |
| 0.110837 | A109                                               | CuCl         | EtOH | NaOMe  |
| 0.063882 | A109                                               | CuCl         | MeOH | NaOtBu |
| 0.034653 | A109                                               | CuCl         | MeOH | KOtBu  |
| 0.079853 | A109                                               | CuCl         | MeOH | NaOMe  |
| 0.451613 | A109                                               | Cu(MeCN)4PF6 | EtOH | NaOtBu |
| 0.502475 | A109                                               | Cu(MeCN)4PF6 | EtOH | KOtBu  |
| 0.160494 | A109                                               | Cu(MeCN)4PF6 | EtOH | NaOMe  |
| 0.082324 | A109                                               | Cu(MeCN)4PF6 | MeOH | NaOtBu |
| 0.001198 | A109                                               | Cu(MeCN)4PF6 | MeOH | KOtBu  |
| 0.021028 | A109                                               | Cu(MeCN)4PF6 | MeOH | NaOMe  |
| 2.600703 | 1,2-Bis[(2S,5S)-2,5-diiisopropylphospholano]ethane | CuCl         | EtOH | NaOtBu |
| 2.709178 | 1,2-Bis[(2S,5S)-2,5-diiisopropylphospholano]ethane | CuCl         | EtOH | KOtBu  |
| 2.610651 | 1,2-Bis[(2S,5S)-2,5-diiisopropylphospholano]ethane | CuCl         | EtOH | NaOMe  |
| 1.465844 | 1,2-Bis[(2S,5S)-2,5-diiisopropylphospholano]ethane | CuCl         | MeOH | NaOtBu |
| 1.091856 | 1,2-Bis[(2S,5S)-2,5-diiisopropylphospholano]ethane | CuCl         | MeOH | KOtBu  |

|          |                                                                     |                                       |      |        |
|----------|---------------------------------------------------------------------|---------------------------------------|------|--------|
| 1.181058 | 1,2-Bis[(2 <i>S</i> ,5 <i>S</i> )-2,5-diisopropylphospholano]ethane | CuCl                                  | MeOH | NaOMe  |
| 1.028143 | 1,2-Bis[(2 <i>S</i> ,5 <i>S</i> )-2,5-diisopropylphospholano]ethane | Cu(MeCN) <sub>4</sub> PF <sub>6</sub> | EtOH | NaOtBu |
| 2.075935 | 1,2-Bis[(2 <i>S</i> ,5 <i>S</i> )-2,5-diisopropylphospholano]ethane | Cu(MeCN) <sub>4</sub> PF <sub>6</sub> | EtOH | KOtBu  |
| 2.171893 | 1,2-Bis[(2 <i>S</i> ,5 <i>S</i> )-2,5-diisopropylphospholano]ethane | Cu(MeCN) <sub>4</sub> PF <sub>6</sub> | EtOH | NaOMe  |
| 1.812956 | 1,2-Bis[(2 <i>S</i> ,5 <i>S</i> )-2,5-diisopropylphospholano]ethane | Cu(MeCN) <sub>4</sub> PF <sub>6</sub> | MeOH | NaOtBu |
| 1.93833  | 1,2-Bis[(2 <i>S</i> ,5 <i>S</i> )-2,5-diisopropylphospholano]ethane | Cu(MeCN) <sub>4</sub> PF <sub>6</sub> | MeOH | KOtBu  |
| 1.515672 | 1,2-Bis[(2 <i>S</i> ,5 <i>S</i> )-2,5-diisopropylphospholano]ethane | Cu(MeCN) <sub>4</sub> PF <sub>6</sub> | MeOH | NaOMe  |
| 0.44881  | ( <i>S</i> , <i>S</i> )- <i>i</i> -Pr-DUPHOS                        | CuCl                                  | EtOH | NaOtBu |
| 0.396635 | ( <i>S</i> , <i>S</i> )- <i>i</i> -Pr-DUPHOS                        | CuCl                                  | EtOH | KOtBu  |
| 0.429963 | ( <i>S</i> , <i>S</i> )- <i>i</i> -Pr-DUPHOS                        | CuCl                                  | EtOH | NaOMe  |
| 0.240537 | ( <i>S</i> , <i>S</i> )- <i>i</i> -Pr-DUPHOS                        | CuCl                                  | MeOH | NaOtBu |
| 0.225885 | ( <i>S</i> , <i>S</i> )- <i>i</i> -Pr-DUPHOS                        | CuCl                                  | MeOH | KOtBu  |
| 0.222494 | ( <i>S</i> , <i>S</i> )- <i>i</i> -Pr-DUPHOS                        | CuCl                                  | MeOH | NaOMe  |
| 0.242718 | ( <i>S</i> , <i>S</i> )- <i>i</i> -Pr-DUPHOS                        | Cu(MeCN) <sub>4</sub> PF <sub>6</sub> | EtOH | NaOtBu |
| 0.446886 | ( <i>S</i> , <i>S</i> )- <i>i</i> -Pr-DUPHOS                        | Cu(MeCN) <sub>4</sub> PF <sub>6</sub> | EtOH | KOtBu  |
| 0.00122  | ( <i>S</i> , <i>S</i> )- <i>i</i> -Pr-DUPHOS                        | Cu(MeCN) <sub>4</sub> PF <sub>6</sub> | EtOH | NaOMe  |
| 0.302184 | ( <i>S</i> , <i>S</i> )- <i>i</i> -Pr-DUPHOS                        | Cu(MeCN) <sub>4</sub> PF <sub>6</sub> | MeOH | NaOtBu |
| 0.285714 | ( <i>S</i> , <i>S</i> )- <i>i</i> -Pr-DUPHOS                        | Cu(MeCN) <sub>4</sub> PF <sub>6</sub> | MeOH | KOtBu  |
| 0.324228 | ( <i>S</i> , <i>S</i> )- <i>i</i> -Pr-DUPHOS                        | Cu(MeCN) <sub>4</sub> PF <sub>6</sub> | MeOH | NaOMe  |
| 1.690931 | <i>S</i> , <i>S</i> -Me-BozPhos                                     | CuCl                                  | EtOH | NaOtBu |
| 1.914081 | <i>S</i> , <i>S</i> -Me-BozPhos                                     | CuCl                                  | EtOH | KOtBu  |
| 1.988138 | <i>S</i> , <i>S</i> -Me-BozPhos                                     | CuCl                                  | EtOH | NaOMe  |
| 1.337947 | <i>S</i> , <i>S</i> -Me-BozPhos                                     | CuCl                                  | MeOH | NaOtBu |
| 1.376579 | <i>S</i> , <i>S</i> -Me-BozPhos                                     | CuCl                                  | MeOH | KOtBu  |
| 1.347191 | <i>S</i> , <i>S</i> -Me-BozPhos                                     | CuCl                                  | MeOH | NaOMe  |
| 0        | <i>S</i> , <i>S</i> -Me-BozPhos                                     | Cu(MeCN) <sub>4</sub> PF <sub>6</sub> | EtOH | NaOtBu |
| 0        | <i>S</i> , <i>S</i> -Me-BozPhos                                     | Cu(MeCN) <sub>4</sub> PF <sub>6</sub> | EtOH | KOtBu  |
| 0        | <i>S</i> , <i>S</i> -Me-BozPhos                                     | Cu(MeCN) <sub>4</sub> PF <sub>6</sub> | EtOH | NaOMe  |
| 1.493743 | <i>S</i> , <i>S</i> -Me-BozPhos                                     | Cu(MeCN) <sub>4</sub> PF <sub>6</sub> | MeOH | NaOtBu |
| 1.537844 | <i>S</i> , <i>S</i> -Me-BozPhos                                     | Cu(MeCN) <sub>4</sub> PF <sub>6</sub> | MeOH | KOtBu  |
| 1.764097 | <i>S</i> , <i>S</i> -Me-BozPhos                                     | Cu(MeCN) <sub>4</sub> PF <sub>6</sub> | MeOH | NaOMe  |

Screen 2:

| <u>Solvent</u> | <u>Base</u>   | <u>Lig</u> | <u>Copper Source</u> |
|----------------|---------------|------------|----------------------|
| THF/EtOH       | KOMe (1 eq)   | TSDPEN     | CuCl                 |
| EtOH           | NaOtBu (1 eq) | L4019      |                      |
|                | KOMe (0.3 eq) | P-PHOS     |                      |
|                |               | BDPP       |                      |



T-BINAP  
 SI-PHOS  
 SEGPHOS  
 QUINOXP  
 H8BINAP  
 DMSEG  
 DTBMSEG  
 PYBOX  
 DIOP  
 ISOBORNEOL  
 L680192  
 L4026

| <u>P/IS</u> | <u>Solvent</u> | <u>Base</u> | <u>Lig</u> |
|-------------|----------------|-------------|------------|
| 0.656245    | THF/EtOH       | 30% KOMe    | TSDPEN     |
| 0.668491    | THF/EtOH       | 30% KOMe    | L4019      |
| 1.376753    | THF/EtOH       | 30% KOMe    | P-PHOS     |
| 2.041838    | THF/EtOH       | 30% KOMe    | BDPP       |
| 1.133252    | THF/EtOH       | 30% KOMe    | T-BINAP    |
| 2.021933    | THF/EtOH       | 30% KOMe    | SI-PHOS    |
| 0.790196    | THF/EtOH       | 30% KOMe    | SEGPHOS    |
| 2.148606    | THF/EtOH       | 30% KOMe    | QUINOXP    |
| 0.606539    | THF/EtOH       | 30% KOMe    | H8BINAP    |
| 0.727864    | THF/EtOH       | 30% KOMe    | DMSEG      |
| 0.636224    | THF/EtOH       | 30% KOMe    | DTBMSEG    |
| 0.785619    | THF/EtOH       | 30% KOMe    | PYBOX      |
| 2.02251     | THF/EtOH       | 30% KOMe    | DIOP       |
| 0.966893    | THF/EtOH       | 30% KOMe    | ISOBORNEOL |
| 0           | THF/EtOH       | 30% KOMe    | L680192    |
| 0.517263    | THF/EtOH       | 30% KOMe    | L4026      |
| 0.908348    | EtOH           | 30% KOMe    | TSDPEN     |
| 1.907065    | EtOH           | 30% KOMe    | L4019      |
| 0.791761    | EtOH           | 30% KOMe    | P-PHOS     |
| 1.585064    | EtOH           | 30% KOMe    | BDPP       |
| 0.536845    | EtOH           | 30% KOMe    | T-BINAP    |
| 2.017474    | EtOH           | 30% KOMe    | SI-PHOS    |
| 2.121193    | EtOH           | 30% KOMe    | SEGPHOS    |
| 0.317455    | EtOH           | 30% KOMe    | QUINOXP    |
| 0.472133    | EtOH           | 30% KOMe    | H8BINAP    |
| 0.366804    | EtOH           | 30% KOMe    | DMSEG      |
| 0.747695    | EtOH           | 30% KOMe    | DTBMSEG    |
| 0.409246    | EtOH           | 30% KOMe    | PYBOX      |
| 0.942743    | EtOH           | 30% KOMe    | DIOP       |
| 1.92415     | EtOH           | 30% KOMe    | ISOBORNEOL |
| 0.288743    | EtOH           | 30% KOMe    | L680192    |
| 0.446385    | EtOH           | 30% KOMe    | L4026      |
| 1.299504    | THF/EtOH       | 100% KOMe   | TSDPEN     |

|          |          |                |            |
|----------|----------|----------------|------------|
| 0.67906  | THF/EtOH | 100% KOMe      | L4019      |
| 1.830777 | THF/EtOH | 100% KOMe      | P-PHOS     |
| 1.872404 | THF/EtOH | 100% KOMe      | BDPP       |
| 1.586868 | THF/EtOH | 100% KOMe      | T-BINAP    |
| 1.561378 | THF/EtOH | 100% KOMe      | SI-PHOS    |
| 2.114155 | THF/EtOH | 100% KOMe      | SEGPHOS    |
| 1.310541 | THF/EtOH | 100% KOMe      | QUINOXP    |
| 1.187942 | THF/EtOH | 100% KOMe      | H8BINAP    |
| 1.536486 | THF/EtOH | 100% KOMe      | DMSEG      |
| 0.586587 | THF/EtOH | 100% KOMe      | DTBMSEG    |
| 1.79532  | THF/EtOH | 100% KOMe      | PYBOX      |
| 1.879143 | THF/EtOH | 100% KOMe      | DIOP       |
| 1.949496 | THF/EtOH | 100% KOMe      | ISOBORNEOL |
| 1.990982 | THF/EtOH | 100% KOMe      | L680192    |
| 1.463468 | THF/EtOH | 100% KOMe      | L4026      |
| 2.312283 | EtOH     | 100% KOMe      | TSDPEN     |
| 0.260064 | EtOH     | 100% KOMe      | L4019      |
| 1.453354 | EtOH     | 100% KOMe      | P-PHOS     |
| 2.030701 | EtOH     | 100% KOMe      | BDPP       |
| 2.020201 | EtOH     | 100% KOMe      | T-BINAP    |
| 1.11044  | EtOH     | 100% KOMe      | SI-PHOS    |
| 0.778548 | EtOH     | 100% KOMe      | SEGPHOS    |
| 2.218701 | EtOH     | 100% KOMe      | QUINOXP    |
| 0.614301 | EtOH     | 100% KOMe      | H8BINAP    |
| 1.066018 | EtOH     | 100% KOMe      | DMSEG      |
| 0.633348 | EtOH     | 100% KOMe      | DTBMSEG    |
| 0.702564 | EtOH     | 100% KOMe      | PYBOX      |
| 2.046092 | EtOH     | 100% KOMe      | DIOP       |
| 2.020534 | EtOH     | 100% KOMe      | ISOBORNEOL |
| 2.458053 | EtOH     | 100% KOMe      | L680192    |
| 0.81329  | EtOH     | 100% KOMe      | L4026      |
| 1.313059 | THF/EtOH | 100%<br>NaOtBu | TSDPEN     |
| 1.582472 | THF/EtOH | 100%<br>NaOtBu | L4019      |
| 1.843662 | THF/EtOH | 100%<br>NaOtBu | P-PHOS     |
| 0.139049 | THF/EtOH | 100%<br>NaOtBu | BDPP       |
| 2.032076 | THF/EtOH | 100%<br>NaOtBu | T-BINAP    |
| 1.565135 | THF/EtOH | 100%<br>NaOtBu | SI-PHOS    |
| 2.00649  | THF/EtOH | 100%<br>NaOtBu | SEGPHOS    |
| 0.472921 | THF/EtOH | 100%<br>NaOtBu | QUINOXP    |
| 1.333286 | THF/EtOH | 100%<br>NaOtBu | H8BINAP    |
| 1.221851 | THF/EtOH | 100%<br>NaOtBu | DMSEG      |
| 2.315701 | THF/EtOH | 100%           | DTBMSEG    |

|          |          |                |            |
|----------|----------|----------------|------------|
| 0.939396 | THF/EtOH | NaOtBu<br>100% | PYBOX      |
| 1.807193 | THF/EtOH | NaOtBu<br>100% | DIOP       |
| 1.81734  | THF/EtOH | NaOtBu<br>100% | ISOBORNEOL |
| 2.442484 | THF/EtOH | NaOtBu<br>100% | L680192    |
| 2.482793 | THF/EtOH | NaOtBu<br>100% | L4026      |
| 1.980405 | EtOH     | NaOtBu<br>100% | TSDPEN     |
| 2.258977 | EtOH     | NaOtBu<br>100% | L4019      |
| 0.071429 | EtOH     | NaOtBu<br>100% | P-PHOS     |
| 2.076045 | EtOH     | NaOtBu<br>100% | BDPP       |
| 1.222838 | EtOH     | NaOtBu<br>100% | T-BINAP    |
| 2.274281 | EtOH     | NaOtBu<br>100% | SI-PHOS    |
| 0.365572 | EtOH     | NaOtBu<br>100% | SEGPHOS    |
| 1.897321 | EtOH     | NaOtBu<br>100% | QUINOXP    |
| 0.795546 | EtOH     | NaOtBu<br>100% | H8BINAP    |
| 1.452351 | EtOH     | NaOtBu<br>100% | DMSEG      |
| 2.135887 | EtOH     | NaOtBu<br>100% | DTBMSEG    |
| 1.222081 | EtOH     | NaOtBu<br>100% | PYBOX      |
| 1.97988  | EtOH     | NaOtBu<br>100% | DIOP       |
| 2.295937 | EtOH     | NaOtBu<br>100% | ISOBORNEOL |
| 2.484418 | EtOH     | NaOtBu<br>100% | L680192    |
| 2.206374 | EtOH     | NaOtBu<br>100% | L4026      |

Screen 3:

| <u>Copper Source</u> | <u>Solvent</u> | <u>Base</u> |
|----------------------|----------------|-------------|
| CuCl                 | THF/EtOH       | LiOMe       |
|                      | EtOH           | KOMe (2 eq) |
|                      | Tol/EtOH       | NaOtBu      |
|                      | MeOH           | KOMe (1 eq) |

| <u>P/IS</u> | <u>SM/IS</u> | <u>Copper Source</u> | <u>Solvent</u> | <u>Base</u> |
|-------------|--------------|----------------------|----------------|-------------|
| 0.904621    | 1.919561     | CuCl                 | THF/EtOH       | LiOMe       |
| 1.284356    | 1.935944     | CuCl                 | EtOH           | LiOMe       |
| 0.455347    | 2.249269     | CuCl                 | Tol/EtOH       | LiOMe       |
| 1.299996    | 1.573508     | CuCl                 | MeOH           | LiOMe       |
| 1.820372    | 1.308925     | CuCl                 | THF/EtOH       | KOMe (2 eq) |
| 2.020508    | 0.779745     | CuCl                 | EtOH           | KOMe (2 eq) |
| 2.599796    | 1.040214     | CuCl                 | Tol/EtOH       | KOMe (2 eq) |
| 2.930012    | 0.405905     | CuCl                 | MeOH           | KOMe (2 eq) |
| 2.498416    | 1.035116     | CuCl                 | THF/EtOH       | KOMe        |
| 2.996465    | 0.585672     | CuCl                 | EtOH           | KOMe        |
| 3.121672    | 0.548854     | CuCl                 | Tol/EtOH       | KOMe        |
| 3.164455    | 0.121214     | CuCl                 | MeOH           | KOMe        |
| 3.34314     | 0.342271     | CuCl                 | THF/EtOH       | NaOtBu      |
| 3.313477    | 0.459934     | CuCl                 | EtOH           | NaOtBu      |
| 3.255249    | 0.41157      | CuCl                 | Tol/EtOH       | NaOtBu      |
| 3.22456     | 0.123677     | CuCl                 | MeOH           | NaOtBu      |

## Chromatograms:

Analysis of 3-Hydroxy-N-(4-methoxyphenyl)butanamide (2a-OH) using SFC (Column OD-H, 10% *i*-PrOH, 2 mL, 10\_MPa).

Chromatogram of oxidized racemic borylation product:

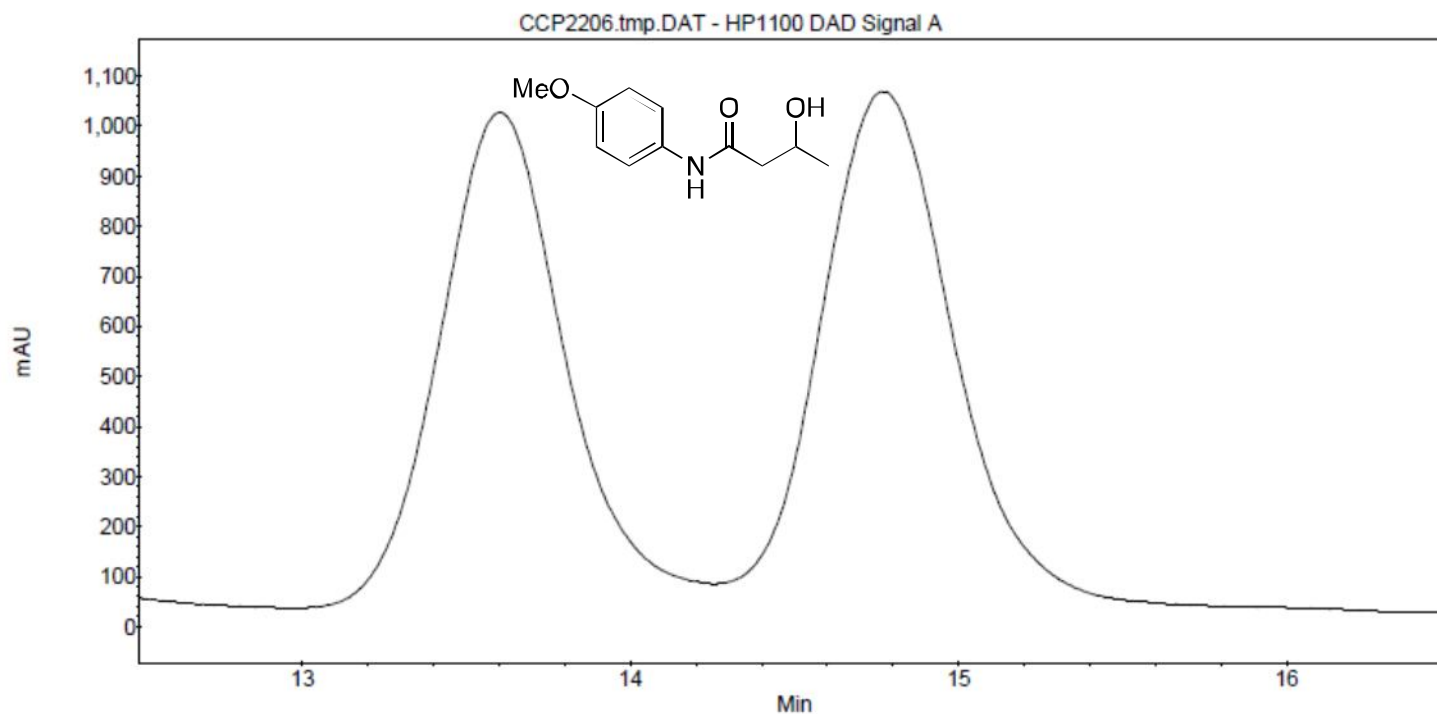

## Peak results:

| Index | Name    | Time  | Area      | As. USP | Height | NTP USP | Selectivity | Signal to Noise Ratio | Width |
|-------|---------|-------|-----------|---------|--------|---------|-------------|-----------------------|-------|
|       |         | [Min] | [mAU*min] |         | [mAU]  |         |             |                       | [Min] |
| 1     | UNKNOWN | 13.60 | 418.7929  | 1.18    | 974.21 | 6588.56 | 0.00        | 1337.0816             | 0.39  |
| 2     | UNKNOWN | 14.77 | 429.1280  | 1.10    | 985.40 | 7315.77 | 1.09        | 1352.4384             | 0.41  |
| Total |         |       | 847.9209  |         |        |         |             |                       |       |

Analysis of (*R*)-3-Hydroxy-*N*-(4-methoxyphenyl)butanamide (2a-OH) using SFC (Column OD-H, 10% *i*-PrOH, 2 mL, 10\_MPa).

Chromatogram of oxidized enantioenriched borylation product from BBA:

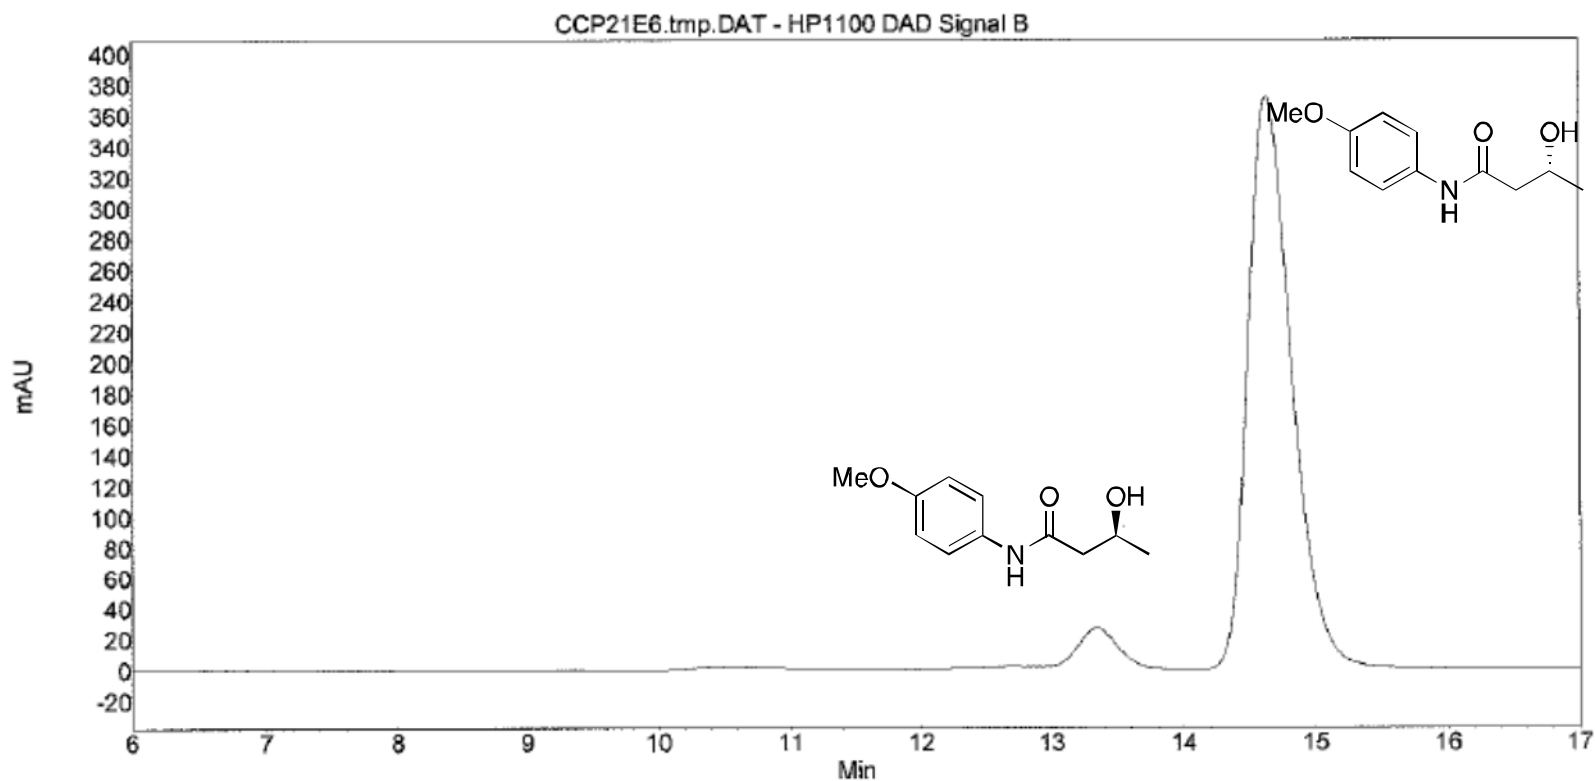

Peak results:

| Index | Name    | Start | Time  | End   | RT Offset | Quantity | Height | Area     | Area    |
|-------|---------|-------|-------|-------|-----------|----------|--------|----------|---------|
|       |         | [Min] | [Min] | [Min] | [Min]     | [% Area] | [μV]   | [μV.Min] | [%]     |
| 1     | UNKNOWN | 12.93 | 13.35 | 14.10 | 0.00      | 6.43     | 26.7   | 9.9      | 6.427   |
| 2     | UNKNOWN | 14.10 | 14.63 | 16.64 | 0.00      | 93.57    | 371.7  | 144.6    | 93.573  |
| Total |         |       |       |       |           | 100.00   | 398.4  | 154.6    | 100.000 |

Analysis of (*R*)-3-Hydroxy-*N*-(4-methoxyphenyl)butanamide (2a-OH) using SFC (Column OD-H, 10% *i*-PrOH, 2 mL, 10\_MPa).

Chromatogram of oxidized enantioenriched borylation product from tetrakis(dimethylamino)diboron:

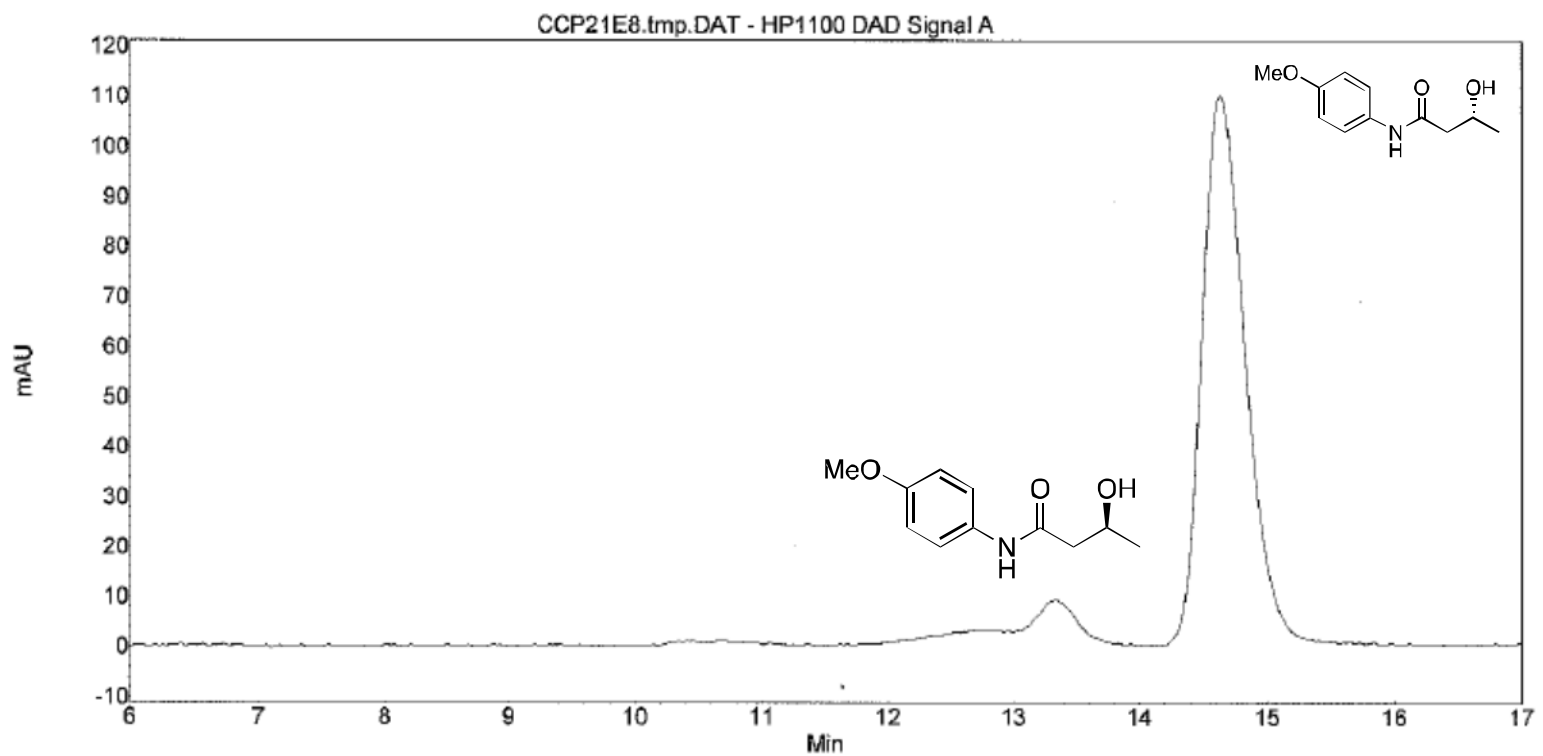

Peak results:

| Index | Name    | Time  | Area      | As. USP | Height | NTP USP  | Selectivity | Signal to Noise Ratio | Width |
|-------|---------|-------|-----------|---------|--------|----------|-------------|-----------------------|-------|
|       |         | [Min] | [mAU*min] |         | [mAU]  |          |             |                       | [Min] |
| 1     | UNKNOWN | 13.35 | 2.8500    | 0.95    | 7.82   | 10195.20 | 0.00        | 23.5562               | 0.34  |
| 2     | UNKNOWN | 14.63 | 42.1337   | 1.34    | 109.58 | 9302.84  | 1.10        | 330.0324              | 0.36  |
| Total |         |       | 44.9836   |         |        |          |             |                       |       |

Analysis of 3-Hydroxy-N-(4-methoxyphenyl)octanamide (2b-OH) using SFC (Column OD-H, 10% *i*-PrOH, 2 mL, 10\_MPa).

Chromatogram of oxidized racemic borylation product:

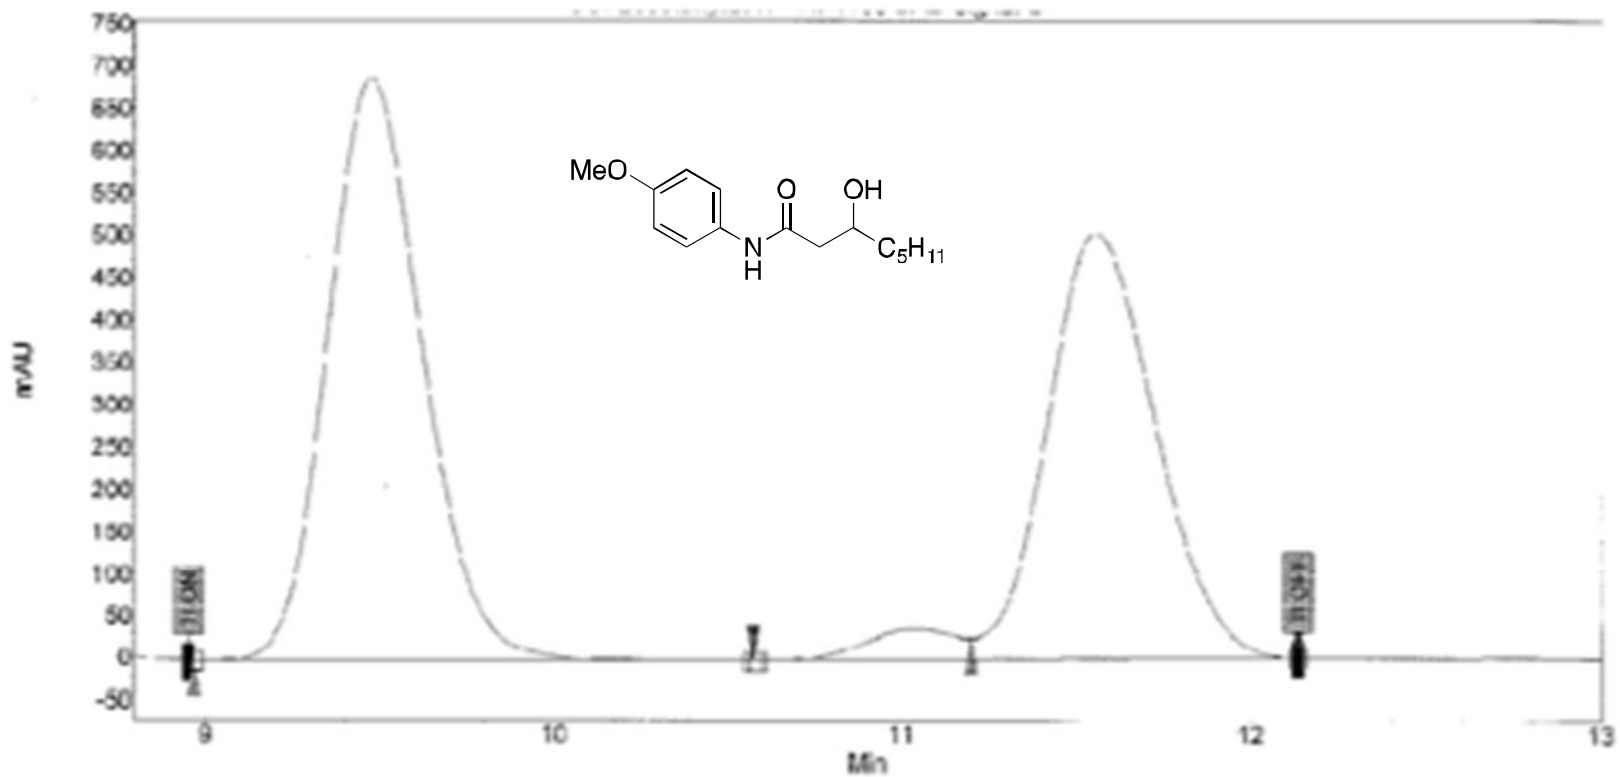

Peak results:

| Index | Name    | Start [Min] | Time [Min] | End [Min] | RT Offset [Min] | Quantity [% Area] | Height [μV] | Area [μV.Min] | Area [%] |
|-------|---------|-------------|------------|-----------|-----------------|-------------------|-------------|---------------|----------|
| 1     | UNKNOWN | 8.97        | 9.47       | 10.57     | 0.00            | 54.45             | 668.6       | 216.1         | 54.454   |
| 2     | UNKNOWN | 11.20       | 11.55      | 12.13     | 0.00            | 45.55             | 503.5       | 180.8         | 45.546   |
| Total |         |             |            |           |                 | 100.00            | 1162.1      | 396.9         | 100.000  |



Analysis of (*R*)-3-Hydroxy-*N*-(4-methoxyphenyl)octanamide (2b-OH) using SFC (Column OD-H, 10% *i*-PrOH, 2 mL, 10\_MPa).

Chromatogram of oxidized enantioenriched borylation product from BBA:

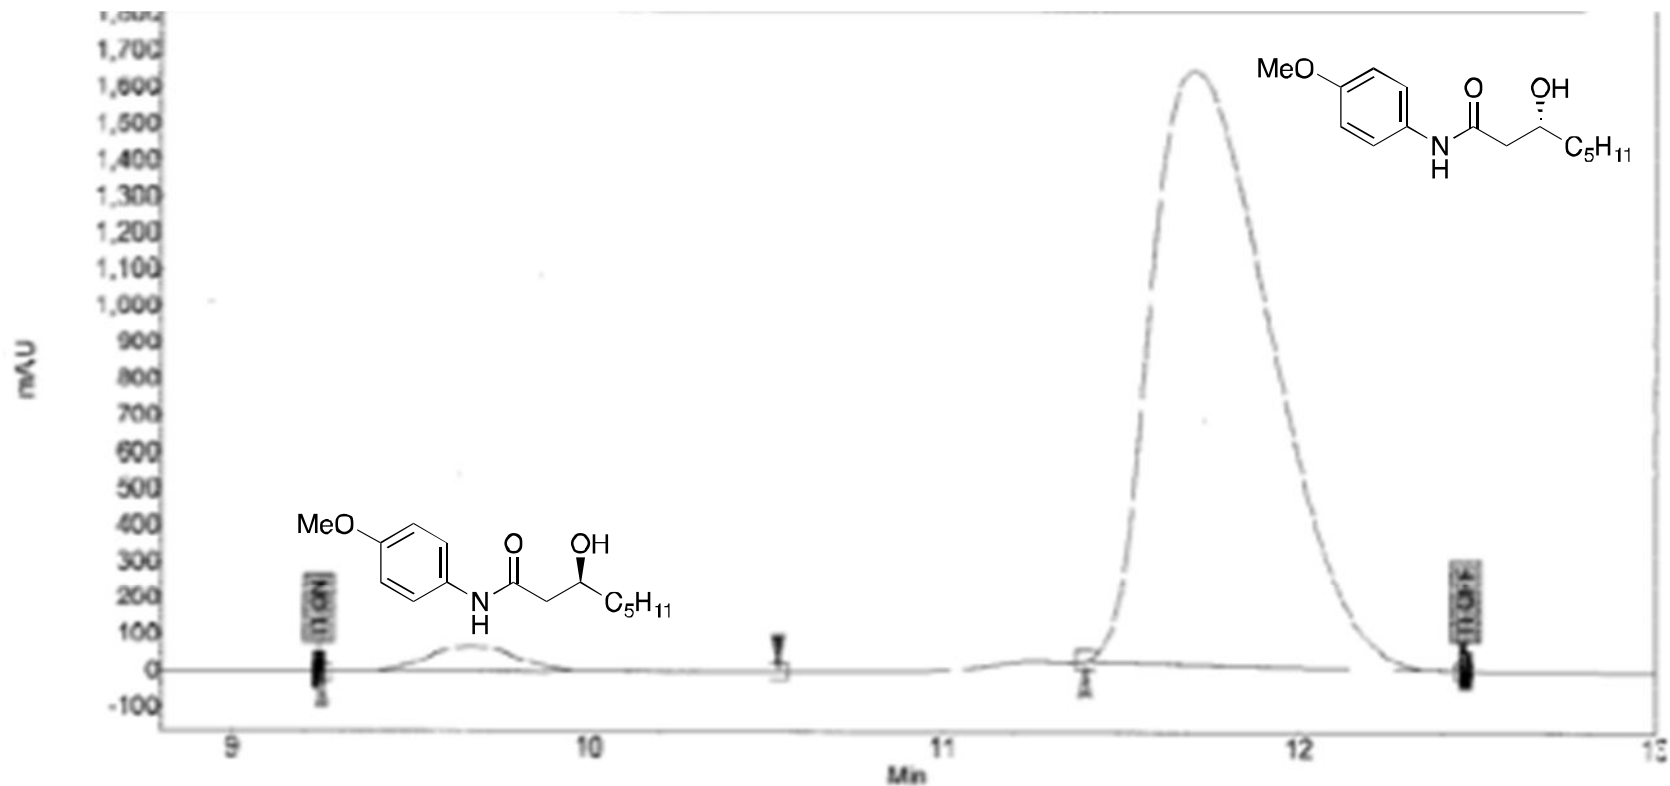

Peak results:

| Indx  | Name    | Start | Time  | End   | RT Offset | Quantity | Height     | Area           | Area    |
|-------|---------|-------|-------|-------|-----------|----------|------------|----------------|---------|
|       |         | [Min] | [Min] | [Min] | [Min]     | [% Area] | [ $\mu$ V] | [ $\mu$ V Min] | [%]     |
| 1     | UNKNOWN | 9.25  | 9.67  | 10.53 | 0.00      | 3.06     | 64.1       | 19.9           | 3.051   |
| 2     | UNKNOWN | 11.40 | 11.71 | 12.45 | 0.00      | 96.94    | 1528.3     | 630.7          | 96.939  |
| Total |         |       |       |       |           | 100.00   | 1592.4     | 650.6          | 100.000 |

Analysis of 3-Hydroxy-N-phenylbutanamide (2c-OH) using SFC (Column OD-H, 10% *i*-PrOH, 2 mL, 10\_MPa).

Chromatogram of oxidized racemic borylation product:

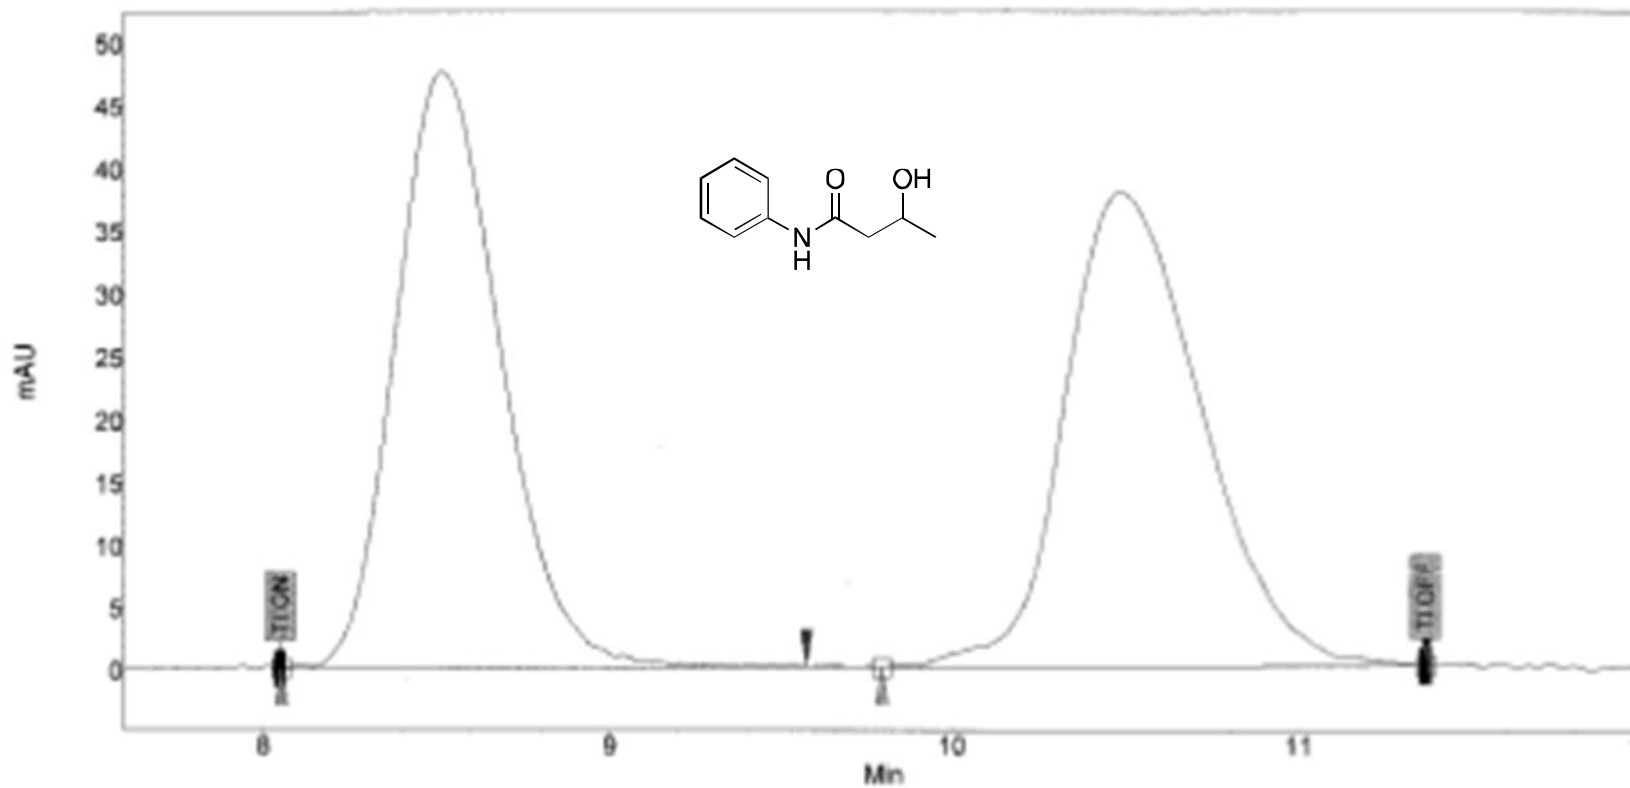

Peak results:

| Index | Name    | Time  | Area      | As. USP | Height | NTP USP | Selectivity | Signal to Noise Ratio | Width |
|-------|---------|-------|-----------|---------|--------|---------|-------------|-----------------------|-------|
|       |         | [Min] | [mAU*min] |         | [mAU]  |         |             |                       | [Min] |
| 1     | UNKNOWN | 8.51  | 16.8402   | 1.23    | 47.58  | 3815.55 | 0.00        | 46.2419               | 0.33  |
| 2     | UNKNOWN | 10.49 | 17.2973   | 1.24    | 37.83  | 3473.01 | 1.23        | 36.7829               | 0.42  |
| Total |         |       | 34.1376   |         |        |         |             |                       |       |

Analysis of (*R*)-3-Hydroxy-*N*-phenylbutanamide (2c-OH) using SFC (Column OD-H, 10% *i*-PrOH, 2 mL, 10\_MPa).

Chromatogram of oxidized enantioenriched borylation product from BBA:

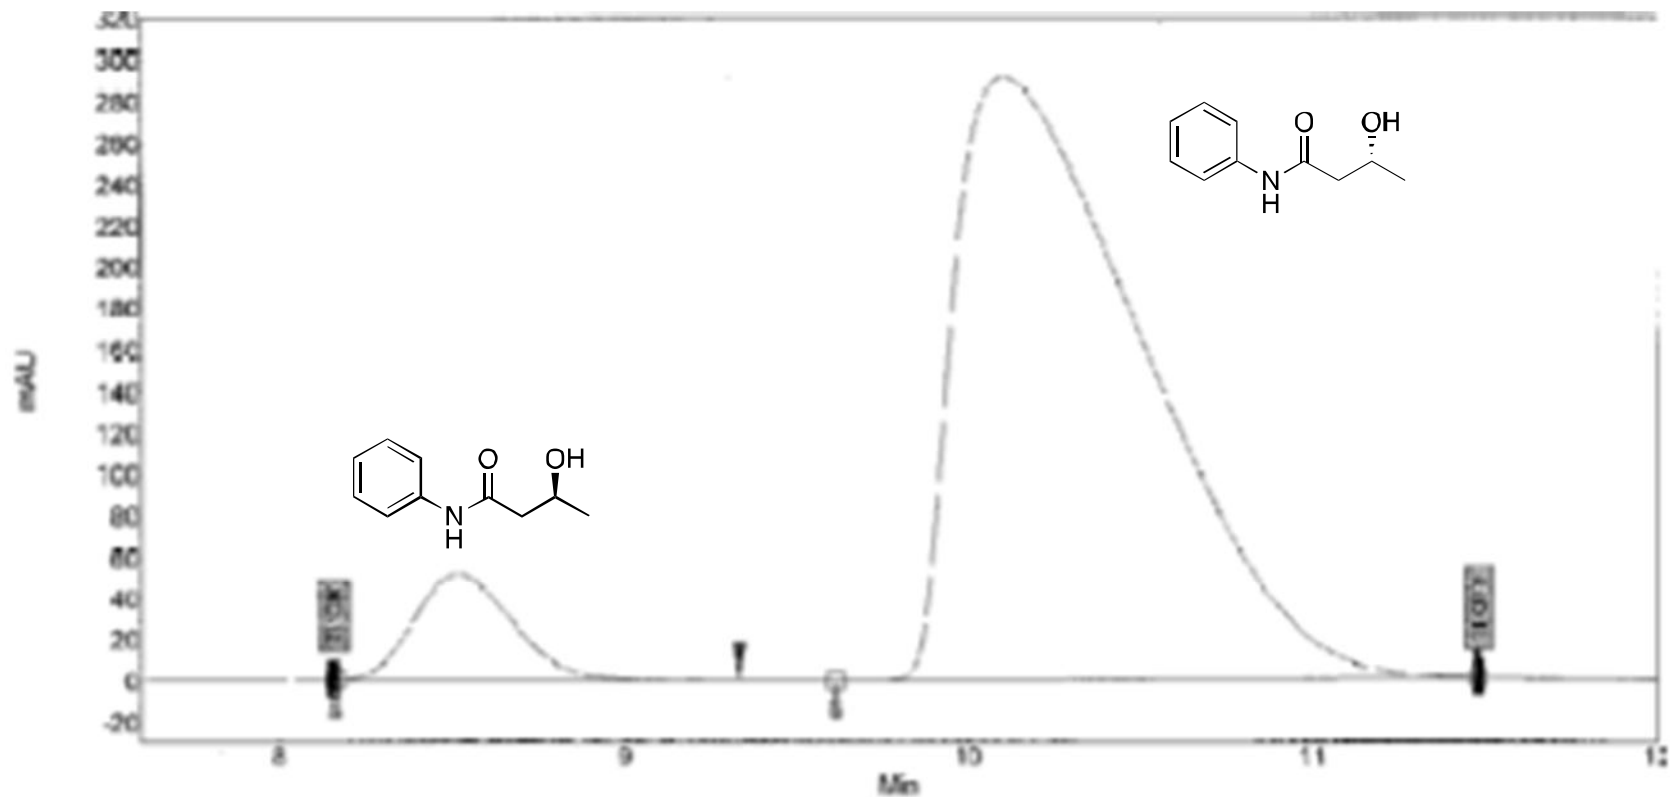

Peak results:

| Index | Name    | Time  | Area      | As USP | Height | NTP USP | Selectivity | Signal to Noise Ratio | Width |
|-------|---------|-------|-----------|--------|--------|---------|-------------|-----------------------|-------|
|       |         | [Min] | [mAU*min] |        | [mAU]  |         |             |                       | [Min] |
| 1     | UNKNOWN | 8.81  | 18.8188   | 1.19   | 51.10  | 4371.88 | 0.00        | 49.2762               | 0.30  |
| 2     | UNKNOWN | 10.11 | 183.6412  | 2.41   | 290.08 | 1643.70 | 1.19        | 279.7388              | 0.61  |
| Total |         |       | 202.4600  |        |        |         |             |                       |       |

Analysis of *N*-Cyclohexyl-3-hydroxybutanamide (2d-OH) using SFC (Column OD-H, 10% *i*-PrOH, 2 mL, 10\_MPa).

Chromatogram of oxidized racemic borylation product:

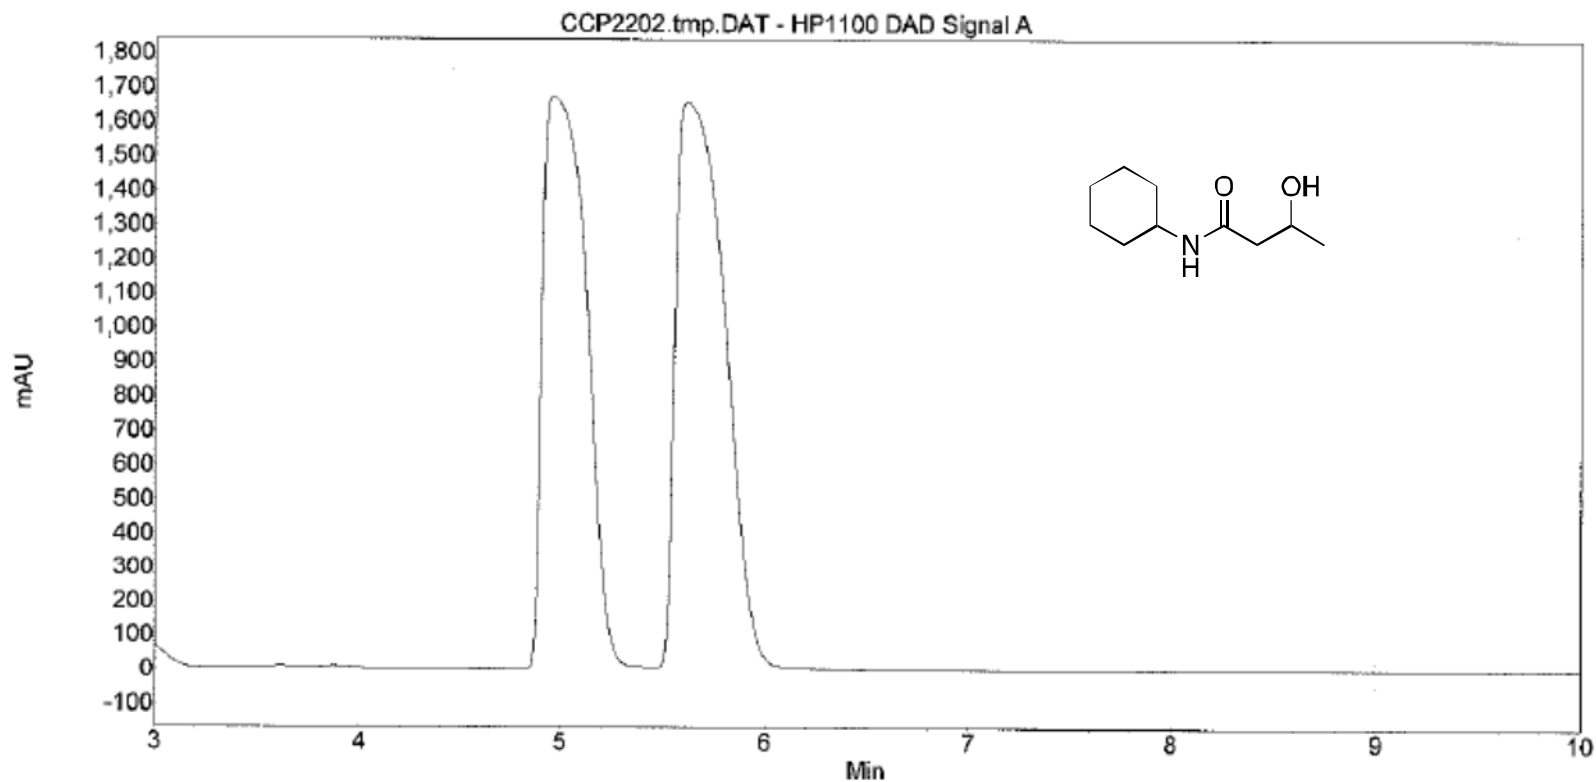

Peak results:

| Index | Name    | Time<br>[Min] | Area<br>[mAU*min] | As. USP | Height<br>[mAU] | NTP USP | Selectivity | Signal to Noise Ratio | Width<br>[Min] |
|-------|---------|---------------|-------------------|---------|-----------------|---------|-------------|-----------------------|----------------|
| 1     | UNKNOWN | 4.96          | 415.1601          | 2.10    | 1669.38         | 3192.15 | 0.00        | 284.5519              | 0.25           |
| 2     | UNKNOWN | 5.61          | 431.4351          | 2.31    | 1627.49         | 3204.86 | 1.13        | 277.4114              | 0.27           |
| Total |         |               | 846.5952          |         |                 |         |             |                       |                |

Analysis of (*R*)-*N*-Cyclohexyl-3-hydroxybutanamide (2d-OH) using SFC (Column OD-H, 10% *i*-PrOH, 2 mL, 10\_MPa).

Chromatogram of oxidized enantioenriched borylation product from BBA:

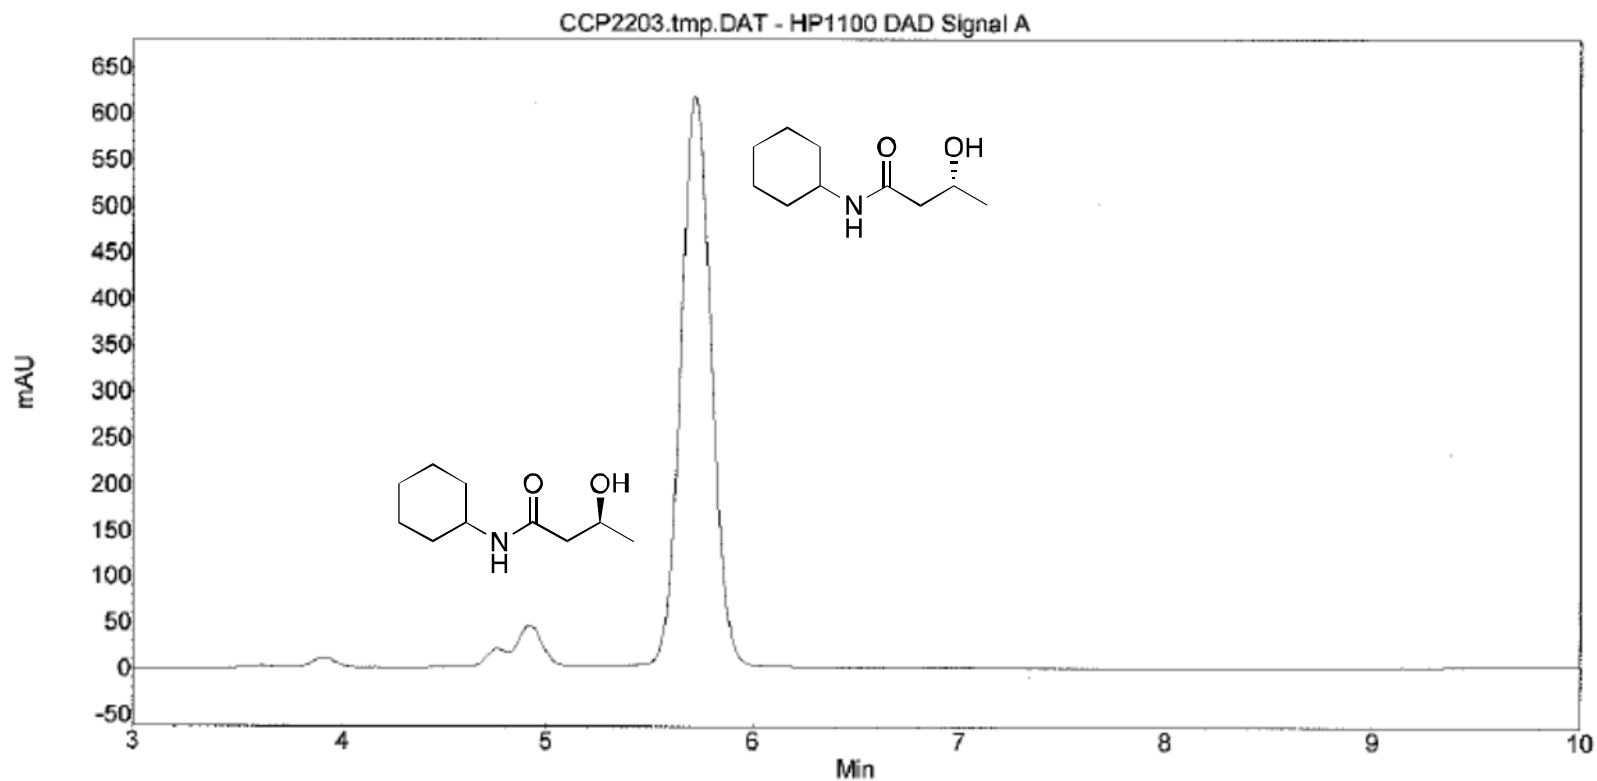

Peak results:

| Index | Name    | Time  | Area      | As. USP | Height | NTP USP | Selectivity | Signal to Noise Ratio | Width |
|-------|---------|-------|-----------|---------|--------|---------|-------------|-----------------------|-------|
|       |         | [Min] | [mAU*min] |         | [mAU]  |         |             |                       | [Min] |
| 1     | UNKNOWN | 4.92  | 5.9428    | 0.77    | 39.30  | 8619.38 | 0.00        | 143.1687              | 0.12  |
| 2     | UNKNOWN | 5.72  | 105.9349  | 1.07    | 616.40 | 6671.53 | 1.16        | 2245.7603             | 0.16  |
| Total |         |       | 111.8777  |         |        |         |             |                       |       |

Analysis of (*R*)-*N*-Cyclohexyl-3-hydroxybutanamide (2d-OH) using SFC (Column OD-H, 10% *i*-PrOH, 2 mL, 10\_MPa).

Chromatogram of oxidized enantioenriched borylation product from tetrakis(dimethylamino)diboron:

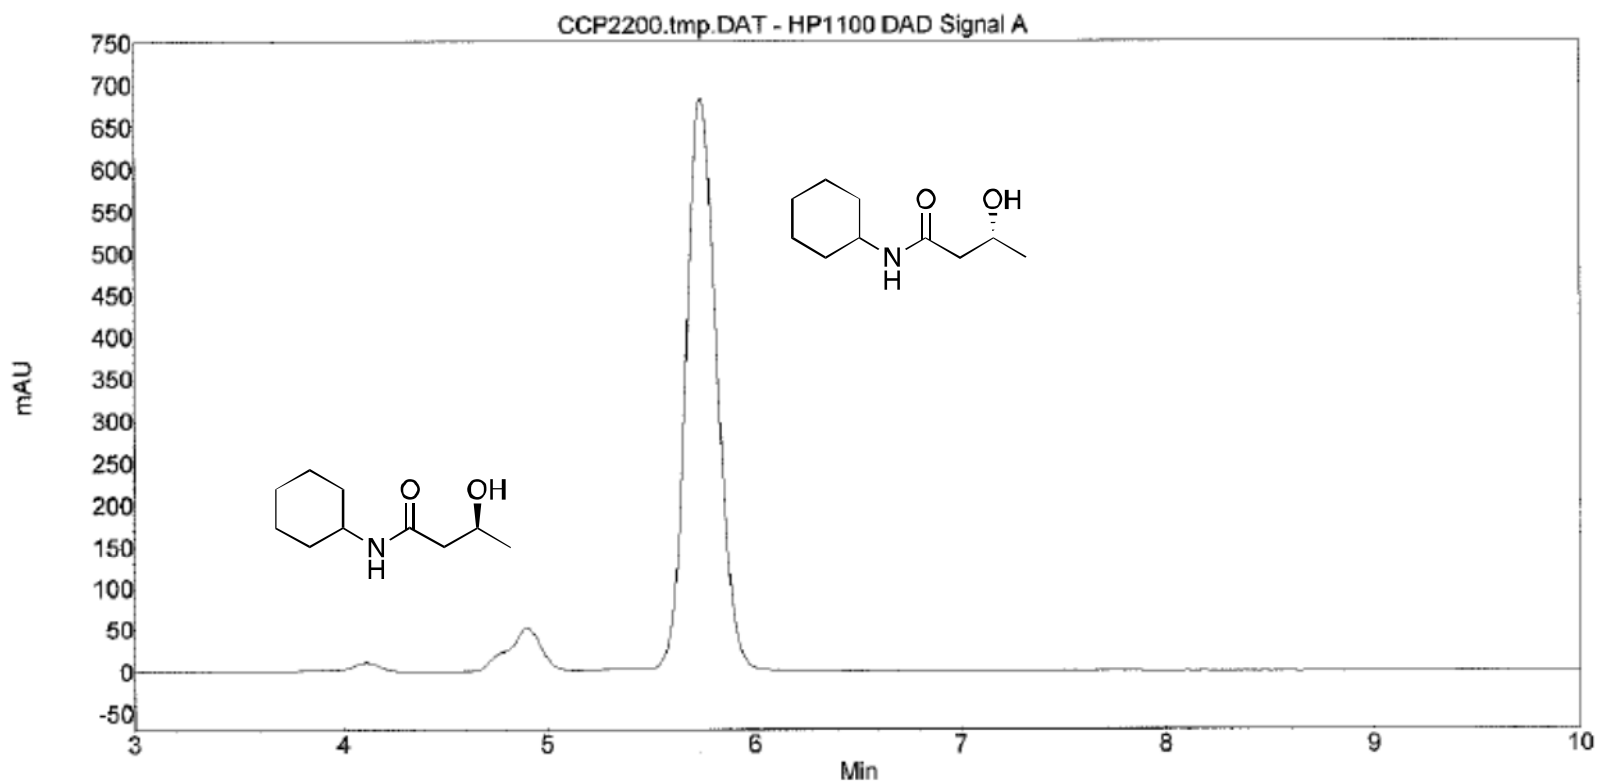

Peak results:

| Index | Name    | Time  | Area      | As. USP | Height | NTP USP | Selectivity | Signal to Noise Ratio | Width |
|-------|---------|-------|-----------|---------|--------|---------|-------------|-----------------------|-------|
|       |         | [Min] | [mAU*min] |         | [mAU]  |         |             |                       | [Min] |
| 1     | UNKNOWN | 4.91  | 6.0068    | 0.82    | 41.46  | 7505.21 | 0.00        | 75.4053               | 0.13  |
| 2     | UNKNOWN | 5.75  | 117.6686  | 1.06    | 682.78 | 6712.60 | 1.17        | 1241.7006             | 0.16  |
| Total |         |       | 123.6754  |         |        |         |             |                       |       |

Analysis of *N*-Cyclopropyl-3-hydroxyoctanamide (2e-OH) using SFC (Column AS-H, 10% *i*-PrOH, 2 mL, 10\_MPa).

Chromatogram of oxidized racemic borylation product:

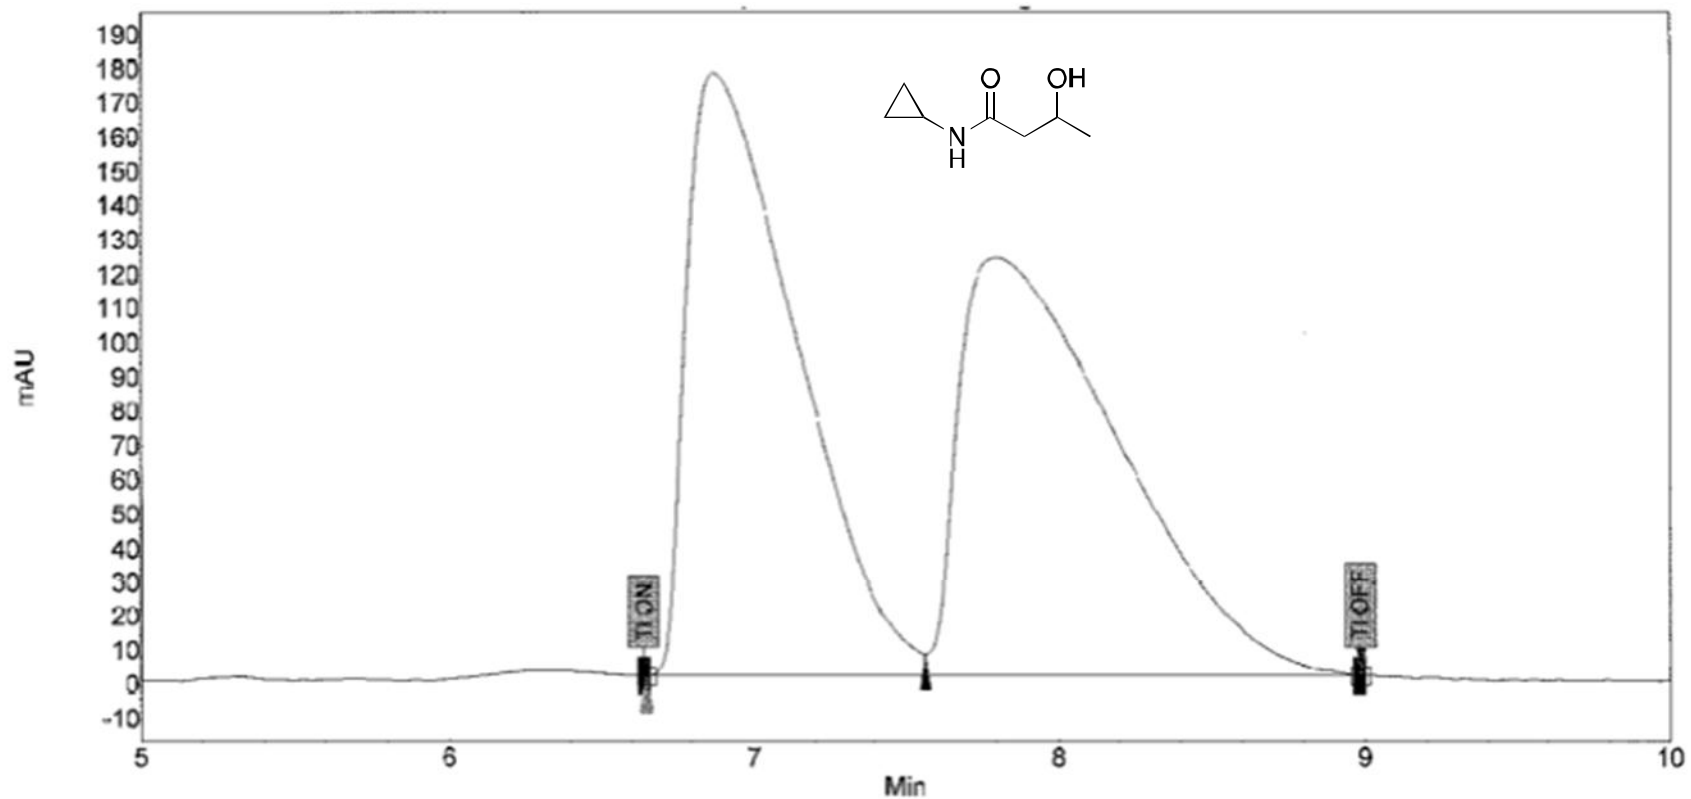

Peak results:

| Index | Name    | Time  | Area      | As. USP | Height | NTP USP | Selectivity | Signal to Noise Ratio | Width |
|-------|---------|-------|-----------|---------|--------|---------|-------------|-----------------------|-------|
|       |         | [Min] | [mAU*min] |         | [mAU]  |         |             |                       | [Min] |
| 1     | UNKNOWN | 6.87  | 73.0122   | 2.56    | 176.21 | 1592.38 | 0.00        | 89.9301               | 0.40  |
| 2     | UNKNOWN | 7.81  | 74.0925   | 2.39    | 122.32 | 1023.15 | 1.14        | 62.4249               | 0.59  |
| Total |         |       | 147.1046  |         |        |         |             |                       |       |

Analysis of (*R*)-*N*-Cyclopropyl-3-hydroxyoctanamide (2e-OH) using SFC (Column AS-H, 10% *i*-PrOH, 2 mL, 10\_MPa).

Chromatogram of oxidized enantioenriched borylation product from BBA:

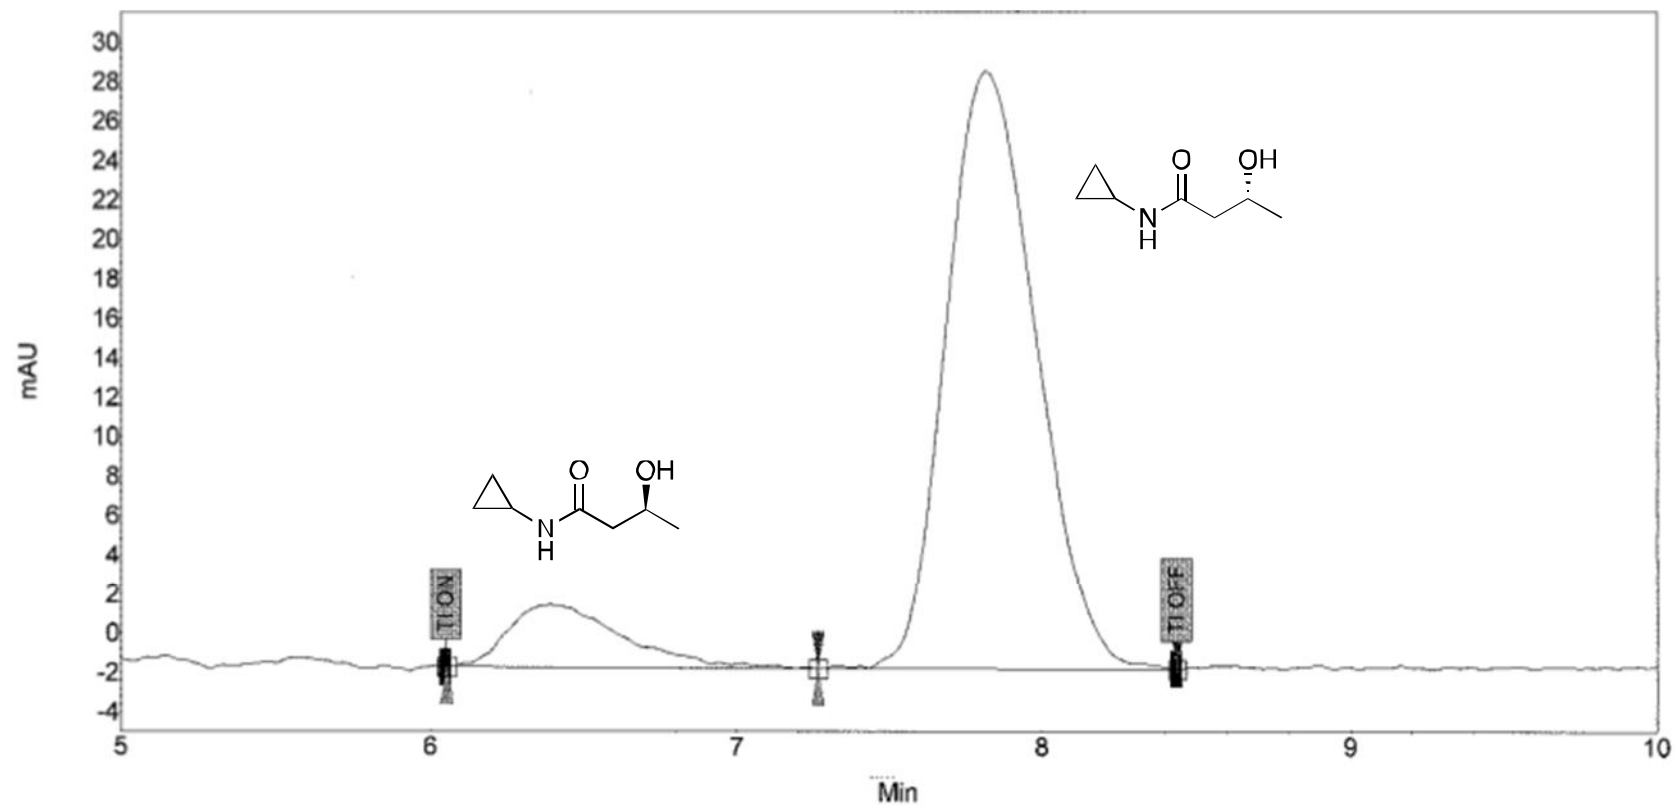

Peak results:

| Index | Name    | Start | Time  | End   | RT Offset | Quantity | Height | Area     | Area    |
|-------|---------|-------|-------|-------|-----------|----------|--------|----------|---------|
|       |         | [Min] | [Min] | [Min] | [Min]     | [% Area] | [μV]   | [μV.Min] | [%]     |
| 1     | UNKNOWN | 6.07  | 6.38  | 6.67  | 0.00      | 7.15     | 2.6    | 0.8      | 7.154   |
| 2     | UNKNOWN | 7.44  | 7.81  | 8.29  | 0.00      | 92.85    | 30.2   | 10.2     | 92.846  |
| Total |         |       |       |       |           | 100.00   | 32.7   | 11.0     | 100.000 |



Analysis of *N*-Cyclohexyl-3-hydroxypentanamide (2f-OH) using SFC (Column AS-H, 10% *i*-PrOH, 2 mL, 10\_MPa).

Chromatogram of oxidized racemic borylation product:

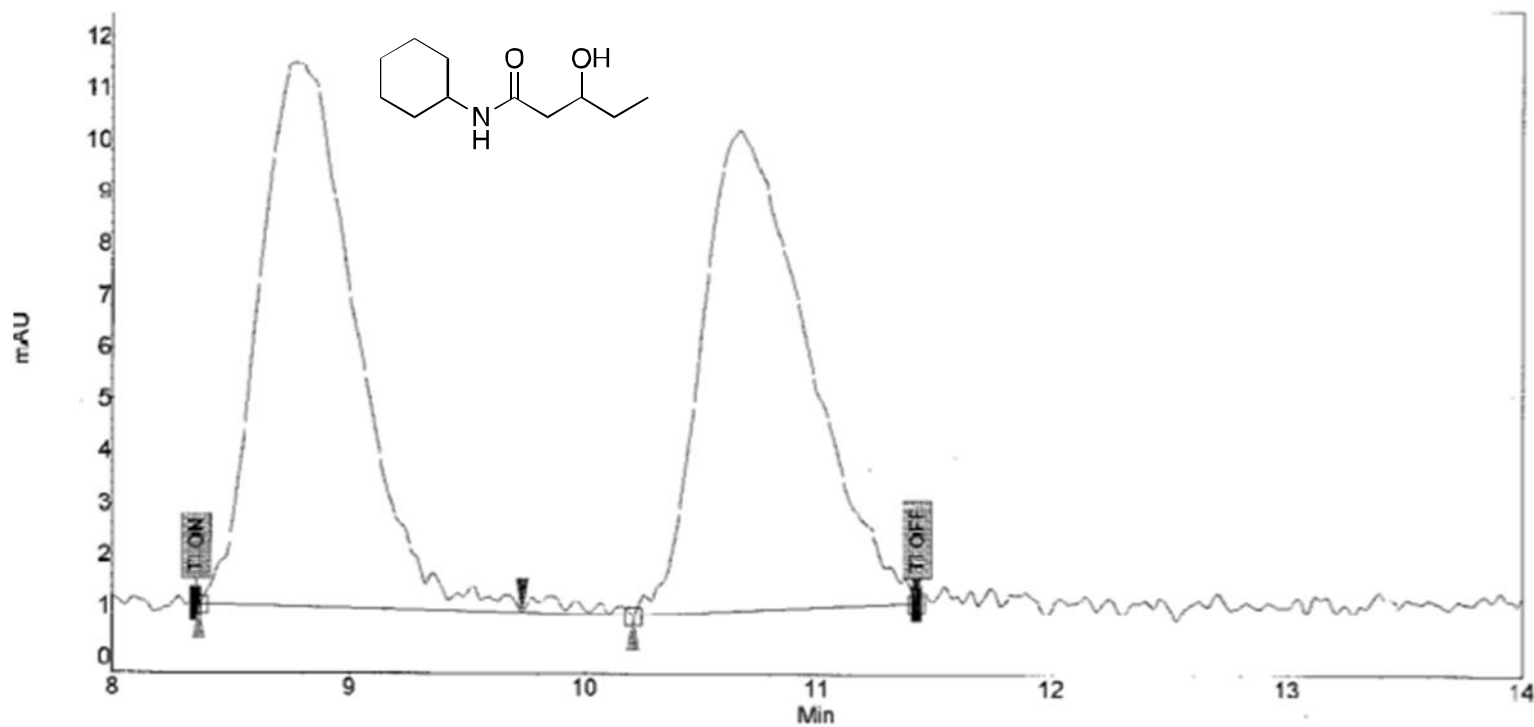

Peak results:

| Index | Name    | Time  | Area      | As: USP | Height | NTP USP | Selectivity | Signal to Noise Ratio | Width |
|-------|---------|-------|-----------|---------|--------|---------|-------------|-----------------------|-------|
|       |         | [Min] | [mAU*min] |         | [mAU]  |         |             |                       | [Min] |
| 1     | UNKNOWN | 8.77  | 4.9842    | 1.30    | 10.52  | 2783.63 | 0.00        | 3.9414                | 0.44  |
| 2     | UNKNOWN | 10.67 | 4.8831    | 1.55    | 9.29   | 2891.60 | 1.22        | 3.4816                | 0.49  |
| Total |         |       | 9.8672    |         |        |         |             |                       |       |

Analysis of (*R*)-*N*-Cyclohexyl-3-hydroxypentanamide (2f-OH) using SFC (Column AS-H, 10% *i*-PrOH, 2 mL, 10\_MPa).

Chromatogram of oxidized enantioenriched borylation product from BBA:

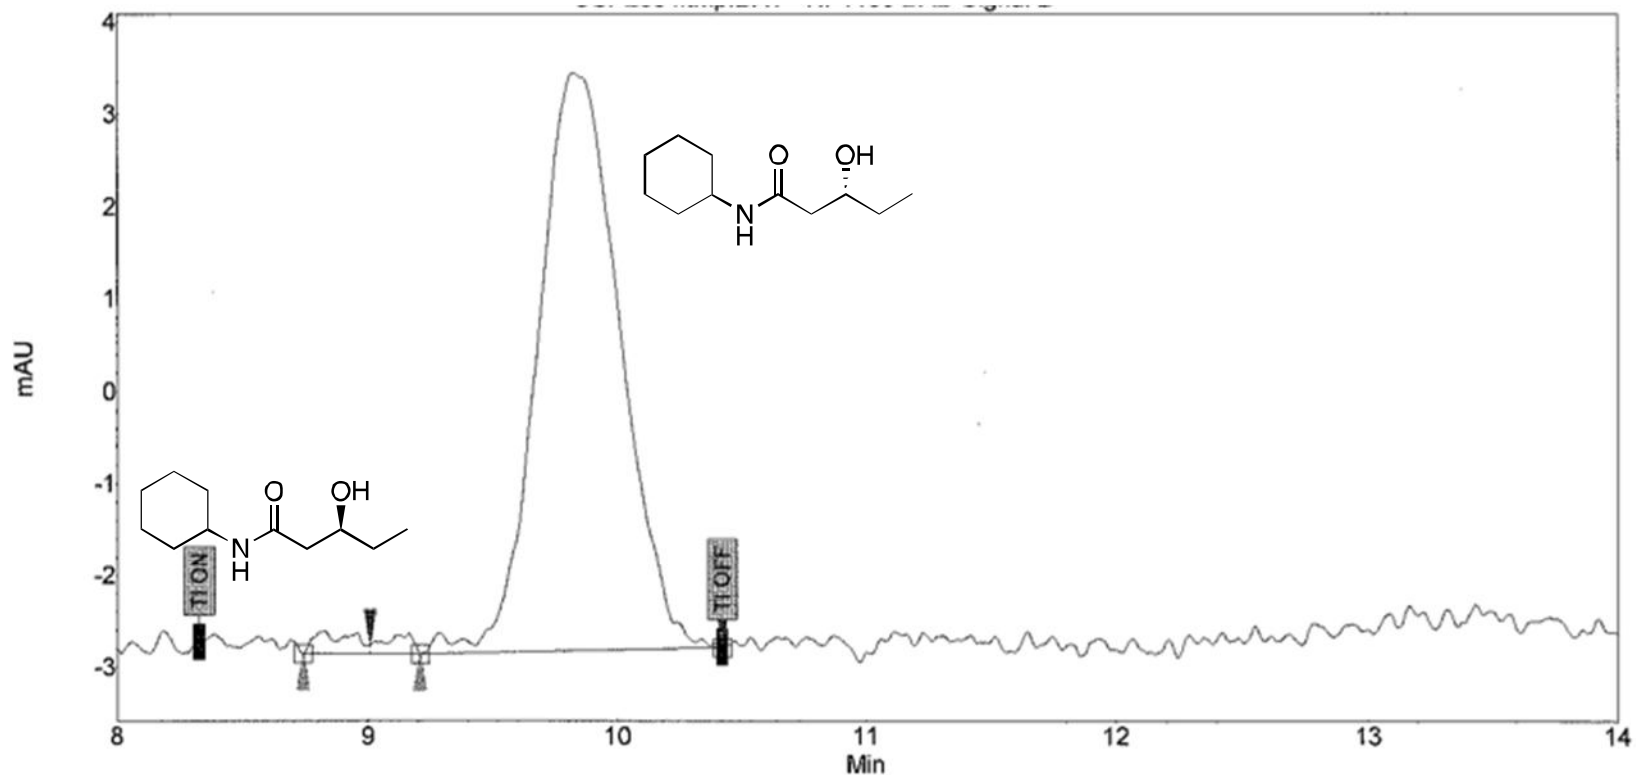

Peak results:

| Index | Name    | Start | Time  | End   | RT Offset | Quantity | Height     | Area           | Area    |
|-------|---------|-------|-------|-------|-----------|----------|------------|----------------|---------|
|       |         | [Min] | [Min] | [Min] | [Min]     | [% Area] | [ $\mu$ V] | [ $\mu$ V.Min] | [%]     |
| 1     | UNKNOWN | 8.75  | 8.83  | 9.01  | 0.00      | 1.69     | 0.2        | 0.0            | 1.689   |
| 2     | UNKNOWN | 9.21  | 9.82  | 10.42 | 0.00      | 98.31    | 6.3        | 2.4            | 98.311  |
| Total |         |       |       |       |           | 100.00   | 6.5        | 2.4            | 100.000 |

Analysis of 3-Hydroxy-1-(piperidin-1-yl)butan-1-one (2g-OH) using SFC (Column AD-H, 10% *i*-PrOH, 2 mL, 10\_MPa).

Chromatogram of oxidized racemic borylation product:

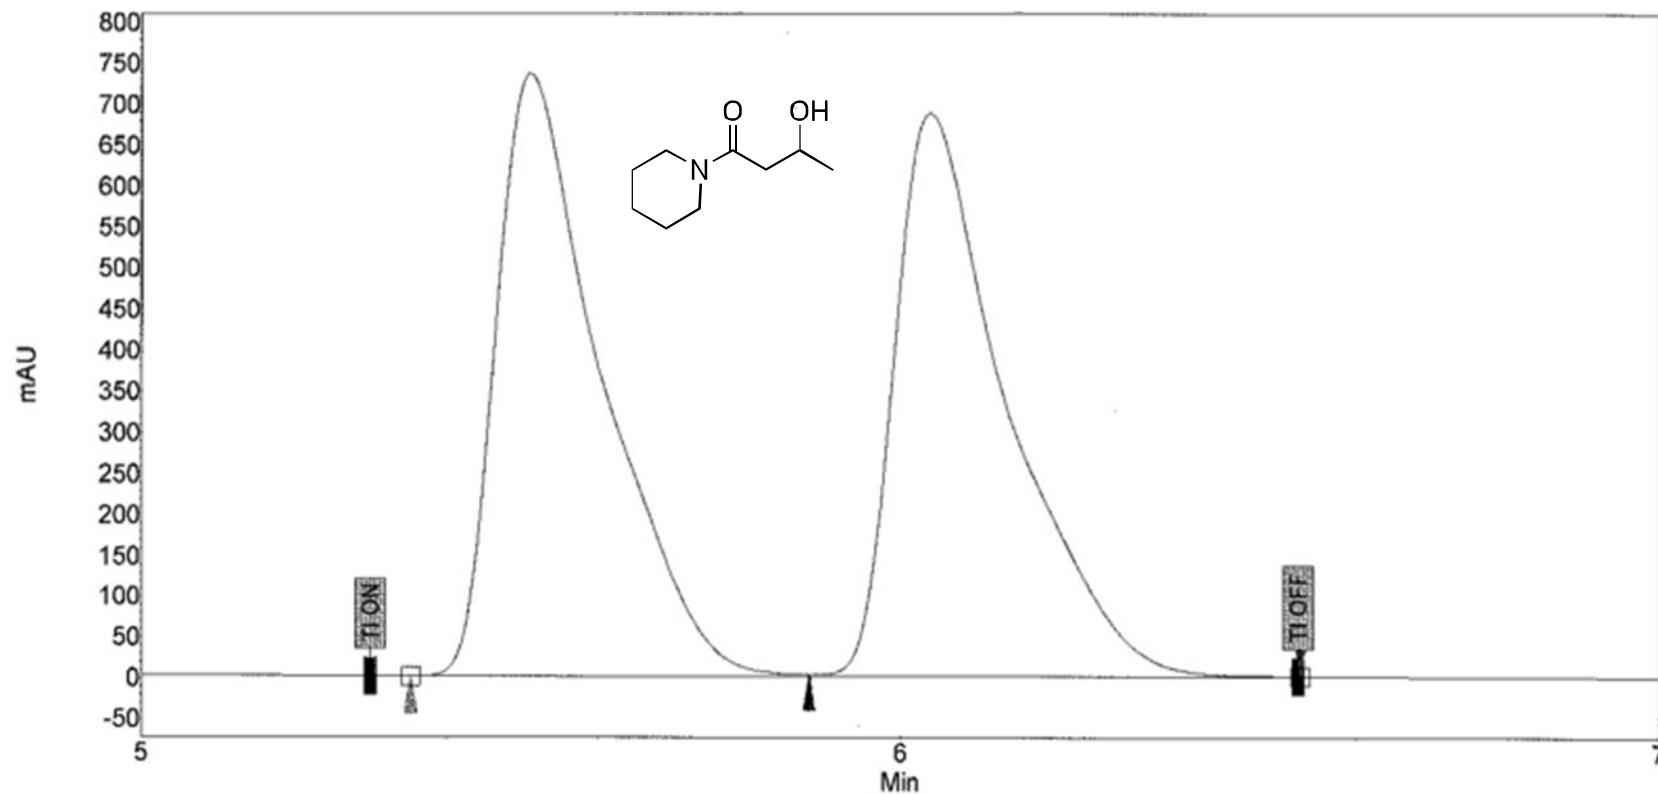

Peak results:

| Index | Name    | Time  | Area      | As USP | Height | NTP USP | Selectivity | Signal to Noise Ratio | Width |
|-------|---------|-------|-----------|--------|--------|---------|-------------|-----------------------|-------|
|       |         | [Min] | [mAU*min] |        | [mAU]  |         |             |                       | [Min] |
| 1     | UNKNOWN | 5.51  | 118.5023  | 1.87   | 735.57 | 8410.97 | 0.00        | 410.9275              | 0.14  |
| 2     | UNKNOWN | 6.04  | 119.1272  | 1.88   | 688.91 | 9066.71 | 1.10        | 384.8615              | 0.15  |
| Total |         |       | 237.6294  |        |        |         |             |                       |       |

Analysis of (*R*)-3-Hydroxy-1-(piperidin-1-yl)butan-1-one (2g-OH) using SFC (Column AD-H, 10% *i*-PrOH, 2 mL, 10\_MPa).

Chromatogram of oxidized enantioenriched borylation product:

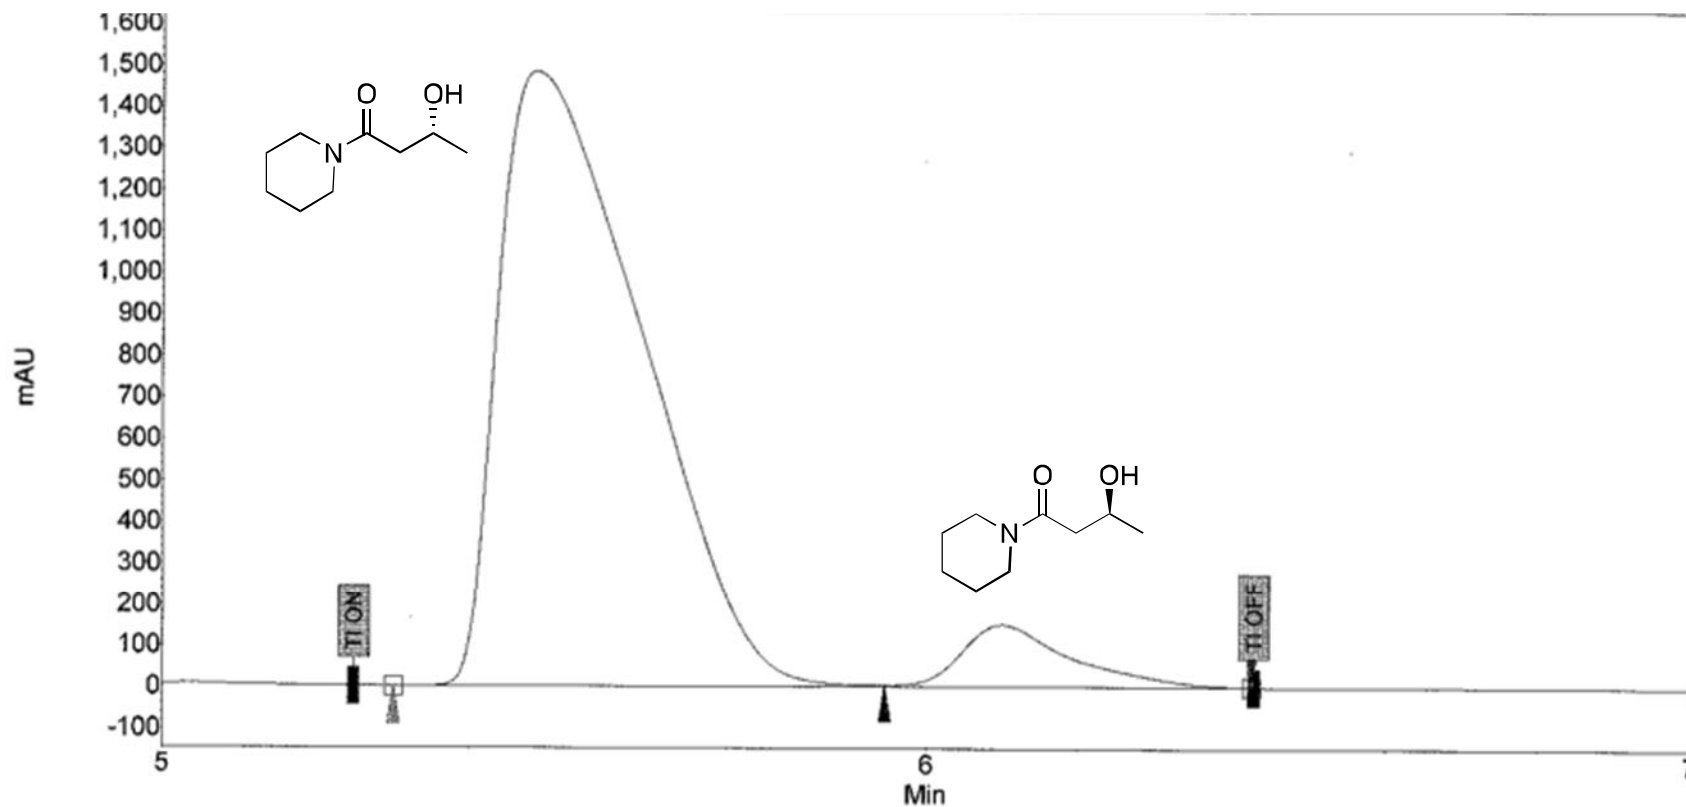

Peak results:

| Index | Name    | Time  | Area      | As. USP | Height  | NTP USP  | Selectivity | Signal to Noise Ratio | Width |
|-------|---------|-------|-----------|---------|---------|----------|-------------|-----------------------|-------|
|       |         | [Min] | [mAU*min] |         | [mAU]   |          |             |                       | [Min] |
| 1     | UNKNOWN | 5.49  | 321.8286  | 2.11    | 1482.74 | 3660.79  | 0.00        | 389.6508              | 0.21  |
| 2     | UNKNOWN | 6.10  | 24.8640   | 1.59    | 148.97  | 10031.33 | 1.11        | 39.1474               | 0.14  |
| Total |         |       | 346.6926  |         |         |          |             |                       |       |

Analysis of 3-Hydroxy-1-morpholinobutan-1-one (2h-OH) using SFC (Column AD-H, 10% *i*-PrOH, 2 mL, 10\_MPa).

Chromatogram of oxidized racemic borylation product:

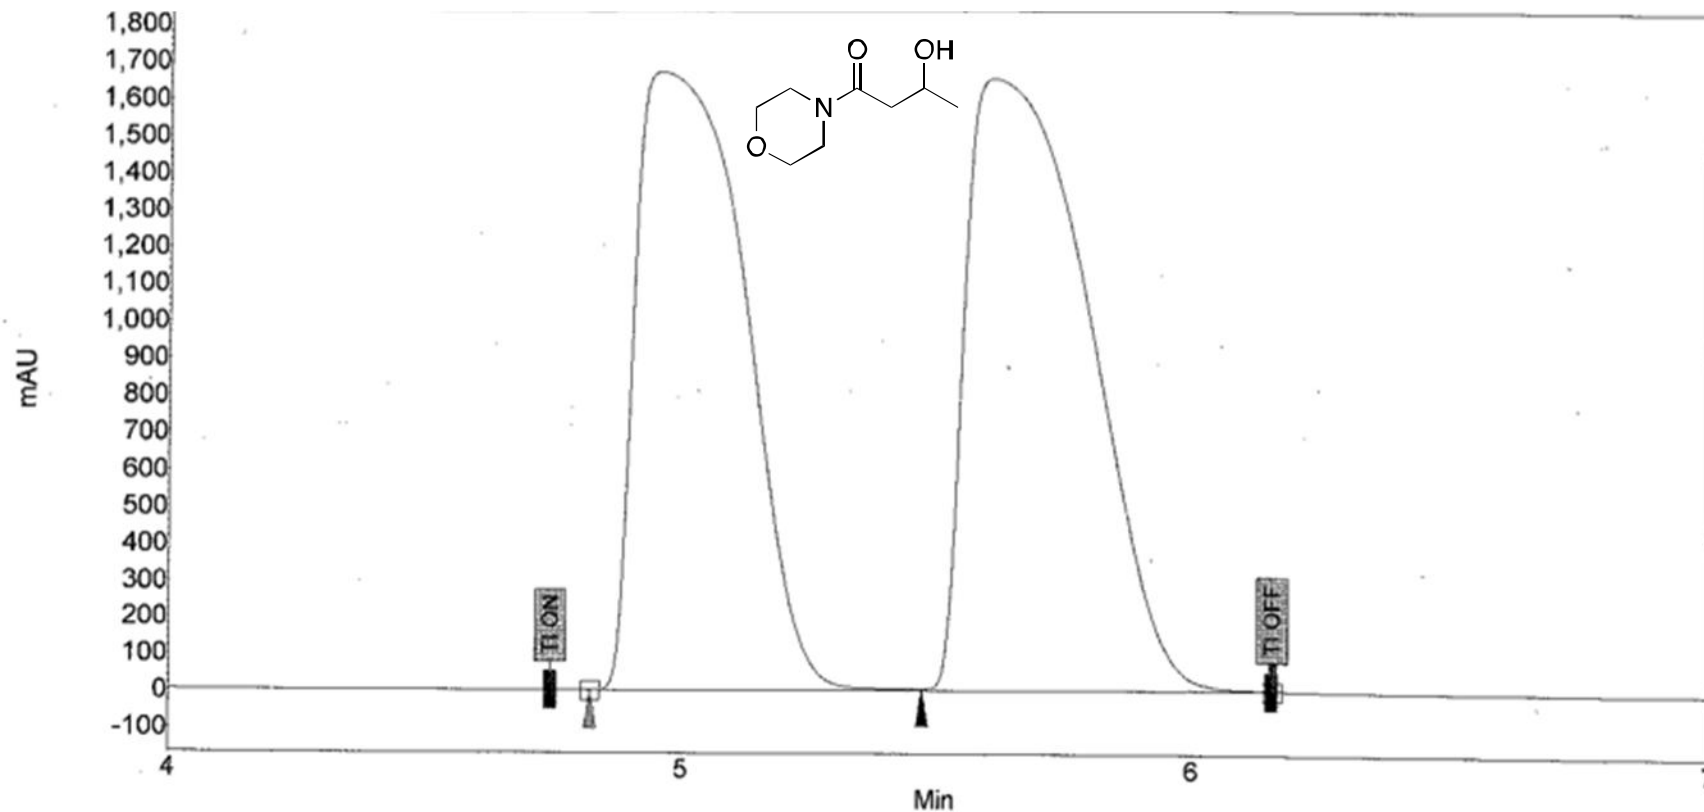

Peak results:

| Index | Name    | Time<br>[Min] | Area<br>[mAU*min] | As. USP | Height<br>[mAU] | NTP USP | Selectivity | Signal to Noise Ratio | Width<br>[Min] |
|-------|---------|---------------|-------------------|---------|-----------------|---------|-------------|-----------------------|----------------|
| 1     | UNKNOWN | 4.96          | 416.2065          | 2.10    | 1670.06         | 3188.72 | 0.00        | 284.6689              | 0.25           |
| 2     | UNKNOWN | 5.61          | 454.4243          | 2.31    | 1651.69         | 3052.69 | 1.13        | 281.5370              | 0.28           |
| Total |         |               | 870.6308          |         |                 |         |             |                       |                |

Analysis of (*R*)-3-Hydroxy-1-morpholinobutan-1-one (2h-OH) using SFC (Column AD-H, 10% *i*-PrOH, 2 mL, 10\_MPa).

Chromatogram of oxidized enantioenriched borylation product from BBA:

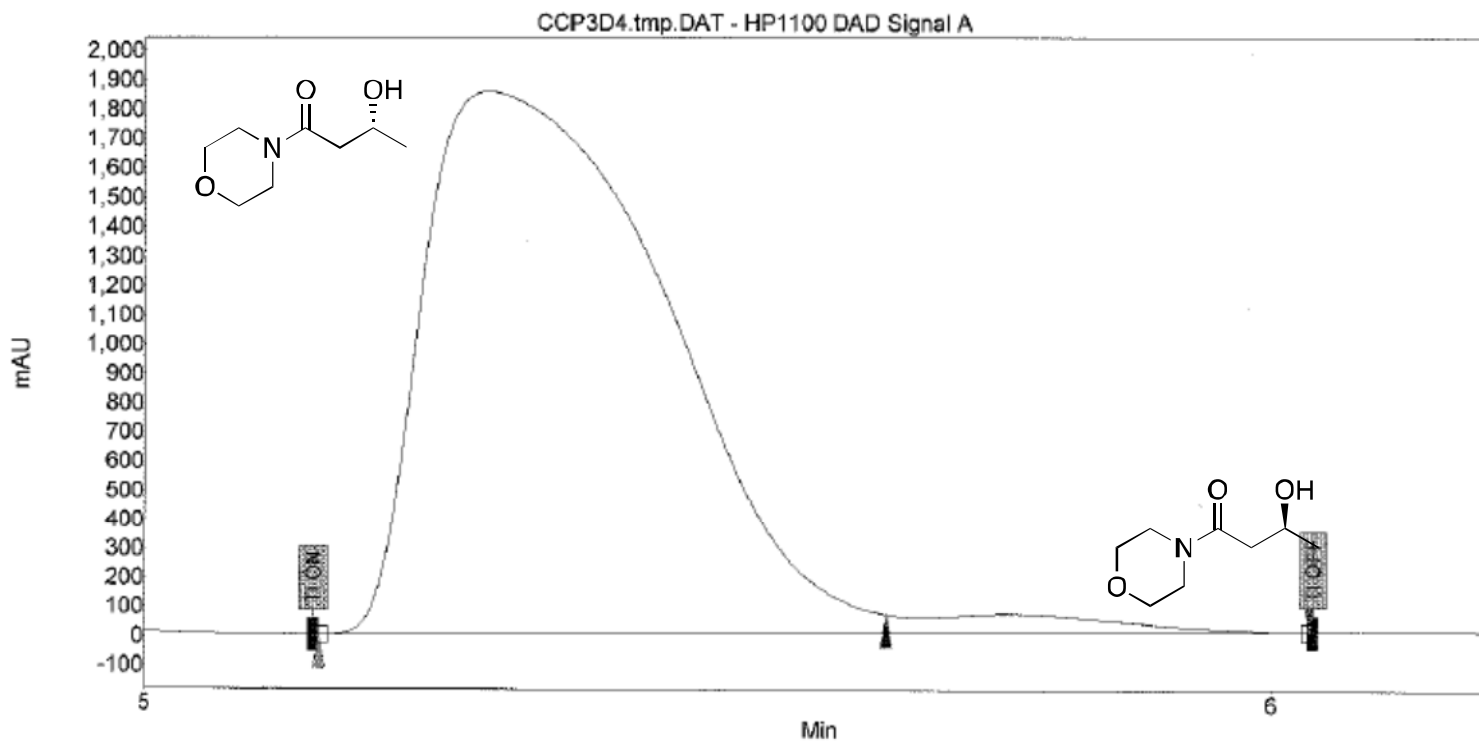

Peak results:

| Index | Name    | Time  | Area      | As USP | Height  | NTP USP | Selectivity | Signal to Noise Ratio | Width |
|-------|---------|-------|-----------|--------|---------|---------|-------------|-----------------------|-------|
|       |         | [Min] | [mAU*min] |        | [mAU]   |         |             |                       | [Min] |
| 1     | UNKNOWN | 5.30  | 462.1349  | 2.18   | 1852.63 | 3255.92 | 0.00        | 7547.0674             | 0.25  |
| 2     | UNKNOWN | 5.77  | 14.1444   | 1.75   | 66.25   | 917.78  | 1.09        | 269.8670              | 0.23  |
| Total |         |       | 476.2793  |        |         |         |             |                       |       |

Analysis of (*R*)-3-Hydroxy-1-morpholinobutan-1-one (2h-OH) using SFC (Column AD-H, 10% *i*-PrOH, 2 mL, 10\_MPa).

Chromatogram of oxidized enantioenriched borylation product from tetrakis(dimethylamino)diboron:

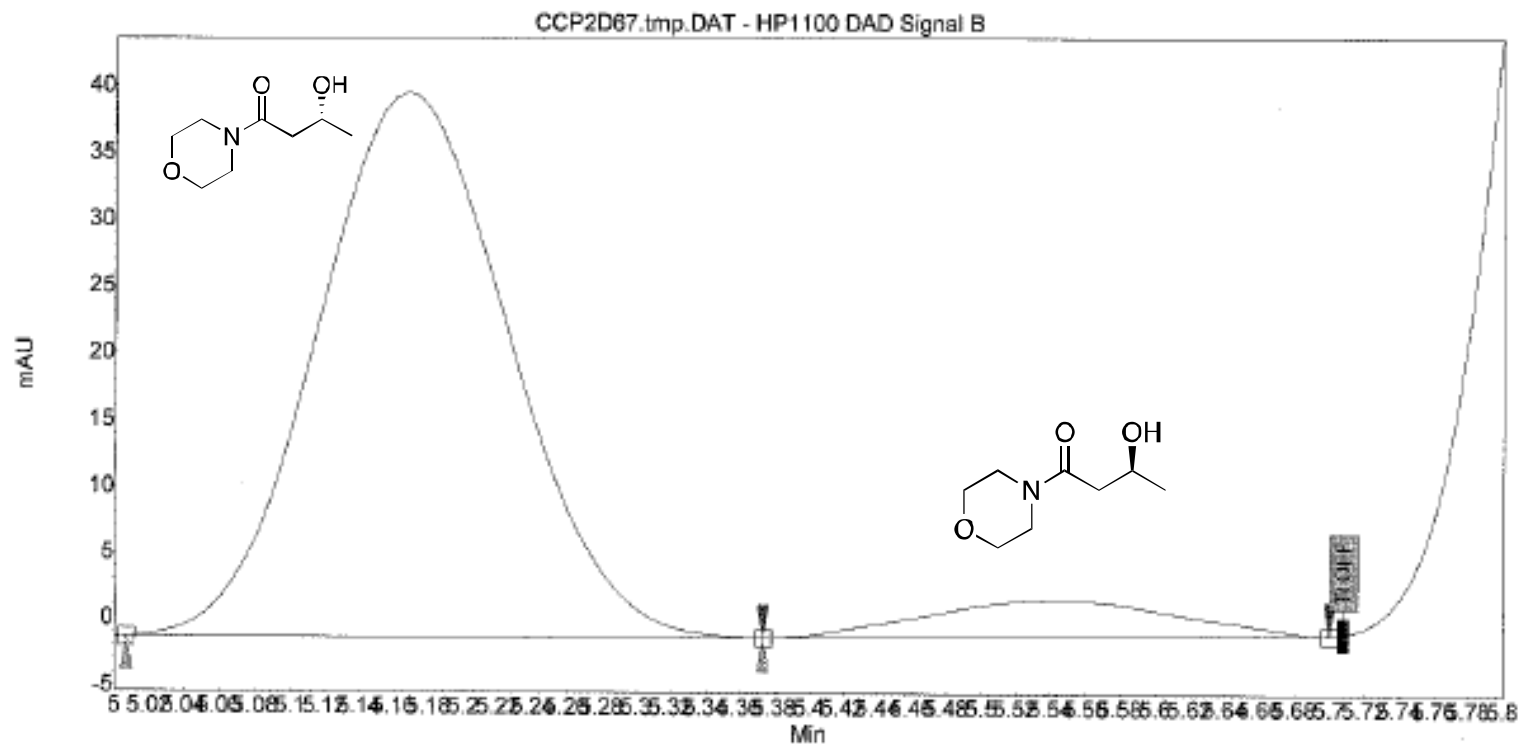

Peak results:

| Index | Name    | Start Time [Min] | Time [Min] | End [Min] | RT Offset [Min] | Quantity [% Area] | Height [μV] | Area [μV.Min] | Area [%] |
|-------|---------|------------------|------------|-----------|-----------------|-------------------|-------------|---------------|----------|
| 1     | UNKNOWN | 5.01             | 5.17       | 5.37      | 0.00            | 91.82             | 40.8        | 5.2           | 91.818   |
| 2     | UNKNOWN | 5.37             | 5.54       | 5.70      | 0.00            | 8.18              | 2.7         | 0.5           | 8.182    |
| Total |         |                  |            |           |                 | 100.00            | 43.5        | 5.7           | 100.000  |

Analysis of *N*-Ethyl-3-hydroxy-*N*-(*o*-tolyl)butanamide (2j-OH) using SFC (Column AD-H, 10% *i*-PrOH:CH<sub>3</sub>CN (85:15), 2 mL, 10\_MPa).

Chromatogram of oxidized racemic borylation product:

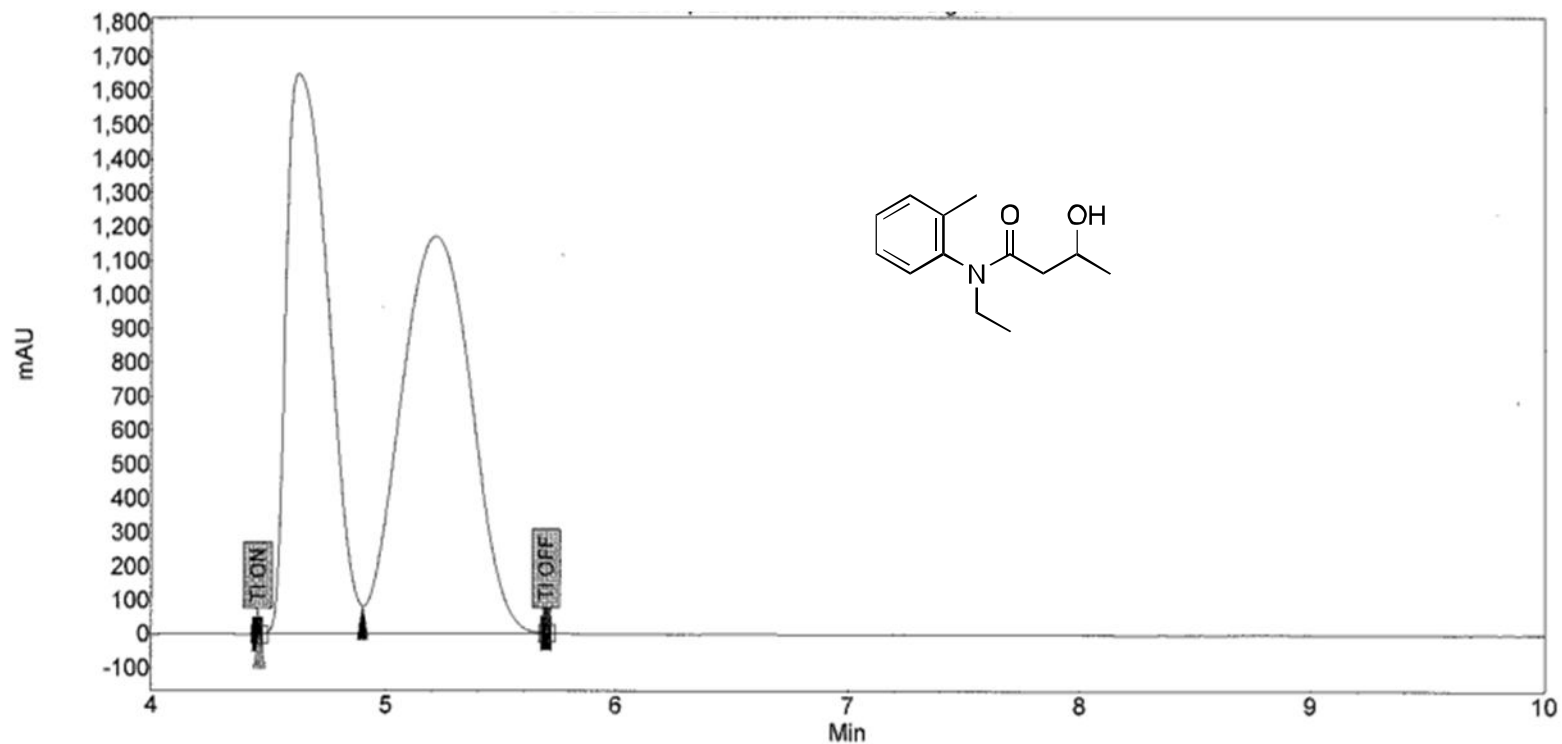

Peak results:

| Index | Name    | Time  | Area      | As. USP | Height  | NTP USP | Selectivity | Signal to Noise Ratio | Width |
|-------|---------|-------|-----------|---------|---------|---------|-------------|-----------------------|-------|
|       |         | [Min] | [mAU*min] |         | [mAU]   |         |             |                       | [Min] |
| 1     | UNKNOWN | 4.63  | 340.9325  | 1.80    | 1647.82 | 3509.20 | 0.00        | 3334.0082             | 0.20  |
| 2     | UNKNOWN | 5.22  | 413.7077  | 1.01    | 1169.34 | 1397.68 | 1.13        | 2365.9091             | 0.35  |
| Total |         |       | 754.6402  |         |         |         |             |                       |       |



Analysis of (*R*)-*N*-Ethyl-3-hydroxy-*N*-(*o*-tolyl)butanamide (2j-OH) using SFC (Column AD-H, 10% *i*-PrOH:CH<sub>3</sub>CN (85:15), 2 mL, 10\_MPa).

Chromatogram of oxidized enantioenriched borylation product from BBA:

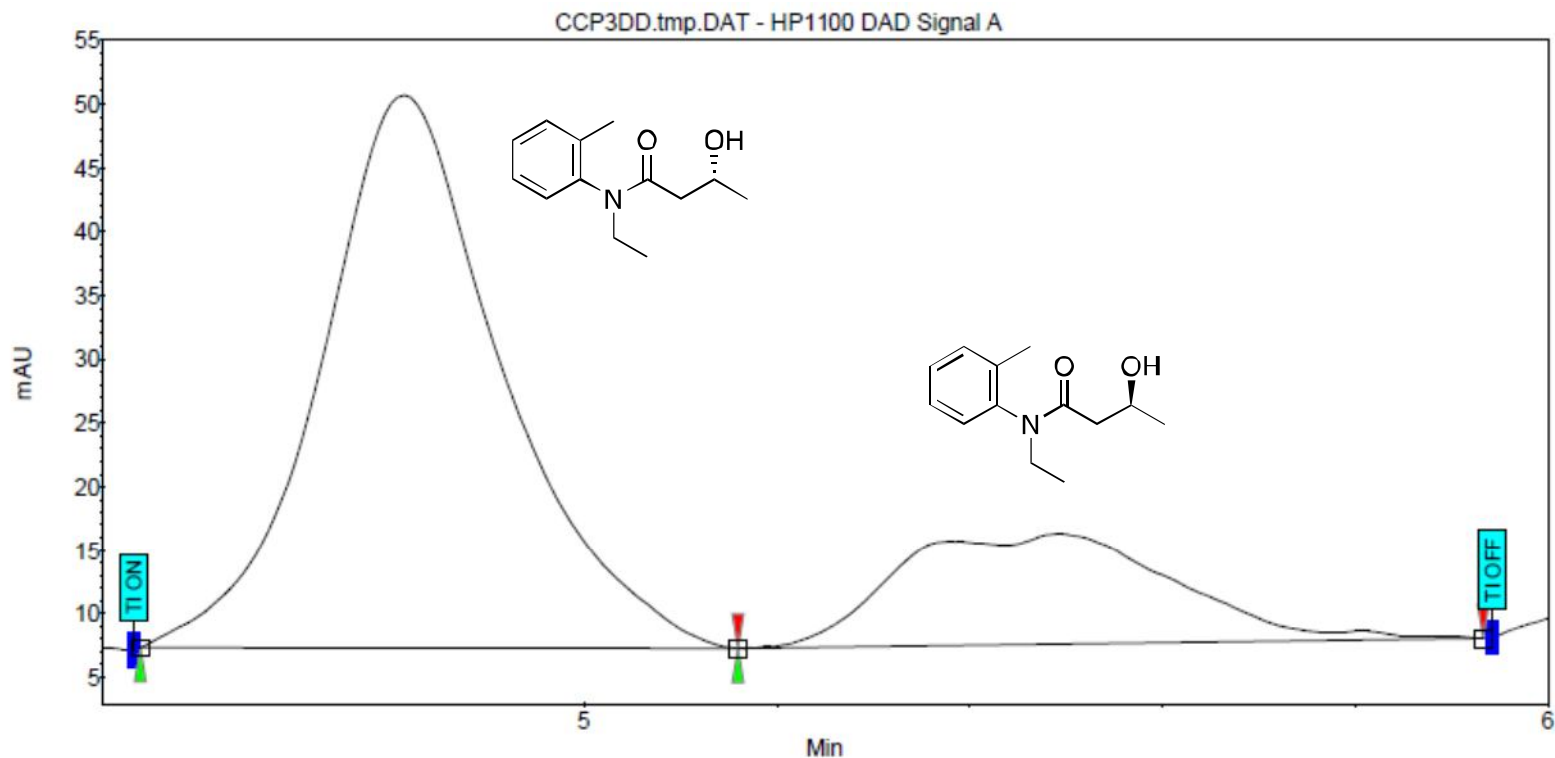

Peak results:

| Index | Name    | Time  | Area      | As. USP | Height | NTP USP | Selectivity | Signal to Noise Ratio | Width |
|-------|---------|-------|-----------|---------|--------|---------|-------------|-----------------------|-------|
|       |         | [Min] | [mAU*min] |         | [mAU]  |         |             |                       | [Min] |
| 1     | UNKNOWN | 4.81  | 9.4756    | 1.12    | 43.36  | 3405.49 | 0.00        | 4.4163                | 0.19  |
| 2     | UNKNOWN | 5.49  | 2.8917    | 1.34    | 8.72   | 2281.19 | 1.14        | 0.8879                | 0.32  |
| Total |         |       | 12.3673   |         |        |         |             |                       |       |

Analysis of (*R*)-*N*-Ethyl-3-hydroxy-*N*-(*o*-tolyl)butanamide (2j-OH) using SFC (Column AD-H, 10% *i*-PrOH:CH<sub>3</sub>CN (85:15), 2 mL, 10\_MPa).

Chromatogram of oxidized enantioenriched borylation product from tetrakis(dimethylamino)diboron:

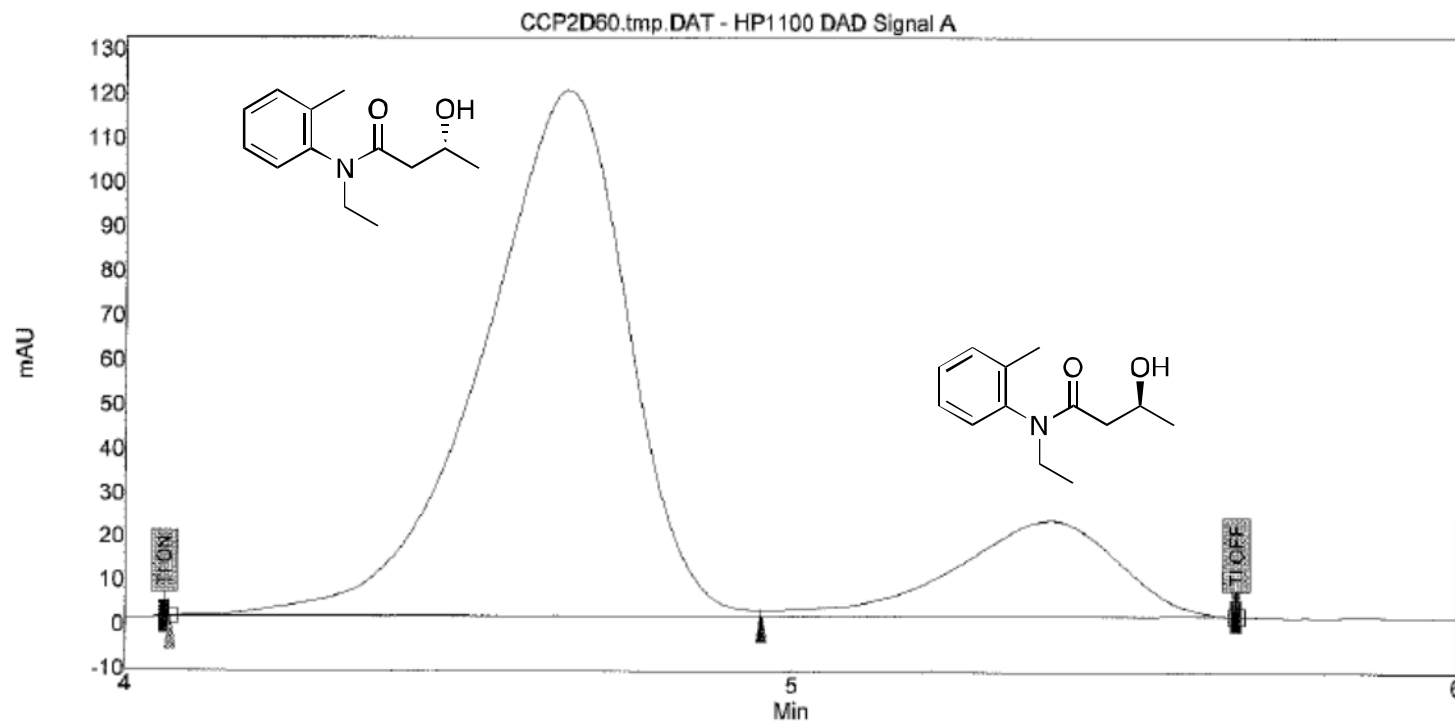

Peak results:

| Index | Name    | Time  | Area      | As. USP | Height | NTP USP | Selectivity | Signal to Noise Ratio | Width |
|-------|---------|-------|-----------|---------|--------|---------|-------------|-----------------------|-------|
|       |         | [Min] | [mAU*min] |         | [mAU]  |         |             |                       | [Min] |
| 1     | UNKNOWN | 4.66  | 29.9523   | 0.82    | 118.81 | 2179.57 | 0.00        | 1.4835                | 0.23  |
| 2     | UNKNOWN | 5.39  | 6.0714    | 0.75    | 21.58  | 2371.15 | 1.16        | 0.2694                | 0.26  |
| Total |         |       | 36.0237   |         |        |         |             |                       |       |

Analysis of 3-Hydroxy-*N,N*-dimethylbutanamide (2k-OH) using SFC (Column R,R-Whelk, 10% *i*-PrOH, 2 mL, 10\_MPa).

Chromatogram of oxidized racemic borylation product:

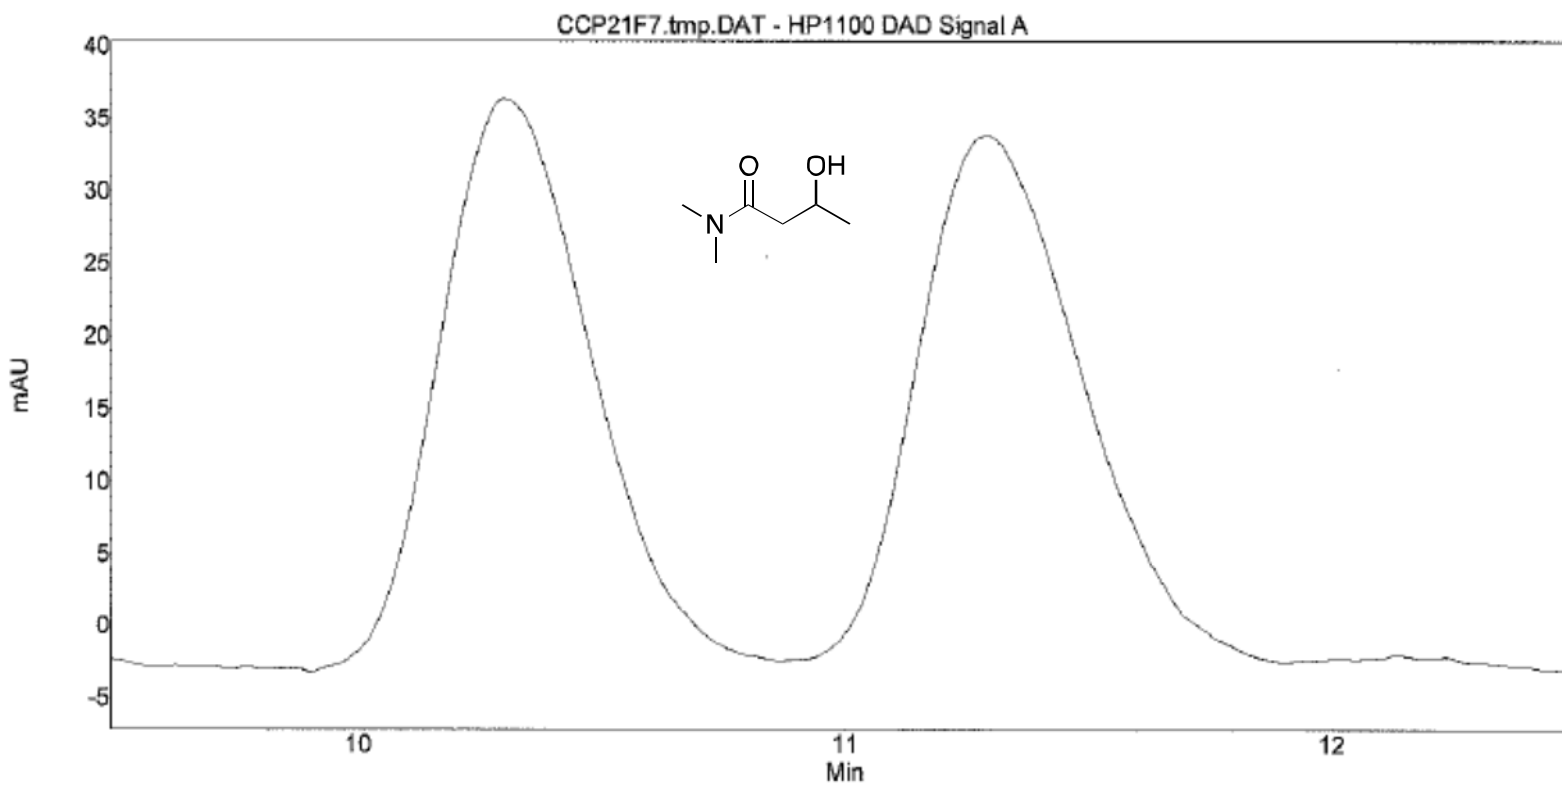

Peak results:

| Index | Name    | Time  | Area      | As. USP | Height | NTP USP | Selectivity | Signal to Noise Ratio | Width |
|-------|---------|-------|-----------|---------|--------|---------|-------------|-----------------------|-------|
|       |         | [Min] | [mAU*min] |         | [mAU]  |         |             |                       | [Min] |
| 1     | UNKNOWN | 10.30 | 14.2926   | 1.27    | 39.45  | 5174.57 | 0.00        | 80.5924               | 0.34  |
| 2     | UNKNOWN | 11.29 | 14.3339   | 1.28    | 36.53  | 5252.76 | 1.10        | 74.6179               | 0.37  |
| Total |         |       | 28.6265   |         |        |         |             |                       |       |

Analysis of (*R*)-3-Hydroxy-*N,N*-dimethylbutanamide (2k-OH) using SFC (Column R,R-Whelk, 10% *i*-PrOH, 2 mL, 10\_MPa).

Chromatogram of oxidized enantioenriched borylation product from BBA:

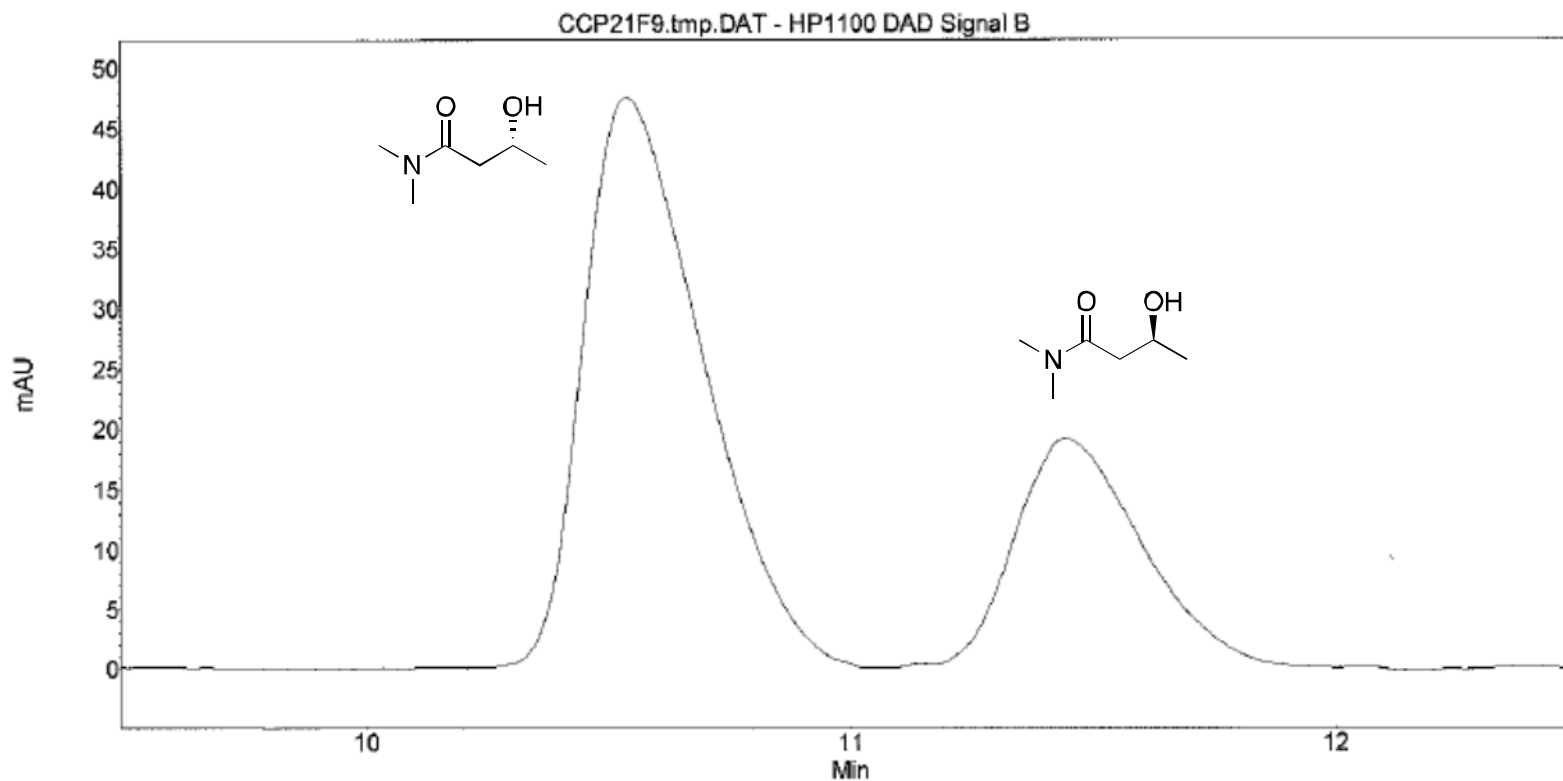

Peak results:

| Index | Name    | Start | Time  | End   | RT Offset | Quantity | Height     | Area           | Area    |
|-------|---------|-------|-------|-------|-----------|----------|------------|----------------|---------|
|       |         | [Min] | [Min] | [Min] | [Min]     | [% Area] | [ $\mu$ V] | [ $\mu$ V Min] | [%]     |
| 1     | UNKNOWN | 10.07 | 10.54 | 11.06 | 0.00      | 69.36    | 47.6       | 13.7           | 69.355  |
| 2     | UNKNOWN | 11.06 | 11.45 | 12.13 | 0.00      | 30.64    | 19.3       | 6.0            | 30.645  |
| Total |         |       |       |       |           | 100.00   | 66.9       | 19.7           | 100.000 |

Analysis of (*R*)-3-Hydroxy-*N,N*-dimethylbutanamide (2k-OH) using SFC (Column R,R-Whelk, 10% *i*-PrOH, 2 mL, 10\_MPa).

Chromatogram of oxidized enantioenriched borylation product from tetrakis(dimethylamino)diboron:

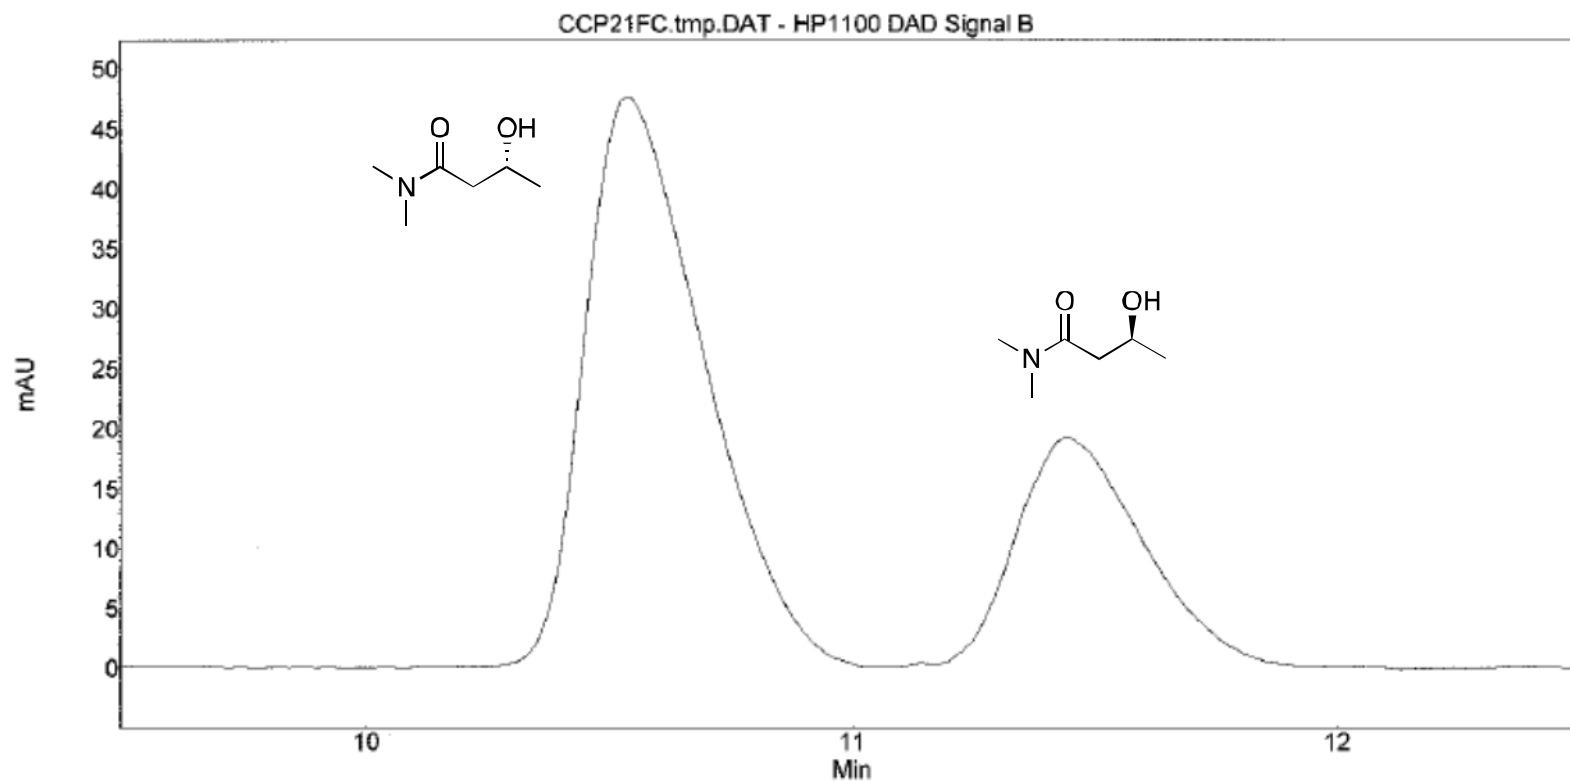

Peak results:

| Index | Name    | Start | Time  | End   | RT Offset | Quantity | Height     | Area           | Area    |
|-------|---------|-------|-------|-------|-----------|----------|------------|----------------|---------|
|       |         | [Min] | [Min] | [Min] | [Min]     | [% Area] | [ $\mu$ V] | [ $\mu$ V.Min] | [%]     |
| 1     | UNKNOWN | 10.37 | 10.54 | 11.03 | 0.00      | 70.29    | 44.9       | 12.3           | 70.295  |
| 2     | UNKNOWN | 11.10 | 11.44 | 11.79 | 0.00      | 29.71    | 18.3       | 5.2            | 29.705  |
| Total |         |       |       |       |           | 100.00   | 63.3       | 17.5           | 100.000 |

Analysis of *N,N*-Dibenzyl-3-hydroxybutanamide (2l-OH) using SFC (Column OD-H, 10% *i*-PrOH, 2 mL, 10\_MPa).

Chromatogram of oxidized racemic borylation product:

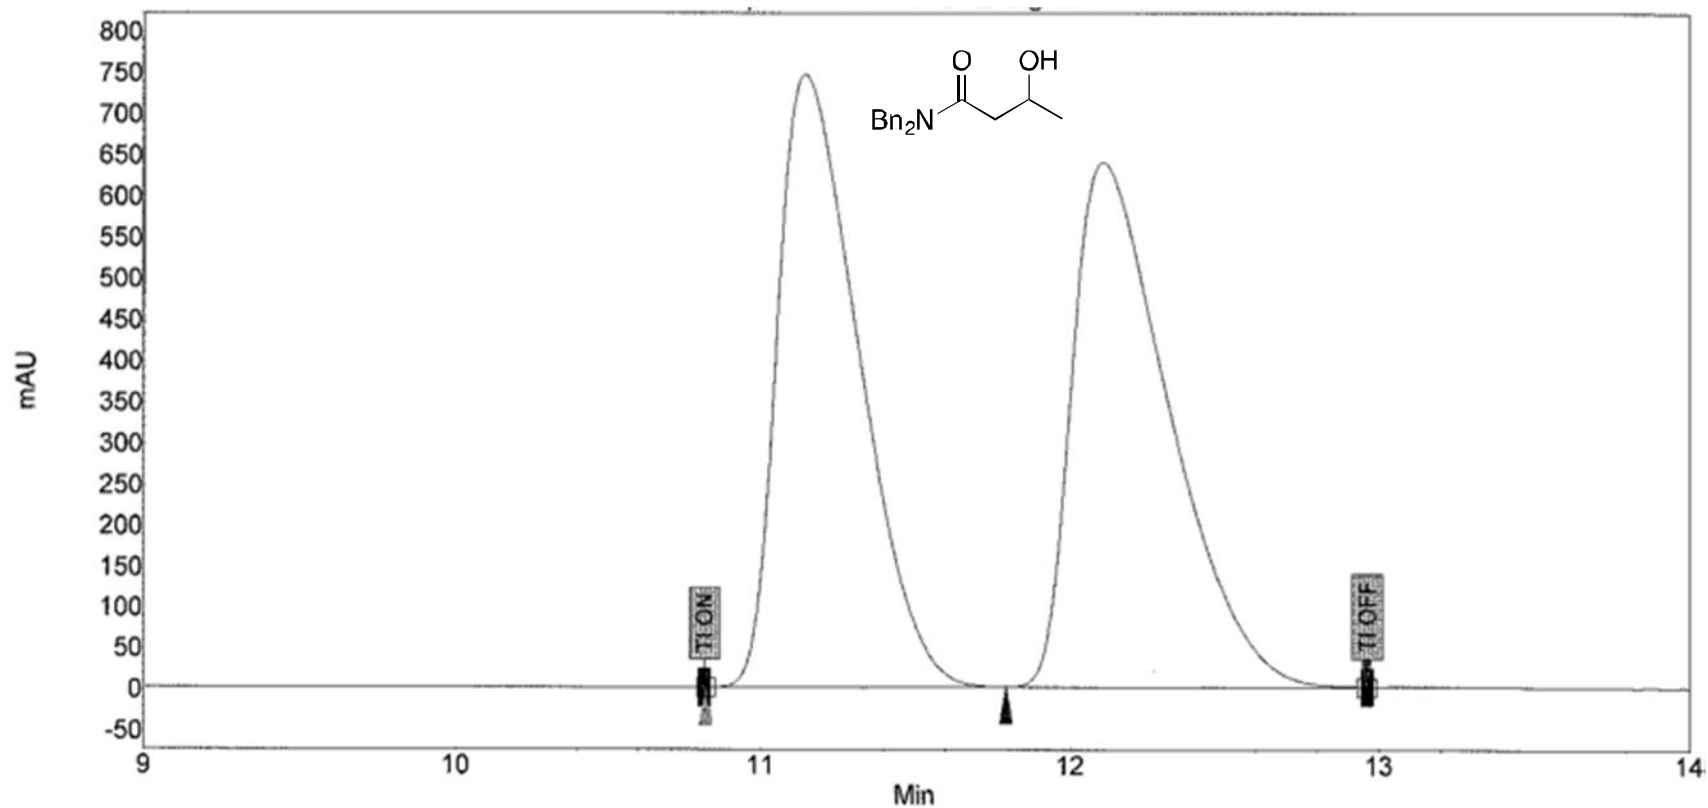

Peak results:

| Index | Name    | Time  | Area      | As. USP | Height | NTP USP | Selectivity | Signal to Noise Ratio | Width |
|-------|---------|-------|-----------|---------|--------|---------|-------------|-----------------------|-------|
|       |         | [Min] | [mAU*min] |         | [mAU]  |         |             |                       | [Min] |
| 1     | UNKNOWN | 11.15 | 228.0478  | 1.59    | 745.88 | 8004.45 | 0.00        | 138.3408              | 0.29  |
| 2     | UNKNOWN | 12.11 | 232.4902  | 1.82    | 639.03 | 6749.75 | 1.09        | 118.5221              | 0.34  |
| Total |         |       | 460.5379  |         |        |         |             |                       |       |

Analysis of (*R*)-*N,N*-Dibenzyl-3-hydroxybutanamide (2l-OH) using SFC (Column OD-H, 10% *i*-PrOH, 2 mL, 10\_MPa).

Chromatogram of oxidized enantioenriched borylation product from BBA:

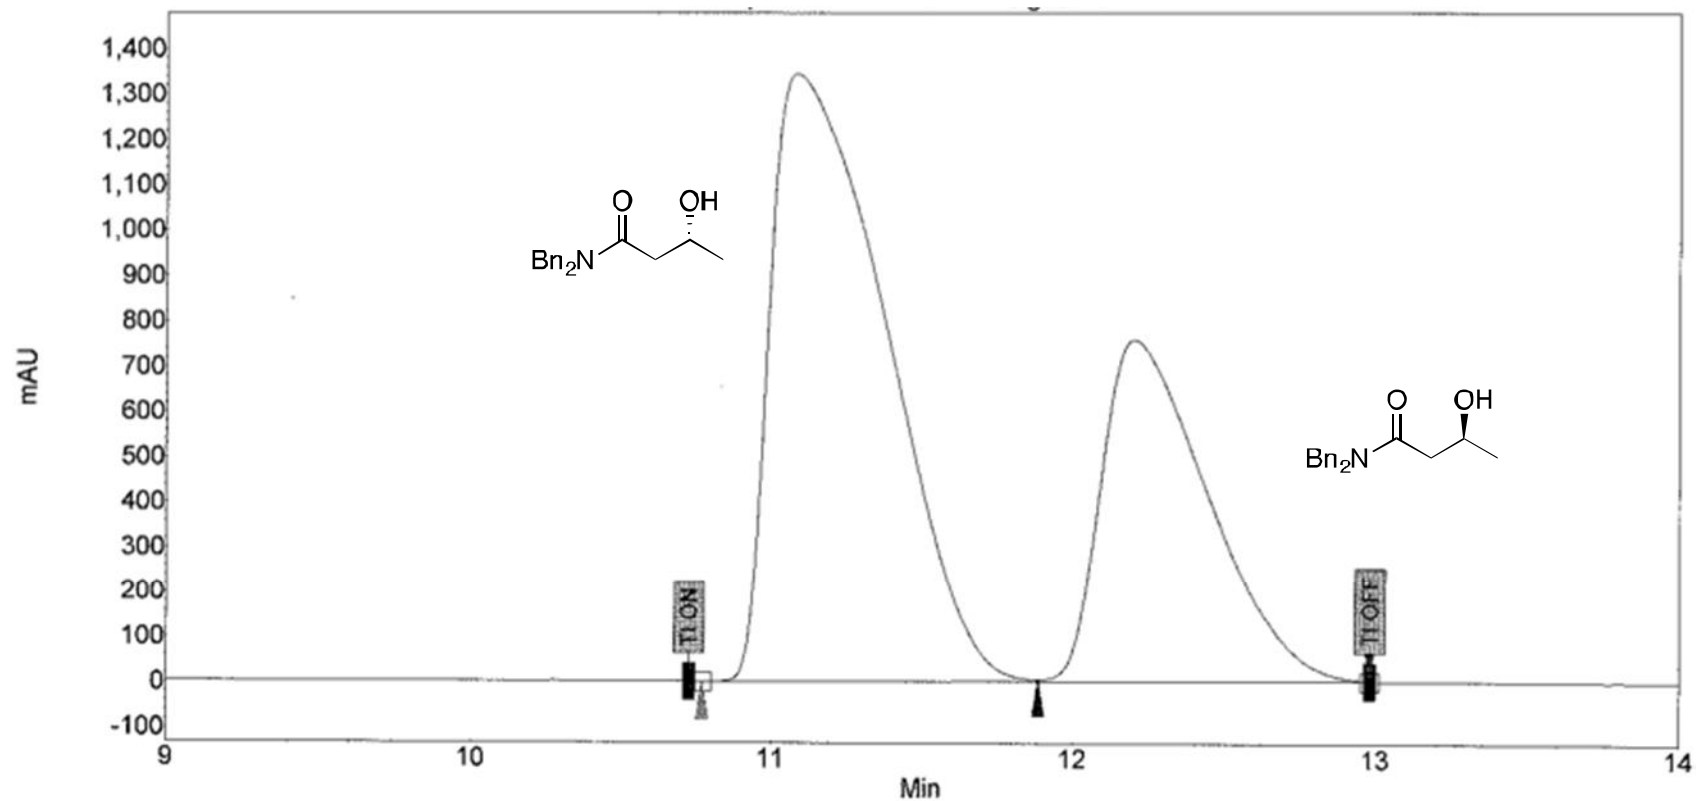

Peak results:

| Index | Name    | Time<br>[Min] | Area<br>[mAU*min] | As. USP | Height<br>[mAU] | NTP USP | Selectivity | Signal to Noise Ratio | Width<br>[Min] |
|-------|---------|---------------|-------------------|---------|-----------------|---------|-------------|-----------------------|----------------|
| 1     | UNKNOWN | 11.09         | 591.4202          | 2.29    | 1341.01         | 3865.16 | 0.00        | 192.7929              | 0.44           |
| 2     | UNKNOWN | 12.20         | 307.8245          | 1.82    | 754.06          | 5341.49 | 1.10        | 108.4087              | 0.39           |
| Total |         |               | 899.2447          |         |                 |         |             |                       |                |

Analysis of (*R*)-*N,N*-Dibenzyl-3-hydroxybutanamide (2l-OH) using SFC (Column OD-H, 10% *i*-PrOH, 2 mL, 10\_MPa).

Chromatogram of oxidized enantioenriched borylation product from tetrakis(dimethylamino)diboron:

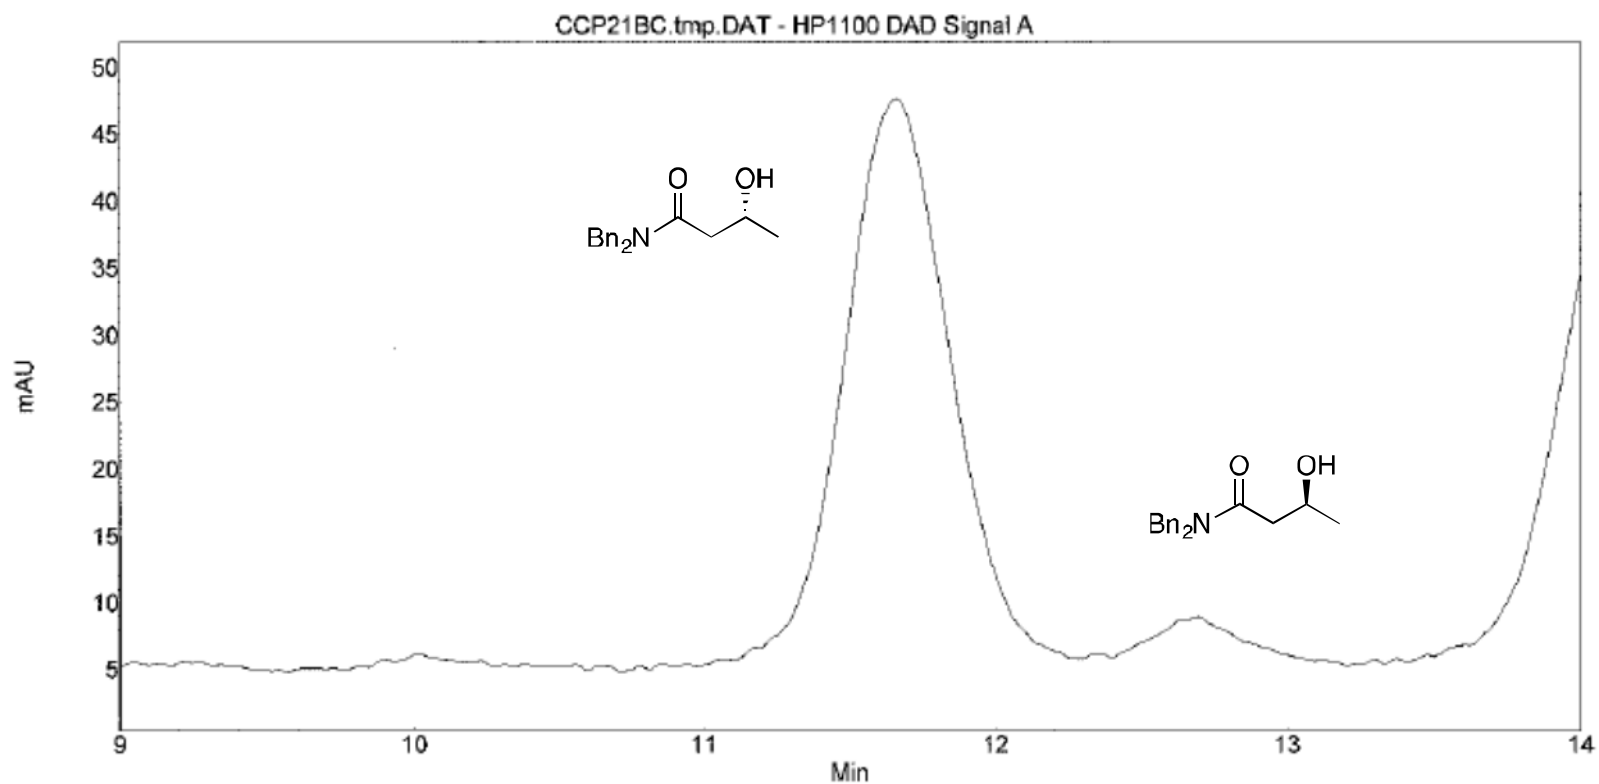

Peak results:

| Index | Name    | Time  | Area      | As. USP | Height | NTP. USP | Selectivity | Signal to Noise Ratio | Width |
|-------|---------|-------|-----------|---------|--------|----------|-------------|-----------------------|-------|
|       |         | [Min] | [mAU*min] |         | [mAU]  |          |             |                       | [Min] |
| 1     | UNKNOWN | 11.67 | 11.3148   | 1.06    | 33.34  | 7339.00  | 0.00        | 3.5986                | 0.33  |
| 2     | UNKNOWN | 12.70 | 1.2386    | 0.96    | 3.39   | 10524.63 | 1.09        | 0.3658                | 0.31  |
| Total |         |       | 12.5534   |         |        |          |             |                       |       |



Analysis of *N*-Cyclohexyl-3-hydroxy-3-phenylpropanamide (2m-OH) using SFC (Column OD-H, 10% *i*-PrOH, 2 mL, 10\_MPa).

Chromatogram of oxidized racemic borylation product:

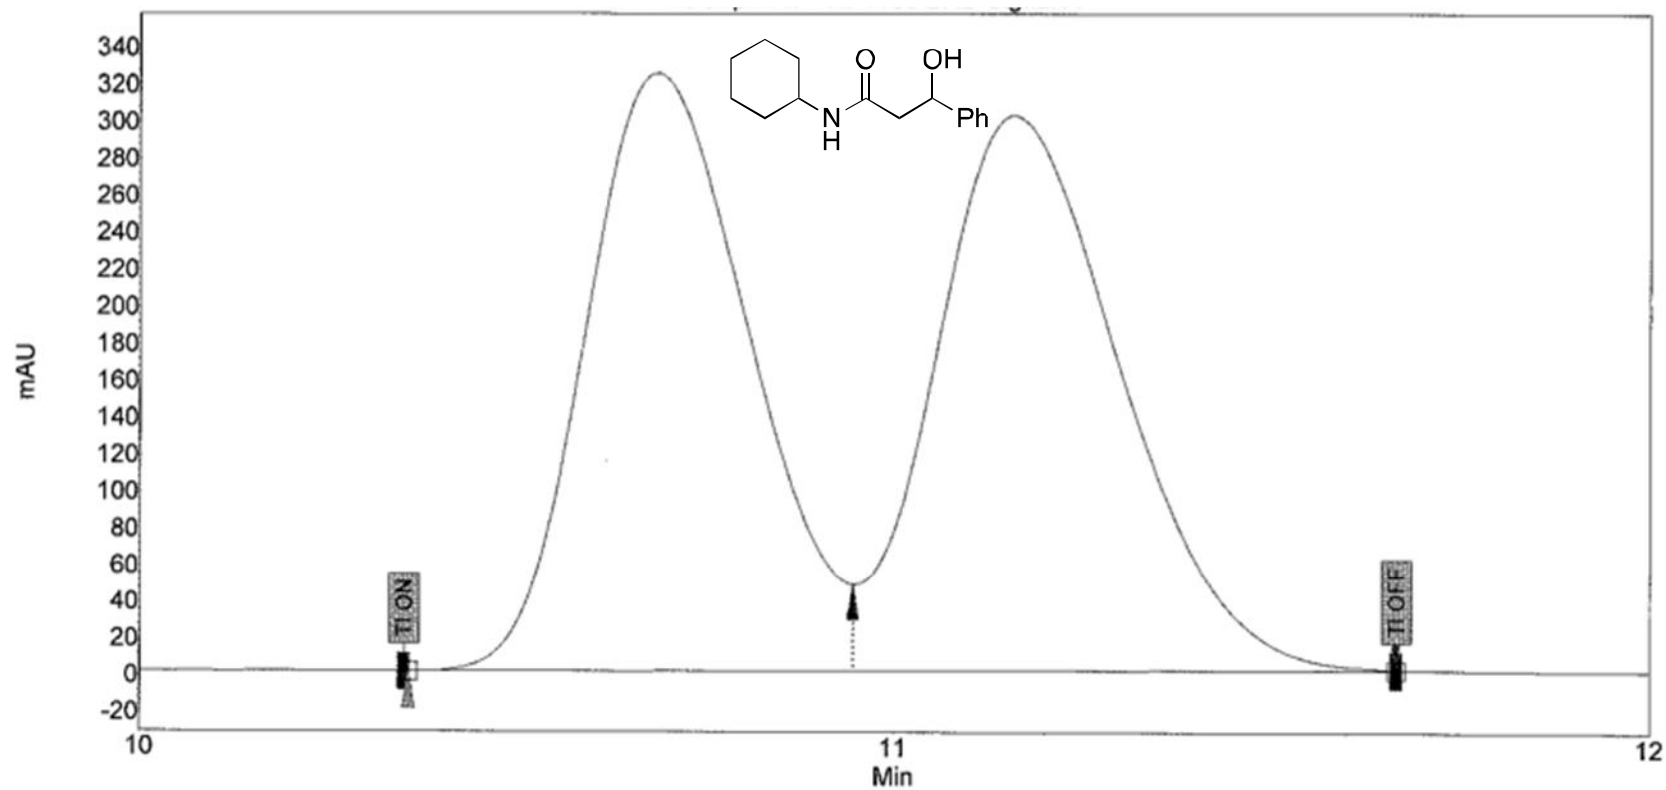

Peak results:

| Index | Name    | Time  | Area      | As. USP | Height | NTP USP  | Selectivity | Signal to Noise Ratio | Width |
|-------|---------|-------|-----------|---------|--------|----------|-------------|-----------------------|-------|
|       |         | [Min] | [mAU*min] |         | [mAU]  |          |             |                       | [Min] |
| 1     | UNKNOWN | 10.69 | 82.3371   | 1.13    | 323.67 | 10689.58 | 0.00        | 1001.8781             | 0.24  |
| 2     | UNKNOWN | 11.16 | 85.1214   | 1.28    | 300.55 | 9827.75  | 1.04        | 930.2964              | 0.26  |
| Total |         |       | 167.4585  |         |        |          |             |                       |       |

Analysis of (*S*)-*N*-Cyclohexyl-3-hydroxy-3-phenylpropanamide (2*m*-OH) using SFC (Column OD-H, 10% *i*-PrOH, 2 mL, 10\_MPa).

Chromatogram of oxidized enantioenriched borylation product from BBA:

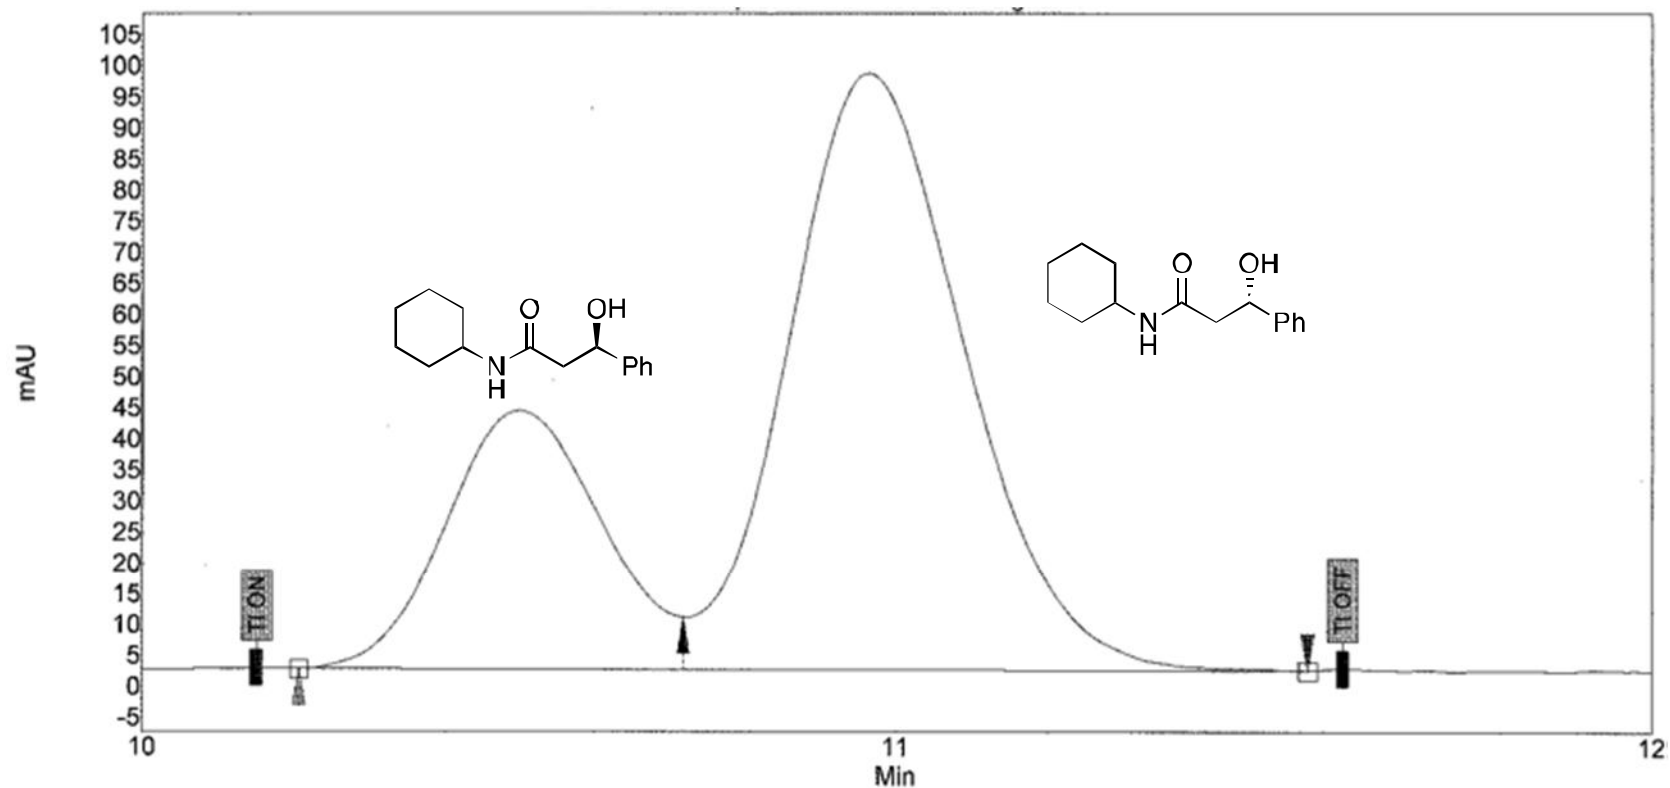

Peak results:

| Index | Name    | Time<br>[Min] | Area<br>[mAU*min] | As USP | Height<br>[mAU] | NTP USP  | Selectivity | Signal to Noise Ratio | Width<br>[Min] |
|-------|---------|---------------|-------------------|--------|-----------------|----------|-------------|-----------------------|----------------|
| 1     | UNKNOWN | 10.50         | 10.1737           | 1.01   | 41.74           | 11160.82 | 0.00        | 69.2590               | 0.23           |
| 2     | UNKNOWN | 10.97         | 25.7755           | 1.11   | 96.05           | 10644.86 | 1.04        | 159.3687              | 0.25           |
| Total |         |               | 35.9492           |        |                 |          |             |                       |                |

Analysis of (*S*)-*N*-Cyclohexyl-3-hydroxy-3-phenylpropanamide (2m-OH) using SFC (Column OD-H, 10% *i*-PrOH, 2 mL, 10\_MPa).

Chromatogram of oxidized enantioenriched borylation product from tetrakis(dimethylamino)diboron:

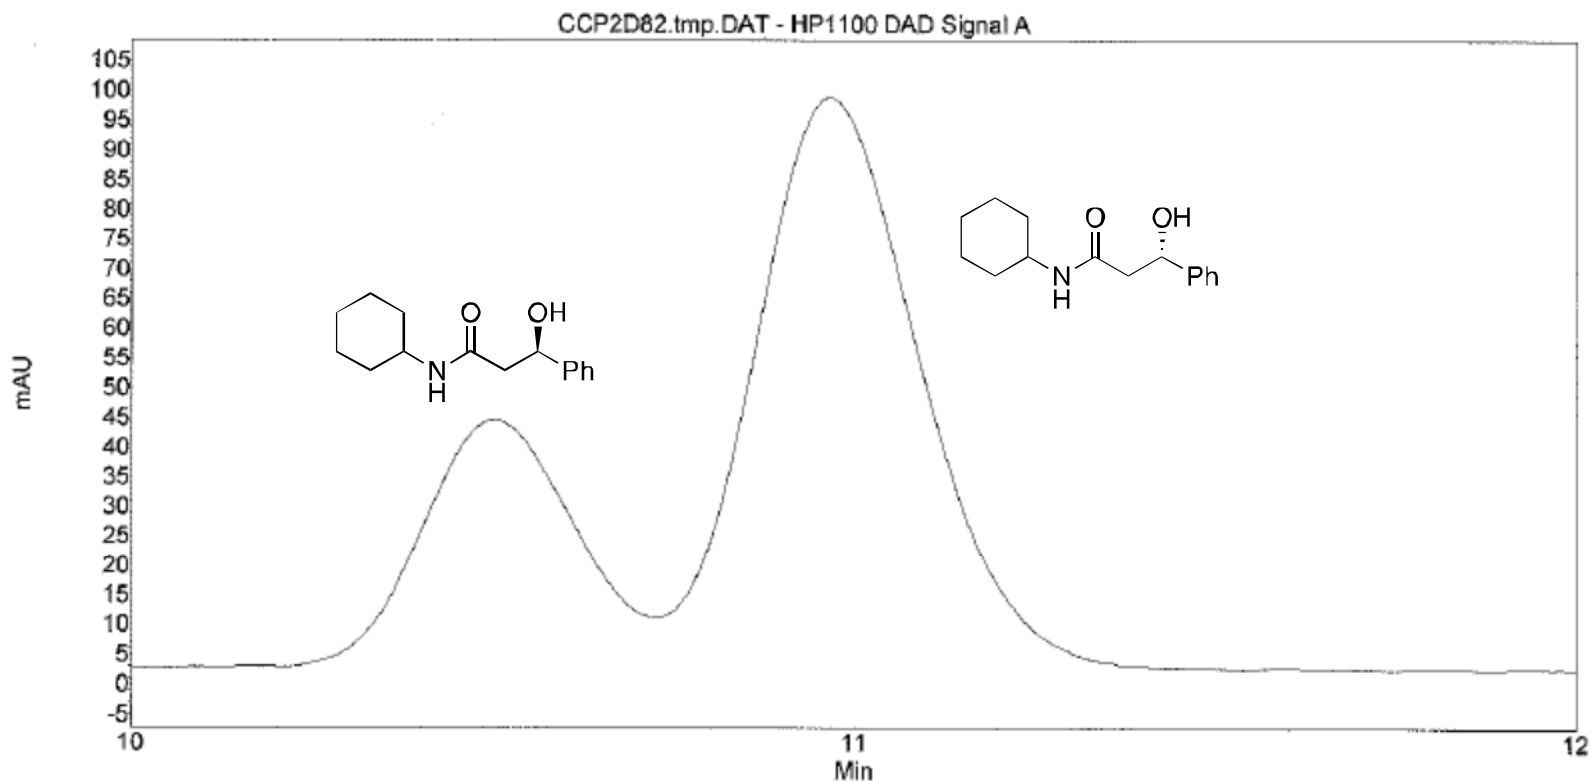

Peak results:

| Index | Name    | Time  | Area      | As USP | Height | NTP USP  | Selectivity | Signal to Noise Ratio | Width |
|-------|---------|-------|-----------|--------|--------|----------|-------------|-----------------------|-------|
|       |         | [Min] | [mAU*min] |        | [mAU]  |          |             |                       | [Min] |
| 1     | UNKNOWN | 10.50 | 7.4780    | 1.18   | 35.30  | 14553.64 | 0.00        | 58.5738               | 0.21  |
| 2     | UNKNOWN | 10.97 | 23.8683   | 1.05   | 92.68  | 11226.80 | 1.04        | 153.7824              | 0.24  |
| Total |         |       | 31.3463   |        |        |          |             |                       |       |

Analysis of 3-Hydroxy-3-phenyl-1-(pyrrolidin-1-yl)propan-1-one (2n-OH) using SFC (Column OD-H, 10% *i*-PrOH, 2 mL, 10\_MPa).

Chromatogram of oxidized racemic borylation product:

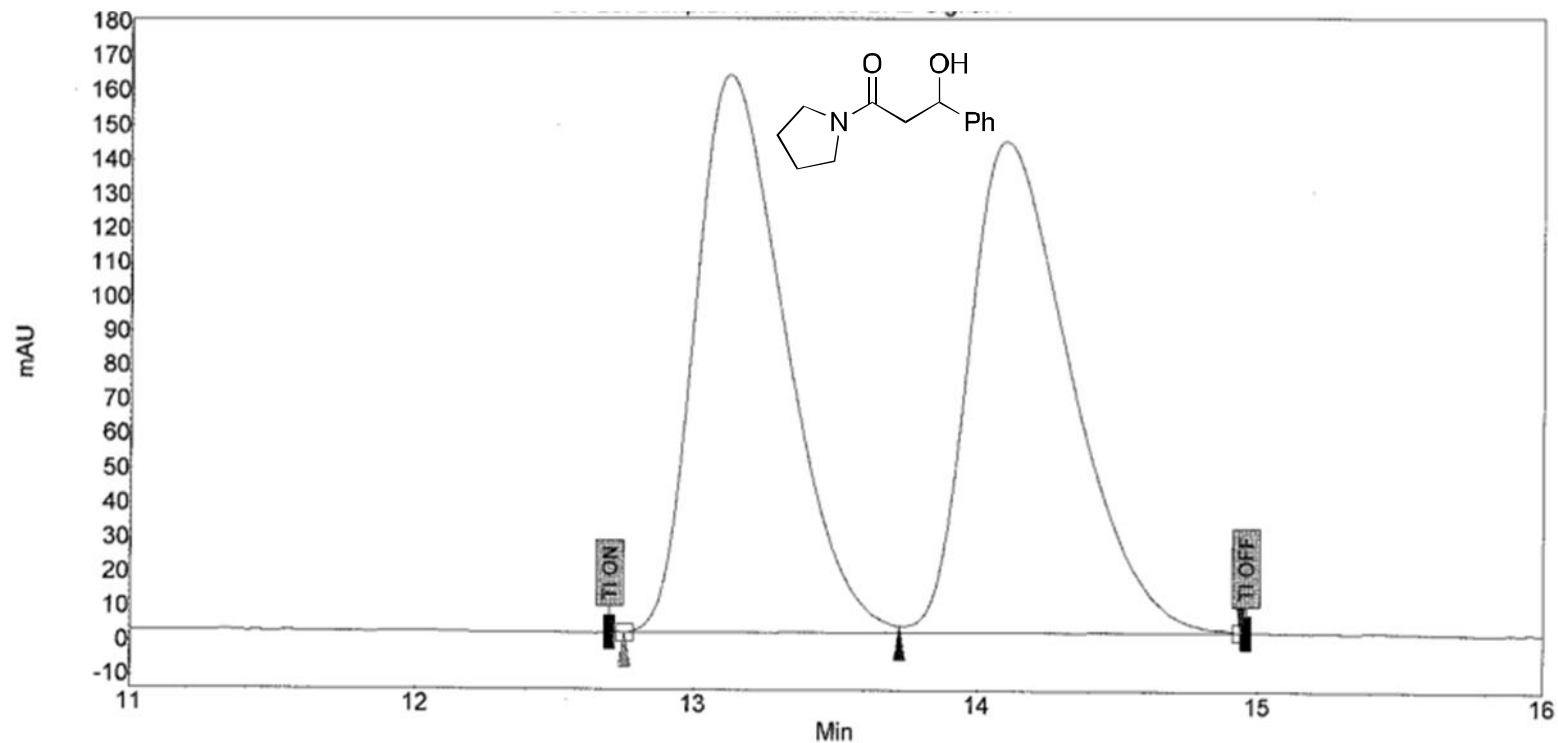

Peak results:

| Index | Name    | Time  | Area      | As. USP | Height | NTP USP | Selectivity | Signal to Noise Ratio | Width |
|-------|---------|-------|-----------|---------|--------|---------|-------------|-----------------------|-------|
|       |         | [Min] | [mAU*min] |         | [mAU]  |         |             |                       | [Min] |
| 1     | UNKNOWN | 13.12 | 59.2911   | 1.44    | 161.64 | 8028.76 | 0.00        | 13.0343               | 0.34  |
| 2     | UNKNOWN | 14.10 | 59.5638   | 1.53    | 142.07 | 7156.64 | 1.07        | 11.4559               | 0.39  |
| Total |         |       | 118.8549  |         |        |         |             |                       |       |

Analysis of (*S*)-3-Hydroxy-3-phenyl-1-(pyrrolidin-1-yl)propan-1-one (2n-OH) using SFC (Column OD-H, 10% *i*-PrOH, 2 mL, 10\_MPa).

Chromatogram of oxidized enantioenriched borylation product:

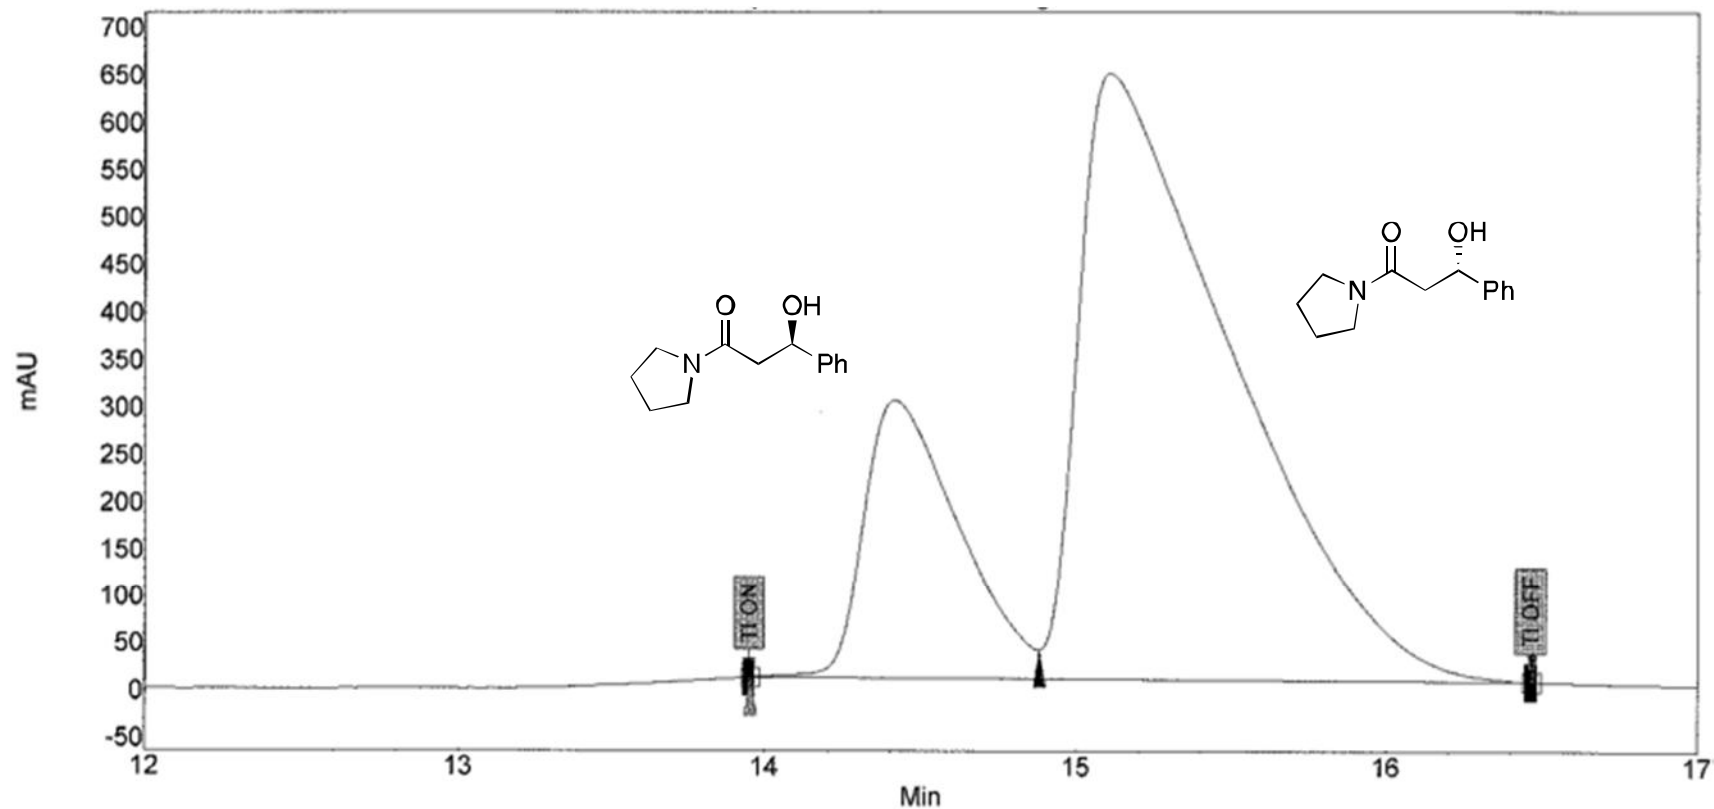

Peak results:

| Index | Name    | Time  | Area      | As USP | Height | NTP USP | Selectivity | Signal to Noise Ratio | Width |
|-------|---------|-------|-----------|--------|--------|---------|-------------|-----------------------|-------|
|       |         | [Min] | [mAU*min] |        | [mAU]  |         |             |                       | [Min] |
| 1     | UNKNOWN | 14.41 | 104.2411  | 1.65   | 293.66 | 9471.54 | 0.00        | 30.3092               | 0.34  |
| 2     | UNKNOWN | 15.11 | 368.4941  | 2.70   | 639.09 | 3804.64 | 1.05        | 65.9615               | 0.54  |
| Total |         |       | 472.7352  |        |        |         |             |                       |       |

Analysis of Ethyl 3-hydroxybutanoate (7a-OH) using SFC (Column AD-H, 10% *i*-PrOH, 2 mL, 10\_MPa).

Chromatogram of oxidized racemic borylation product:

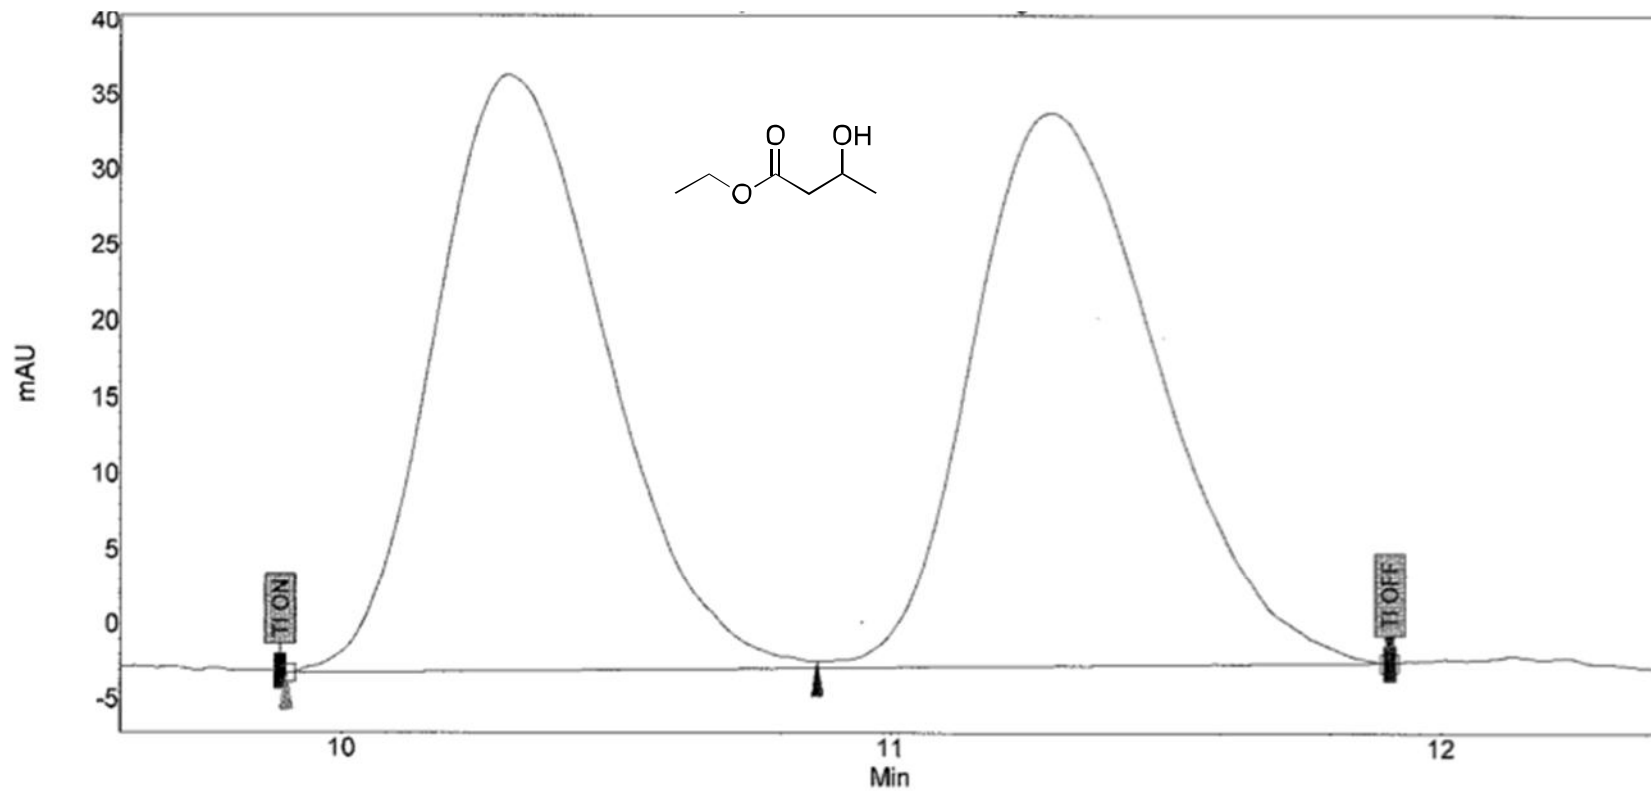

Peak results:

| Index | Name    | Time  | Area      | As. USP | Height | NTP USP | Selectivity | Signal to Noise Ratio | Width |
|-------|---------|-------|-----------|---------|--------|---------|-------------|-----------------------|-------|
|       |         | [Min] | [mAU*min] |         | [mAU]  |         |             |                       | [Min] |
| 1     | UNKNOWN | 10.30 | 14.2926   | 1.27    | 39.45  | 5174.57 | 0.00        | 80.5924               | 0.34  |
| 2     | UNKNOWN | 11.29 | 14.3339   | 1.28    | 36.53  | 5252.76 | 1.10        | 74.6179               | 0.37  |
| Total |         |       | 28.6265   |         |        |         |             |                       |       |

Analysis of (*R*)-Ethyl 3-hydroxybutanoate (7a-OH) using SFC (Column AD-H, 10% *i*-PrOH, 2 mL, 10\_MPa).

Chromatogram of oxidized enantioenriched borylation product from BBA:

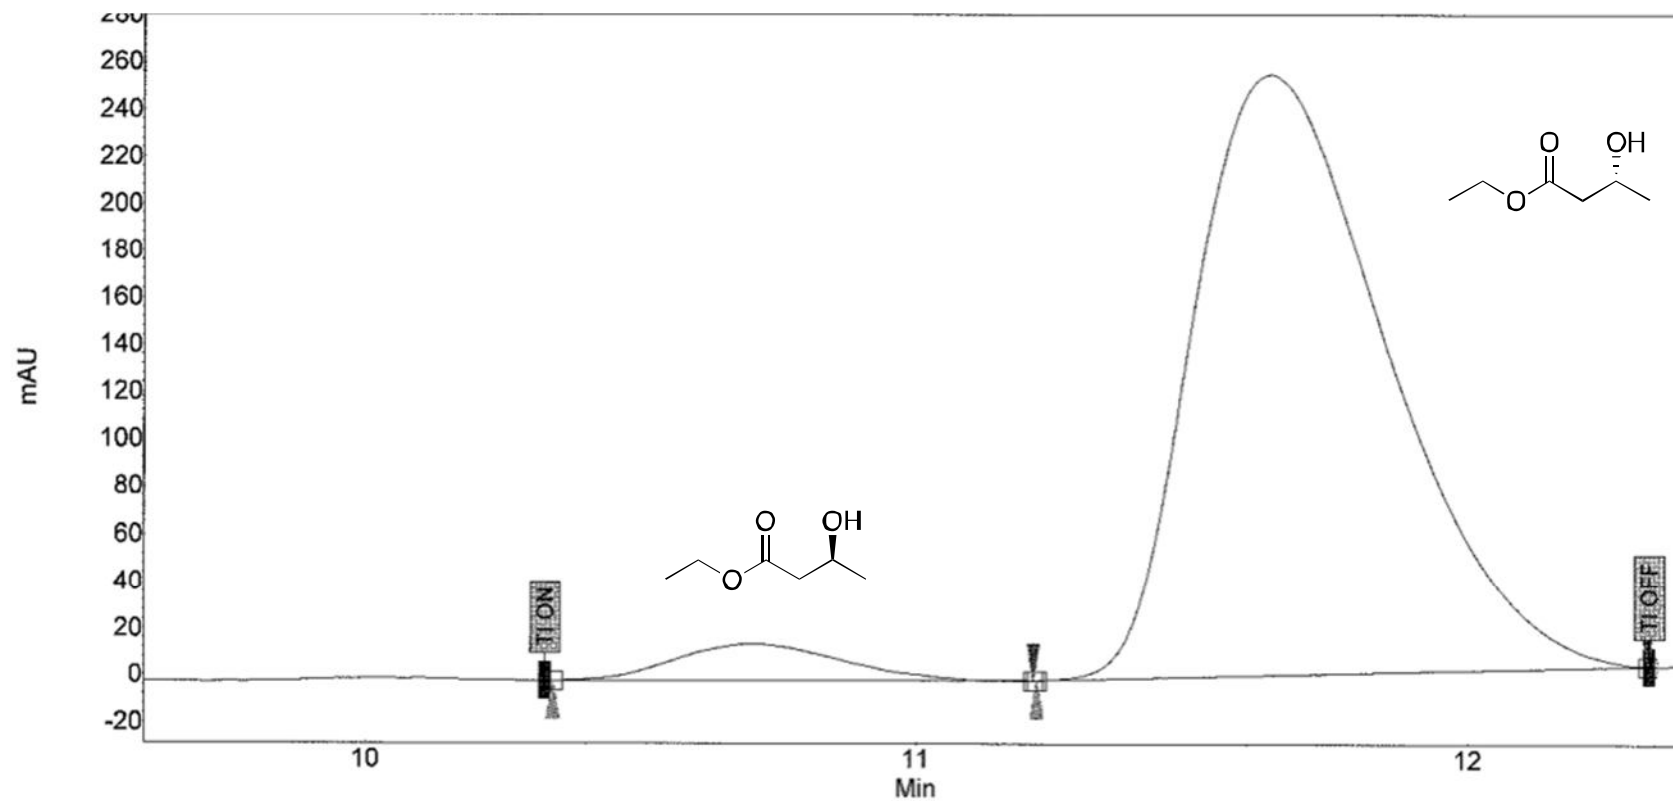

Peak results:

| Index | Name    | Time  | Area      | As USP | Height | NTP USP | Selectivity | Signal to Noise Ratio | Width |
|-------|---------|-------|-----------|--------|--------|---------|-------------|-----------------------|-------|
|       |         | [Min] | [mAU*min] |        | [mAU]  |         |             |                       | [Min] |
| 1     | UNKNOWN | 10.71 | 5.4330    | 1.15   | 15.55  | 5882.34 | 0.00        | 33.7447               | 0.33  |
| 2     | UNKNOWN | 11.64 | 102.6920  | 1.52   | 254.39 | 5304.62 | 1.09        | 551.8863              | 0.38  |
| Total |         |       | 108.1250  |        |        |         |             |                       |       |

Analysis of Ethyl-3-hydroxyoctanoate using (7b-OH) SFC (Column AD-H, 10% *i*-PrOH, 2 mL, 10\_MPa).

Chromatogram of oxidized racemic borylation product:

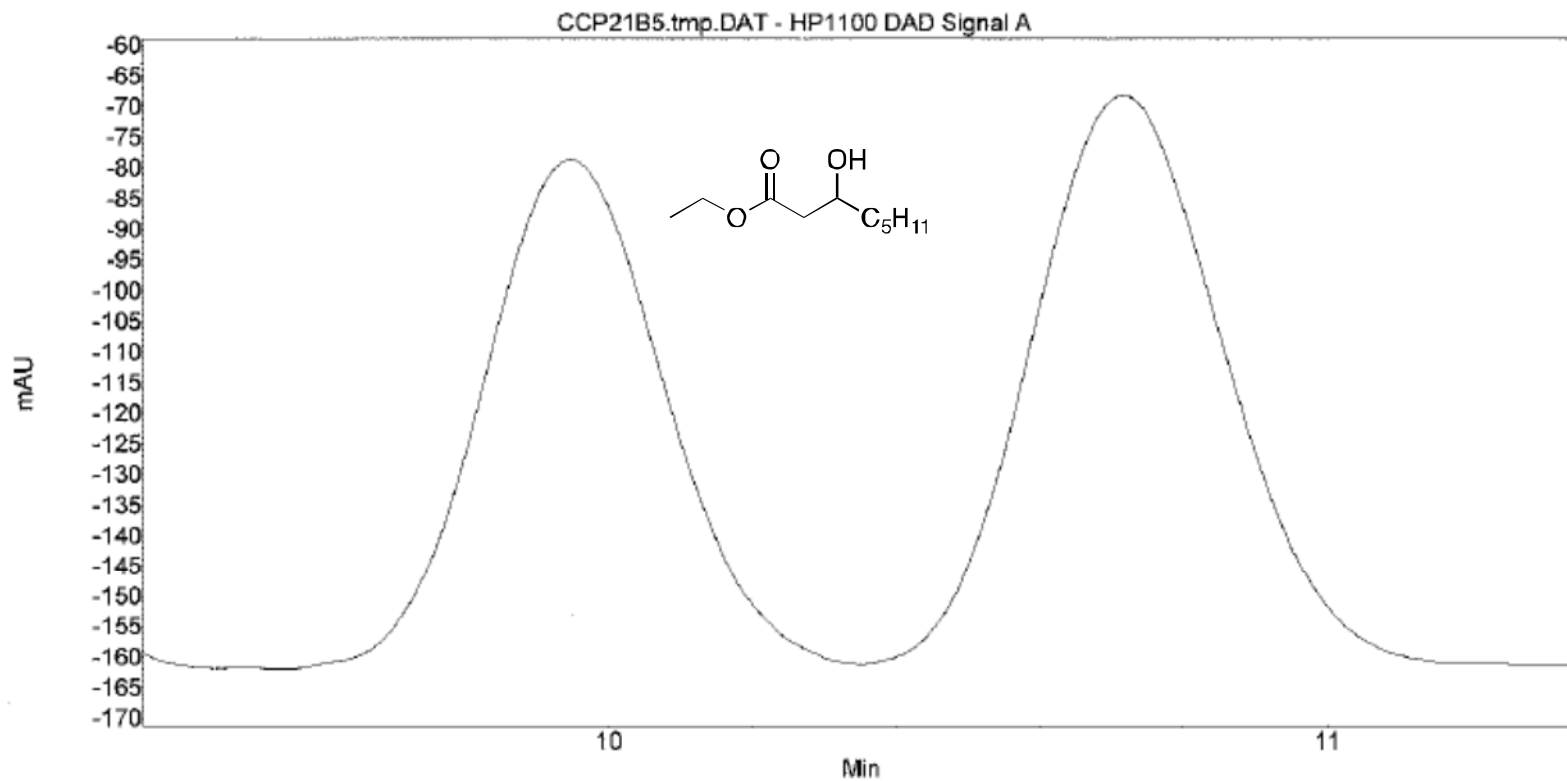

Peak results:

| Index | Name    | Time  | Area      | As USP | Height | NTP USP | Selectivity | Signal to Noise Ratio | Width |
|-------|---------|-------|-----------|--------|--------|---------|-------------|-----------------------|-------|
|       |         | [Min] | [mAU*min] |        | [mAU]  |         |             |                       | [Min] |
| 1     | UNKNOWN | 9.95  | 24.2851   | 1.07   | 82.84  | 7174.51 | 0.00        | 0.9337                | 0.28  |
| 2     | UNKNOWN | 10.71 | 25.4099   | 1.10   | 87.65  | 8150.51 | 1.08        | 0.9880                | 0.28  |
| Total |         |       | 49.6949   |        |        |         |             |                       |       |



Analysis of (*R*)-Ethyl-3-hydroxyoctanoate using (7b-OH) SFC (Column AD-H, 10% *i*-PrOH, 2 mL, 10\_MPa).

Chromatogram of oxidized enantioenriched borylation product from BBA:

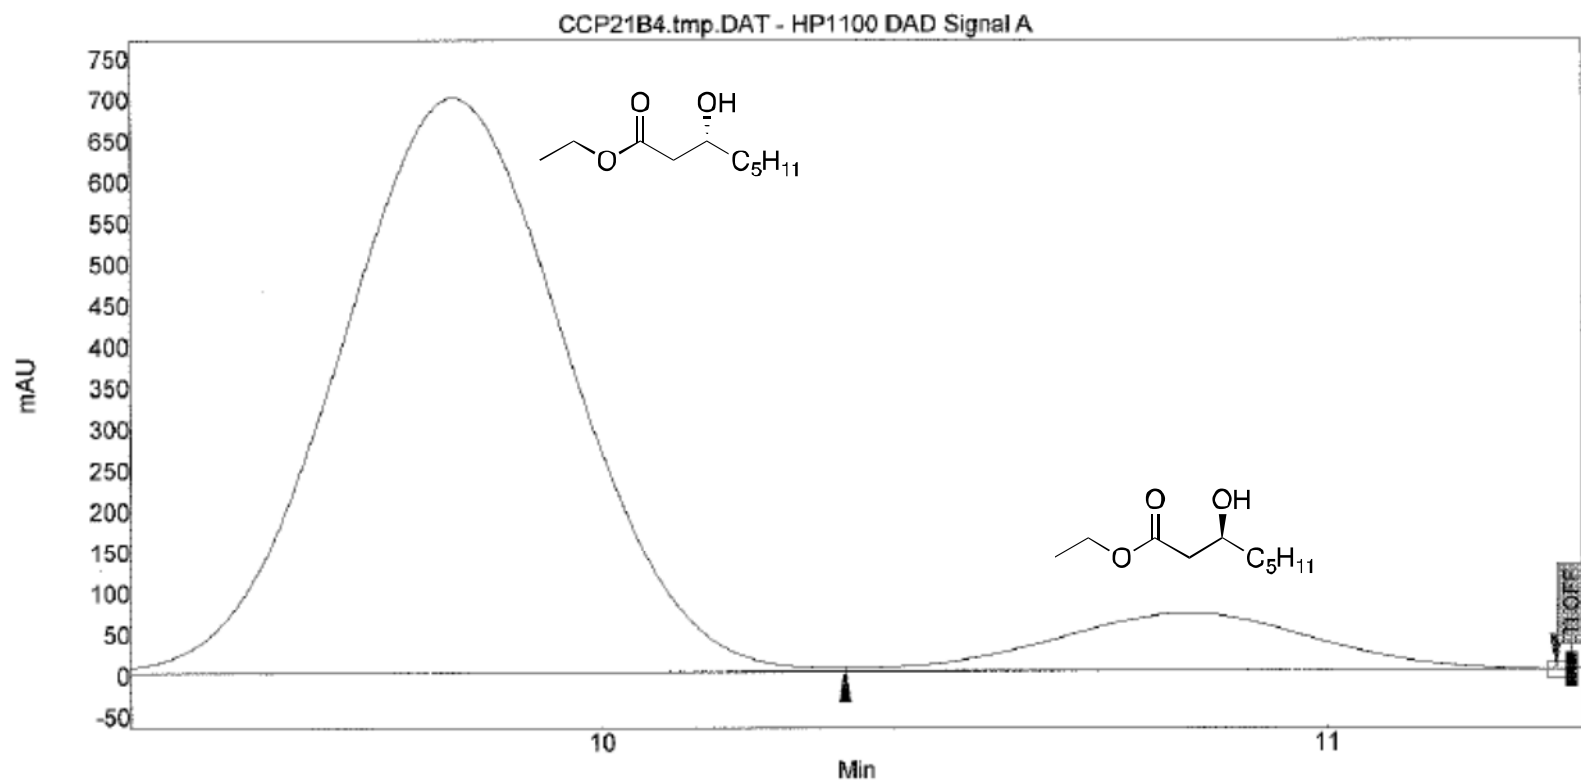

Peak results:

| Index | Name    | Time  | Area      | As. USP | Height | NTP USP | Selectivity | Signal to Noise Ratio | Width |
|-------|---------|-------|-----------|---------|--------|---------|-------------|-----------------------|-------|
|       |         | [Min] | [mAU*min] |         | [mAU]  |         |             |                       | [Min] |
| 1     | UNKNOWN | 9.79  | 257.6532  | 1.02    | 698.09 | 4285.74 | 0.00        | 569.0045              | 0.35  |
| 2     | UNKNOWN | 10.81 | 28.9661   | 0.94    | 69.75  | 4243.08 | 1.10        | 56.8523               | 0.39  |
| Total |         |       | 286.6193  |         |        |         |             |                       |       |

Analysis of 3-Hydroxy-1-phenylbutan-1-one (7c-OH) using SFC (Column AS-H, 10% *i*-PrOH, 2 mL, 10\_MPa).

Chromatogram of oxidized racemic borylation product:

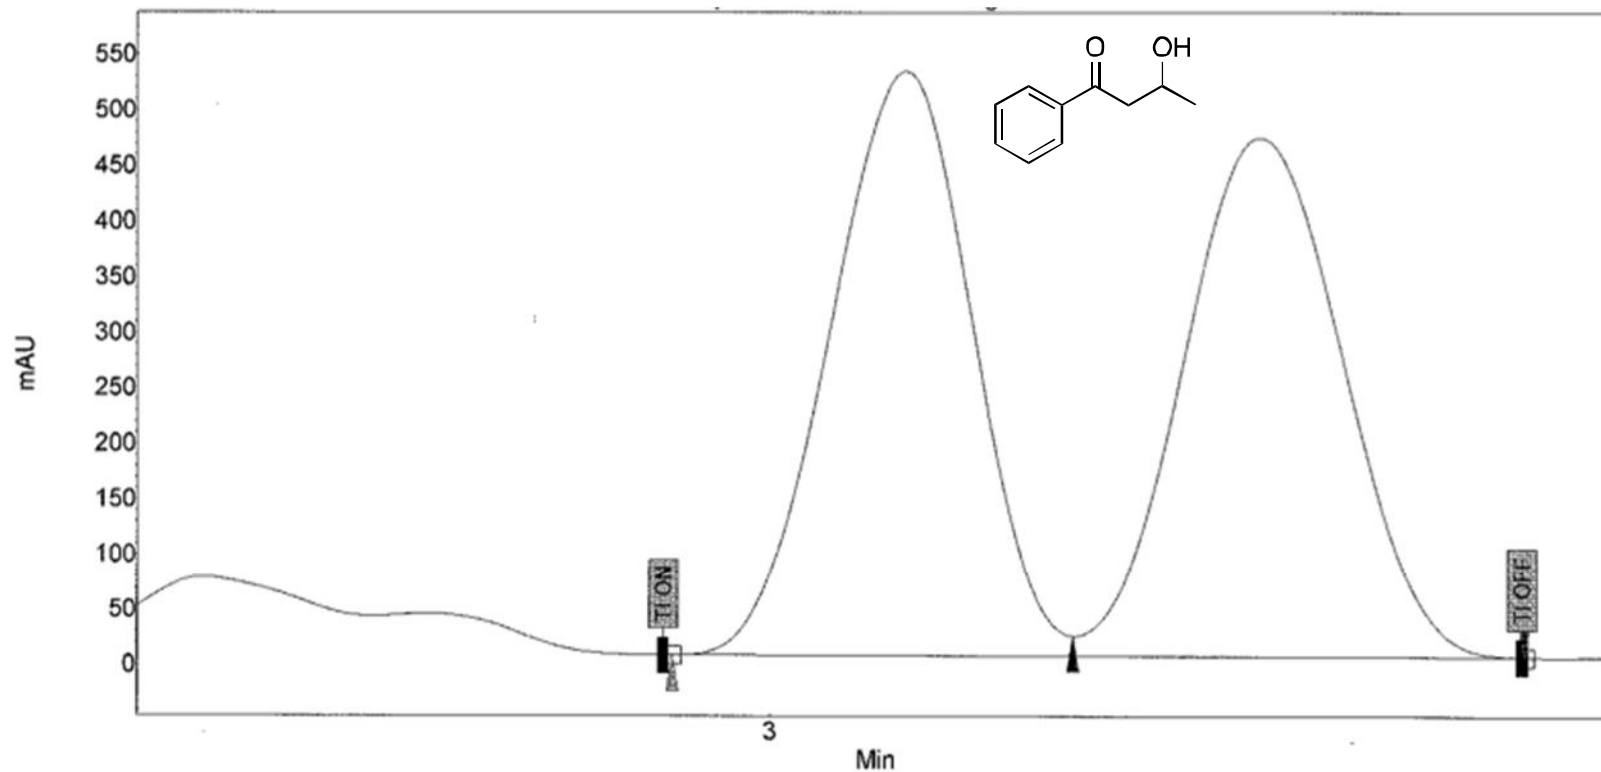

Peak results:

| Index | Name    | Time  | Area      | As. USP | Height | NTP USP | Selectivity | Signal to Noise Ratio | Width |
|-------|---------|-------|-----------|---------|--------|---------|-------------|-----------------------|-------|
|       |         | [Min] | [mAU*min] |         | [mAU]  |         |             |                       | [Min] |
| 1     | UNKNOWN | 3.13  | 81.5532   | 0.97    | 526.71 | 2467.86 | 0.00        | 205.4261              | 0.15  |
| 2     | UNKNOWN | 3.47  | 82.0909   | 1.01    | 467.43 | 2427.78 | 1.11        | 182.3069              | 0.17  |
| Total |         |       | 163.6441  |         |        |         |             |                       |       |

Analysis of (*R*)-3-Hydroxy-1-phenylbutan-1-one (7c-OH) using SFC (Column AS-H, 10% *i*-PrOH, 2 mL, 10\_MPa).

Chromatogram of oxidized enantioenriched borylation product:

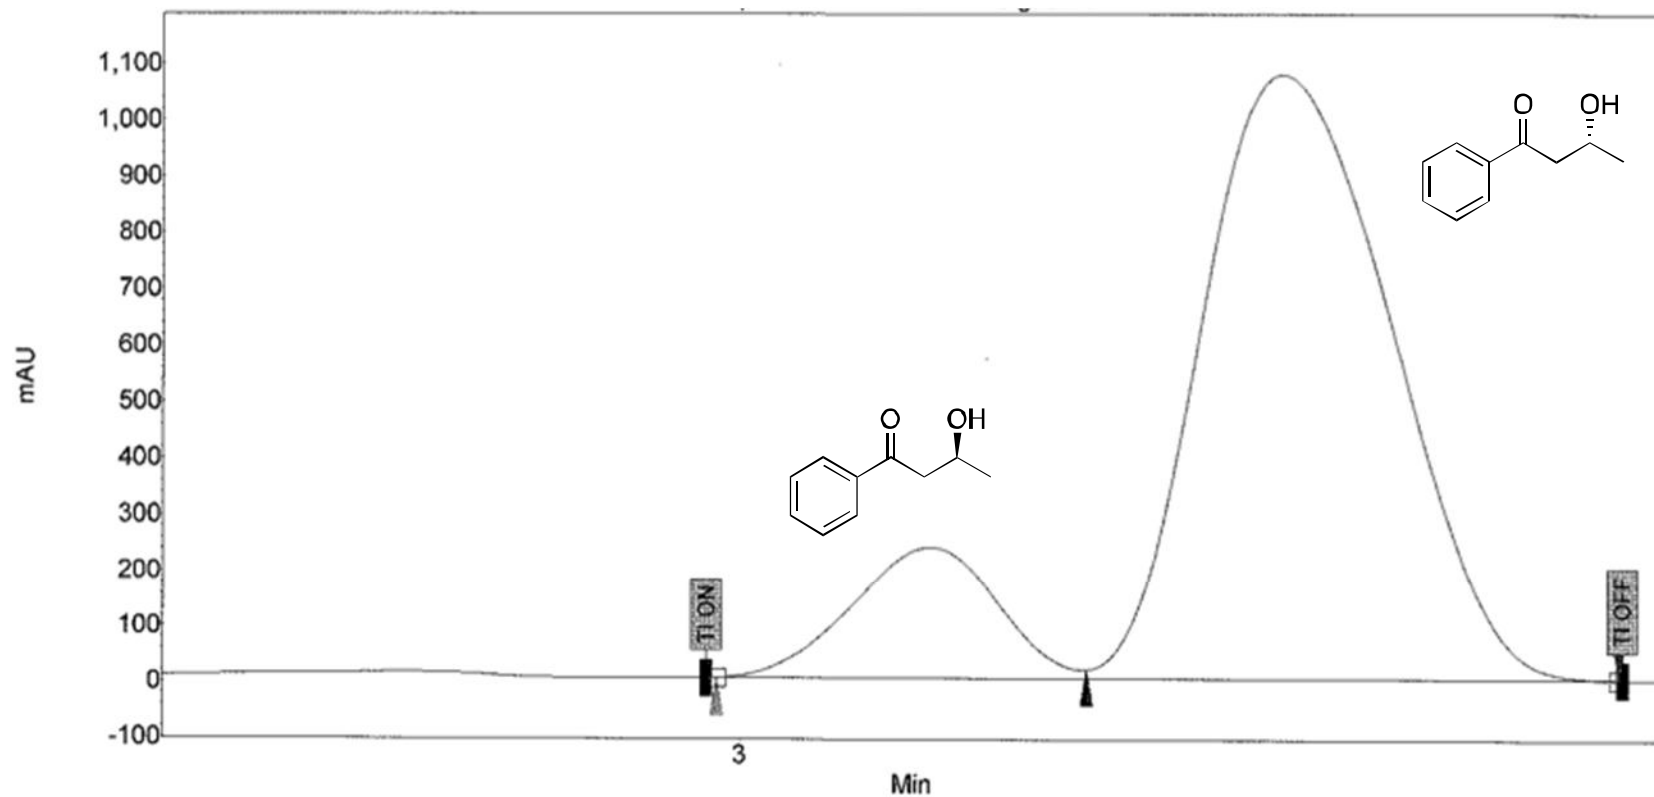

Peak results:

| Index | Name    | Time  | Area      | As. USP | Height  | NTP USP | Selectivity | Signal to Noise Ratio | Width |
|-------|---------|-------|-----------|---------|---------|---------|-------------|-----------------------|-------|
|       |         | [Min] | [mAU*min] |         | [mAU]   |         |             |                       | [Min] |
| 1     | UNKNOWN | 3.17  | 33.9887   | 0.94    | 234.53  | 2902.09 | 0.00        | 91.8863               | 0.14  |
| 2     | UNKNOWN | 3.47  | 203.1895  | 1.22    | 1073.54 | 2082.17 | 1.09        | 420.5948              | 0.19  |
| Total |         |       | 237.1782  |         |         |         |             |                       |       |

Analysis of 3-Hydroxy-1,3-diphenylpropan-1-one (7d-OH) using SFC (Column R,R-Whelk, 10% *i*-PrOH, 2 mL, 10\_MPa).

Chromatogram of oxidized racemic borylation product:

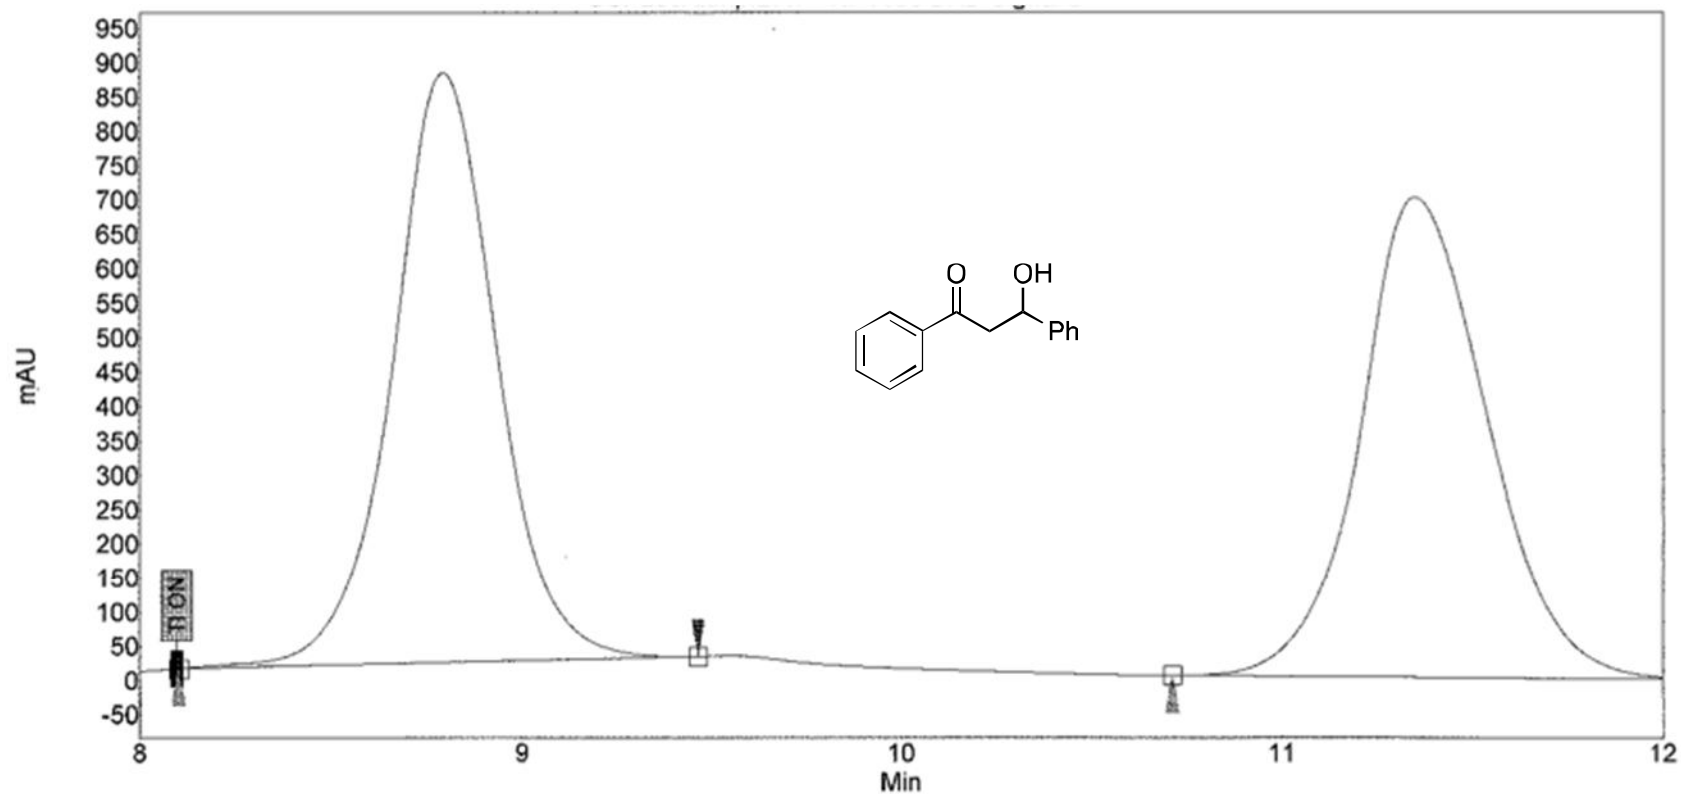

Peak results:

| Index | Name    | Start | Time  | End   | RT Offset | Quantity | Height | Area     | Area    |
|-------|---------|-------|-------|-------|-----------|----------|--------|----------|---------|
|       |         | [Min] | [Min] | [Min] | [Min]     | [% Area] | [μV]   | [μV.Min] | [%]     |
| 1     | UNKNOWN | 8.10  | 8.79  | 9.47  | 0.00      | 50.21    | 858.3  | 273.0    | 50.209  |
| 2     | UNKNOWN | 10.71 | 11.35 | 12.23 | 0.00      | 49.79    | 698.3  | 270.7    | 49.791  |
| Total |         |       |       |       |           | 100.00   | 1556.6 | 543.8    | 100.000 |

Analysis of (*S*)-3-Hydroxy-1,3-diphenylpropan-1-one (7d-OH) using SFC (Column R,R-Whelk, 10% *i*-PrOH, 2 mL, 10\_MPa).

Chromatogram of oxidized enantioenriched borylation product from BBA:

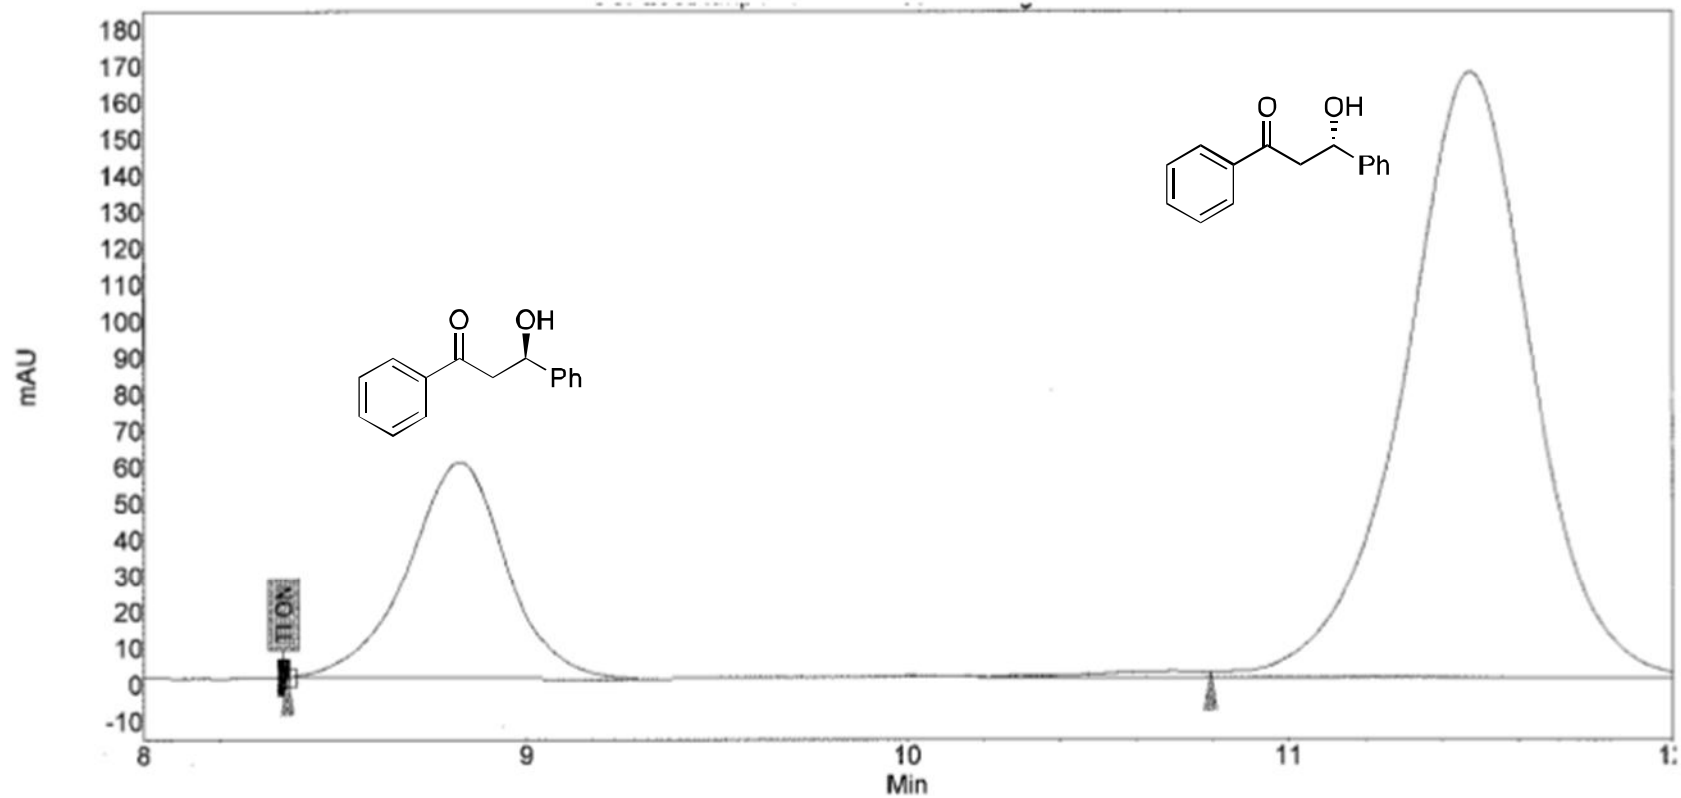

Peak results:

| Index | Name    | Time<br>[Min] | Area<br>[mAU*min] | As. USP | Height<br>[mAU] | NTP USP | Selectivity | Signal to Noise Ratio | Width<br>[Min] |
|-------|---------|---------------|-------------------|---------|-----------------|---------|-------------|-----------------------|----------------|
| 1     | UNKNOWN | 8.82          | 17.6262           | 0.98    | 59.20           | 5811.38 | 0.00        | 5.5823                | 0.27           |
| 2     | UNKNOWN | 11.47         | 63.9925           | 0.95    | 166.21          | 6064.37 | 1.30        | 15.6729               | 0.34           |
| Total |         |               | 81.6187           |         |                 |         |             |                       |                |

Analysis of *N*-(4-Methoxyphenyl)-3-phenylbutanamide (8) using SFC (Column OJ-H, 10% *i*-PrOH, 2 mL, 10 MPa).

Chromatogram of racemic cross-coupling product:

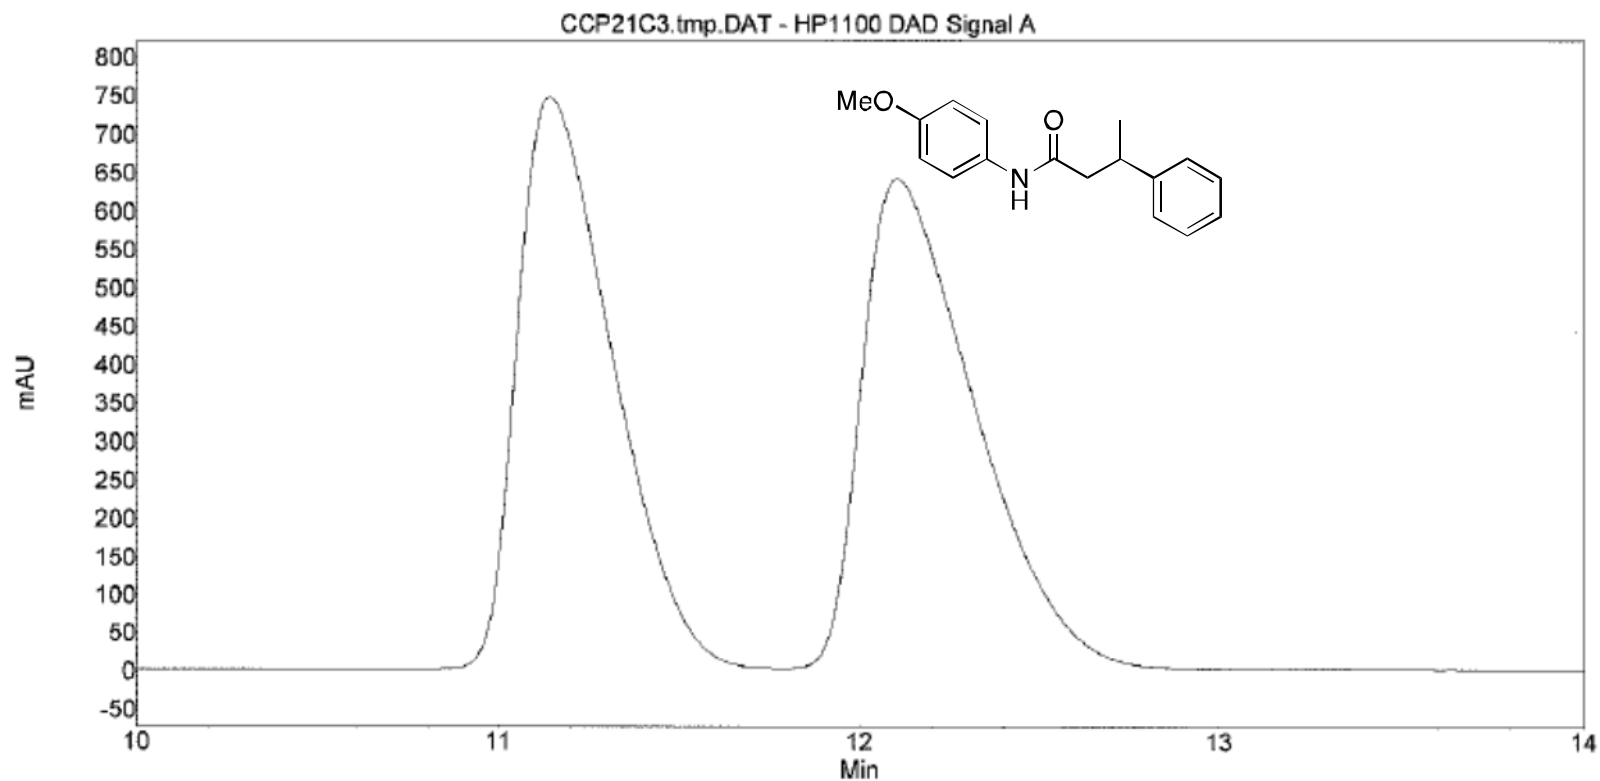

Peak results:

| Index | Name    | Time  | Area      | As. USP | Height | NTP USP | Selectivity | Signal to Noise Ratio | Width |
|-------|---------|-------|-----------|---------|--------|---------|-------------|-----------------------|-------|
|       |         | [Min] | [mAU*min] |         | [mAU]  |         |             |                       | [Min] |
| 1     | UNKNOWN | 11.15 | 228.0510  | 1.59    | 745.88 | 8004.39 | 0.00        | 138.3412              | 0.29  |
| 2     | UNKNOWN | 12.11 | 232.5042  | 1.82    | 639.03 | 6749.56 | 1.09        | 118.5237              | 0.34  |
| Total |         |       | 460.5552  |         |        |         |             |                       |       |

Analysis of (*S*)-*N*-(4-Methoxyphenyl)-3-phenylbutanamide (**8a** from ArCl) using SFC (Column OJ-H, 10% *i*-PrOH, 2 mL, 10 MPa).

Chromatogram of enantioenriched cross-coupling product with aryl chloride:

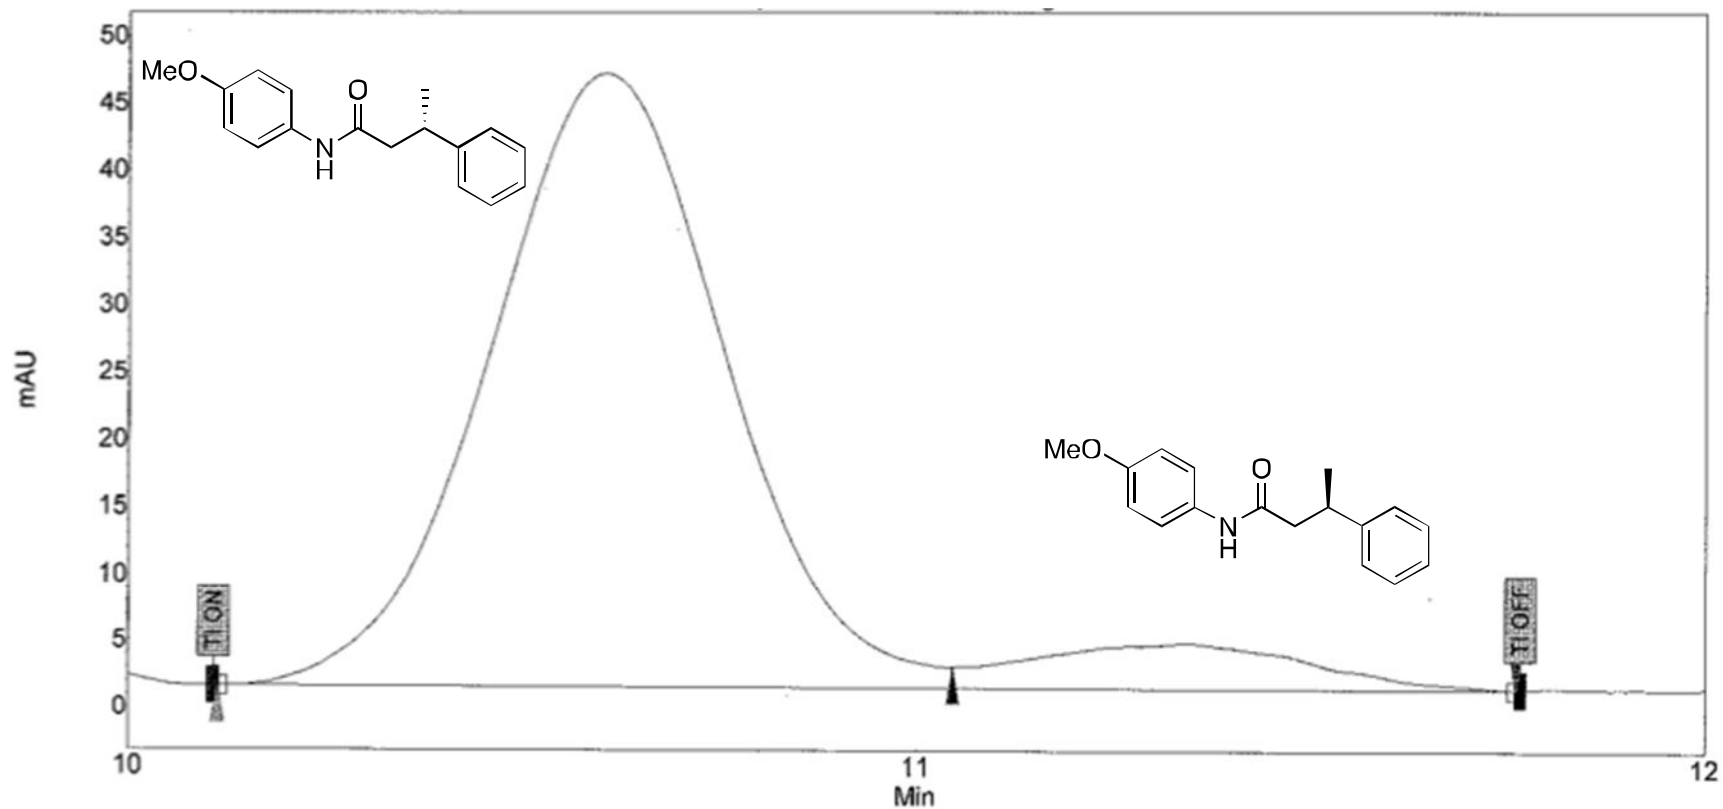

Peak results:

| Index | Name    | Start | Time  | End   | RT Offset | Quantity | Height     | Area           | Area    |
|-------|---------|-------|-------|-------|-----------|----------|------------|----------------|---------|
|       |         | [Min] | [Min] | [Min] | [Min]     | [% Area] | [ $\mu$ V] | [ $\mu$ V.Min] | [%]     |
| 1     | UNKNOWN | 10.11 | 10.61 | 11.05 | 0.00      | 91.86    | 45.6       | 15.8           | 91.863  |
| 2     | UNKNOWN | 11.05 | 11.35 | 11.76 | 0.00      | 8.14     | 3.4        | 1.4            | 8.137   |
| Total |         |       |       |       |           | 100.00   | 48.9       | 17.2           | 100.000 |

Analysis of (*S*)-*N*-(4-Methoxyphenyl)-3-phenylbutanamide (**8a** from ArBr) using SFC (Column OJ-H, 10% *i*-PrOH, 2 mL, 10 MPa).

Chromatogram of enantioenriched cross-coupling product with aryl bromide:

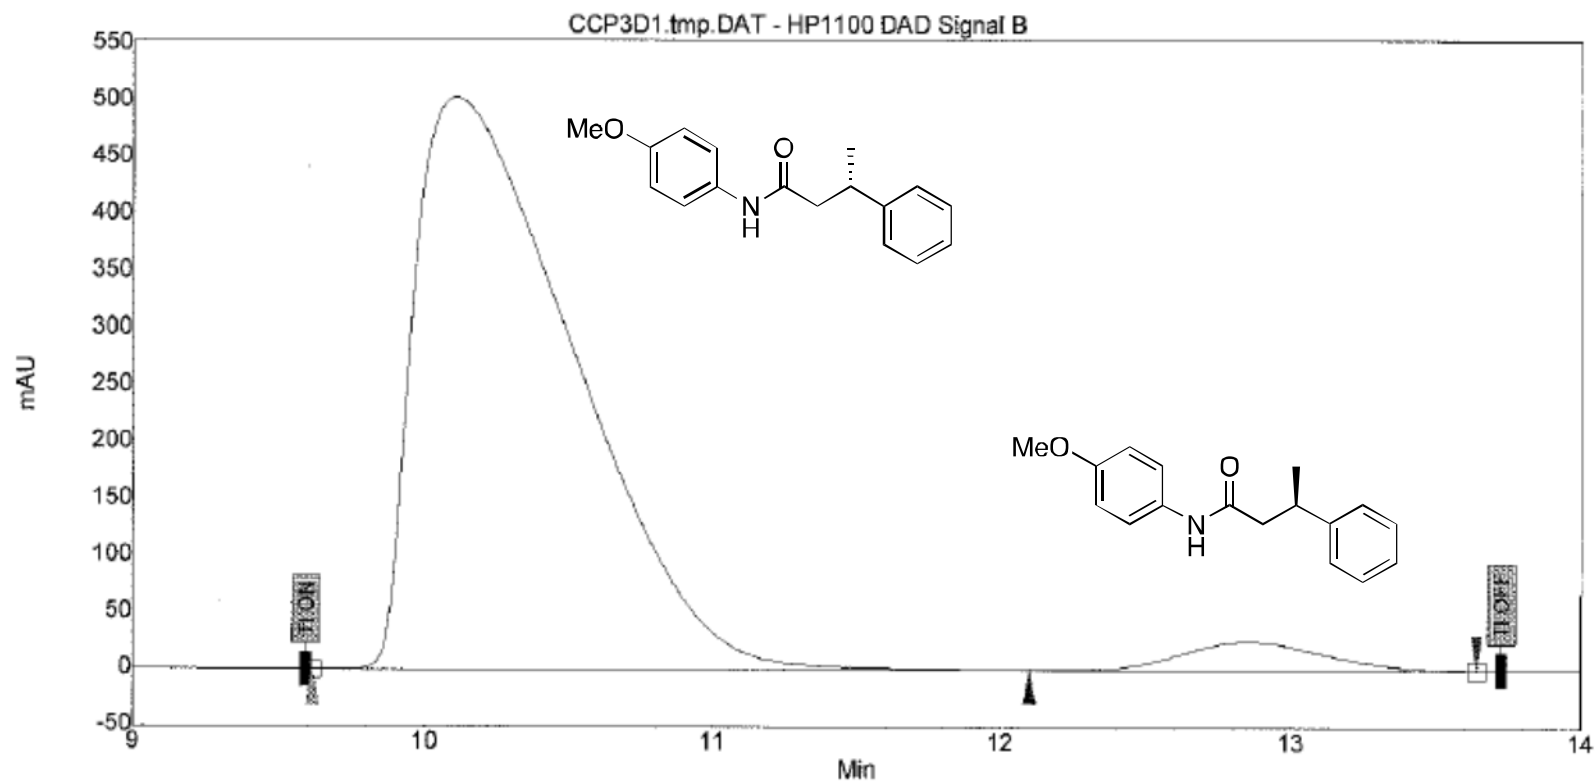

Peak results:

| Index | Name    | Start | Time  | End   | RT Offset | Quantity | Height | Area     | Area    |
|-------|---------|-------|-------|-------|-----------|----------|--------|----------|---------|
|       |         | [Min] | [Min] | [Min] | [Min]     | [% Area] | [μV]   | [μV.Min] | [%]     |
| 1     | UNKNOWN | 9.61  | 10.11 | 12.10 | 0.00      | 95.71    | 503.1  | 320.9    | 95.708  |
| 2     | UNKNOWN | 12.10 | 12.85 | 13.64 | 0.00      | 4.29     | 25.2   | 14.4     | 4.292   |
| Total |         |       |       |       |           | 100.00   | 528.3  | 335.3    | 100.000 |



Analysis of (*S*)-*N*-(4-Methoxyphenyl)-3-phenylbutanamide (**8** from ArOMs) using SFC (Column OJ-H, 10% *i*-PrOH, 2 mL, 10 MPa).

Chromatogram of enantioenriched cross-coupling product with aryl mesylate:

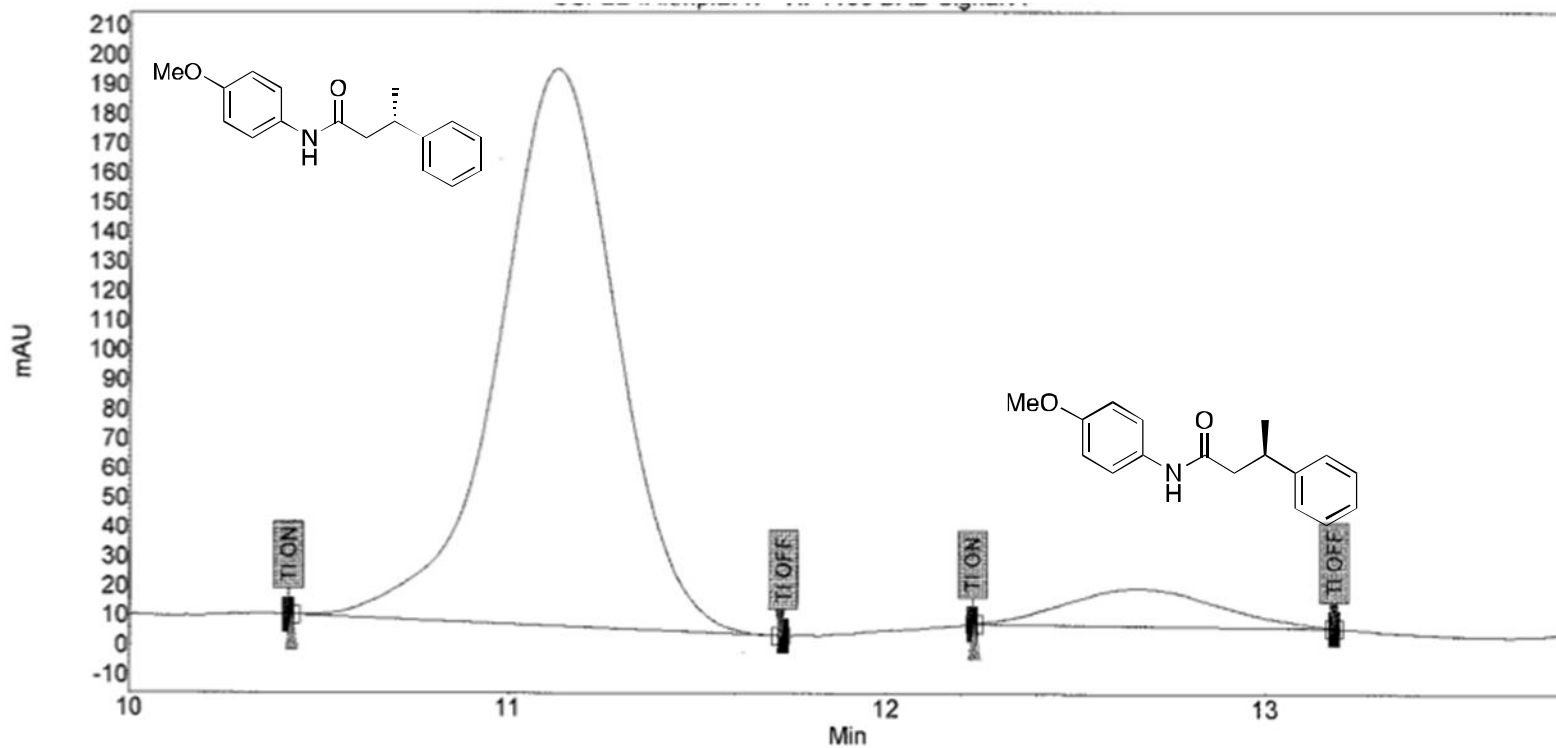

Peak results:

| Index | Name    | Time<br>[Min] | Area<br>[mAU*min] | As. USP | Height<br>[mAU] | NTP USP | Selectivity | Signal to Noise Ratio | Width<br>[Min] |
|-------|---------|---------------|-------------------|---------|-----------------|---------|-------------|-----------------------|----------------|
| 1     | UNKNOWN | 11.13         | 68.4236           | 0.86    | 188.78          | 6361.69 | 0.00        | 306.3204              | 0.32           |
| 2     | UNKNOWN | 12.67         | 5.8663            | 0.99    | 12.63           | 4836.55 | 1.14        | 20.4931               | 0.45           |
| Total |         |               | 74.2899           |         |                 |         |             |                       |                |

Analysis of (*S*)-*N*-(4-Methoxyphenyl)-3-phenylbutanamide (**8a** from ArOTf) using SFC (Column OJ-H, 10% *i*-PrOH, 2 mL, 10 MPa).

Chromatogram of enantioenriched cross-coupling product with aryl triflate:

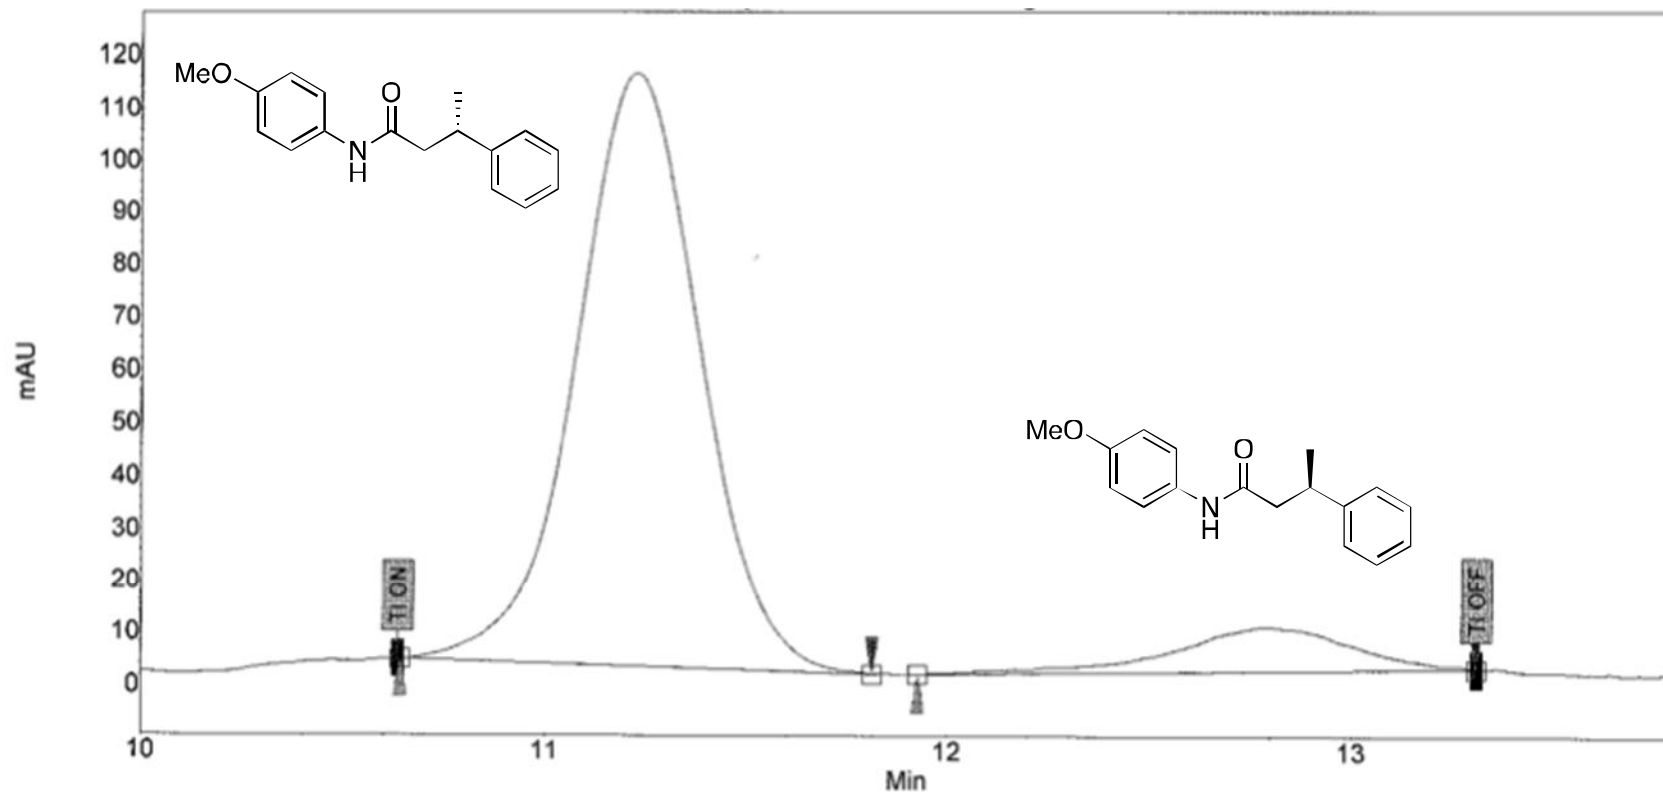

Peak results:

| Index | Name    | Time  | Area      | As. USP | Height | NTP USP | Selectivity | Signal to Noise Ratio | Width |
|-------|---------|-------|-----------|---------|--------|---------|-------------|-----------------------|-------|
|       |         | [Min] | [mAU*min] |         | [mAU]  |         |             |                       | [Min] |
| 1     | UNKNOWN | 11.23 | 40.0976   | 0.96    | 113.04 | 6573.29 | 0.00        | 208.9299              | 0.32  |
| 2     | UNKNOWN | 12.79 | 4.3252    | 0.95    | 8.47   | 5203.10 | 1.14        | 15.6472               | 0.45  |
| Total |         |       | 44.4228   |         |        |         |             |                       |       |

Analysis of *N*-(4-Methoxyphenyl)-3-(pyridin-3-yl)butanamide (12a) using SFC (Column OJ-H, 10% *i*-PrOH, 2 mL, 10\_MPa).

Chromatogram of racemic cross-coupling product:

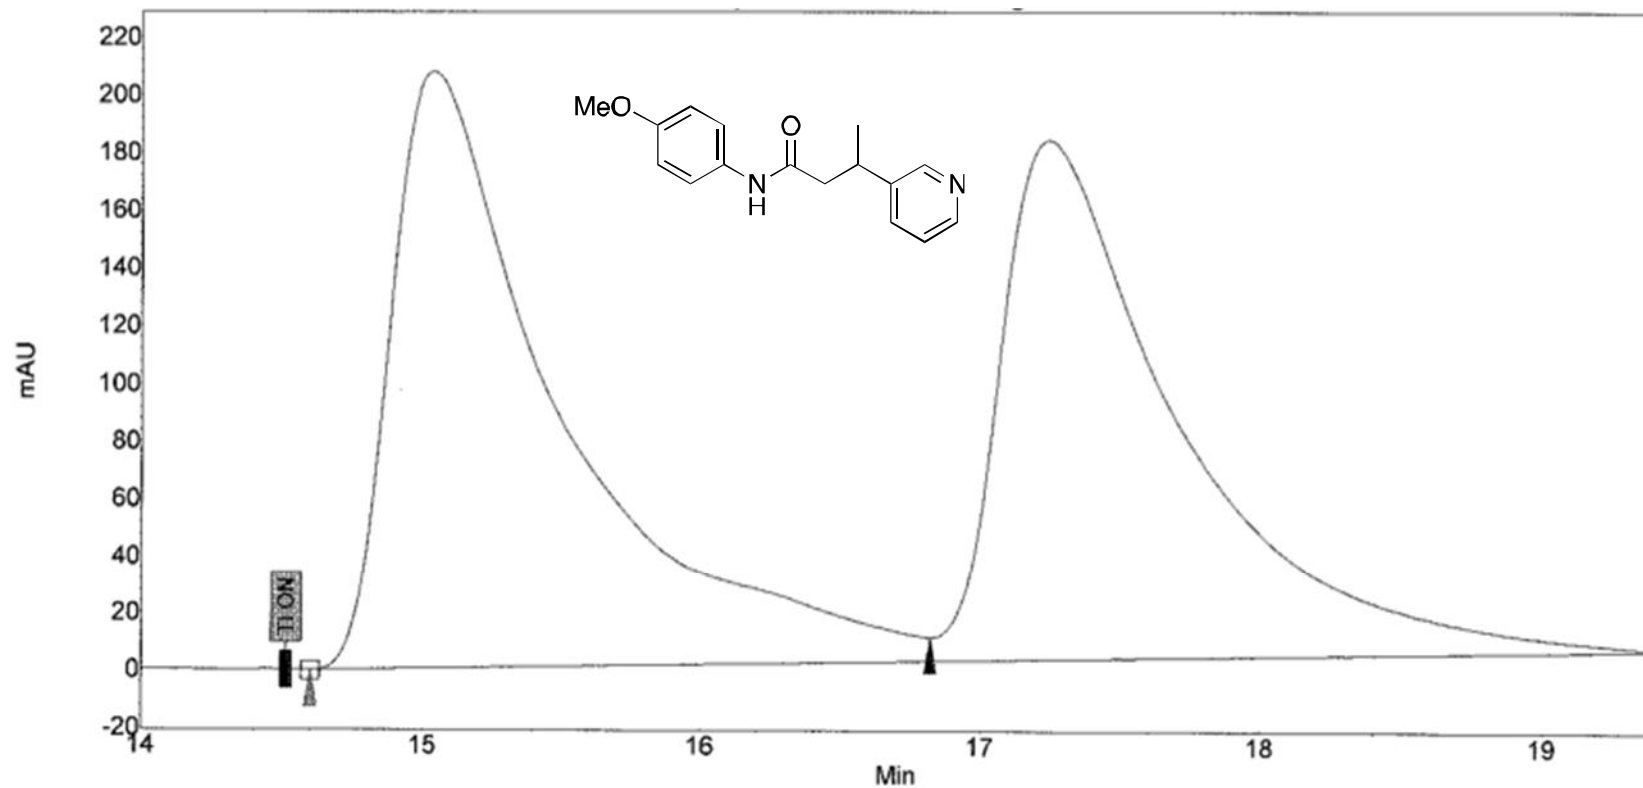

Peak results:

| Index | Name    | Start | Time  | End   | RT Offset | Quantity | Height | Area     | Area    |
|-------|---------|-------|-------|-------|-----------|----------|--------|----------|---------|
|       |         | [Min] | [Min] | [Min] | [Min]     | [% Area] | [μV]   | [μV.Min] | [%]     |
| 1     | UNKNOWN | 14.60 | 15.03 | 16.82 | 0.00      | 52.44    | 207.2  | 147.6    | 52.438  |
| 2     | UNKNOWN | 16.82 | 17.24 | 19.45 | 0.00      | 47.56    | 180.1  | 133.8    | 47.562  |
| Total |         |       |       |       |           | 100.00   | 387.3  | 281.4    | 100.000 |

Analysis of (S)-N-(4-Methoxyphenyl)-3-(pyridin-3-yl)butanamide (12a) using SFC (Column OJ-H, 10% *i*-PrOH, 2 mL, 10\_MPa).

Chromatogram of enantioenriched cross-coupling product:

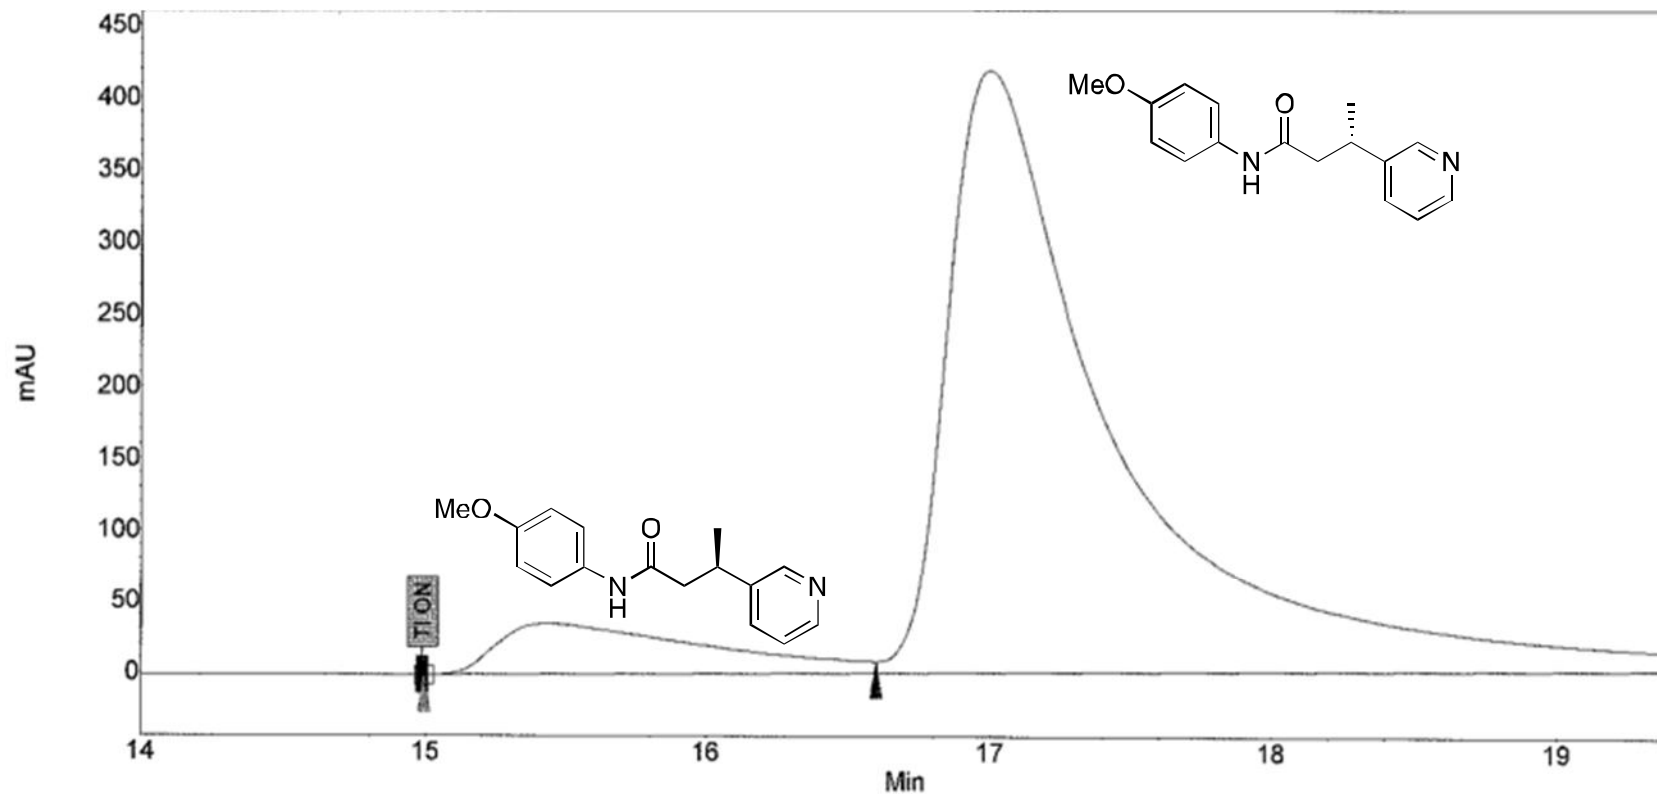

Peak results:

| Index | Name    | Start | Time  | End   | RT Offset | Quantity | Height | Area     | Area    |
|-------|---------|-------|-------|-------|-----------|----------|--------|----------|---------|
|       |         | [Min] | [Min] | [Min] | [Min]     | [% Area] | [μV]   | [μV.Min] | [%]     |
| 1     | UNKNOWN | 14.99 | 15.43 | 16.59 | 0.00      | 9.15     | 35.0   | 30.3     | 9.147   |
| 2     | UNKNOWN | 16.59 | 16.99 | 21.05 | 0.00      | 90.85    | 418.2  | 300.7    | 90.853  |
| Total |         |       |       |       |           | 100.00   | 453.2  | 331.0    | 100.000 |

Analysis of *N*-(4-Methoxyphenyl)-3-(thiophen-3-yl)butanamide (12b) using SFC (Column OJ-H, 10% *i*-PrOH, 2 mL, 10\_MPa).

Chromatogram of racemic cross-coupling product:

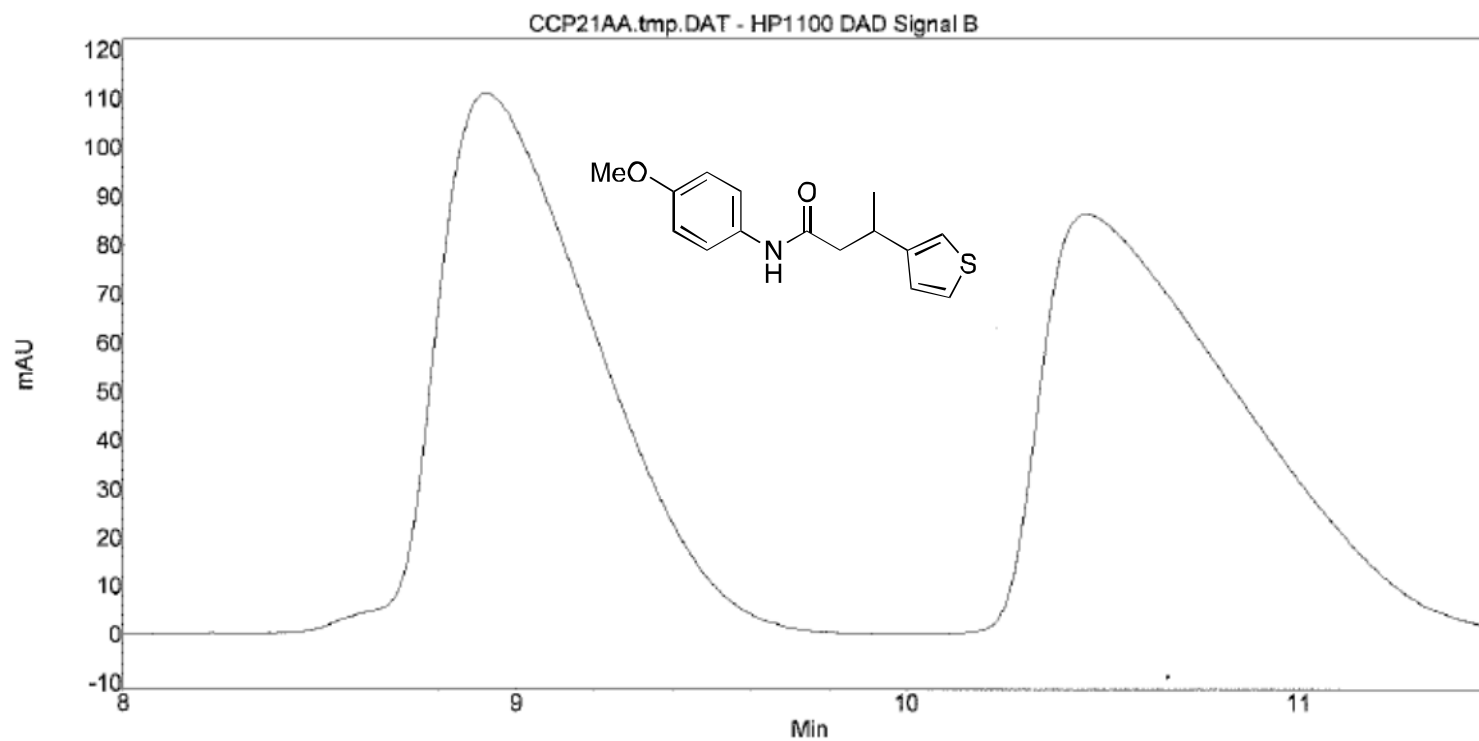

Peak results:

| Index | Name    | Start | Time  | End   | RT Offset | Quantity | Height     | Area           | Area    |
|-------|---------|-------|-------|-------|-----------|----------|------------|----------------|---------|
|       |         | [Min] | [Min] | [Min] | [Min]     | [% Area] | [ $\mu$ V] | [ $\mu$ V.Min] | [%]     |
| 1     | UNKNOWN | 8.34  | 8.92  | 9.97  | 0.00      | 51.06    | 111.1      | 52.3           | 51.056  |
| 2     | UNKNOWN | 10.07 | 10.46 | 11.60 | 0.00      | 48.94    | 86.1       | 50.1           | 48.944  |
| Total |         |       |       |       |           | 100.00   | 197.1      | 102.4          | 100.000 |

Analysis of (*S*)-*N*-(4-Methoxyphenyl)-3-(thiophen-3-yl)butanamide (12b) using SFC (Column OJ-H, 10% *i*-PrOH, 2 mL, 10\_MPa).

Chromatogram of enantioenriched cross-coupling product:

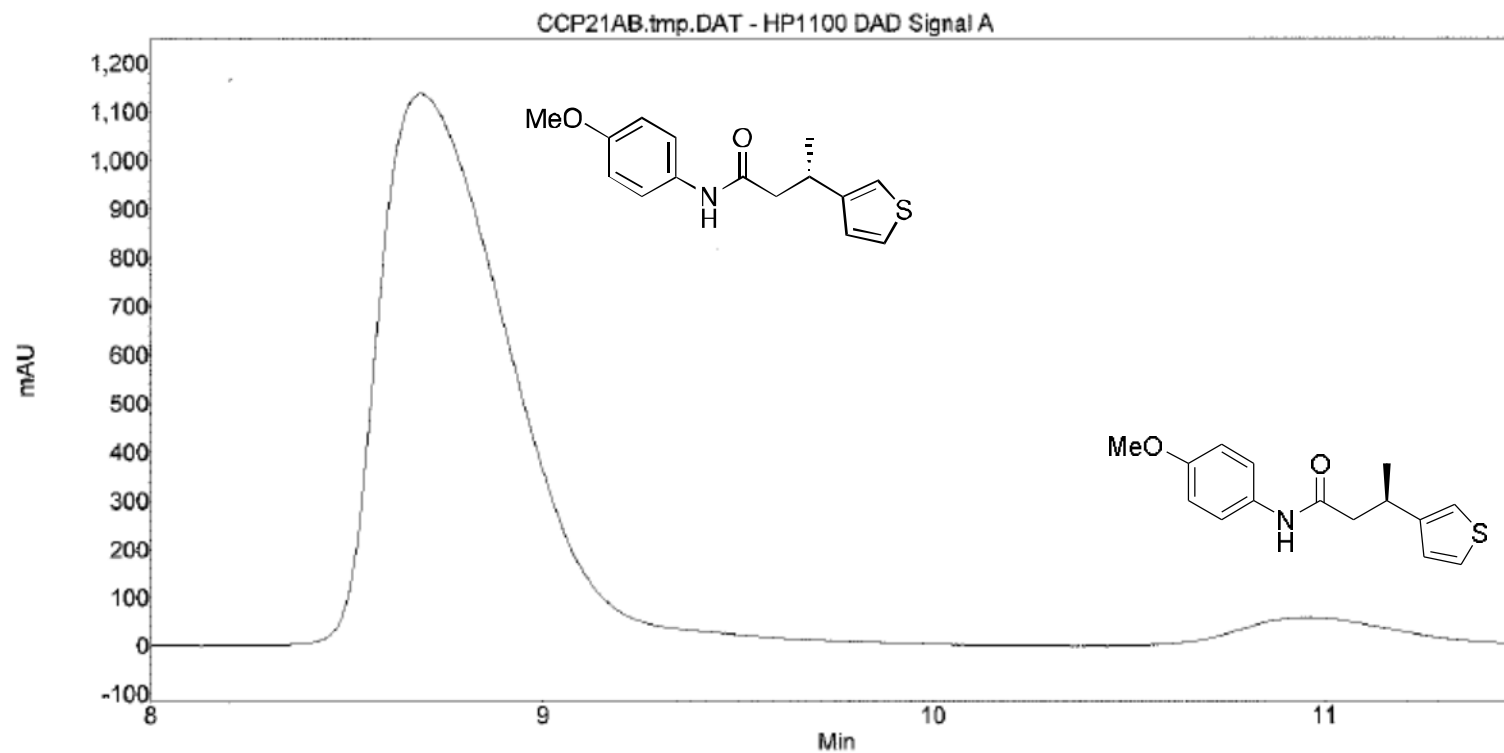

Peak results:

| Index | Name    | Time  | Area      | As   | USP     | Height  | NTP  | USP       | Selectivity | Signal to Noise Ratio | Width |
|-------|---------|-------|-----------|------|---------|---------|------|-----------|-------------|-----------------------|-------|
|       |         | [Min] | [mAU*min] |      |         | [mAU]   |      |           |             |                       | [Min] |
| 1     | UNKNOWN | 8.69  | 447.8291  | 1.75 | 1135.84 | 3287.07 | 0.00 | 3322.9064 | 0.37        |                       |       |
| 2     | UNKNOWN | 10.95 | 25.5115   | 1.28 | 56.88   | 3782.34 | 1.26 | 166.3971  | 0.43        |                       |       |
| Total |         |       | 473.3406  |      |         |         |      |           |             |                       |       |

Analysis of *N*-(4-Methoxyphenyl)-3-(thiophen-2-yl)butanamide (12c) using SFC (Column OJ-H, 10% *i*-PrOH, 2 mL, 10\_MPa).

Chromatogram of racemic cross-coupling product:

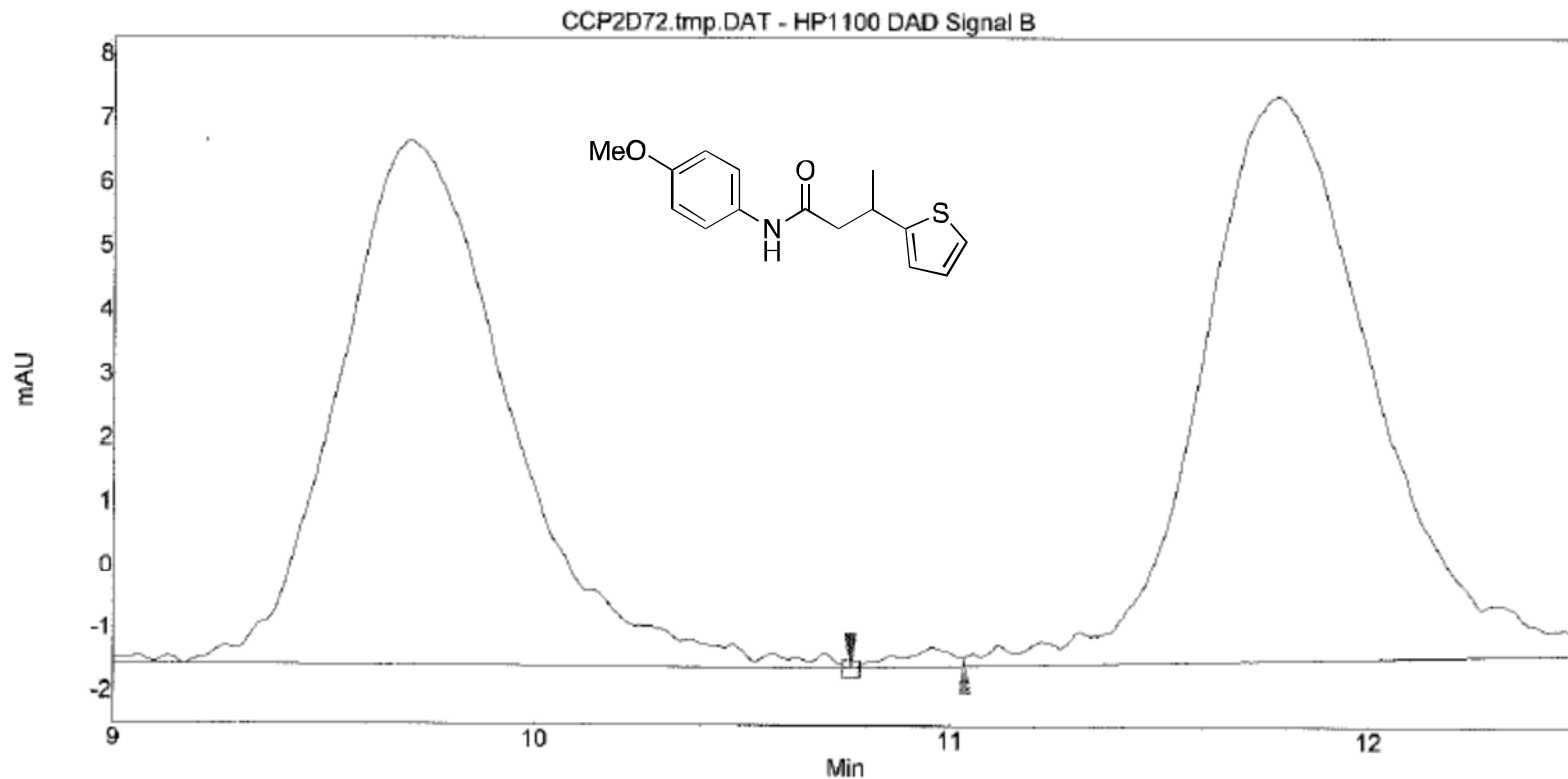

Peak results:

| Index | Name    | Start | Time  | End   | RT Offset | Quantity | Height     | Area           | Area    |
|-------|---------|-------|-------|-------|-----------|----------|------------|----------------|---------|
|       |         | [Min] | [Min] | [Min] | [Min]     | [% Area] | [ $\mu$ V] | [ $\mu$ V.Min] | [%]     |
| 1     | UNKNOWN | 8.99  | 9.70  | 10.76 | 0.00      | 47.66    | 8.2        | 3.9            | 47.657  |
| 2     | UNKNOWN | 11.03 | 11.78 | 12.86 | 0.00      | 52.34    | 8.8        | 4.3            | 52.343  |
| Total |         |       |       |       |           | 100.00   | 17.1       | 8.2            | 100.000 |

Analysis of (*S*)-*N*-(4-Methoxyphenyl)-3-(thiophen-2-yl)butanamide (12c) using SFC (Column OJ-H, 10% *i*-PrOH, 2 mL, 10\_MPa).

Chromatogram of enantioenriched cross-coupling product:

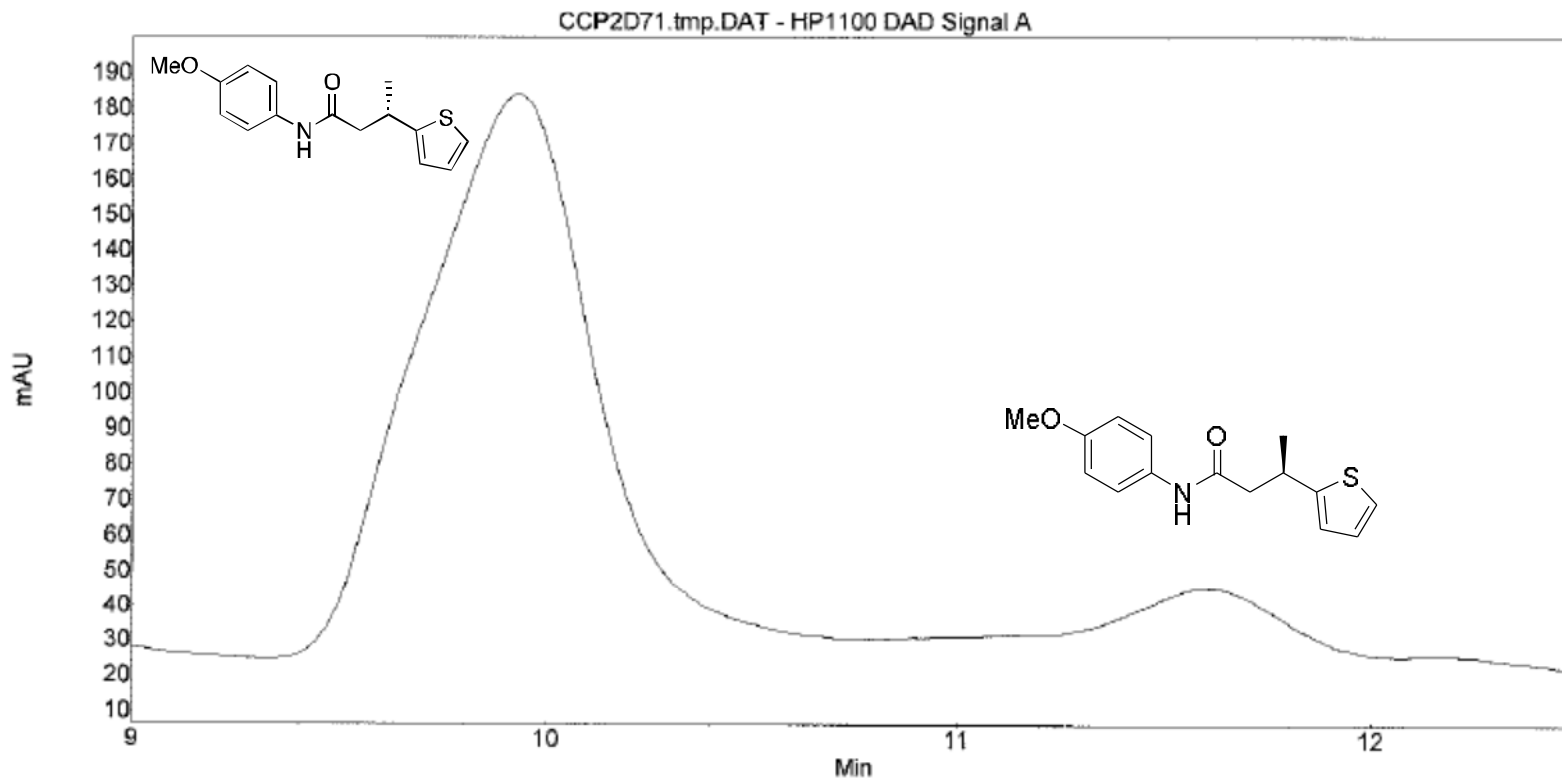

Peak results:

| Index | Name    | Time  | Area      | As USP | Height | NTP USP | Selectivity | Signal to Noise Ratio | Width |
|-------|---------|-------|-----------|--------|--------|---------|-------------|-----------------------|-------|
|       |         | [Min] | [mAU*min] |        | [mAU]  |         |             |                       | [Min] |
| 1     | UNKNOWN | 9.93  | 78.6173   | 1.16   | 158.14 | 2590.72 | 0.00        | 14.2280               | 0.47  |
| 2     | UNKNOWN | 11.61 | 8.3300    | 0.66   | 16.58  | 5105.11 | 1.17        | 1.4915                | 0.38  |
| Total |         |       | 86.9472   |        |        |         |             |                       |       |



Analysis of *N*-(4-Methoxyphenyl)-3-(quinolin-6-yl)butanamide (12d) using SFC (Column OJ-H, 10% *i*-PrOH, 2 mL, 10\_MPa).

Chromatogram of racemic cross-coupling product:

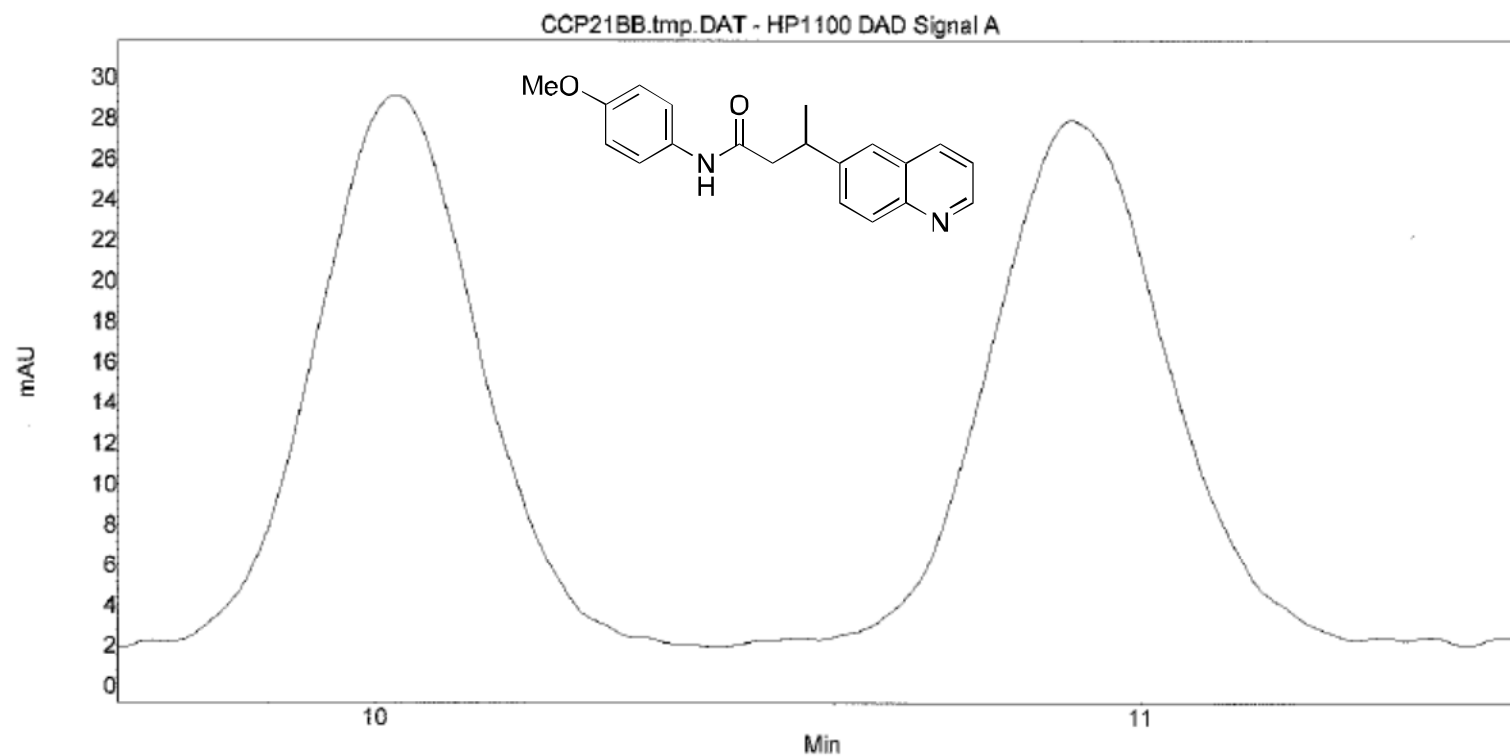

Peak results:

| Index | Name    | Time  | Area      | As USP | Height | NTP USP  | Selectivity | Signal to Noise Ratio | Width |
|-------|---------|-------|-----------|--------|--------|----------|-------------|-----------------------|-------|
|       |         | [Min] | [mAU*min] |        | [mAU]  |          |             |                       | [Min] |
| 1     | UNKNOWN | 10.03 | 6.8914    | 1.06   | 27.30  | 10297.71 | 0.00        | 36.1278               | 0.23  |
| 2     | UNKNOWN | 10.91 | 7.0392    | 1.09   | 25.89  | 10839.77 | 1.09        | 34.2602               | 0.25  |
| Total |         |       | 13.9305   |        |        |          |             |                       |       |

Analysis of (*S*)-*N*-(4-Methoxyphenyl)-3-(quinolin-6-yl)butanamide (12d) using SFC (Column OJ-H, 10% *i*-PrOH, 2 mL, 10\_MPa).

Chromatogram of enantioenriched cross-coupling product:

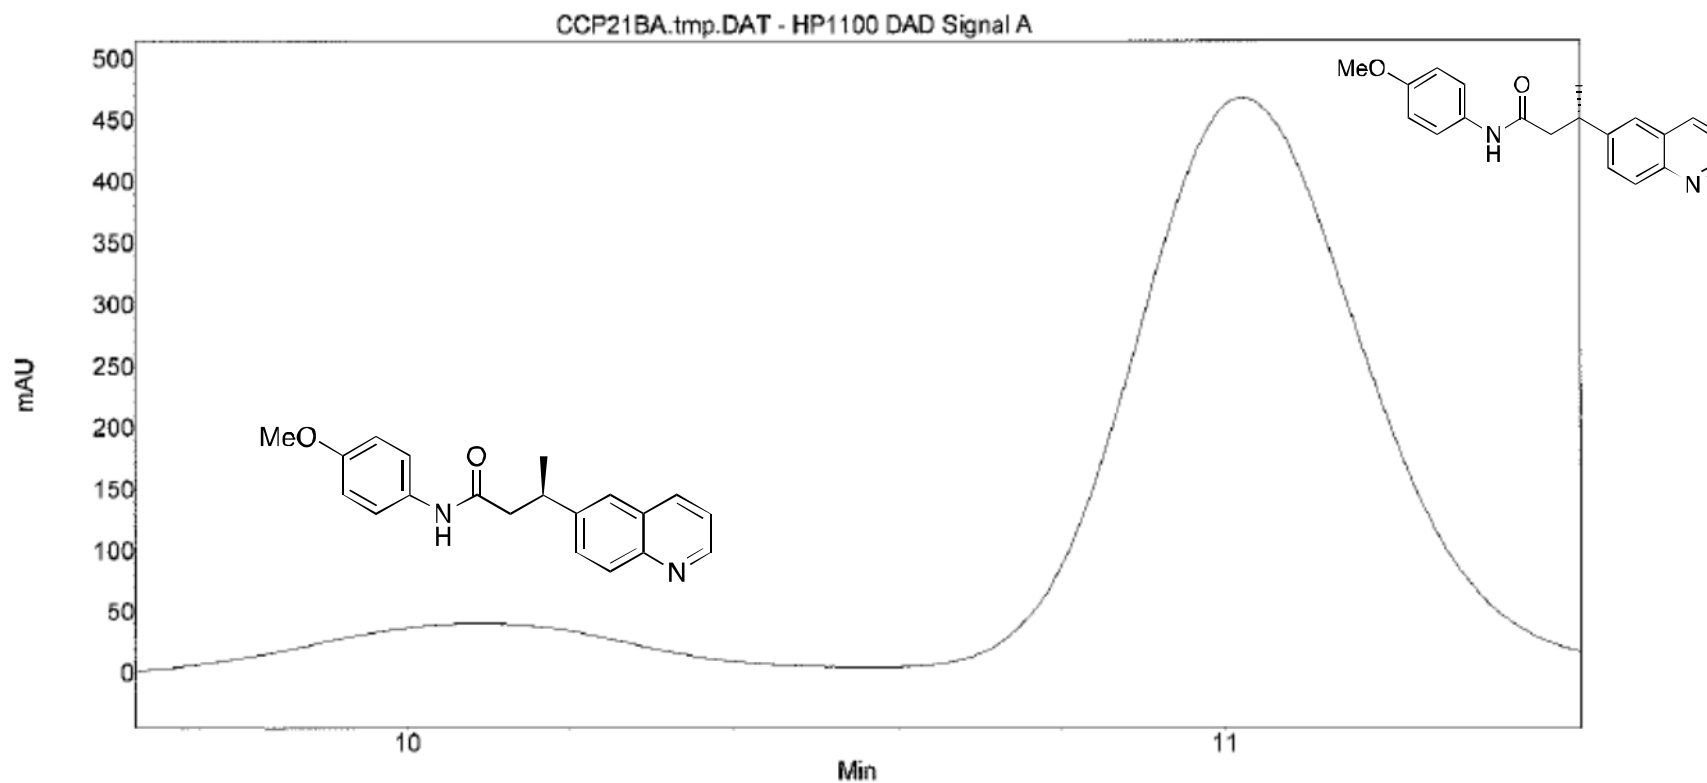

Peak results:

| Index | Name    | Time  | Area      | As. USP | Height | NTP USP | Selectivity | Signal to Noise Ratio | Width |
|-------|---------|-------|-----------|---------|--------|---------|-------------|-----------------------|-------|
|       |         | [Min] | [mAU*min] |         | [mAU]  |         |             |                       | [Min] |
| 1     | UNKNOWN | 10.09 | 13.5422   | 1.00    | 34.26  | 4080.30 | 0.00        | 52.5473               | 0.39  |
| 2     | UNKNOWN | 11.02 | 148.1432  | 1.13    | 461.15 | 7450.46 | 1.09        | 707.3960              | 0.30  |
| Total |         |       | 161.6853  |         |        |         |             |                       |       |

Analysis of *tert*-Butyl-5-(4-((4-methoxyphenyl)amino)-4-oxobutan-2-yl)-1*H*-indole-1-carboxylate (12e) using SFC (Column AS-H, 10% *i*-PrOH, 2 mL, 10\_MPa).

Chromatogram of oxidized racemic cross-coupling product:

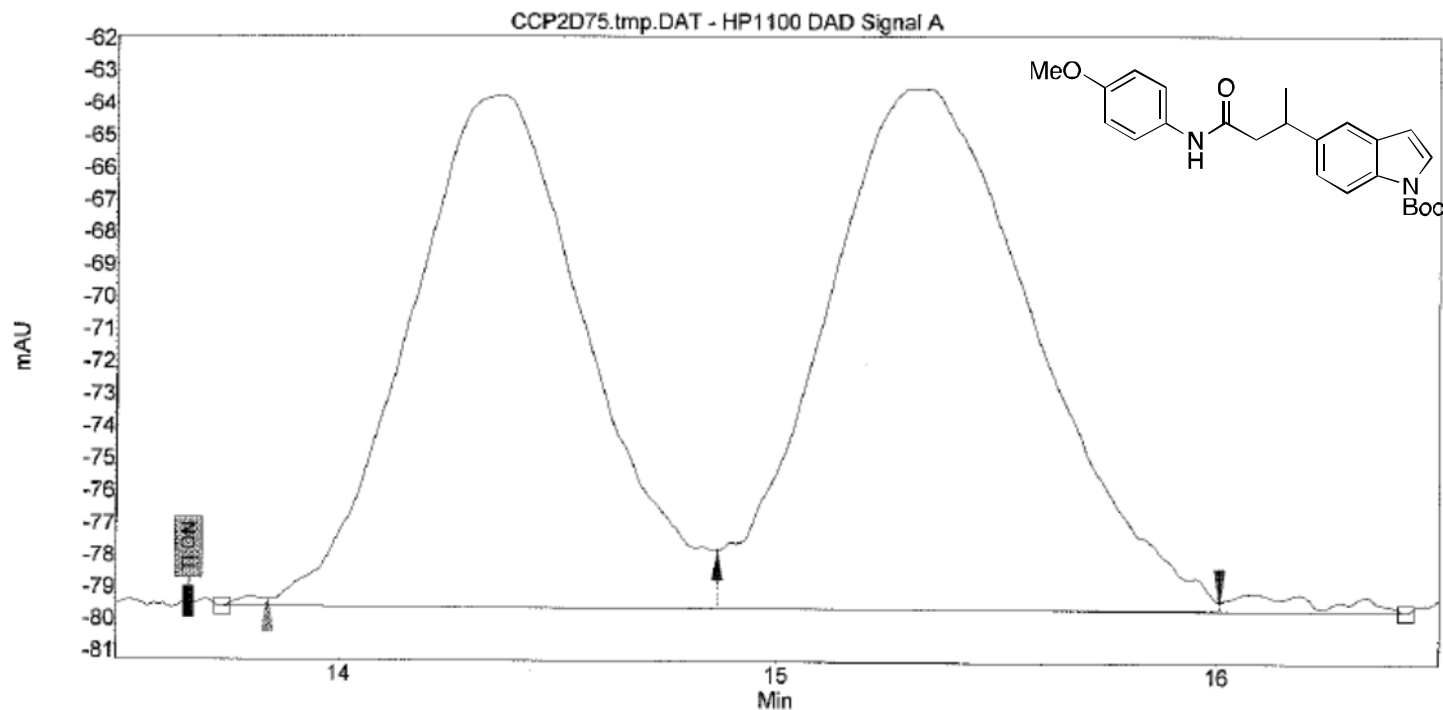

Peak results:

| Index | Name    | Time  | Area      | As_USP | Height | NTP_USP | Selectivity | Signal to Noise Ratio | Width |
|-------|---------|-------|-----------|--------|--------|---------|-------------|-----------------------|-------|
|       |         | [Min] | [mAU*min] |        | [mAU]  |         |             |                       | [Min] |
| 1     | UNKNOWN | 14.37 | 7.5341    | 1.03   | 15.86  | 6497.56 | 0.00        | 0.1737                | 0.44  |
| 2     | UNKNOWN | 15.31 | 8.8954    | 1.25   | 16.08  | 5345.51 | 1.06        | 0.1760                | 0.51  |
| Total |         |       | 16.4295   |        |        |         |             |                       |       |

Analysis of (*S*)-*tert*-Butyl-5-(4-(4-methoxyphenyl)amino)-4-oxobutan-2-yl)-1*H*-indole-1-carboxylate (12e) using SFC (Column AS-H, 10% *i*-PrOH, 2 mL, 10\_MPa).

Chromatogram of enantioenriched cross-coupling product:

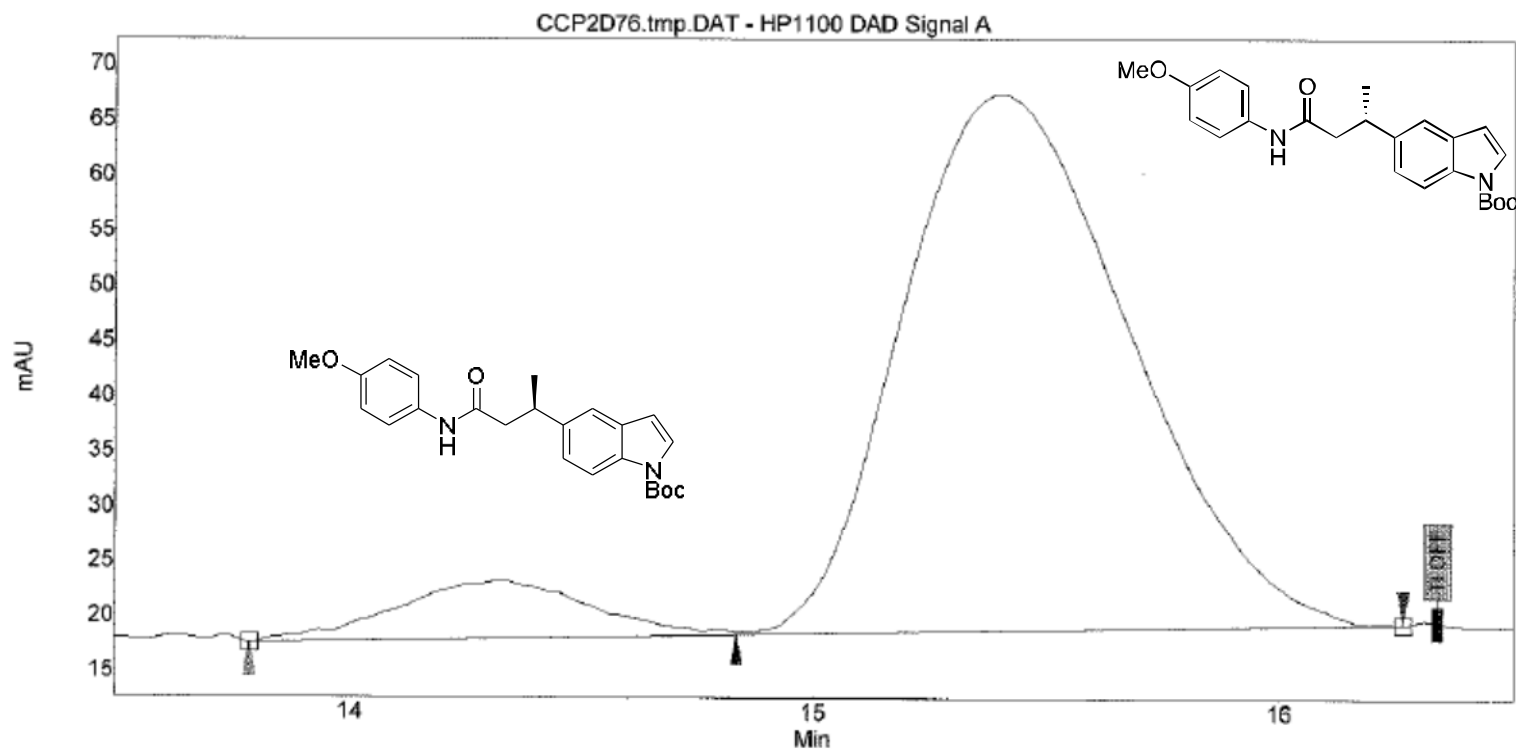

Peak results:

| Index | Name    | Time  | Area      | As. USP | Height | NTP USP | Selectivity | Signal to Noise Ratio | Width |
|-------|---------|-------|-----------|---------|--------|---------|-------------|-----------------------|-------|
|       |         | [Min] | [mAU*min] |         | [mAU]  |         |             |                       | [Min] |
| 1     | UNKNOWN | 14.31 | 2.5370    | 1.08    | 5.19   | 6756.43 | 0.00        | 1.1327                | 0.44  |
| 2     | UNKNOWN | 15.40 | 27.3814   | 1.28    | 48.59  | 4781.35 | 1.08        | 10.5966               | 0.54  |
| Total |         |       | 29.9184   |         |        |         |             |                       |       |

Analysis of 3-(4-Fluorophenyl)-*N*-(4-methoxyphenyl)butanamide (13a) using SFC (Column OJ-H, 10% *i*-PrOH, 2 mL, 10 MPa).

Chromatogram of racemic cross-coupling product:

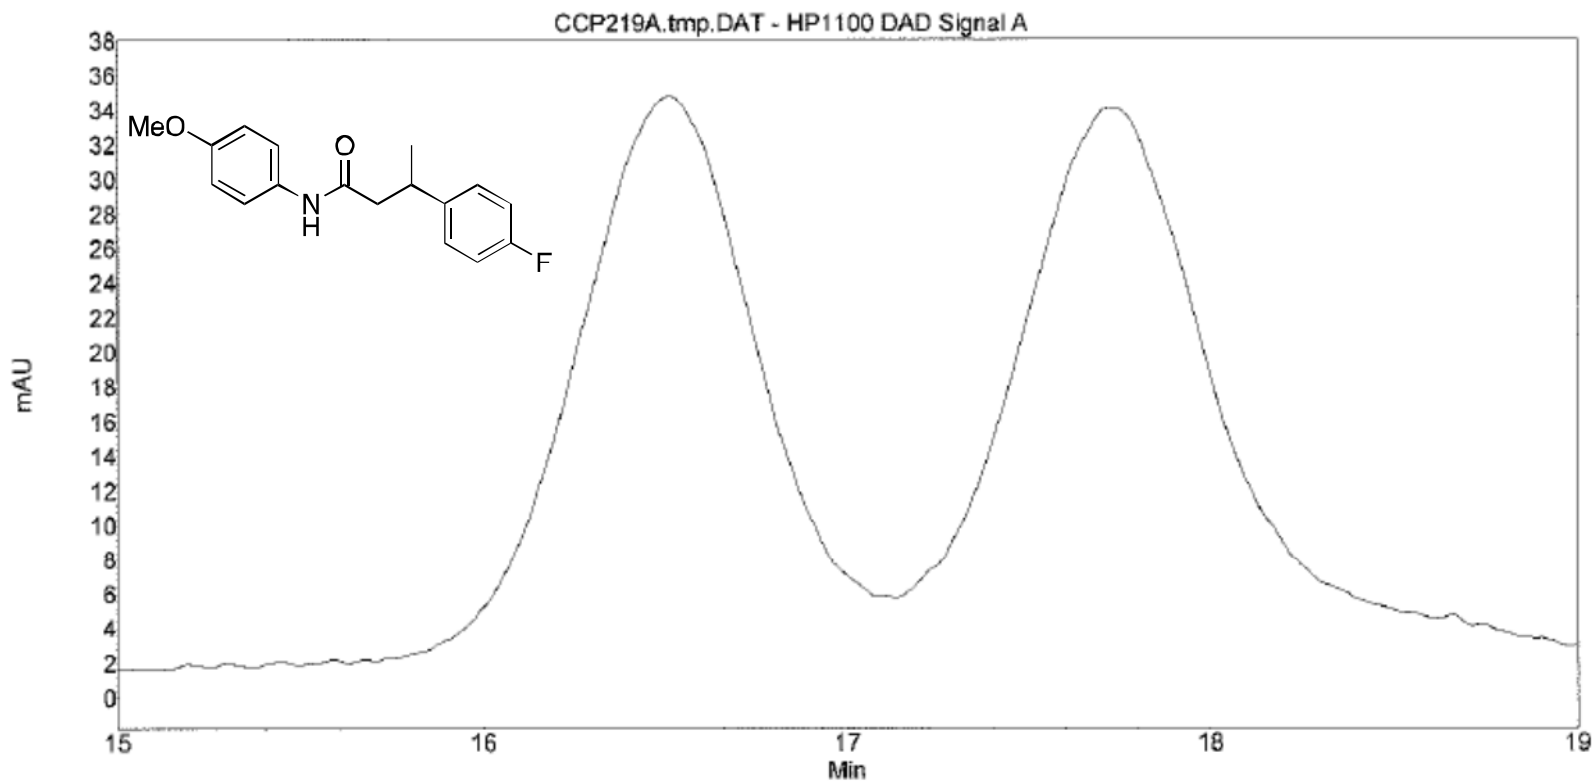

Peak results:

| Index | Name    | Time  | Area      | As USP | Height | NTP USP | Selectivity | Signal to Noise Ratio | Width |
|-------|---------|-------|-----------|--------|--------|---------|-------------|-----------------------|-------|
|       |         | [Min] | [mAU*min] |        | [mAU]  |         |             |                       | [Min] |
| 1     | UNKNOWN | 16.51 | 18.9899   | 1.04   | 32.52  | 5116.39 | 0.00        | 78.5507               | 0.54  |
| 2     | UNKNOWN | 17.71 | 20.1729   | 1.35   | 31.49  | 5498.06 | 1.07        | 76.0481               | 0.56  |
| Total |         |       | 39.1628   |        |        |         |             |                       |       |

Analysis of (S)-3-(4-Fluorophenyl)-N-(4-methoxyphenyl)butanamide (13a) using SFC (Column OJ-H, 10% *i*-PrOH, 2 mL, 10 MPa).

Chromatogram of enantioenriched cross-coupling product:

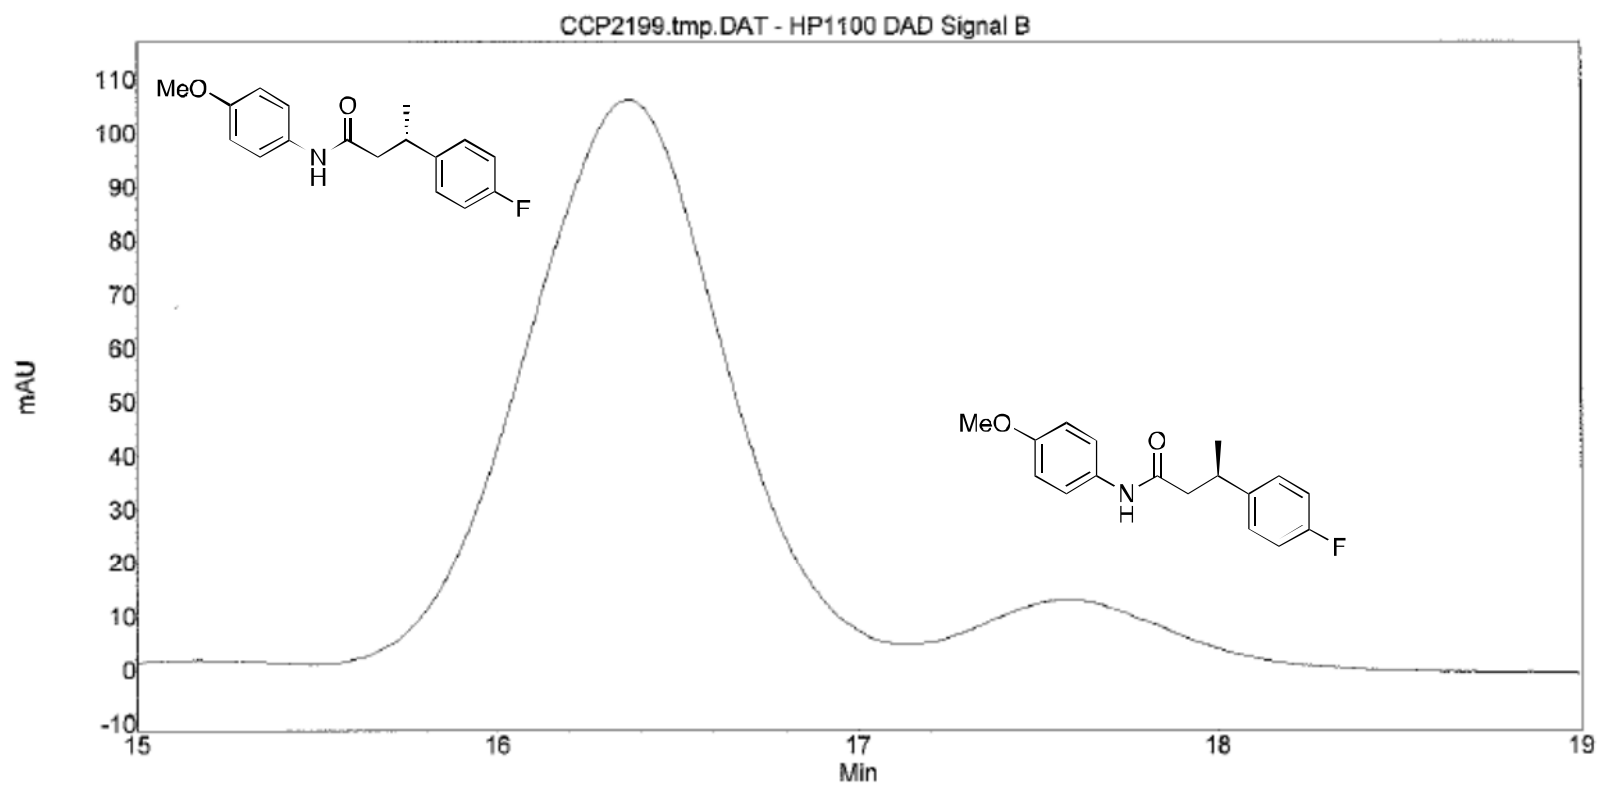

Peak results:

| Index | Name    | Start | Time  | End   | RT Offset | Quantity | Height     | Area           | Area    |
|-------|---------|-------|-------|-------|-----------|----------|------------|----------------|---------|
|       |         | [Min] | [Min] | [Min] | [Min]     | [% Area] | [ $\mu$ V] | [ $\mu$ V.Min] | [%]     |
| 1     | UNKNOWN | 15.49 | 16.37 | 17.12 | 0.00      | 93.20    | 104.2      | 65.6           | 93.201  |
| 2     | UNKNOWN | 17.12 | 17.59 | 18.00 | 0.00      | 6.80     | 9.5        | 4.8            | 6.799   |
| Total |         |       |       |       |           | 100.00   | 113.6      | 70.4           | 100.000 |

Analysis of 3-(4-Fluorophenyl)-*N*-phenylbutanamide (13b) using SFC (Column OJ-H, 10% *i*-PrOH, 2 mL, 10\_MPa).

Chromatogram of racemic cross-coupling product:

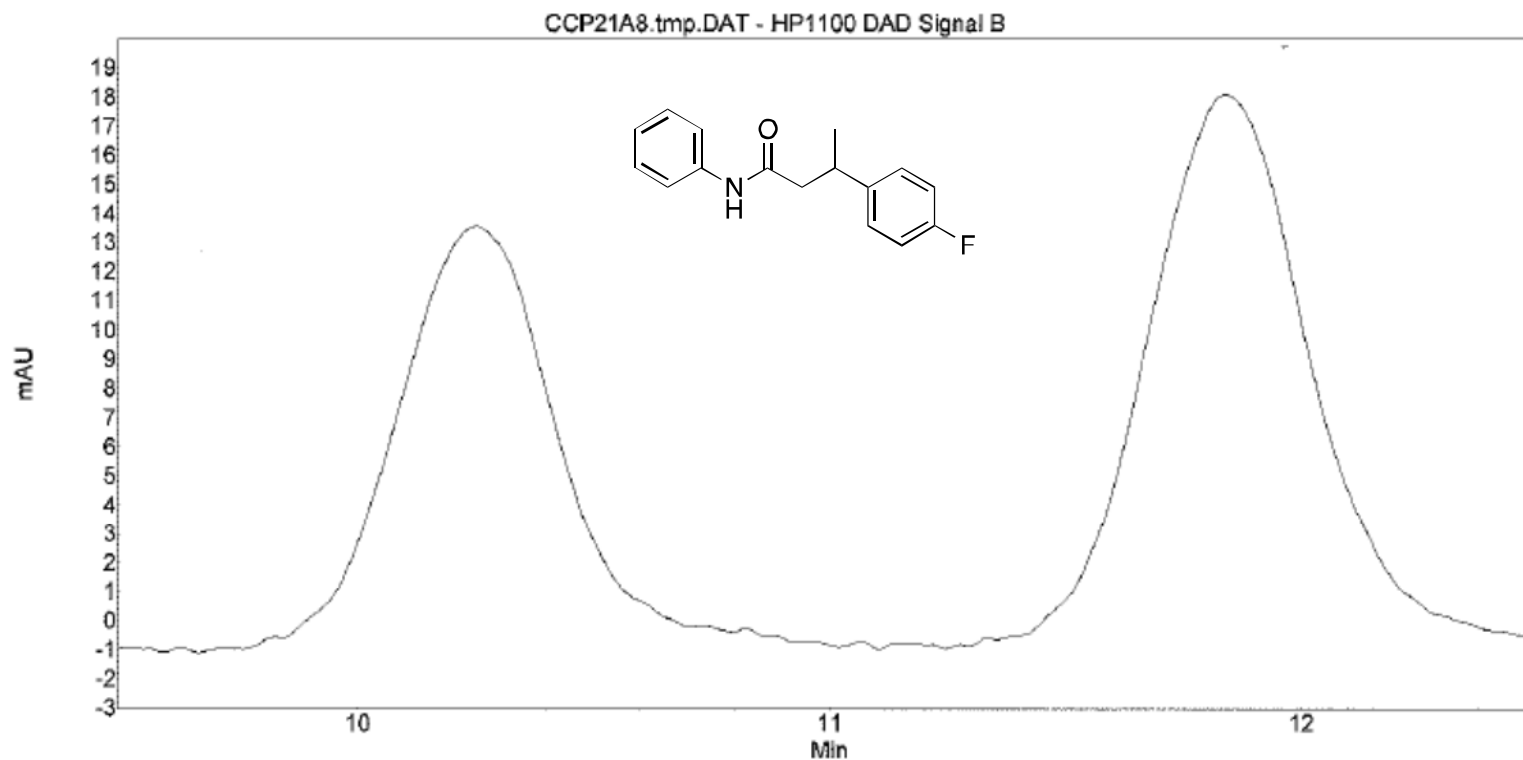

Peak results:

| Index | Name    | Start | Time  | End   | RT Offset | Quantity | Height     | Area           | Area    |
|-------|---------|-------|-------|-------|-----------|----------|------------|----------------|---------|
|       |         | [Min] | [Min] | [Min] | [Min]     | [% Area] | [ $\mu$ V] | [ $\mu$ V.Min] | [%]     |
| 1     | UNKNOWN | 9.67  | 10.25 | 11.25 | 0.00      | 49.55    | 14.6       | 5.9            | 49.552  |
| 2     | UNKNOWN | 11.30 | 11.84 | 12.17 | 0.00      | 50.45    | 17.2       | 6.0            | 50.448  |
| Total |         |       |       |       |           | 100.00   | 31.8       | 11.9           | 100.000 |

Analysis of (*S*)-3-(4-Fluorophenyl)-*N*-phenylbutanamide (13b) using SFC (Column OJ-H, 10% *i*-PrOH, 2 mL, 10\_MPa).

Chromatogram of enantioenriched cross-coupling product:

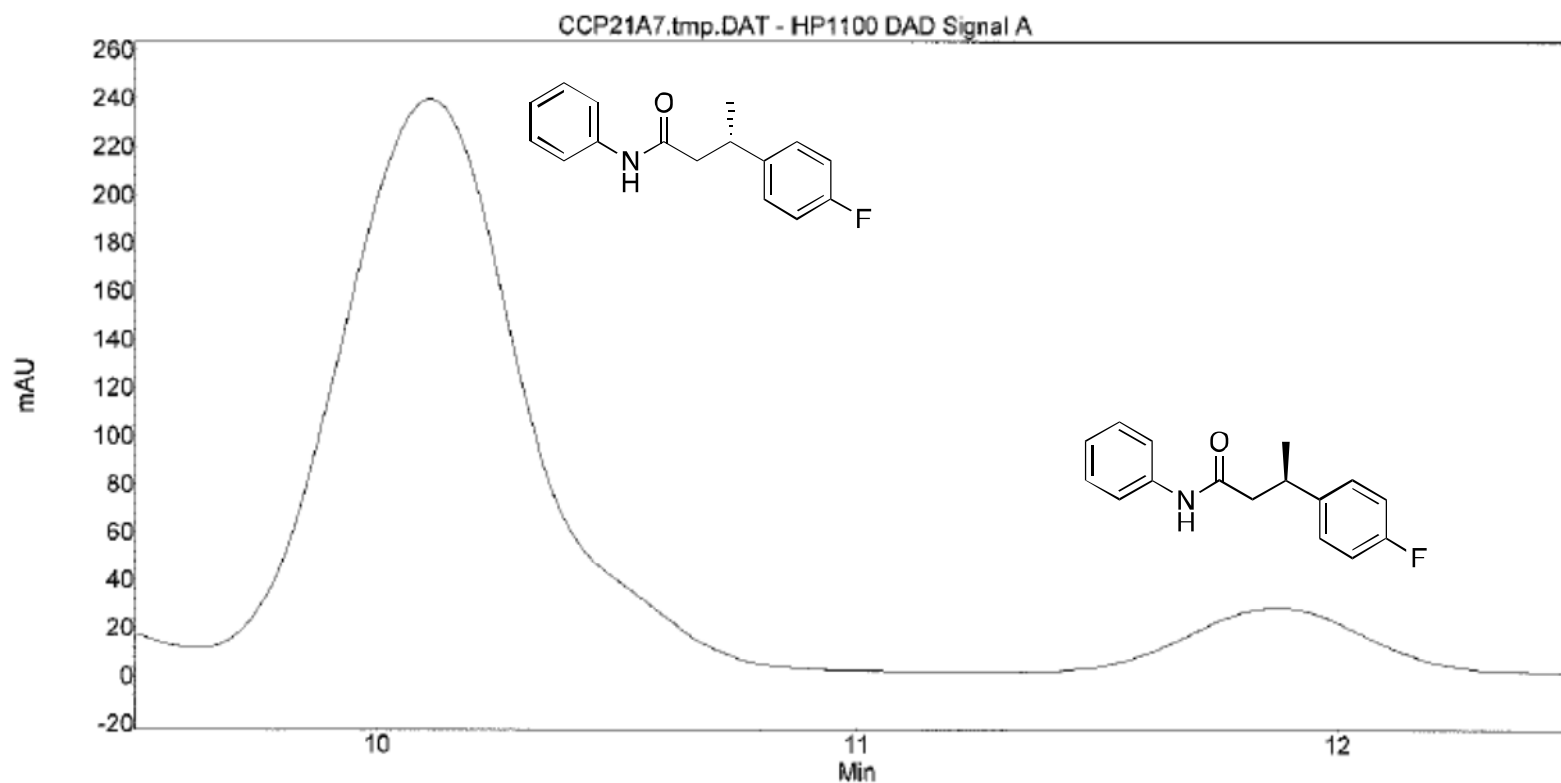

Peak results:

| Index | Name    | Time  | Area      | As USP | Height | NTP USP | Selectivity | Signal to Noise Ratio | Width |
|-------|---------|-------|-----------|--------|--------|---------|-------------|-----------------------|-------|
|       |         | [Min] | [mAU*min] |        | [mAU]  |         |             |                       | [Min] |
| 1     | UNKNOWN | 10.11 | 100.9355  | 1.17   | 231.42 | 3752.69 | 0.00        | 558.9254              | 0.39  |
| 2     | UNKNOWN | 11.88 | 9.4388    | 0.97   | 24.43  | 5686.68 | 1.17        | 59.0135               | 0.37  |
| Total |         |       | 110.3743  |        |        |         |             |                       |       |



Analysis of *N*-Ethyl-3-(4-fluorophenyl)-*N*-(*o*-tolyl)butanamide (13c) using SFC (Column OD-H, 10% *i*-PrOH, 2 mL, 10 MPa).

Chromatogram of racemic cross-coupling product:

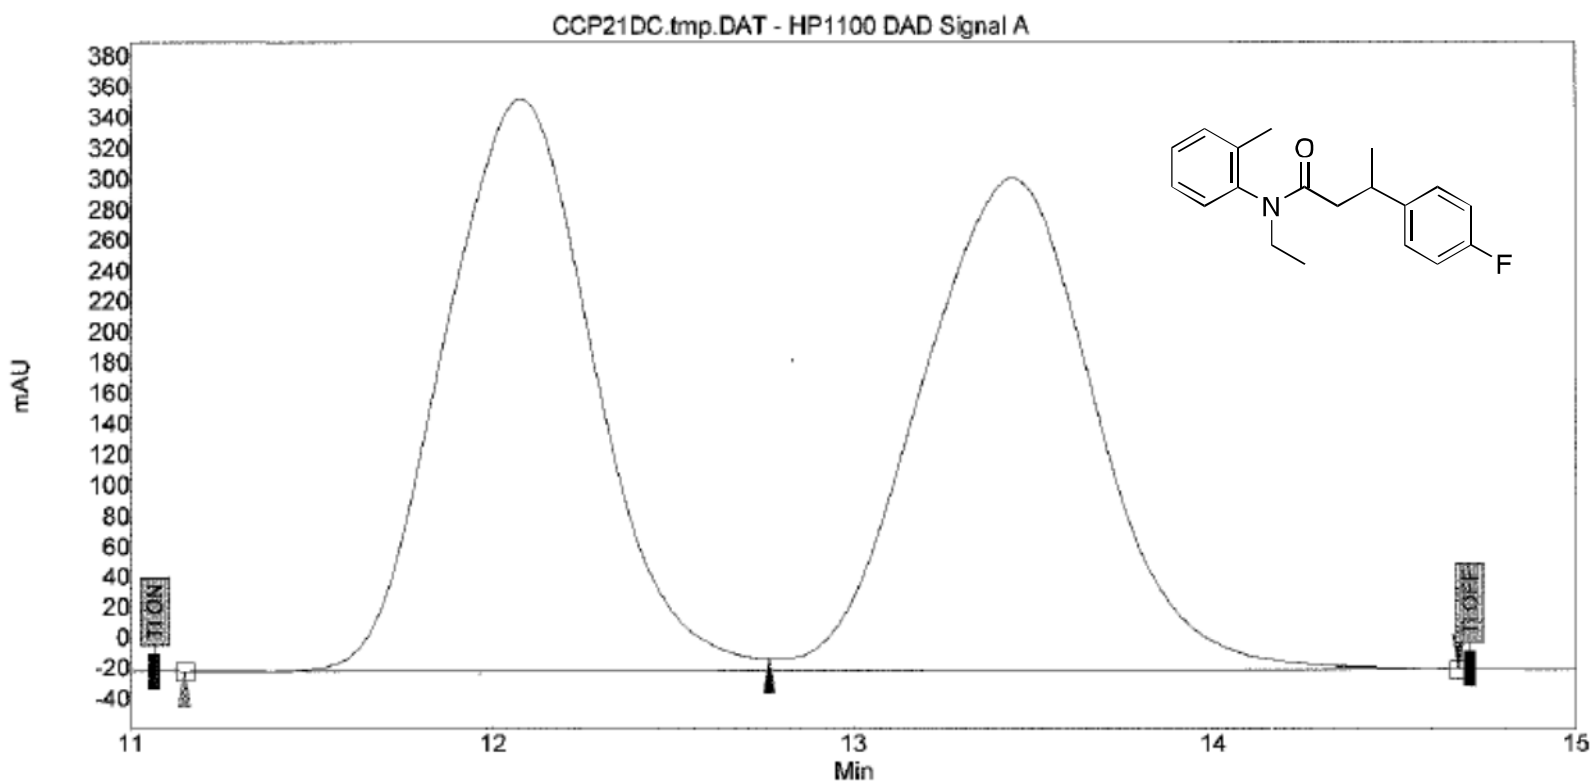

Peak results:

| Index | Name    | Time  | Area      | As. USP | Height | NTP USP | Selectivity | Signal to Noise Ratio | Width |
|-------|---------|-------|-----------|---------|--------|---------|-------------|-----------------------|-------|
|       |         | [Min] | [mAU*min] |         | [mAU]  |         |             |                       | [Min] |
| 1     | UNKNOWN | 12.08 | 179.9148  | 1.09    | 373.88 | 3878.89 | 0.00        | 258.6821              | 0.45  |
| 2     | UNKNOWN | 13.44 | 181.3438  | 1.05    | 321.64 | 3596.99 | 1.11        | 222.5381              | 0.53  |
| Total |         |       | 361.2587  |         |        |         |             |                       |       |

Analysis of (*S*)-*N*-Ethyl-3-(4-fluorophenyl)-*N*-(*o*-tolyl)butanamide (13c) using SFC (Column OD-H, 10% *i*-PrOH, 2 mL, 10 MPa).

Chromatogram of enantioenriched cross-coupling product:

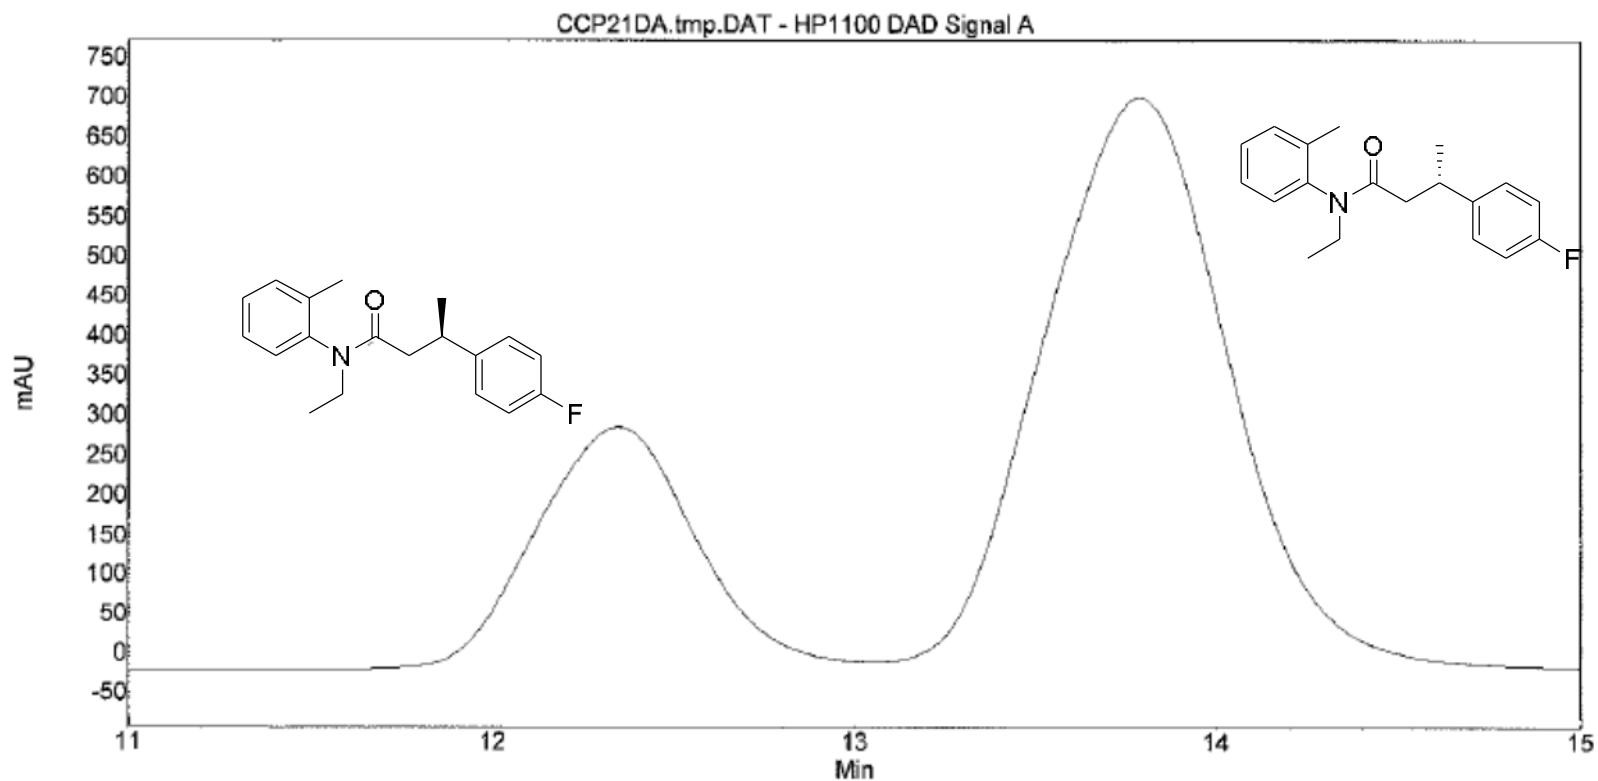

Peak results:

| Index | Name    | Time  | Area      | As. USP | Height | NTP USP | Selectivity | Signal to Noise Ratio | Width |
|-------|---------|-------|-----------|---------|--------|---------|-------------|-----------------------|-------|
|       |         | [Min] | [mAU*min] |         | [mAU]  |         |             |                       | [Min] |
| 1     | UNKNOWN | 12.35 | 157.2671  | 1.09    | 305.53 | 3622.18 | 0.00        | 401.1404              | 0.48  |
| 2     | UNKNOWN | 13.79 | 425.6889  | 1.06    | 719.02 | 3415.83 | 1.12        | 944.0235              | 0.56  |
| Total |         |       | 582.9560  |         |        |         |             |                       |       |

Analysis of *N*-Cyclohexyl-3-(4-fluorophenyl)butanamide (13d) using SFC (Column AS-H, 10% *i*-PrOH, 2 mL, 10\_MPa).

Chromatogram of racemic cross-coupling product:

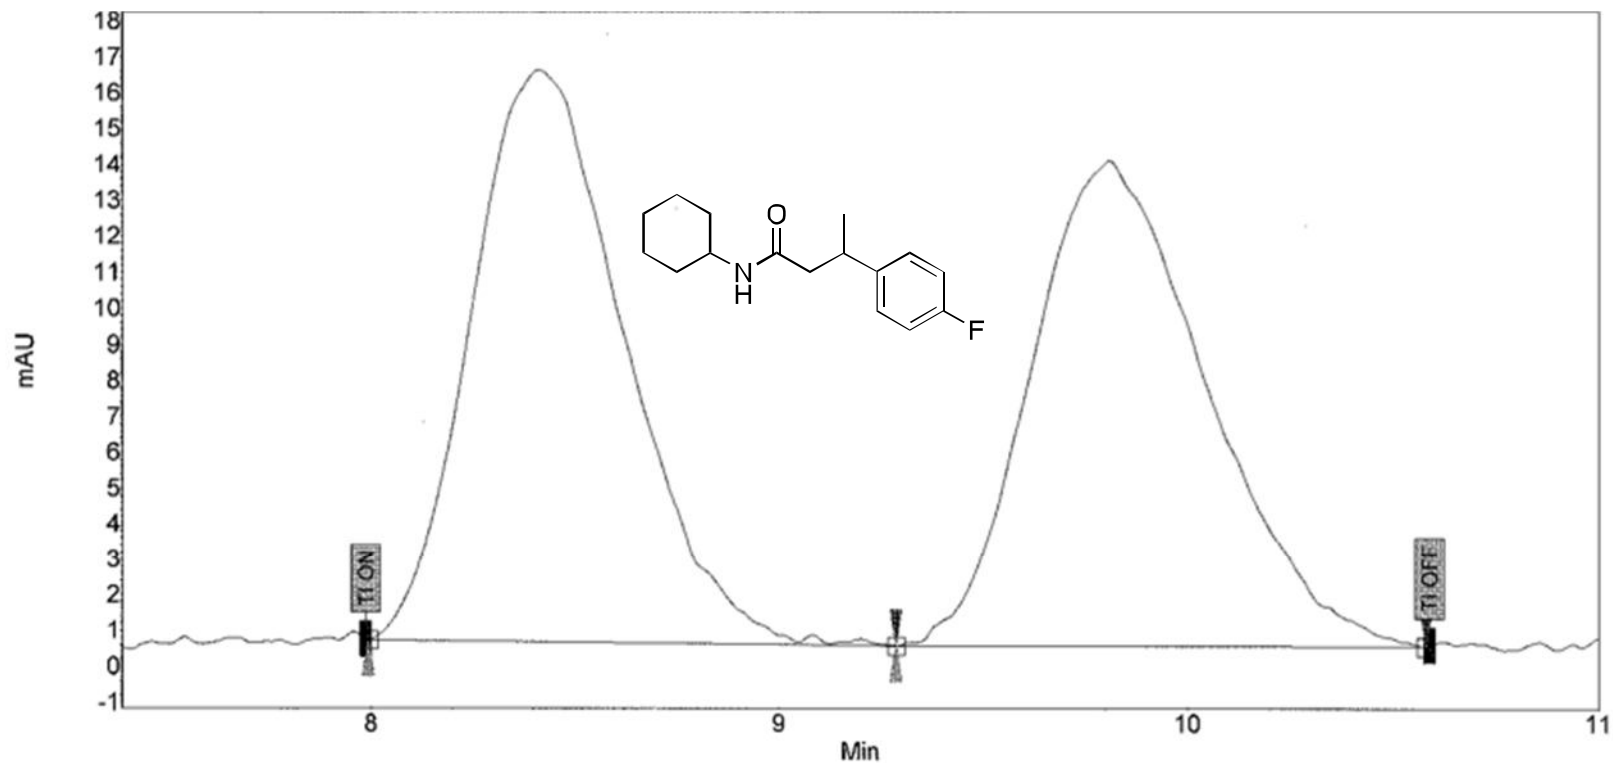

Peak results:

| Index | Name    | Time  | Area      | As. USP | Height | NTP USP | Selectivity | Signal to Noise Ratio | Width |
|-------|---------|-------|-----------|---------|--------|---------|-------------|-----------------------|-------|
|       |         | [Min] | [mAU*min] |         | [mAU]  |         |             |                       | [Min] |
| 1     | UNKNOWN | 8.41  | 6.9799    | 1.22    | 15.95  | 2532.91 | 0.00        | 7.7936                | 0.41  |
| 2     | UNKNOWN | 9.81  | 6.7232    | 1.23    | 13.53  | 2665.14 | 1.17        | 6.6117                | 0.46  |
| Total |         |       | 13.7031   |         |        |         |             |                       |       |

Analysis of (*S*)-*N*-Cyclohexyl-3-(4-fluorophenyl)butanamide (13d) using SFC (Column AS-H, 10% *i*-PrOH, 2 mL, 10\_MPa).

Chromatogram of enantioenriched cross-coupling product:

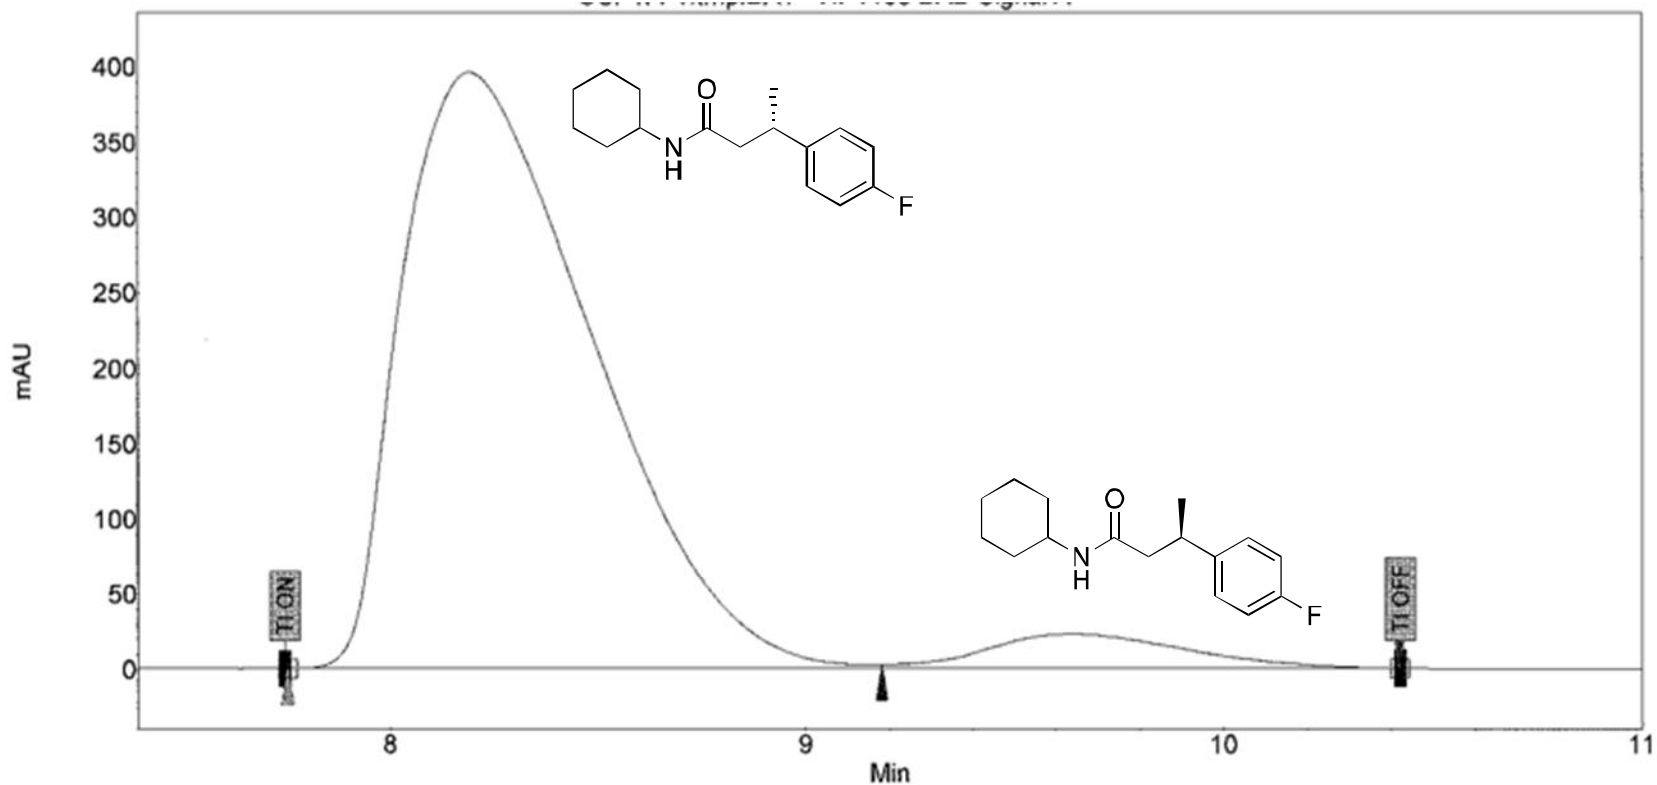

Peak results:

| Index | Name    | Time  | Area      | As. USP | Height | NTP USP | Selectivity | Signal to Noise Ratio | Width |
|-------|---------|-------|-----------|---------|--------|---------|-------------|-----------------------|-------|
|       |         | [Min] | [mAU*min] |         | [mAU]  |         |             |                       | [Min] |
| 1     | UNKNOWN | 8.19  | 210.8852  | 1.70    | 395.54 | 1439.67 | 0.00        | 214.7236              | 0.52  |
| 2     | UNKNOWN | 9.64  | 12.3722   | 1.19    | 22.53  | 2036.61 | 1.18        | 12.2331               | 0.52  |
| Total |         |       | 223.2574  |         |        |         |             |                       |       |

Analysis of *N*-Cyclohexyl-3-(4-fluorophenyl)pentanamide (13e) using SFC (Column AS-H, 10% *i*-PrOH, 2 mL, 10\_MPa).

Chromatogram of racemic cross-coupling product:

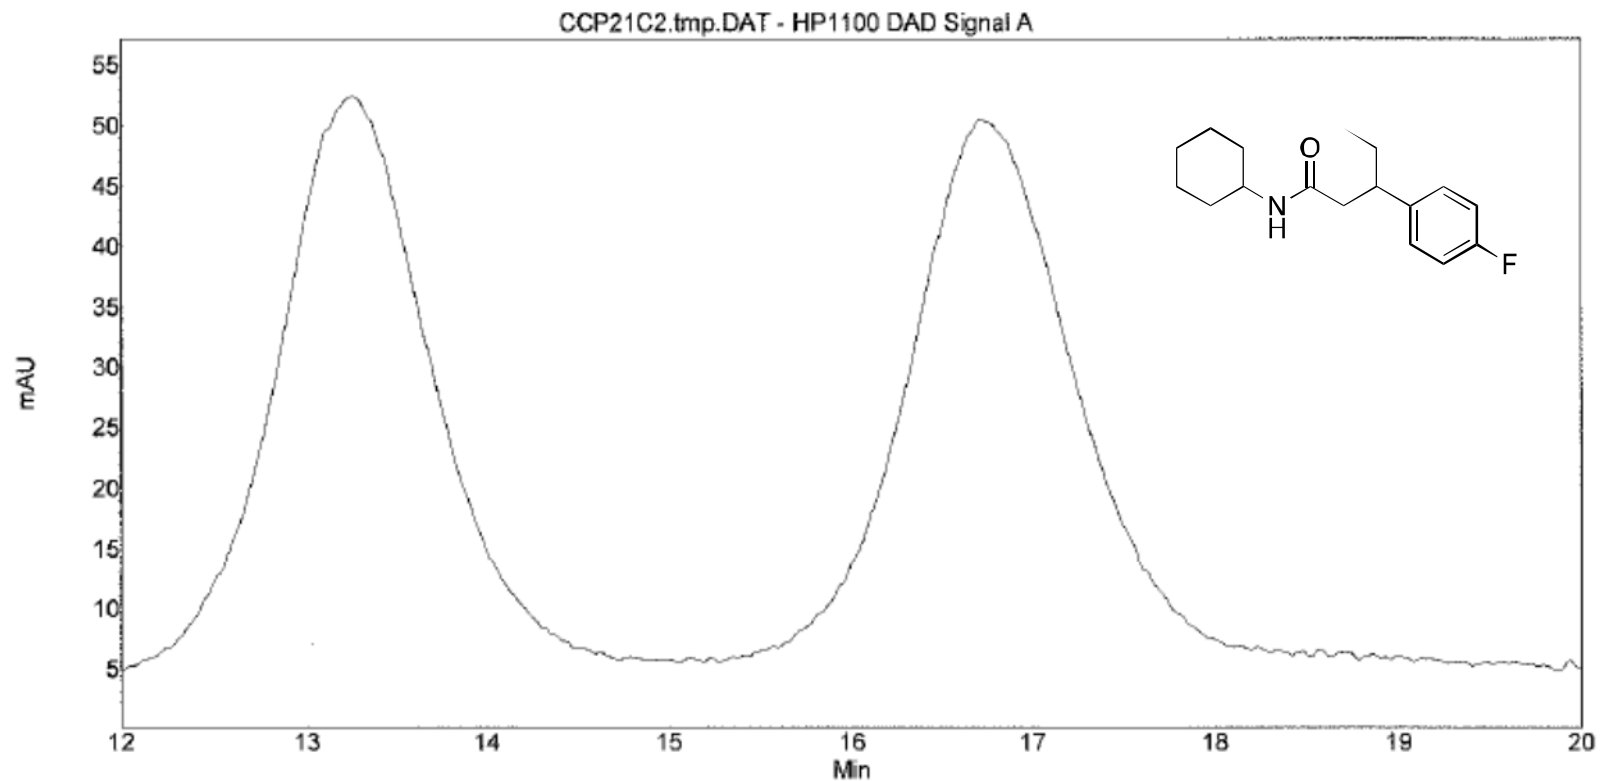

Peak results:

| Index | Name    | Time<br>[Min] | Area<br>[mAU*min] | As USP | Height<br>[mAU] | NTP USP | Selectivity | Signal to Noise Ratio | Width<br>[Min] |
|-------|---------|---------------|-------------------|--------|-----------------|---------|-------------|-----------------------|----------------|
| 1     | UNKNOWN | 13.25         | 50.5861           | 1.14   | 48.38           | 1052.23 | 0.00        | 77.2158               | 0.90           |
| 2     | UNKNOWN | 16.71         | 53.2645           | 1.13   | 46.02           | 1625.39 | 1.26        | 73.4552               | 0.98           |
| Total |         |               | 103.8506          |        |                 |         |             |                       |                |

Analysis of (*S*)-*N*-Cyclohexyl-3-(4-fluorophenyl)pentanamide (13e) using SFC (Column AS-H, 10% *i*-PrOH, 2 mL, 10\_MPa).

Chromatogram of enantioenriched cross-coupling product:

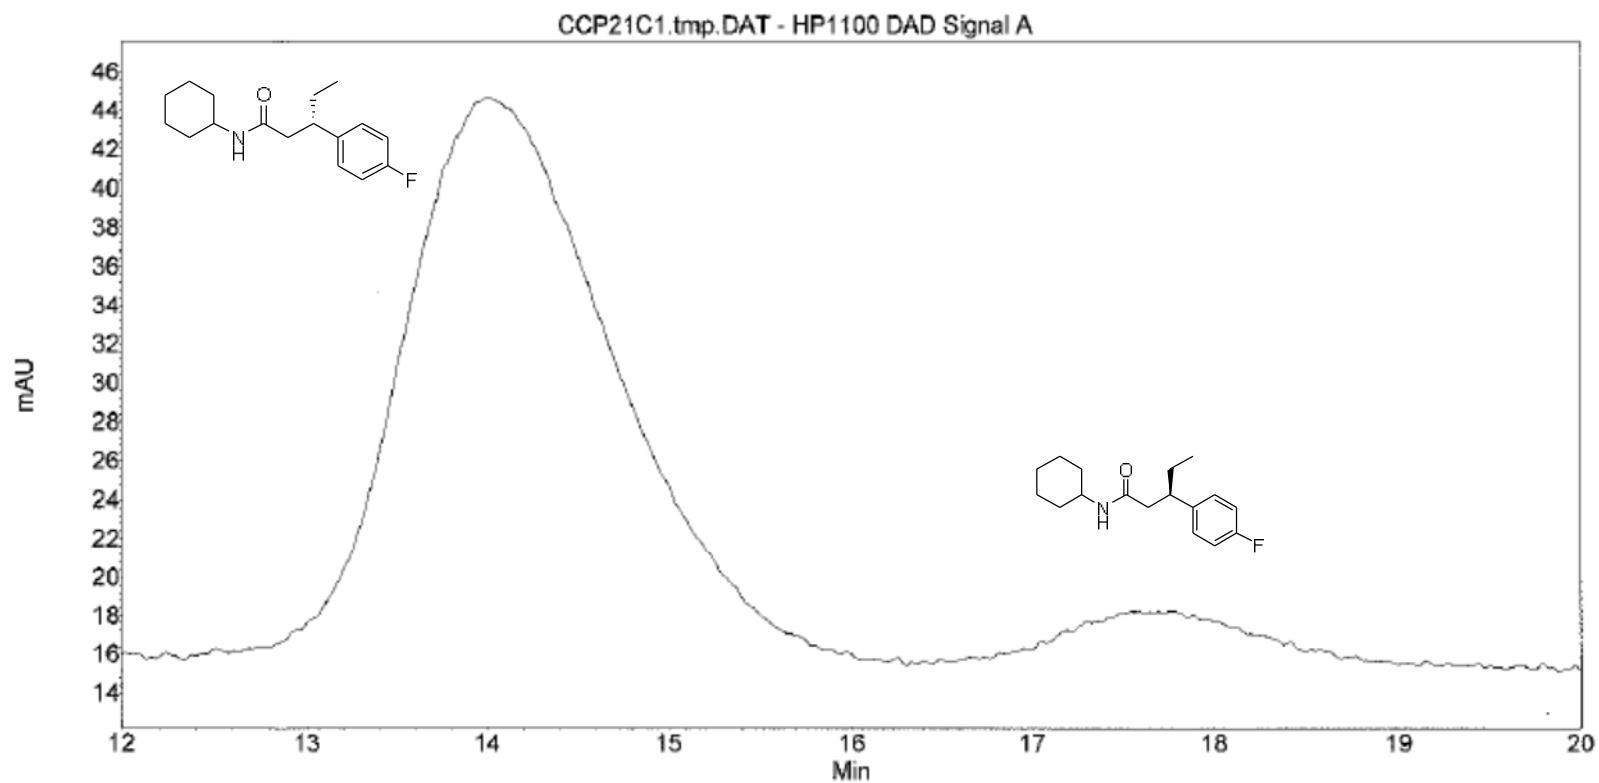

Peak results:

| Index | Name    | Time<br>[Min] | Area<br>[mAU*min] | As. USP<br>[mAU] | Height<br>[mAU] | NTP USP | Selectivity | Signal to Noise Ratio | Width<br>[Min] |
|-------|---------|---------------|-------------------|------------------|-----------------|---------|-------------|-----------------------|----------------|
| 1     | UNKNOWN | 14.02         | 39.5788           | 1.24             | 29.04           | 817.30  | 0.00        | 56.6380               | 1.26           |
| 2     | UNKNOWN | 17.55         | 1.5490            | 1.17             | 1.81            | 2864.41 | 1.25        | 3.5294                | 0.90           |
| Total |         |               | 41.1278           |                  |                 |         |             |                       |                |

$^1\text{H}$  NMR (Acetone, 360 MHz) spectrum of potassium (*R*)-*N*-(4-methoxyphenyl)-3-(trifluoroborato)butanamide (2a)

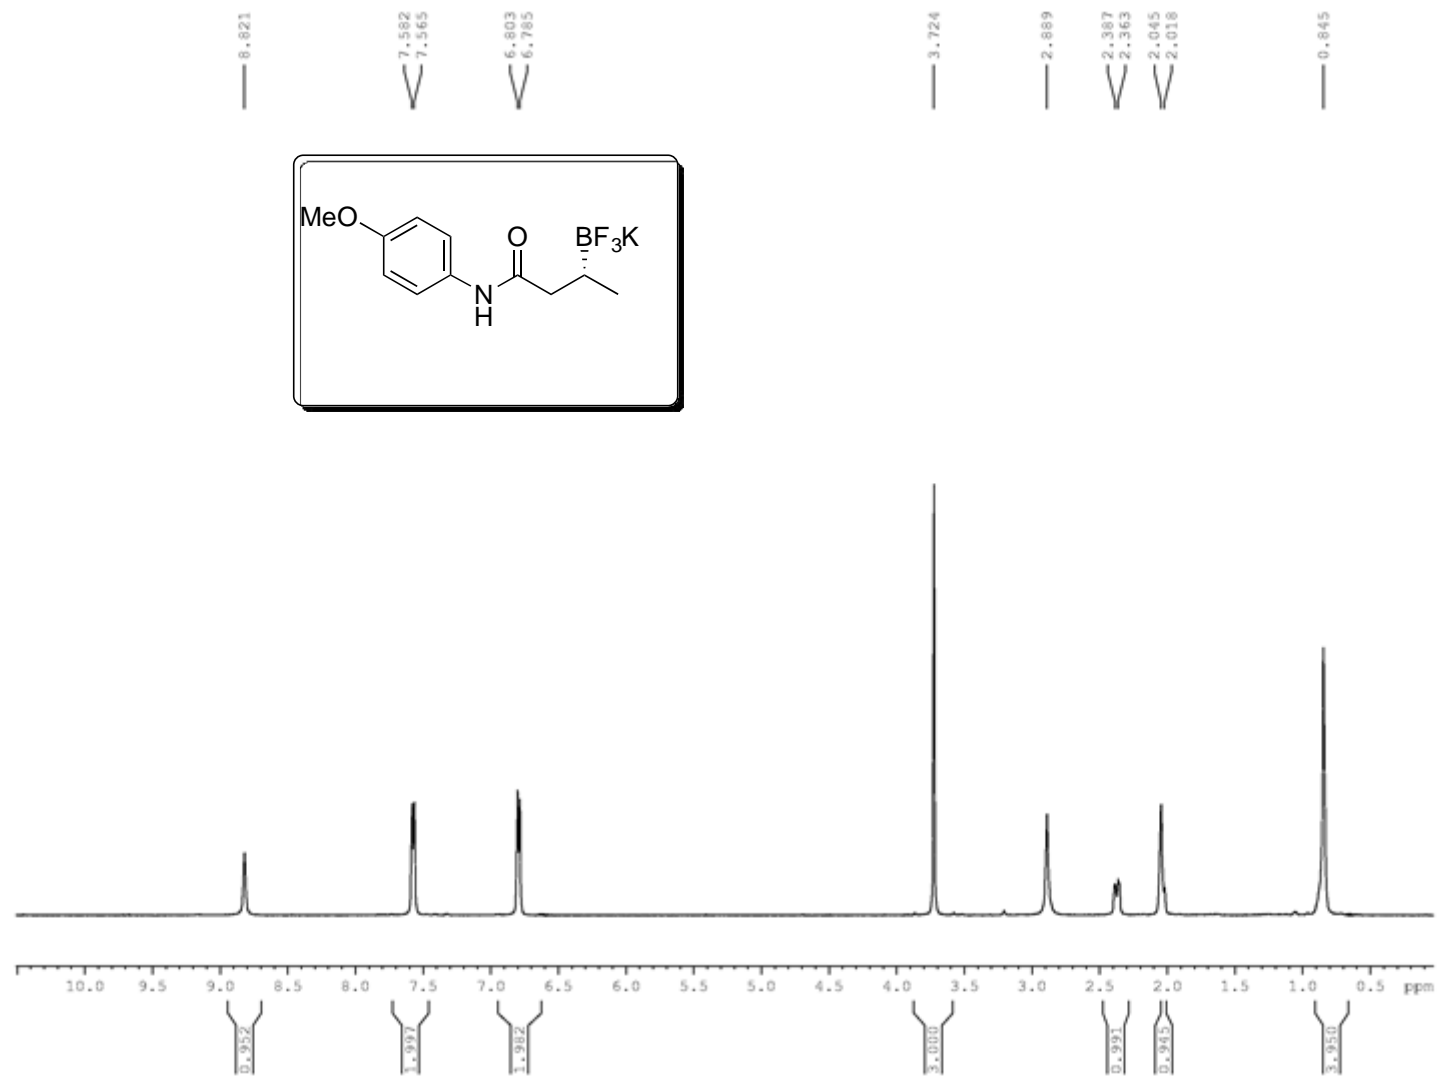

<sup>13</sup>C NMR (Acetone, 125.8 MHz) spectrum of potassium (*R*)-*N*-(4-methoxyphenyl)-3-(trifluoroborato)butanamide (2a)

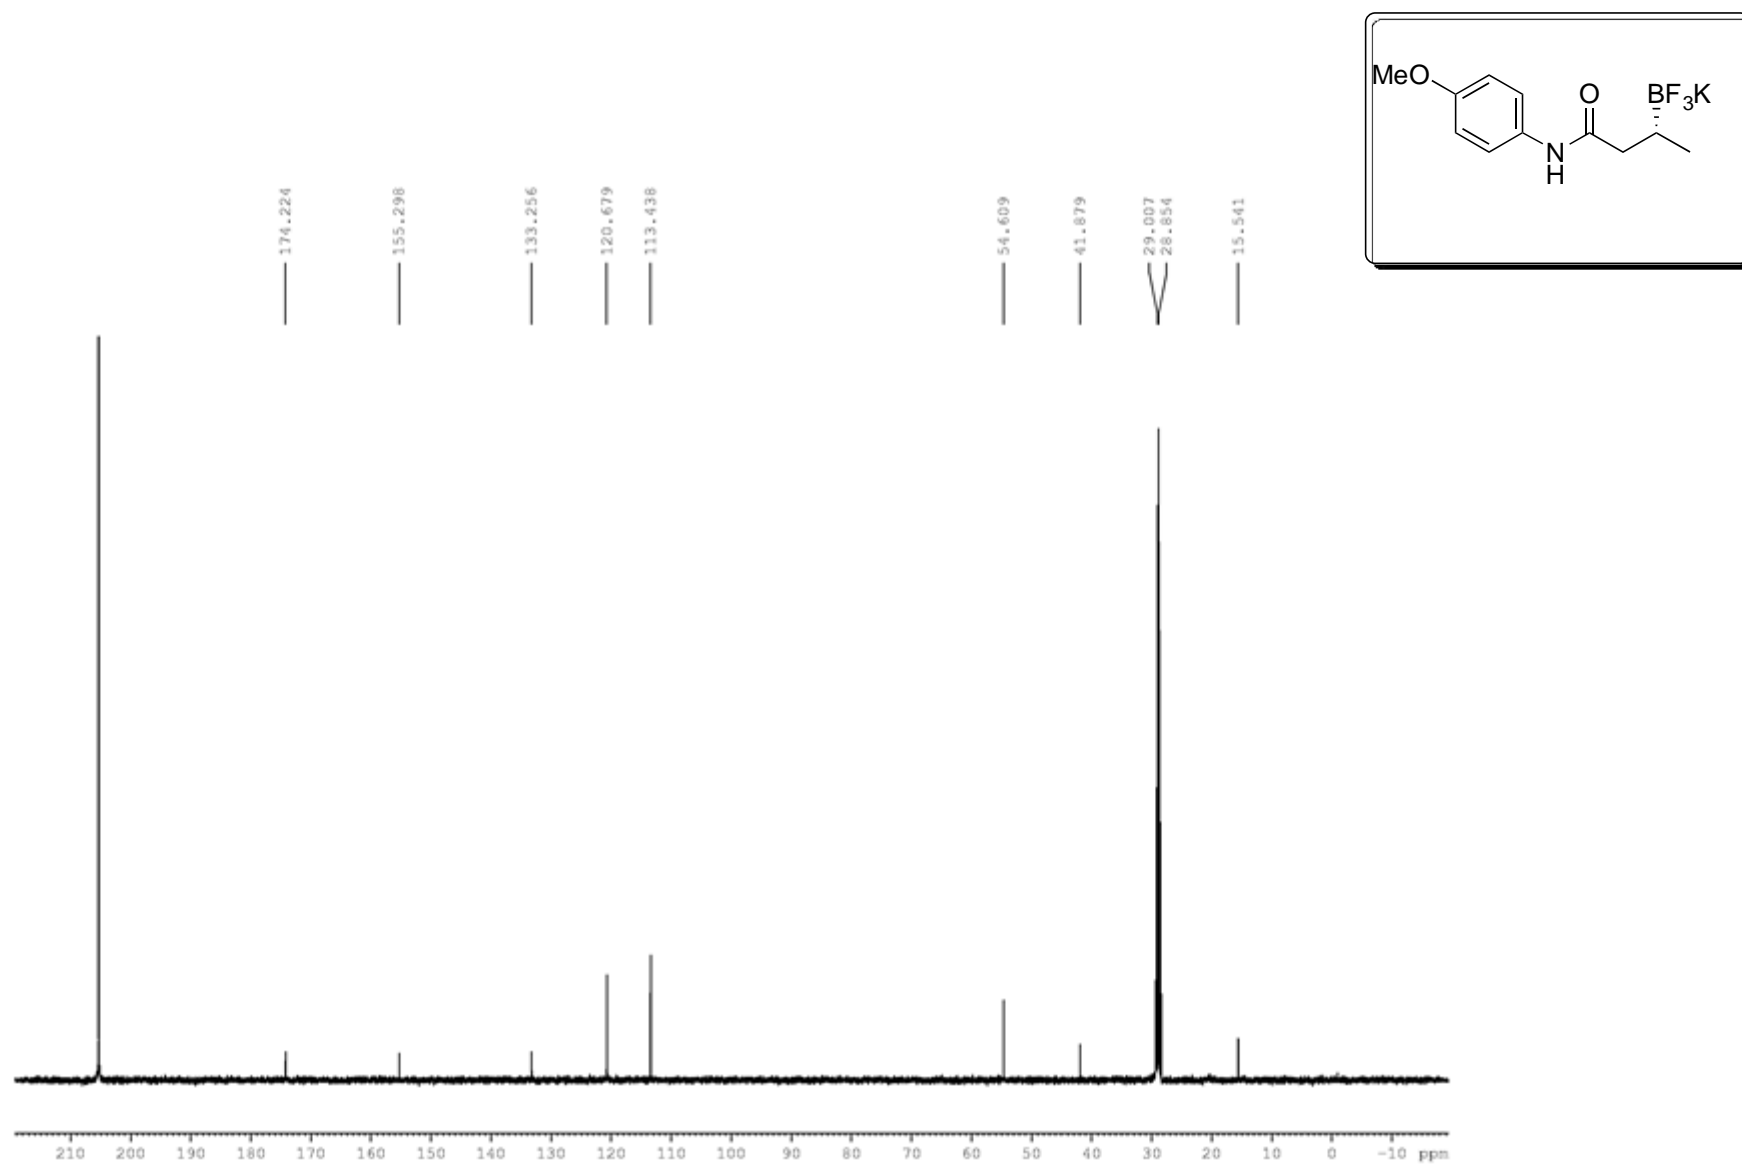



<sup>19</sup>F NMR (Acetone, 338.8 MHz) spectrum of potassium (*R*)-*N*-(4-methoxyphenyl)-3-(trifluoroborato)butanamide (2a)

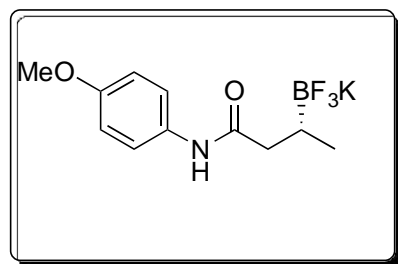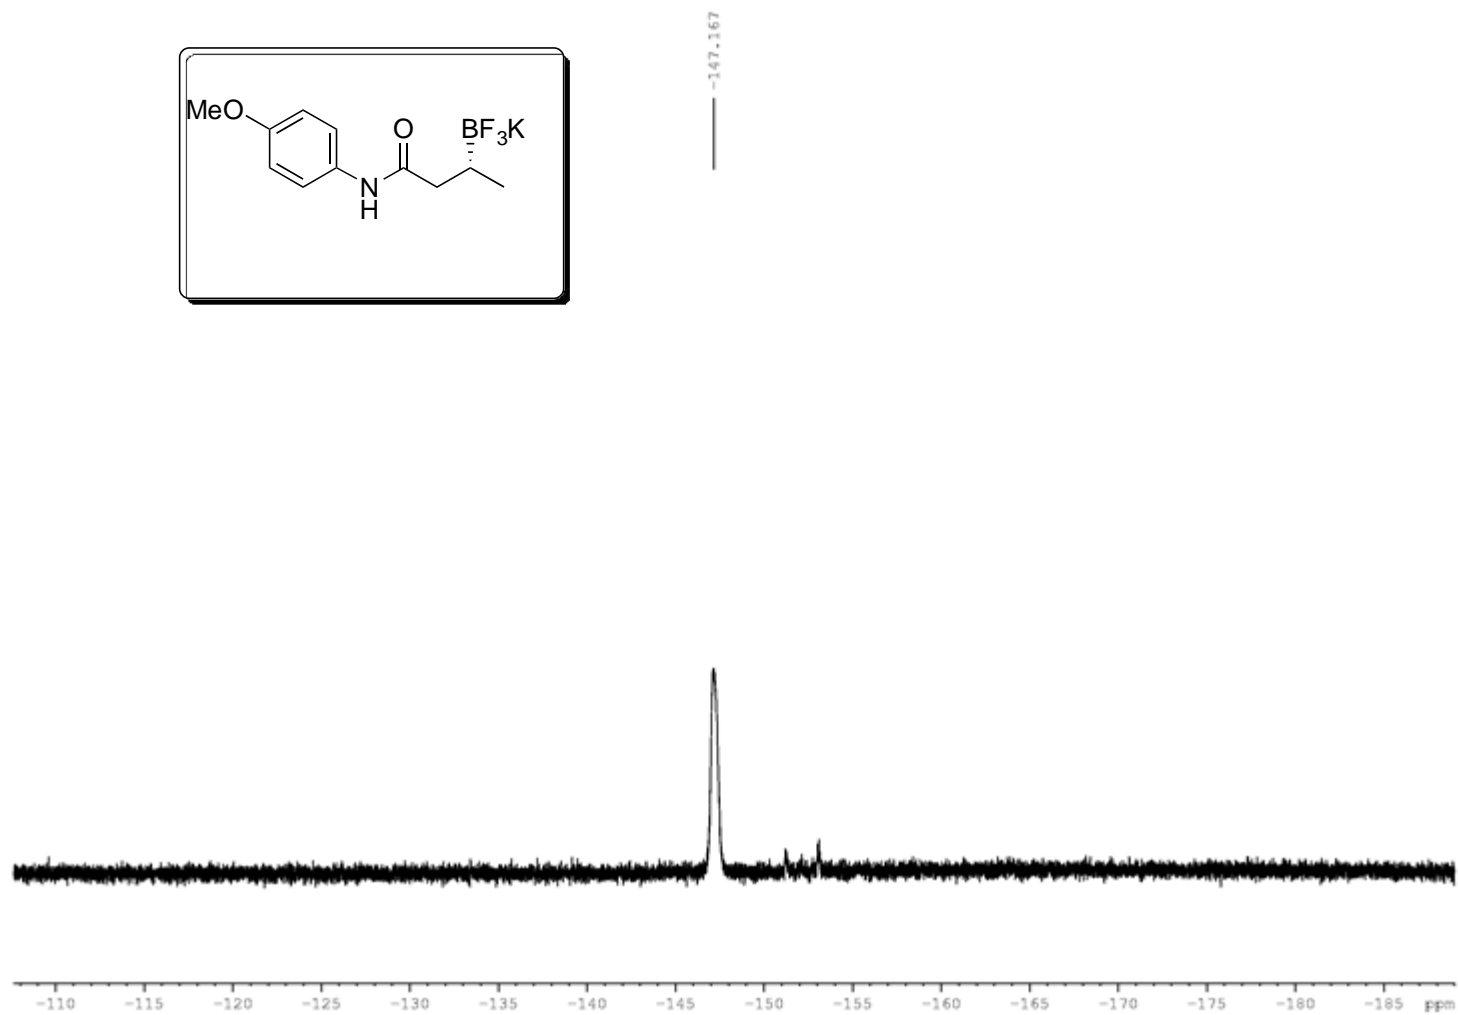

**$^{11}\text{B}$  NMR (Acetone, 128.4 MHz) spectrum of potassium (*R*)-*N*-(4-methoxyphenyl)-3-(trifluoroborato)butanamide (2a)**

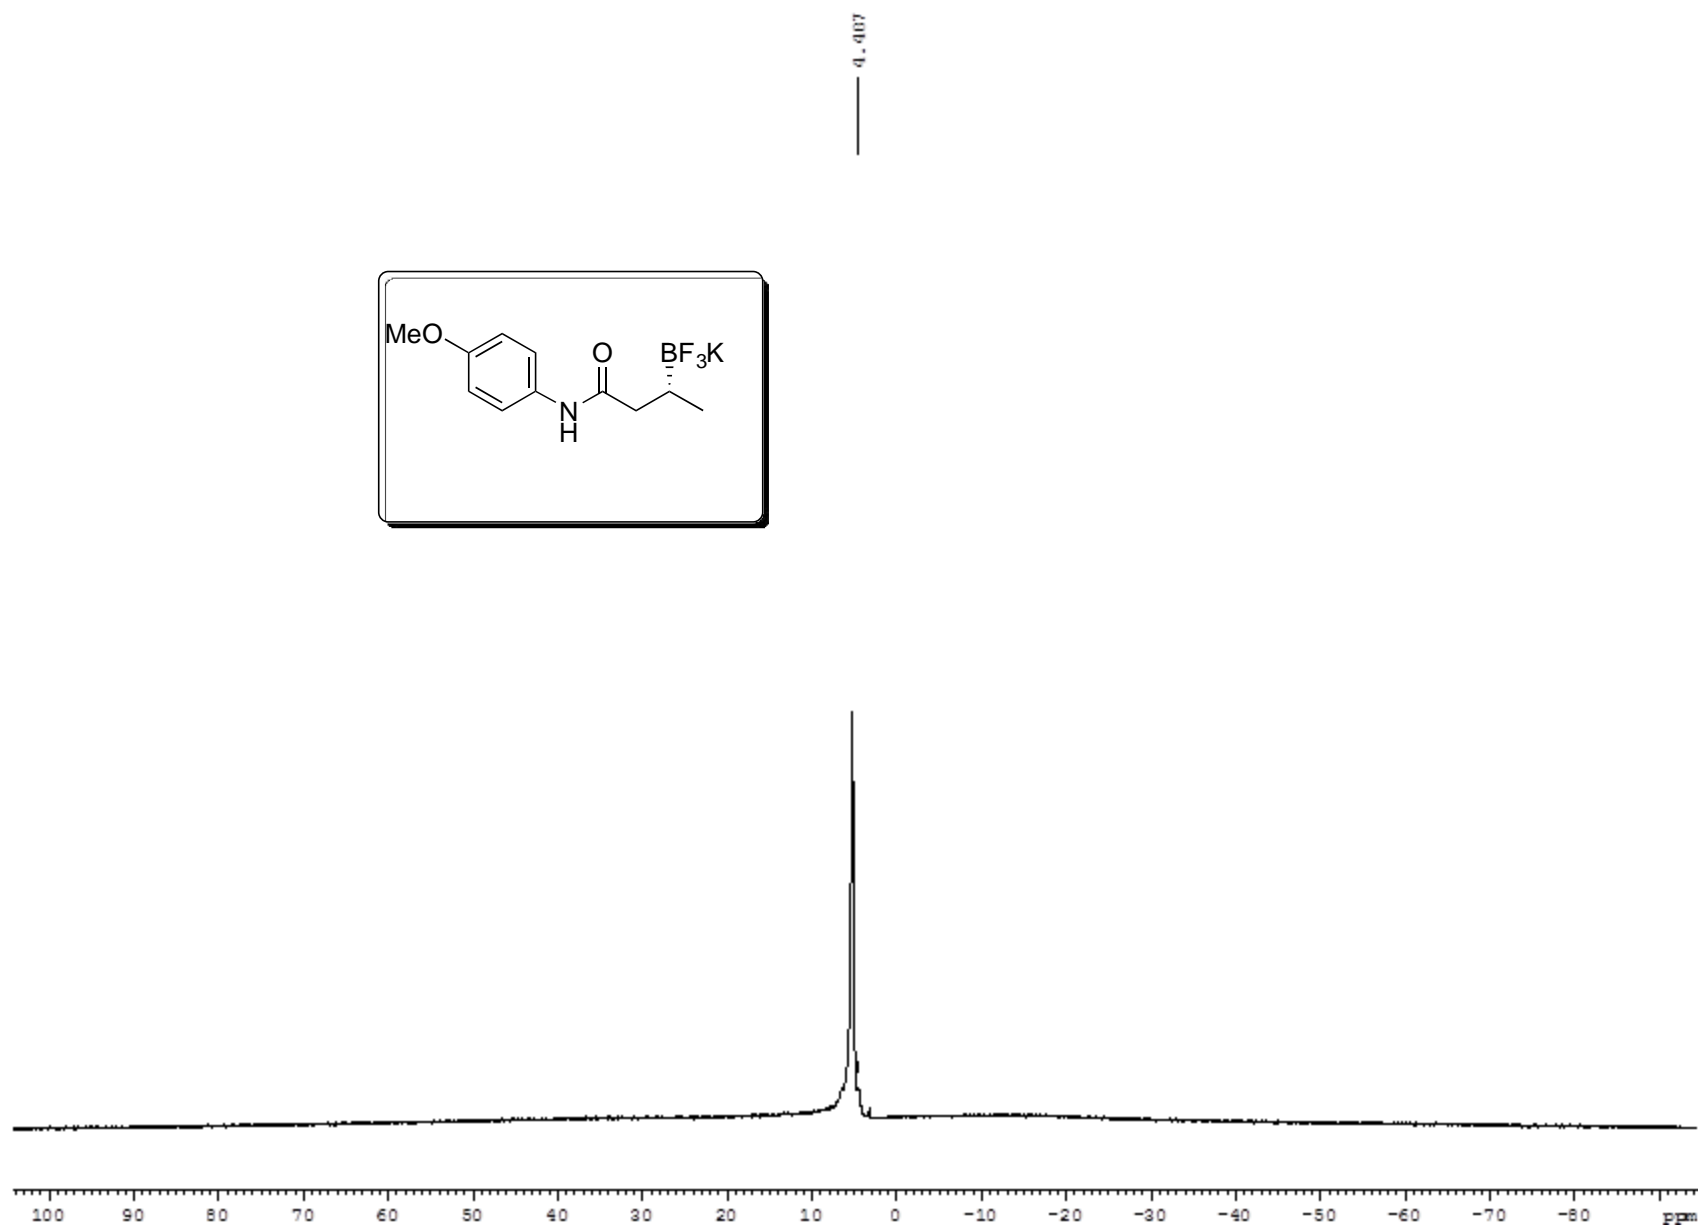

<sup>1</sup>H NMR (DMSO, 360 MHz) spectrum of Potassium (*R*)-*N*-(4-methoxyphenyl)-3-(trifluoroborato)methyloctanamide (2b)

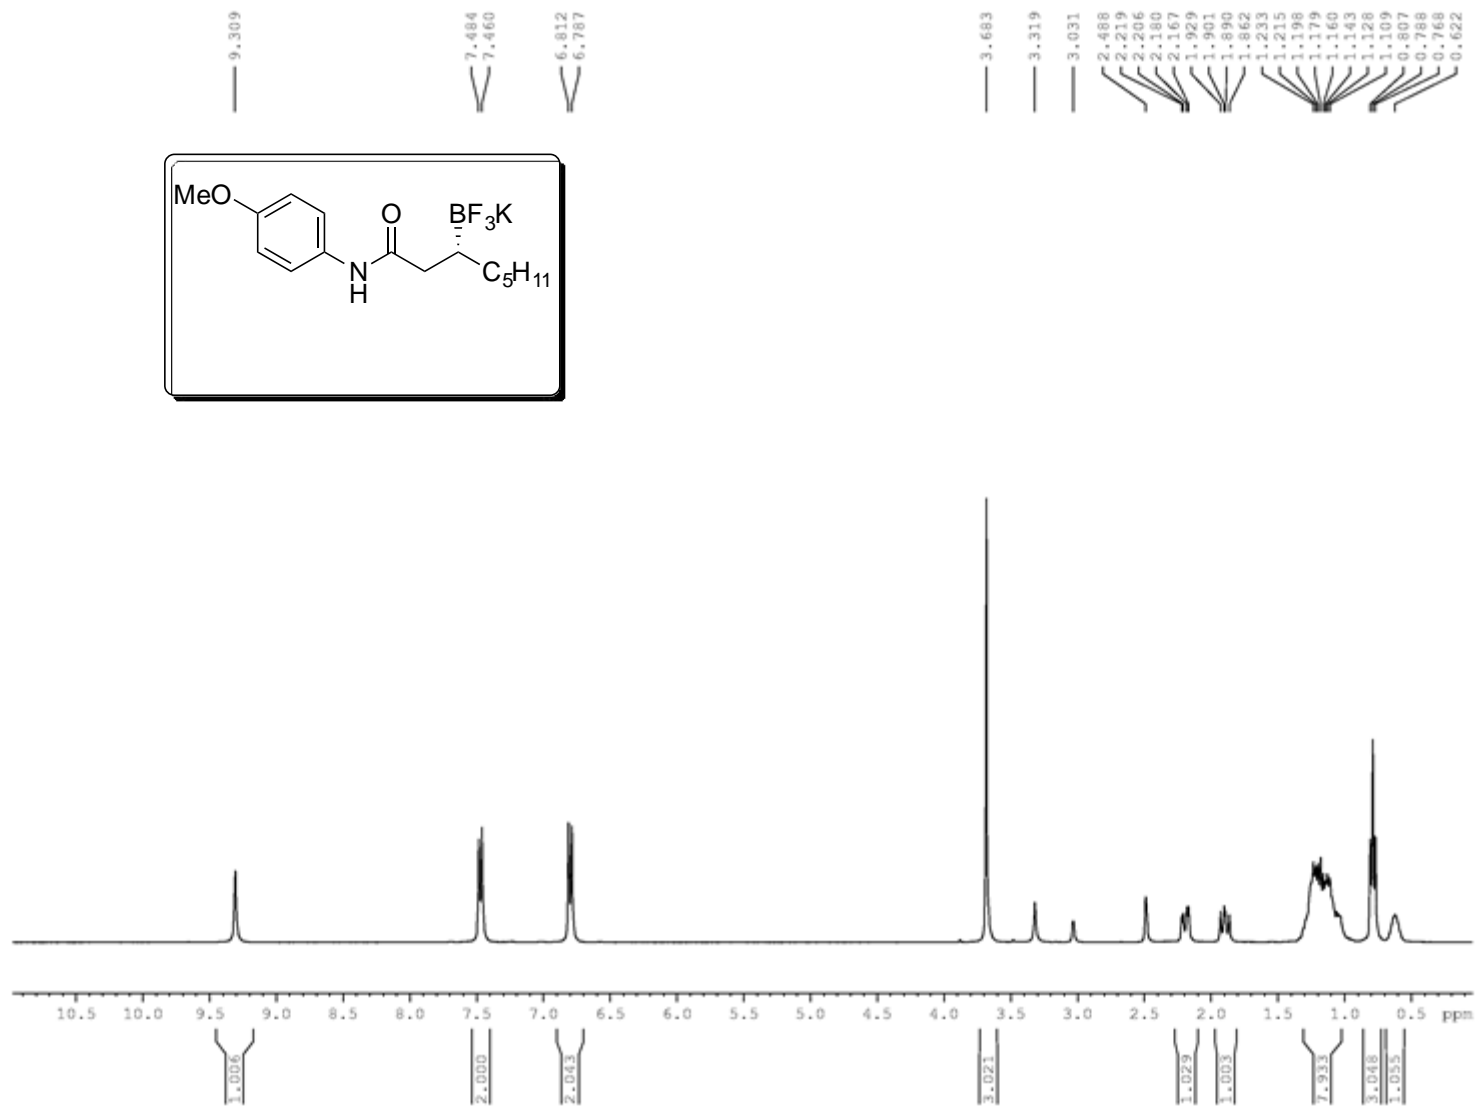

<sup>13</sup>C NMR (DMSO, 90.5 MHz) spectrum of Potassium (*R*)-*N*-(4-methoxyphenyl)-3-(trifluoroborato)methyloctanamide (2b)

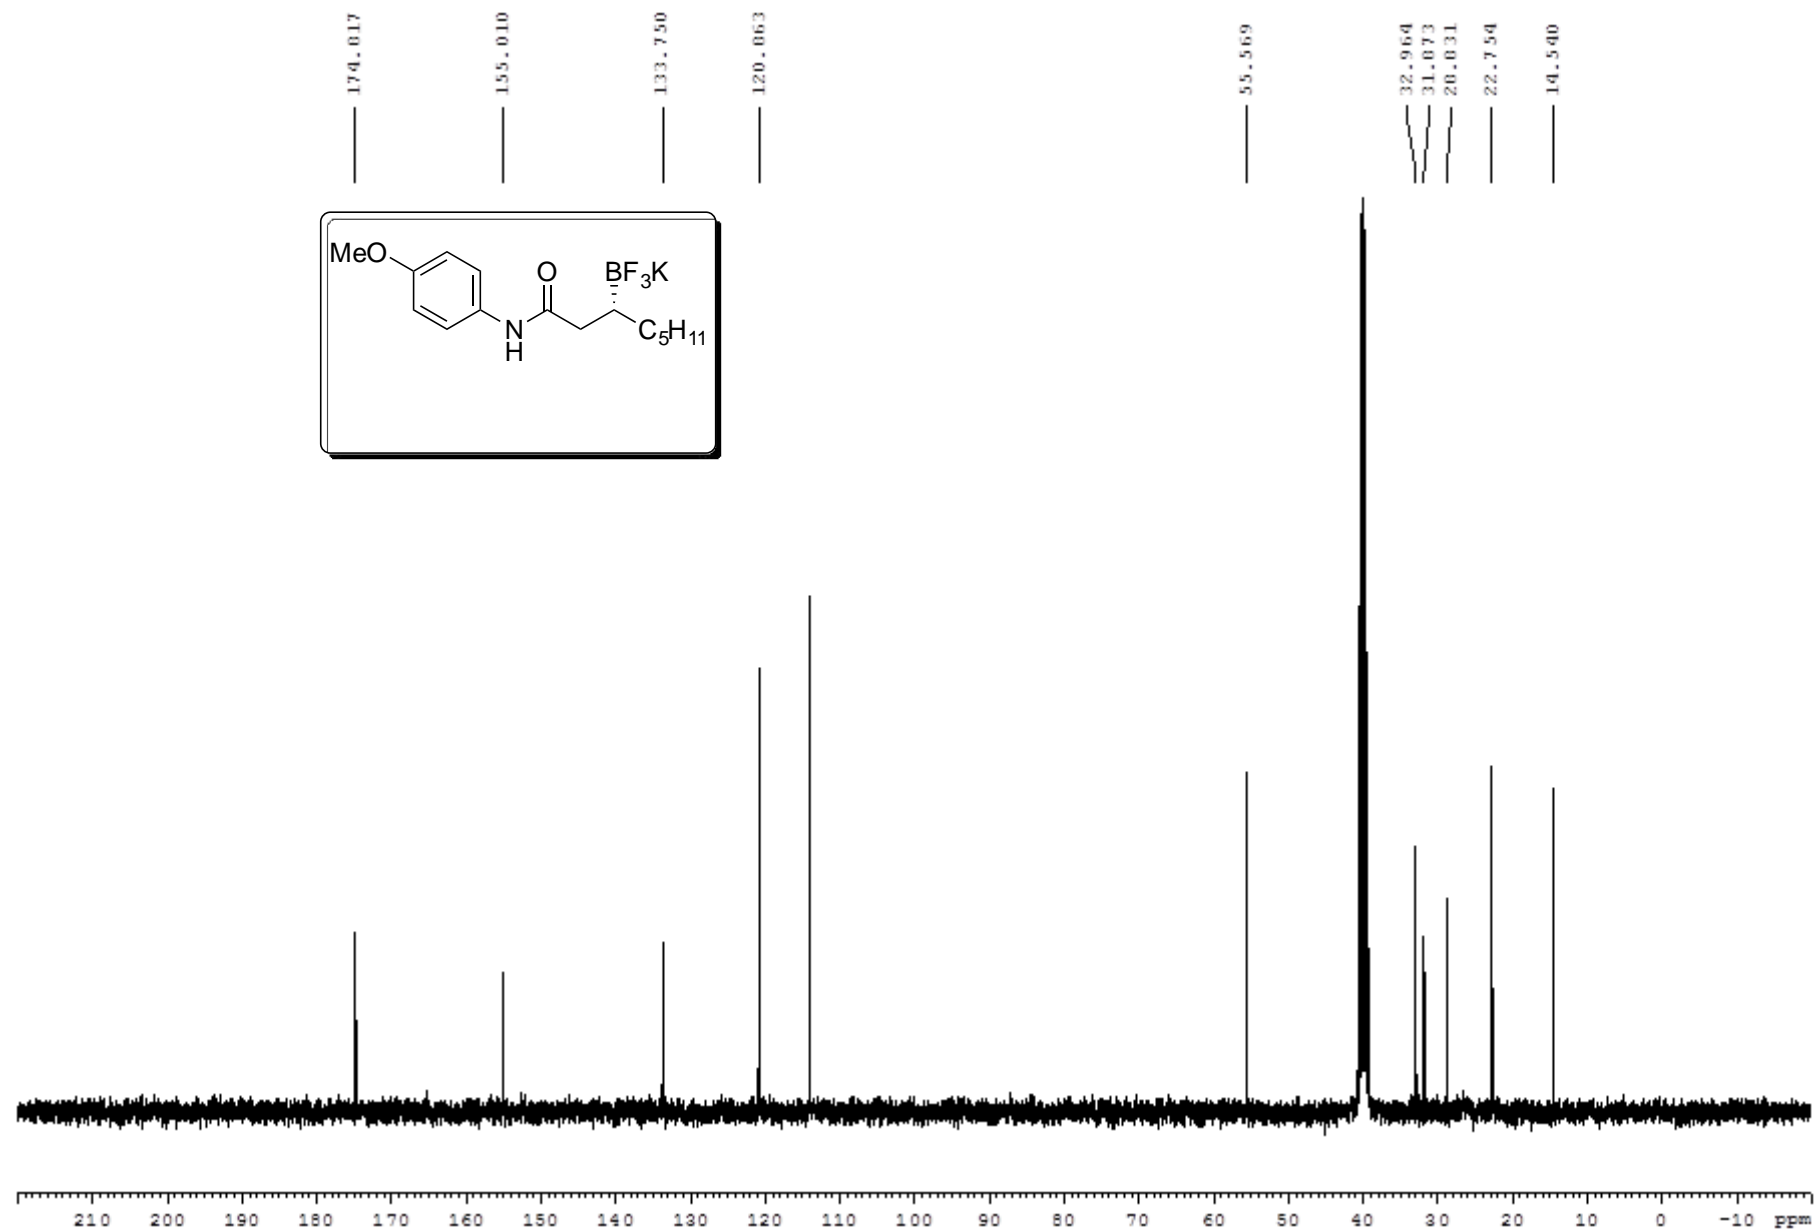

<sup>19</sup>F NMR (DMSO, 338.8 MHz) spectrum of Potassium (*R*)-*N*-(4-methoxyphenyl)-3-(trifluoroborato)methyloctanamide (2b)

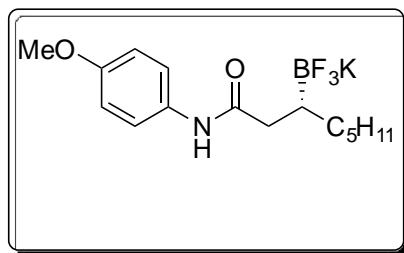

-141.732

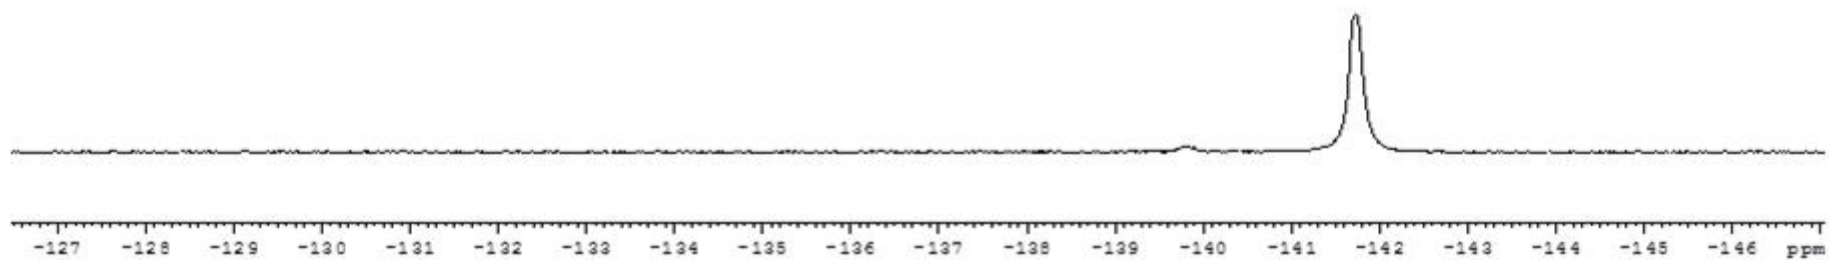

<sup>11</sup>B NMR (DMSO, 128.4 MHz) spectrum of Potassium (*R*)-*N*-(4-methoxyphenyl)-3-(trifluoroborato)methyloctanamide (2b)

5.099  
4.995

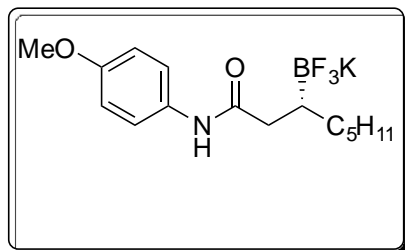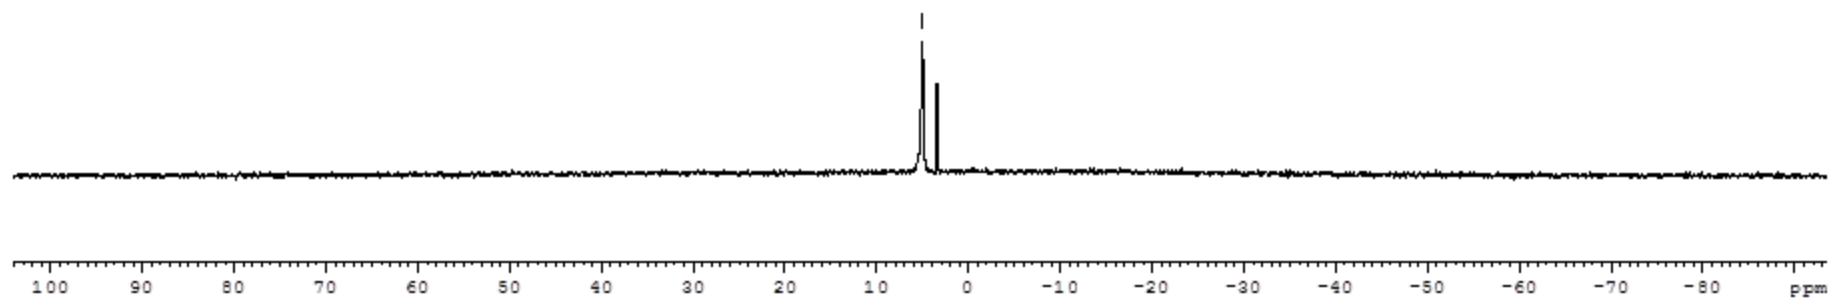

<sup>1</sup>H NMR (Acetone, 300 MHz) spectrum of potassium (*R*)-*N*-phenyl-3-(trifluoroborato)butanamide (2c)

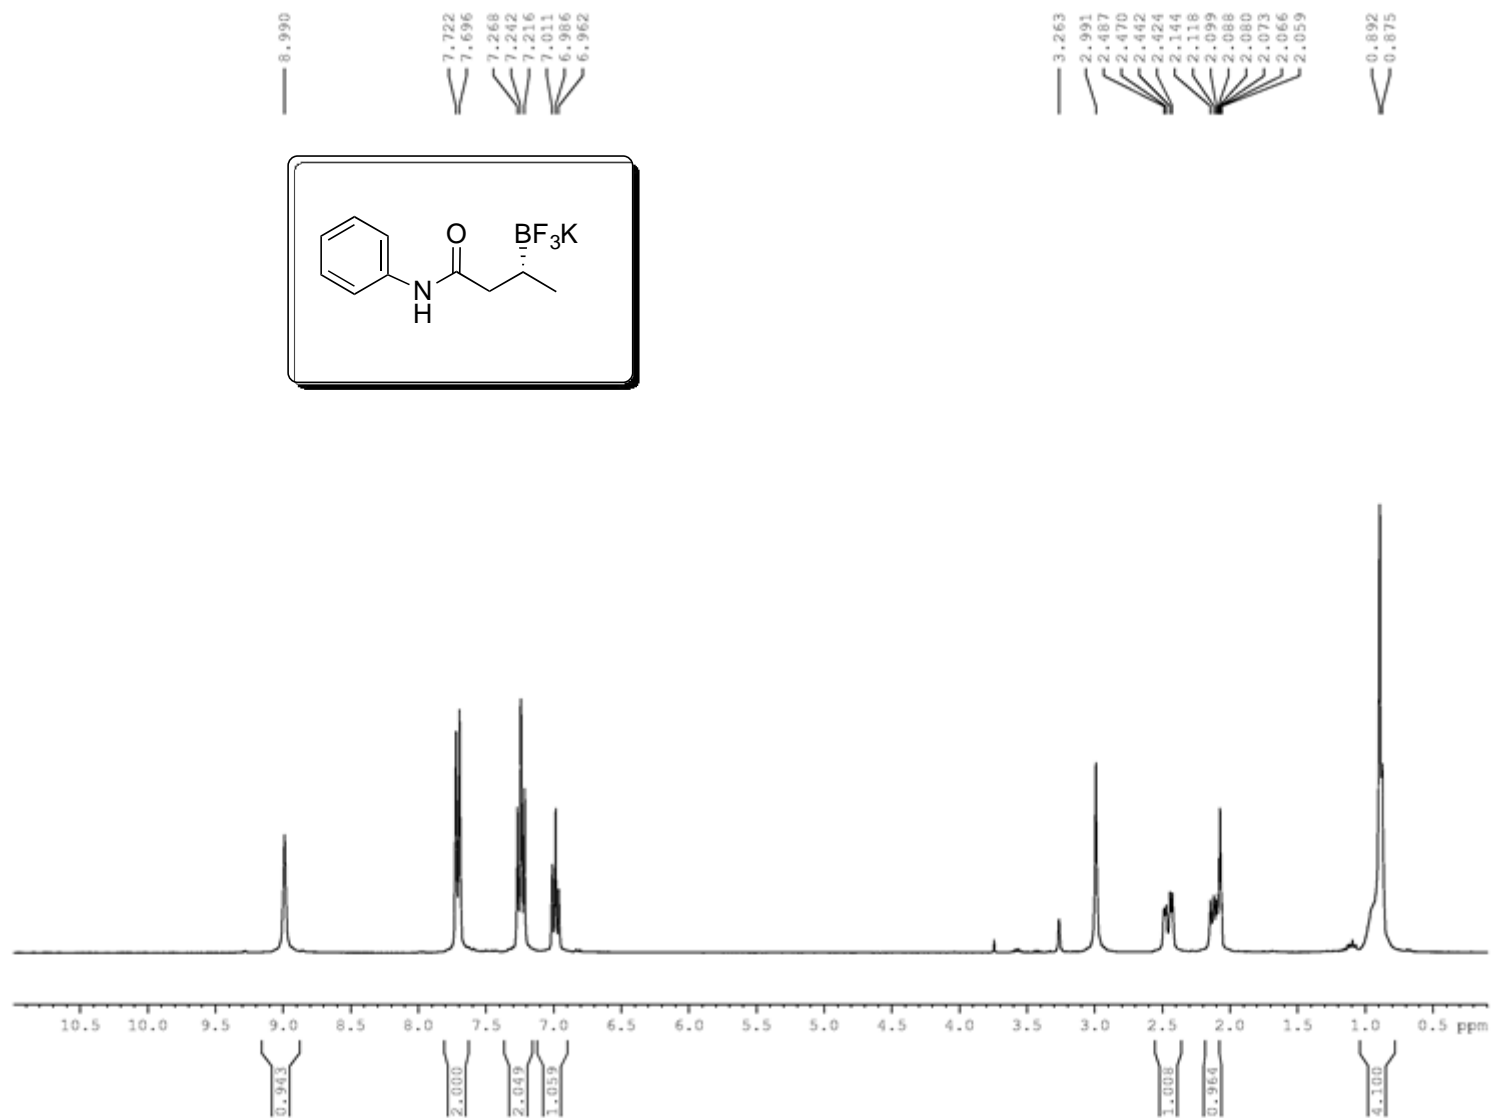

<sup>13</sup>C NMR (Acetone, 75.4 MHz) spectrum of potassium (*R*)-*N*-phenyl-3-(trifluoroborato)butanamide (2c)

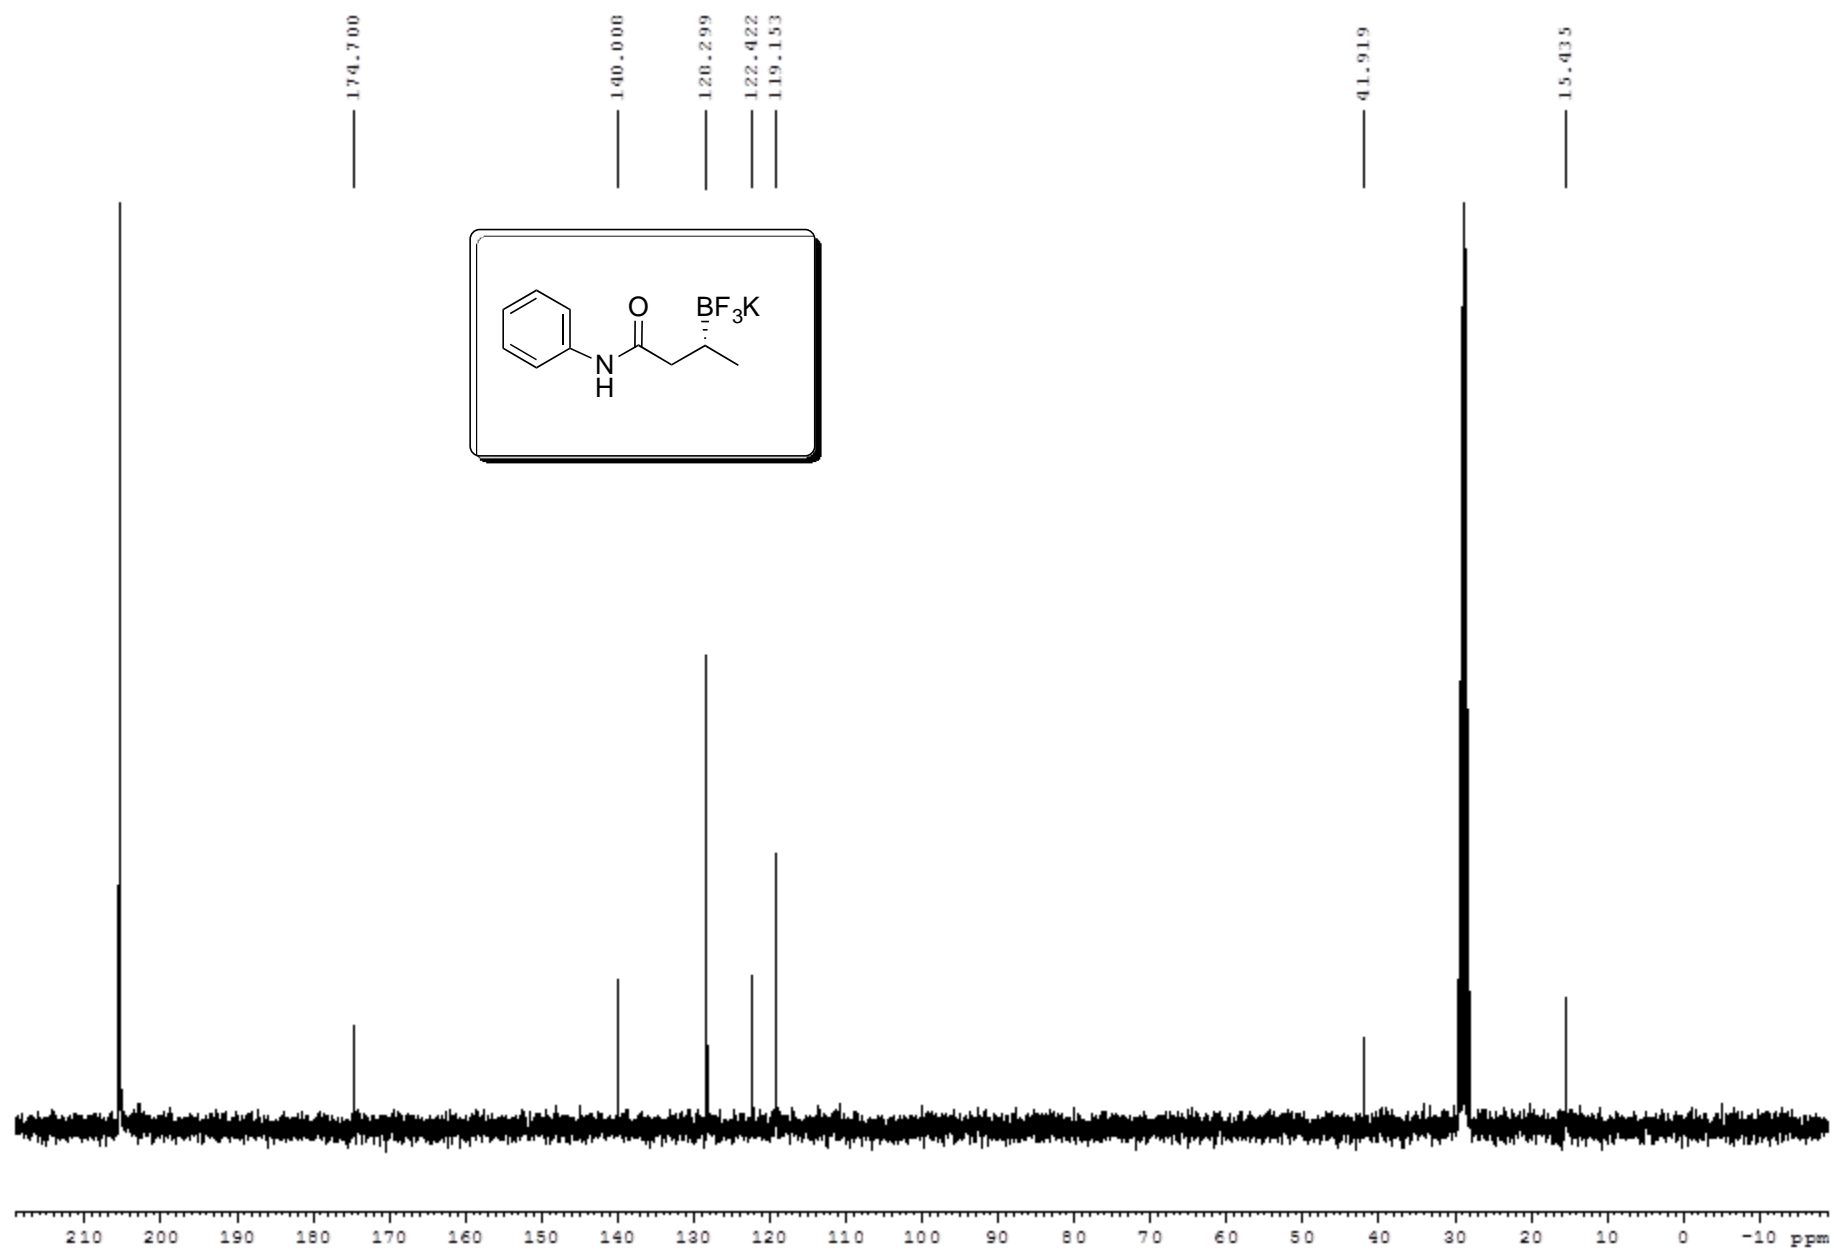



<sup>19</sup>F NMR (Acetone, 282.4 MHz) spectrum of potassium (*R*)-*N*-phenyl-3-(trifluoroborato)butanamide (2c)

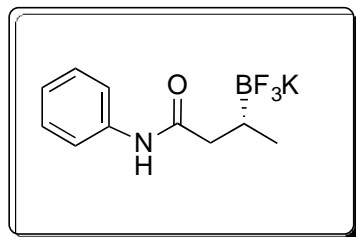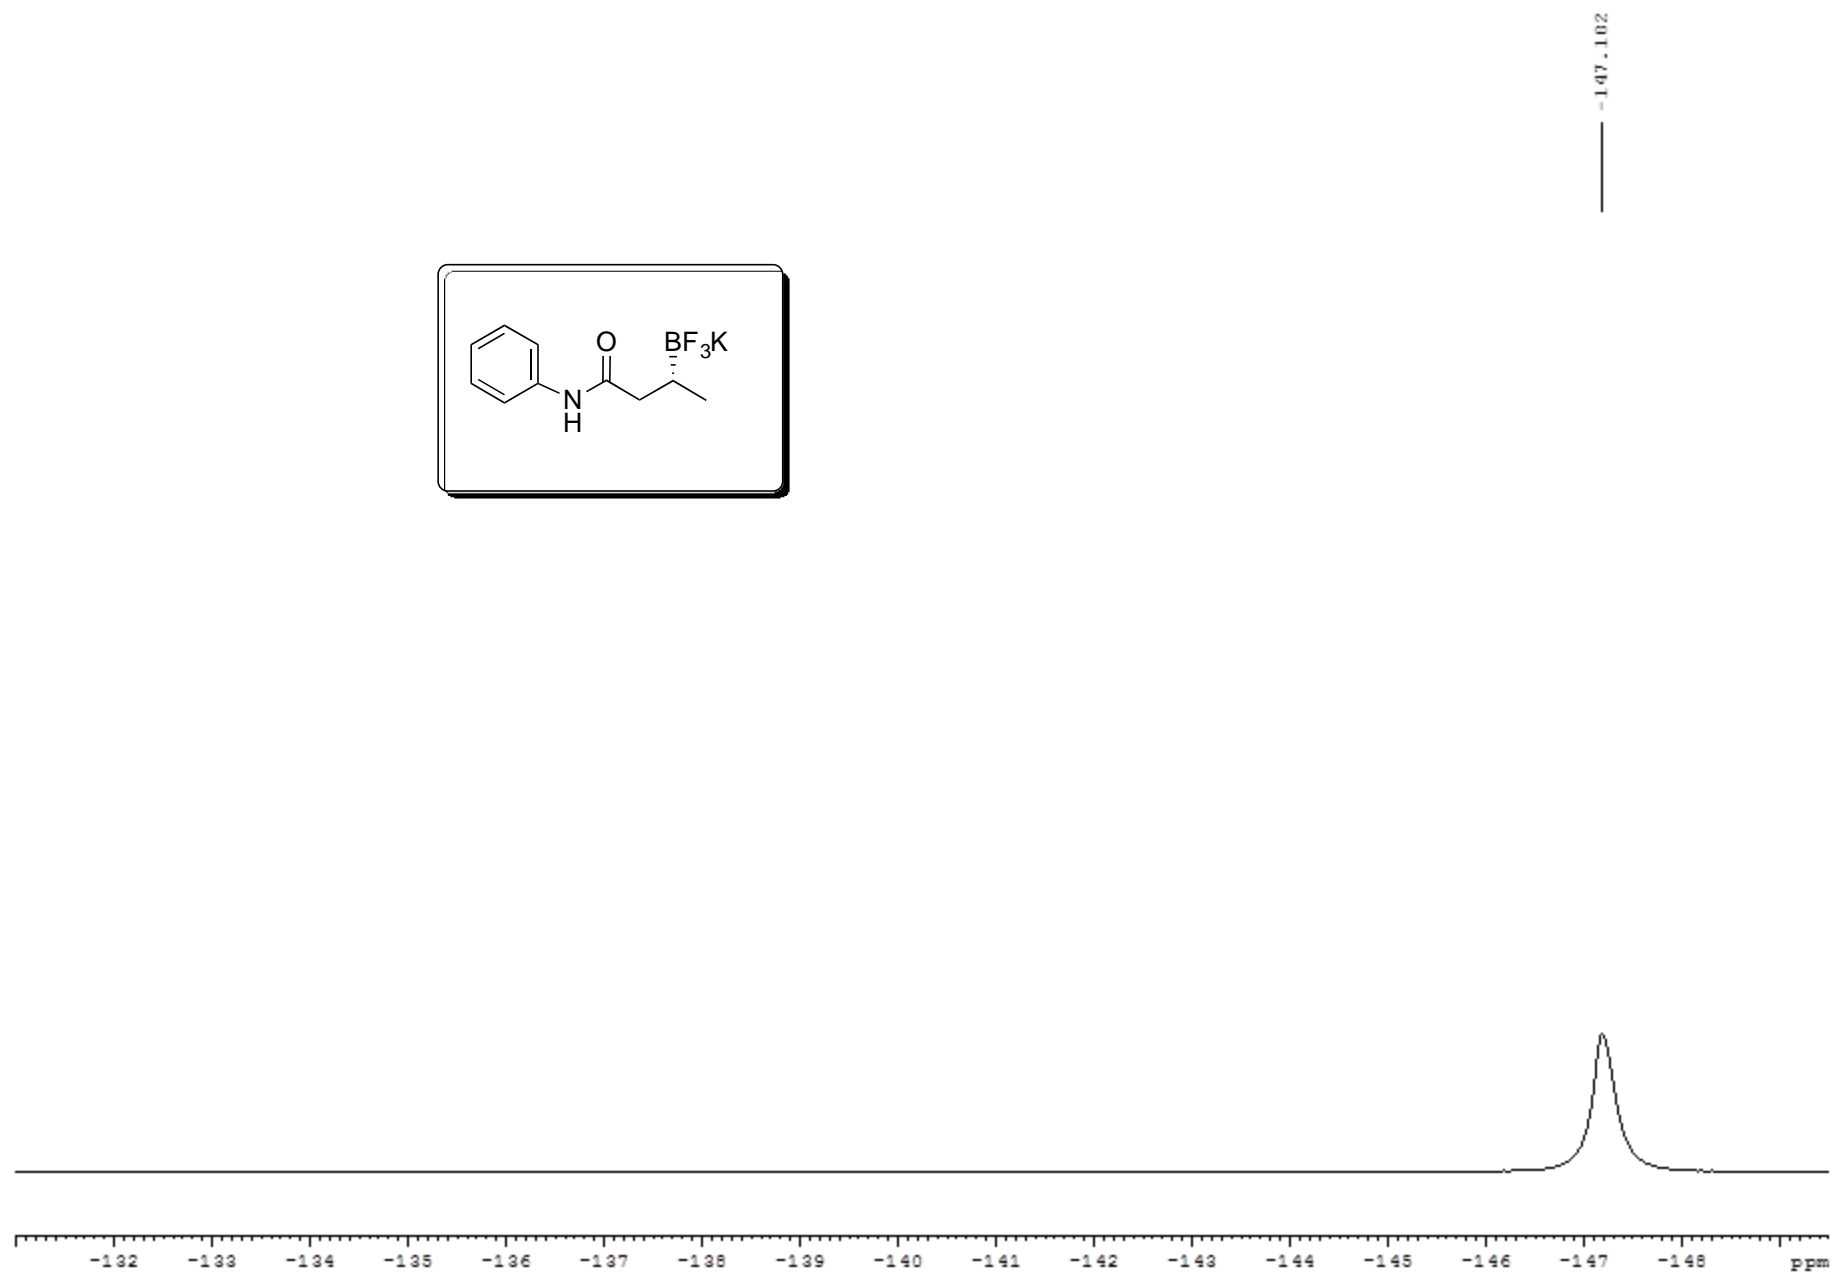

<sup>11</sup>B NMR (Acetone, 128.4 MHz) spectrum of potassium (*R*)-*N*-phenyl-3-(trifluoroborato)butanamide (2c)

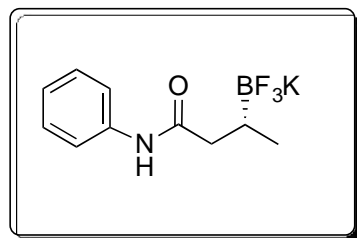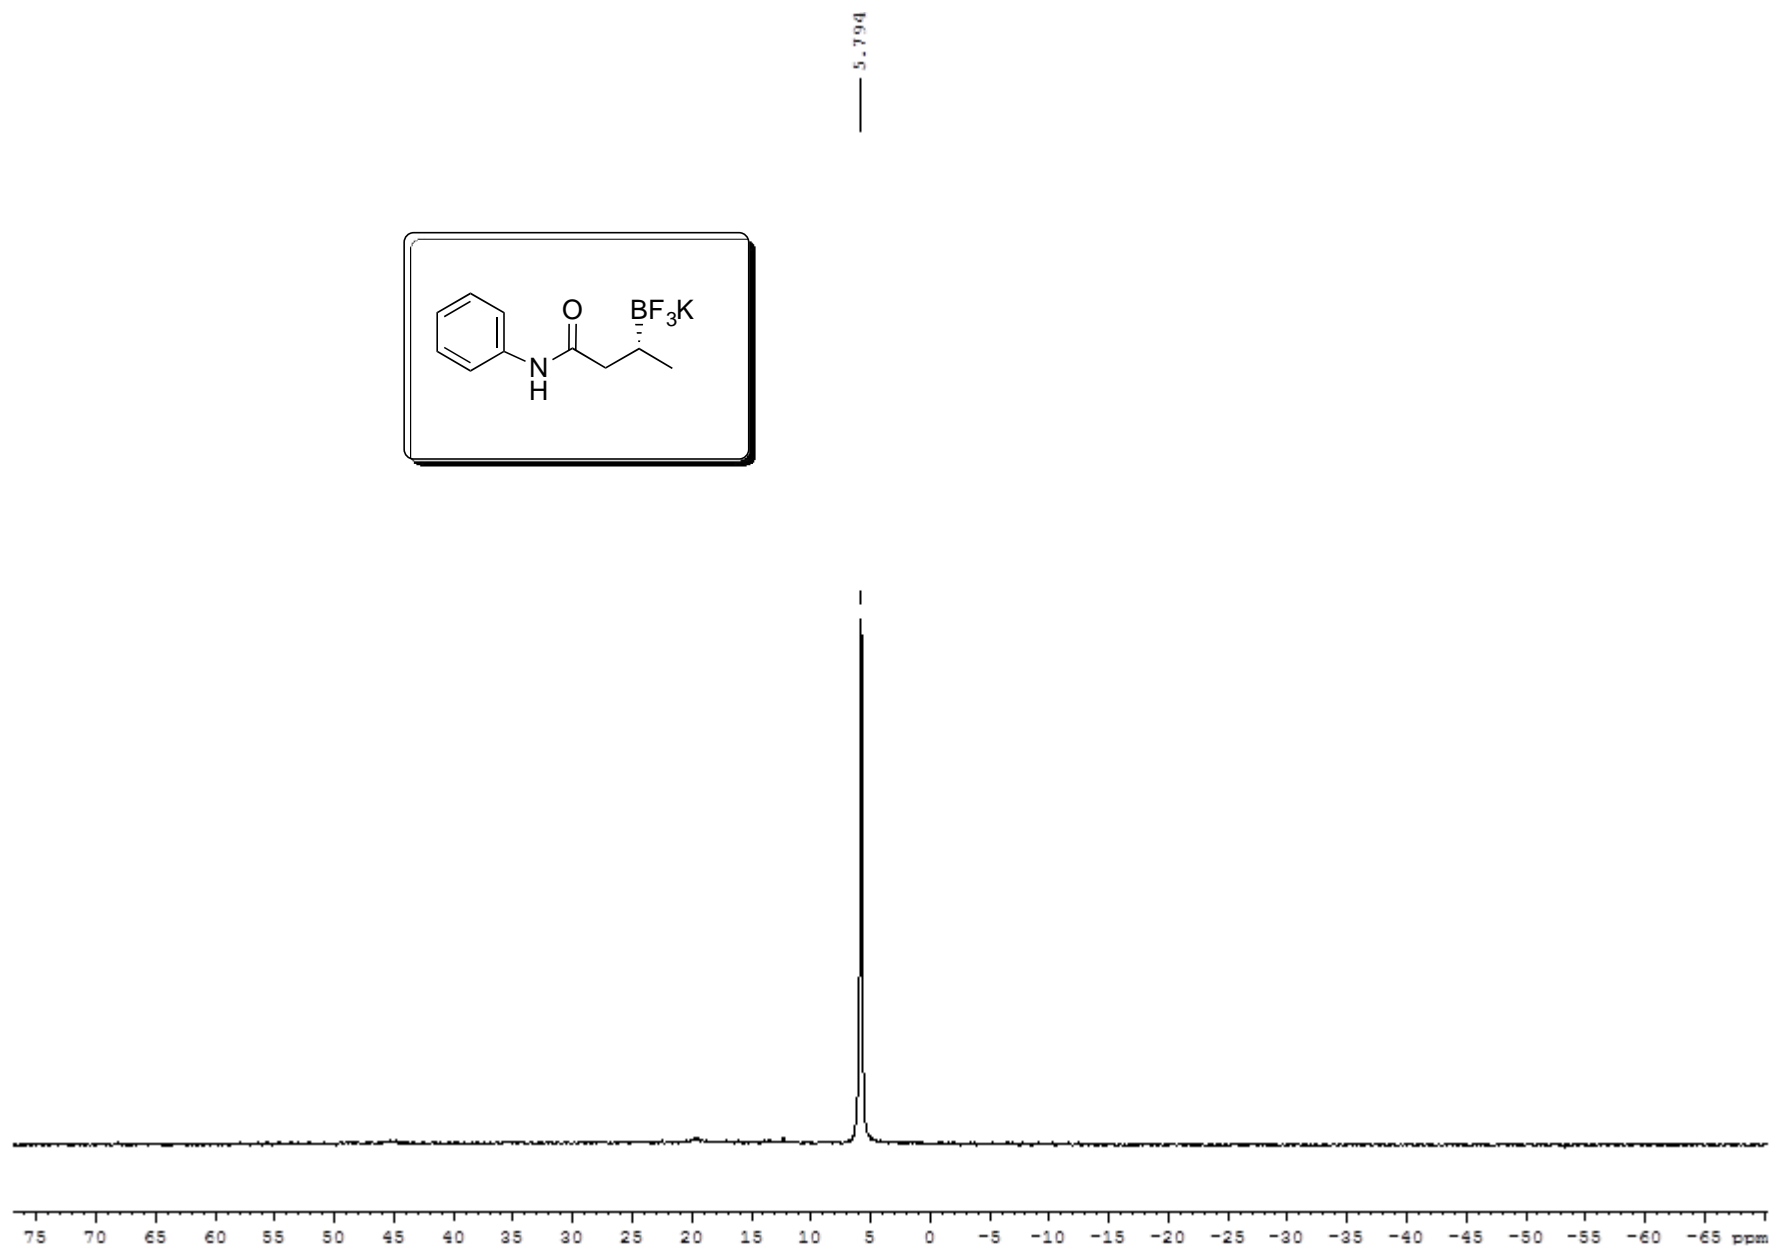

<sup>1</sup>H NMR (DMSO, 300 MHz) spectrum of potassium (*R*)-*N*-cyclohexyl-3-(trifluoroborato)butanamide (2d)

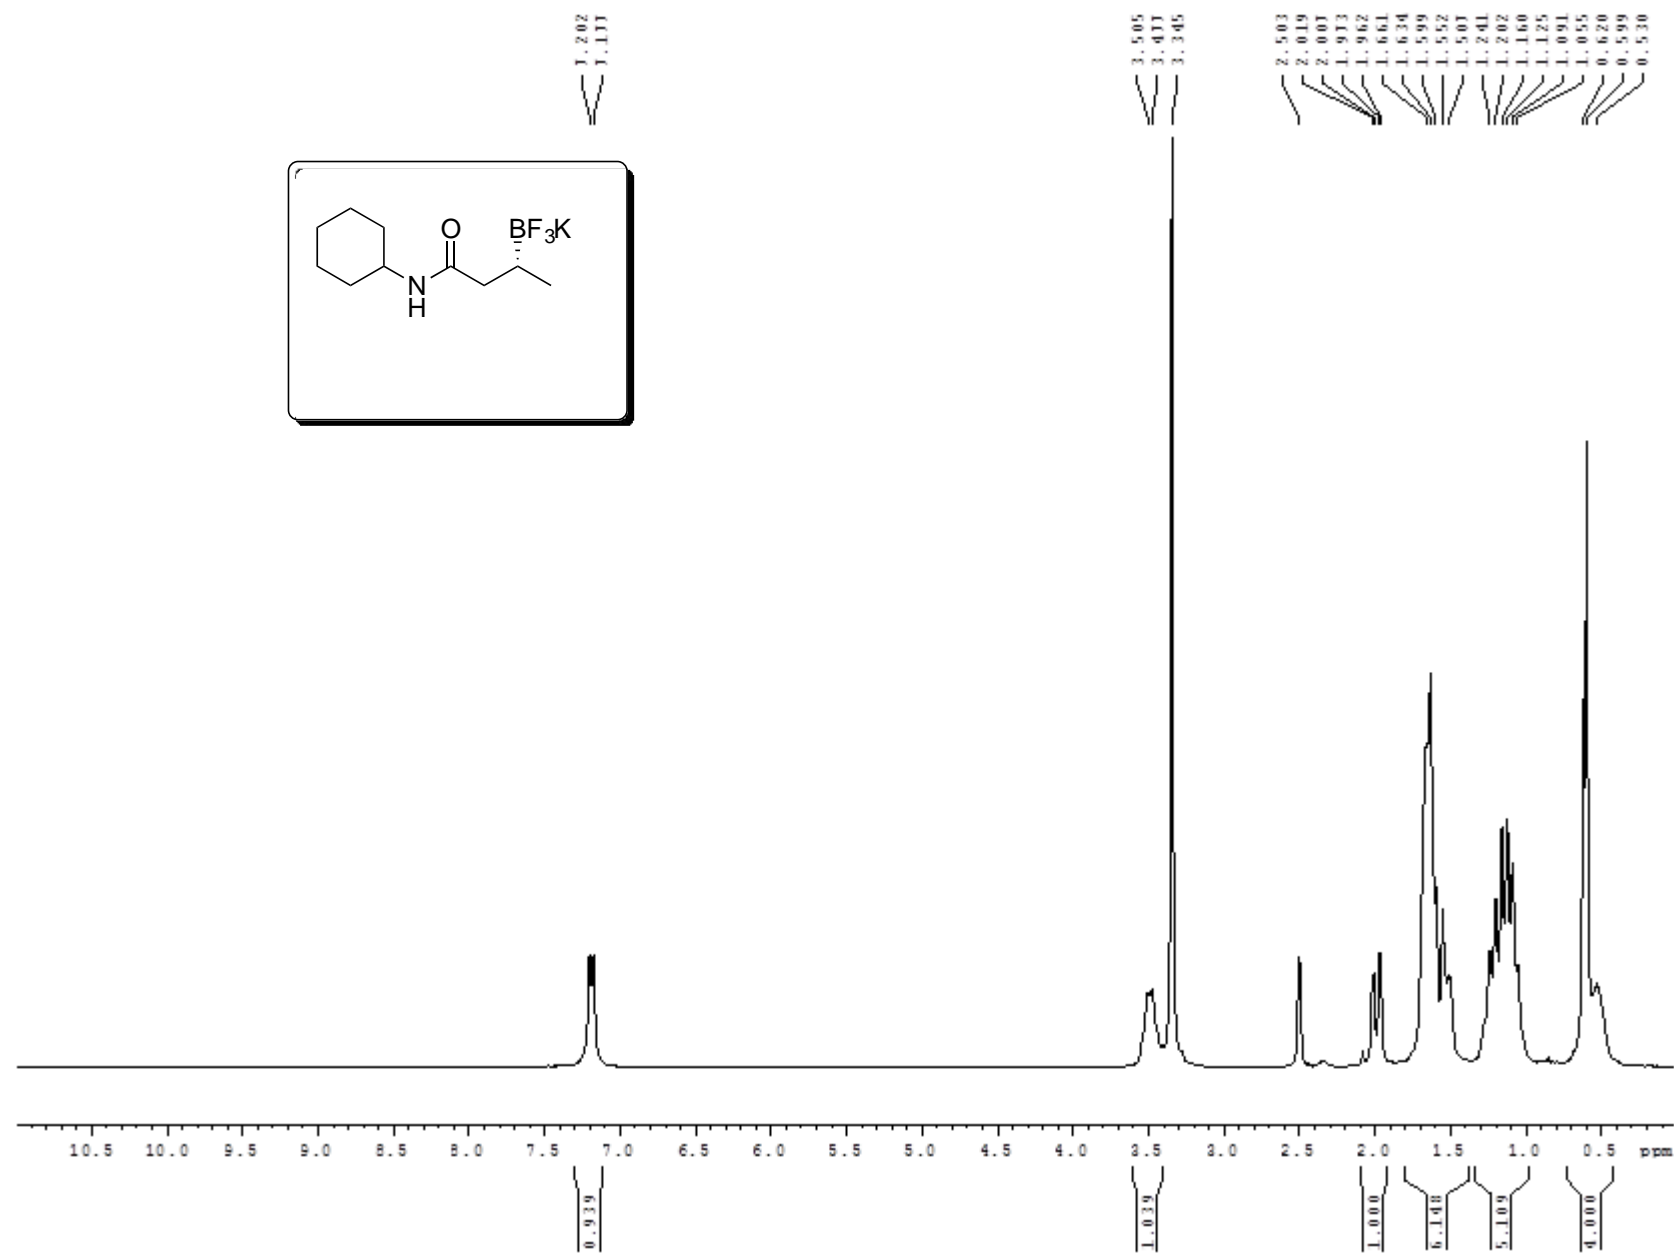

<sup>13</sup>C NMR (DMSO, 75.4 MHz) spectrum of potassium (*R*)-*N*-cyclohexyl-3-(trifluoroborato)butanamide (2d)

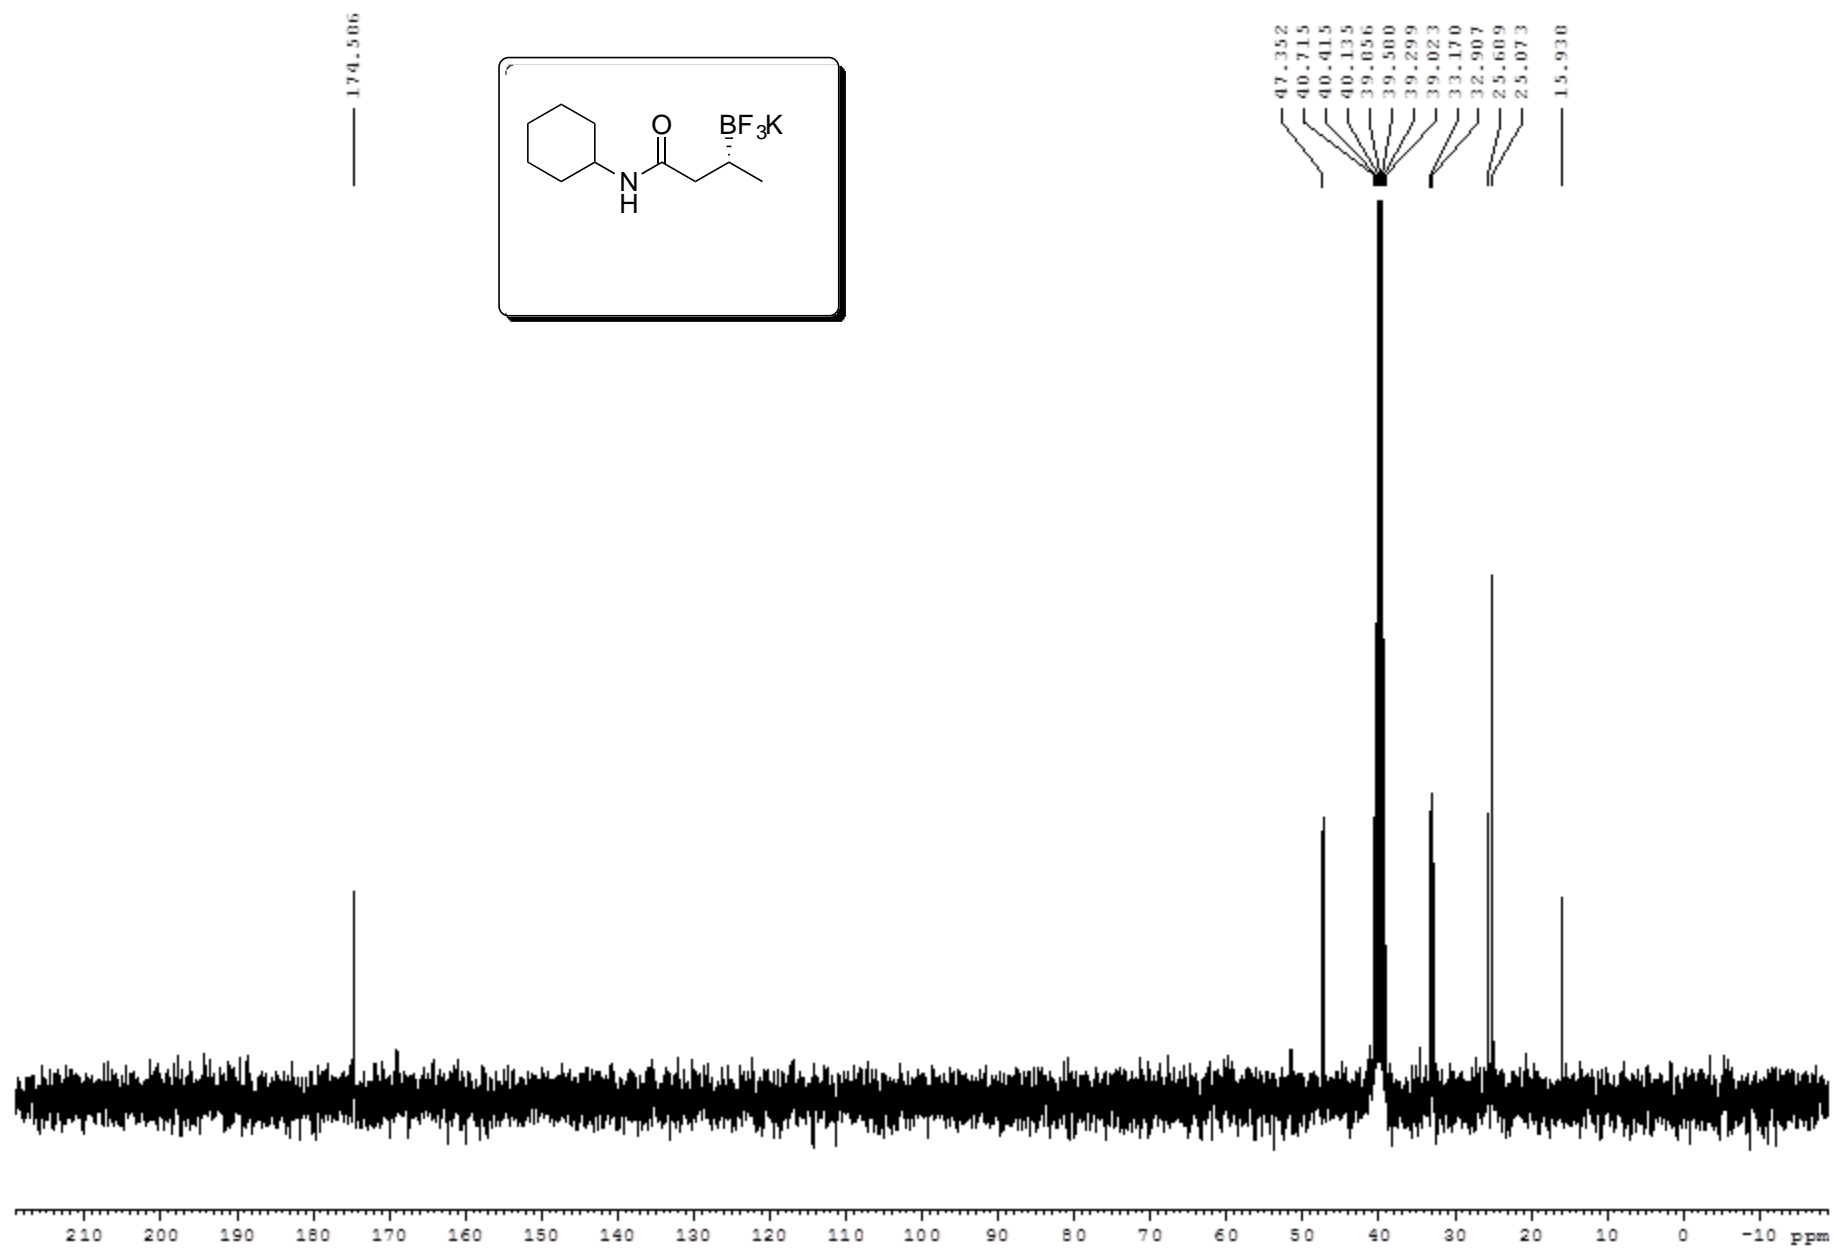

<sup>19</sup>F NMR (DMSO, 282.4 MHz) spectrum of potassium (*R*)-*N*-cyclohexyl-3-(trifluoroborato)butanamide (2d)

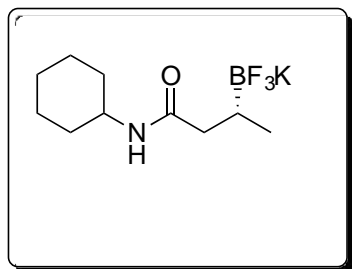

-144.770

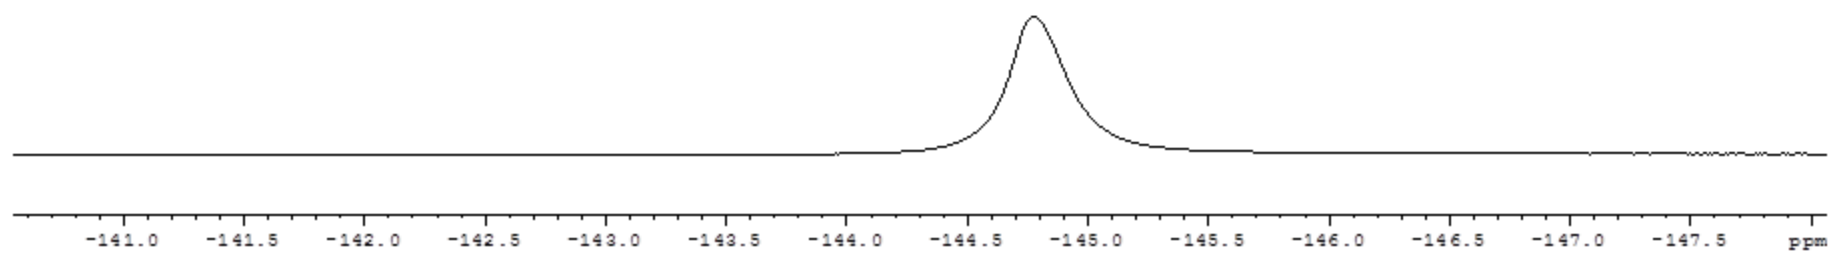

S101

<sup>11</sup>B NMR (DMSO, 128.4 MHz) spectrum of potassium (*R*)-*N*-cyclohexyl-3-(trifluoroborato)butanamide (2d)

5.201

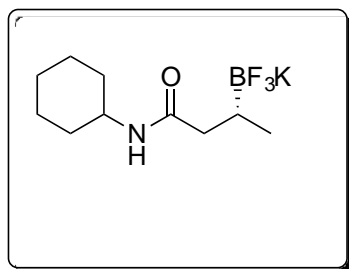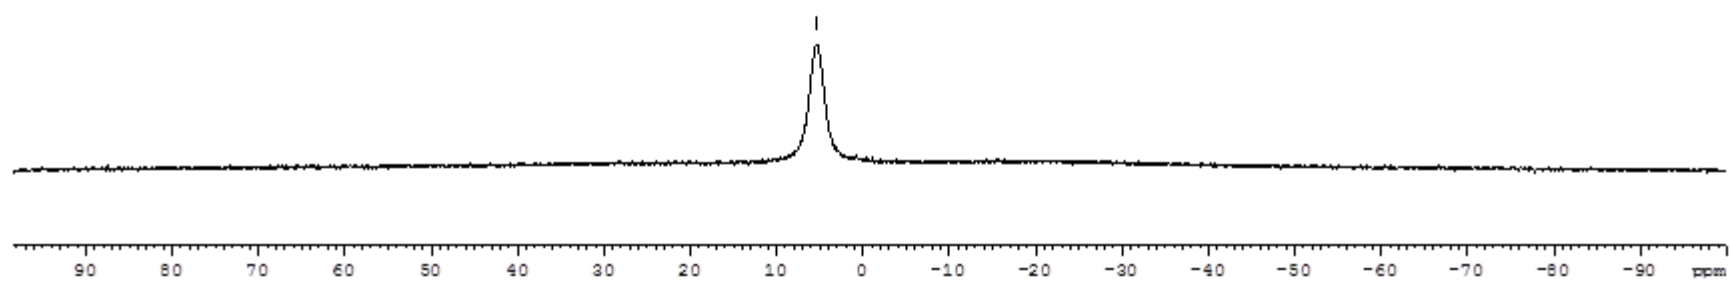

<sup>1</sup>H NMR (DMSO, 500 MHz) spectrum of potassium (*R*)-*N*-cyclopropyl-3-(trifluoroborato)butanamide (2e)

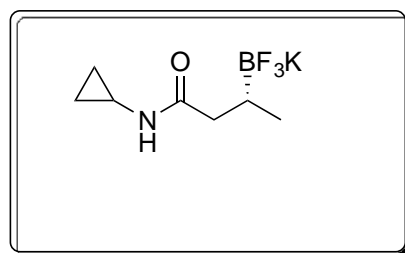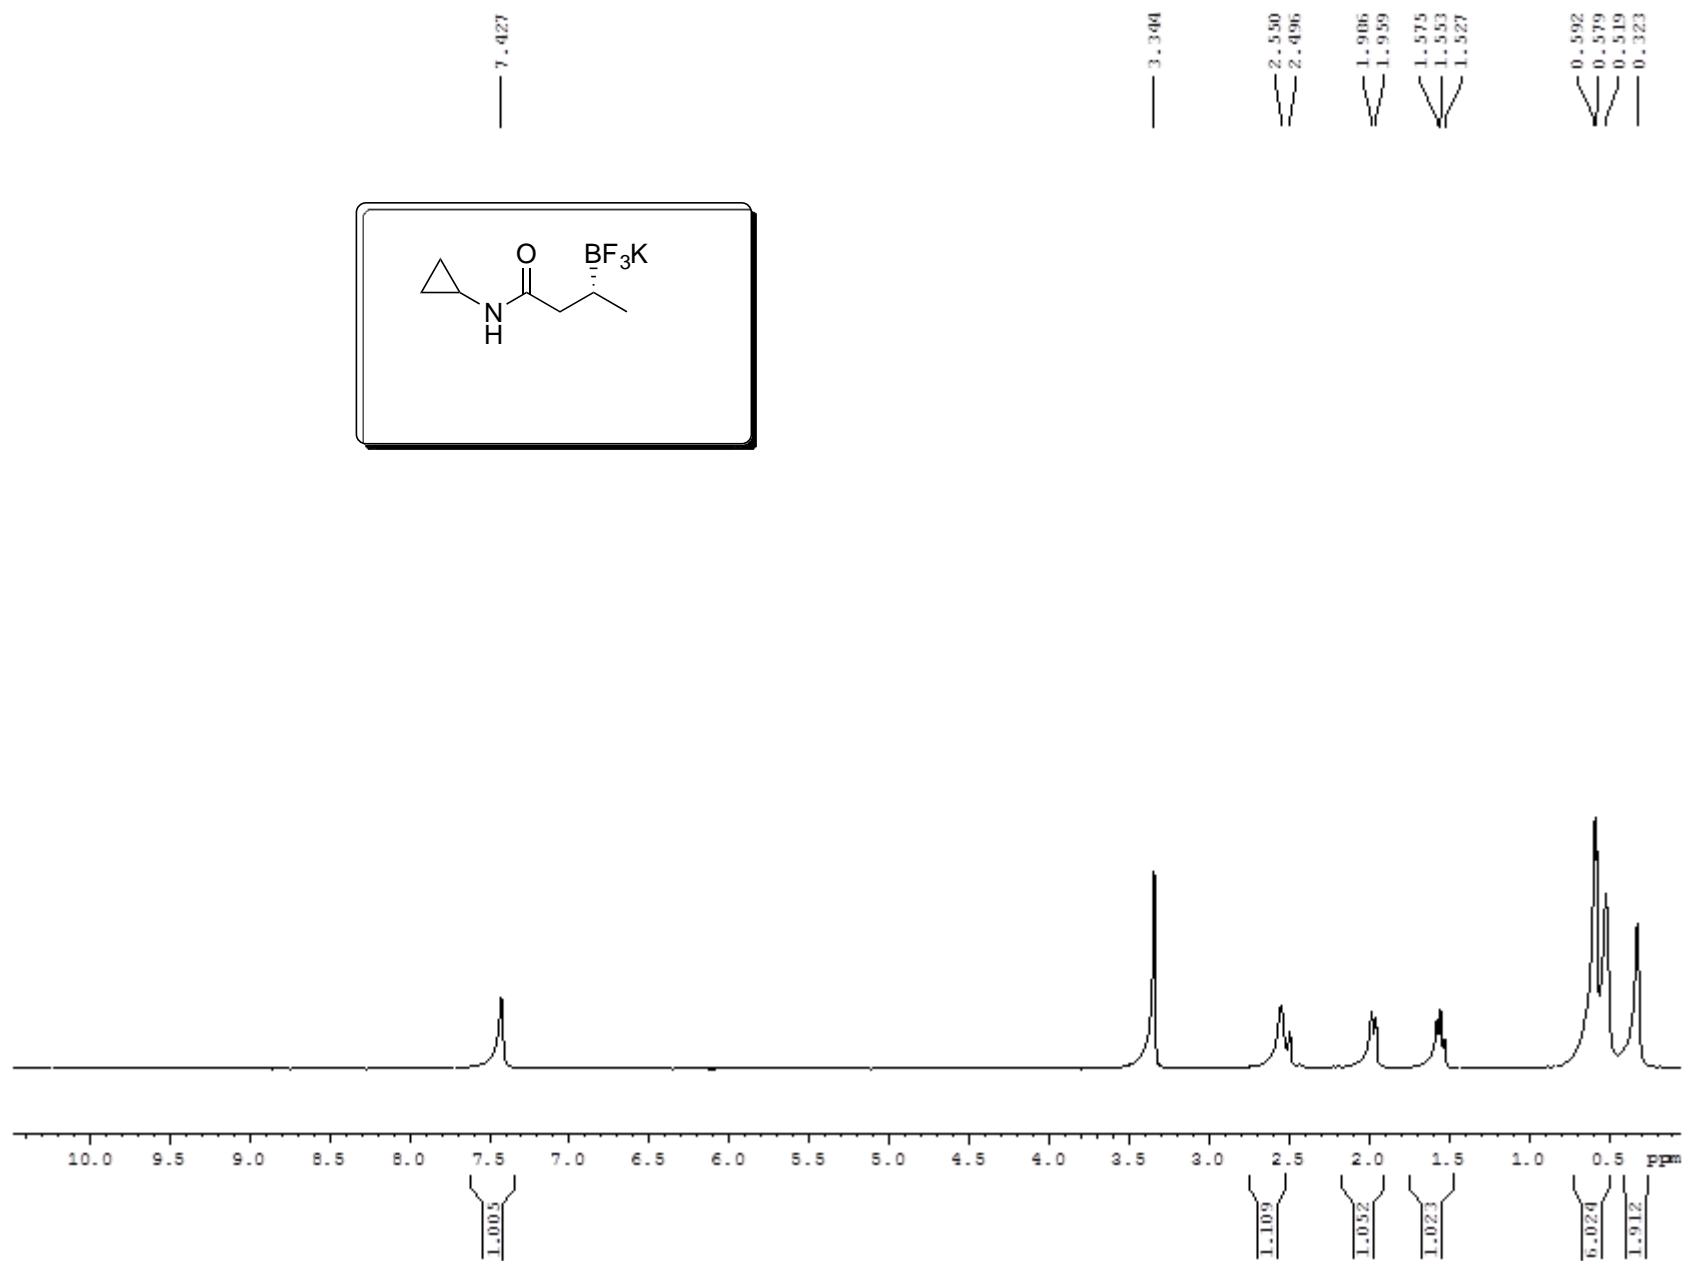

<sup>13</sup>C NMR (DMSO, 125.8 MHz) spectrum of potassium (*R*)-*N*-cyclopropyl-3-(trifluoroborato)butanamide (2e)

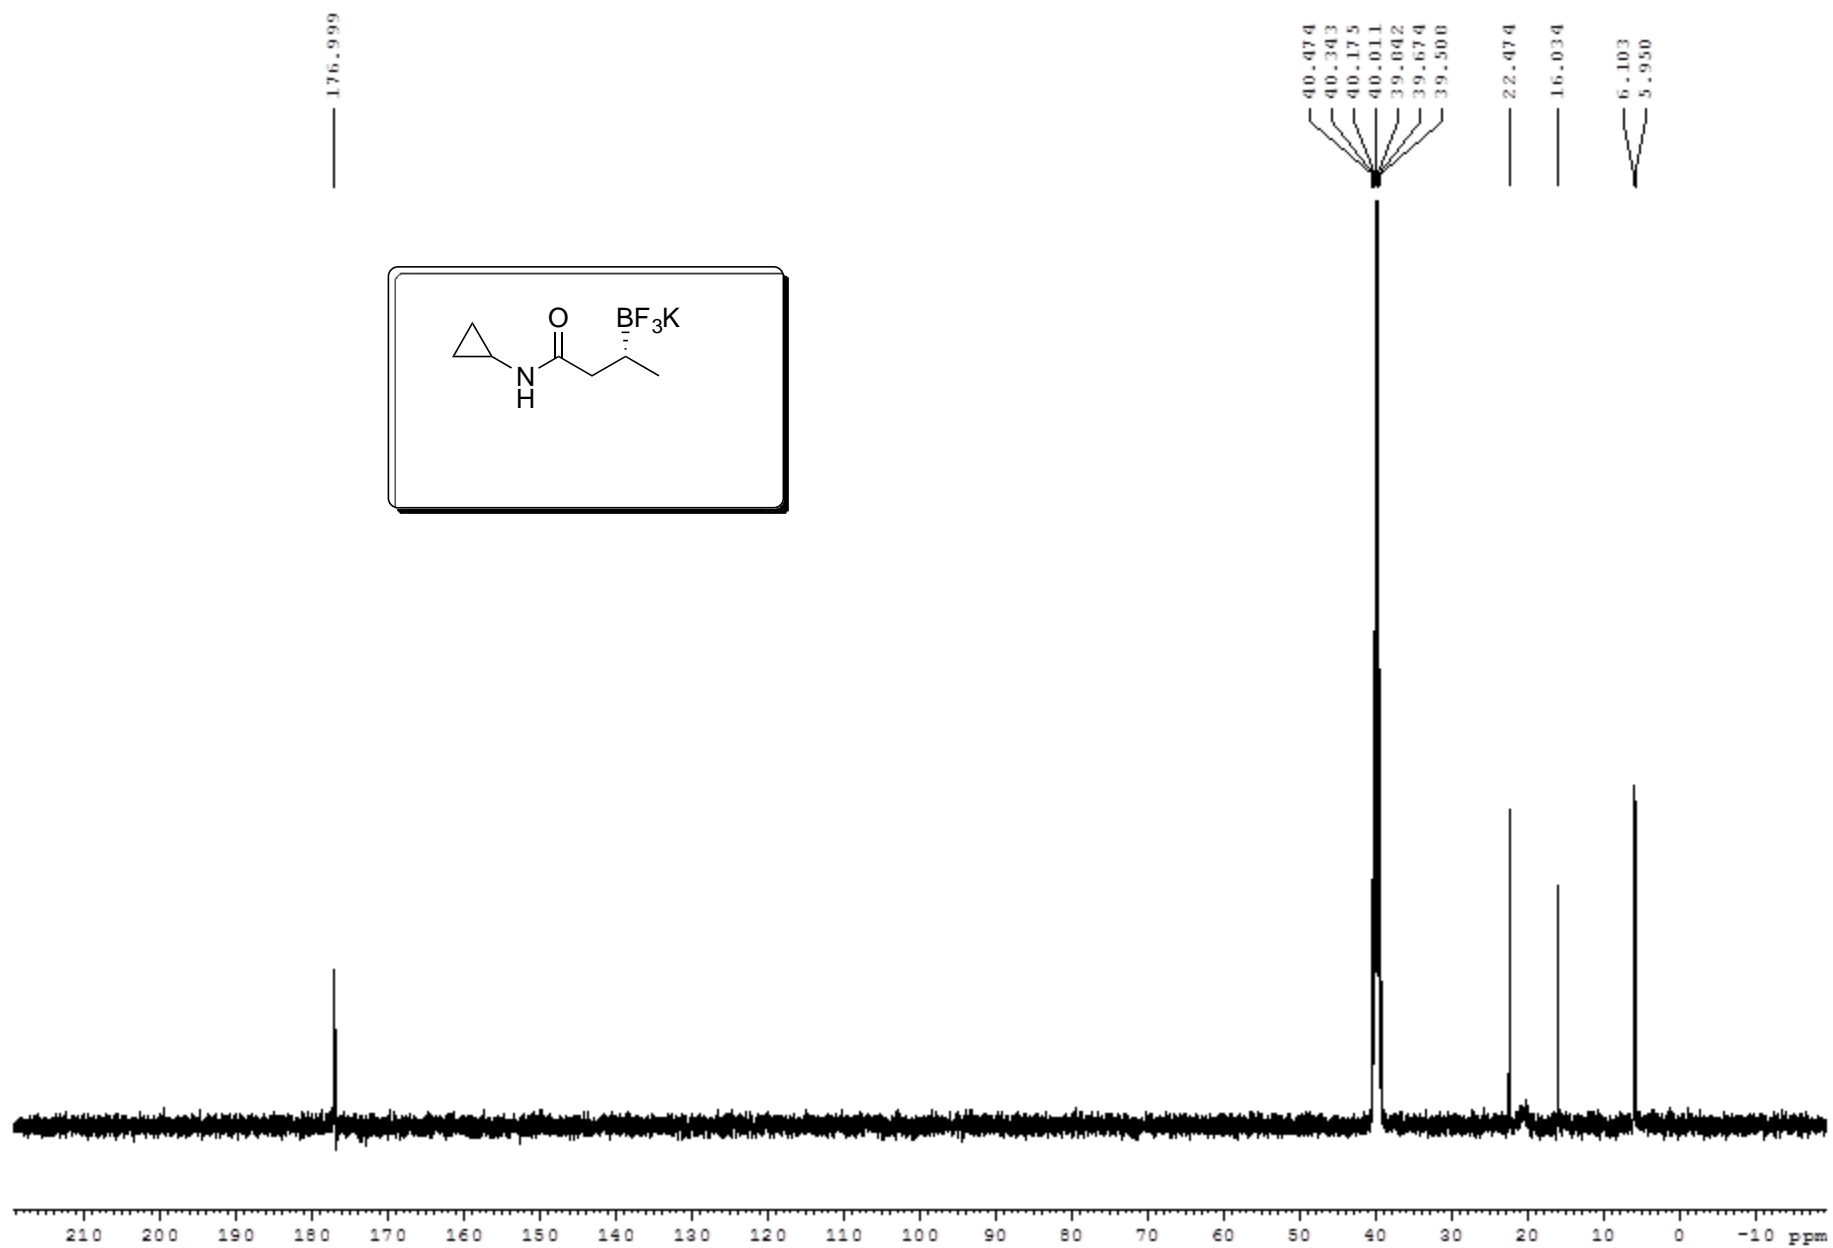



**$^{19}\text{F}$  NMR (DMSO, 470.8 MHz) spectrum of potassium (*R*)-*N*-cyclopropyl-3-(trifluoroborato)butanamide (2e)**

-144.954

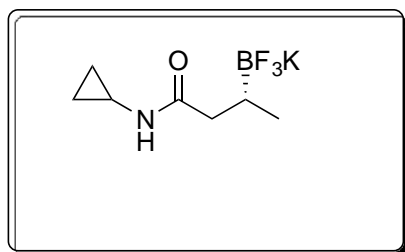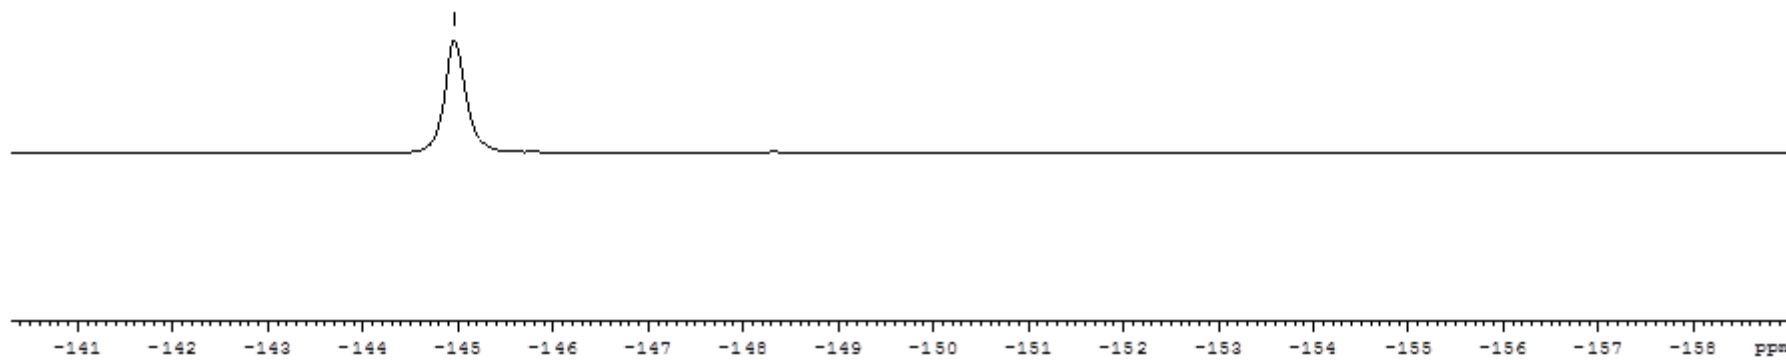

**$^{11}\text{B}$  NMR (DMSO, 128.4 MHz) spectrum of potassium (*R*)-*N*-cyclopropyl-3-(trifluoroborato)butanamide (2e)**

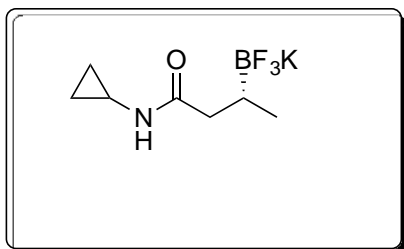

5.924

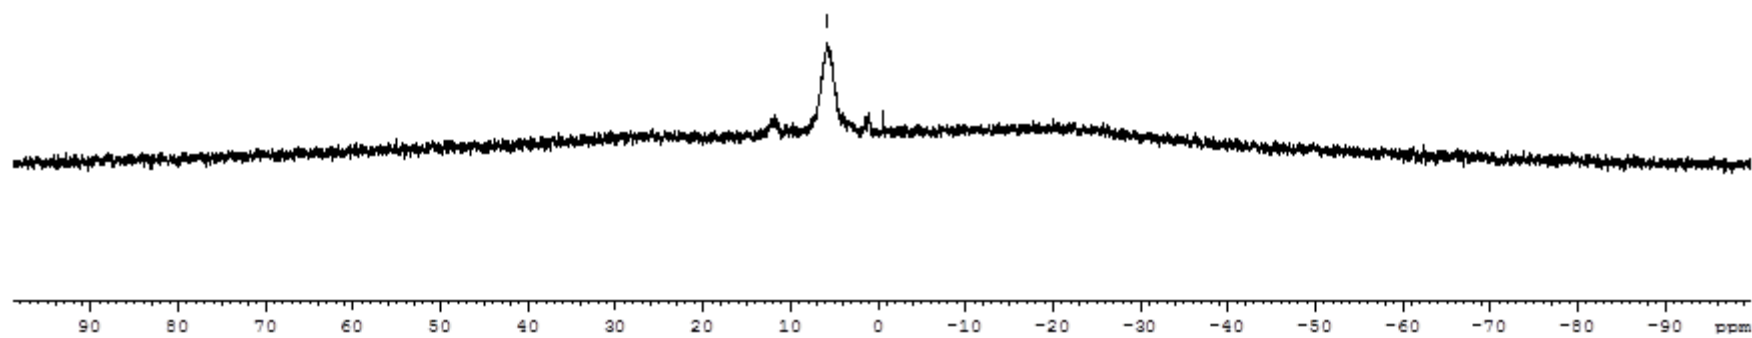

<sup>1</sup>H NMR (DMSO, 300 MHz) spectrum of Potassium (*R*)-*N*-cyclohexyl-3-(trifluoroborato)pentanamide (2f)

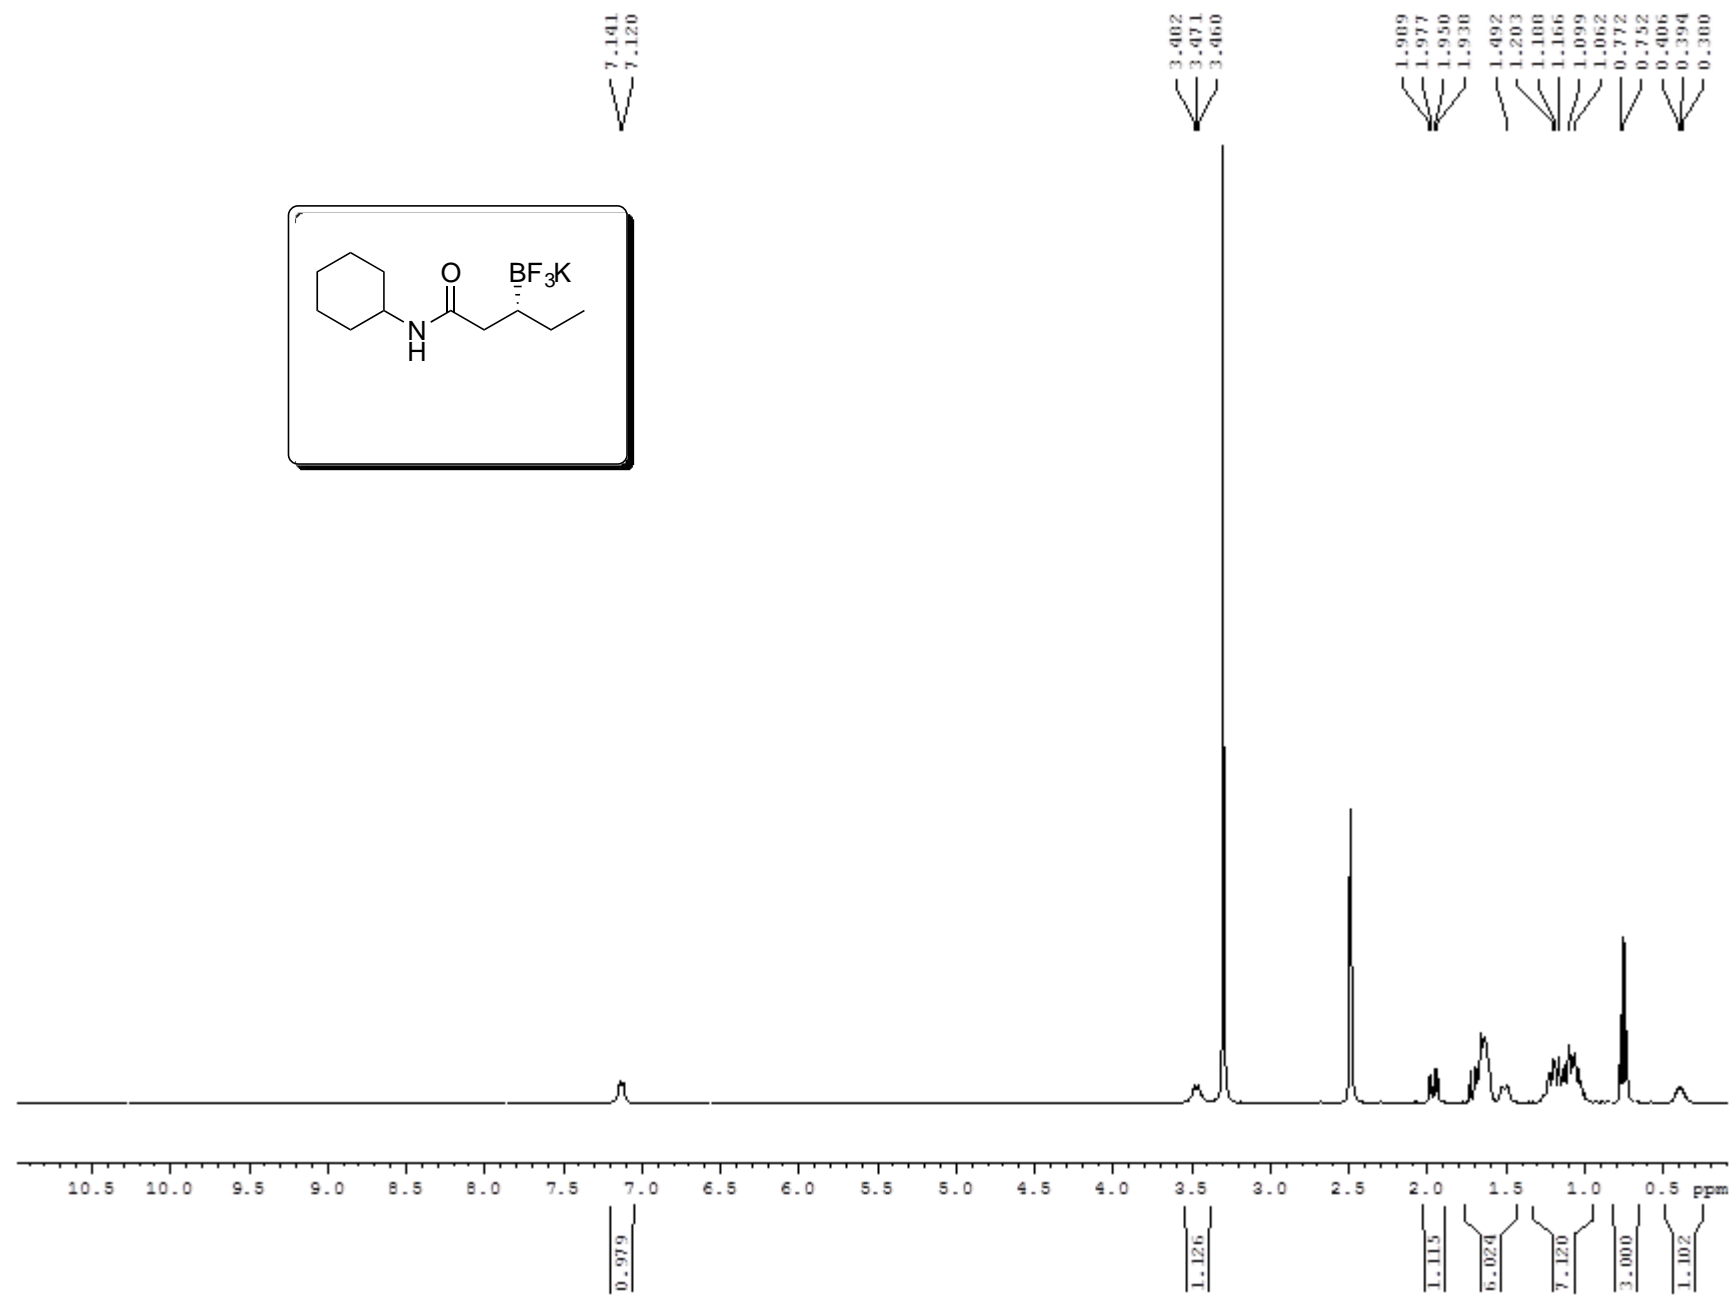

$^{13}\text{C}$  NMR (DMSO, 75.4 MHz) spectrum of **Potassium (*R*)-*N*-cyclohexyl-3-(trifluoroborato)pentanamide (2f)**

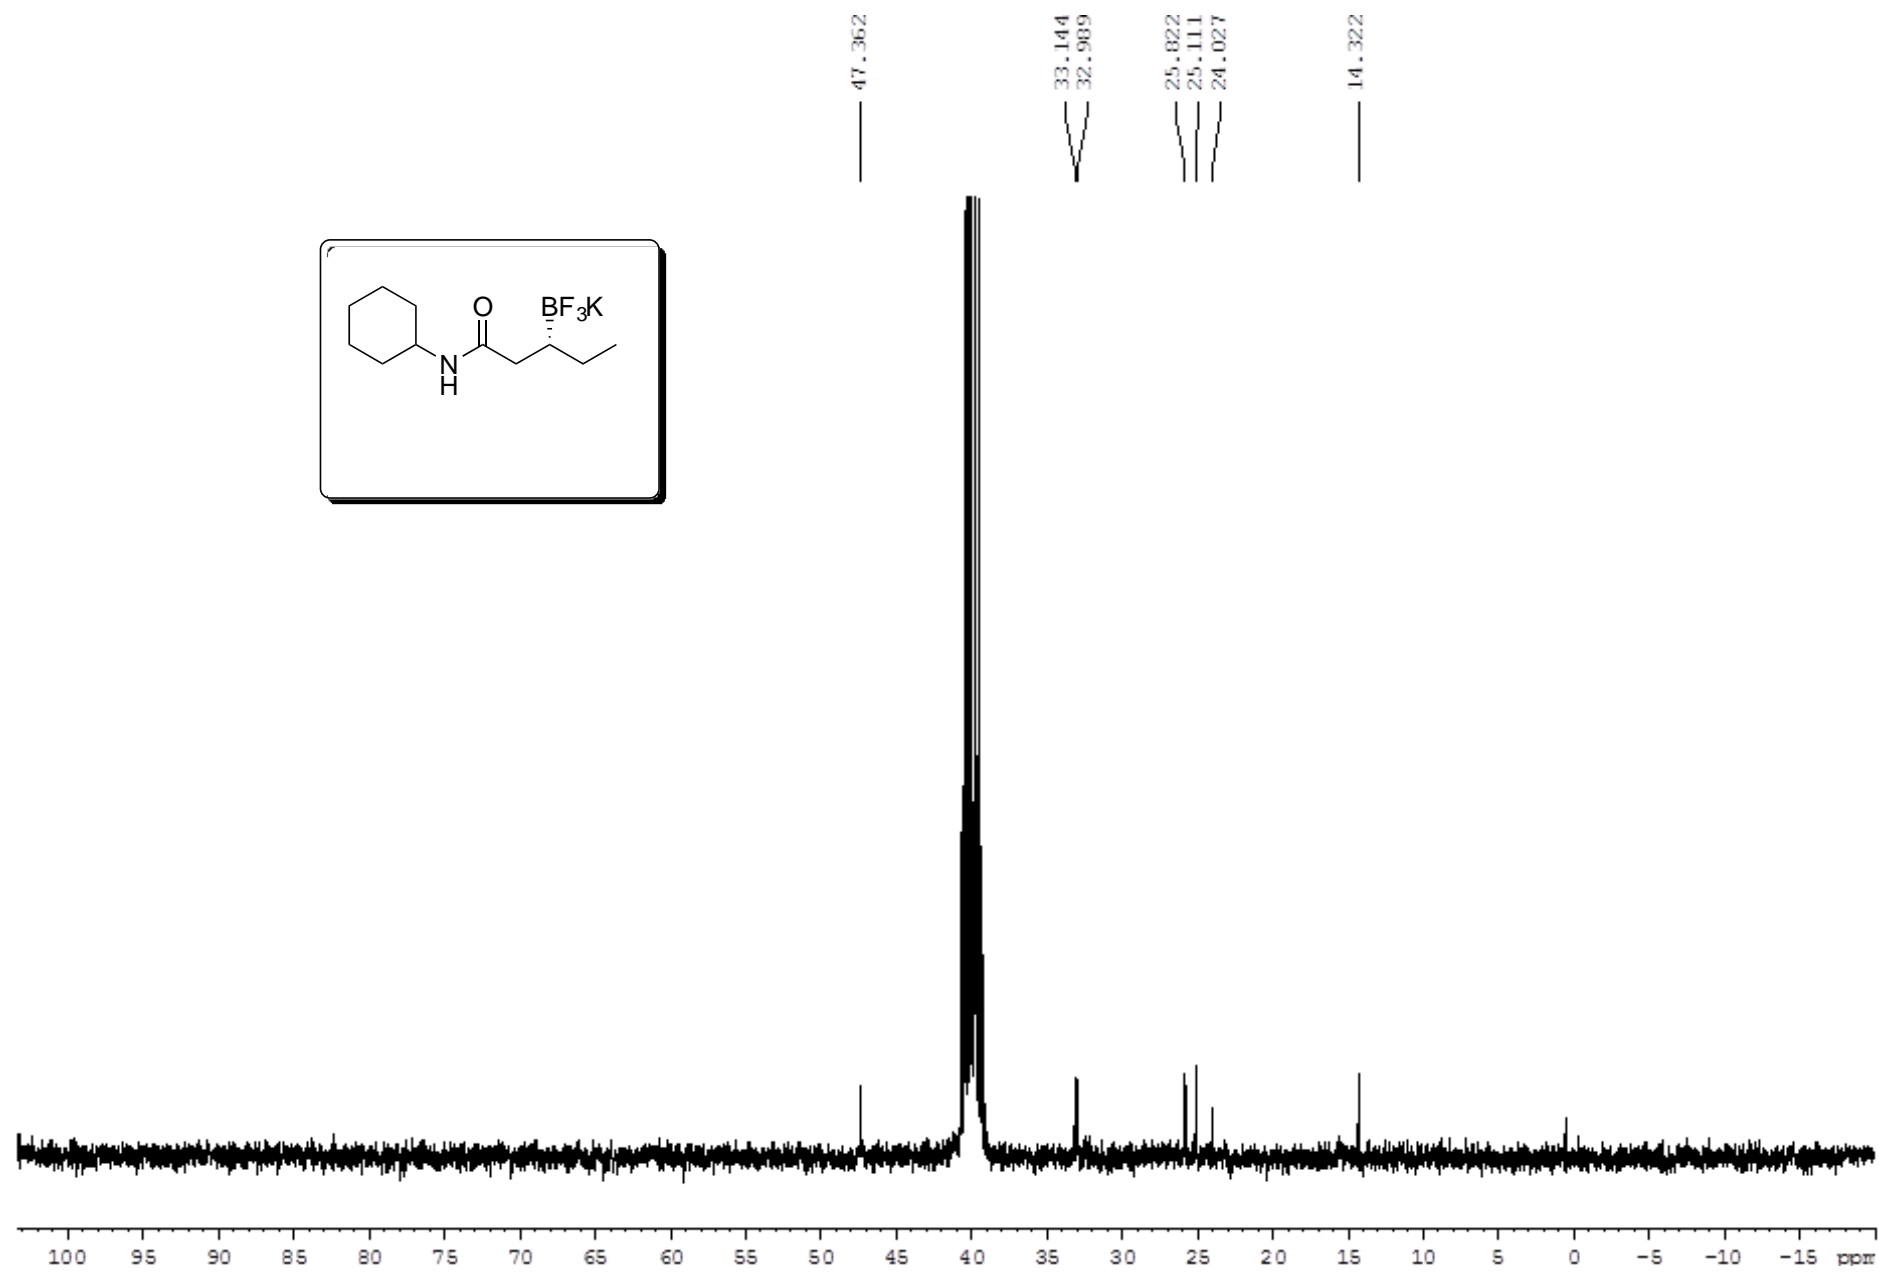

S108

<sup>19</sup>F NMR (DMSO, 338.8 MHz) spectrum of Potassium (*R*)-*N*-cyclohexyl-3-(trifluoroborato)pentanamide (2f)

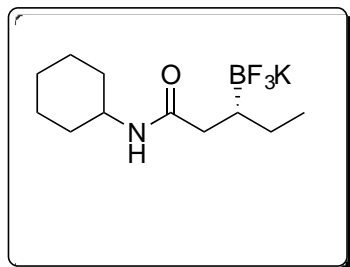

-141.090  
-141.179  
-141.336

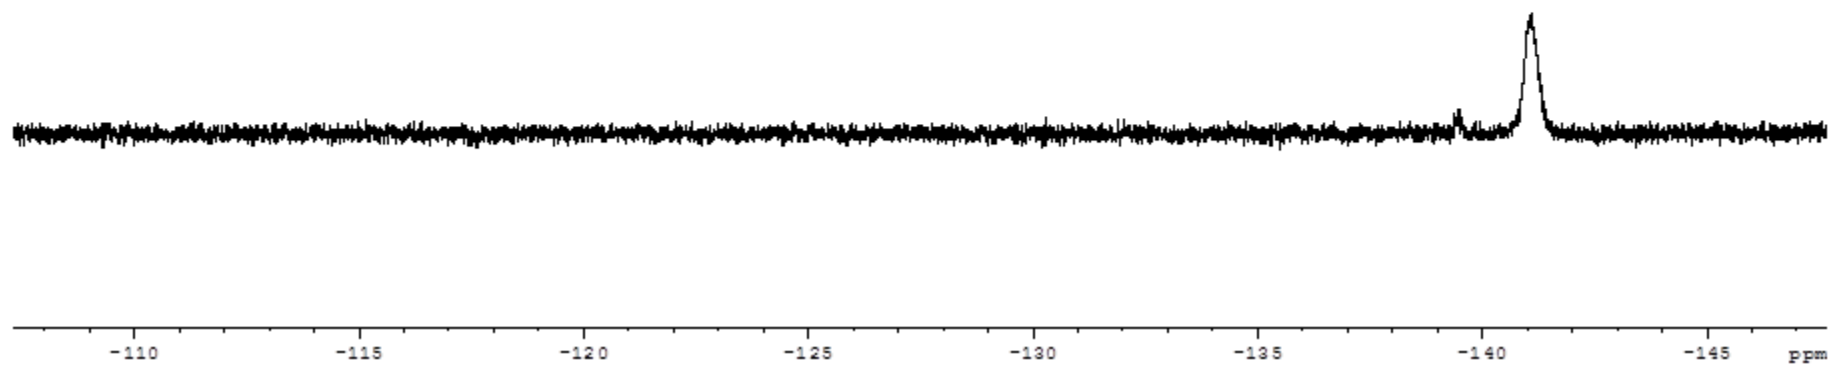

$^{11}\text{B}$  NMR (DMSO, 128.4 MHz) spectrum of Potassium (*R*)-*N*-cyclohexyl-3-(trifluoroborato)pentanamide (2f)

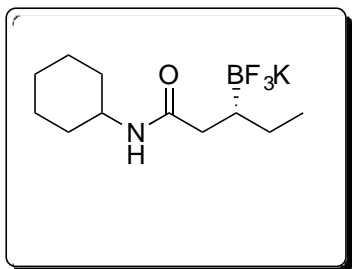

5.462

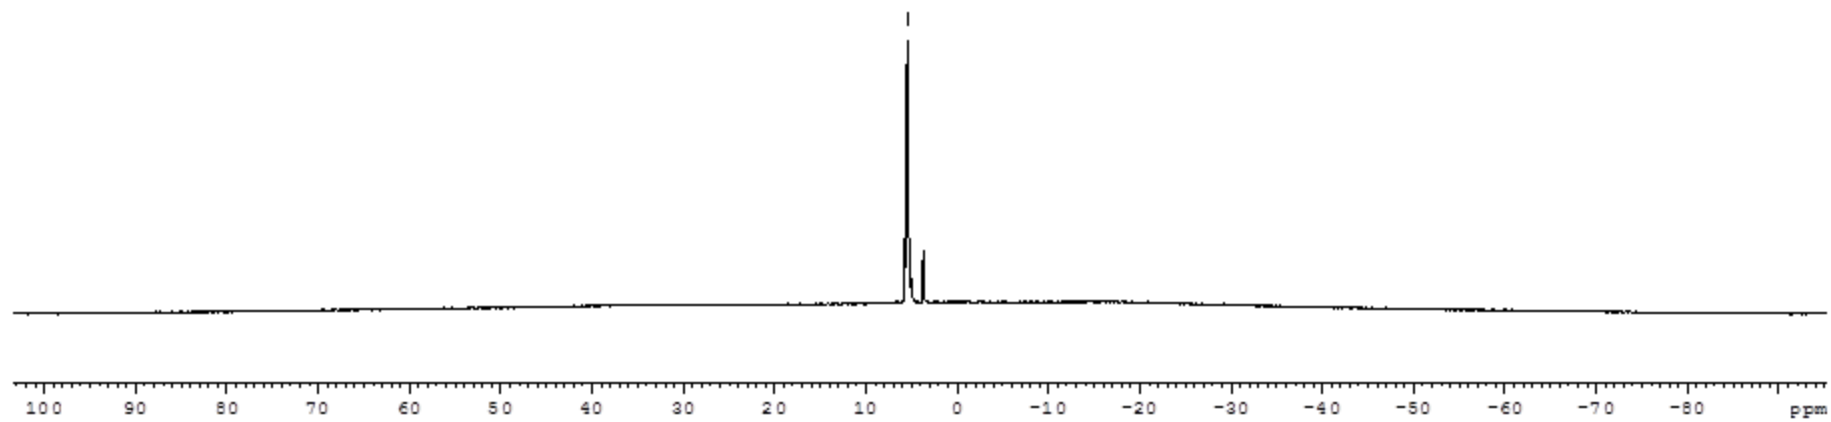

S110

<sup>1</sup>H NMR (Acetone, 500 MHz) spectrum of potassium 1-(piperidin-1-yl)-3-(trifluoroborato)butan-1-one (2g)

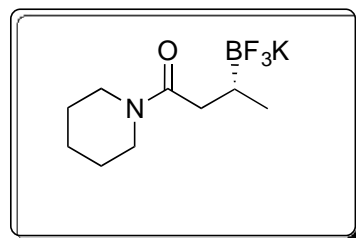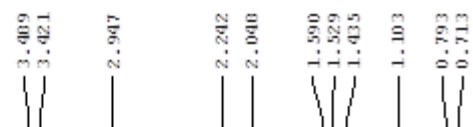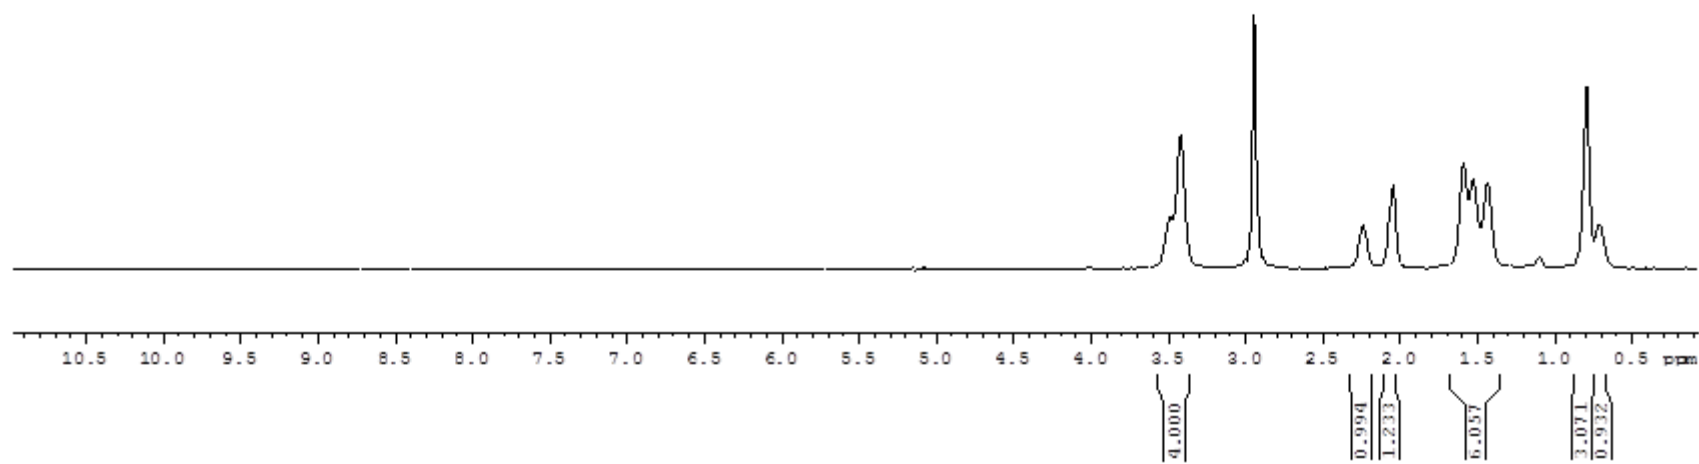

<sup>13</sup>C NMR (Aceton, 125.8 MHz) spectrum of potassium 1-(piperidin-1-yl)-3-(trifluoroborato)butan-1-one (2g)

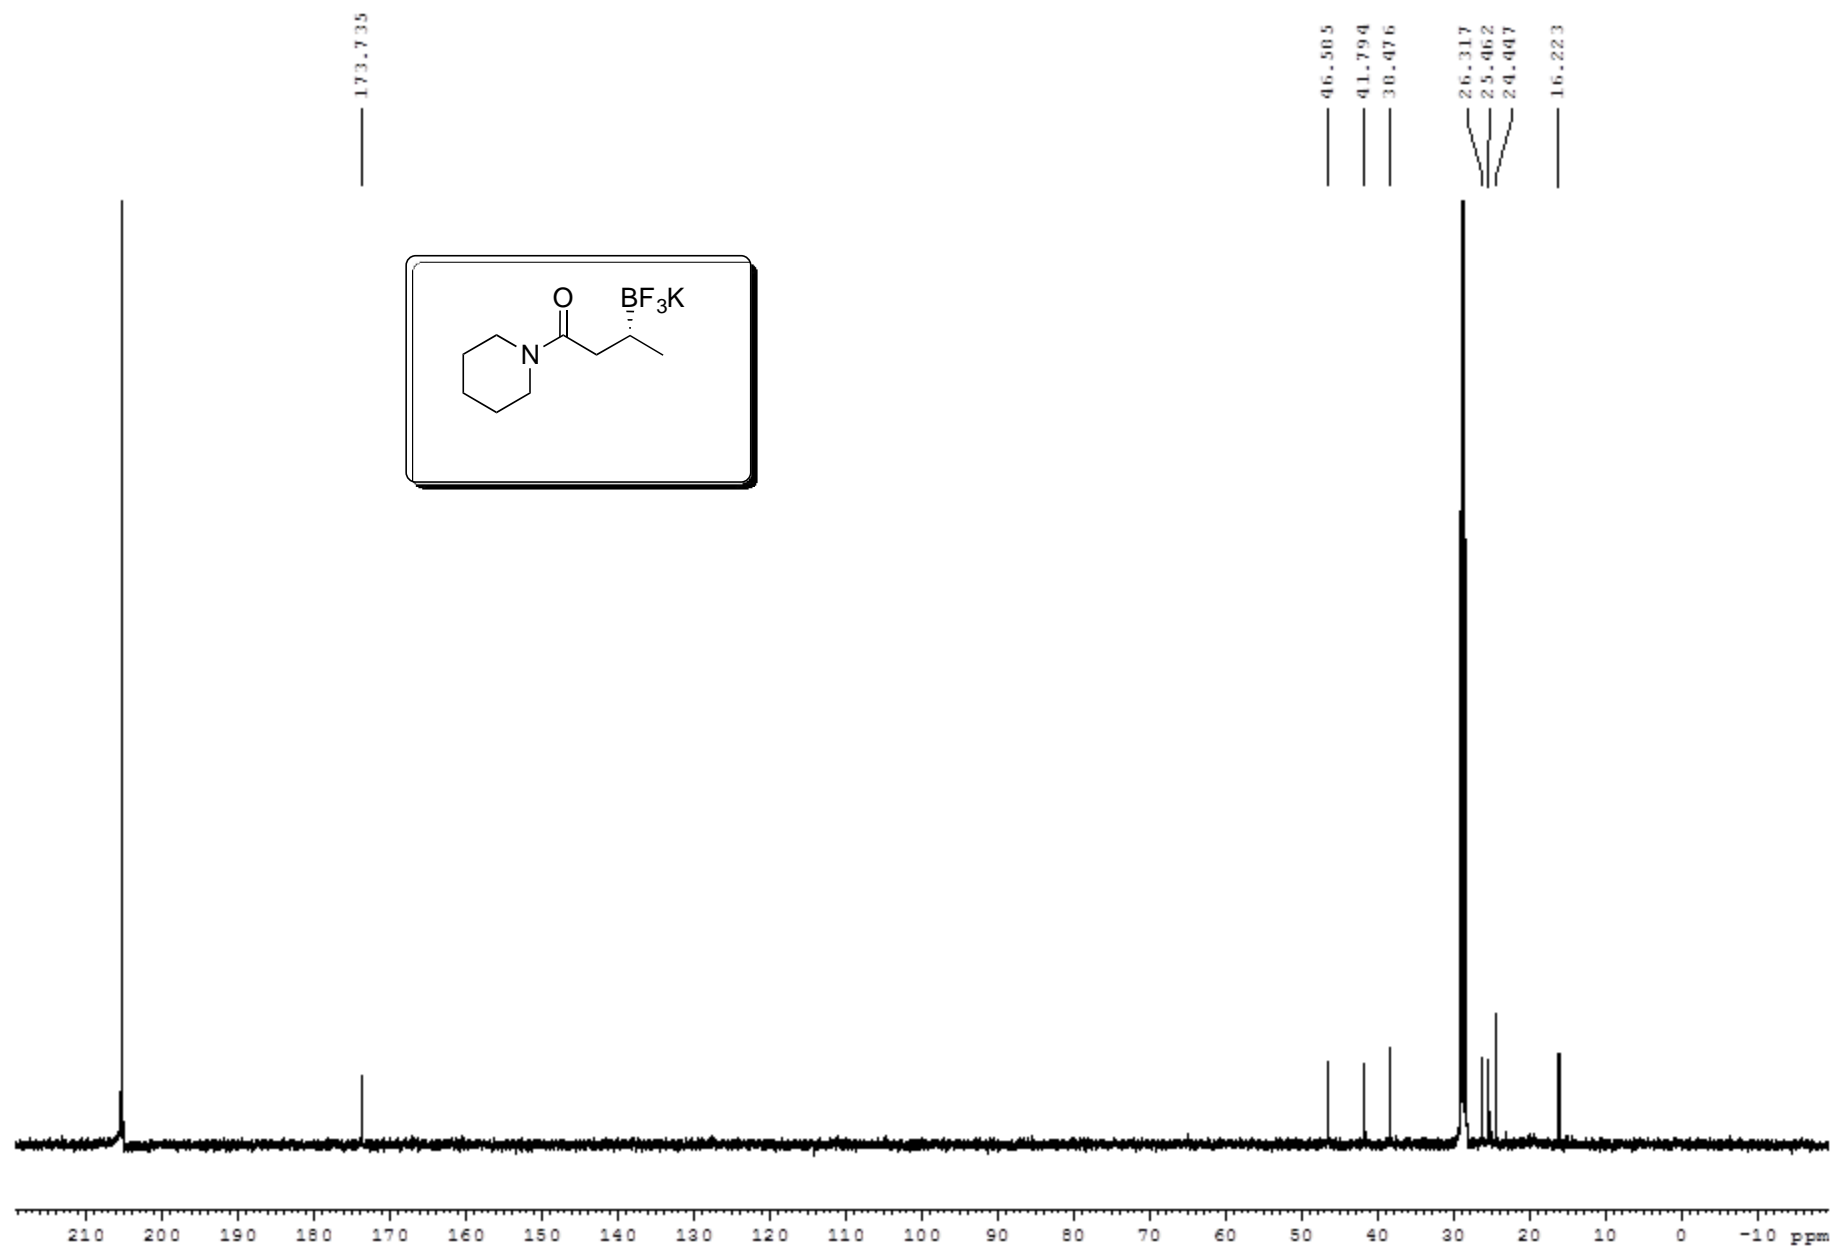



<sup>19</sup>F NMR (Aceton, 470.8 MHz) spectrum of potassium 1-(piperidin-1-yl)-3-(trifluoroborato)butan-1-one (2g)

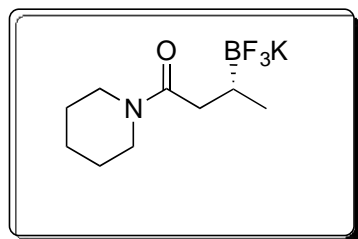

-147.662

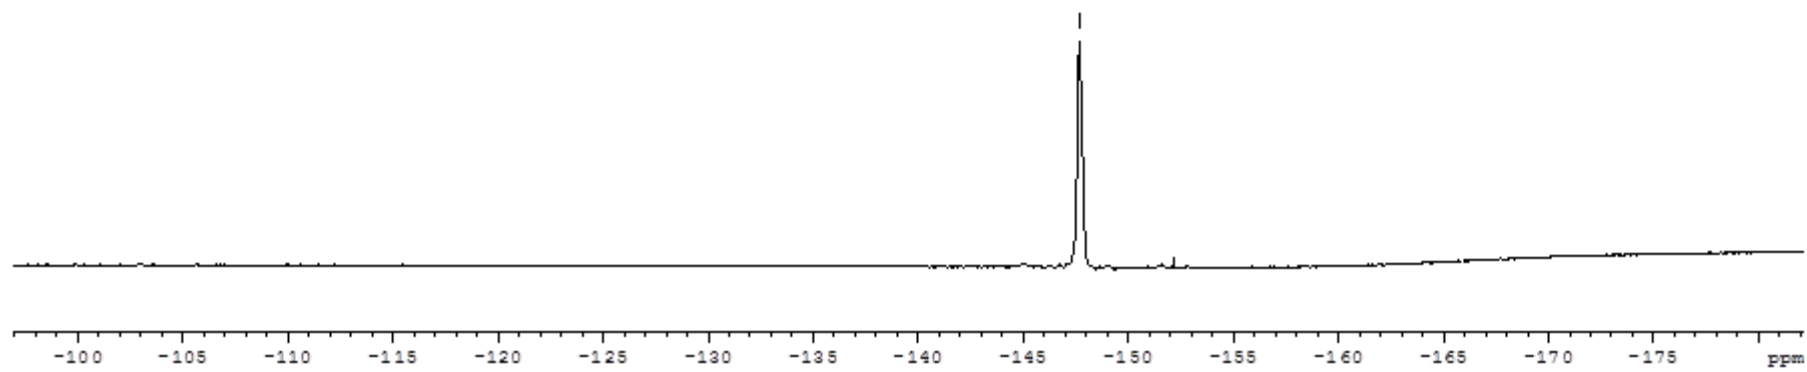

S113

**$^{11}\text{B}$  NMR (Acetone, 128.4 MHz) spectrum of potassium 1-(piperidin-1-yl)-3-(trifluoroborato)butan-1-one (2g)**

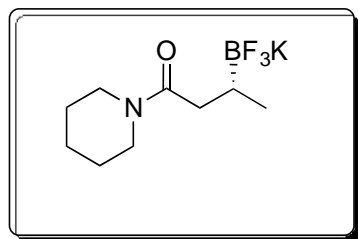

5.445

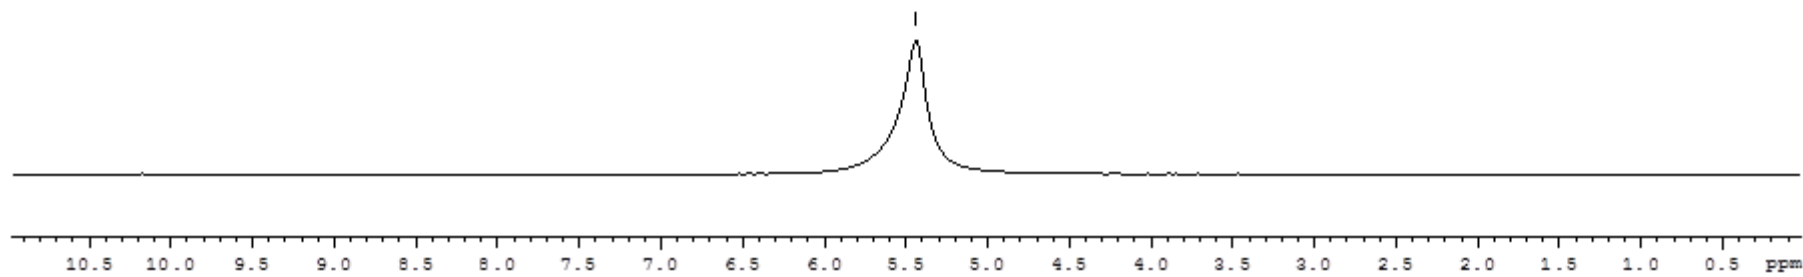

S114

<sup>1</sup>H NMR (DMSO, 500 MHz) spectrum of potassium (*R*)-1-morpholino-3-(trifluoroborato)butan-1-one (2h)

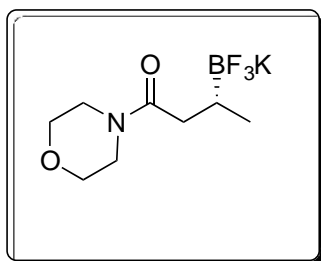

3.516  
3.390  
3.322

2.496  
2.302  
2.276

1.754  
1.731  
1.707

0.660  
0.659  
0.456

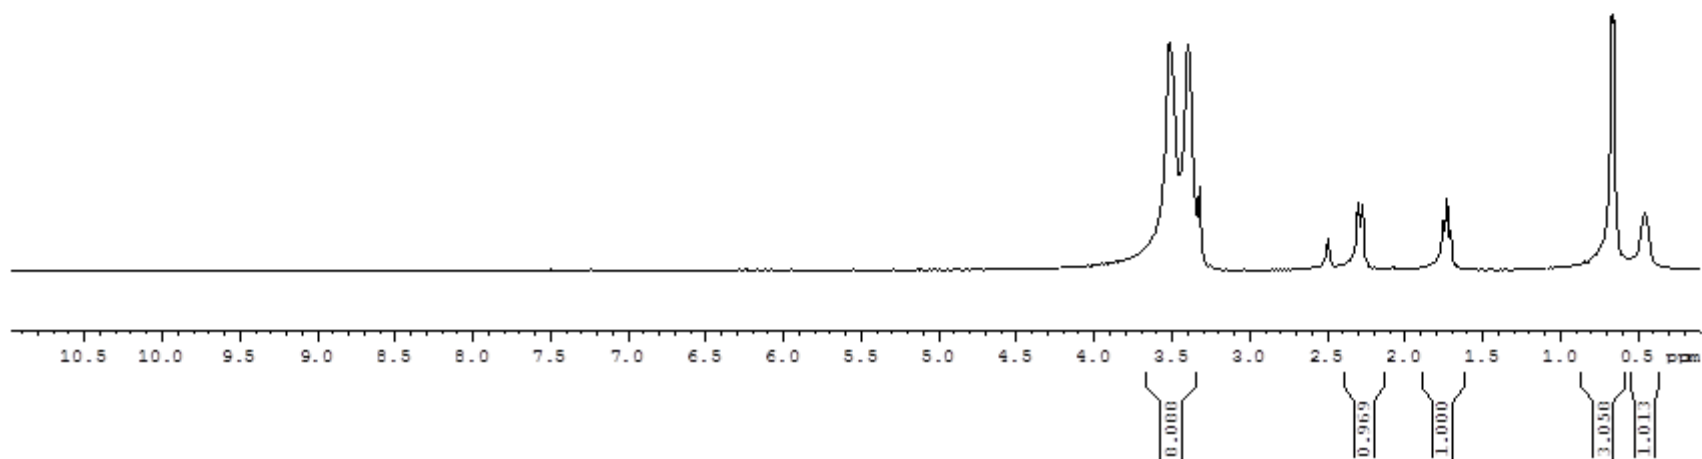

<sup>13</sup>C NMR (DMSO, 125.8 MHz) spectrum of potassium (*R*)-1-morpholino-3-(trifluoroborato)butan-1-one (2h)

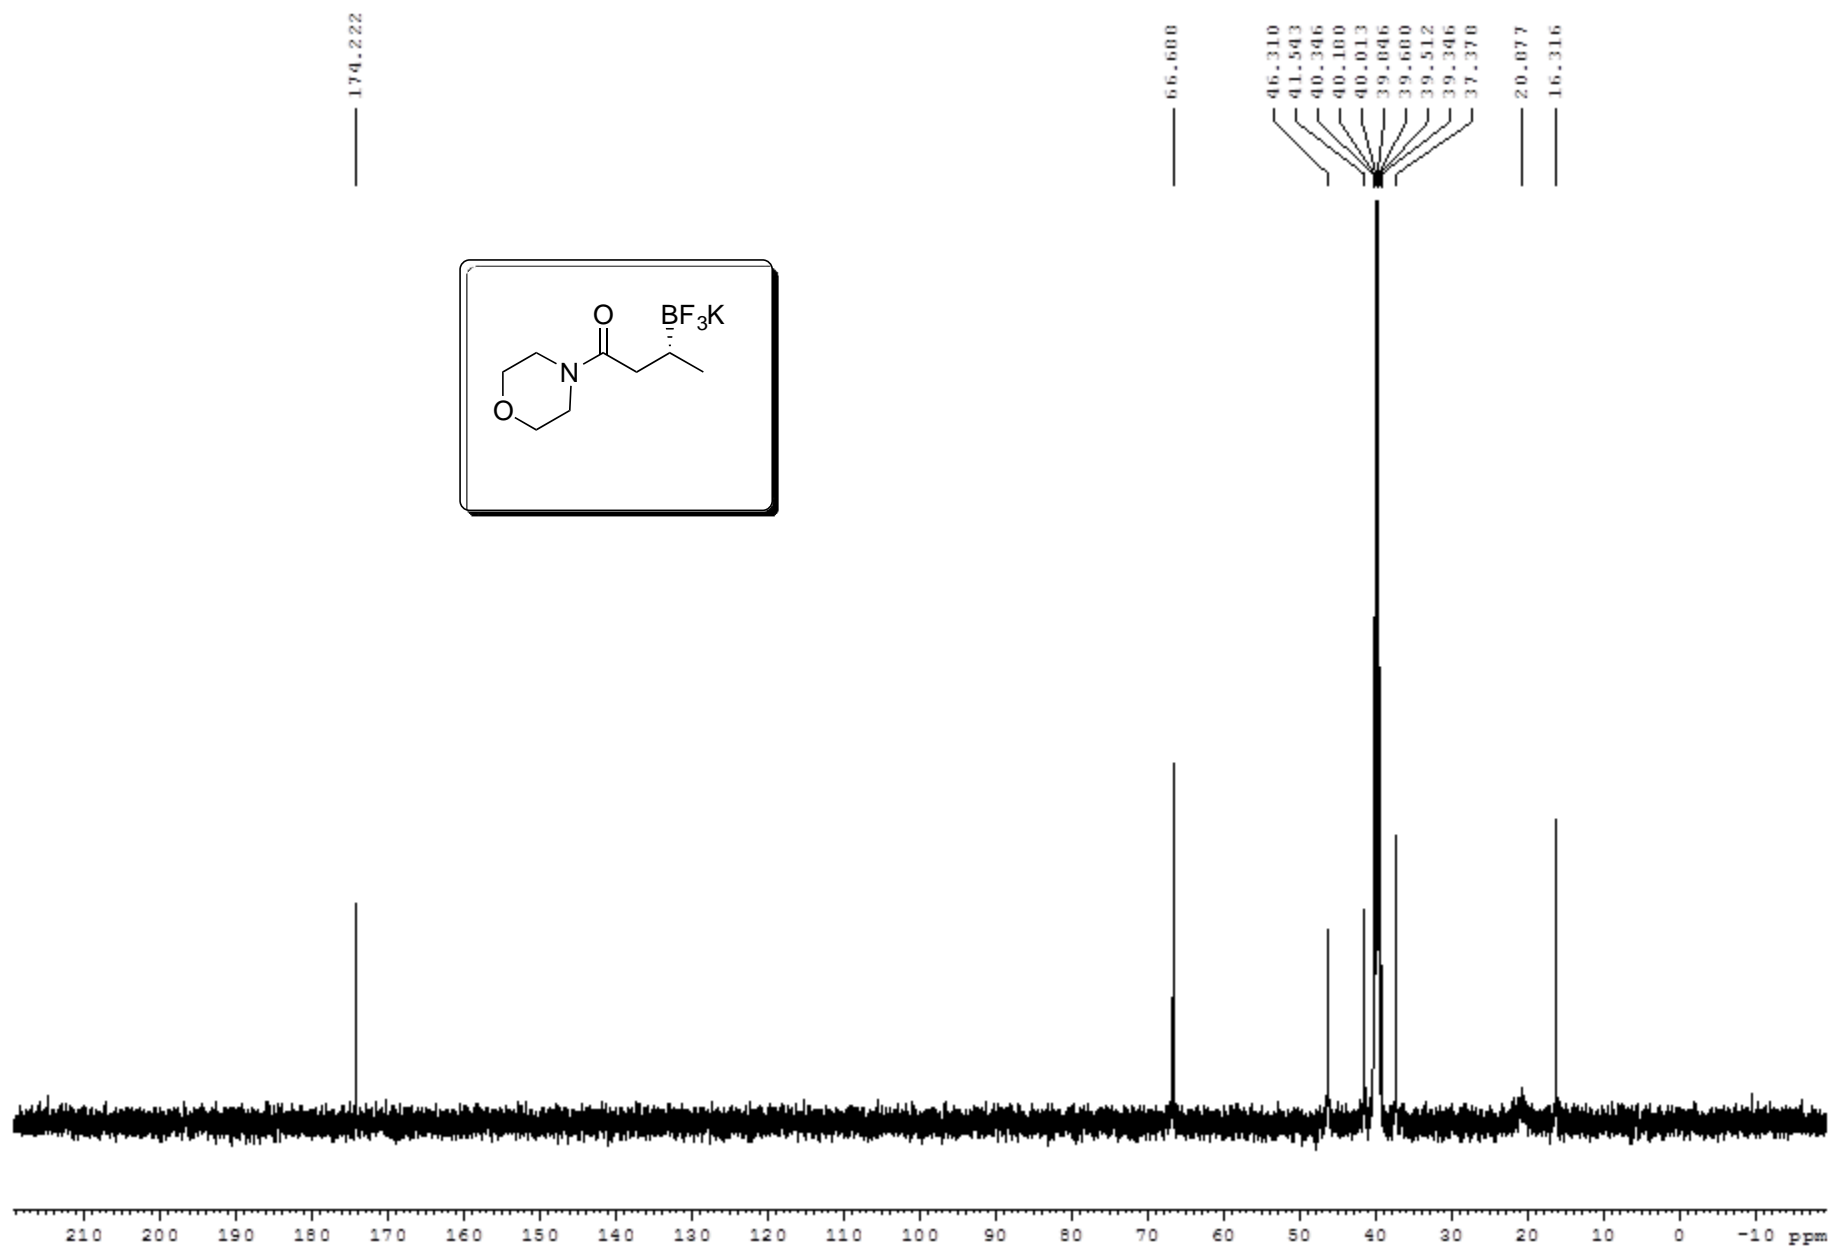

**$^{19}\text{F}$  NMR (DMSO, 470.8 MHz) spectrum of potassium (*R*)-1-morpholino-3-(trifluoroborato)butan-1-one (2h)**

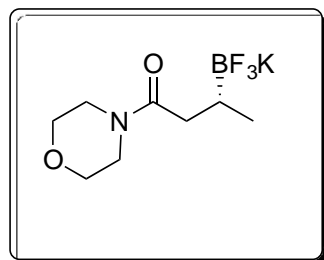

-145.700

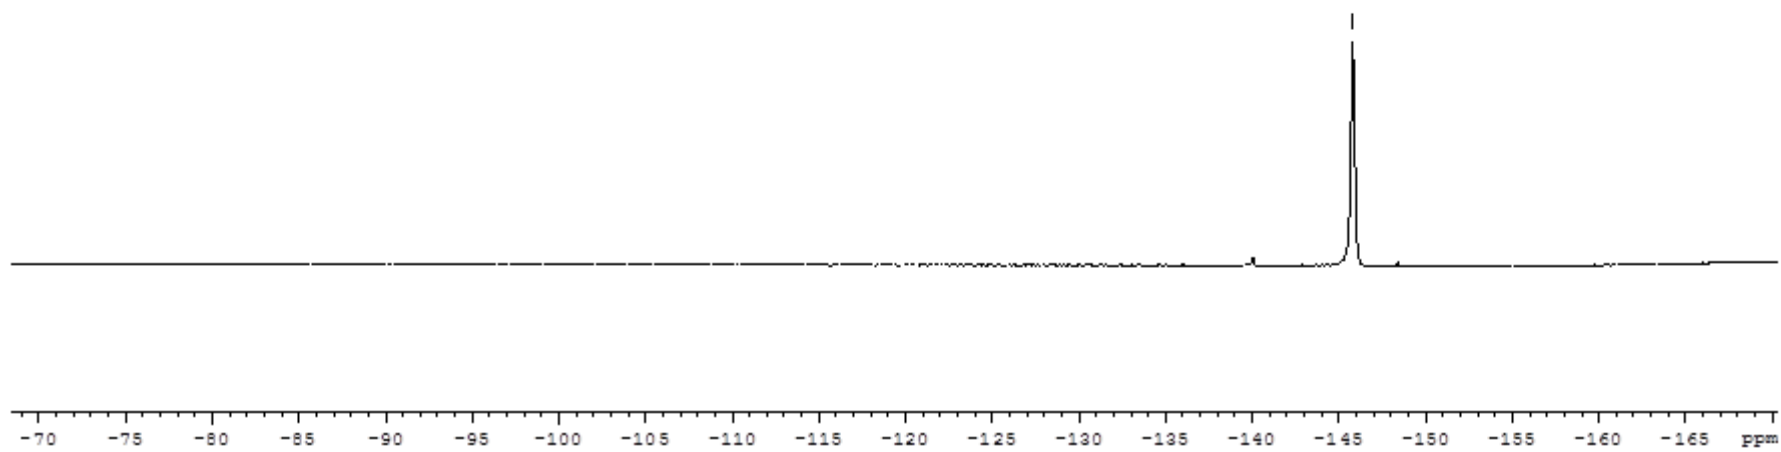

**$^{11}\text{B}$  NMR (Acetone, 128.4 MHz) spectrum of potassium (*R*)-1-morpholino-3-(trifluoroborato)butan-1-one (2h)**

— 4.301

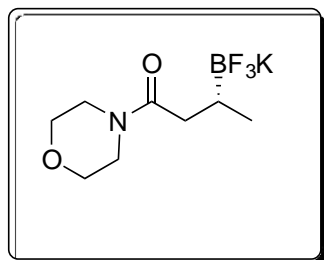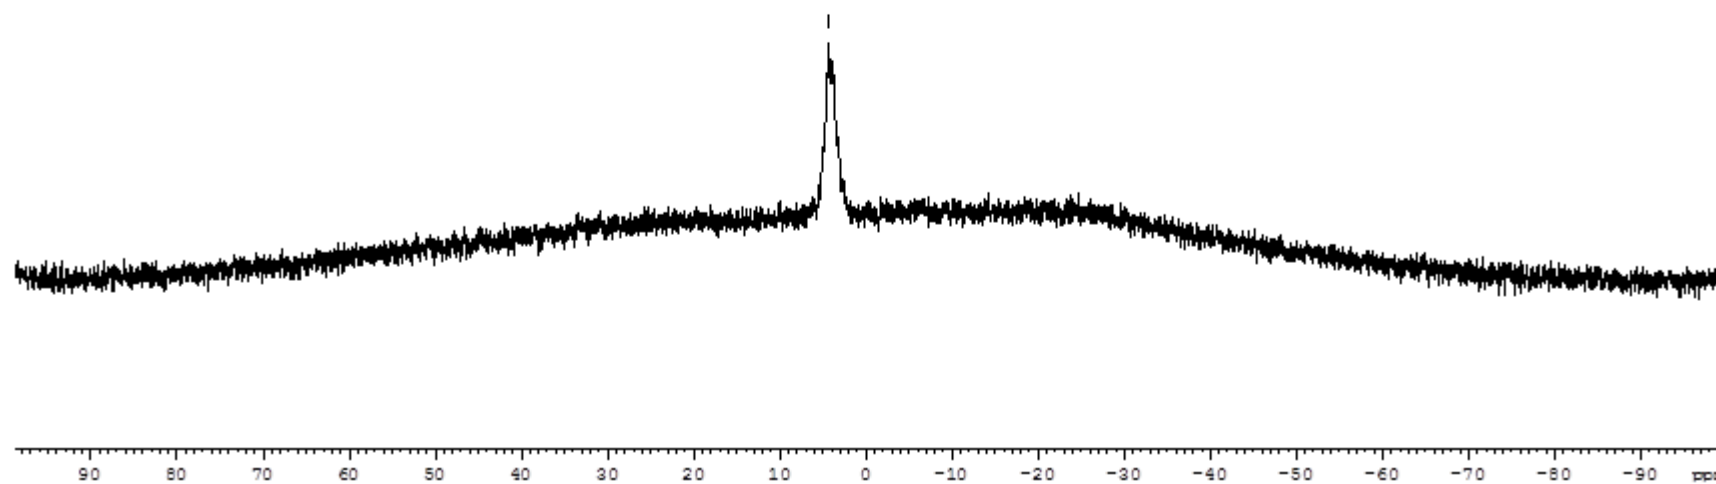

<sup>1</sup>H NMR (Acetone, 300 MHz) spectrum of potassium (S)-N-(4-methoxyphenyl)-3-phenyl-3-(trifluoroborato)propanamide (2i)

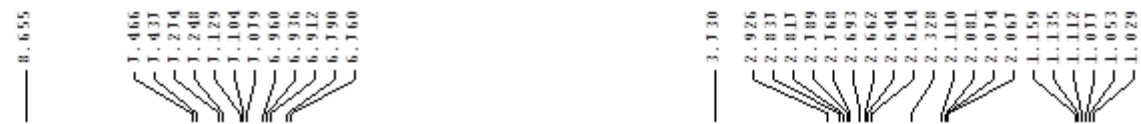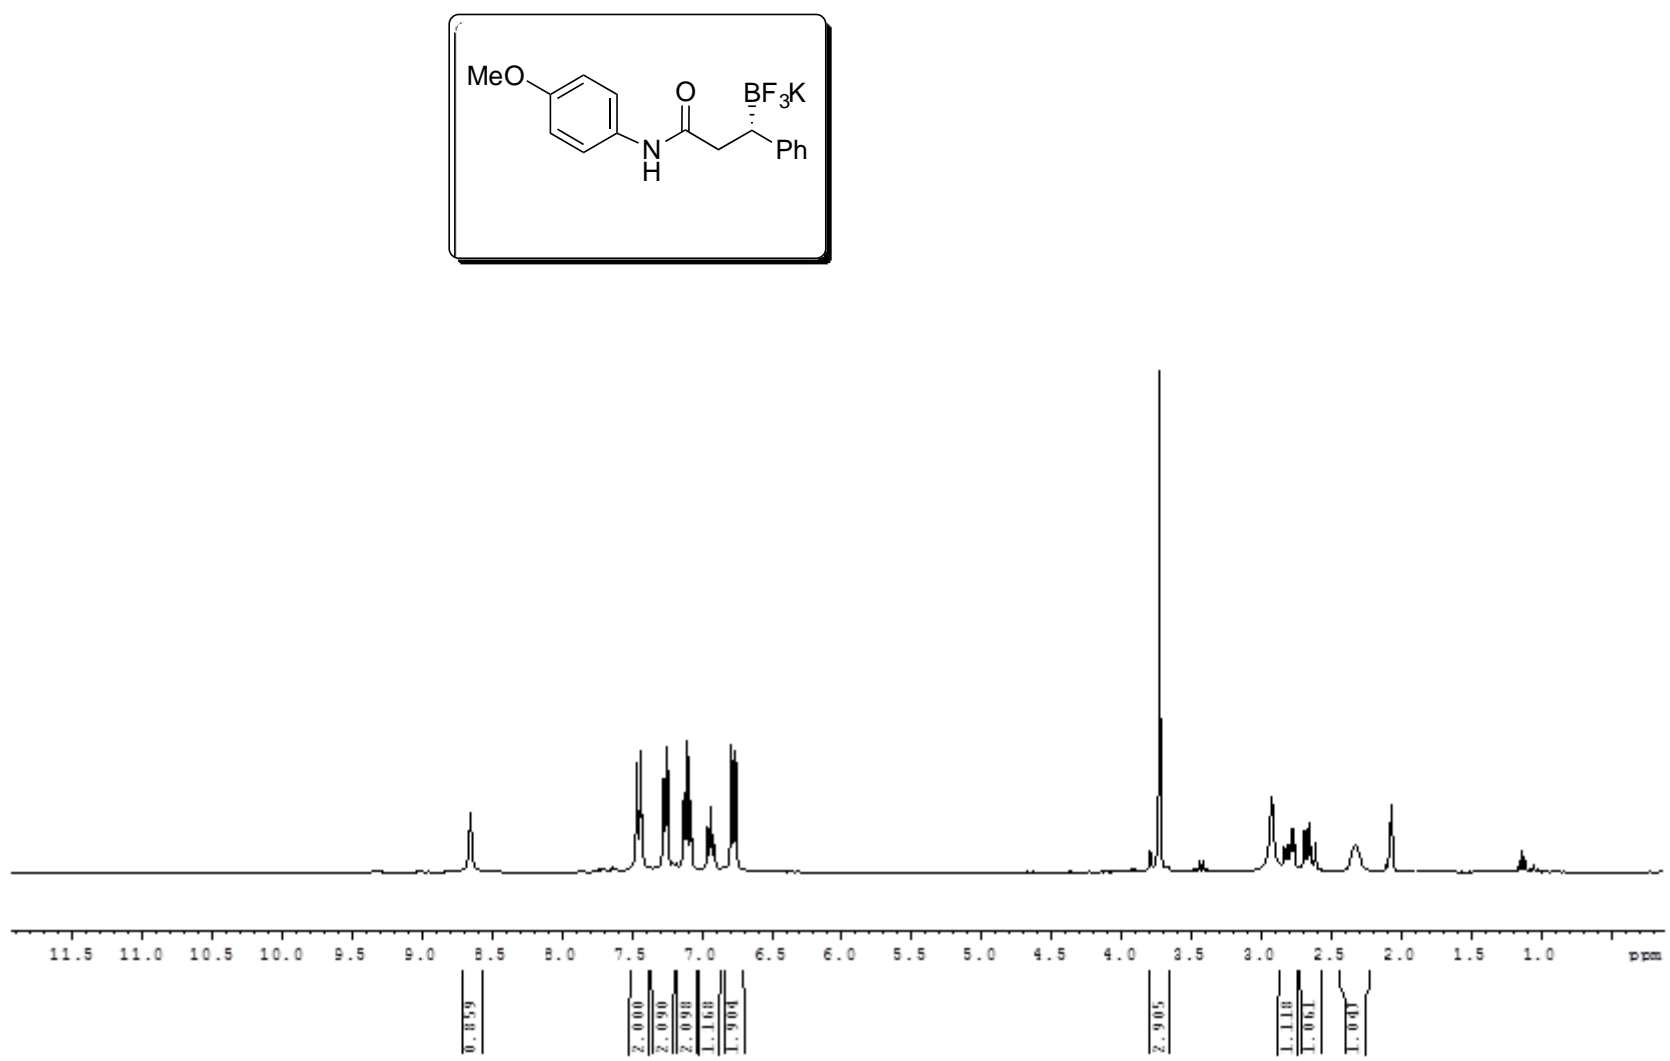

<sup>13</sup>C NMR (Acetone, 75.4 MHz) spectrum of potassium (S)-N-(4-methoxyphenyl)-3-phenyl-3-(trifluoroborato)propanamide (2i)

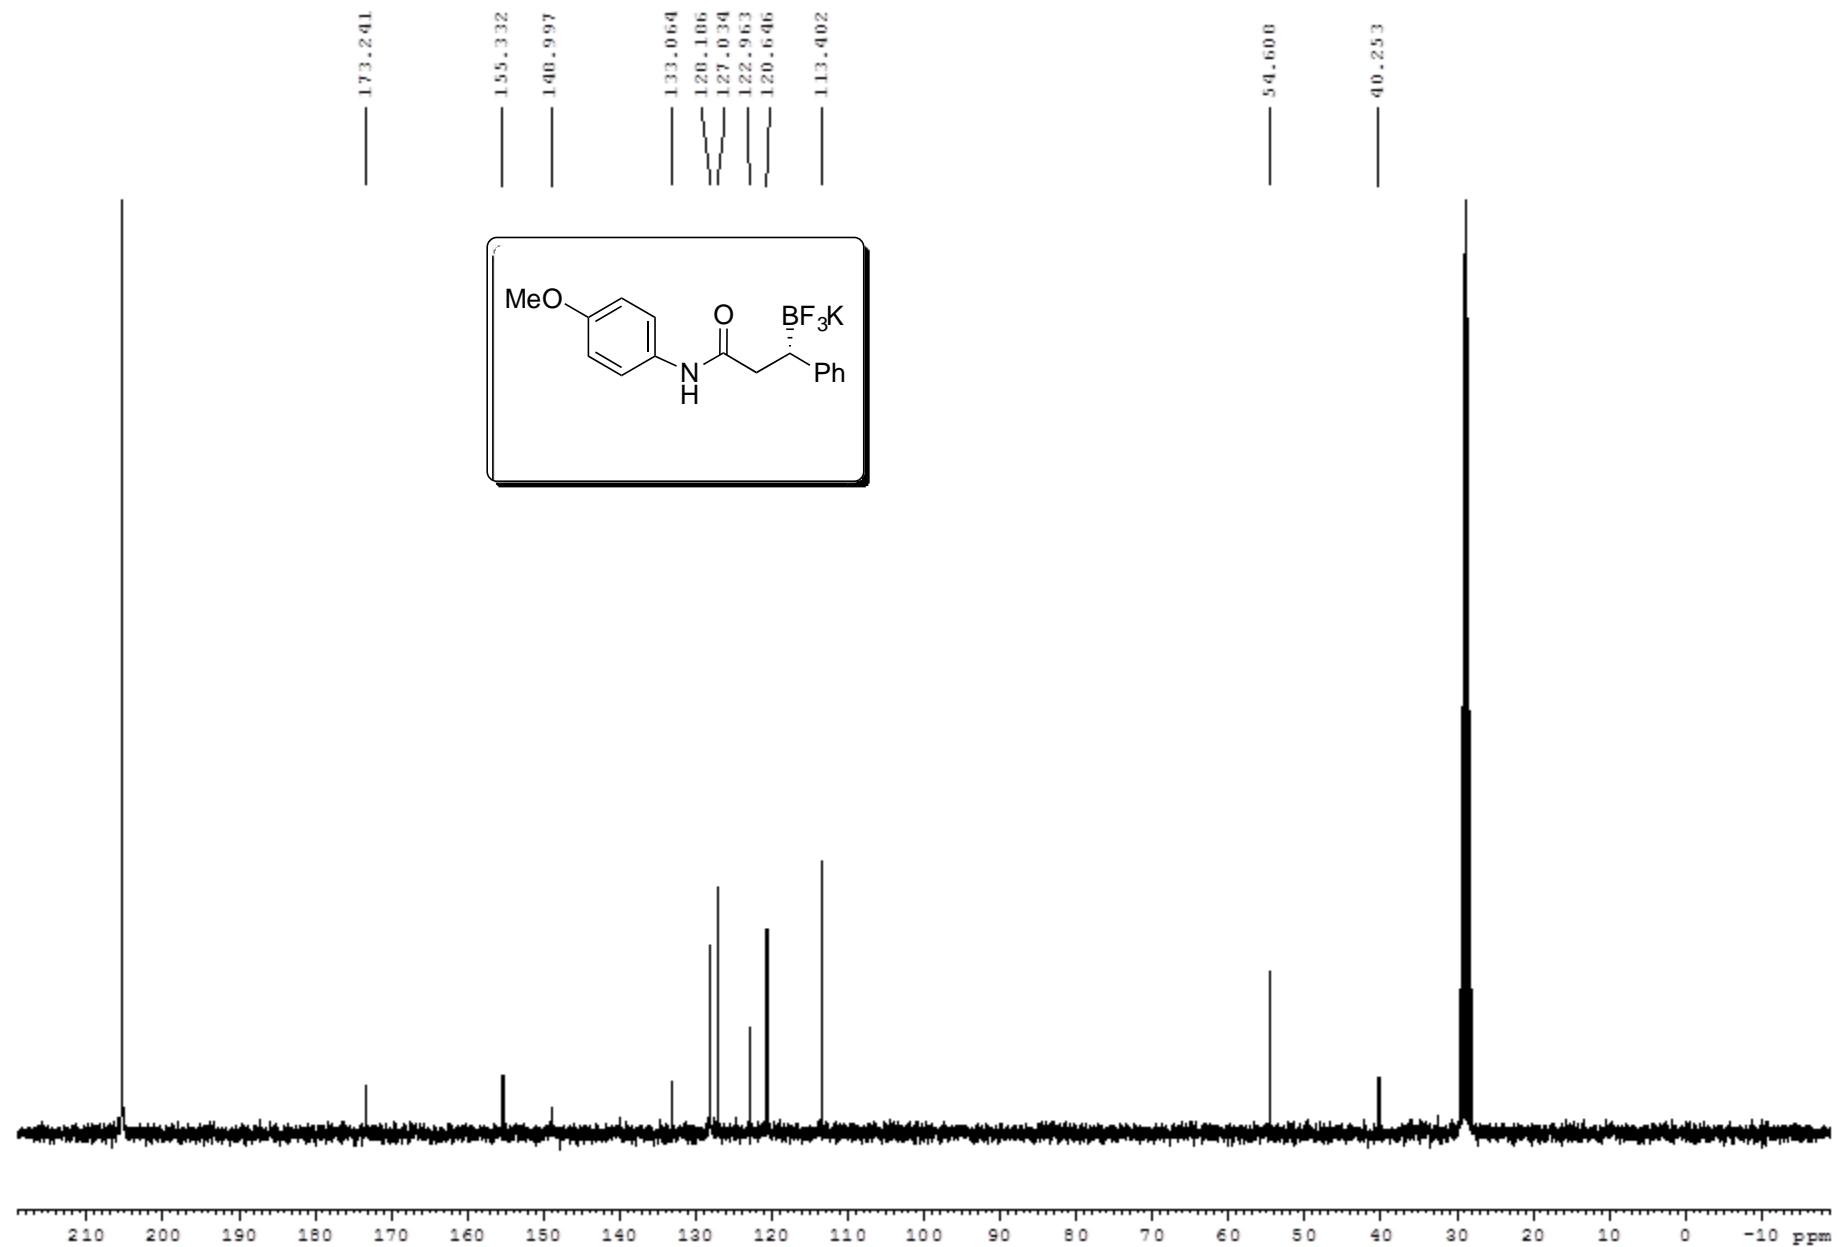



<sup>19</sup>F NMR (DMSO, 282.4 MHz) spectrum of potassium (S)-N-(4-methoxyphenyl)-3-phenyl-3-(trifluoroborato)propanamide (2i)

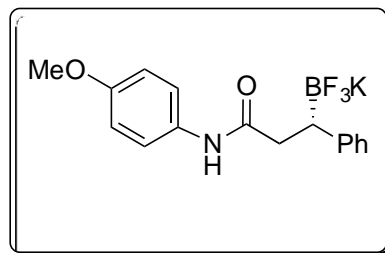

-144.726

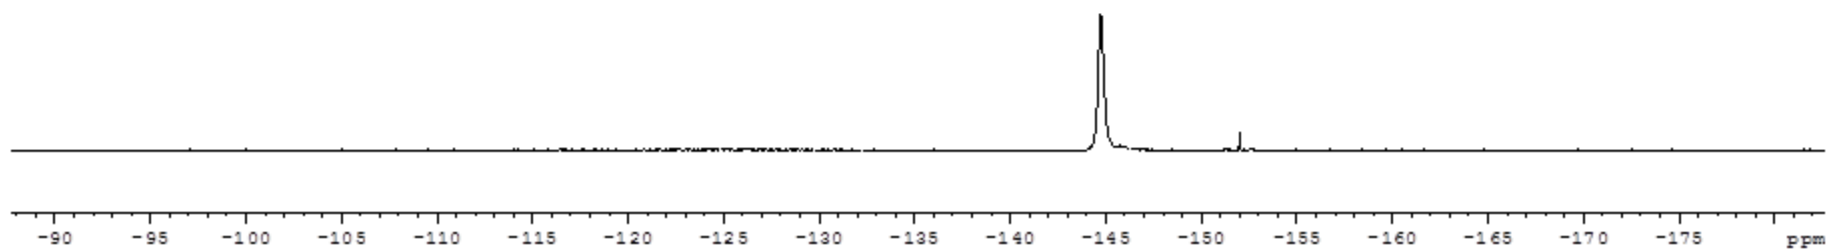

$^{11}\text{B}$  NMR (DMSO, 128.4 MHz) spectrum of potassium (*S*)-*N*-(4-methoxyphenyl)-3-phenyl-3-(trifluoroborato)propanamide (2i)

5.600

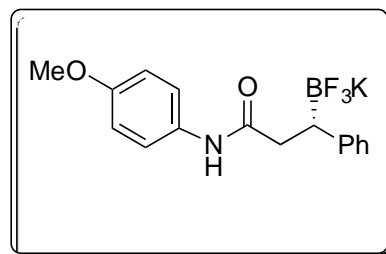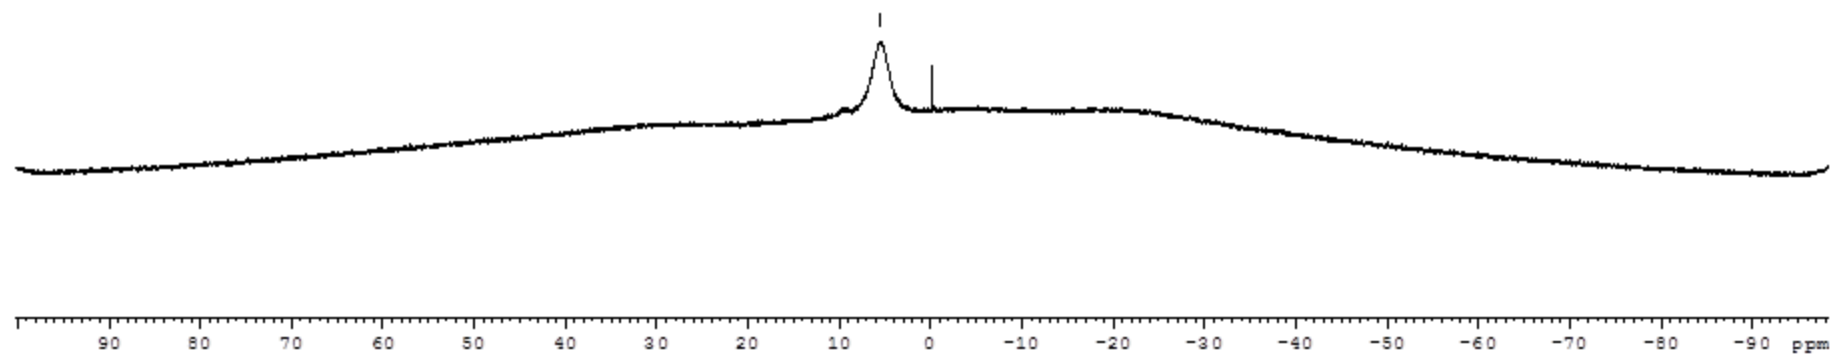

<sup>1</sup>H NMR (DMSO, 300 MHz) spectrum of potassium *N*-ethyl-*N*-(*o*-tolyl)-3-(trifluoroborato)butanamide (2j)

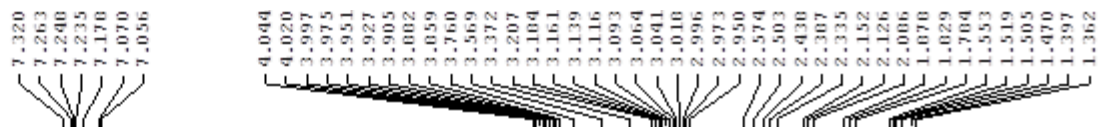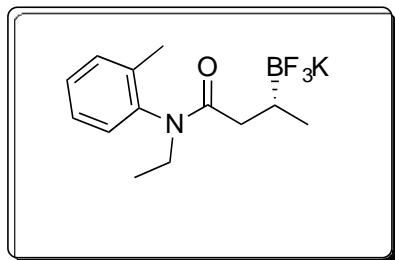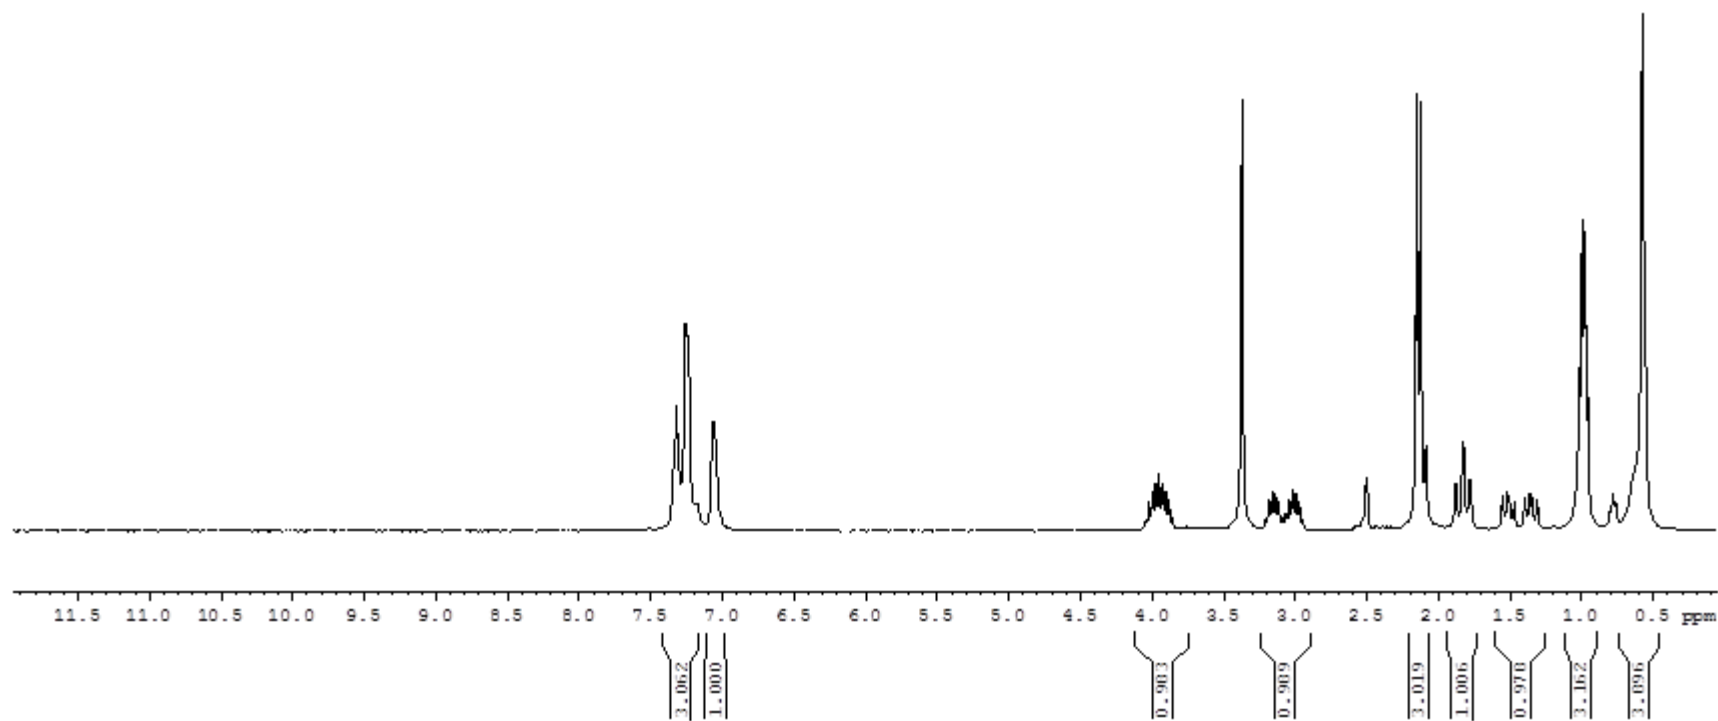

<sup>13</sup>C NMR (DMSO, 75.4 MHz) spectrum of potassium *N*-ethyl-*N*-(*o*-tolyl)-3-(trifluoroborato)butanamide (2j)

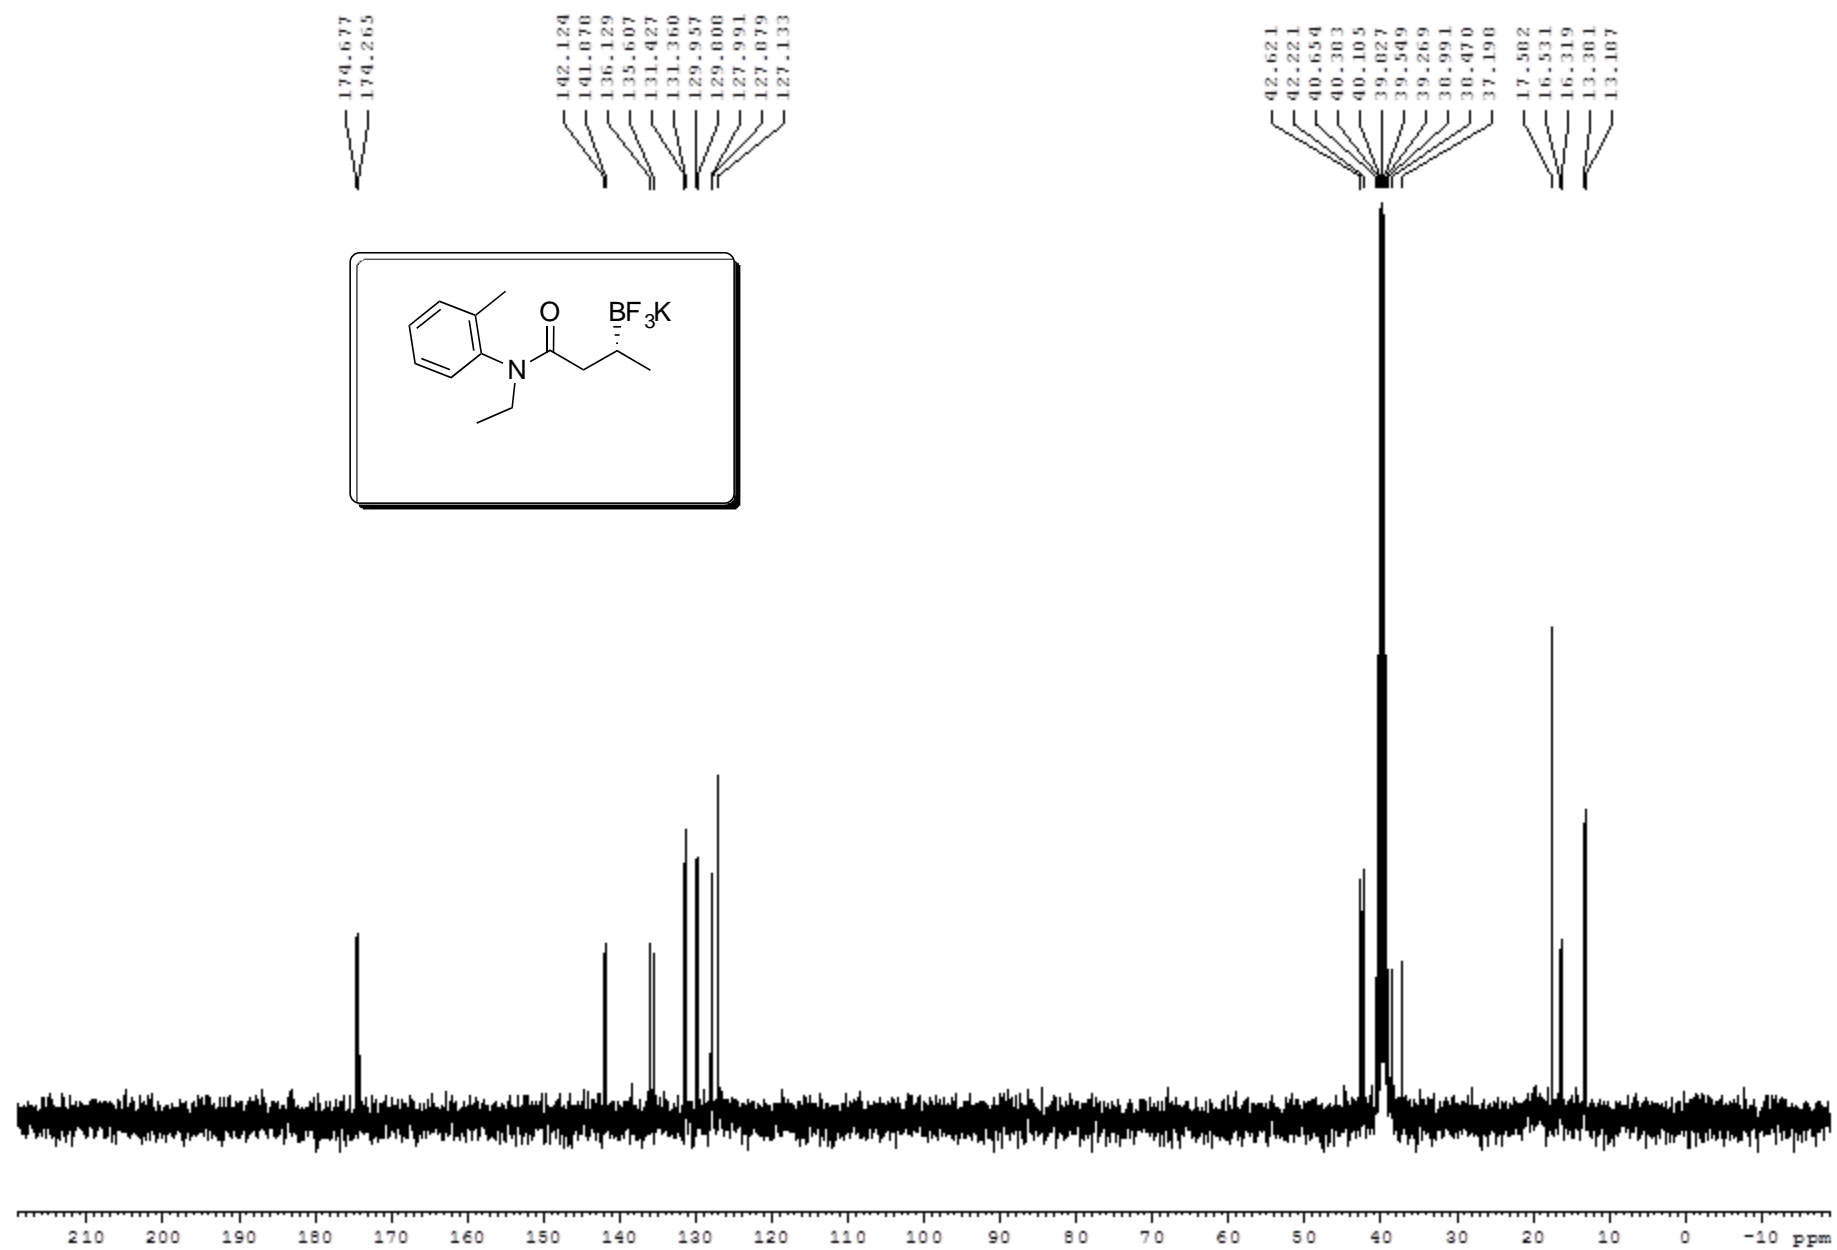

**<sup>19</sup>F NMR (DMSO, 470.8 MHz) spectrum of potassium *N*-ethyl-*N*-(*o*-tolyl)-3-(trifluoroborato)butanamide (2j)**

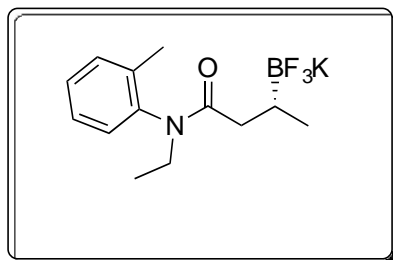

-147.696

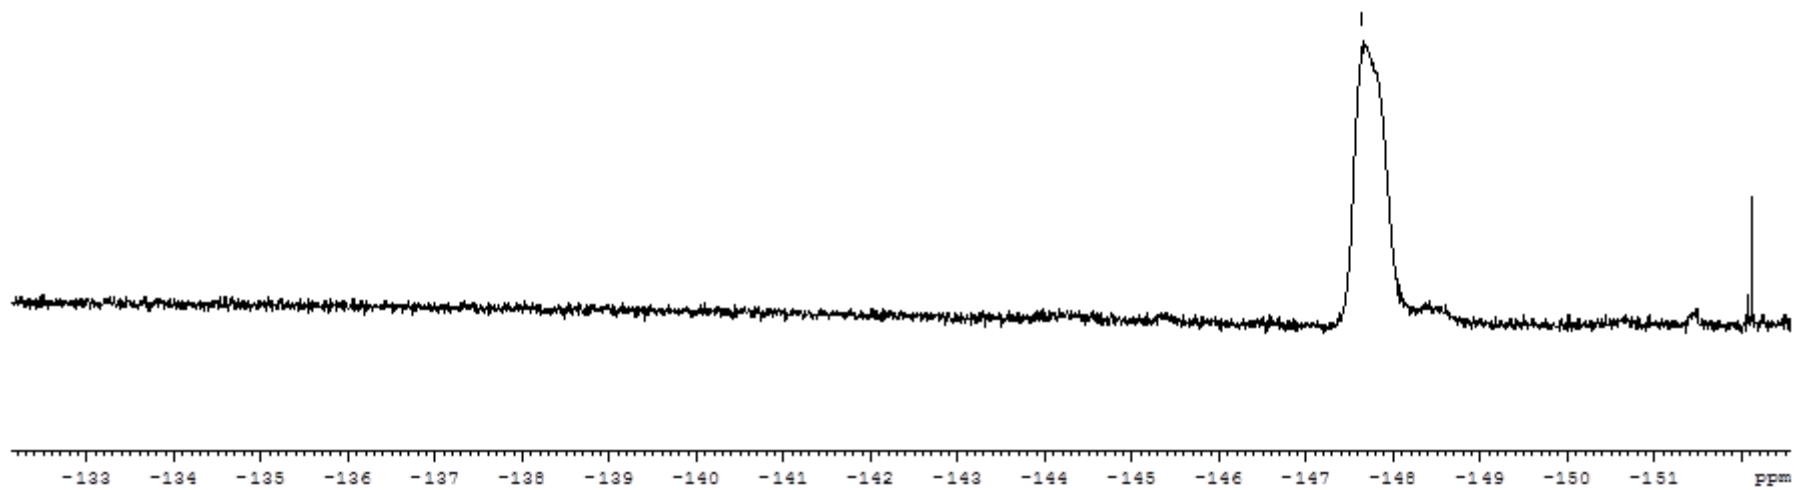

**$^{11}\text{B}$  NMR (DMSO, 128.4 MHz) spectrum of potassium *N*-ethyl-*N*-(*o*-tolyl)-3-(trifluoroborato)butanamide (2j)**

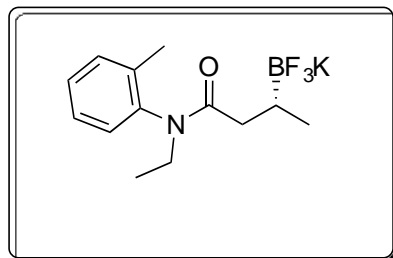

4.981

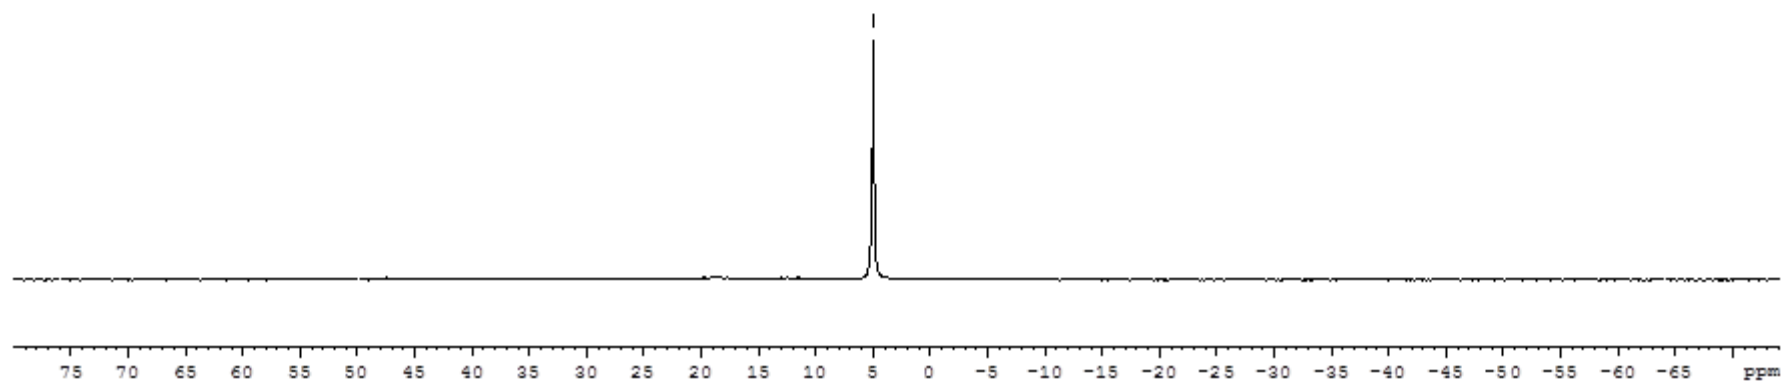

<sup>1</sup>H NMR (Acetone, 500 MHz) spectrum of potassium (*R*)-*N,N*-dimethyl-3-(trifluoroborato)butanamide (2k)

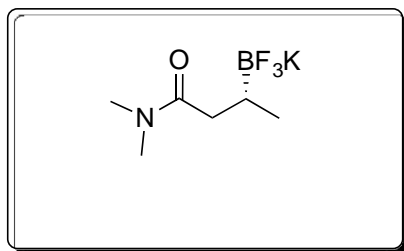

3.519  
2.996  
2.635  
2.270  
2.047  
0.700

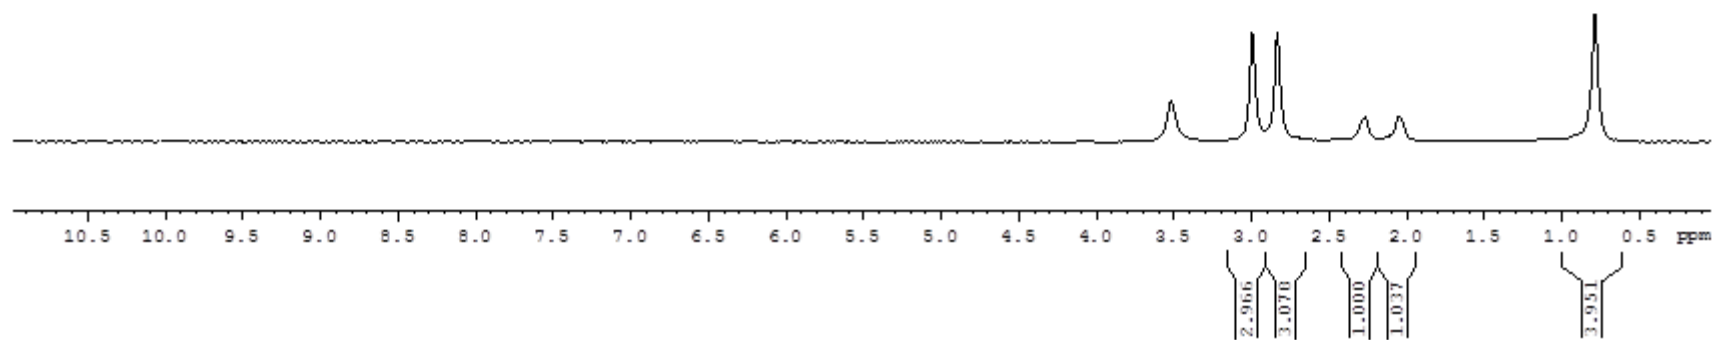

<sup>13</sup>C NMR (Acetone, 125.8 MHz) spectrum of potassium (*R*)-*N,N*-dimethyl-3-(trifluoroborato)butanamide (2k)

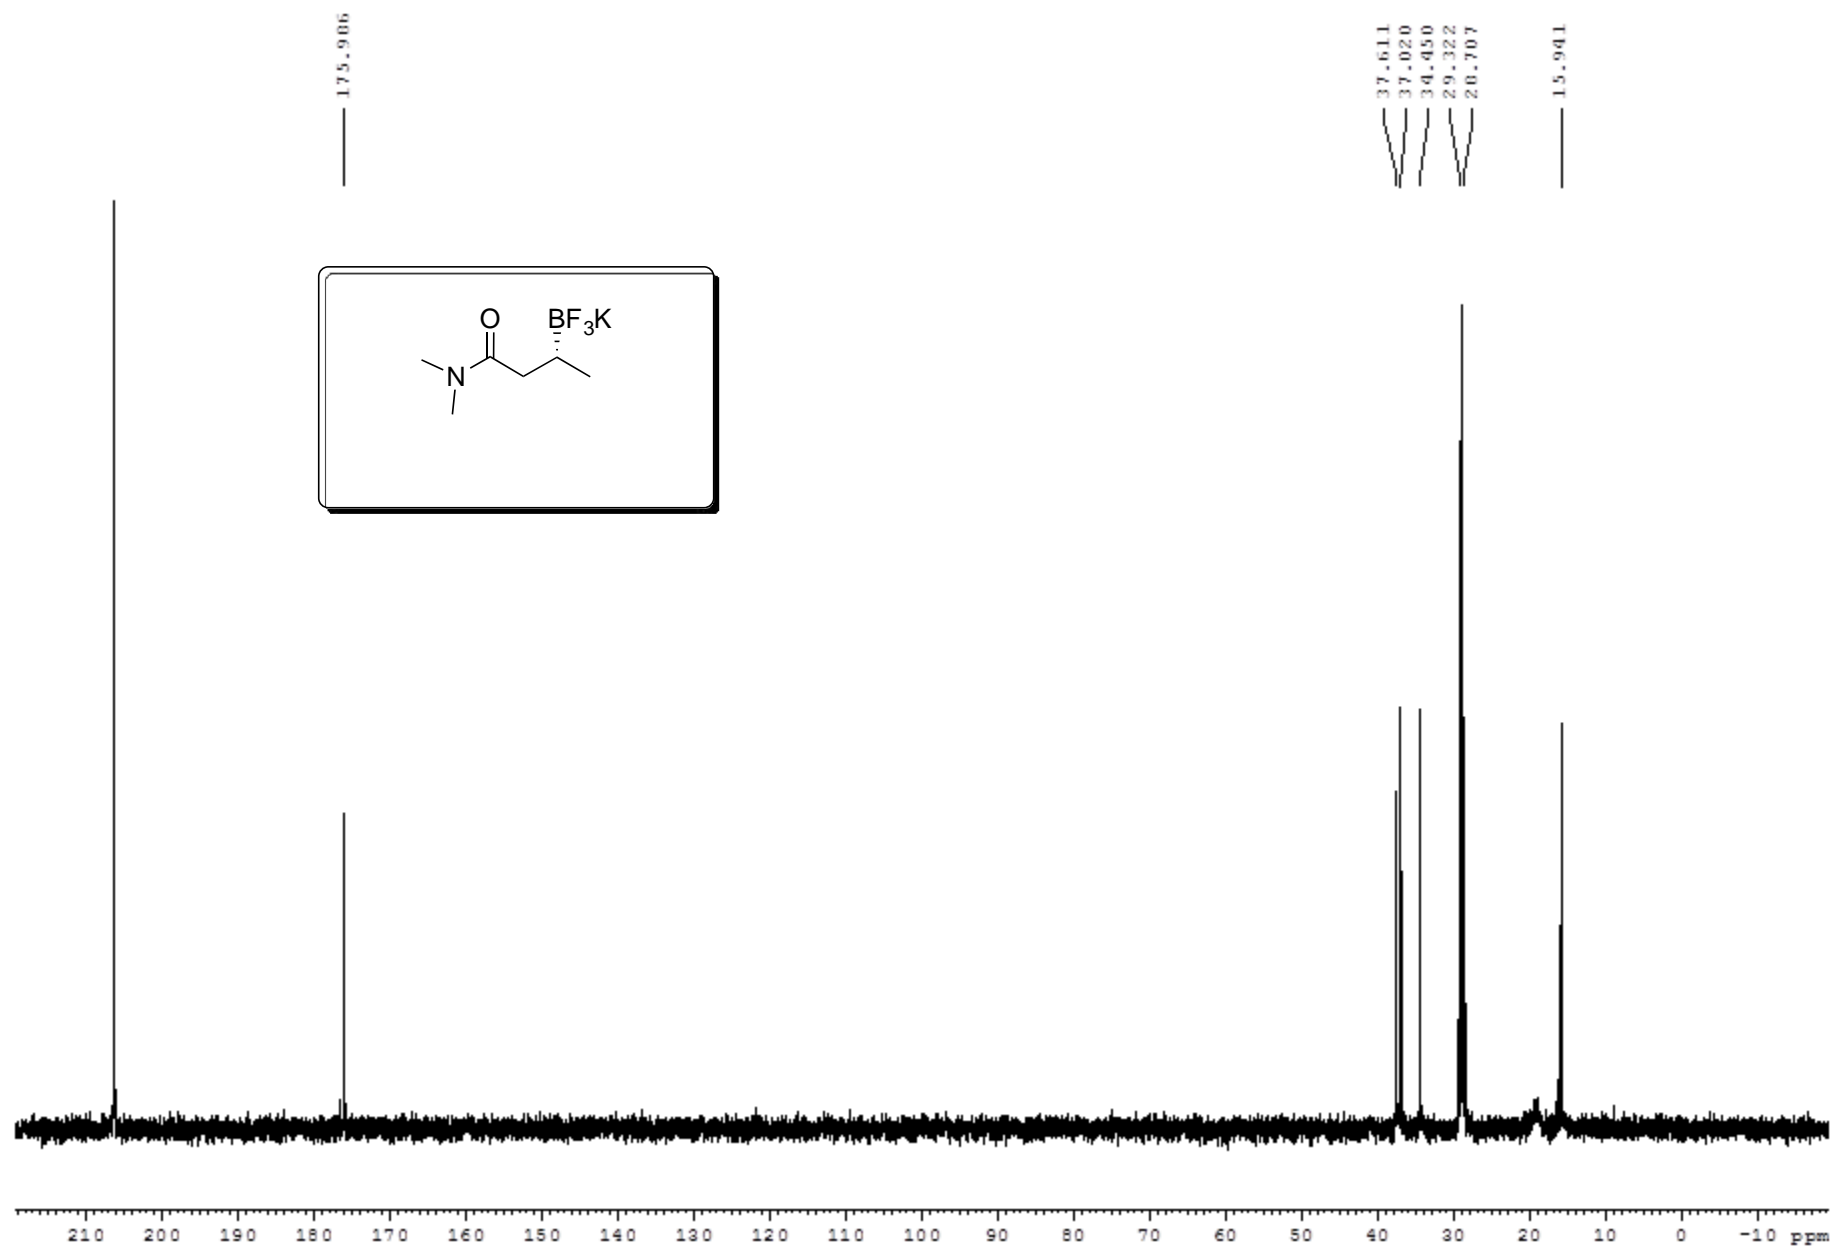



<sup>19</sup>F NMR (Acetone, 470.8 MHz) spectrum of Potassium (*R*)-*N,N*-dimethyl-3-(trifluoroborato)butanamide (2k)

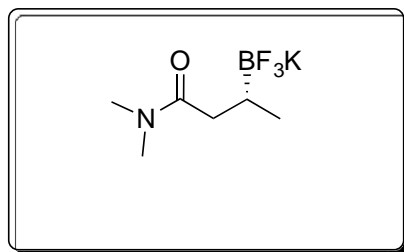

-147.335  
-147.379

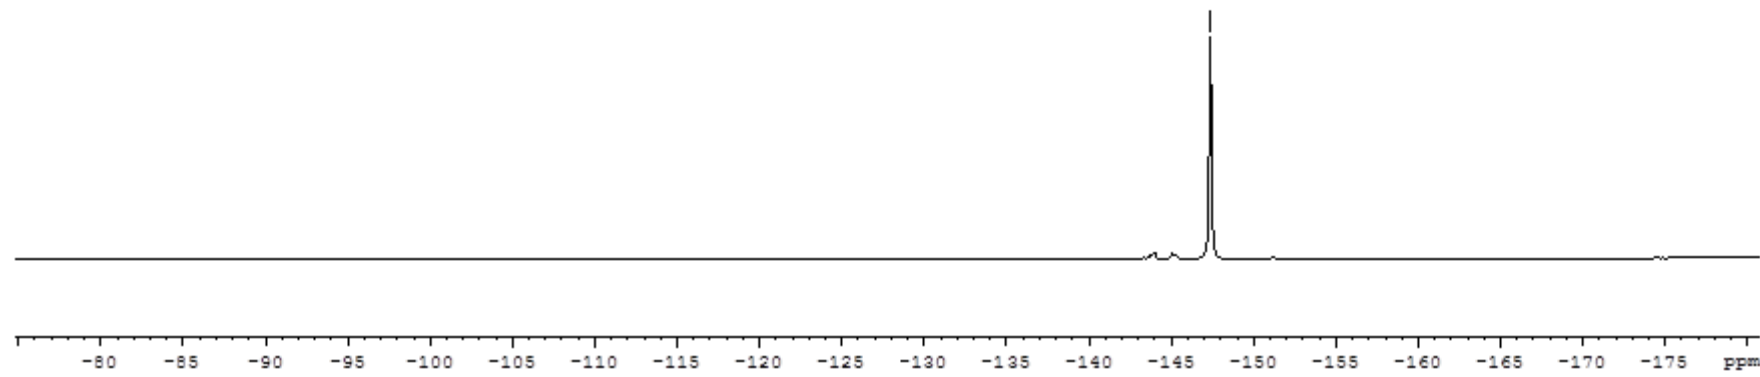

**$^{11}\text{B}$  NMR (Acetone, 128.4 MHz) spectrum of Potassium (*R*)-*N,N*-dimethyl-3-(trifluoroborato)butanamide (2k)**

5.424

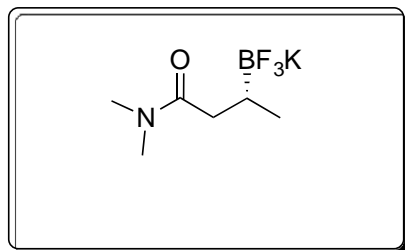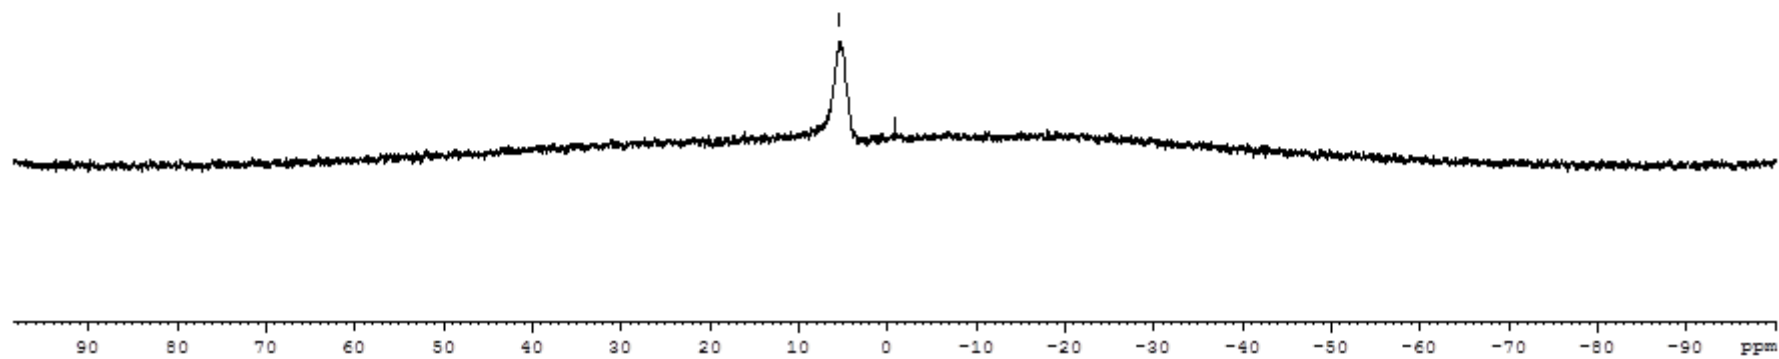

<sup>1</sup>H NMR (DMSO, 360 MHz) spectrum of potassium (*R*)-*N,N*-dibenzyl-3-(trifluoroborato)butanamide (2l)

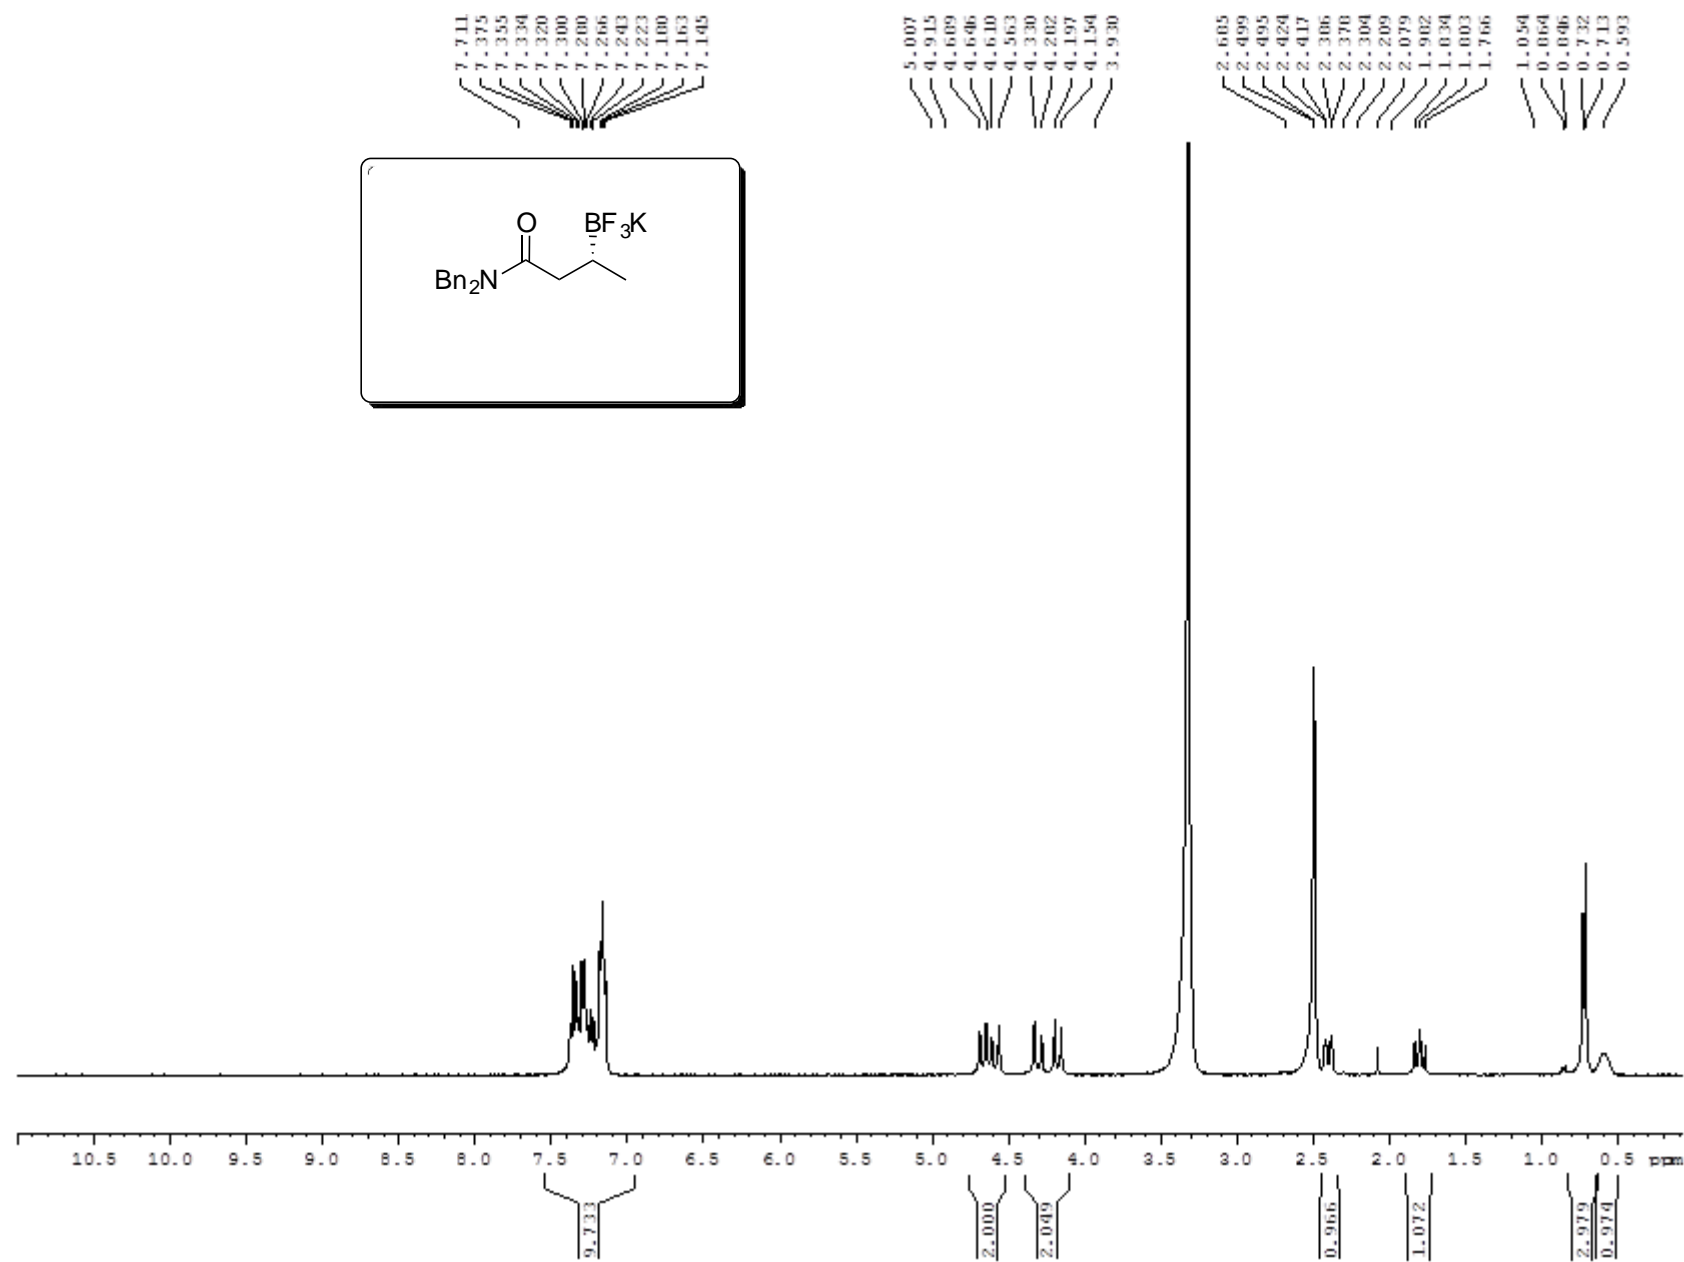

<sup>13</sup>C NMR (DMSO, 90.5 MHz) spectrum of potassium (*R*)-*N,N*-dibenzyl-3-(trifluoroborato)butanamide (2l)

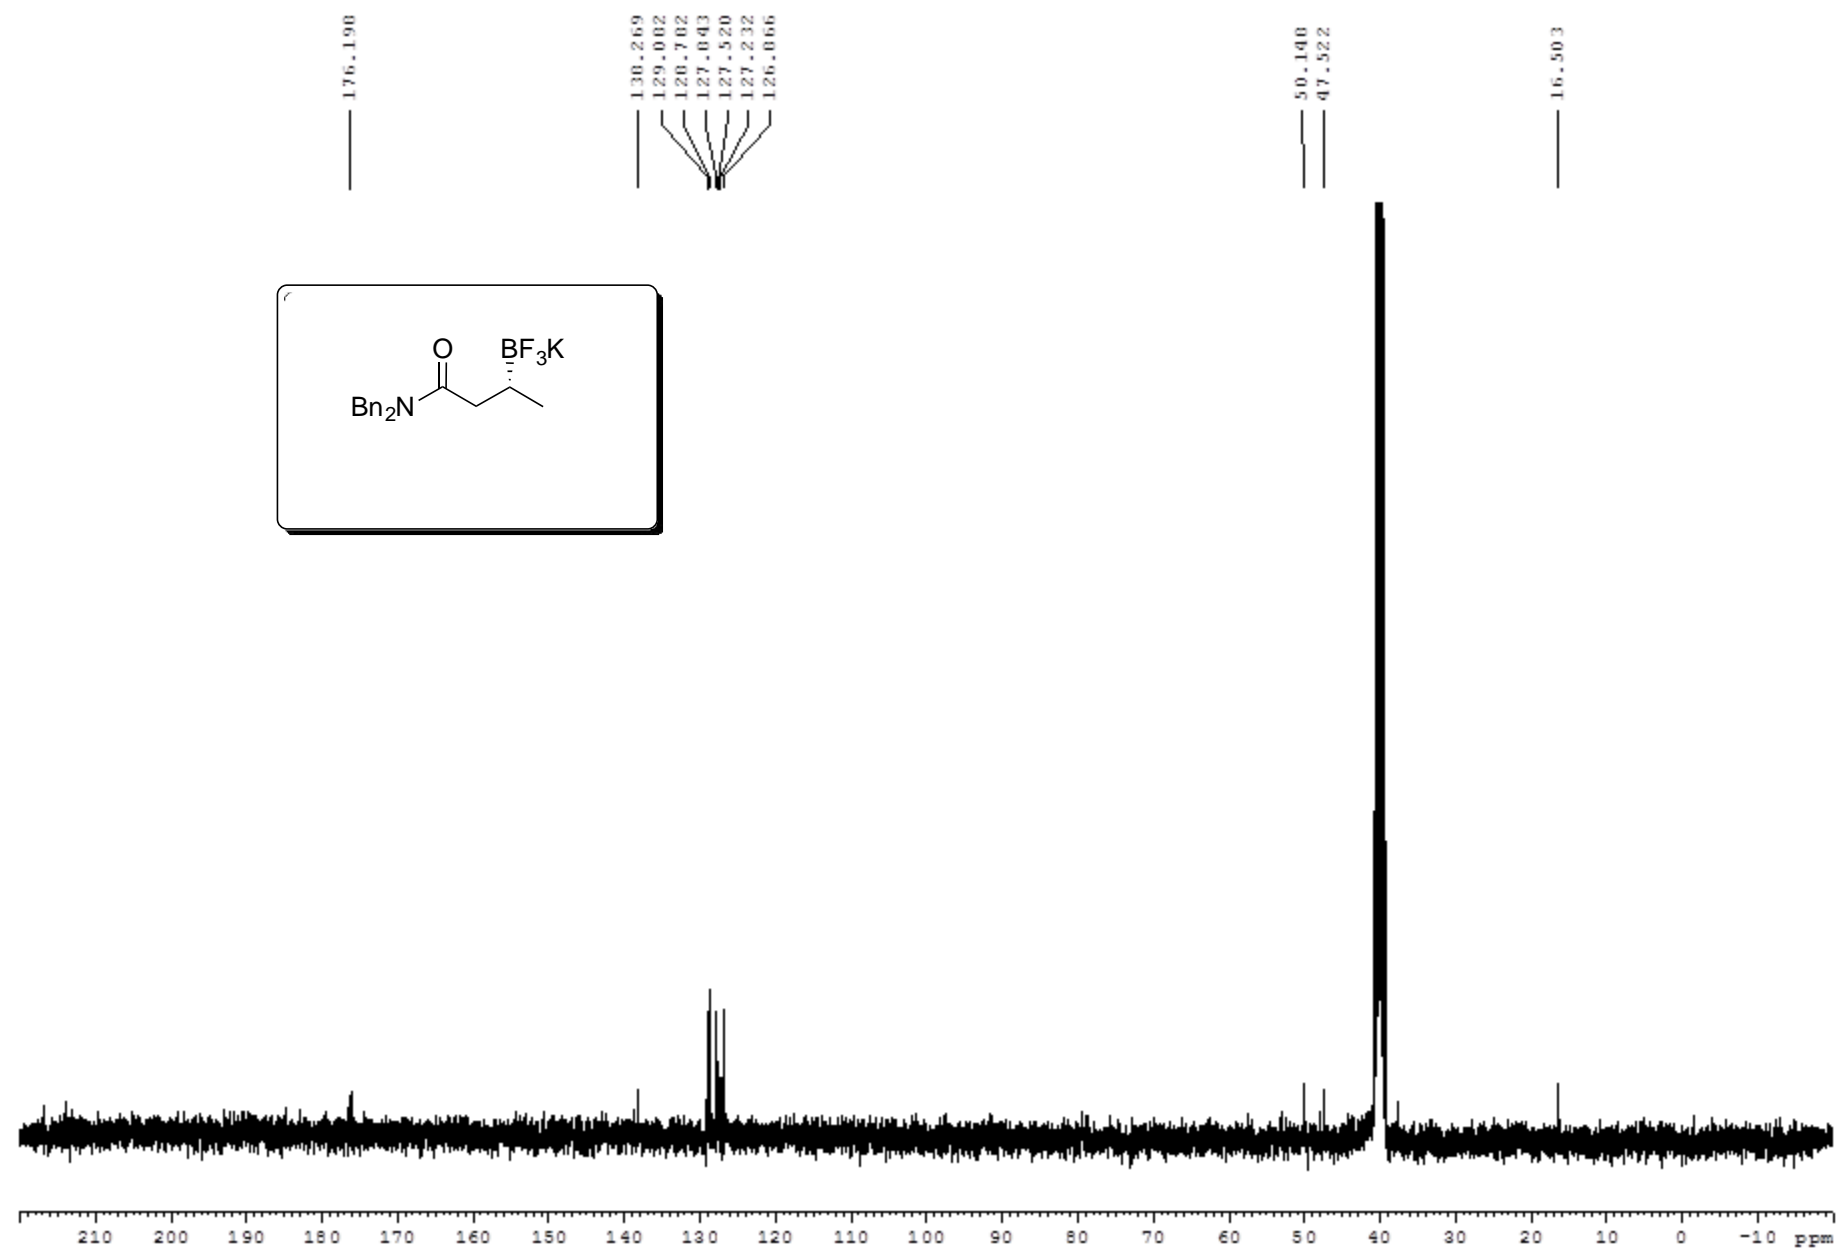

<sup>19</sup>F NMR (Acetone, 338.8 MHz) spectrum of potassium (*R*)-*N,N*-dibenzyl-3-(trifluoroborato)butanamide (21)

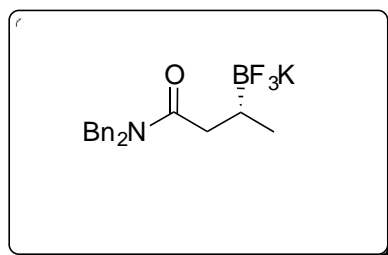

-147.940  
-148.156  
-148.195  
-148.351  
-148.433  
-148.638  
-148.702

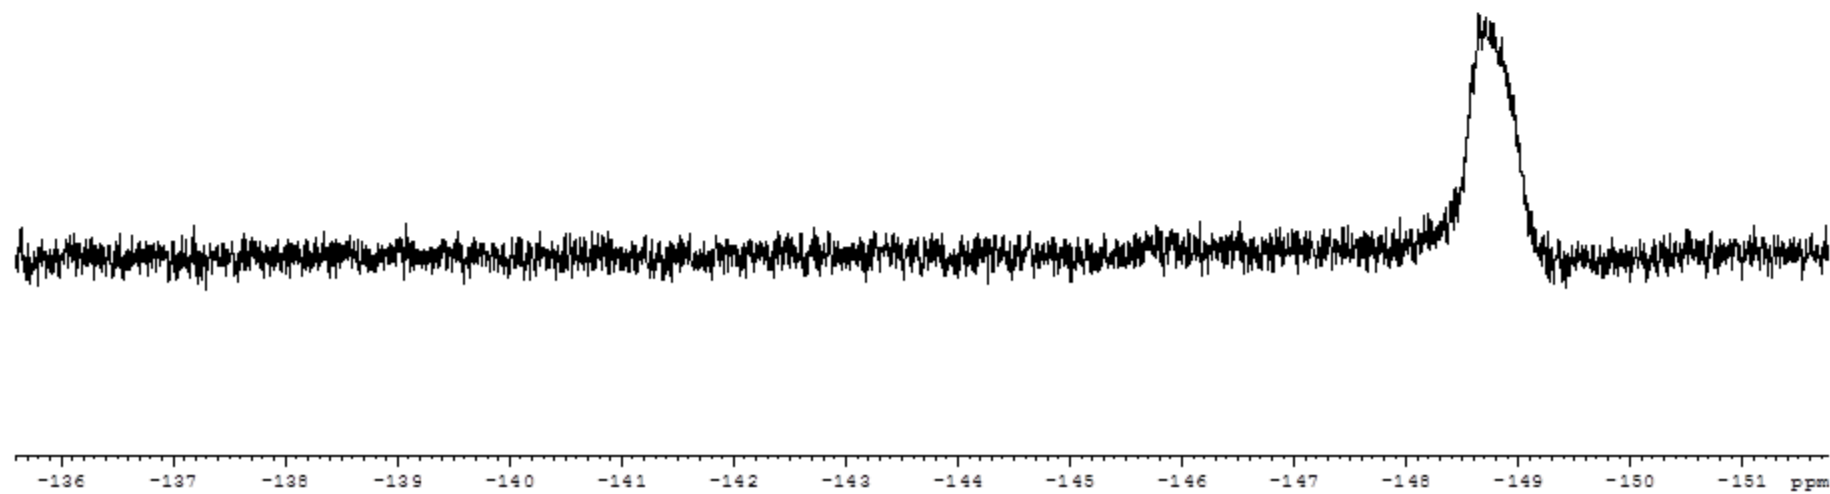

**$^{11}\text{B}$  NMR (Acetone, 128.4 MHz) spectrum of potassium (*R*)-*N,N*-dibenzyl-3-(trifluoroborato)butanamide (2l)**

5.025  
5.005

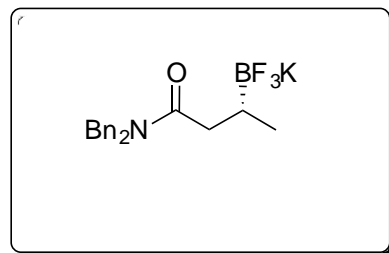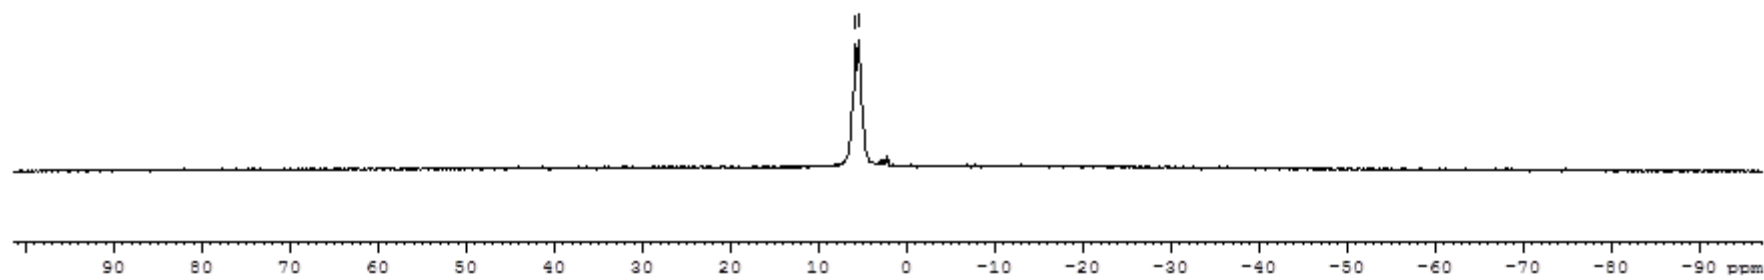

<sup>1</sup>H NMR (DMSO, 500 MHz) spectrum of potassium (S)-N-cyclohexyl-3-phenyl-3-(trifluoroborato)propanamide (2m)

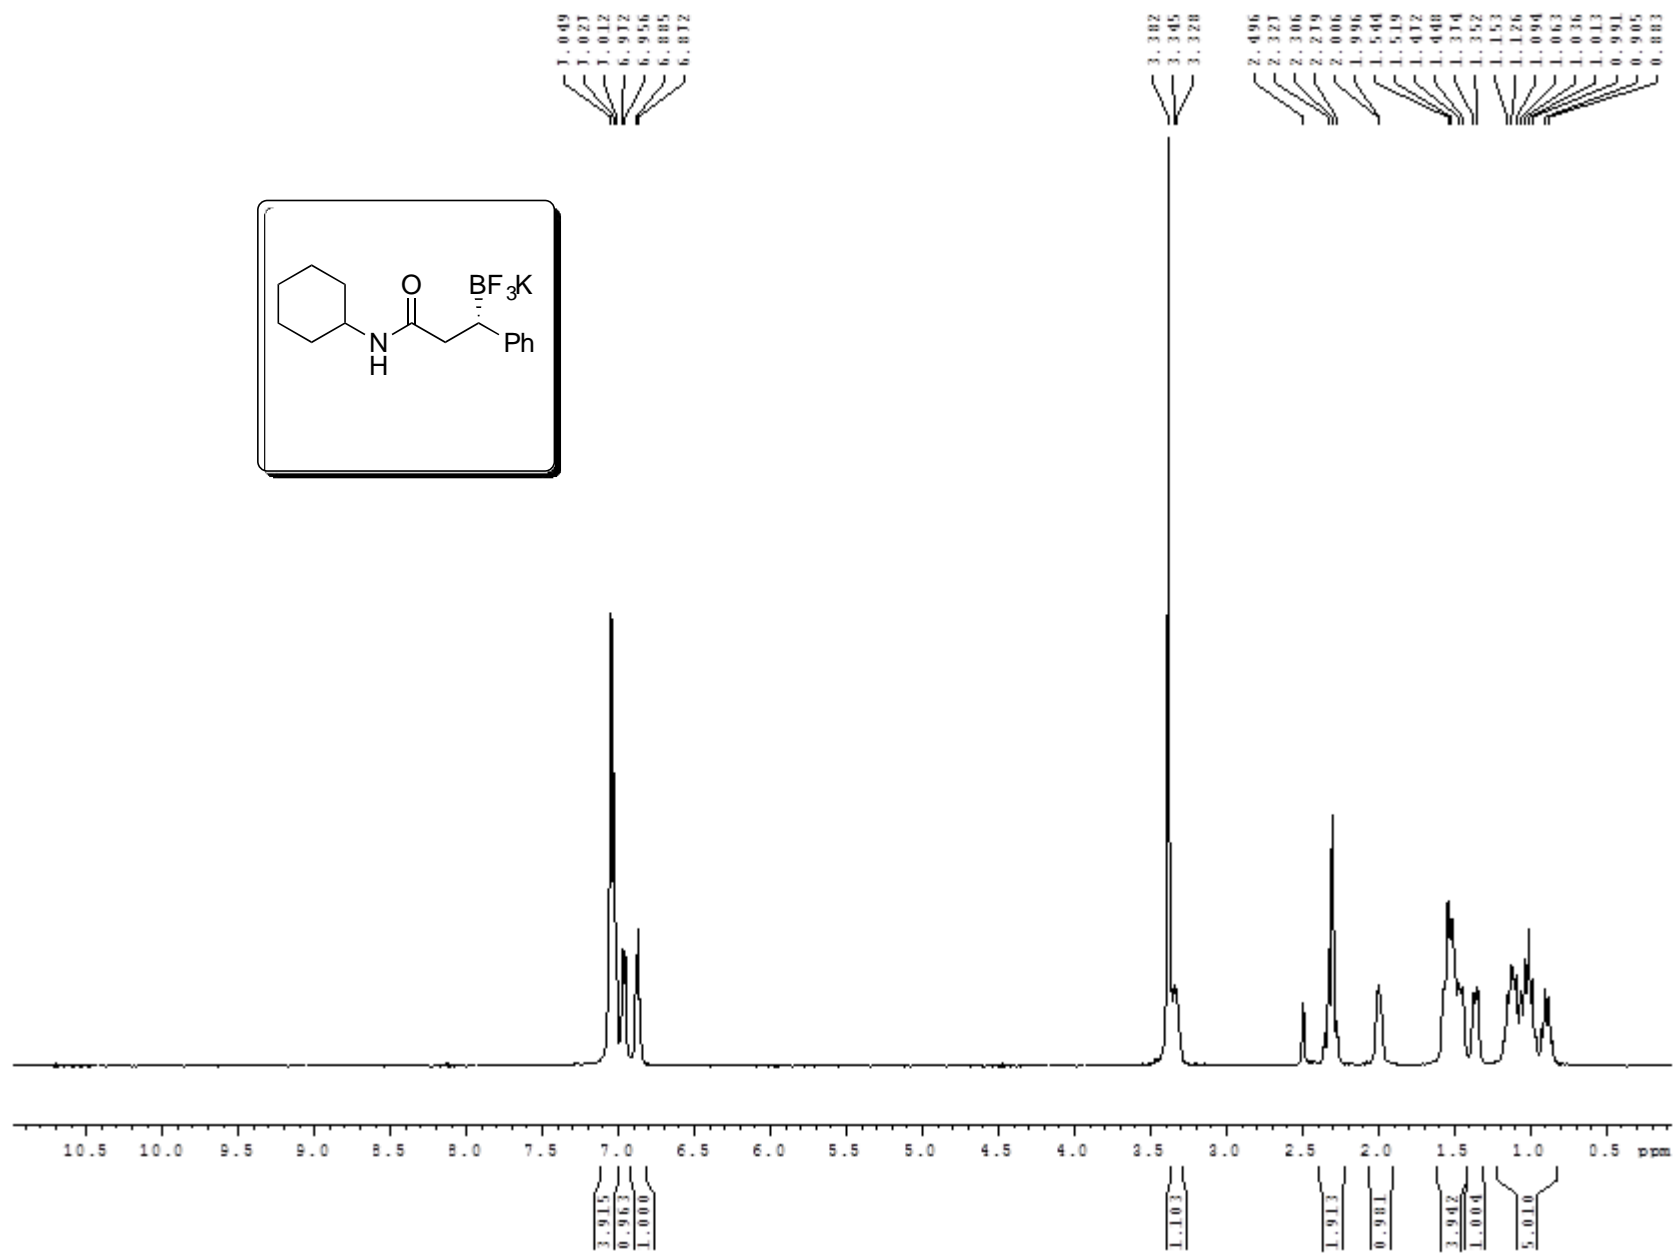

<sup>13</sup>C NMR (DMSO, 125.8 MHz) spectrum of potassium (*S*)-*N*-cyclohexyl-3-phenyl-3-(trifluoroborato)propanamide (2m)

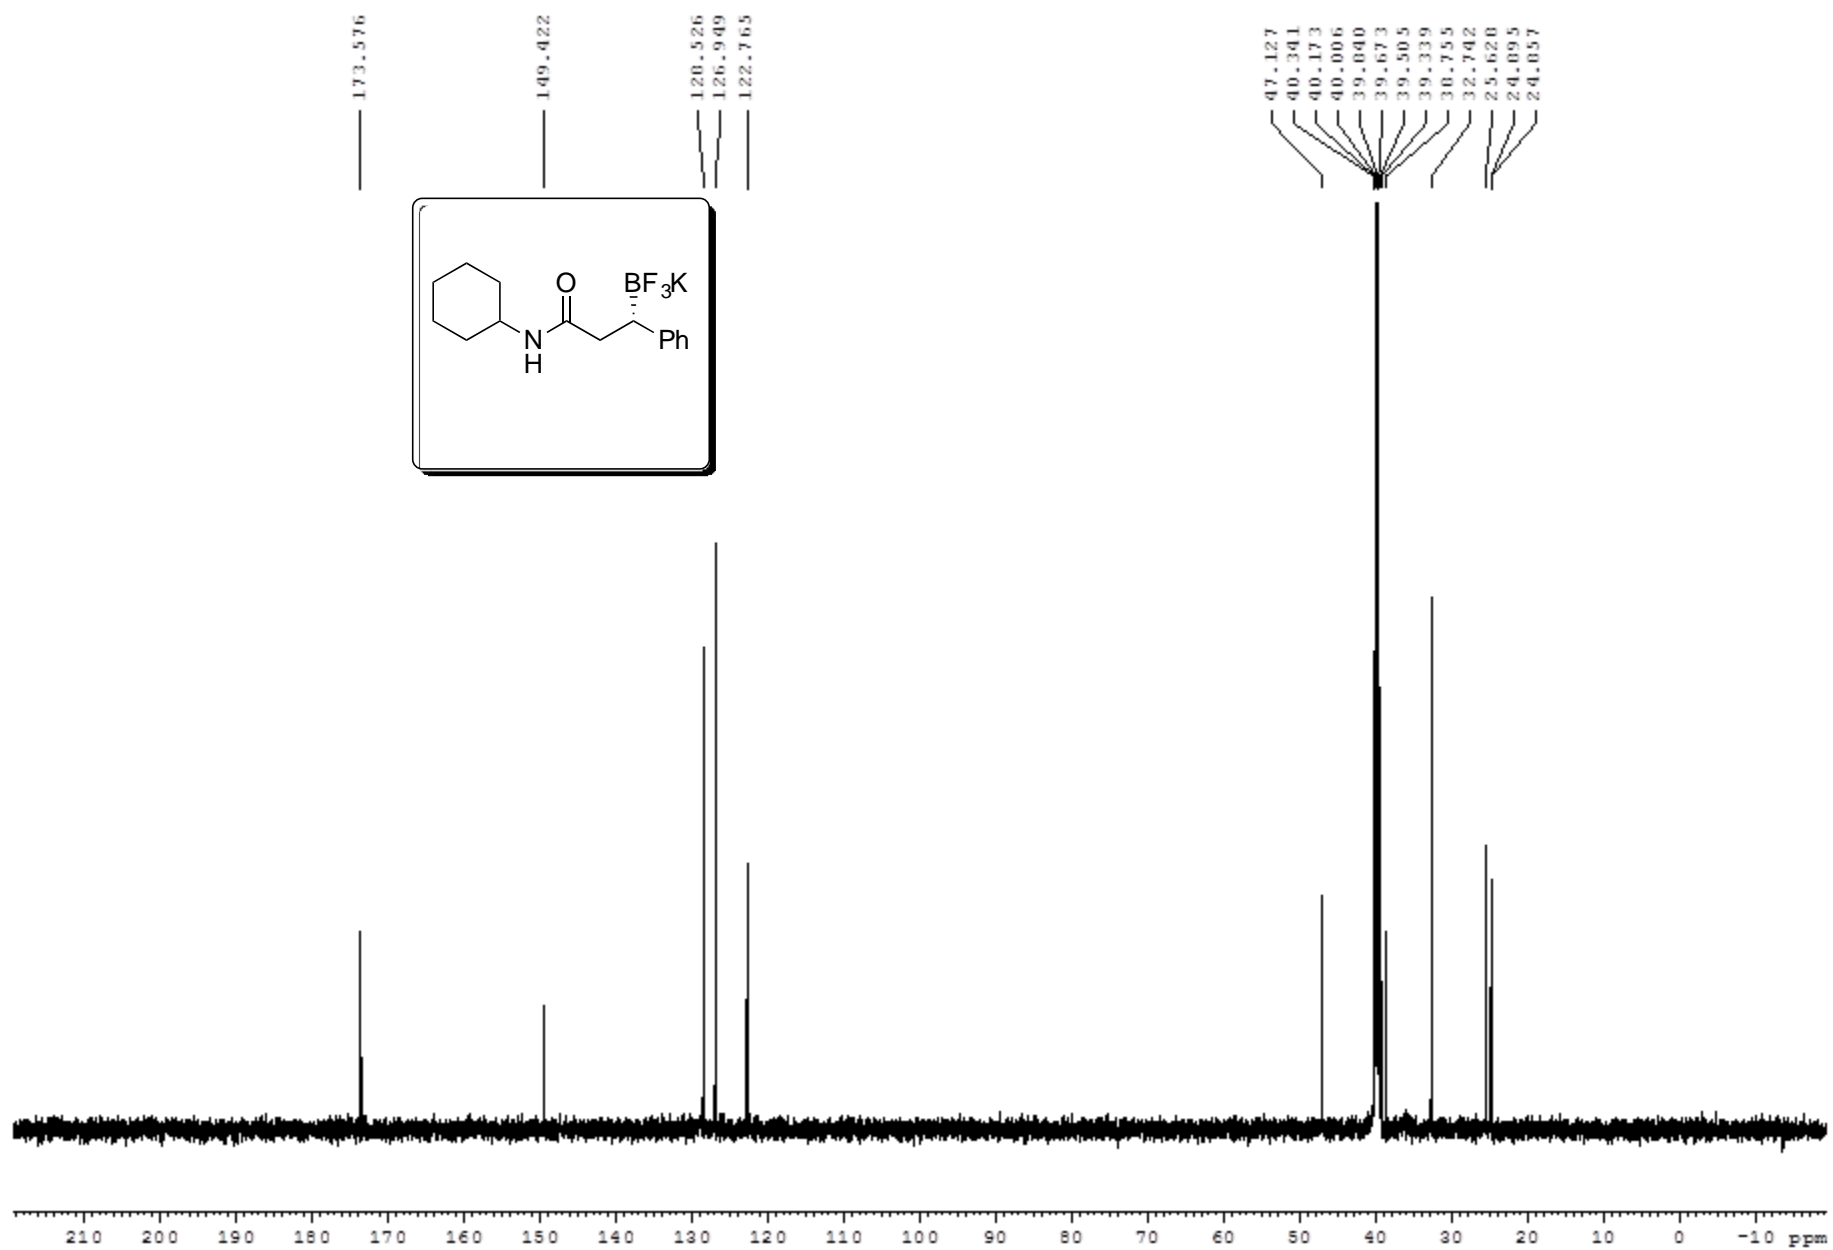



<sup>19</sup>F NMR (DMSO, 470.8 MHz) spectrum of potassium (S)-N-cyclohexyl-3-phenyl-3-(trifluoroborato)propanamide (2m)

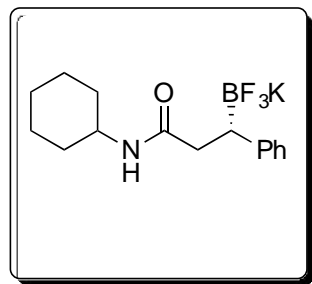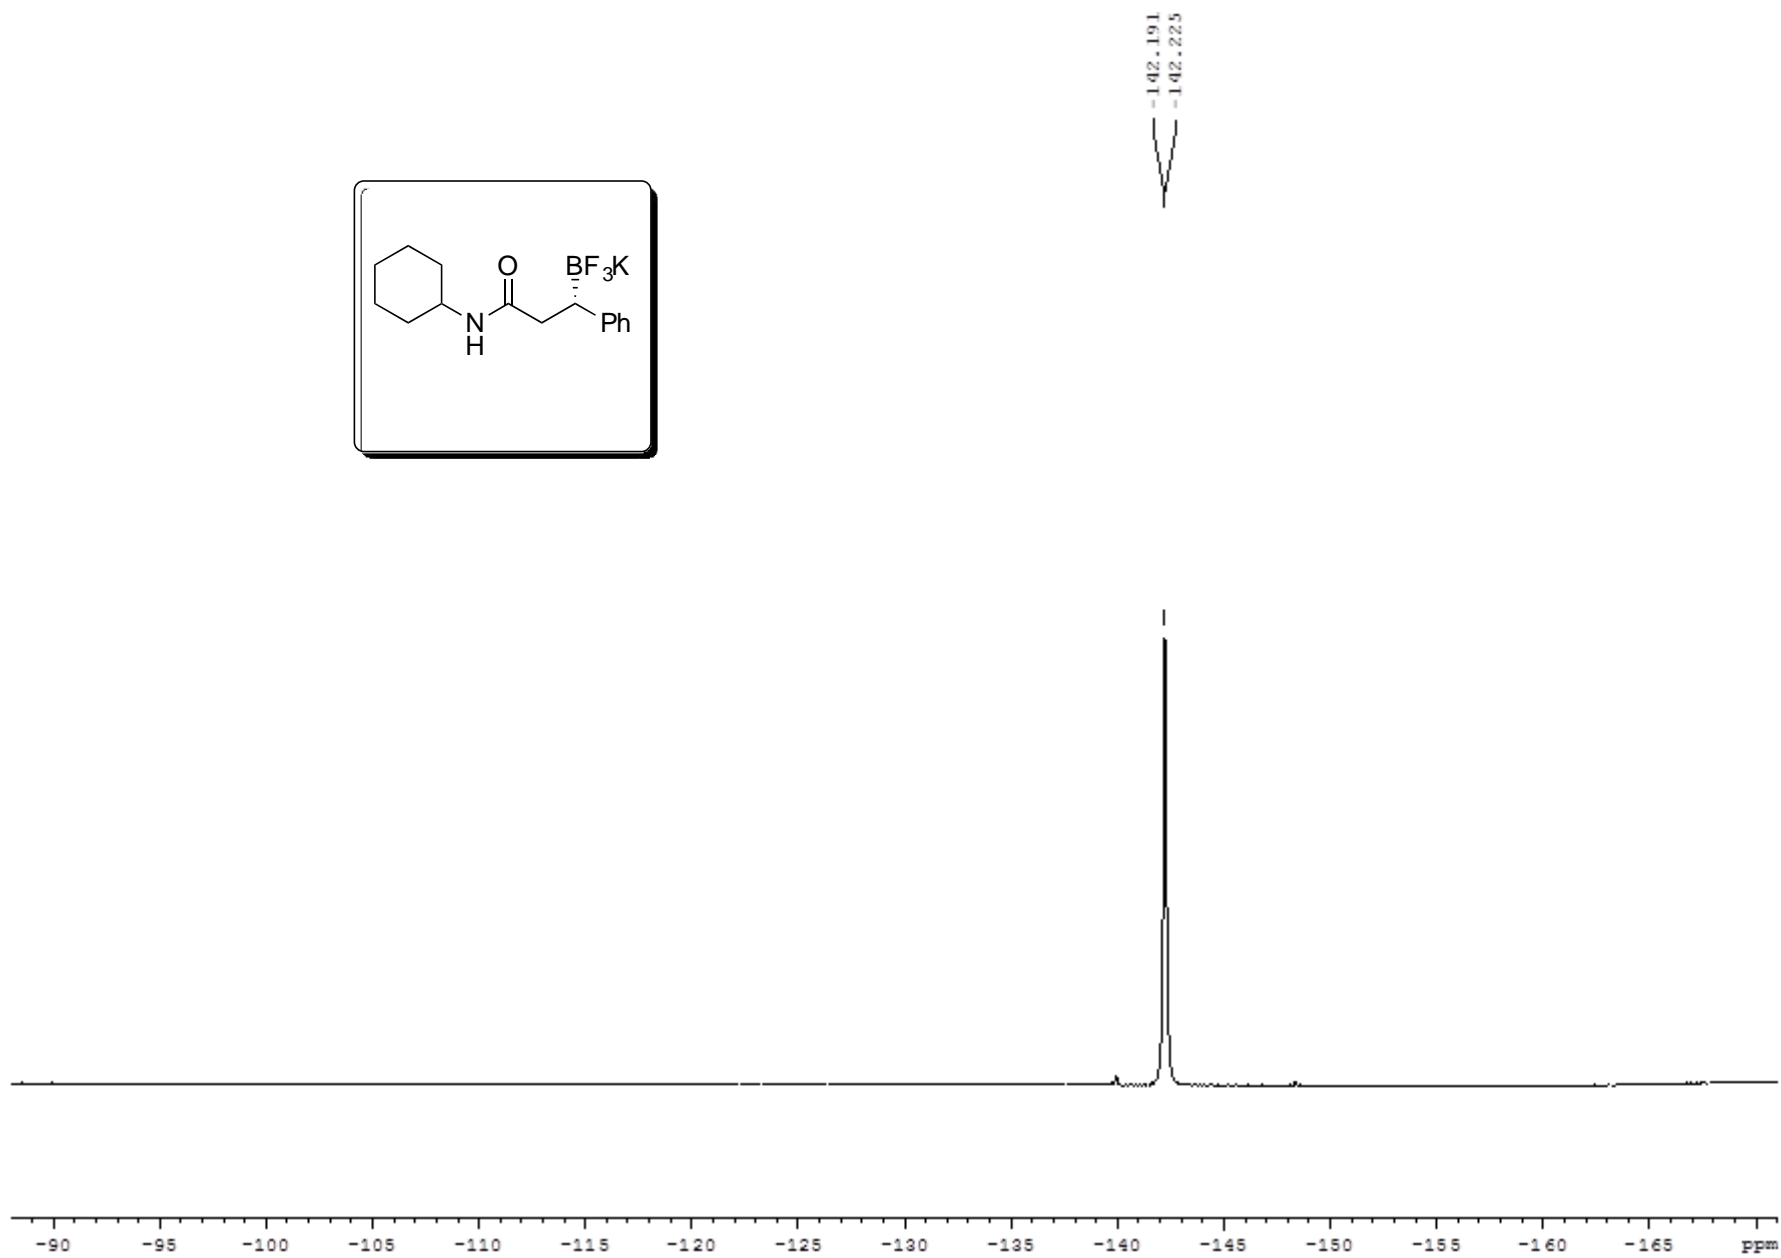

**$^{11}\text{B}$  NMR (DMSO, 128.4 MHz) spectrum of potassium (*S*)-*N*-cyclohexyl-3-phenyl-3-(trifluoroborato)propanamide (2m)**

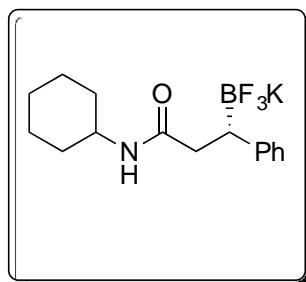

5.601  
5.221

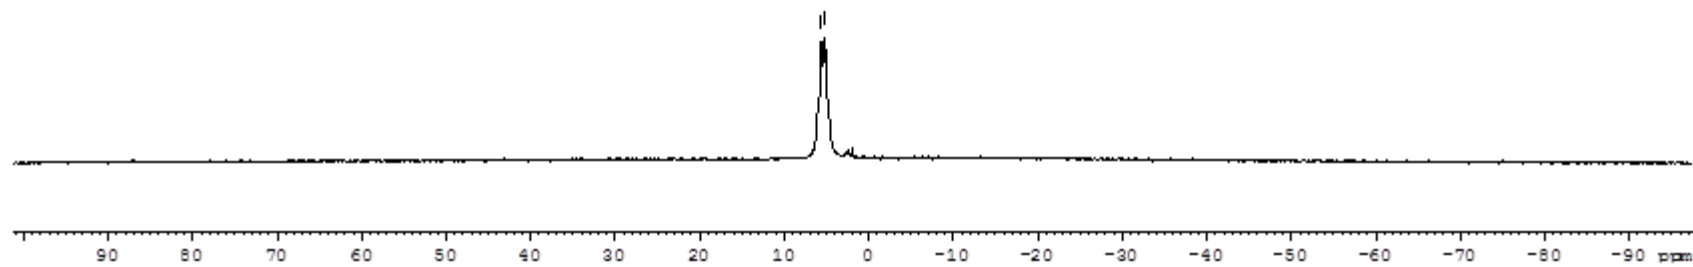

S138

<sup>1</sup>H NMR (Acetone, 500 MHz) spectrum of potassium 3-phenyl-1-(pyrrolidin-1-yl)-3-(trifluoroborato)propan-1-one (2n)

7.202  
7.077  
6.925

3.391  
3.264  
2.077  
2.630  
2.452  
2.212  
2.046  
1.706  
1.720  
1.107

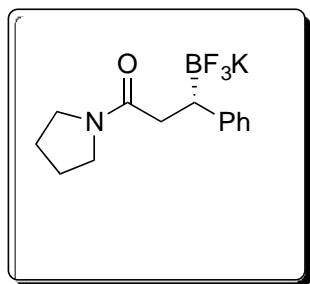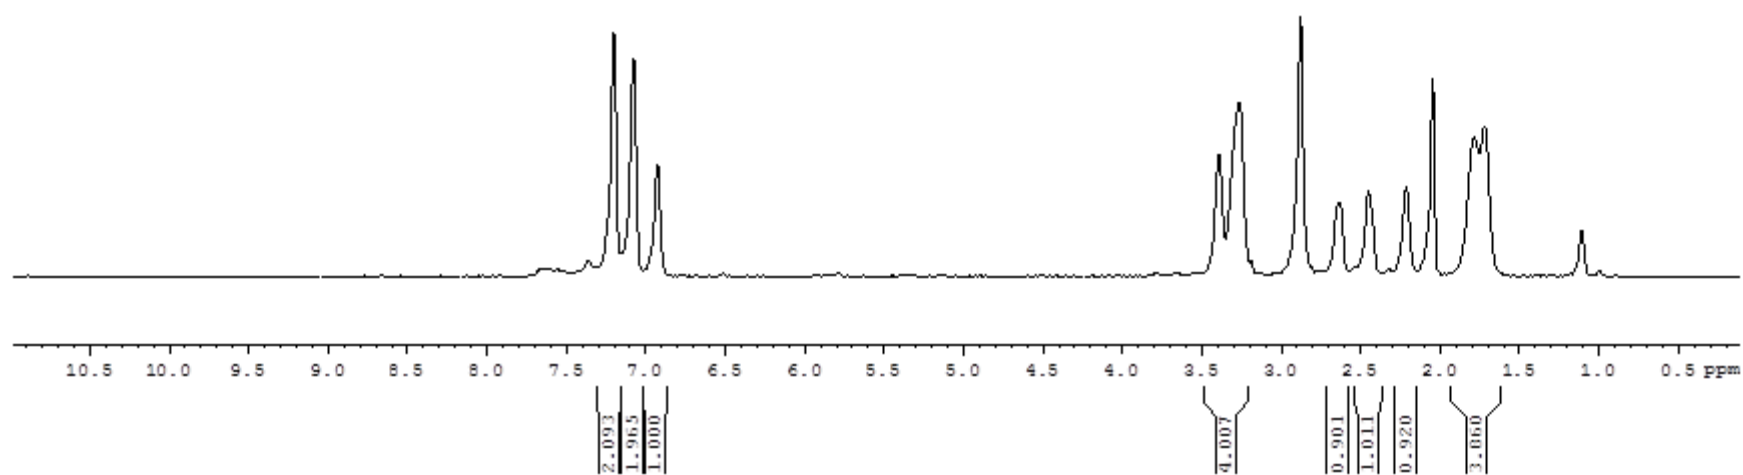

<sup>13</sup>C NMR (Acetone, 125.8 MHz) spectrum of potassium 3-phenyl-1-(pyrrolidin-1-yl)-3-(trifluoroborato)propan-1-one (2n)

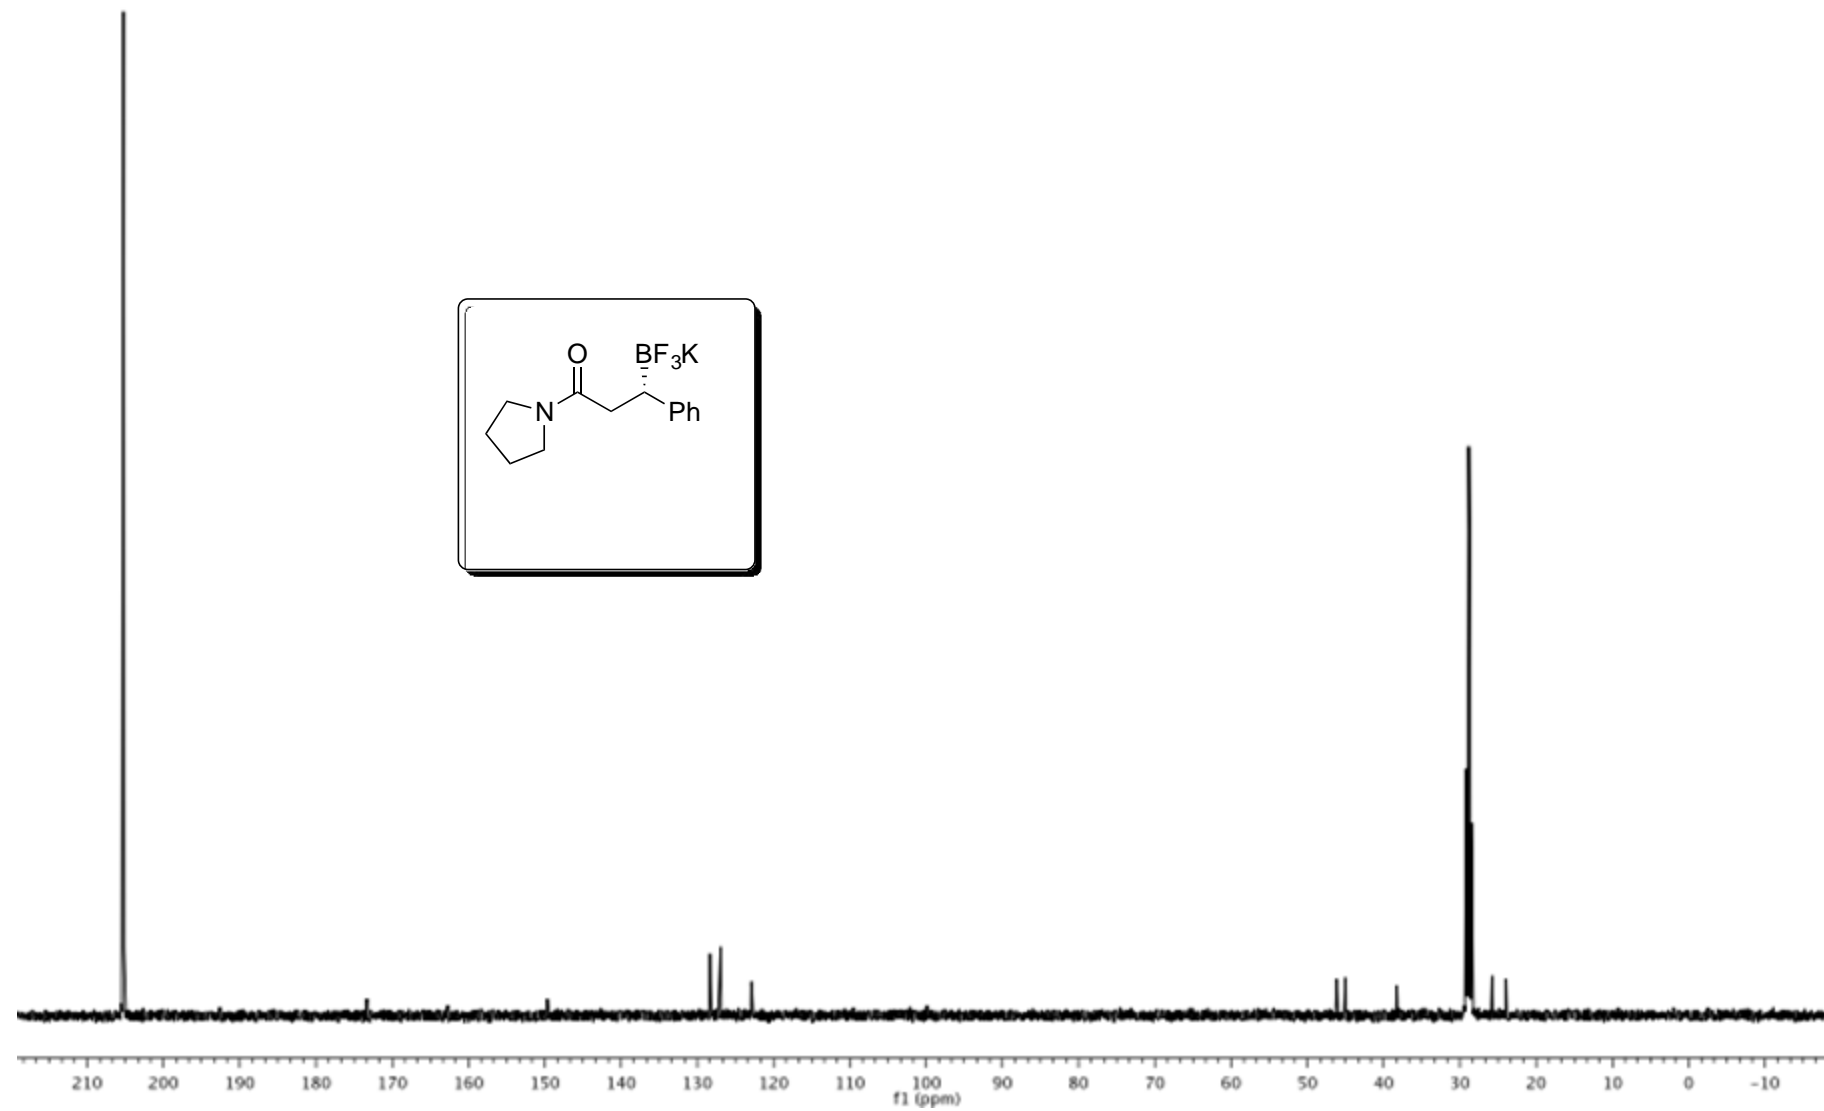

<sup>19</sup>F NMR (Acetone, 470.8 MHz) spectrum of potassium 3-phenyl-1-(pyrrolidin-1-yl)-3-(trifluoroborato)propan-1-one (2n)

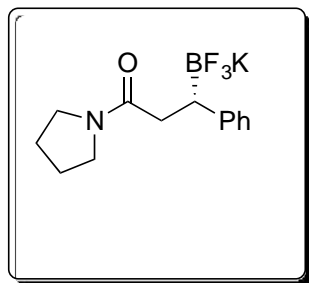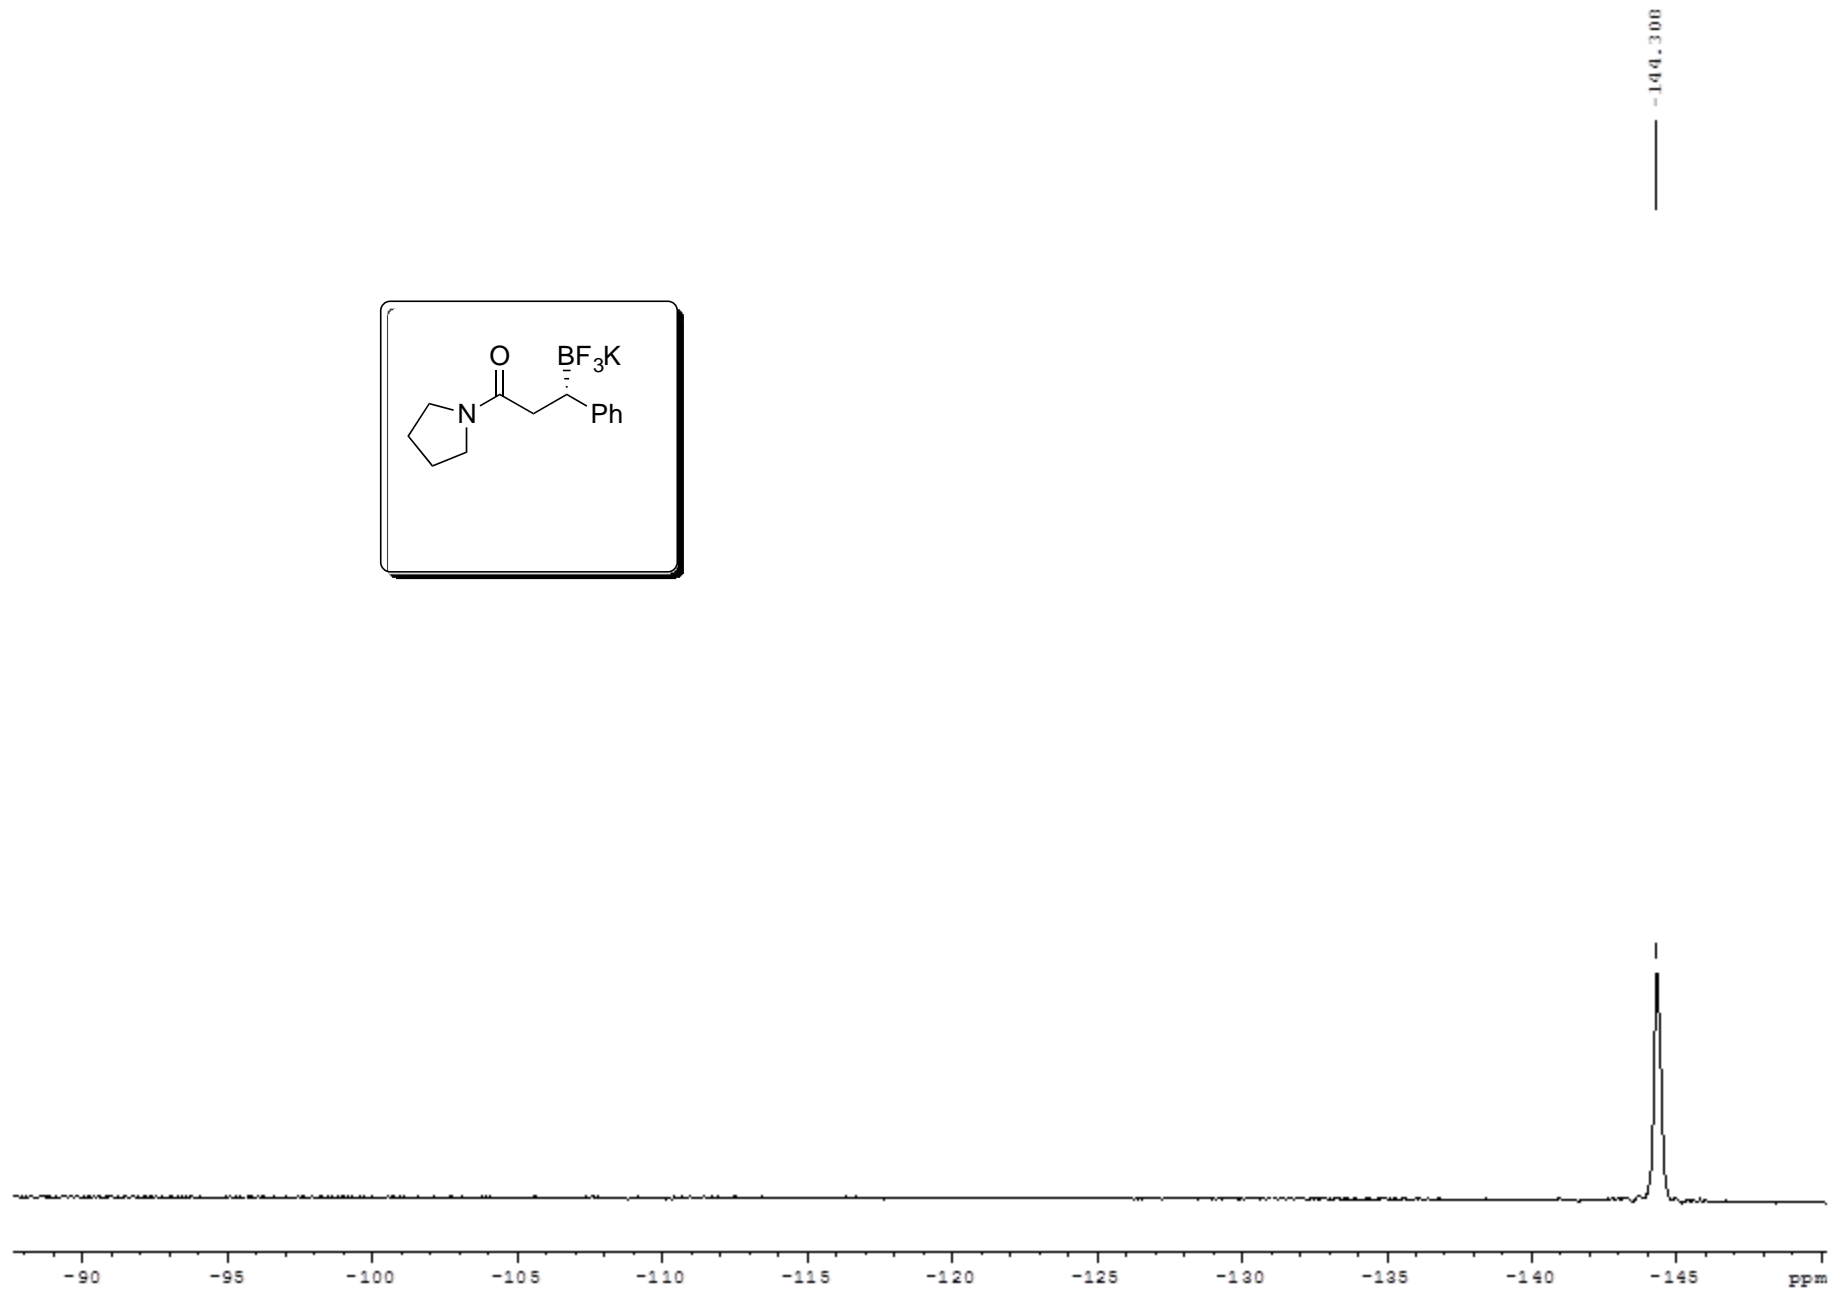

$^{11}\text{B}$  NMR (Acetone, 128.4 MHz) spectrum of potassium 3-phenyl-1-(pyrrolidin-1-yl)-3-(trifluoroborato)propan-1-one (2n)

4.095  
0.164  
-1.061

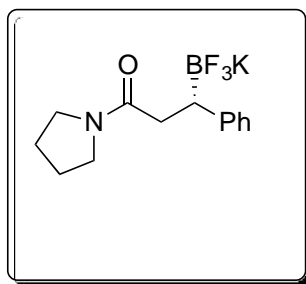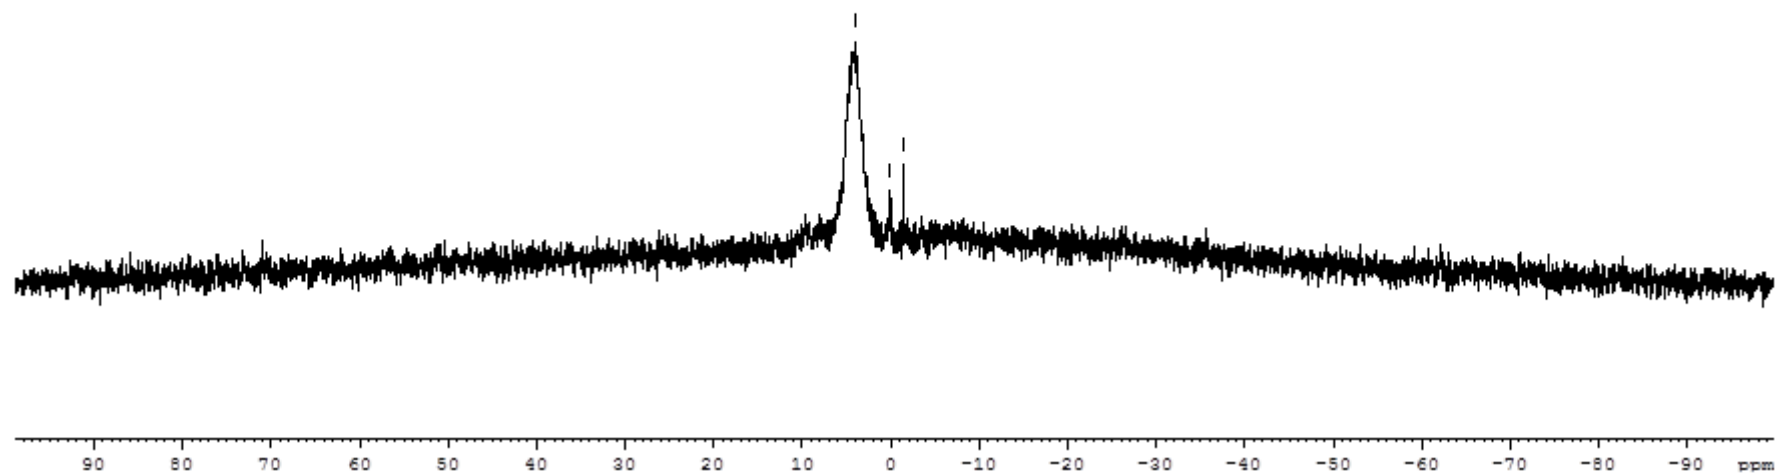

<sup>1</sup>H NMR (DMSO, 500 MHz) spectrum of potassium (*R*)-ethyl 3-(trifluoroborato)butanoate (7a)

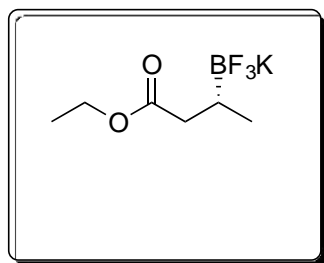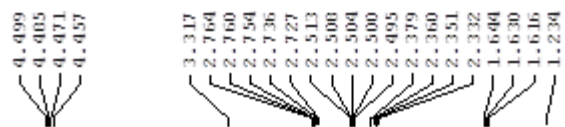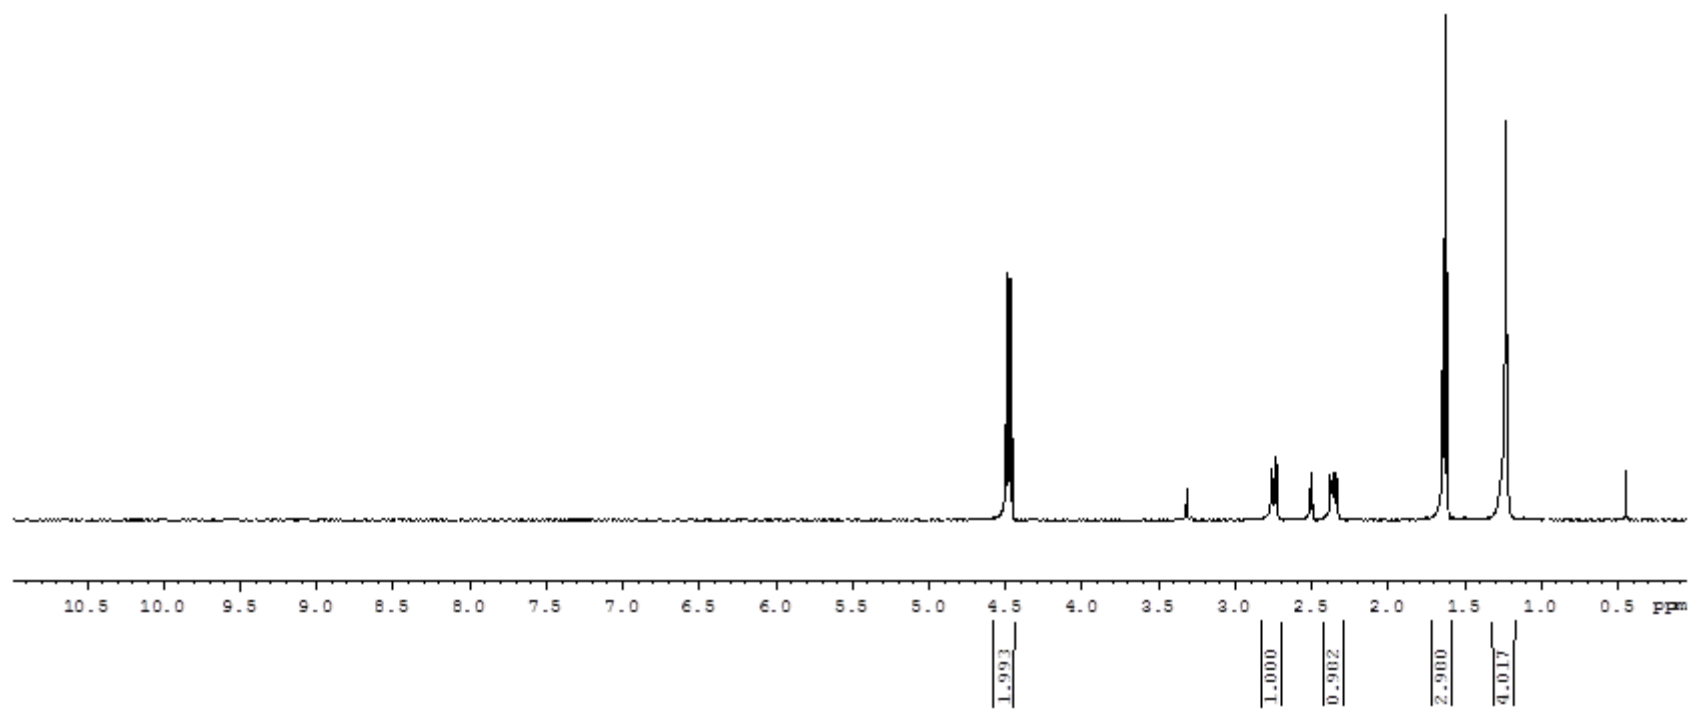

<sup>13</sup>C NMR (Acetone, 125.8 MHz) spectrum of potassium (*R*)-ethyl 3-(trifluoroborato)butanoate (**7a**)

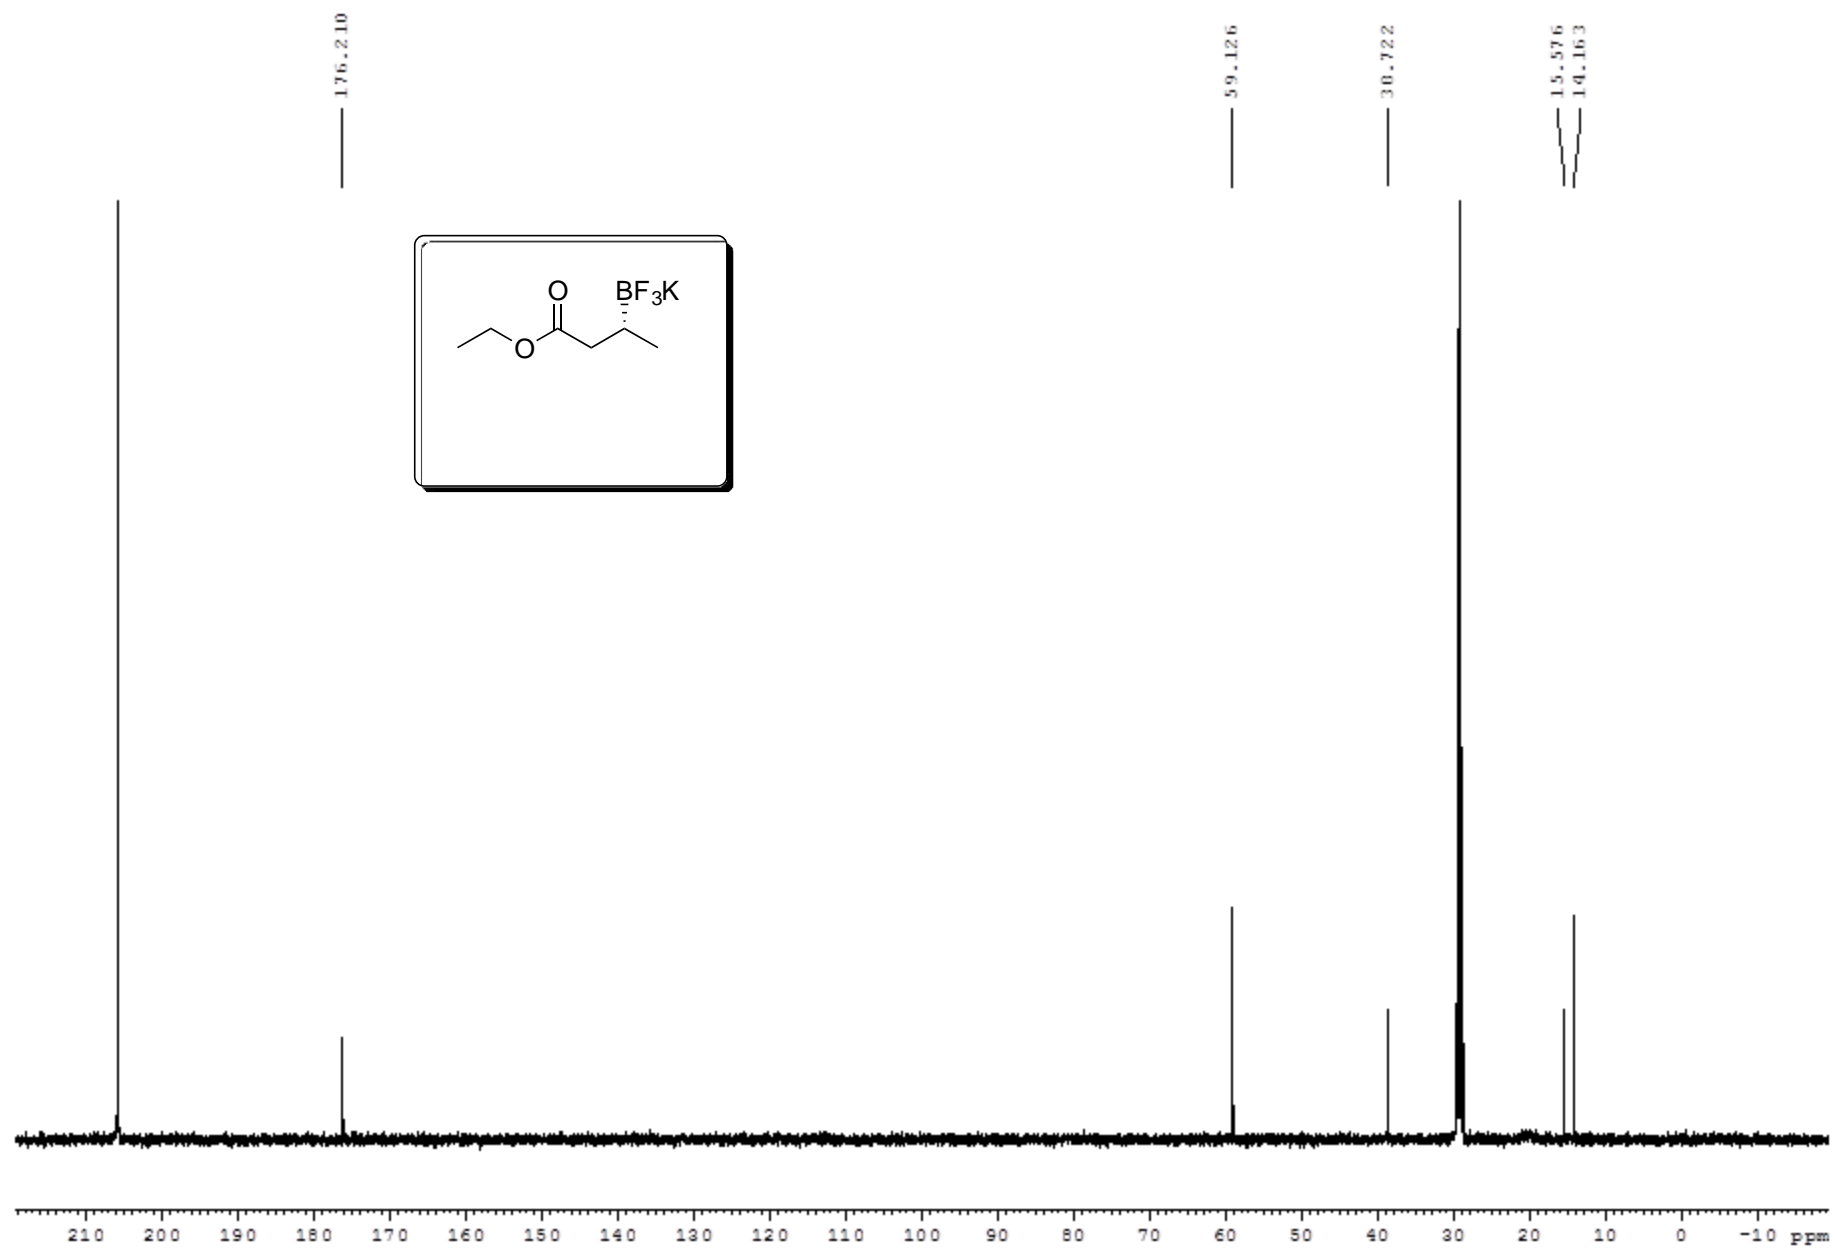



<sup>19</sup>F NMR (Acetone, 470.8 MHz) spectrum of potassium (*R*)-ethyl 3-(trifluoroborato)butanoate (7a)

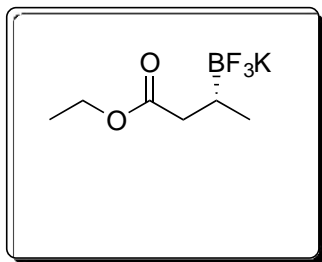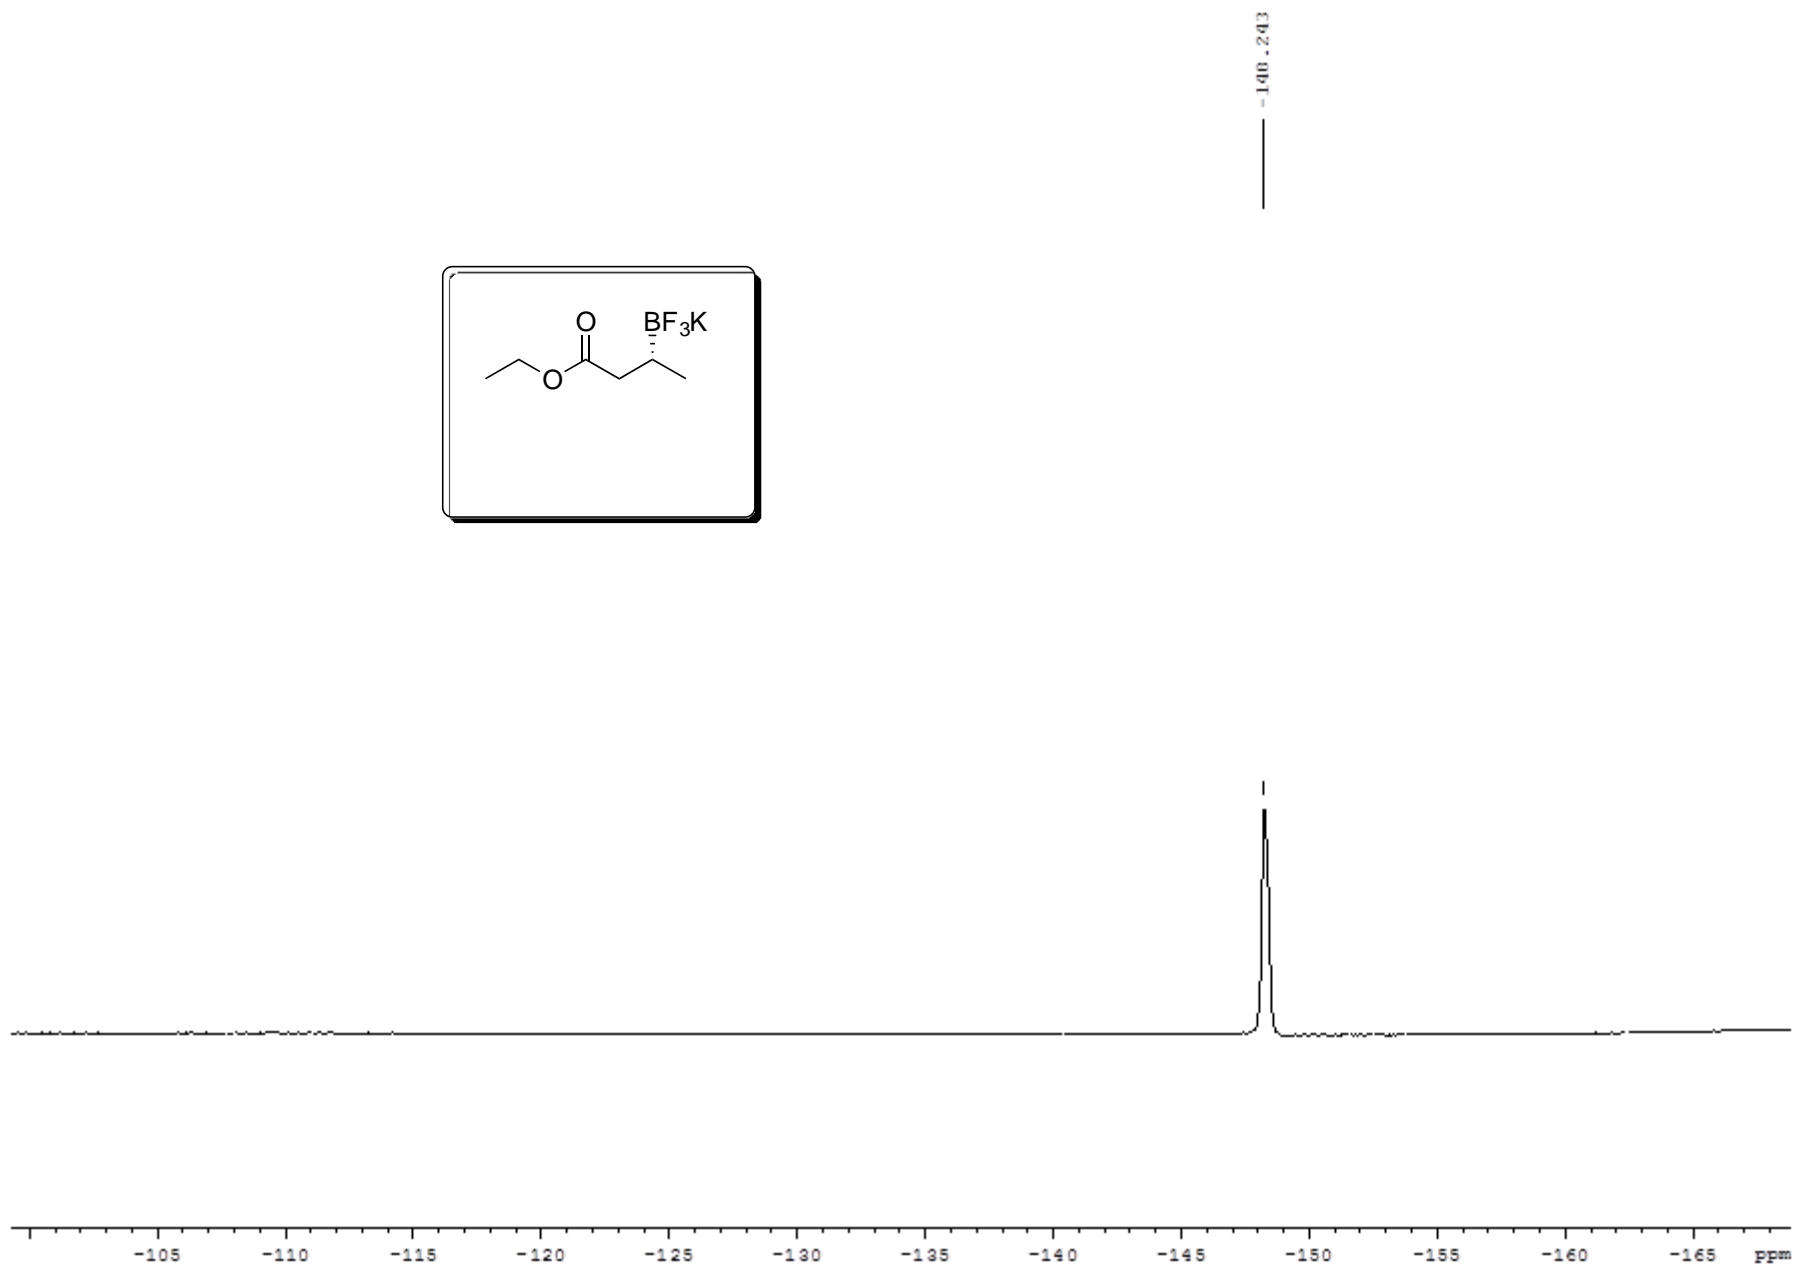

**$^{11}\text{B}$  NMR (Acetone, 128.4 MHz) spectrum of potassium (*R*)-ethyl 3-(trifluoroborato)butanoate (7a)**

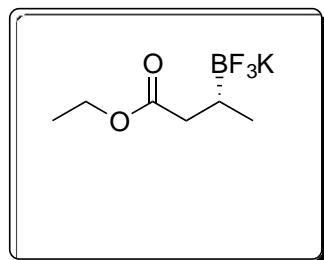

5.001

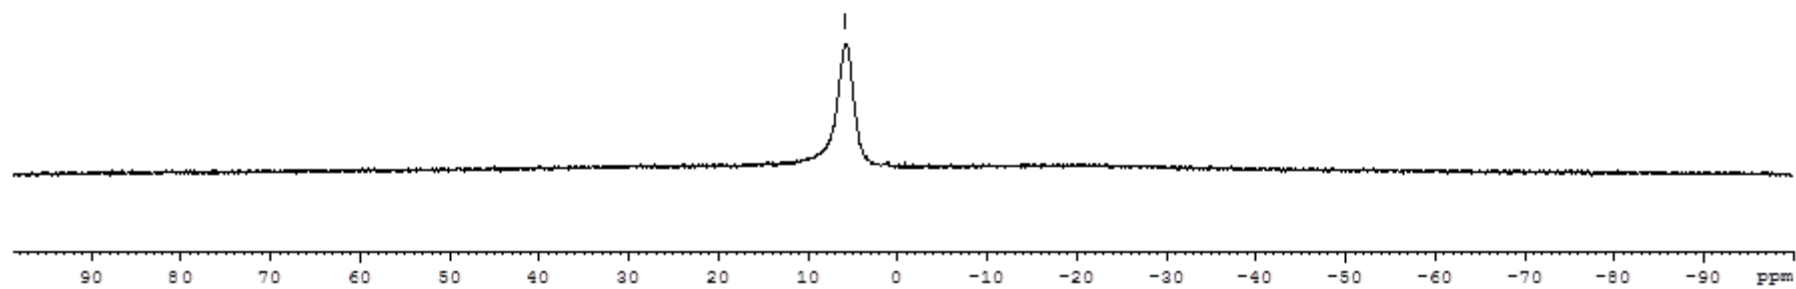

S146

<sup>1</sup>H NMR (Acetone, 500 MHz) spectrum of potassium (*R*)-ethyl 3-(trifluoroborato)octanoate (**7b**)

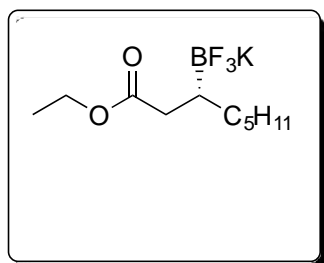

4.012  
3.990  
2.245  
2.233  
2.217  
2.205  
2.007  
1.997  
1.319  
1.304  
1.277  
1.262  
1.186  
1.157  
1.139  
1.126  
1.114  
1.099  
1.033  
0.067  
0.052

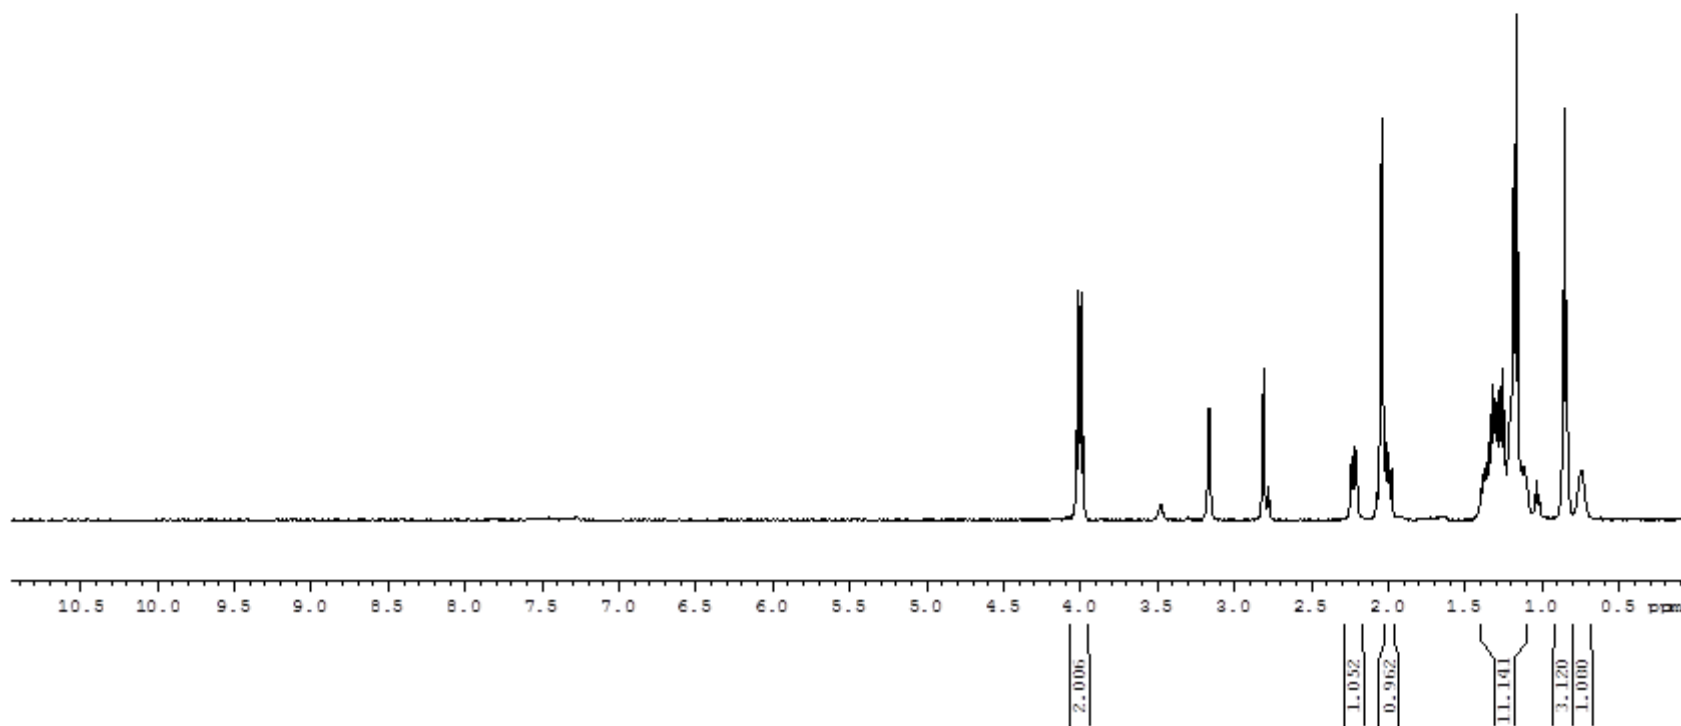

<sup>13</sup>C NMR (Acetone, 125.8 MHz) spectrum of potassium (*R*)-ethyl 3-(trifluoroborato)octanoate (**7b**)

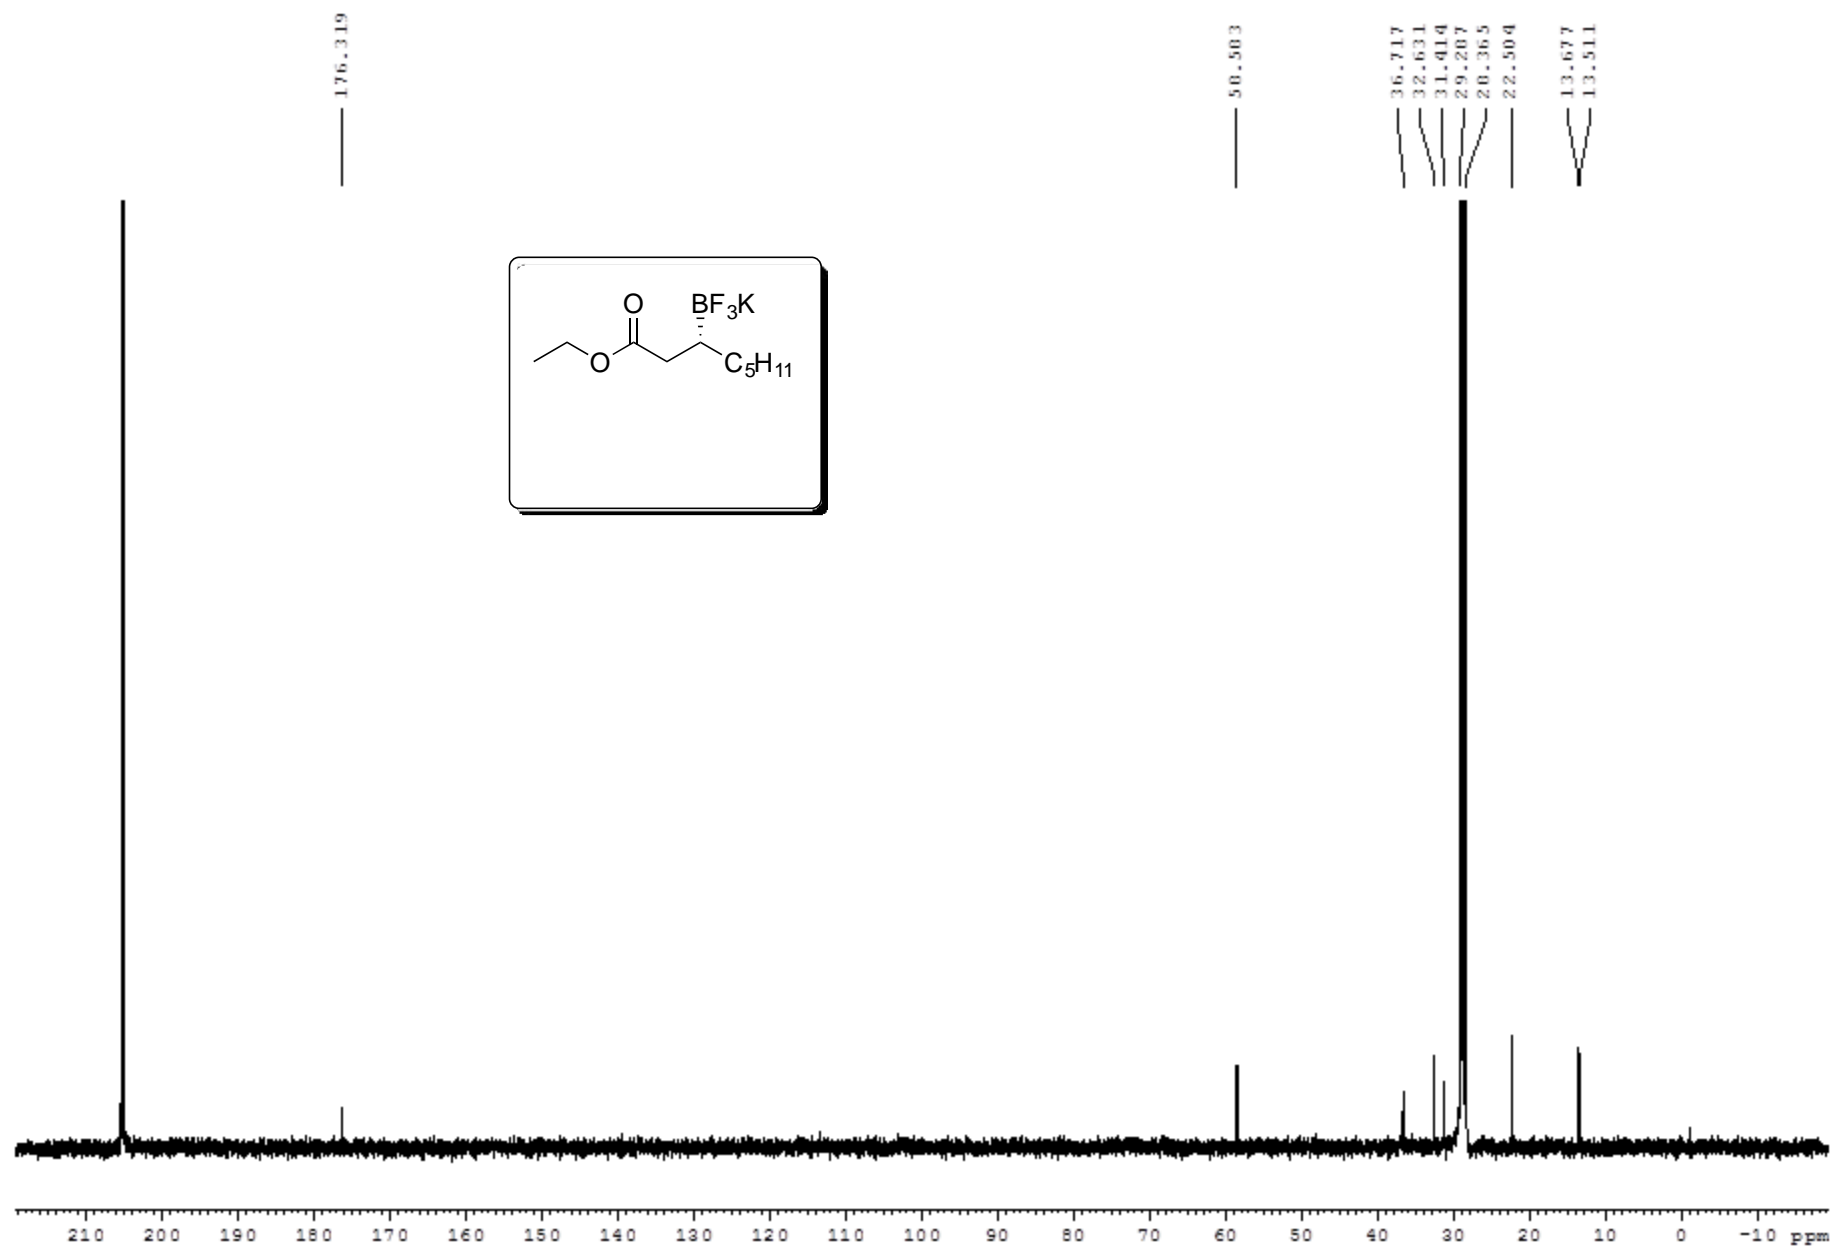

**$^{19}\text{F}$  NMR (Acetone, 470.8 MHz) spectrum of potassium (*R*)-ethyl 3-(trifluoroborato)octanoate (**7b**)**

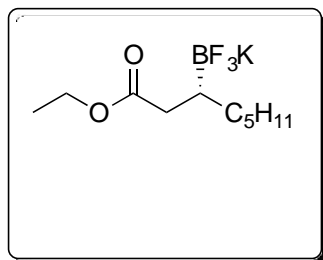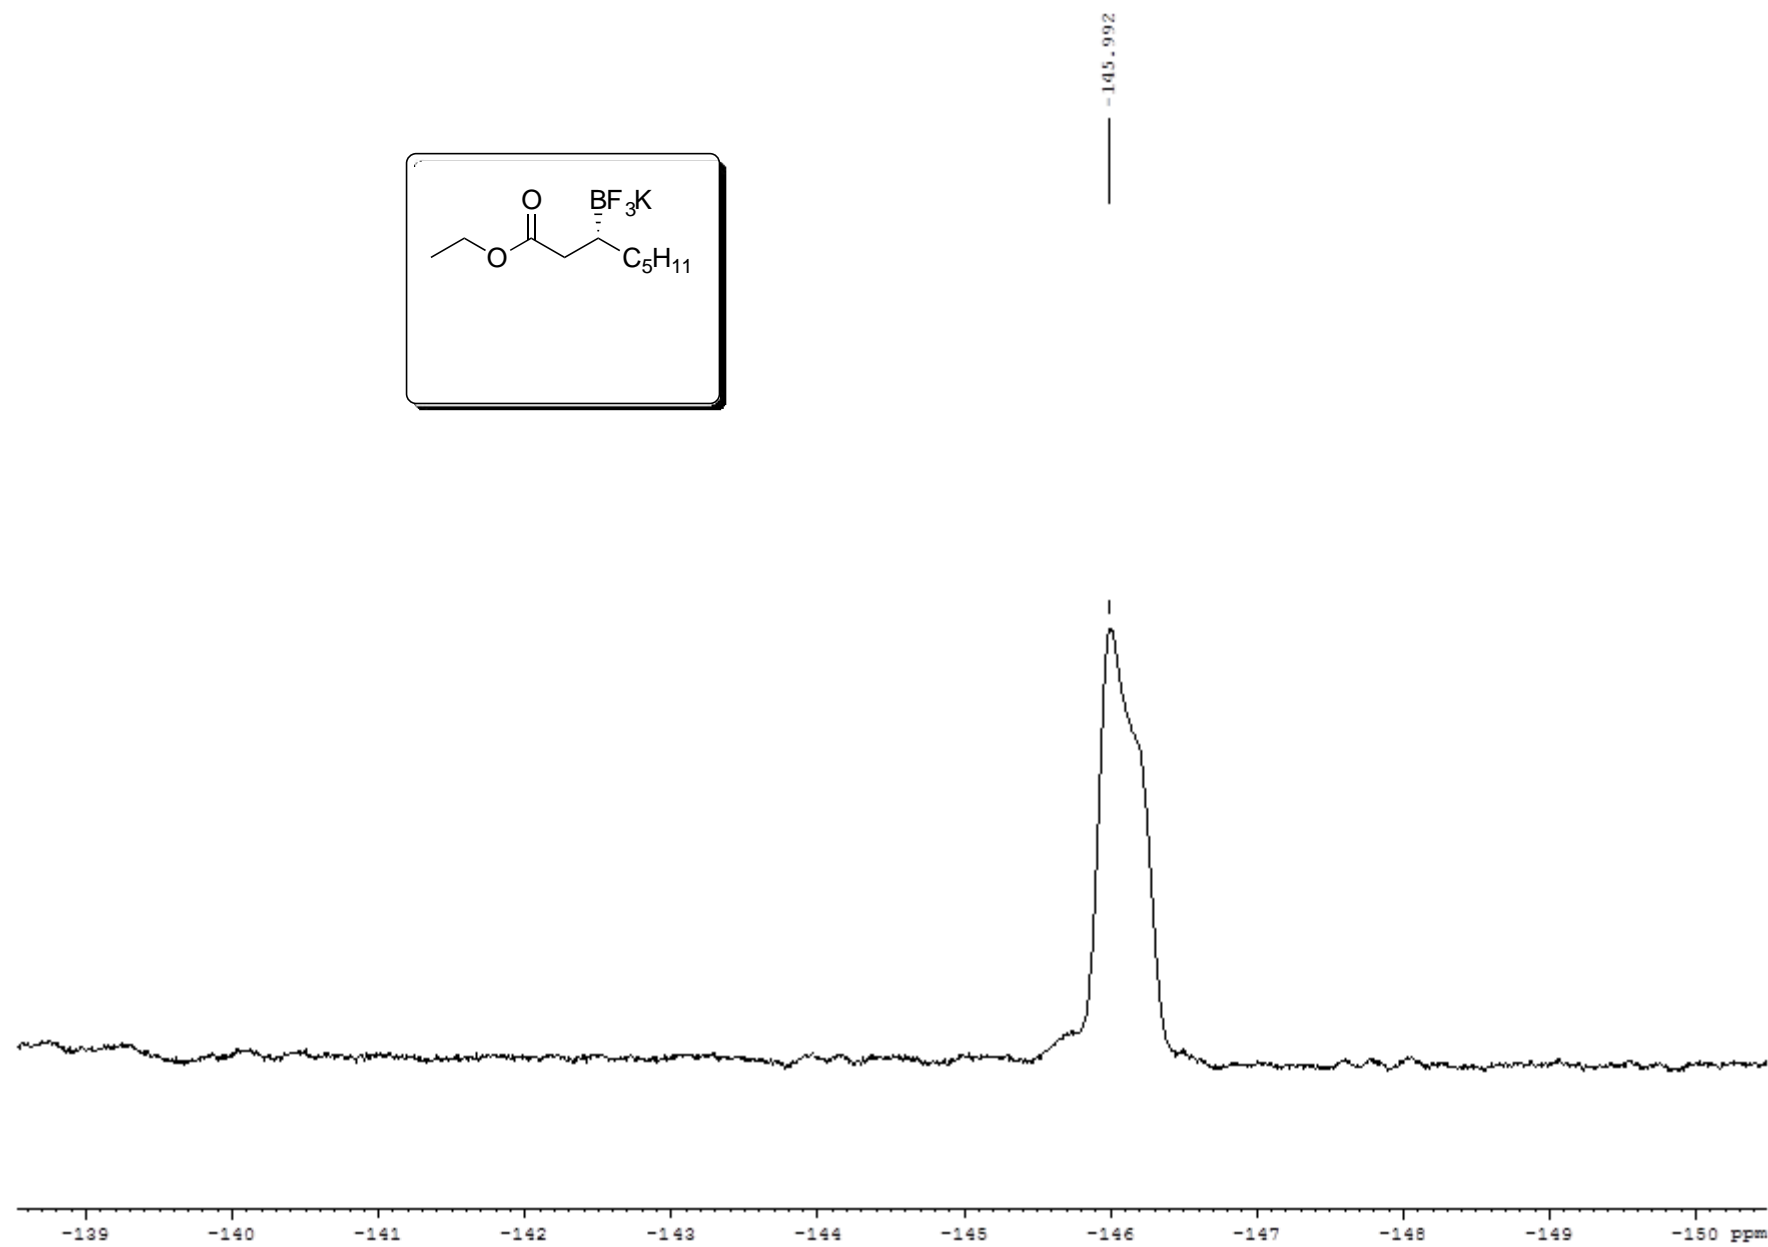

$^{11}\text{B}$  NMR (Acetone, 128.4 MHz) spectrum of potassium (*R*)-ethyl 3-(trifluoroborato)octanoate (**7b**)

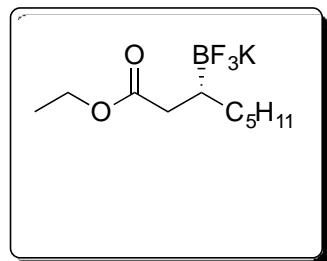

5.004

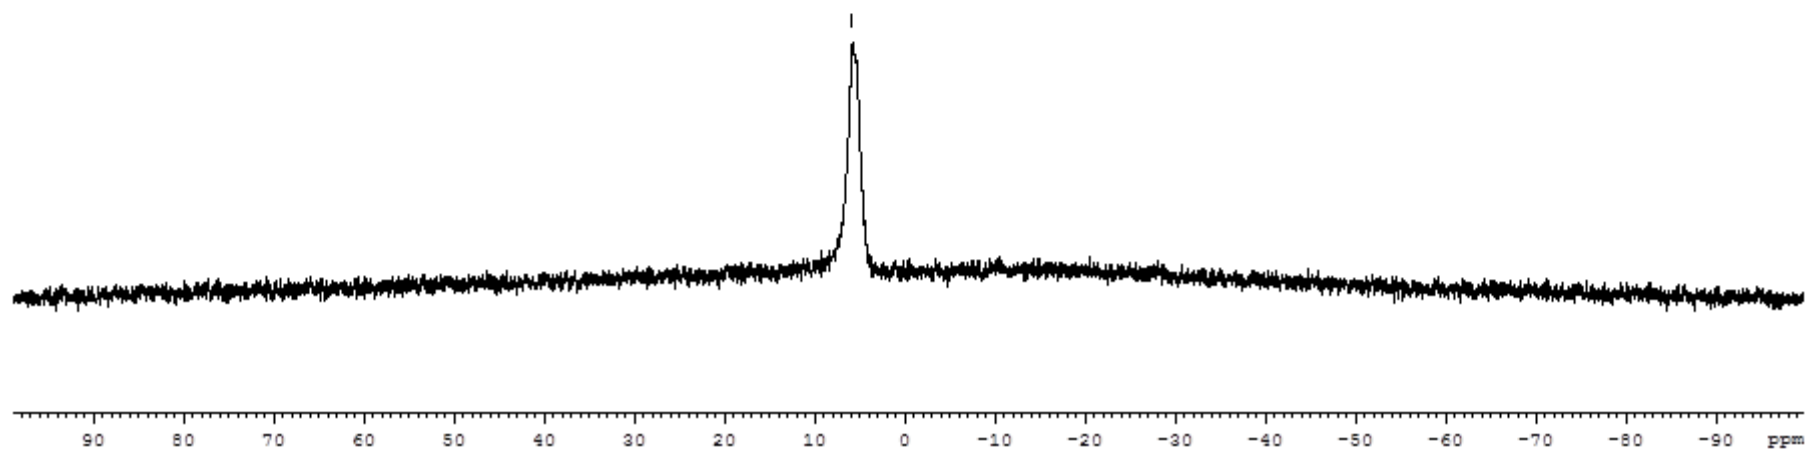

S150

<sup>1</sup>H NMR (Acetone, 300 MHz) spectrum of potassium (*R*)-3- trifluoroborato -1-phenylbutan-1-one (7c)

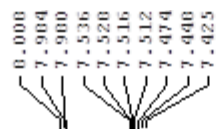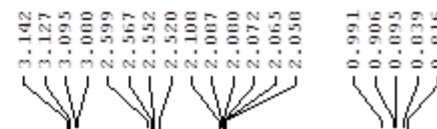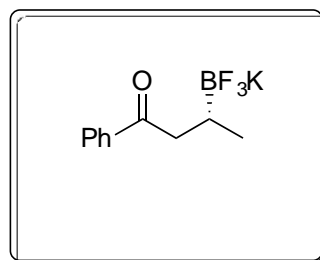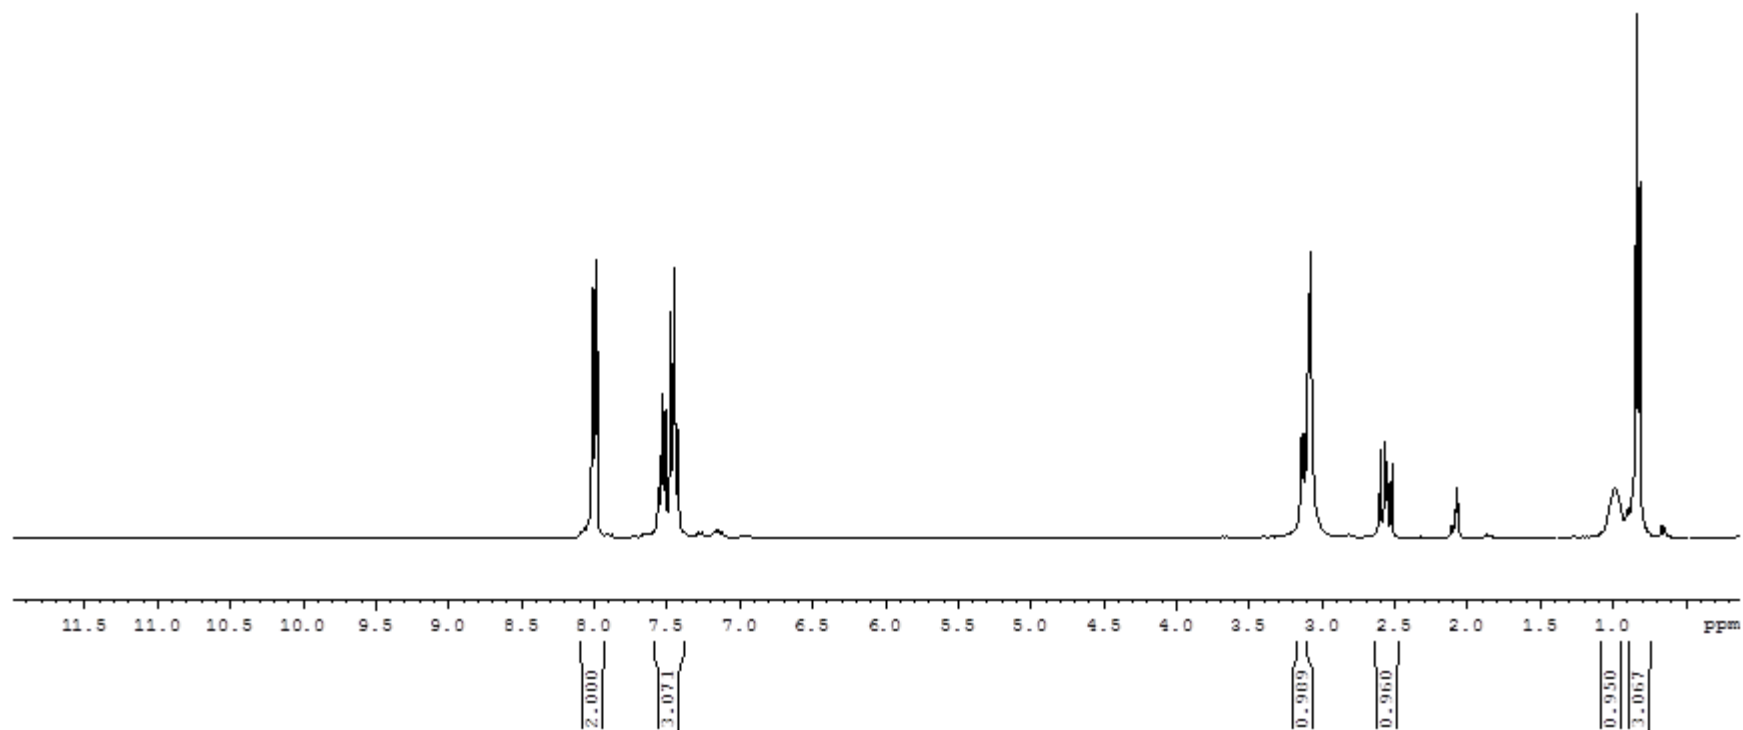

<sup>13</sup>C NMR (Acetone, 75.4 MHz) spectrum of potassium (*R*)-3- trifluoroborato -1-phenylbutan-1-one (7c)

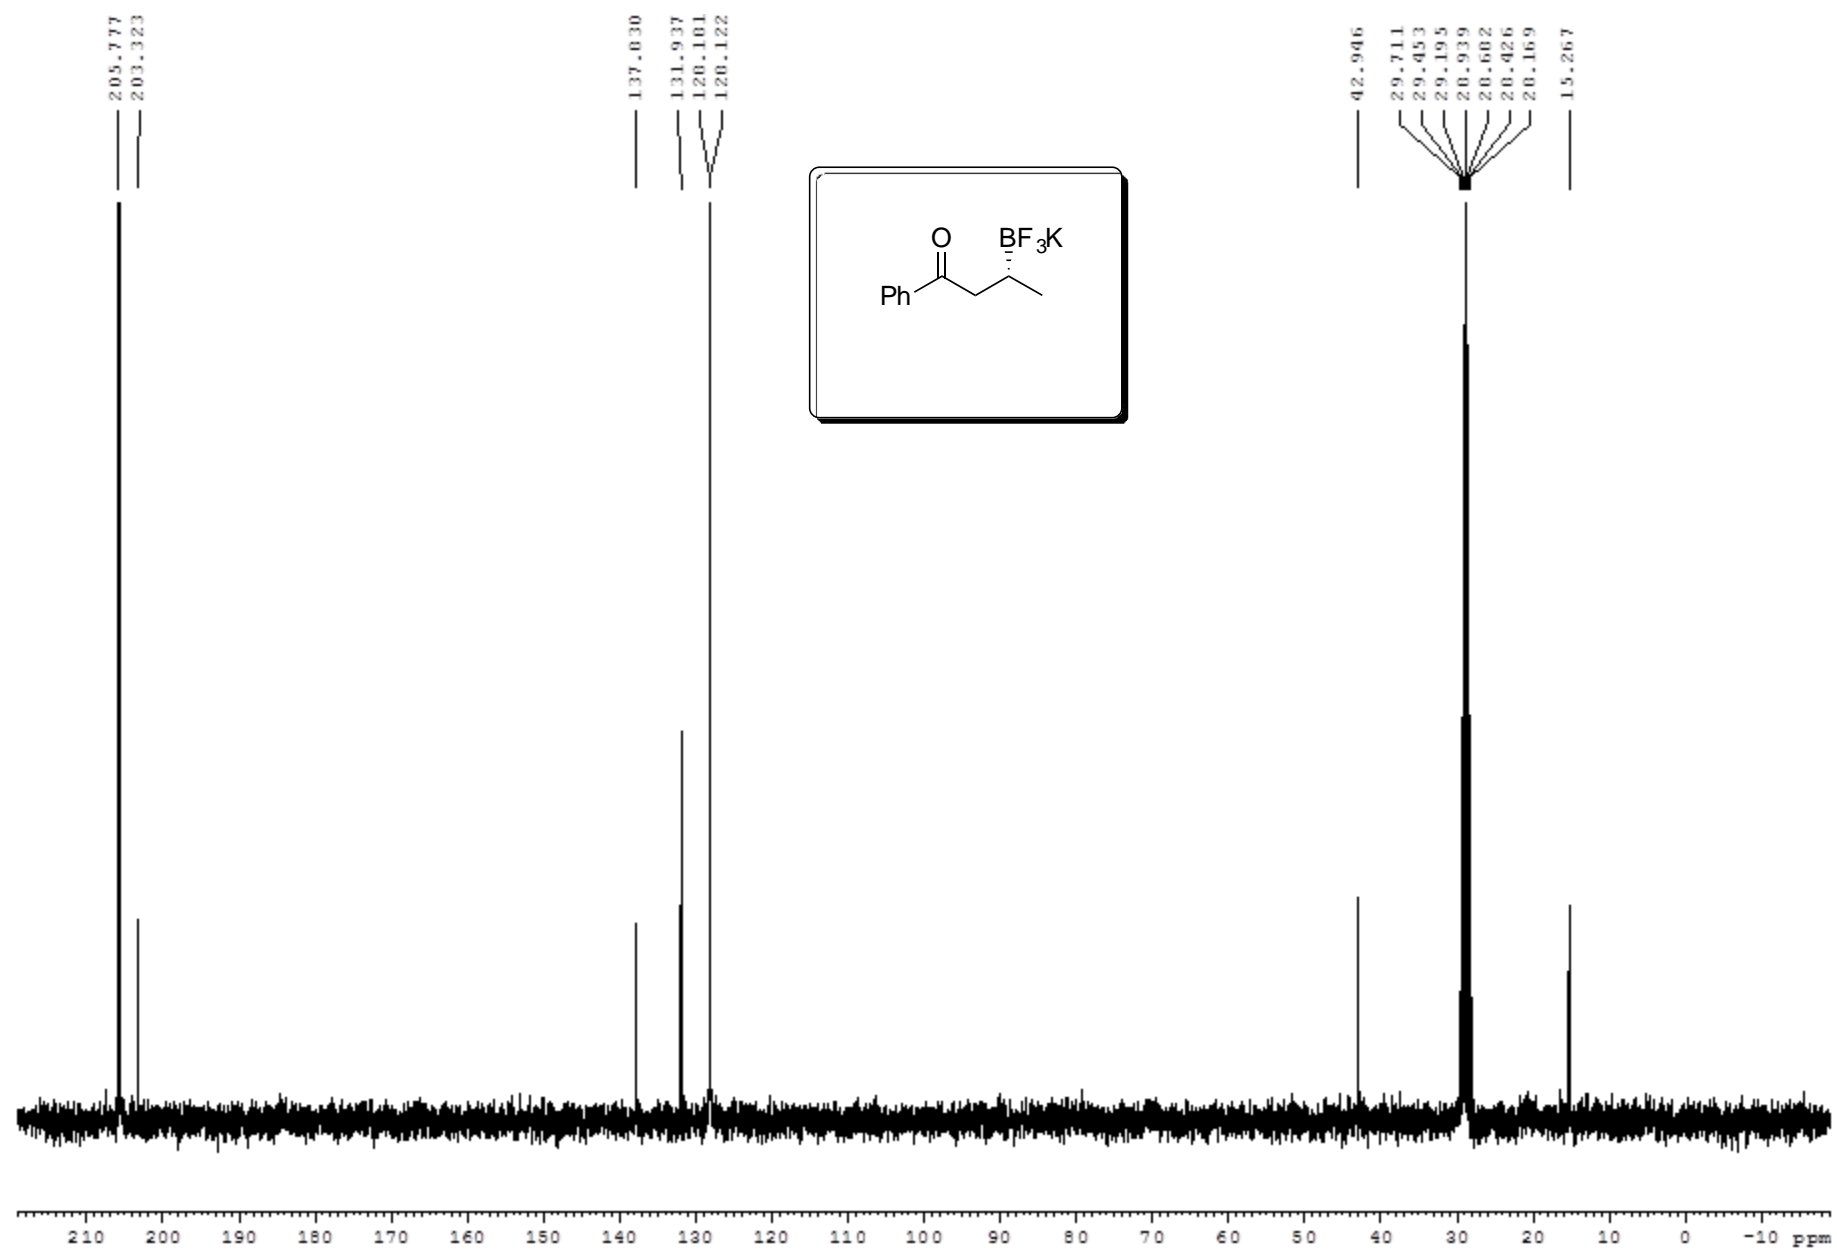



**$^{19}\text{F}$  NMR (Acetone, 282.4 MHz) spectrum of potassium (*R*)-3- trifluoroborato -1-phenylbutan-1-one (7c)**

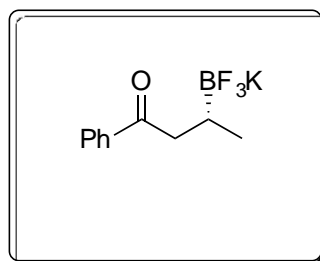

-148.001

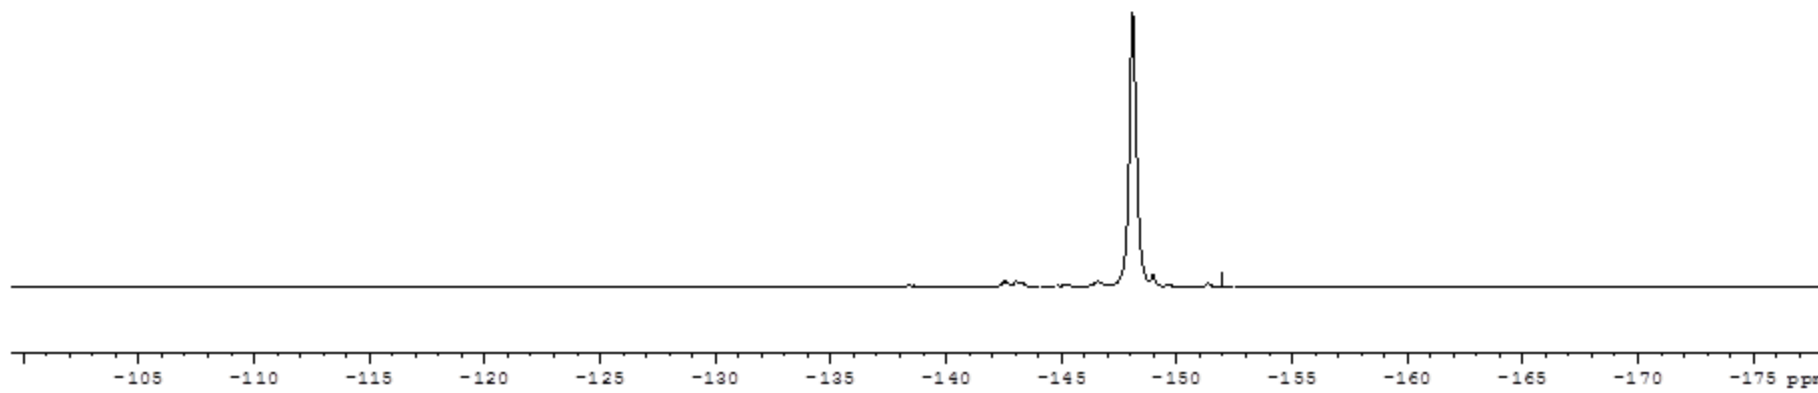

S153

**$^{11}\text{B}$  NMR (Acetone, 128.4 MHz) spectrum of potassium (*R*)-3- trifluoroborato -1-phenylbutan-1-one (7c)**

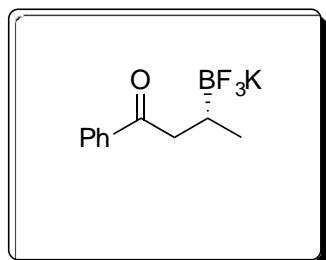

5.045

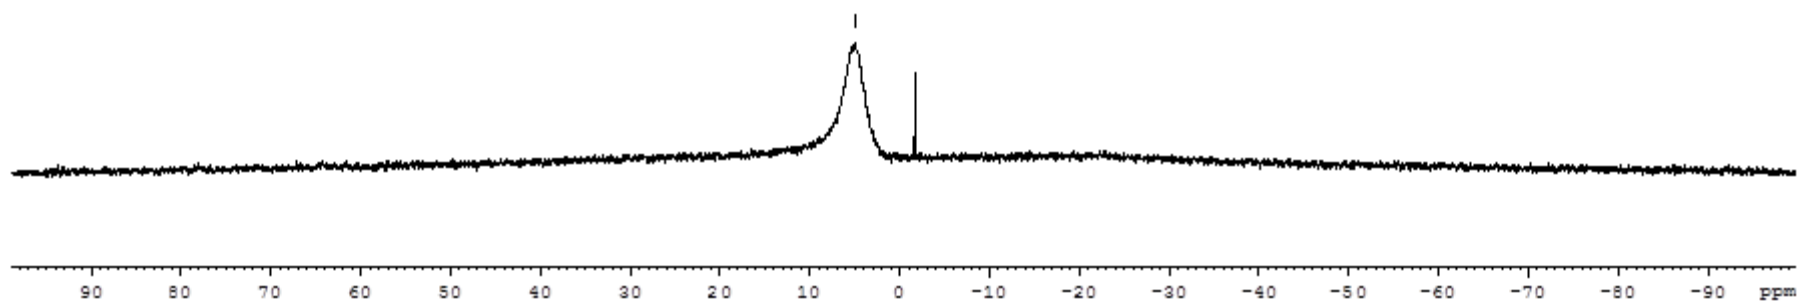

<sup>1</sup>H NMR (Acetone, 500 MHz) spectrum of potassium (*S*)-1,3-diphenyl-3-(trifluoroborato)butan-1-one (7d)

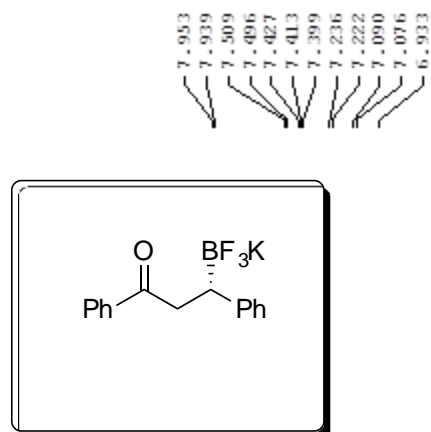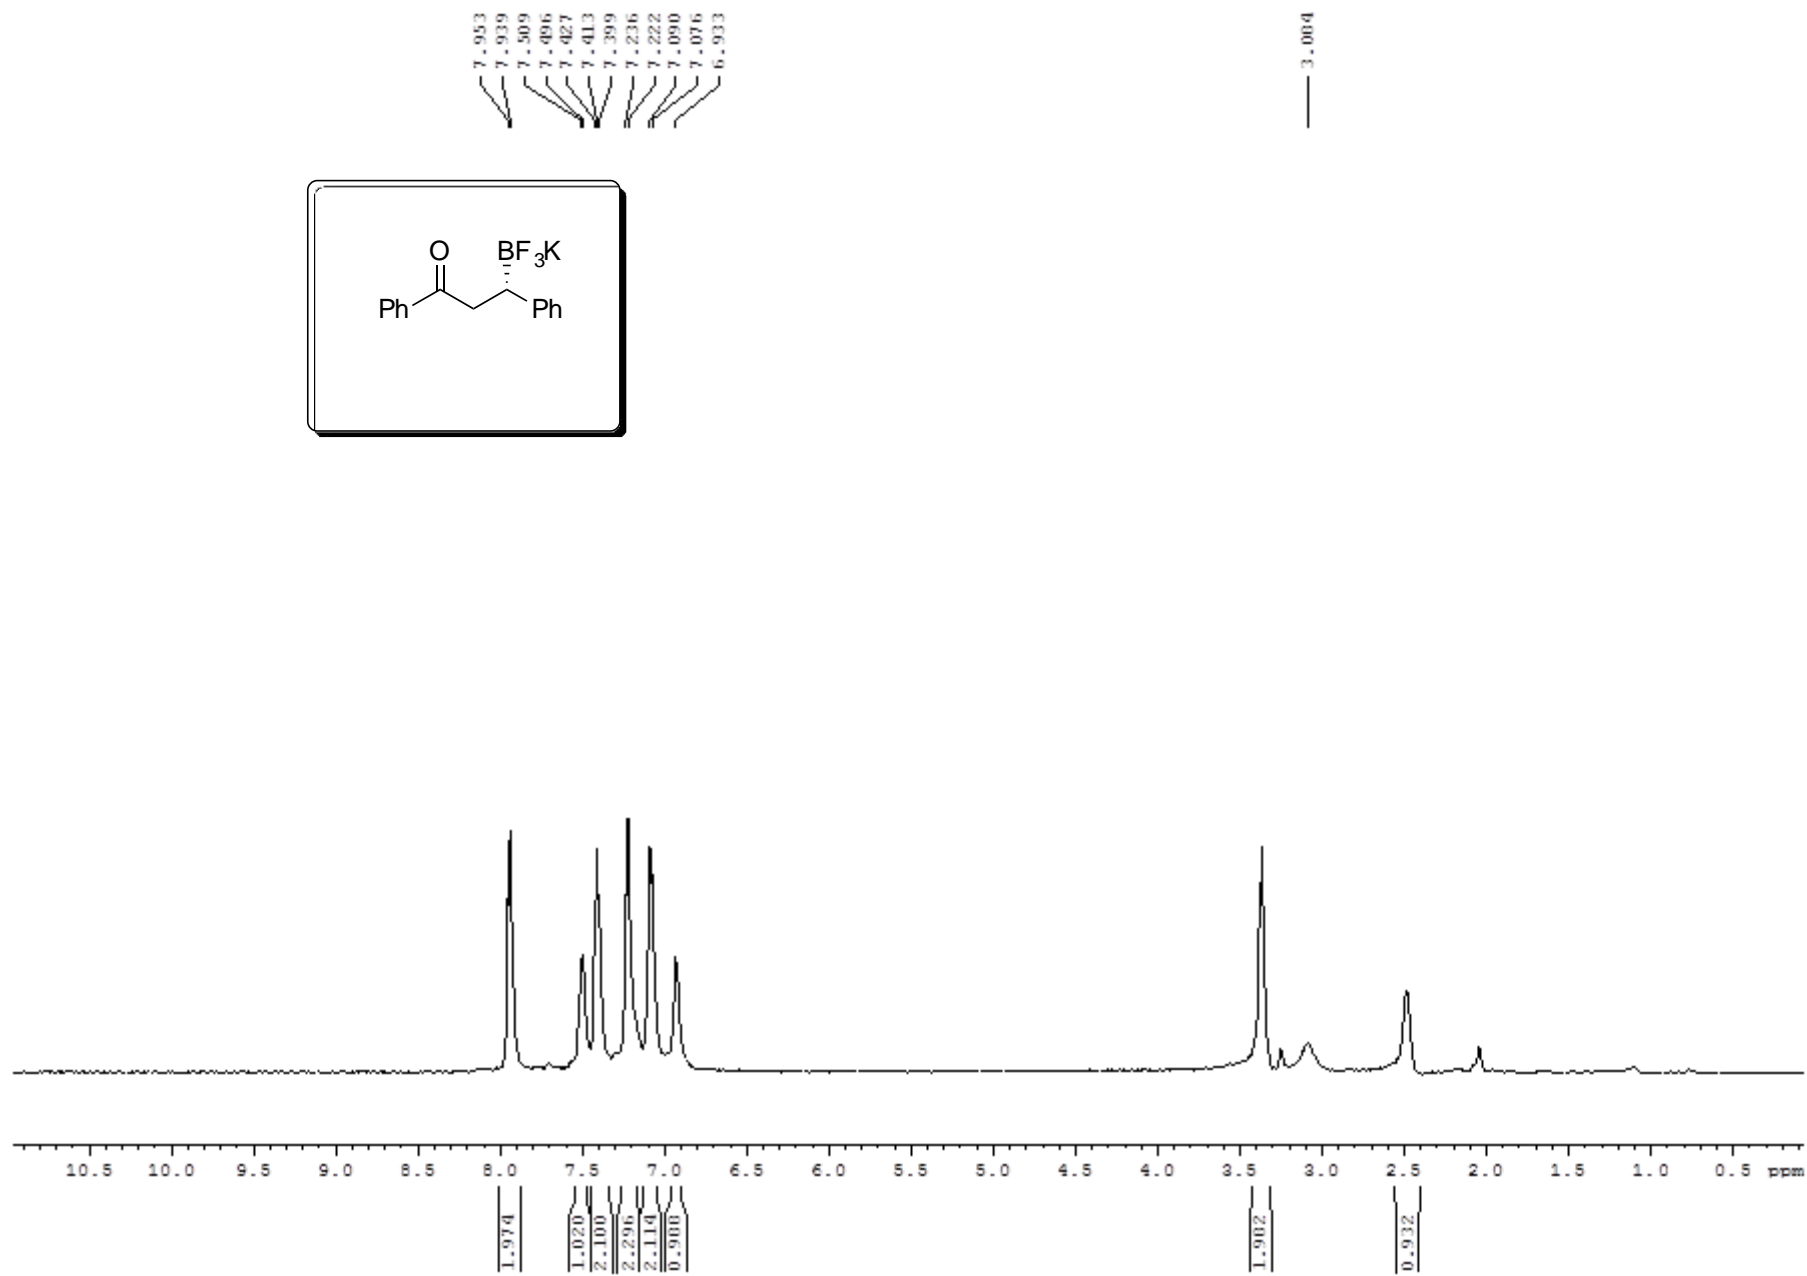

<sup>13</sup>C NMR (Acetone, 125.8 MHz) spectrum of potassium (*S*)-1,3-diphenyl-3-(trifluoroborate)butan-1-one (7d)

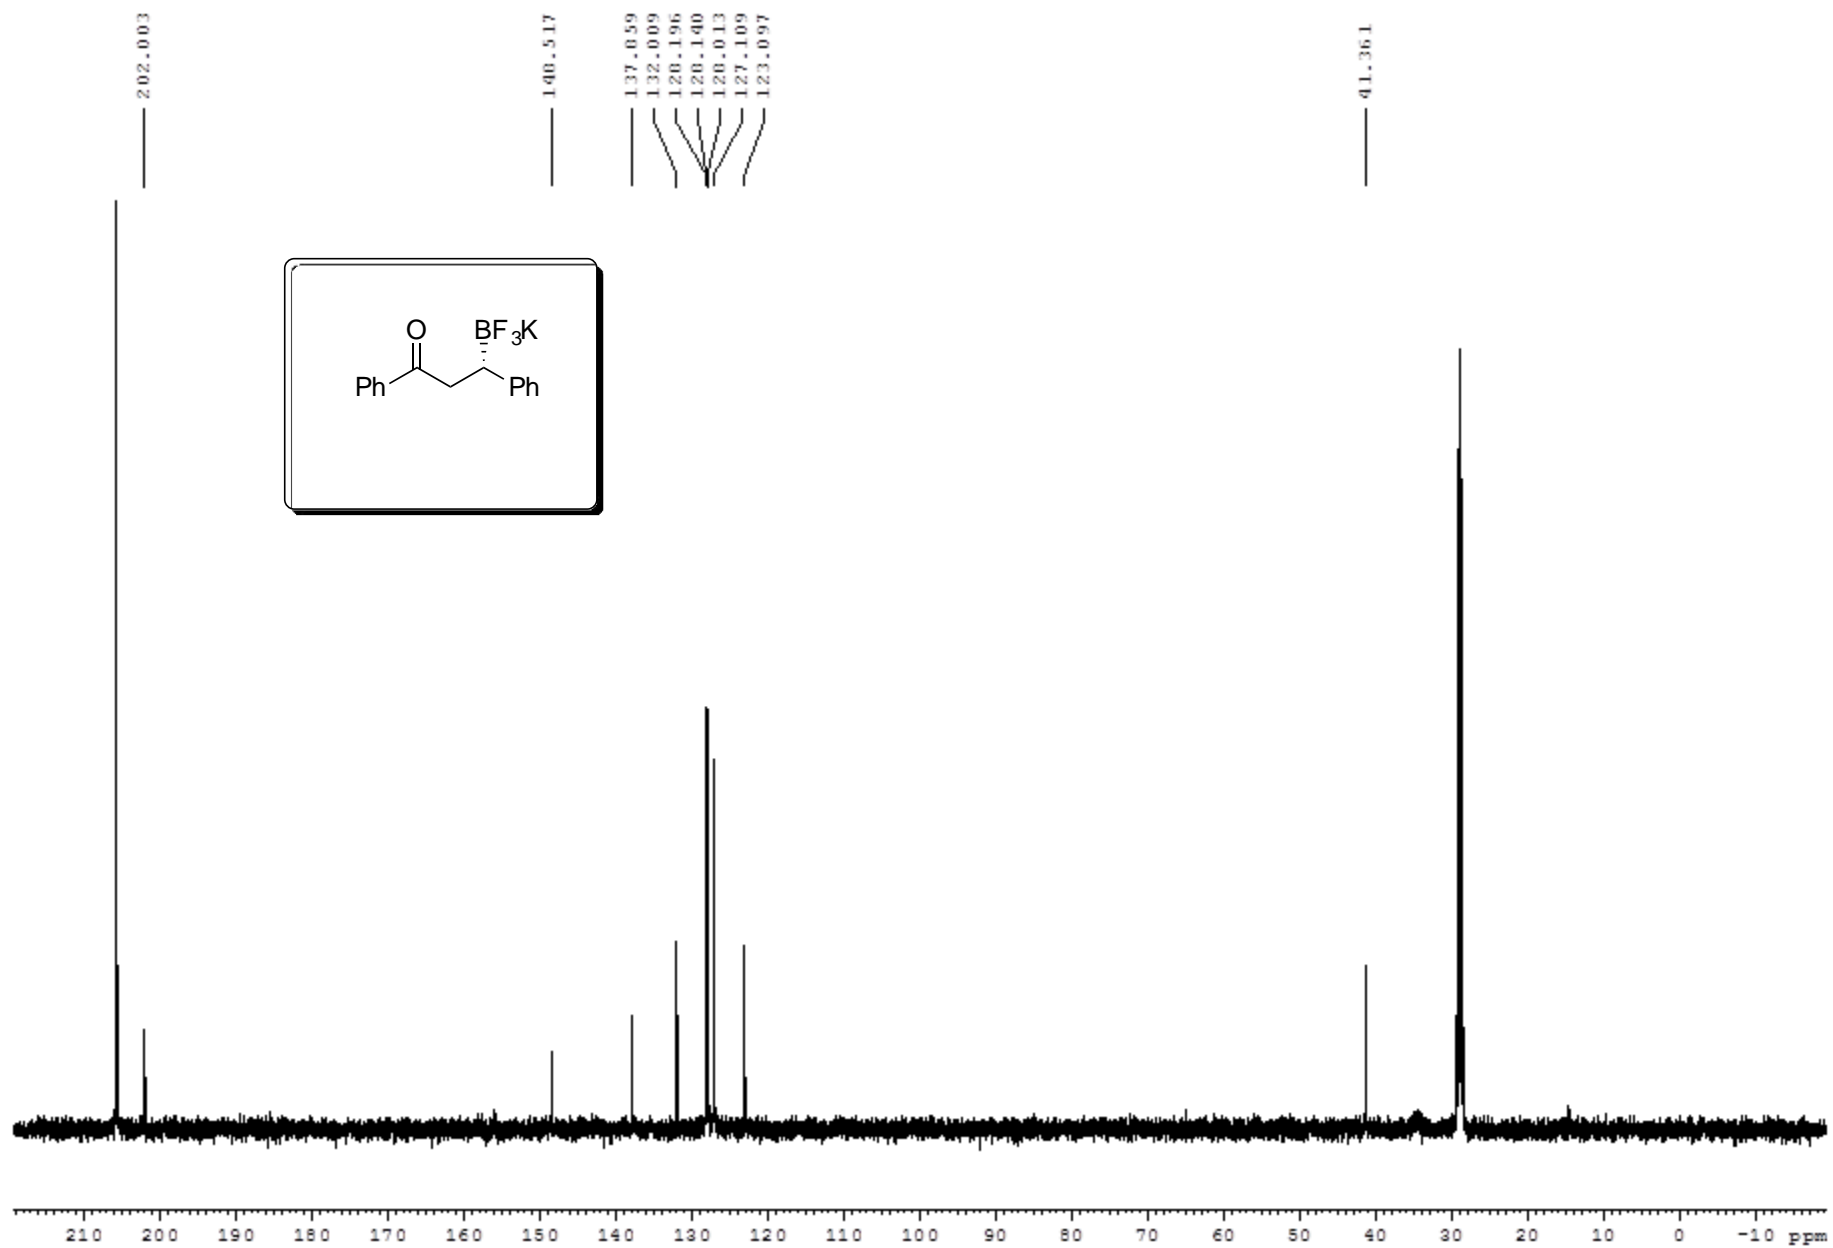

**$^{19}\text{F}$  NMR (Acetone, 470.8 MHz) spectrum of potassium (*S*)-1,3-diphenyl-3-(trifluoroborato)butan-1-one (7d)**

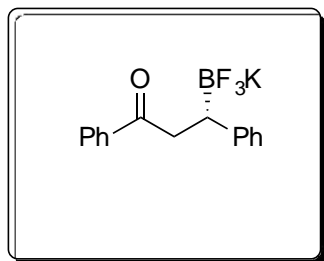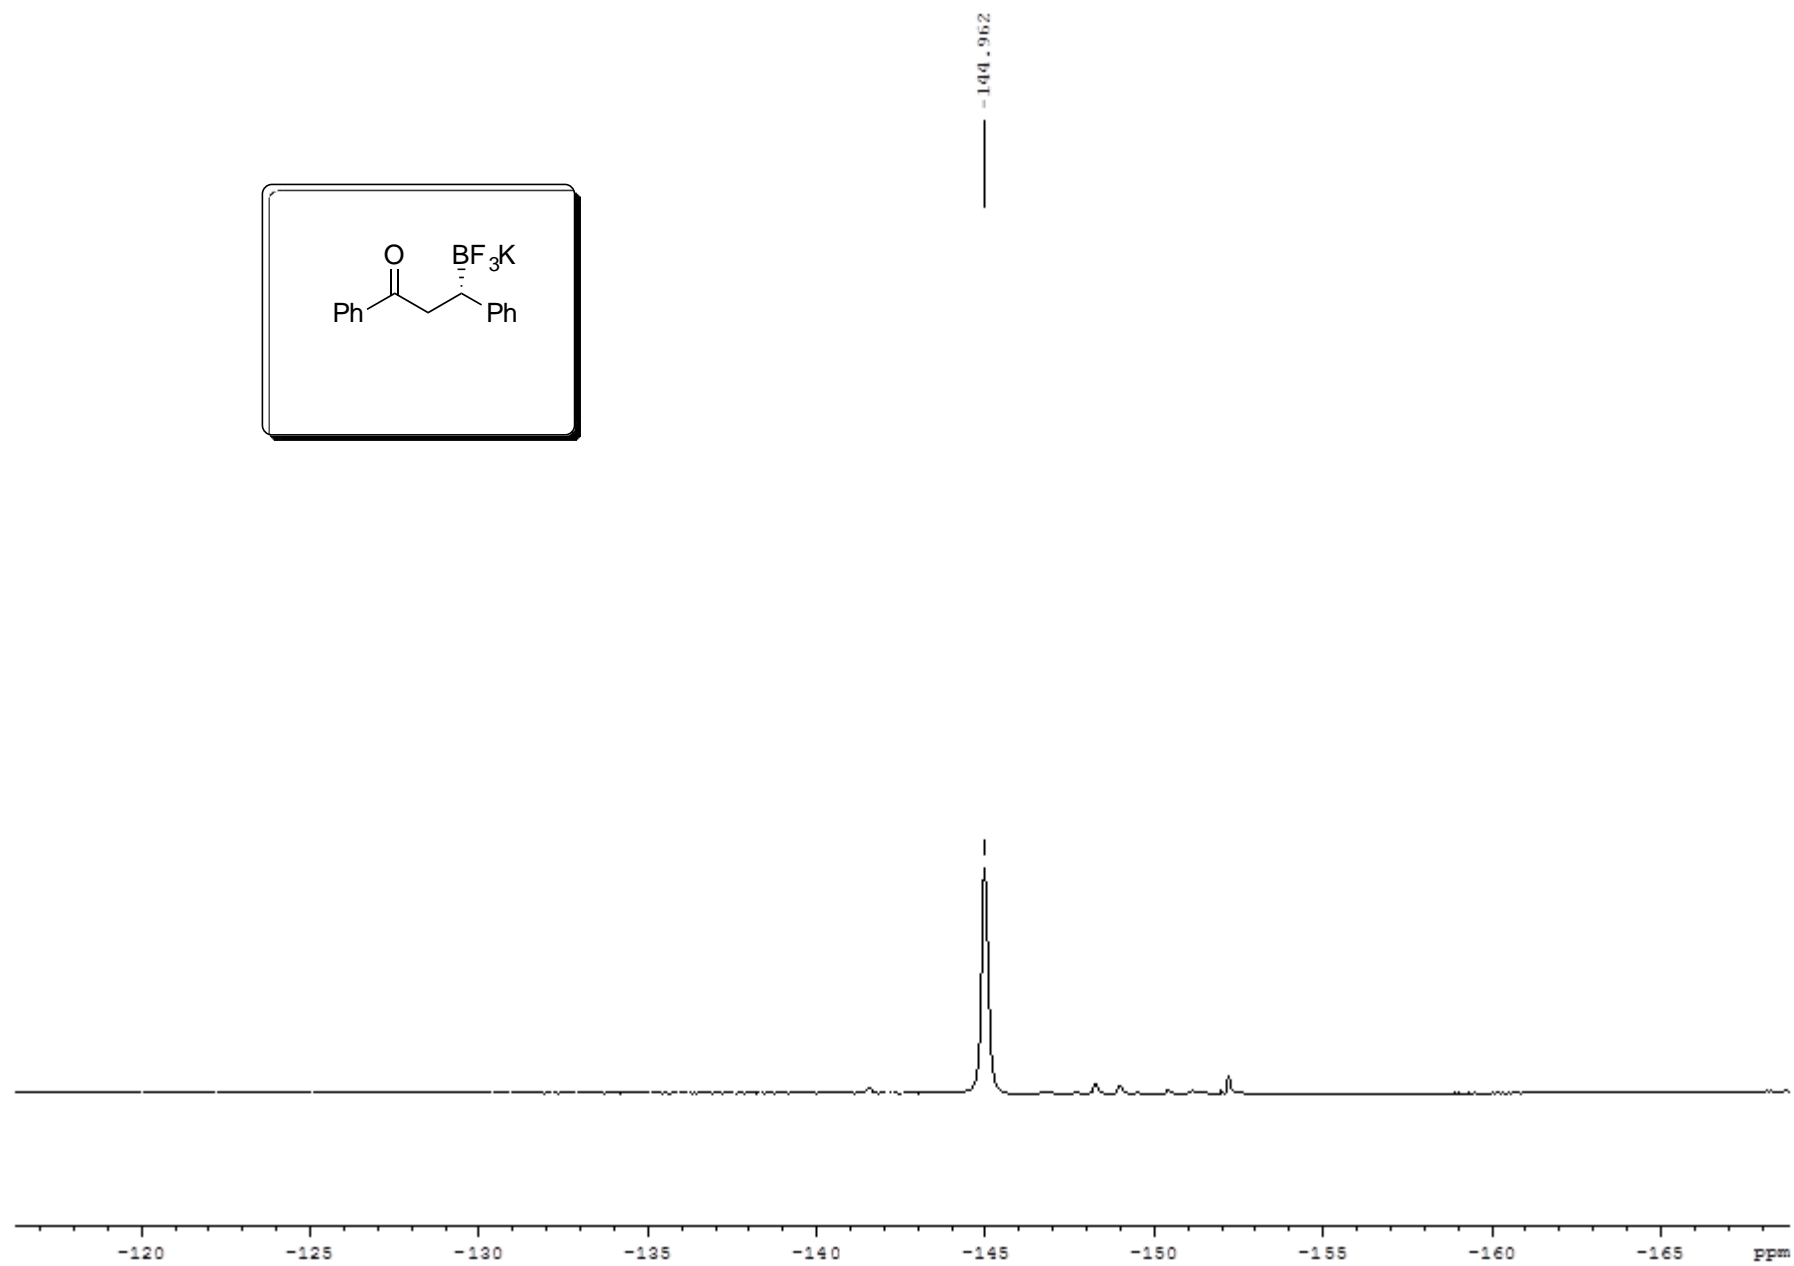

**$^{11}\text{B}$  NMR (Acetone, 128.4 MHz) spectrum of potassium (*S*)-1,3-diphenyl-3-(trifluoroborate)butan-1-one (7d)**

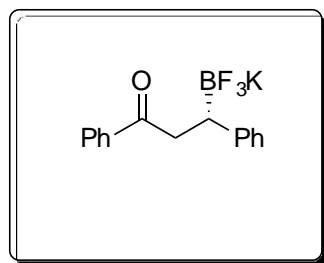

4.509

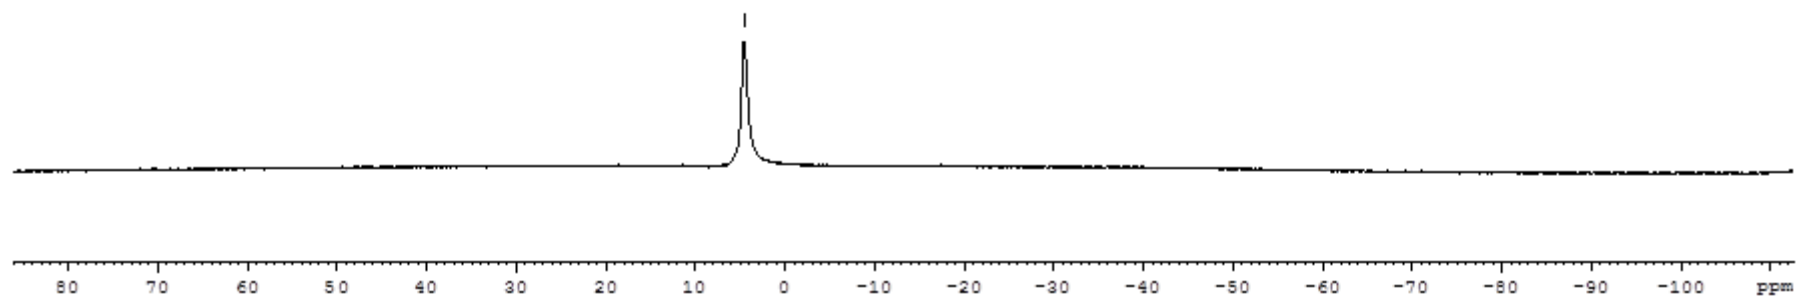

<sup>1</sup>H NMR (DMSO, 360 MHz) spectrum of potassium (*R*)-3-(Trifluoroborato)cyclohexanone (7e)

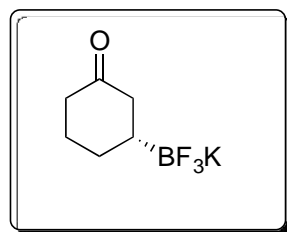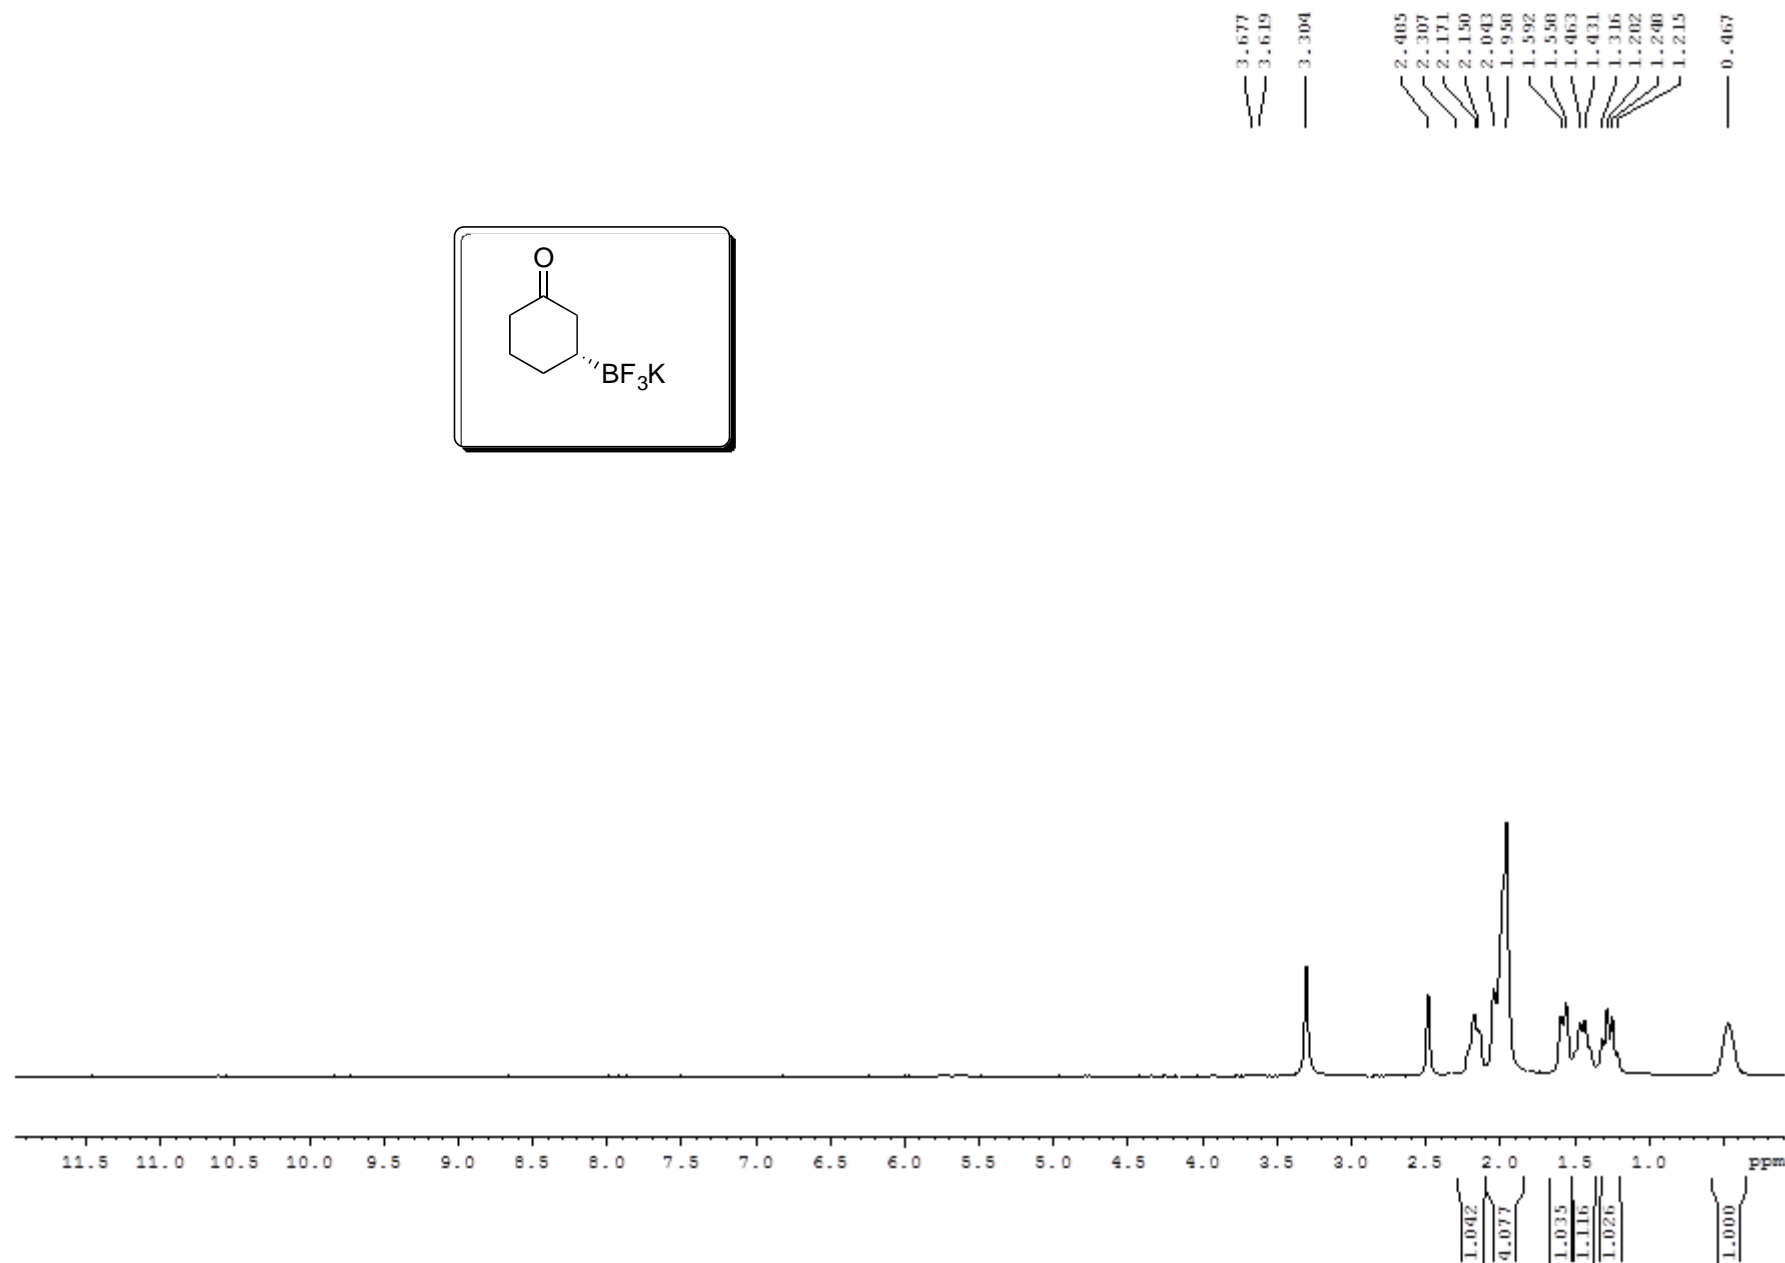

<sup>13</sup>C NMR (DMSO, 90.5 MHz) spectrum of potassium (*R*)-3-(Trifluoroborato)cyclohexanone (**7e**)

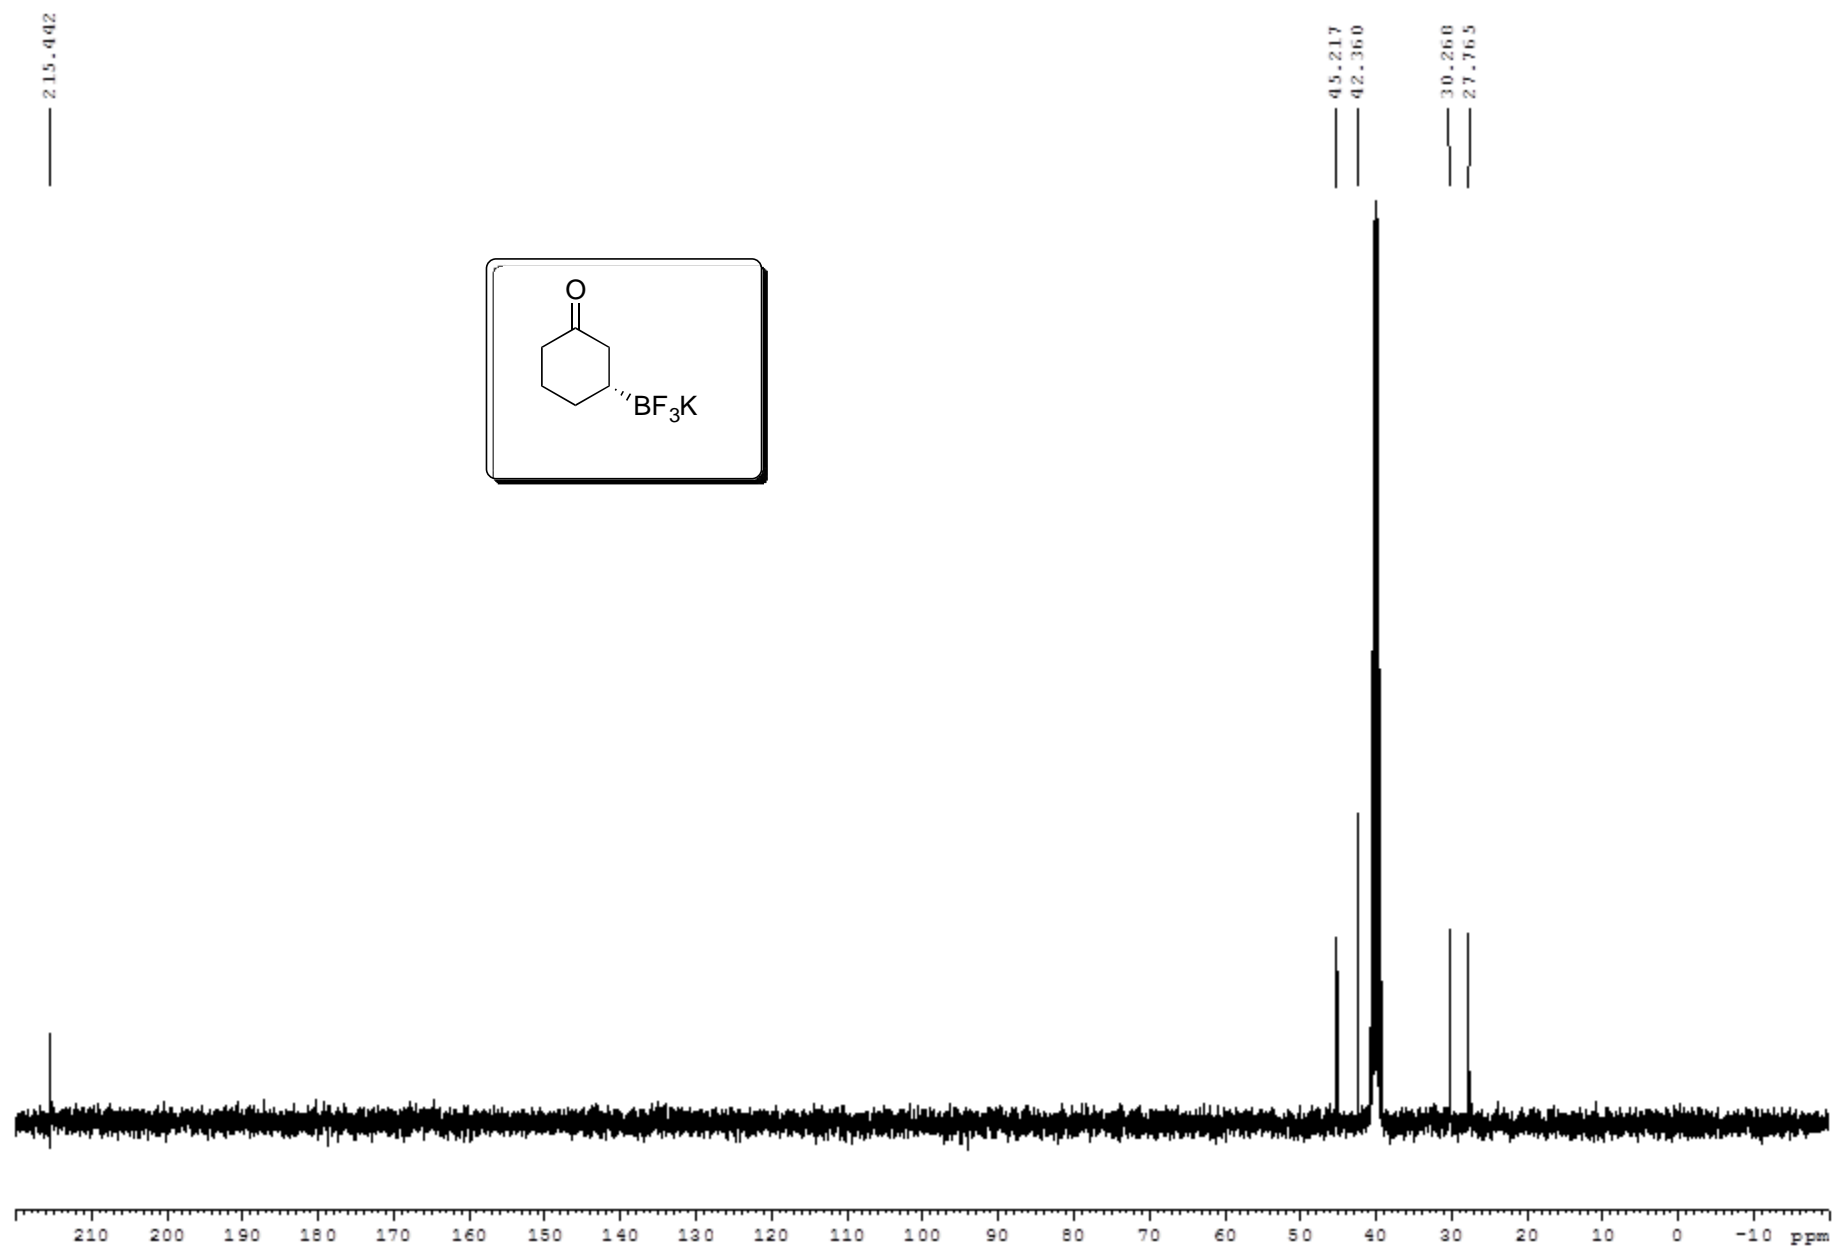



**$^{19}\text{F}$  NMR (DMSO, 338.8 MHz) spectrum of potassium (*R*)-3-(Trifluoroborato)cyclohexanone (7e)**

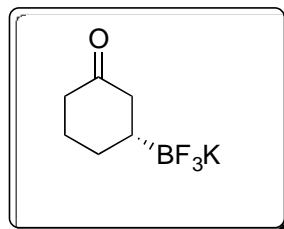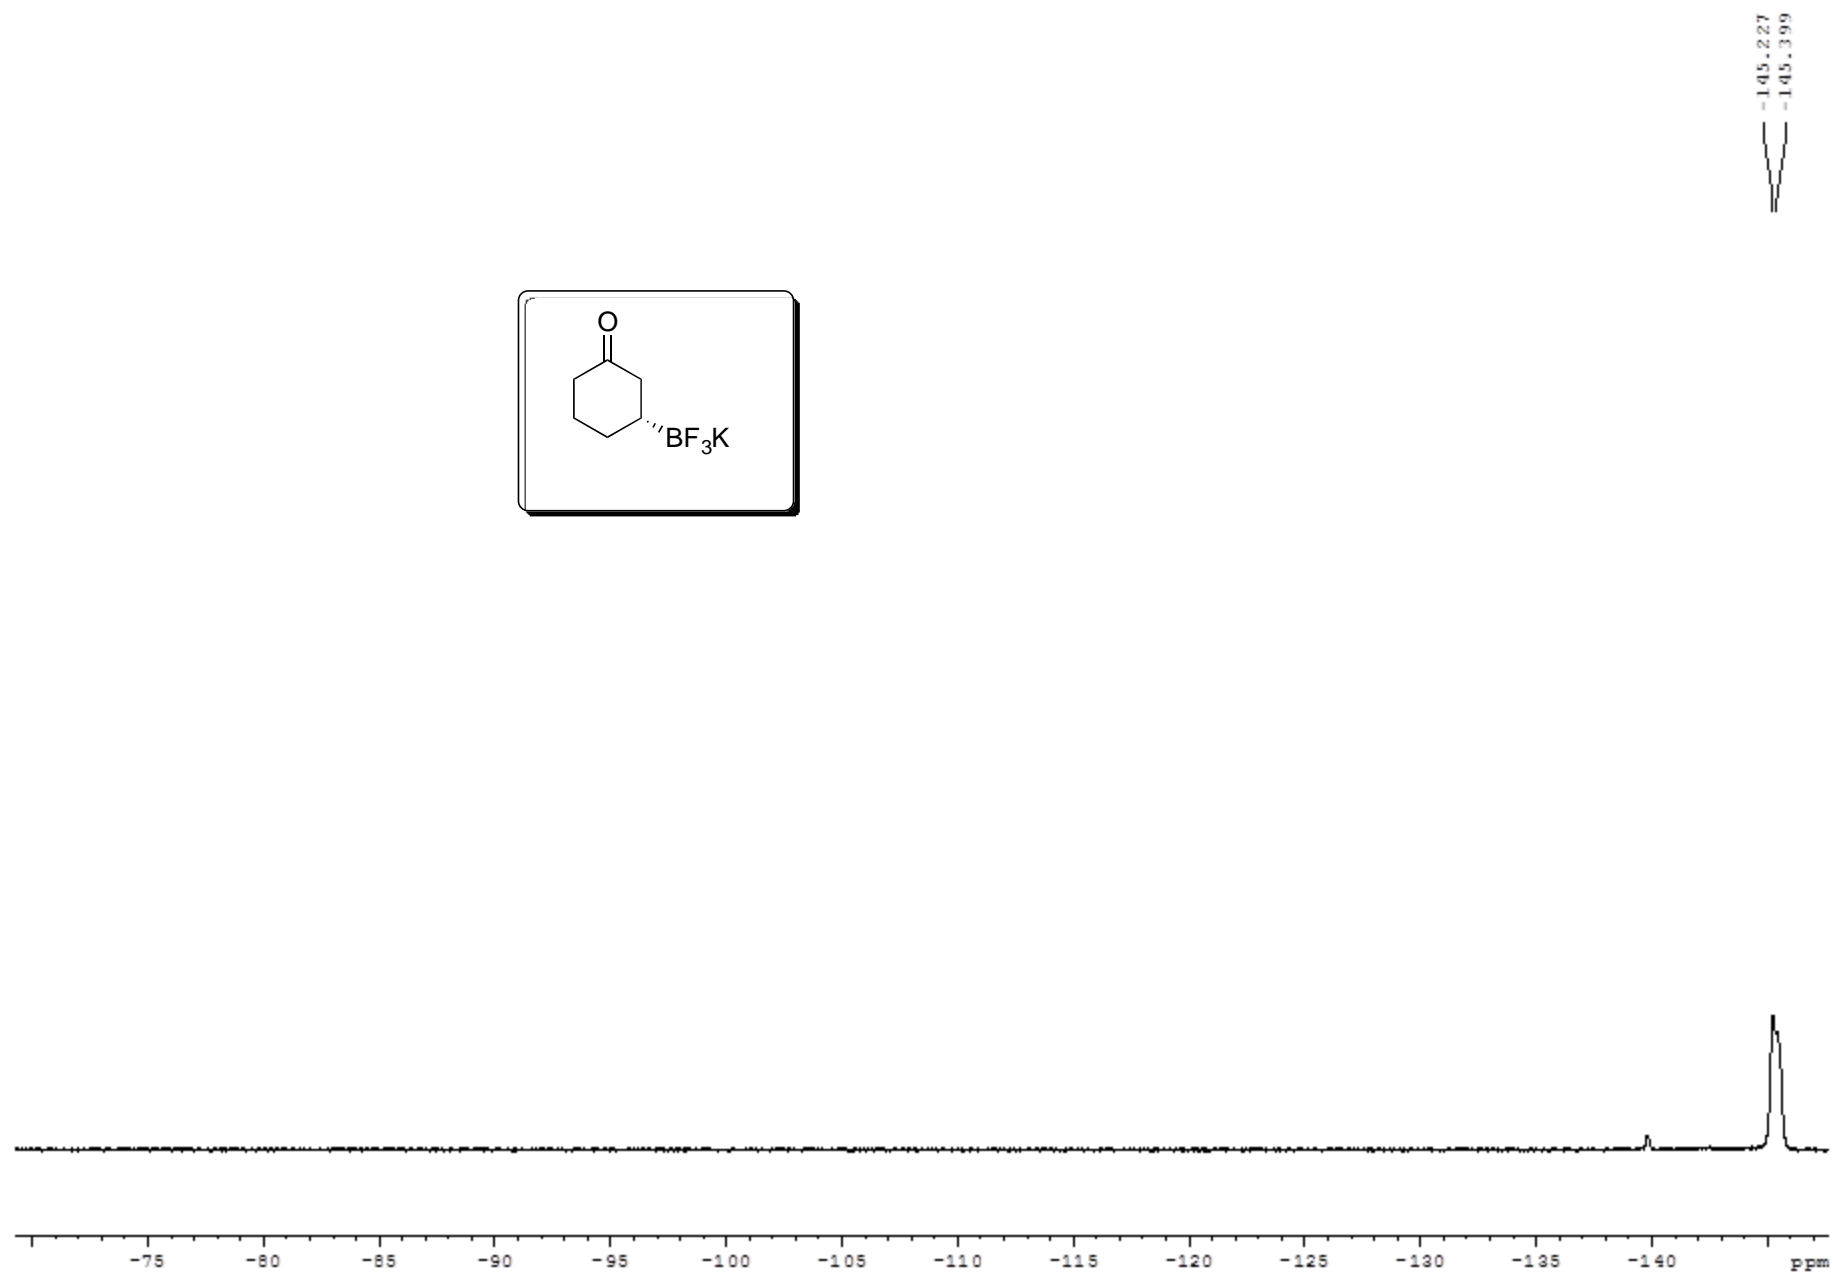

**$^{11}\text{B}$  NMR (Acetone, 128.4 MHz) spectrum of potassium (*R*)-3-(Trifluoroborato)cyclohexanone (7e)**

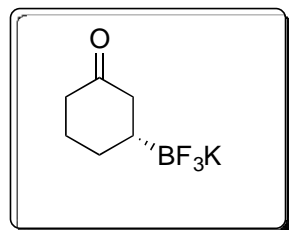

5.269

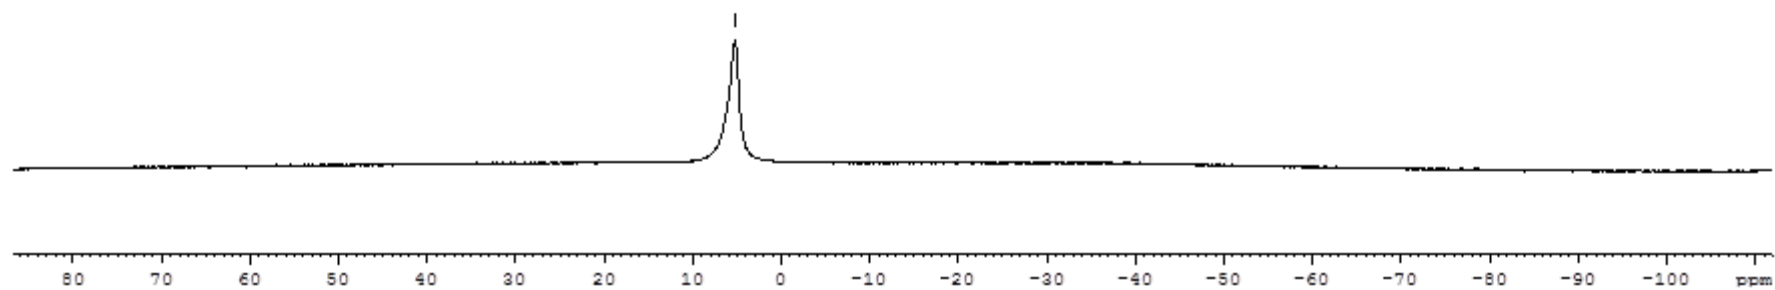

<sup>1</sup>H NMR (CDCl<sub>3</sub>, 300 MHz) spectrum of (*R*)-3-hydroxy-*N*-(4-methoxyphenyl)butanamide (2a-OH)

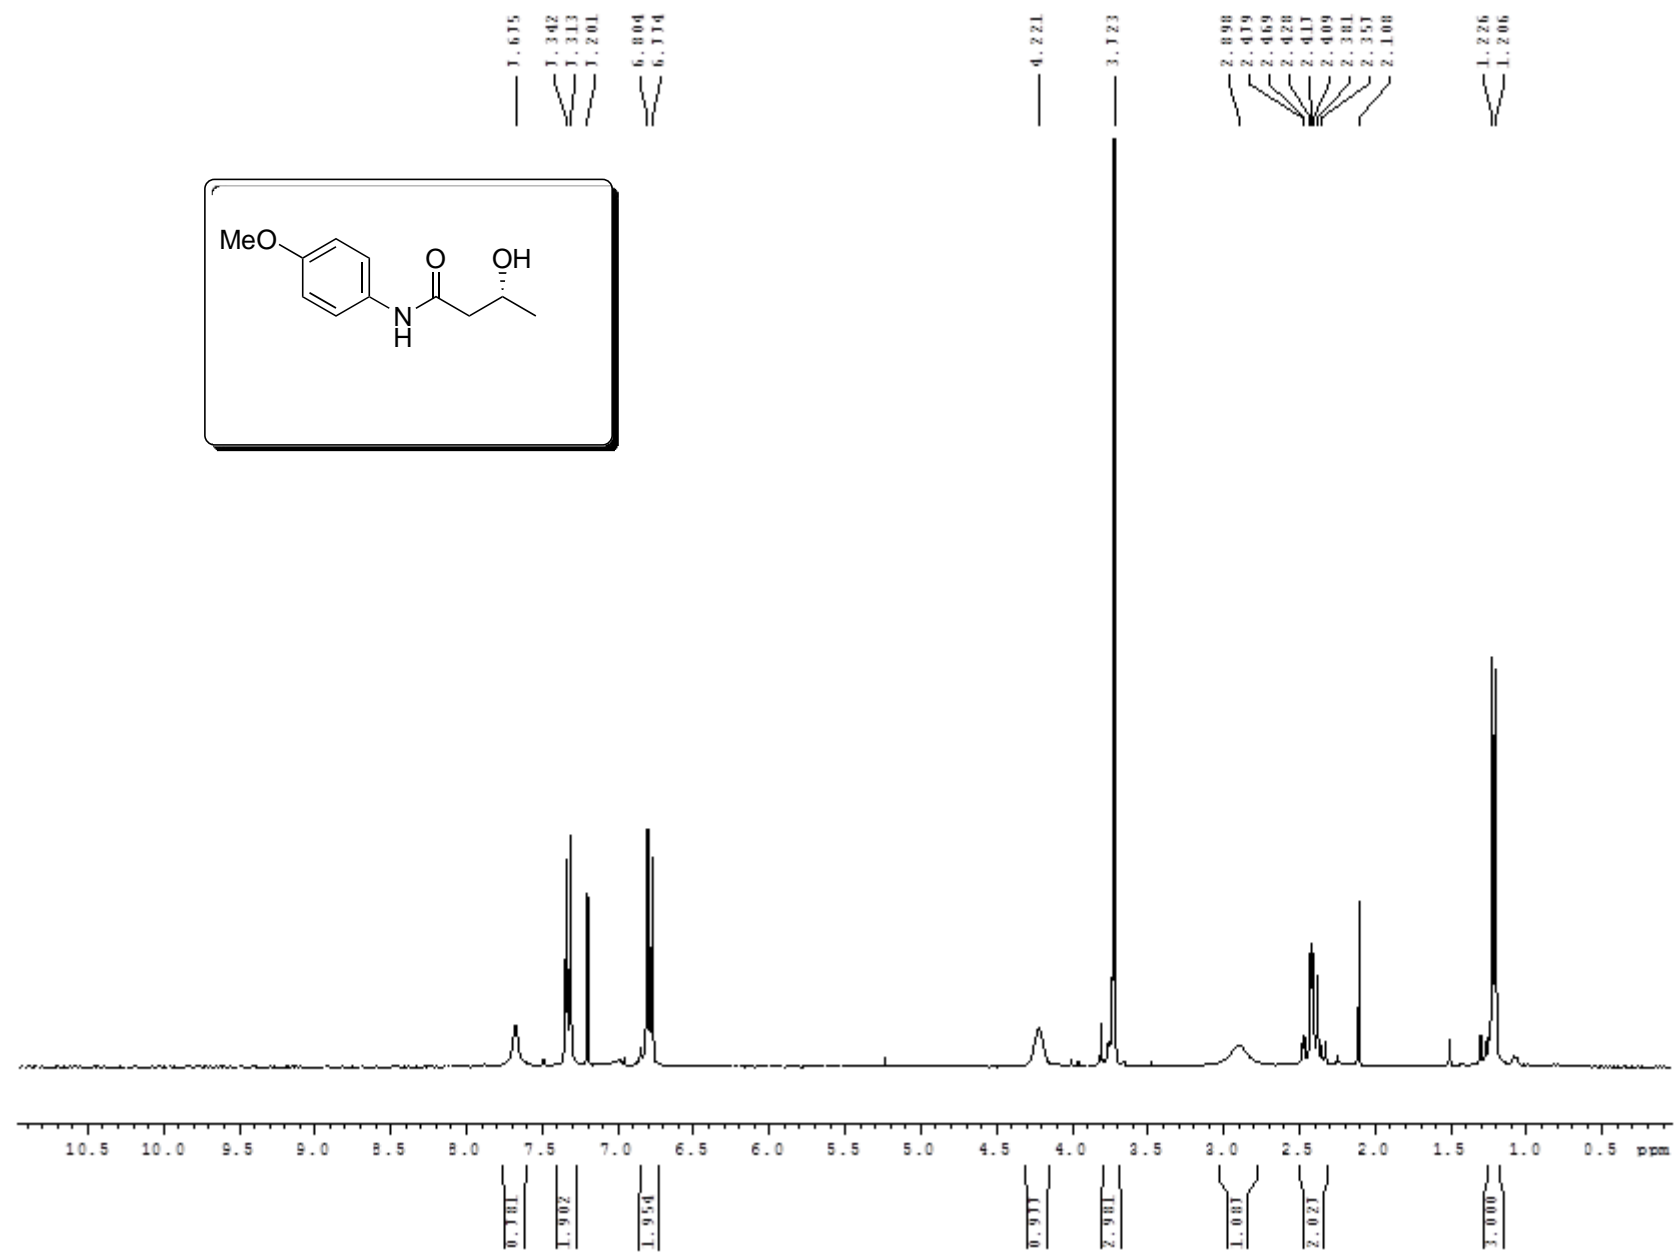

<sup>13</sup>C NMR (CDCl<sub>3</sub>, 125.8 MHz) spectrum of (*R*)-3-hydroxy-*N*-(4-methoxyphenyl)butanamide (2a-OH)

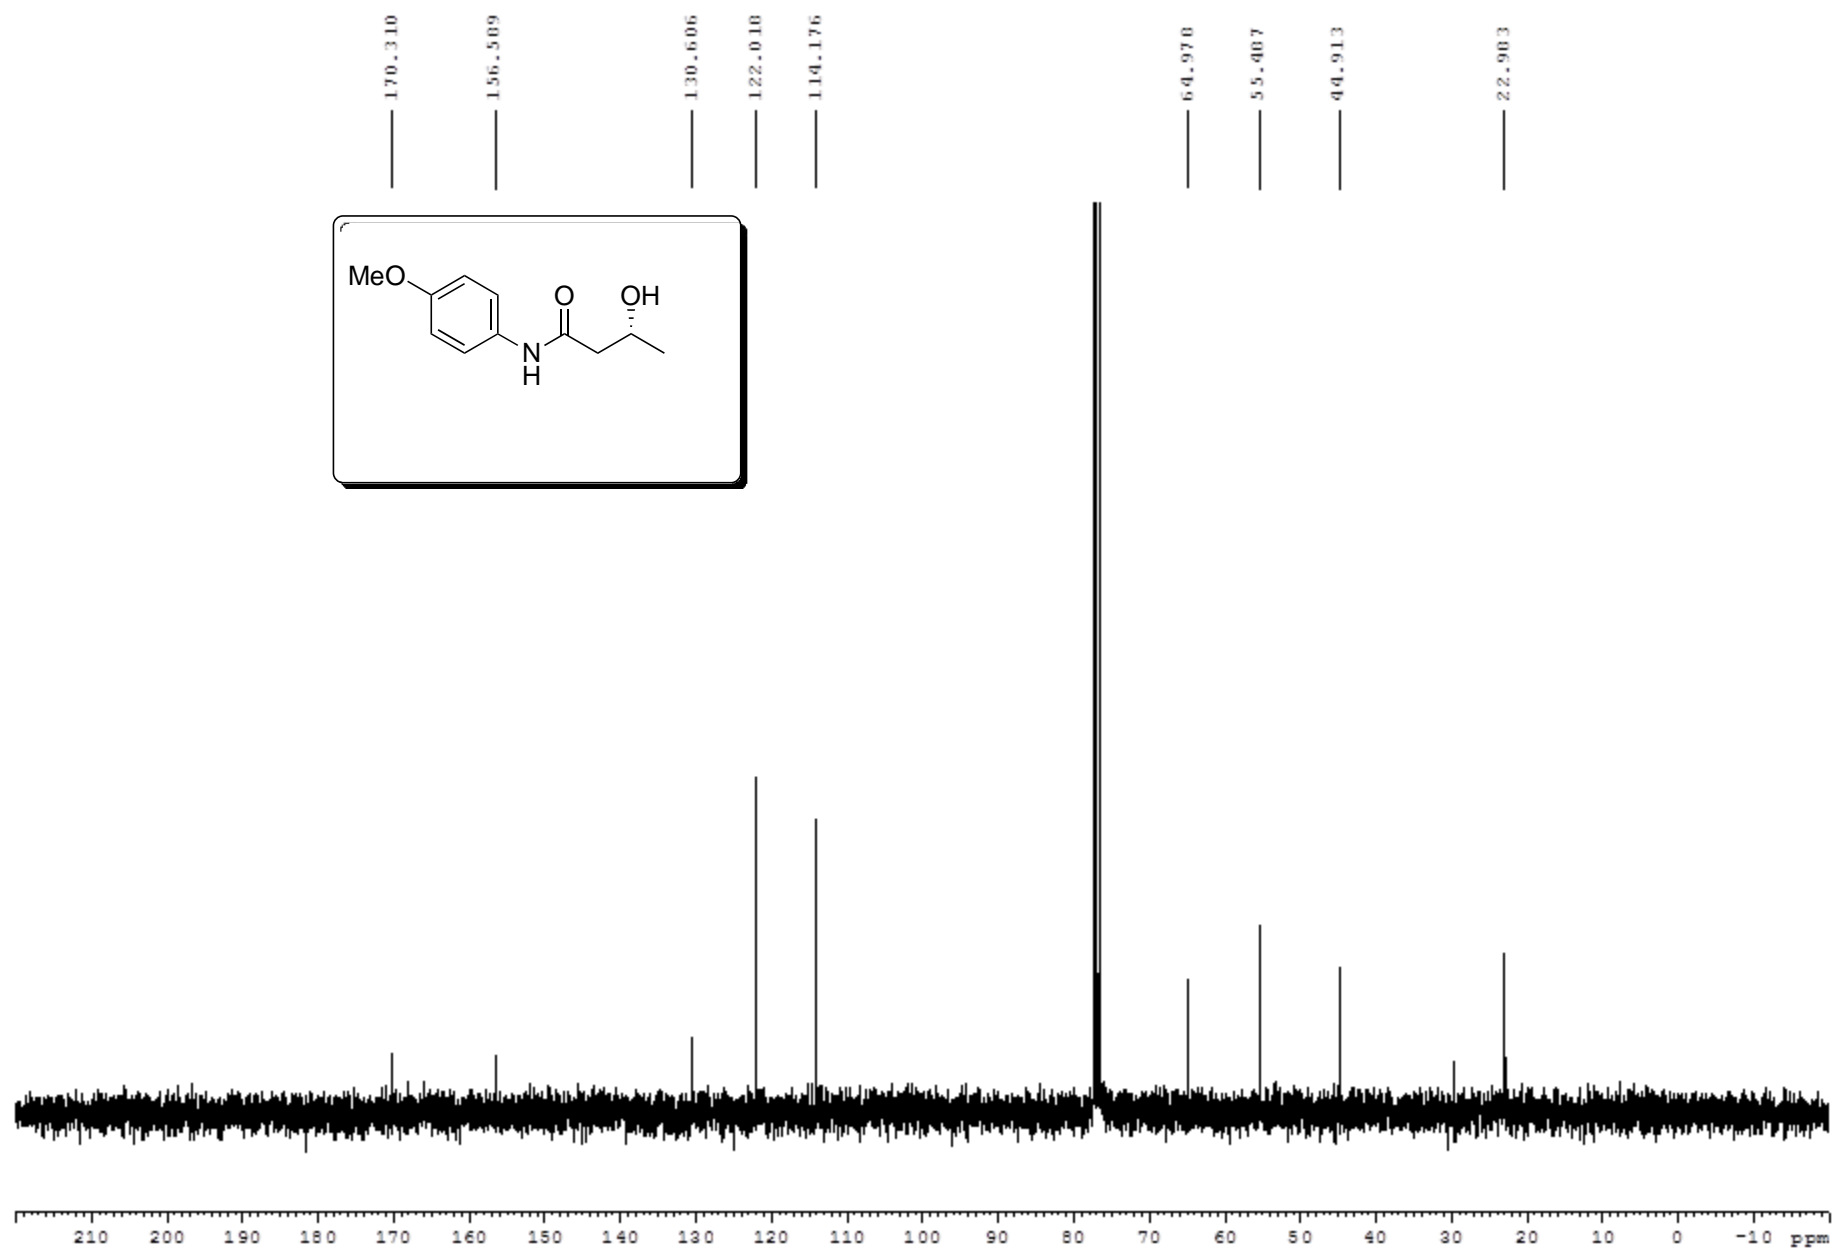

$^1\text{H}$  NMR ( $\text{CDCl}_3$ , 300 MHz) spectrum of (*R*)-3-hydroxy-*N*-(4-methoxyphenyl)octanamide (2b-OH)

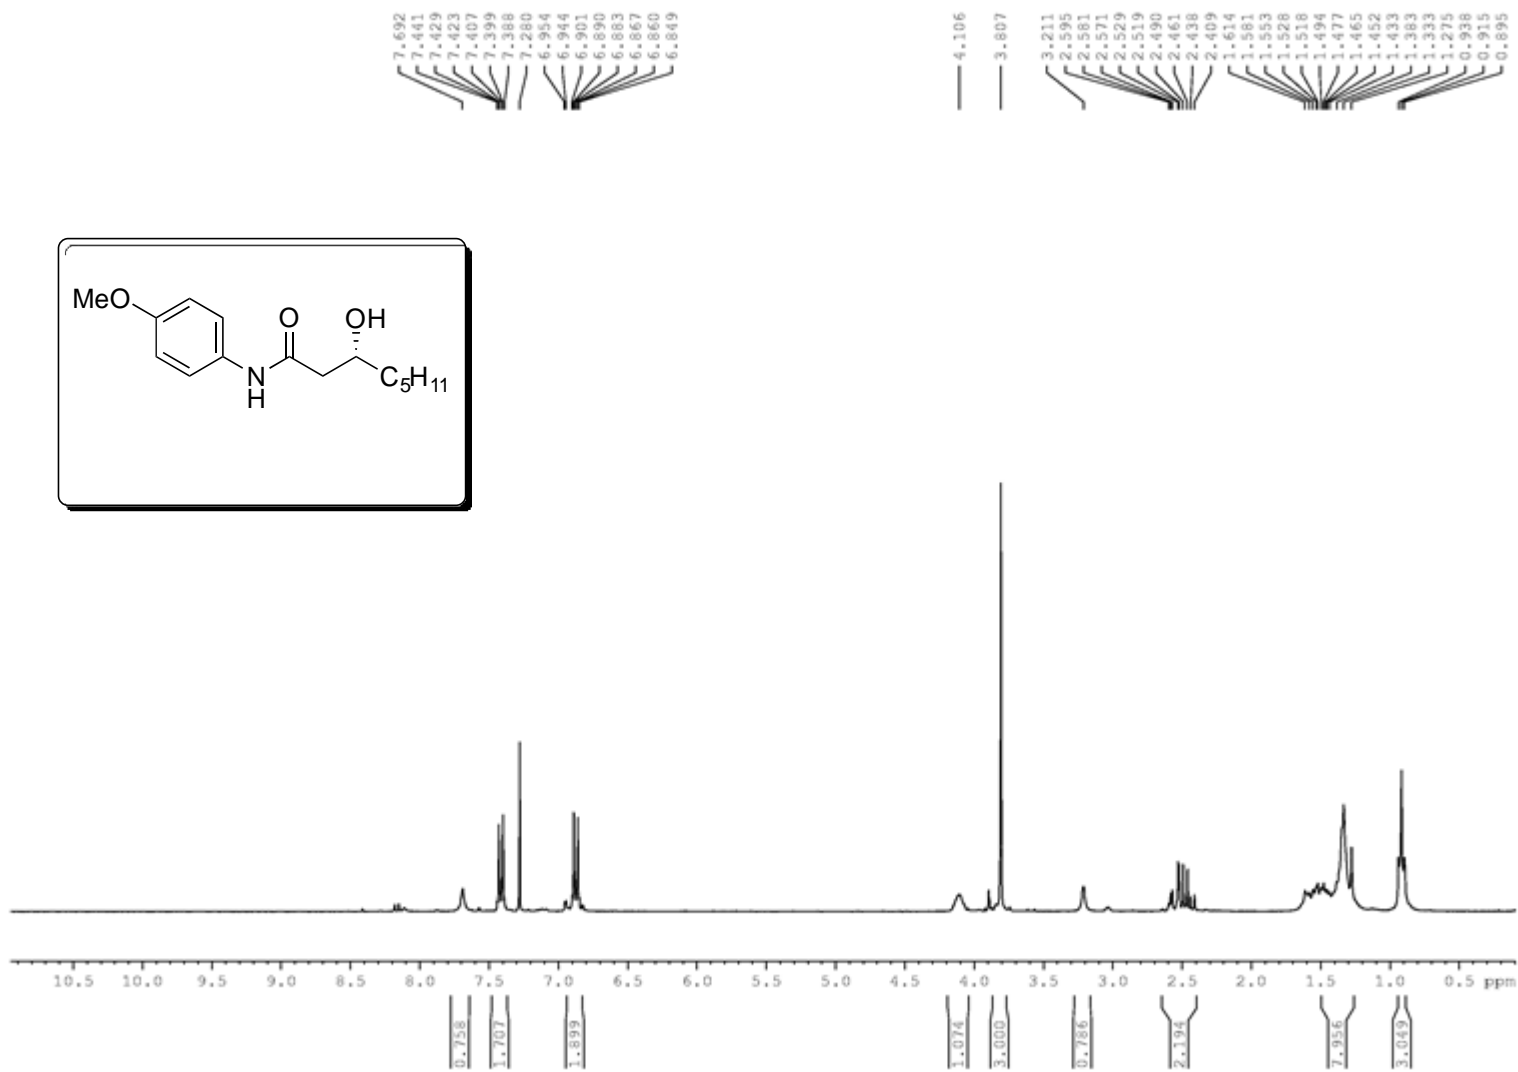

<sup>13</sup>C NMR (CDCl<sub>3</sub>, 125.8 MHz) spectrum of (*R*)- 3-hydroxy-*N*-(4-methoxyphenyl)octanamide (2b-OH)

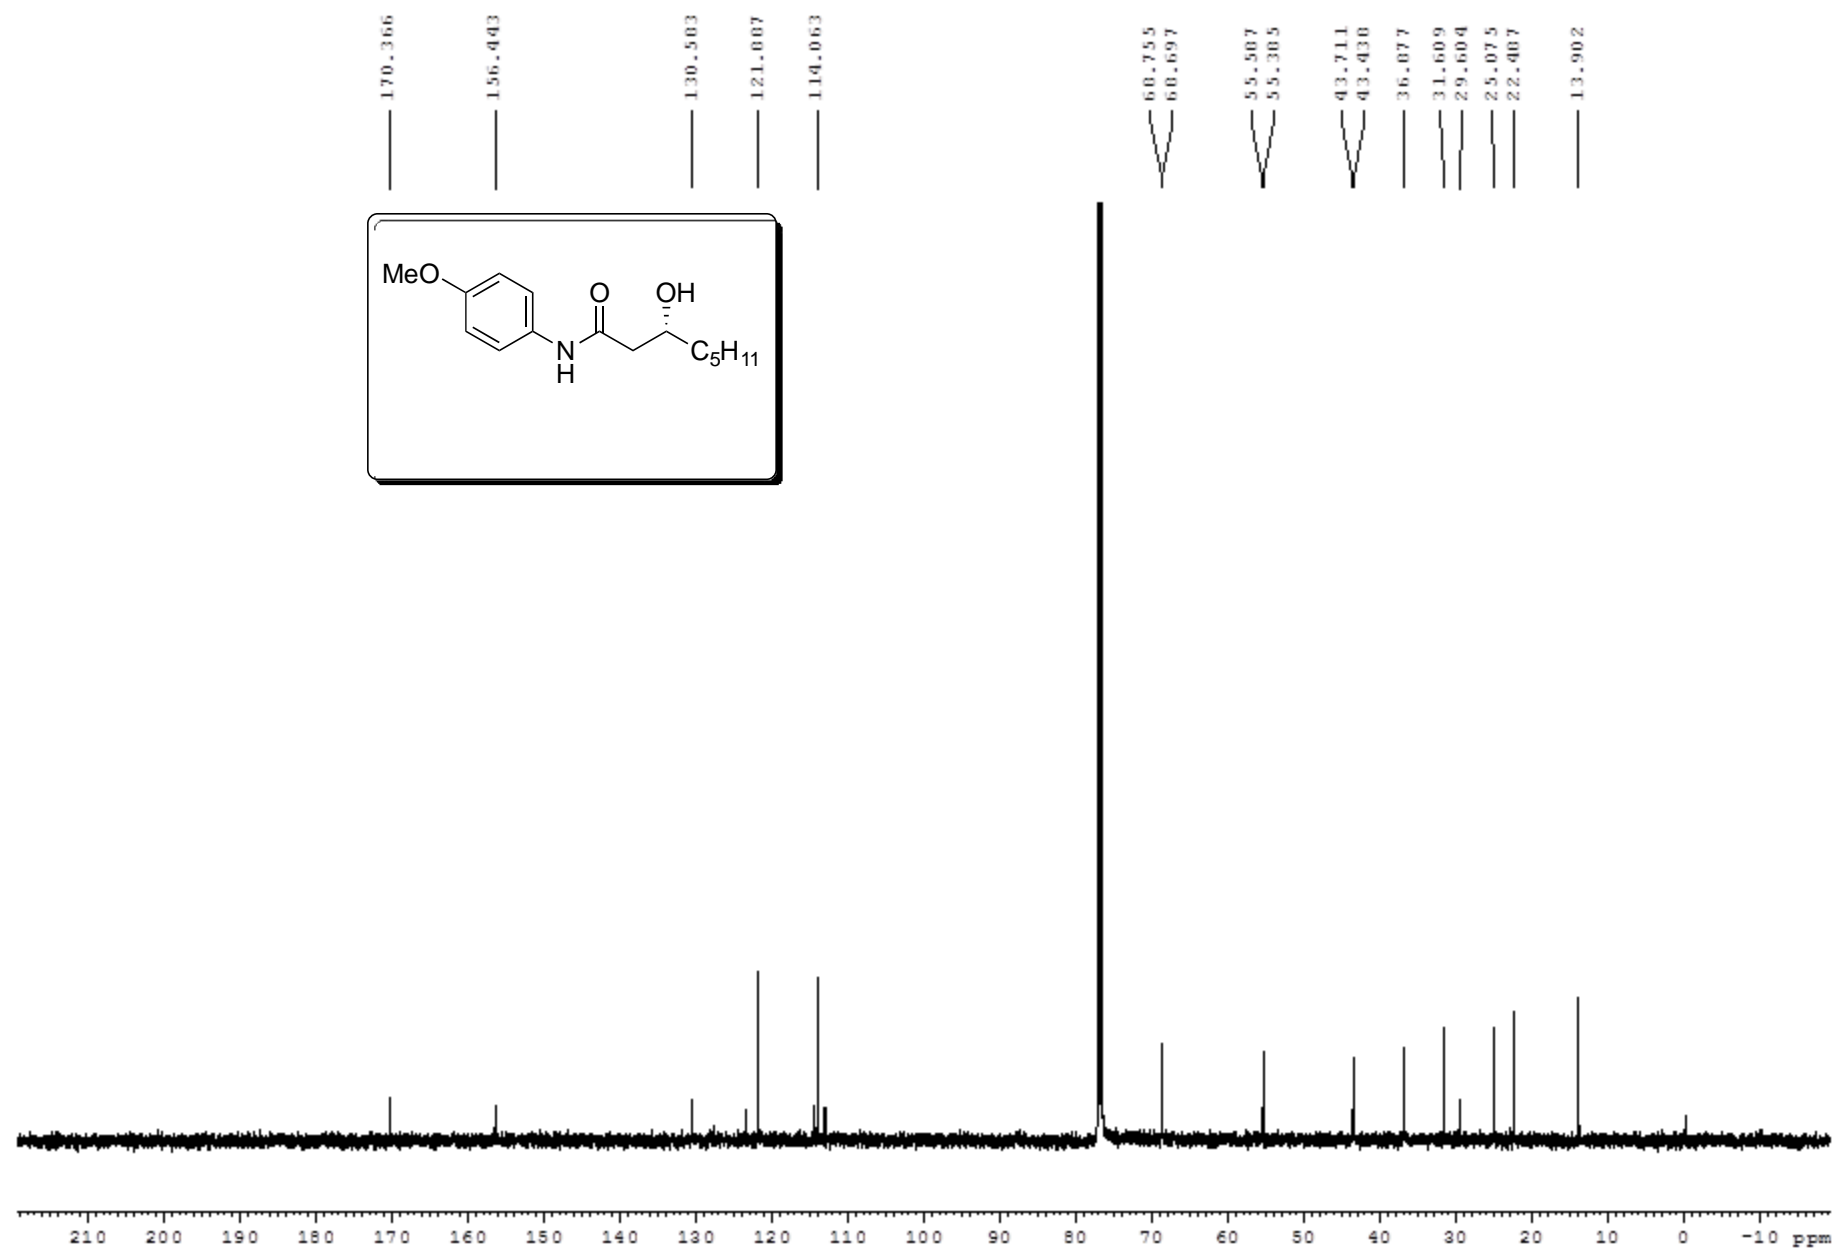

$^1\text{H}$  NMR ( $\text{CDCl}_3$ , 500 MHz) spectrum of (*R*)-3-Hydroxy-*N*-phenylbutanamide (2c-OH)

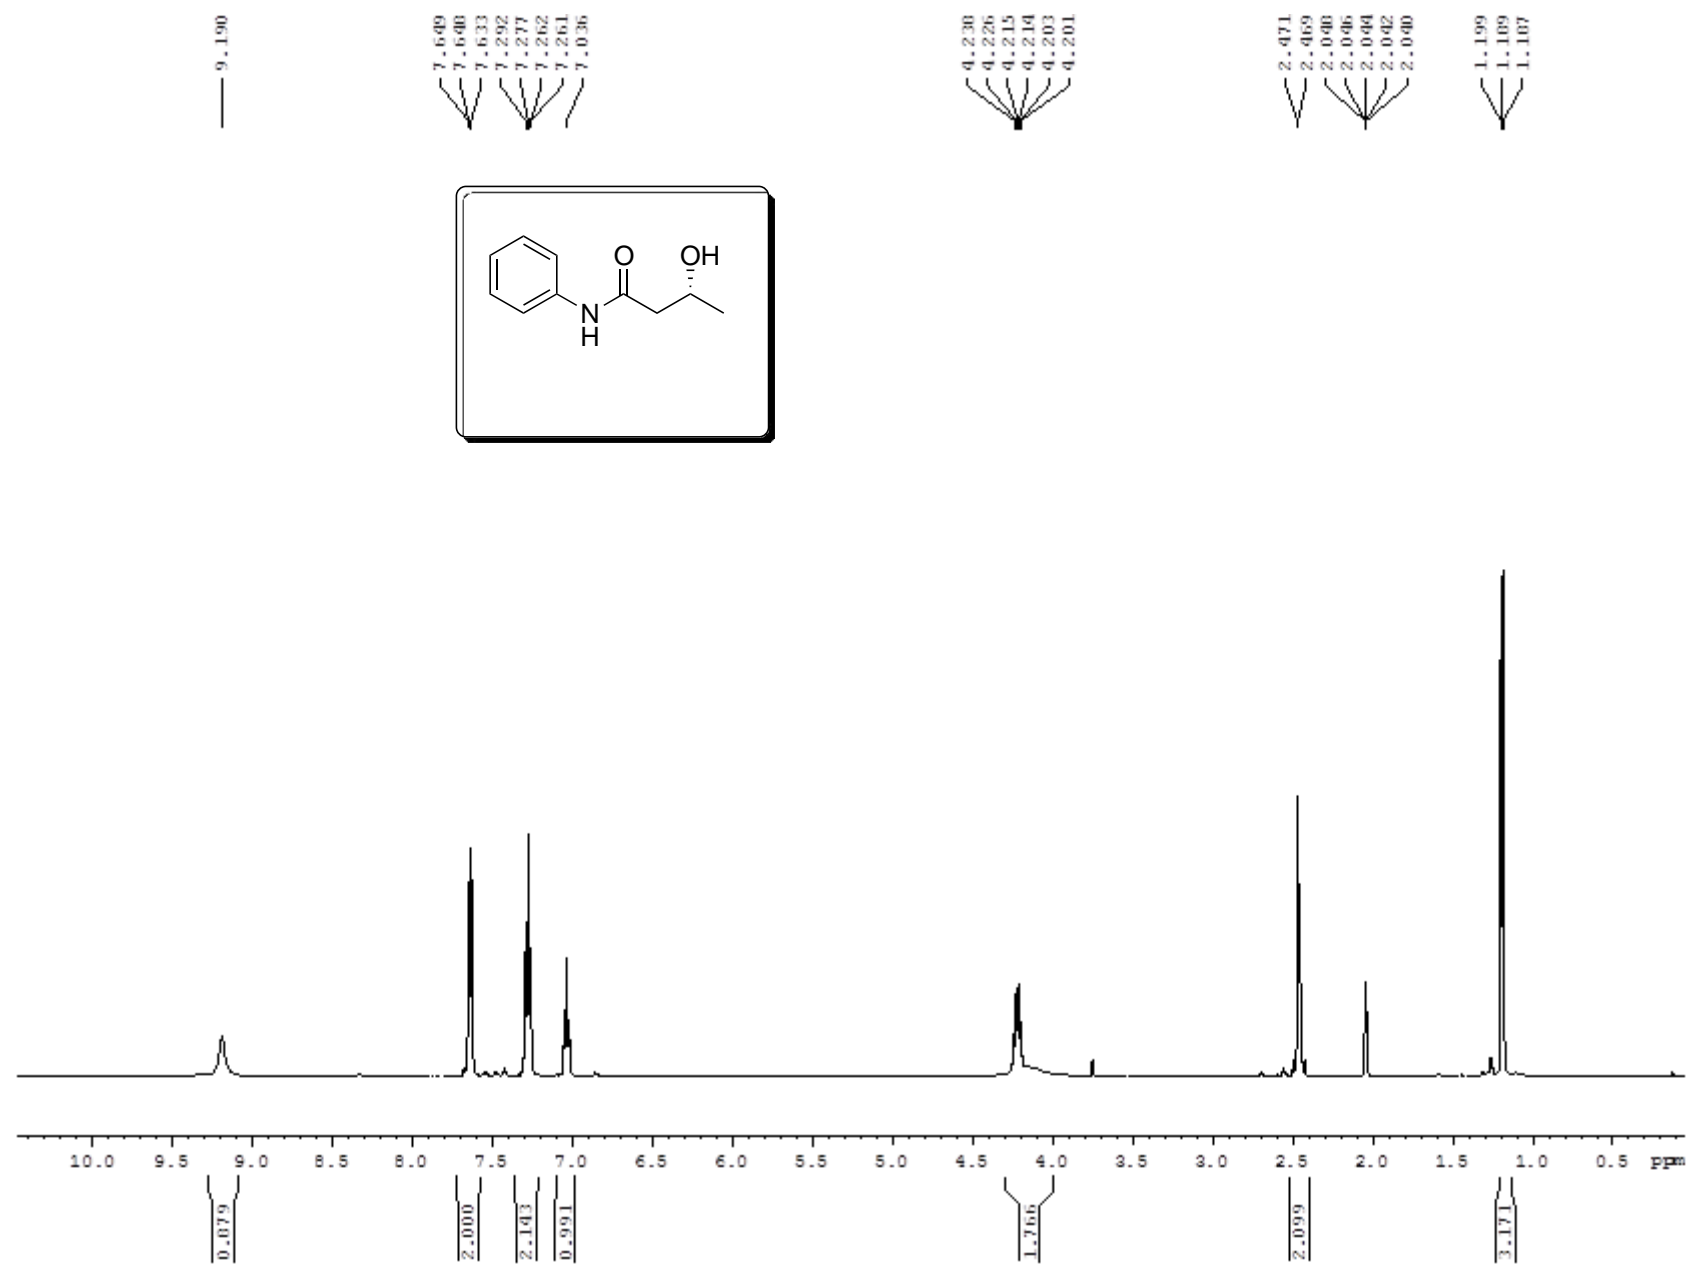

<sup>13</sup>C NMR (CDCl<sub>3</sub>, 125.8 MHz) spectrum of (*R*)-3-Hydroxy-*N*-phenylbutanamide (2c-OH)

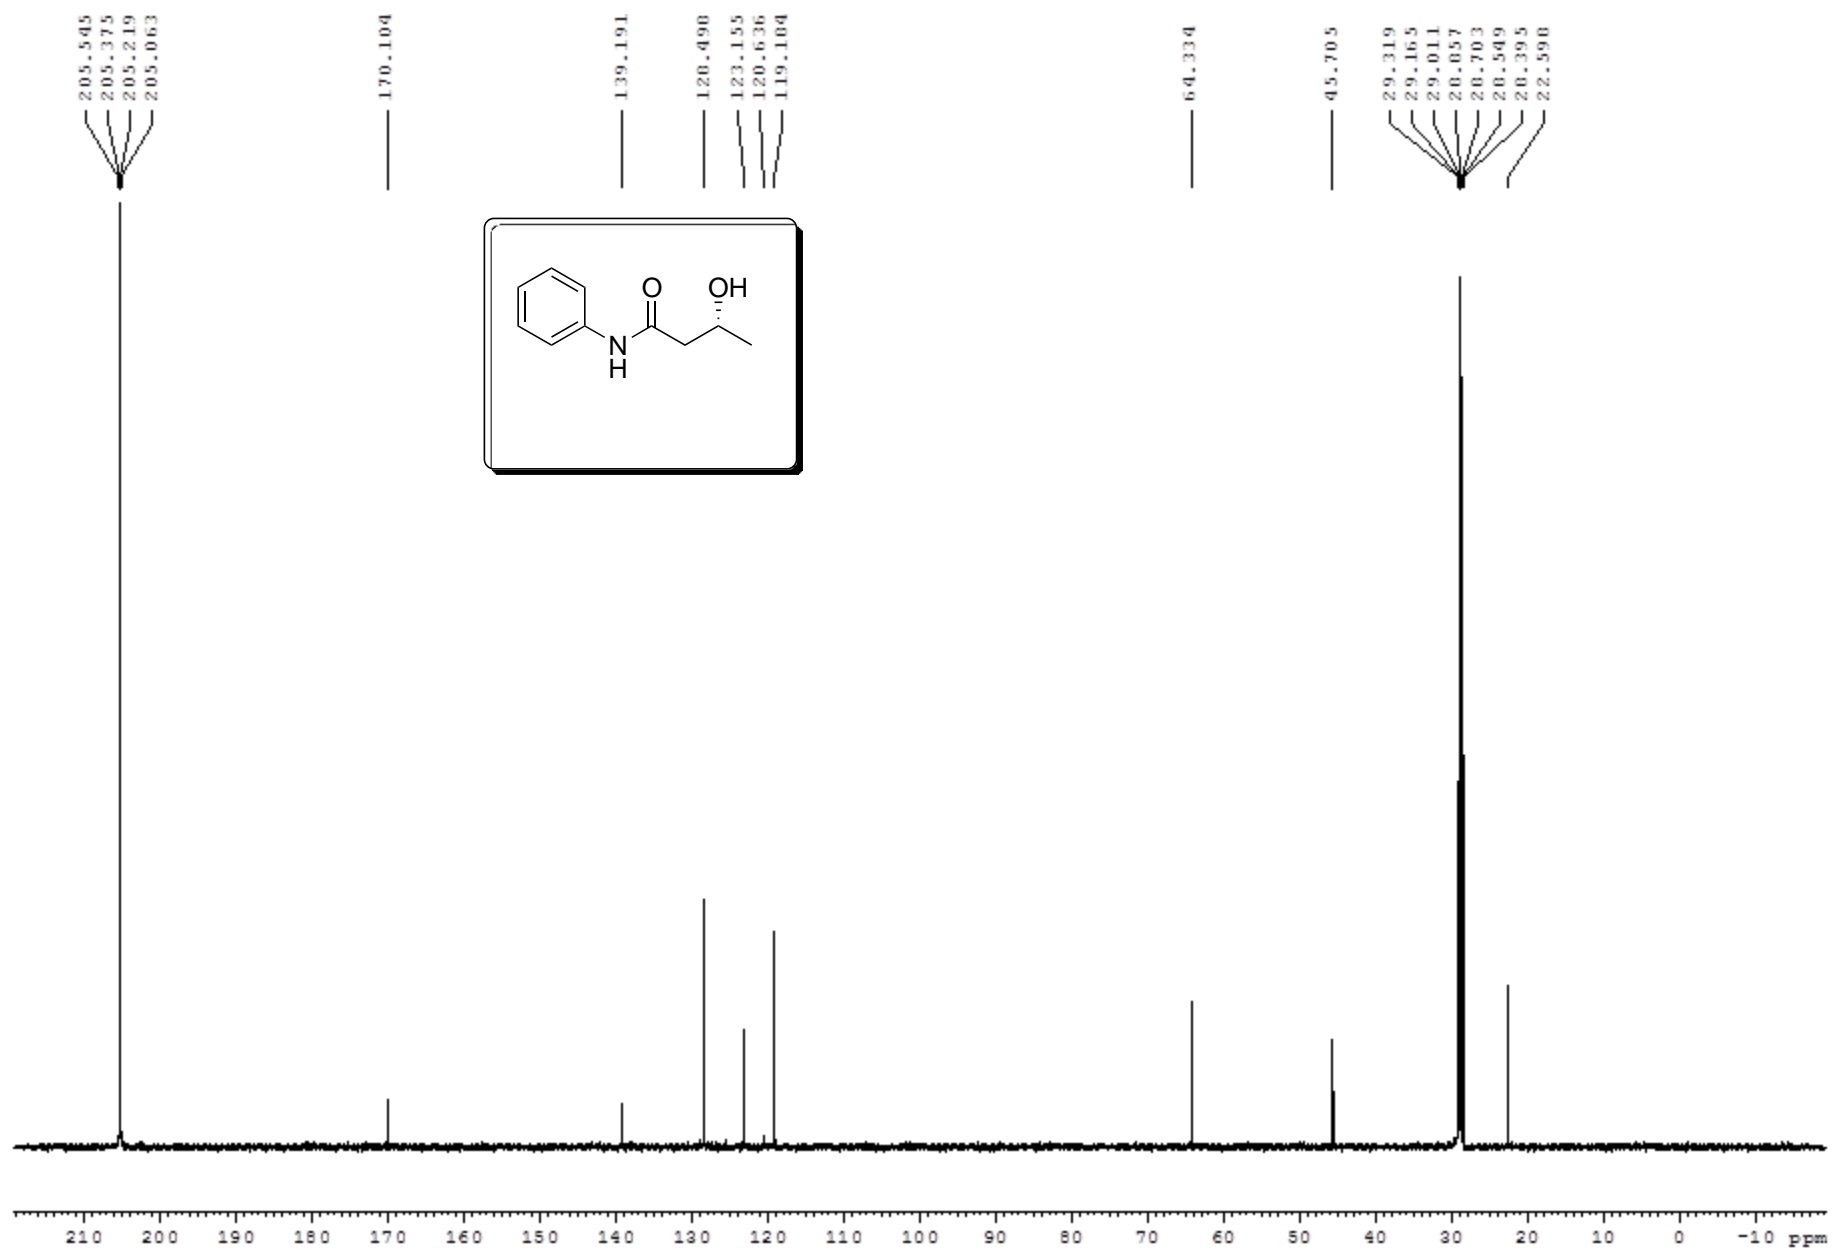



<sup>1</sup>H NMR (CDCl<sub>3</sub>, 300 MHz) spectrum of (*R*)-*N*-cyclohexyl-3-hydroxybutanamide (2d-OH)

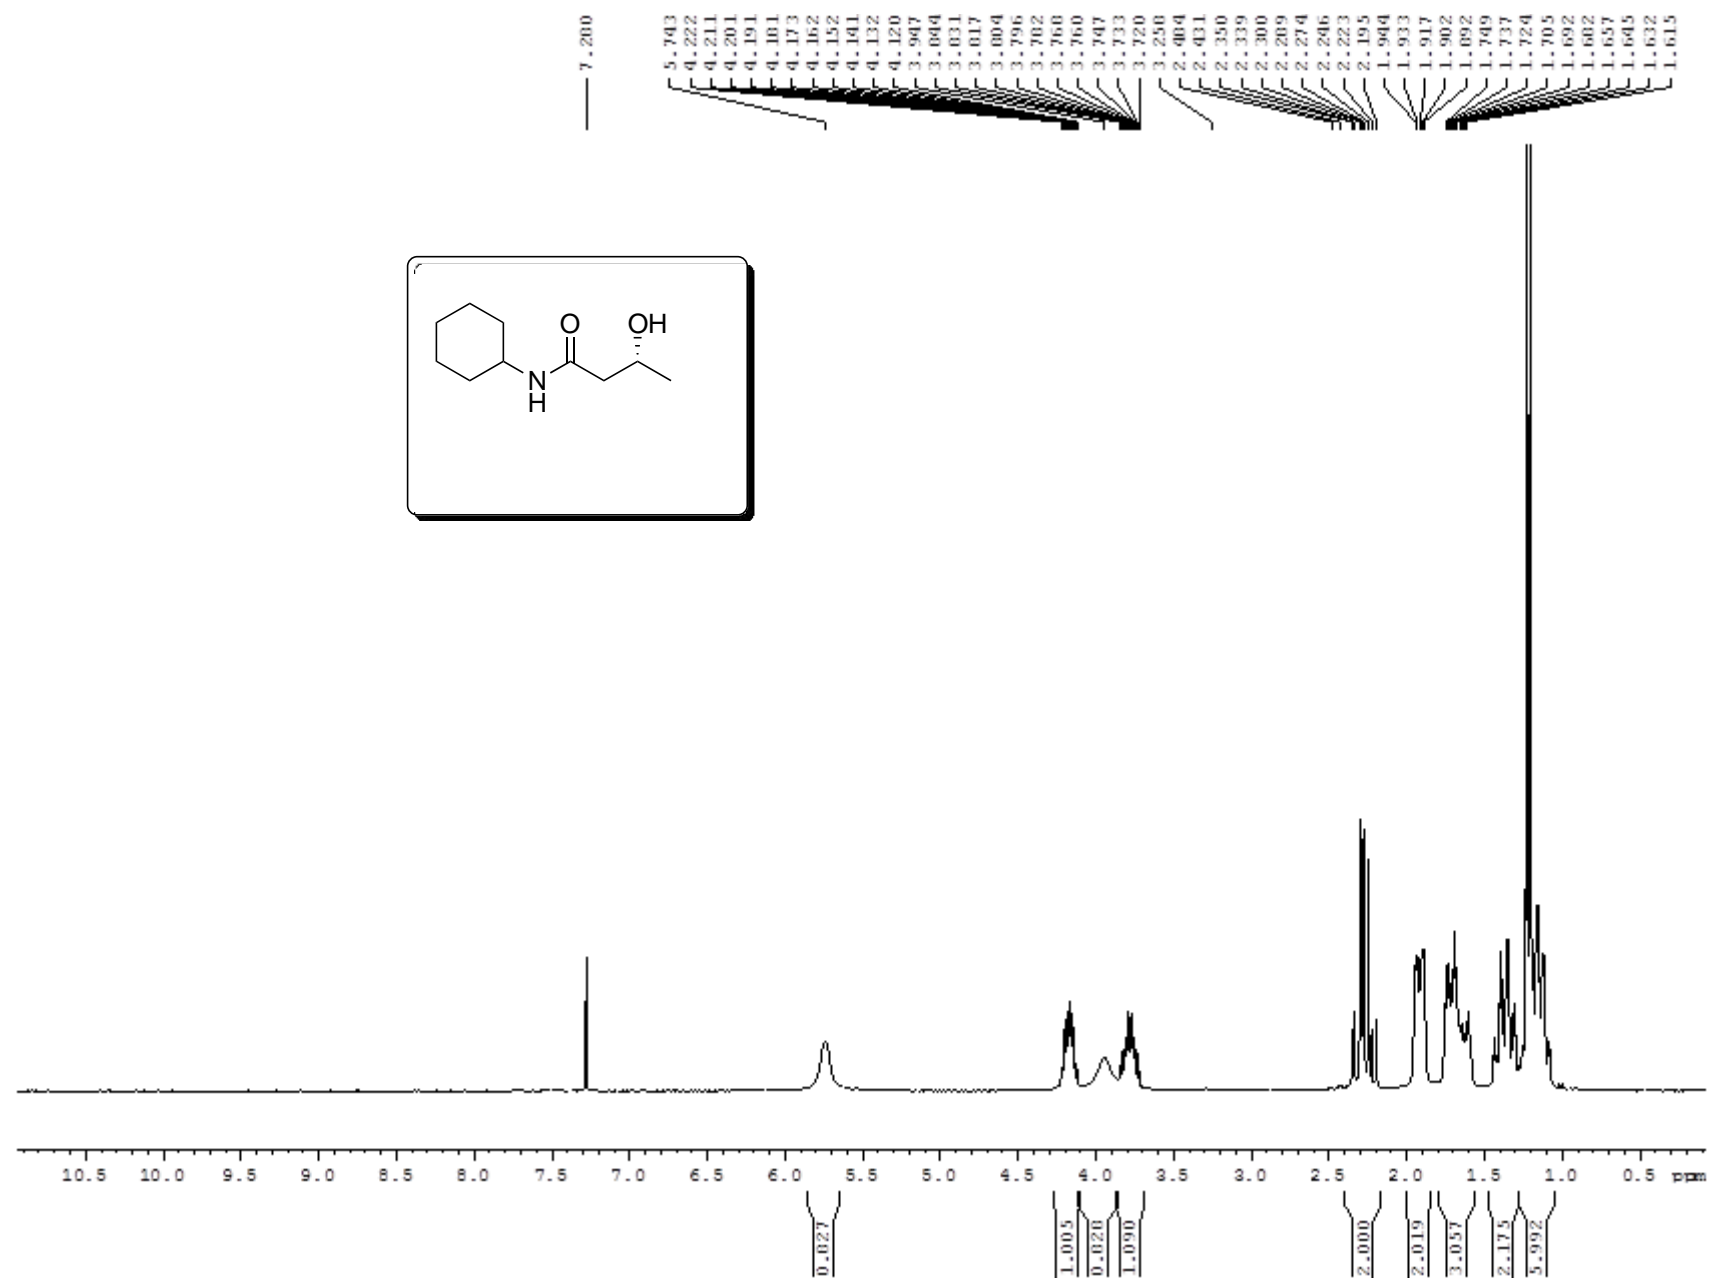

<sup>13</sup>C NMR (CDCl<sub>3</sub>, 75.4 MHz) spectrum of ((*R*)-*N*-cyclohexyl-3-hydroxybutanamide (2d-OH)

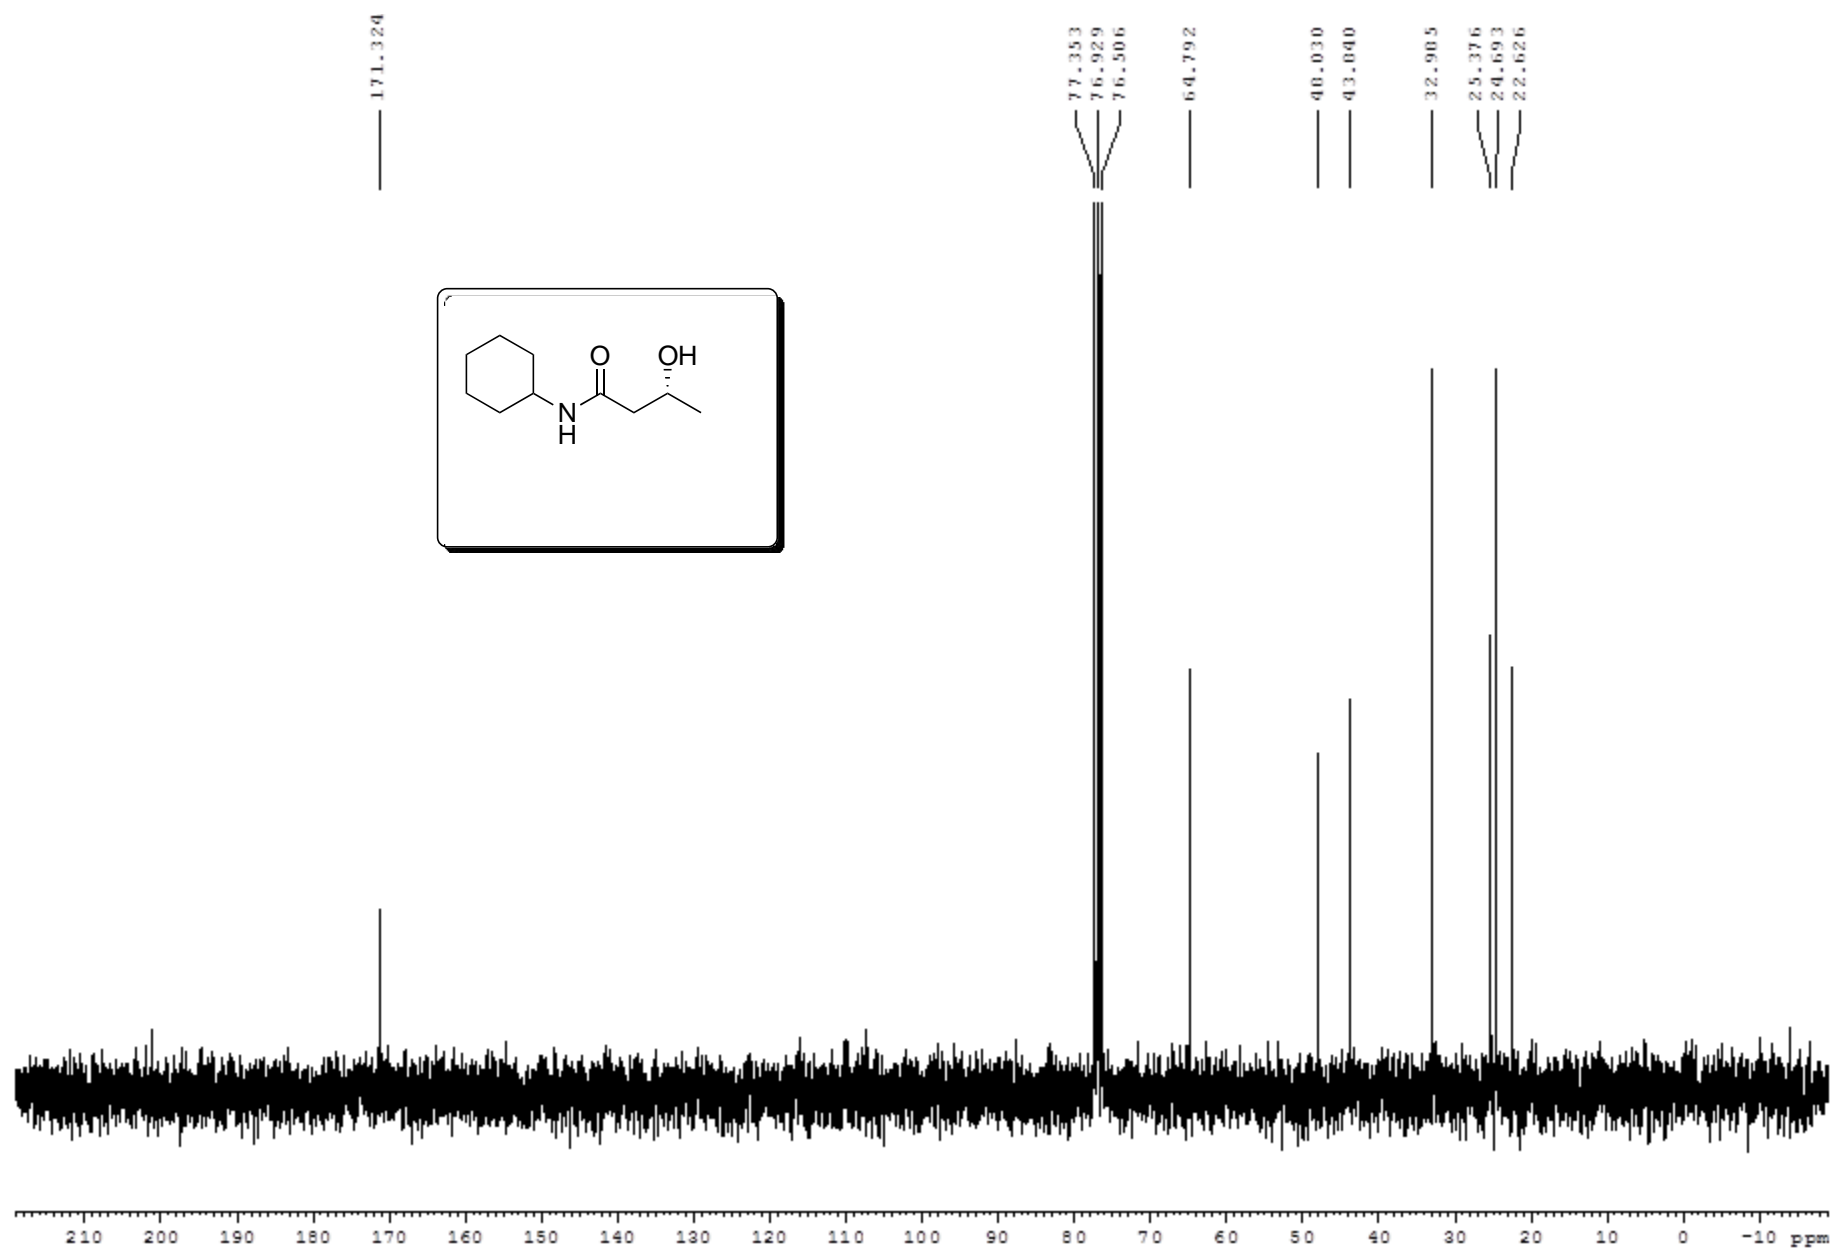

<sup>1</sup>H NMR (CDCl<sub>3</sub>, 500 MHz) spectrum of (*R*)-*N*-Cyclopropyl-3-hydroxyoctanamide (2e-OH)

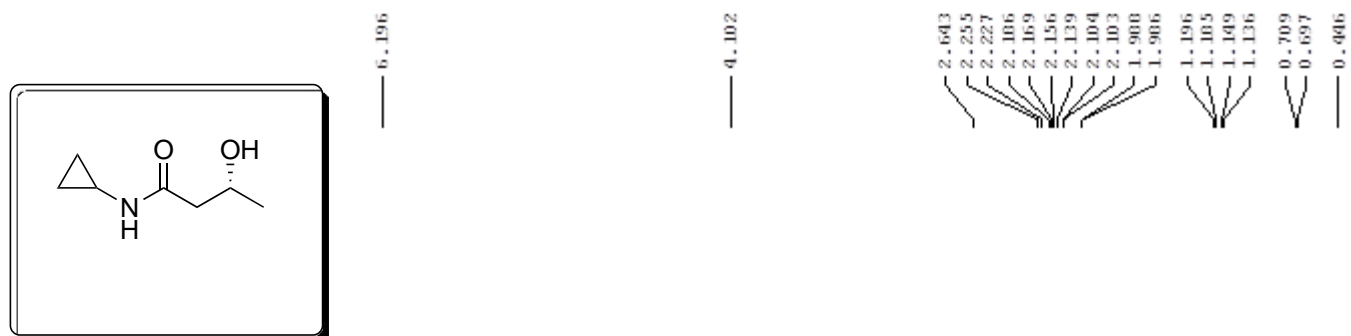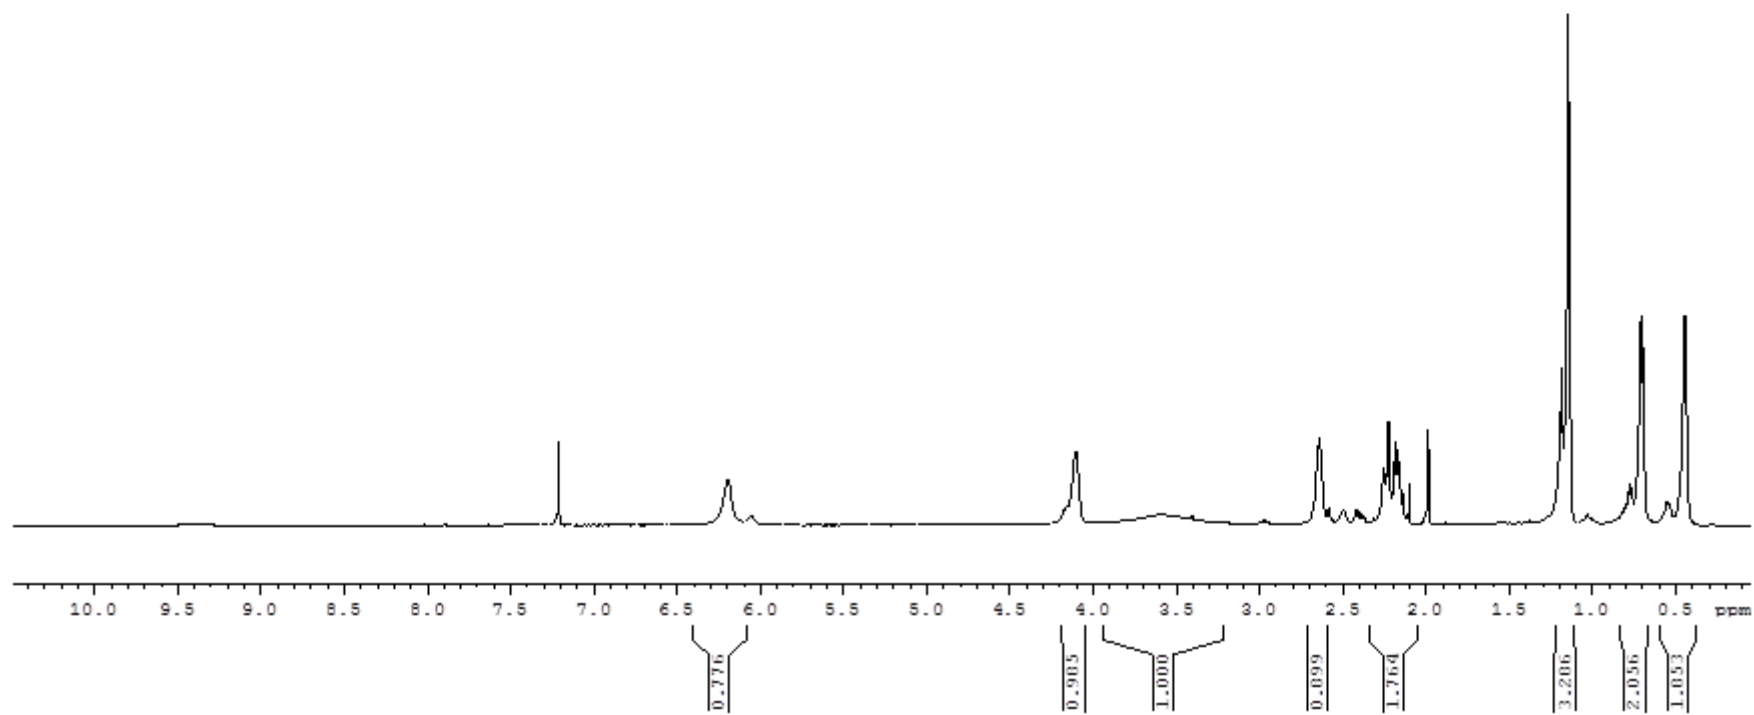

<sup>13</sup>C NMR (CDCl<sub>3</sub>, 125.8 MHz) spectrum of (*R*)-*N*-Cyclopropyl-3-hydroxyoctanamide (2e-OH)

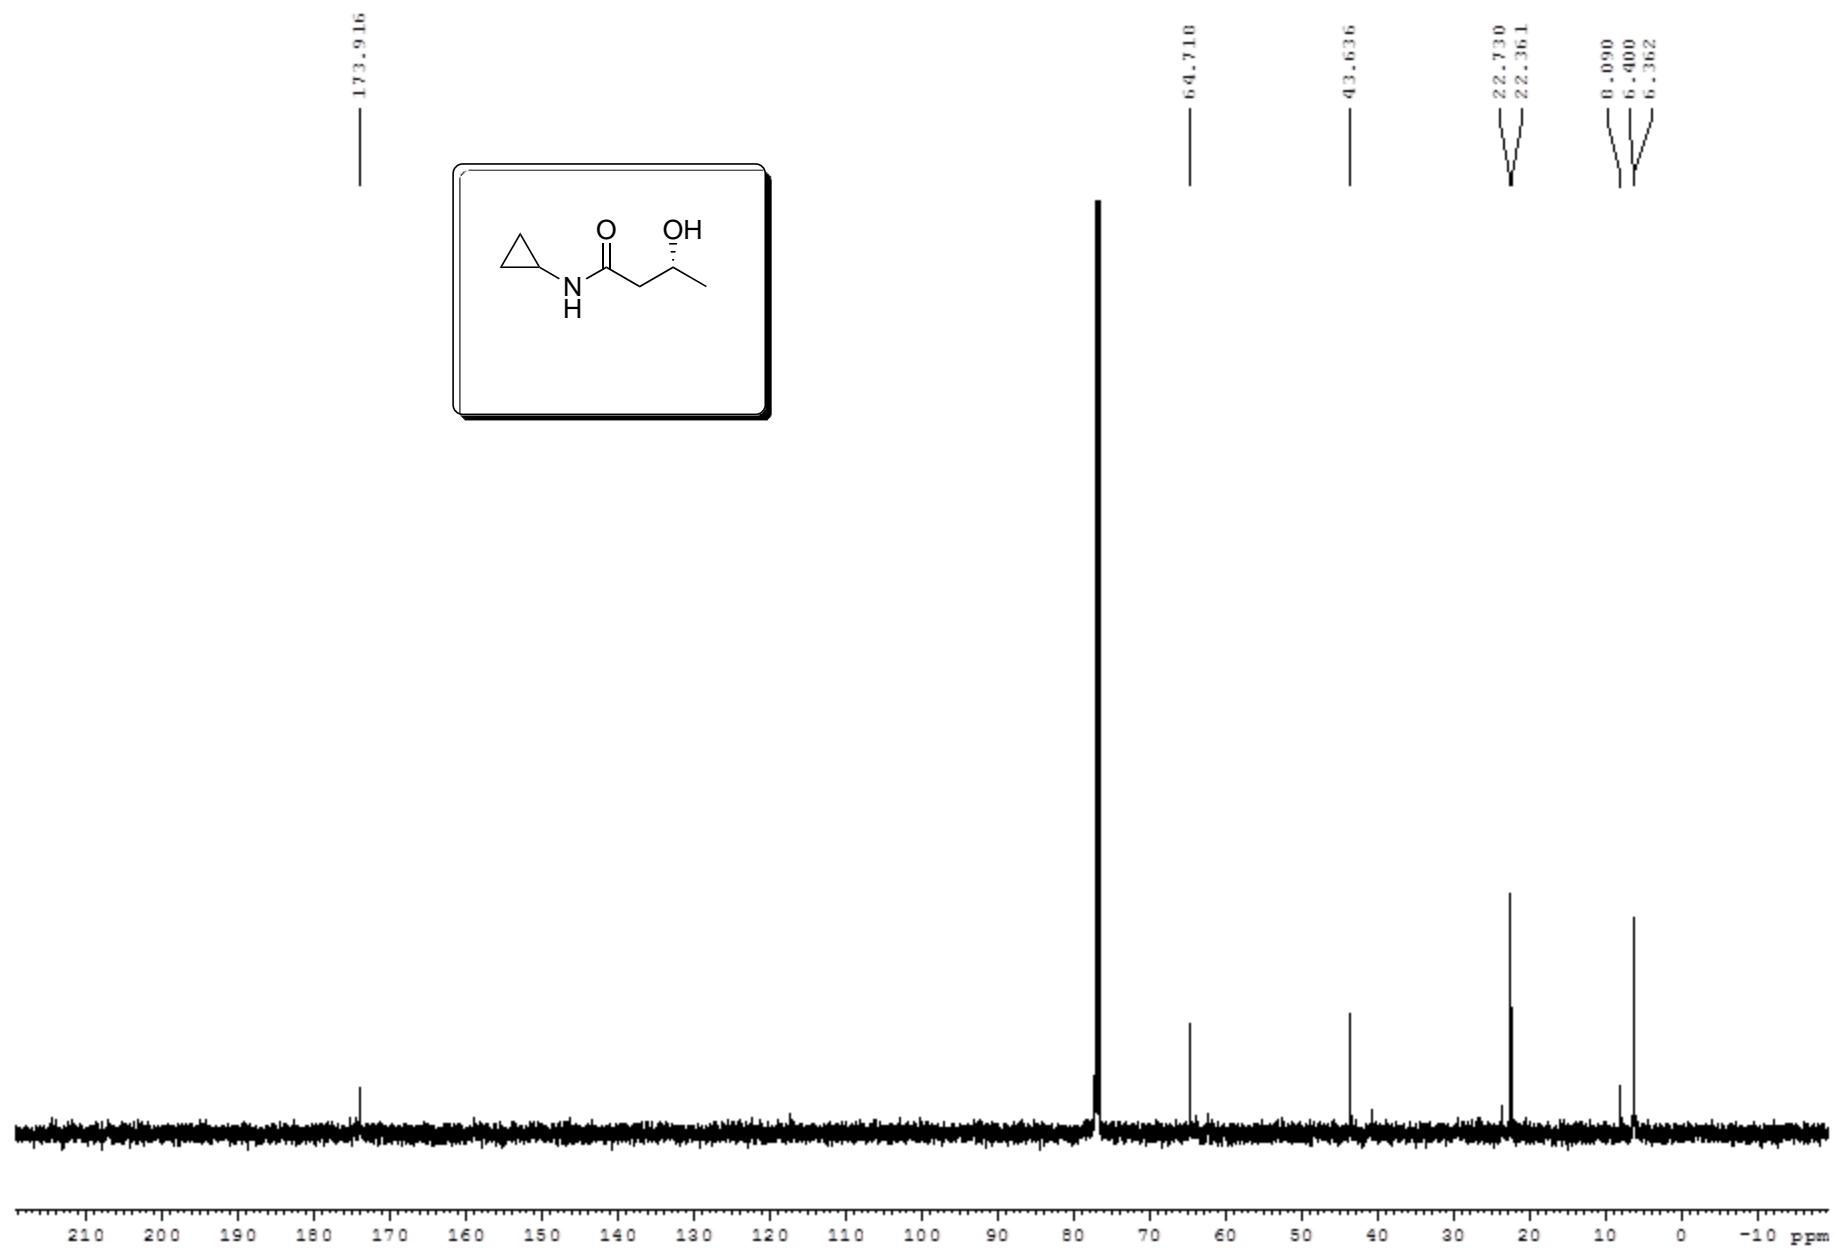

<sup>1</sup>H NMR (CDCl<sub>3</sub>, 300 MHz) spectrum of (*R*)-*N*-cyclohexyl-3-hydroxypentanamide (2f-OH)

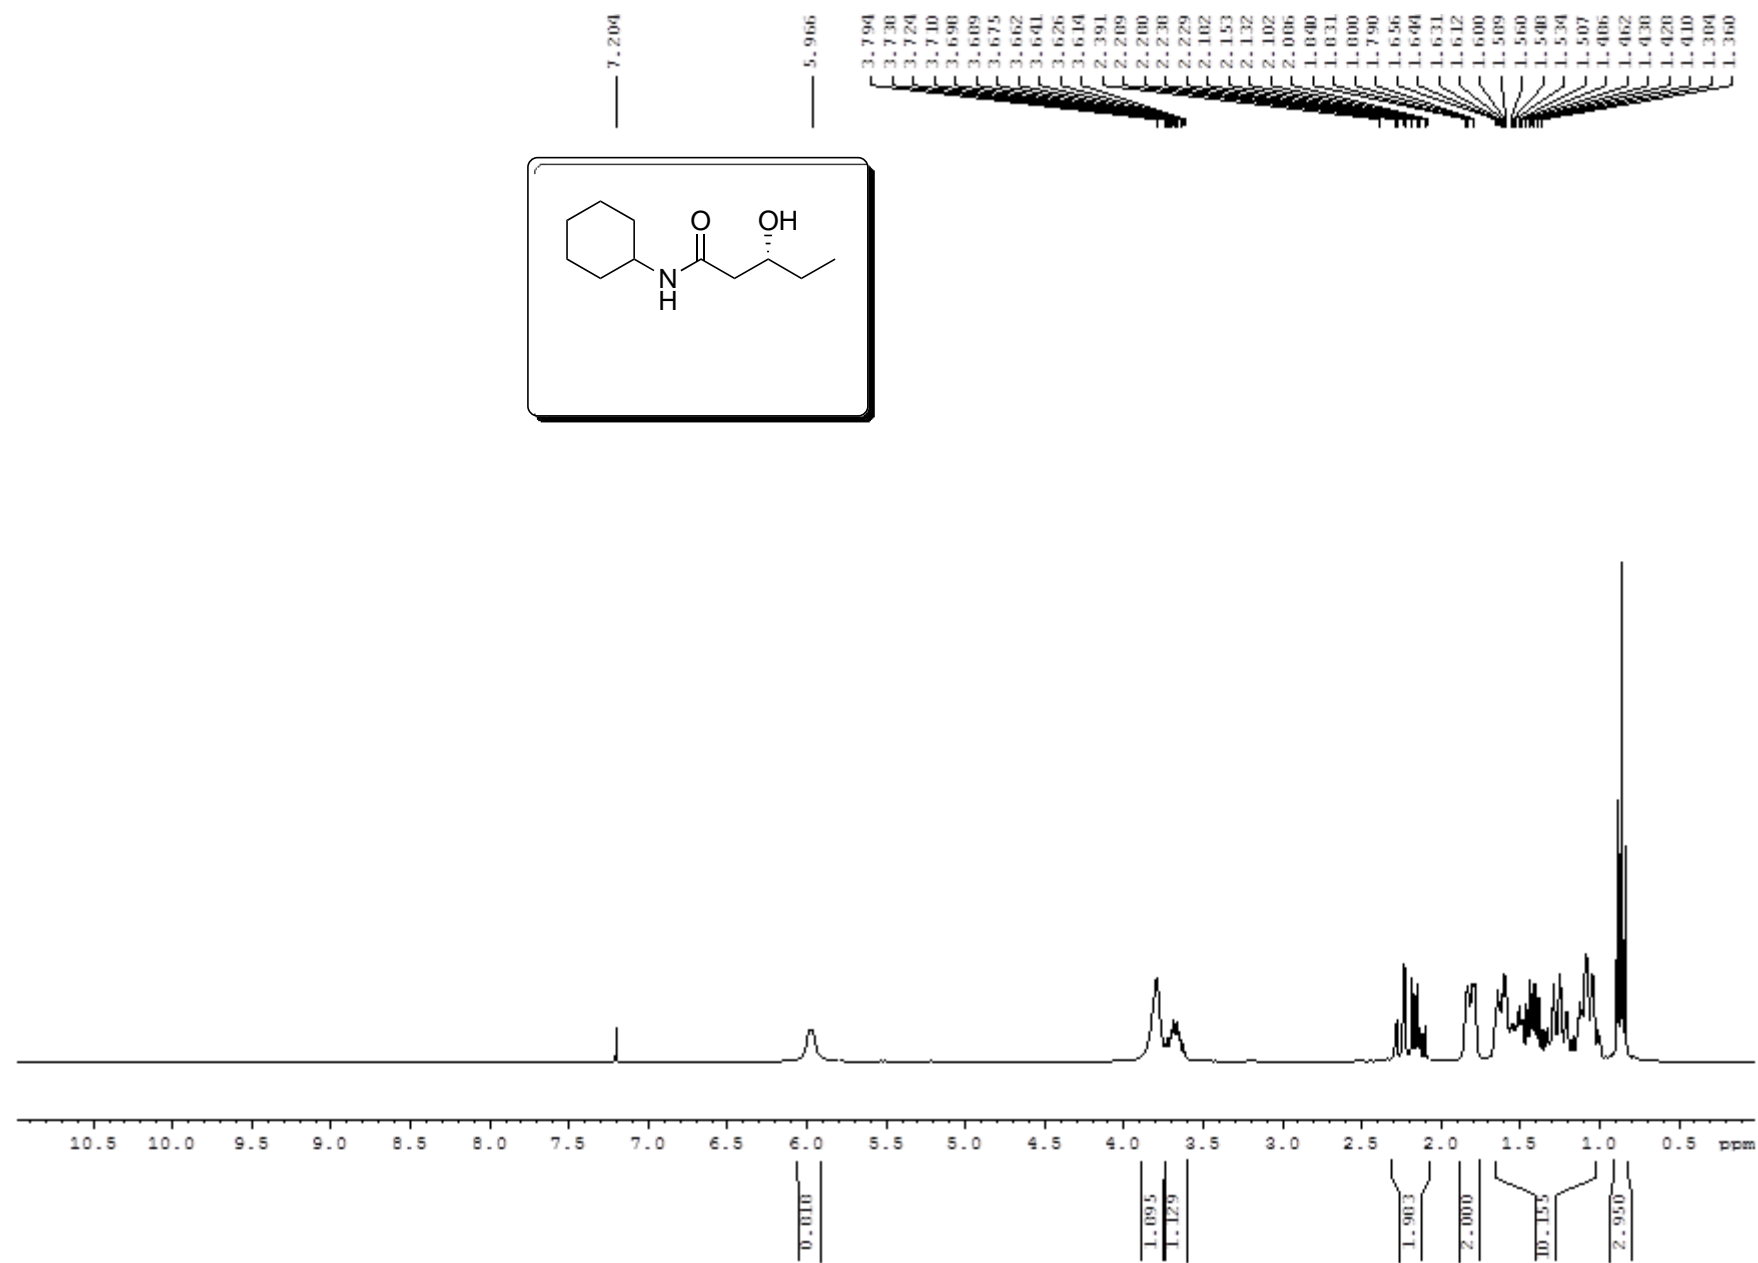

<sup>13</sup>C NMR (CDCl<sub>3</sub>, 75.4 MHz) spectrum of (*R*)-*N*-cyclohexyl-3-hydroxypentanamide (2f-OH)

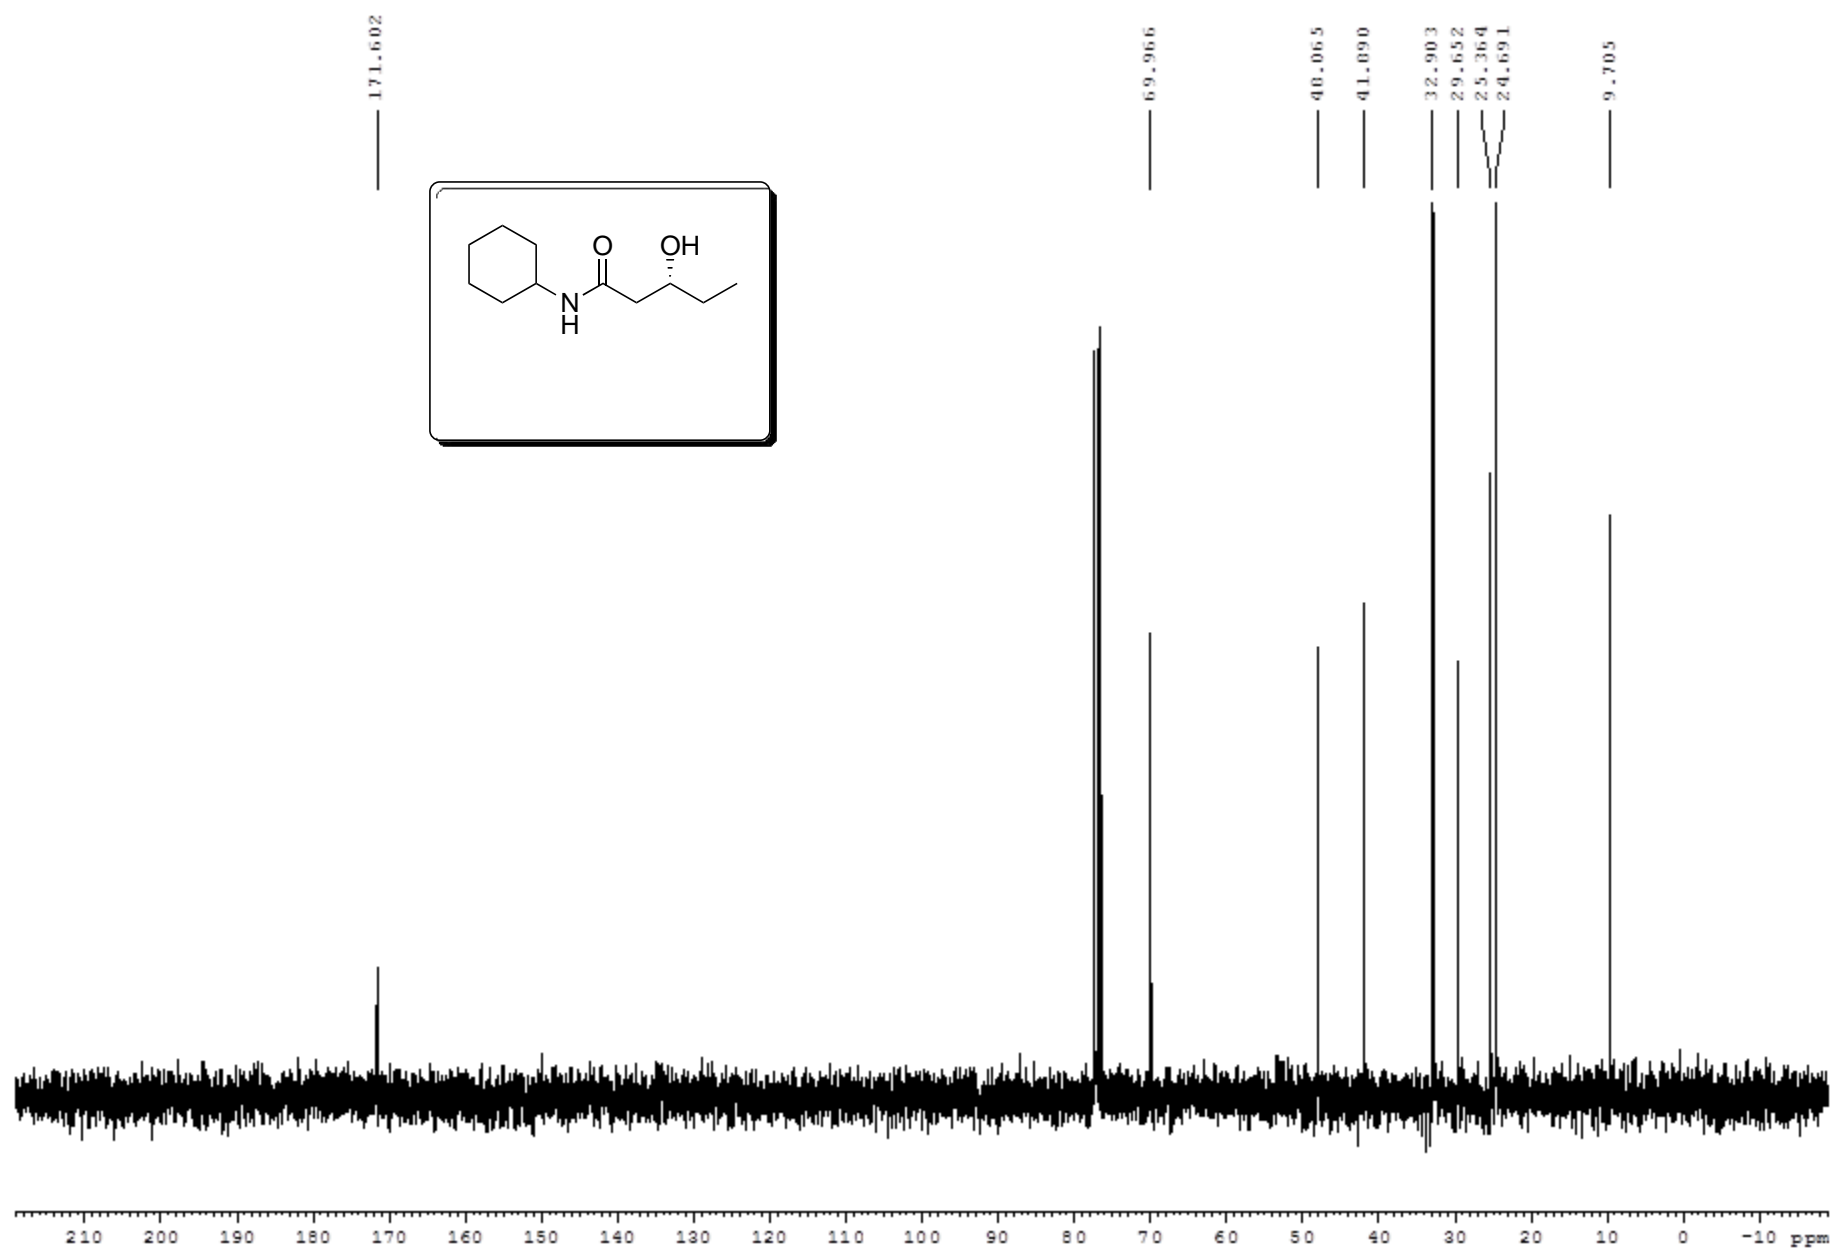

<sup>1</sup>H NMR (CDCl<sub>3</sub>, 500 MHz) spectrum of (*R*)- 3-Hydroxy-1-(piperidin-1-yl)butan-1-one (2g-OH)

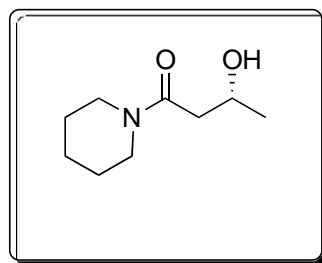

4.199  
4.054  
3.569  
3.557  
3.545  
3.380  
2.500  
2.476  
2.336  
2.317  
2.304  
2.205  
1.659  
1.650  
1.572  
1.559  
1.540  
1.230  
1.210  
1.199  
1.105  
1.171  
1.143  
1.129  
1.115

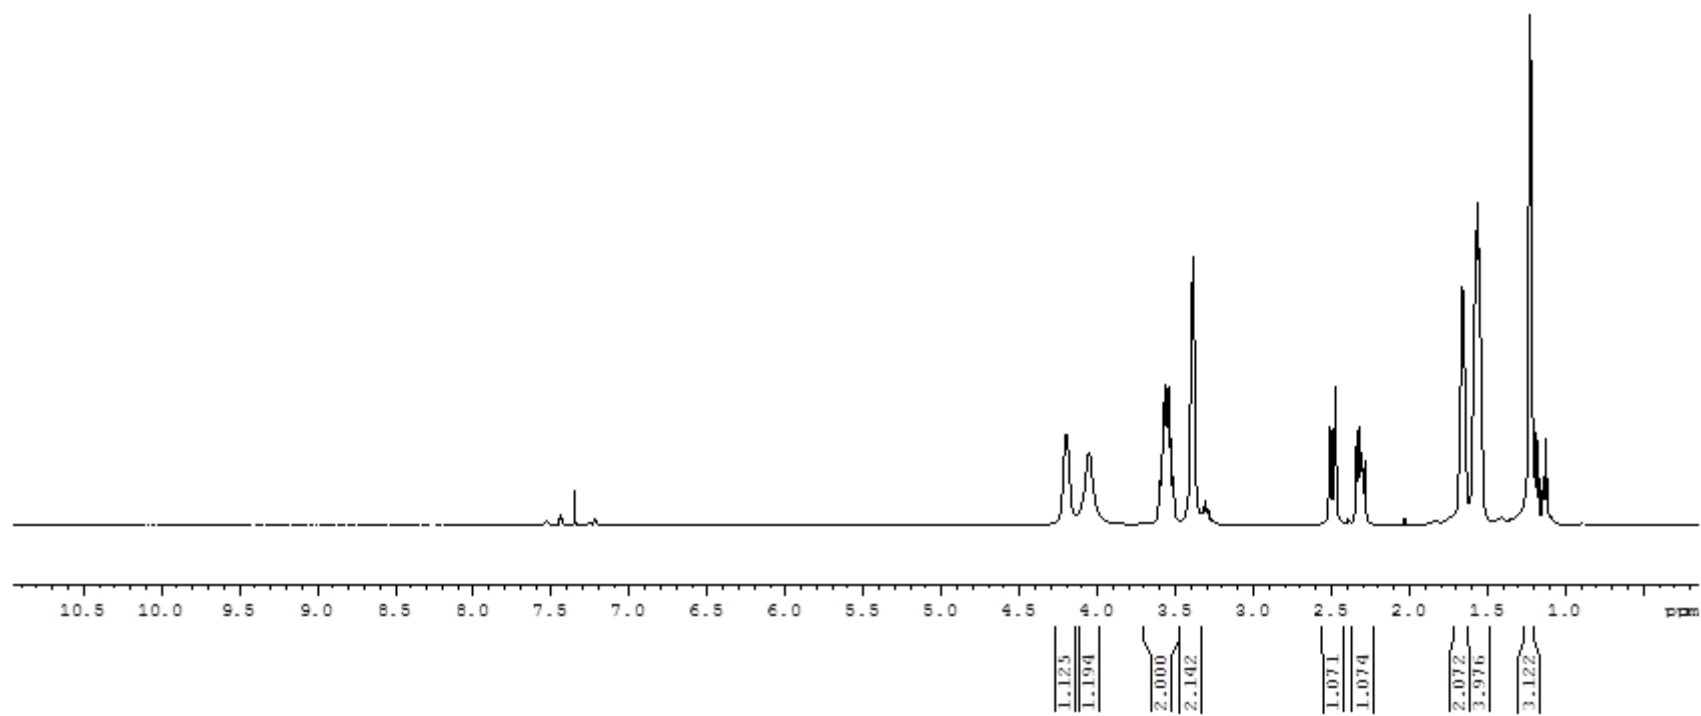

<sup>13</sup>C NMR (CDCl<sub>3</sub>, 125.8 MHz) spectrum of (*R*)- 3-Hydroxy-1-(piperidin-1-yl)butan-1-one (2g-OH)

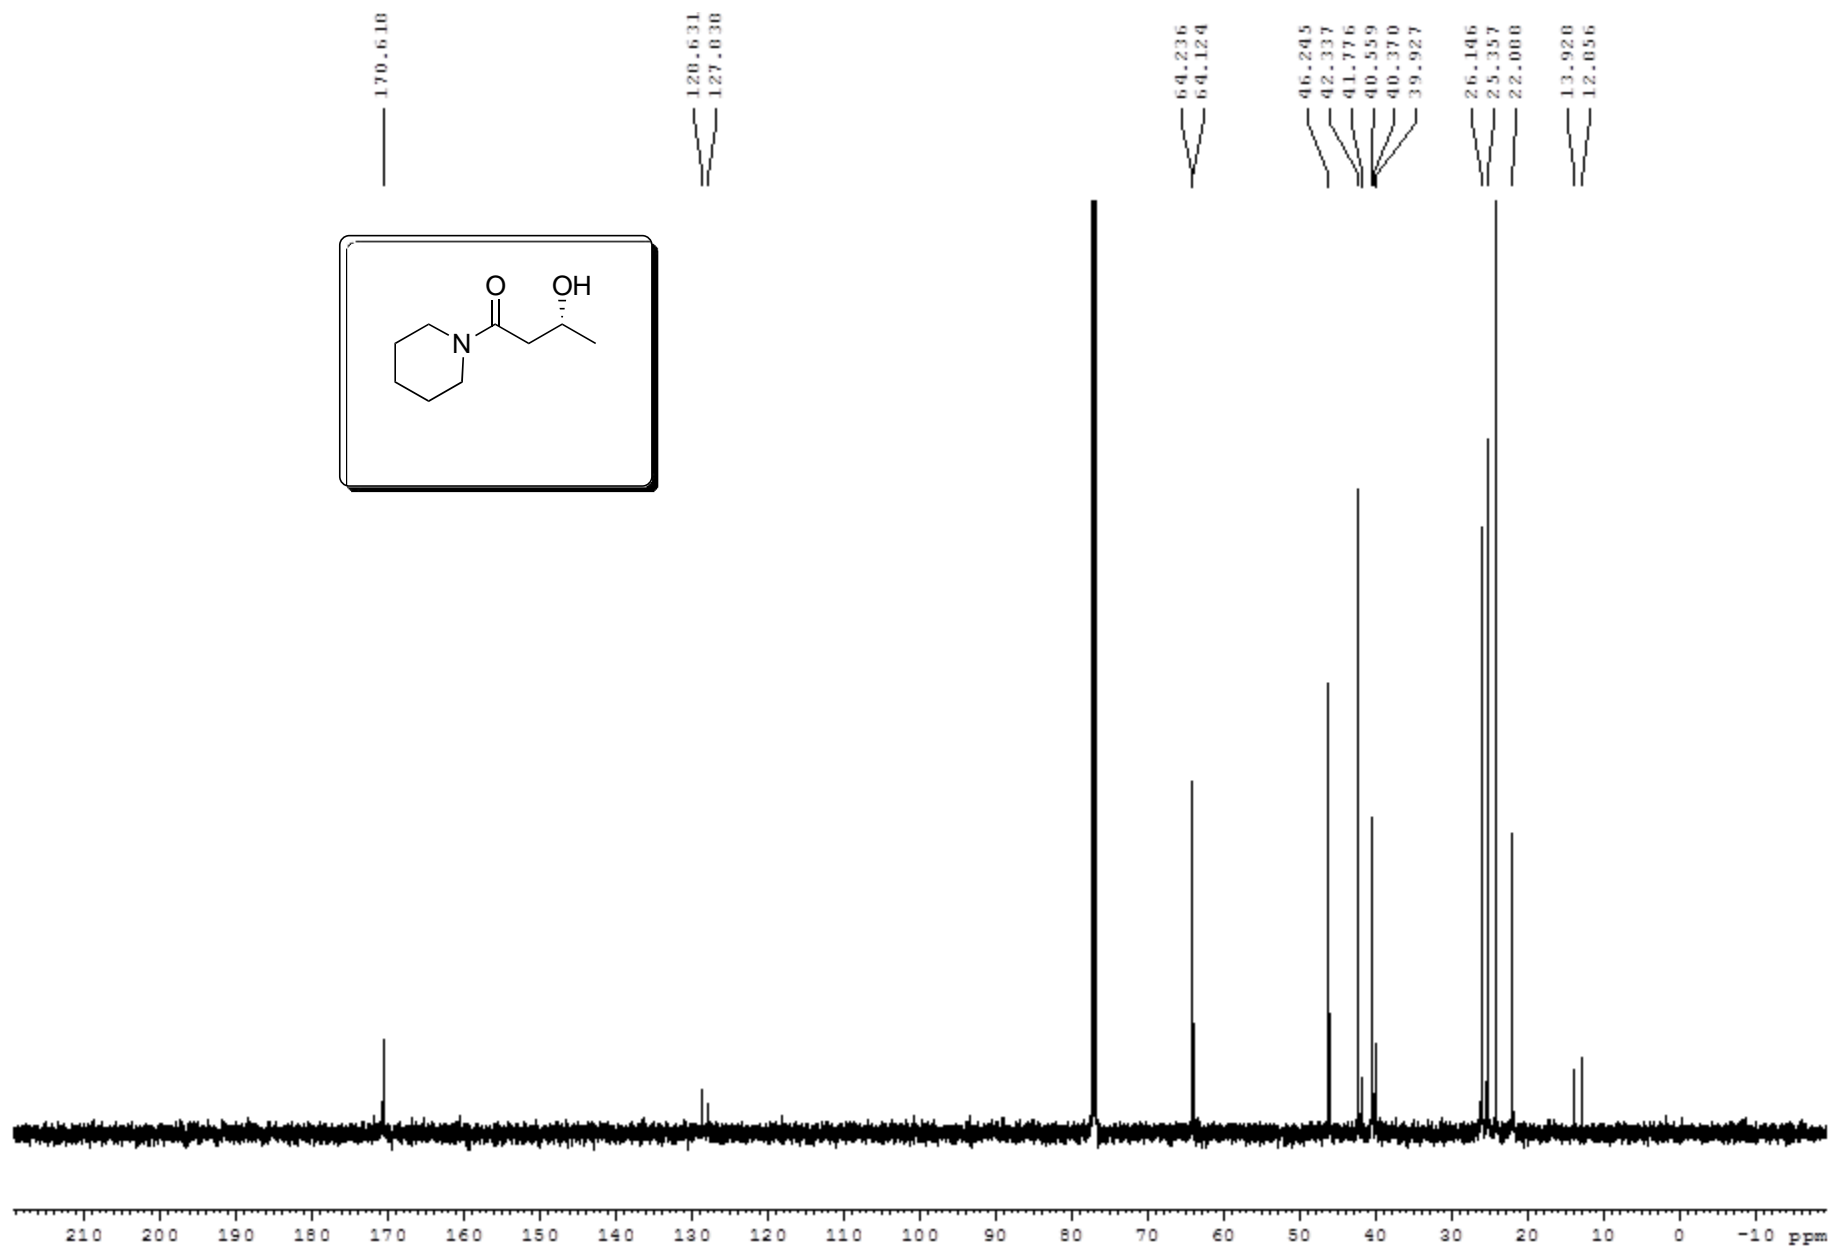



<sup>1</sup>H NMR (CDCl<sub>3</sub>, 360 MHz) spectrum of (*R*)-3-Hydroxy-1-morpholinobutan-1-one (2h-OH)

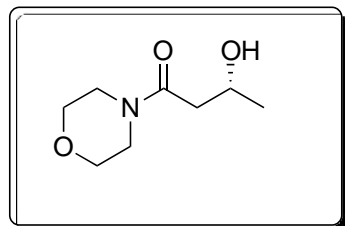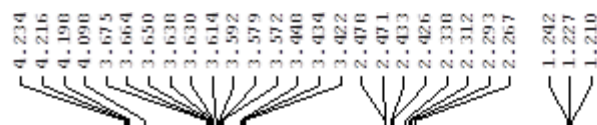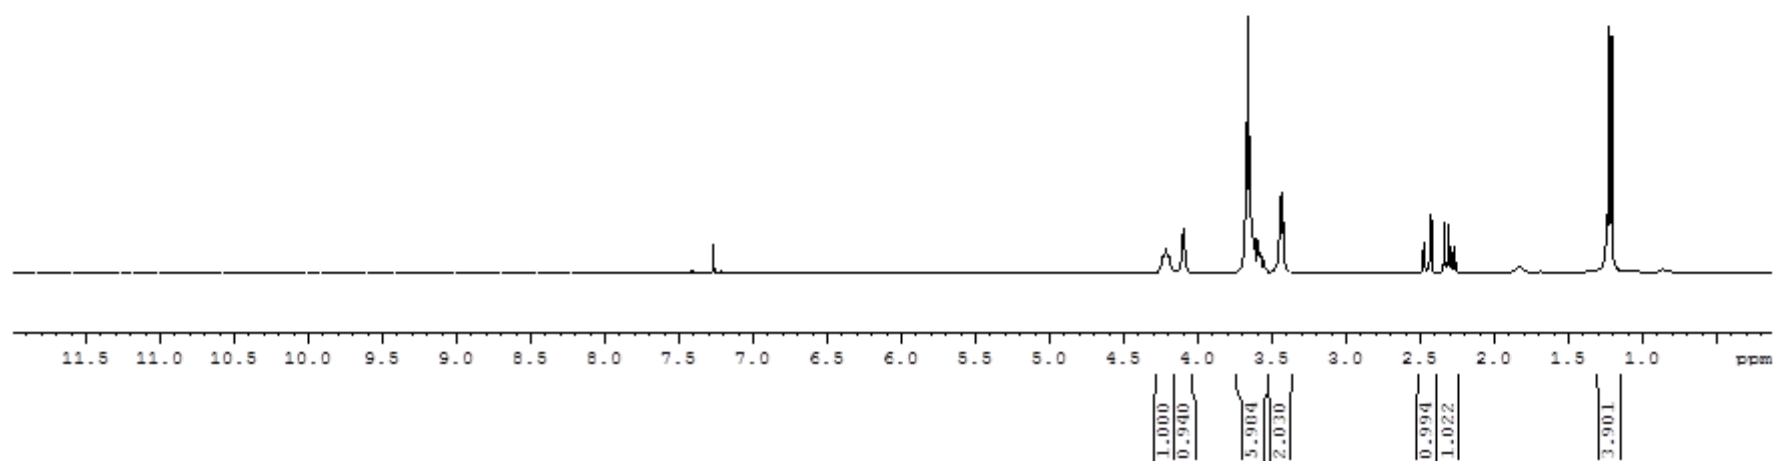

<sup>13</sup>C NMR (CDCl<sub>3</sub>, 90.5 MHz) spectrum of (*R*)-3-Hydroxy-1-morpholinobutan-1-one (2h-OH)

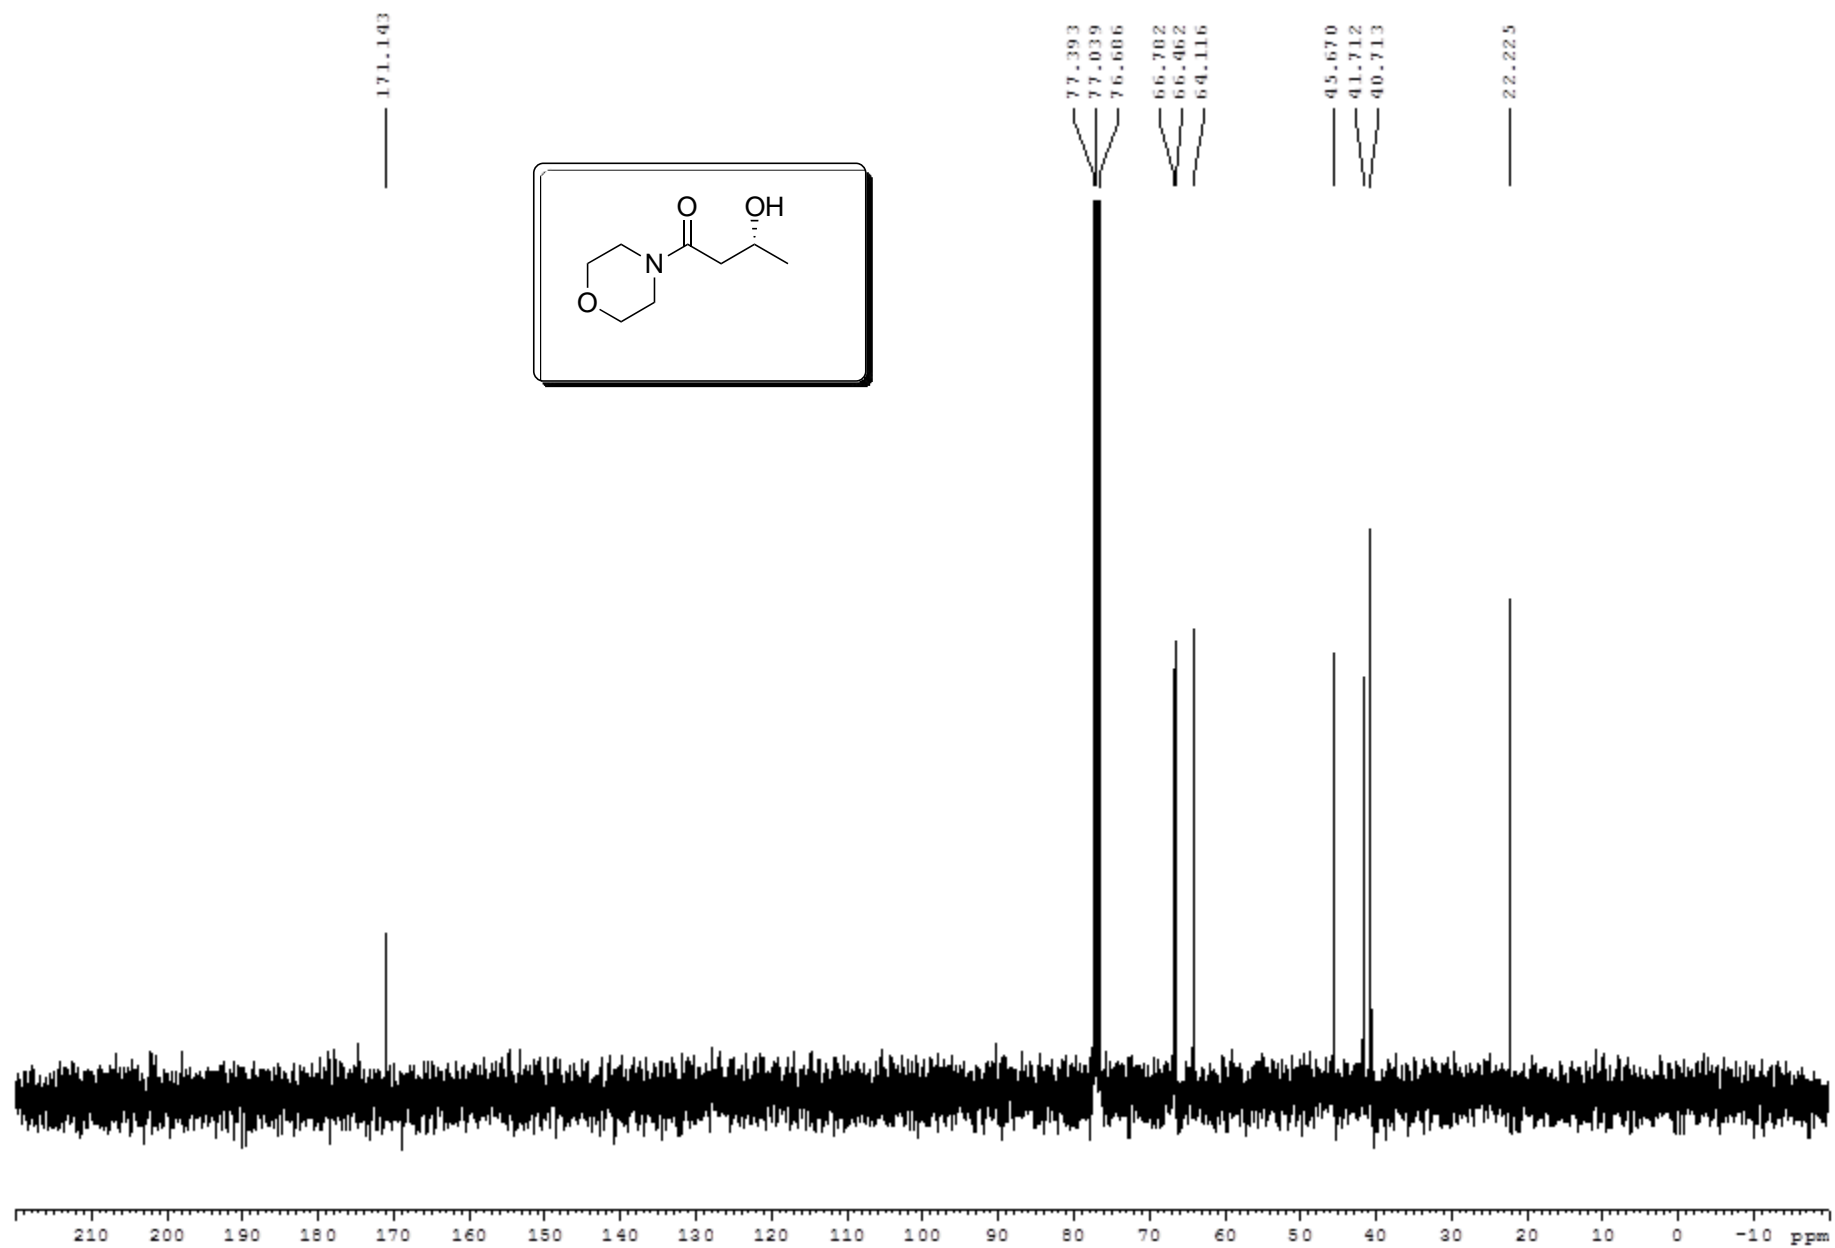

<sup>1</sup>H NMR (CDCl<sub>3</sub>, 500 MHz) spectrum of (S)-3-Hydroxy-N-(4-methoxyphenyl)-3-phenylpropanamide (2i-OH)

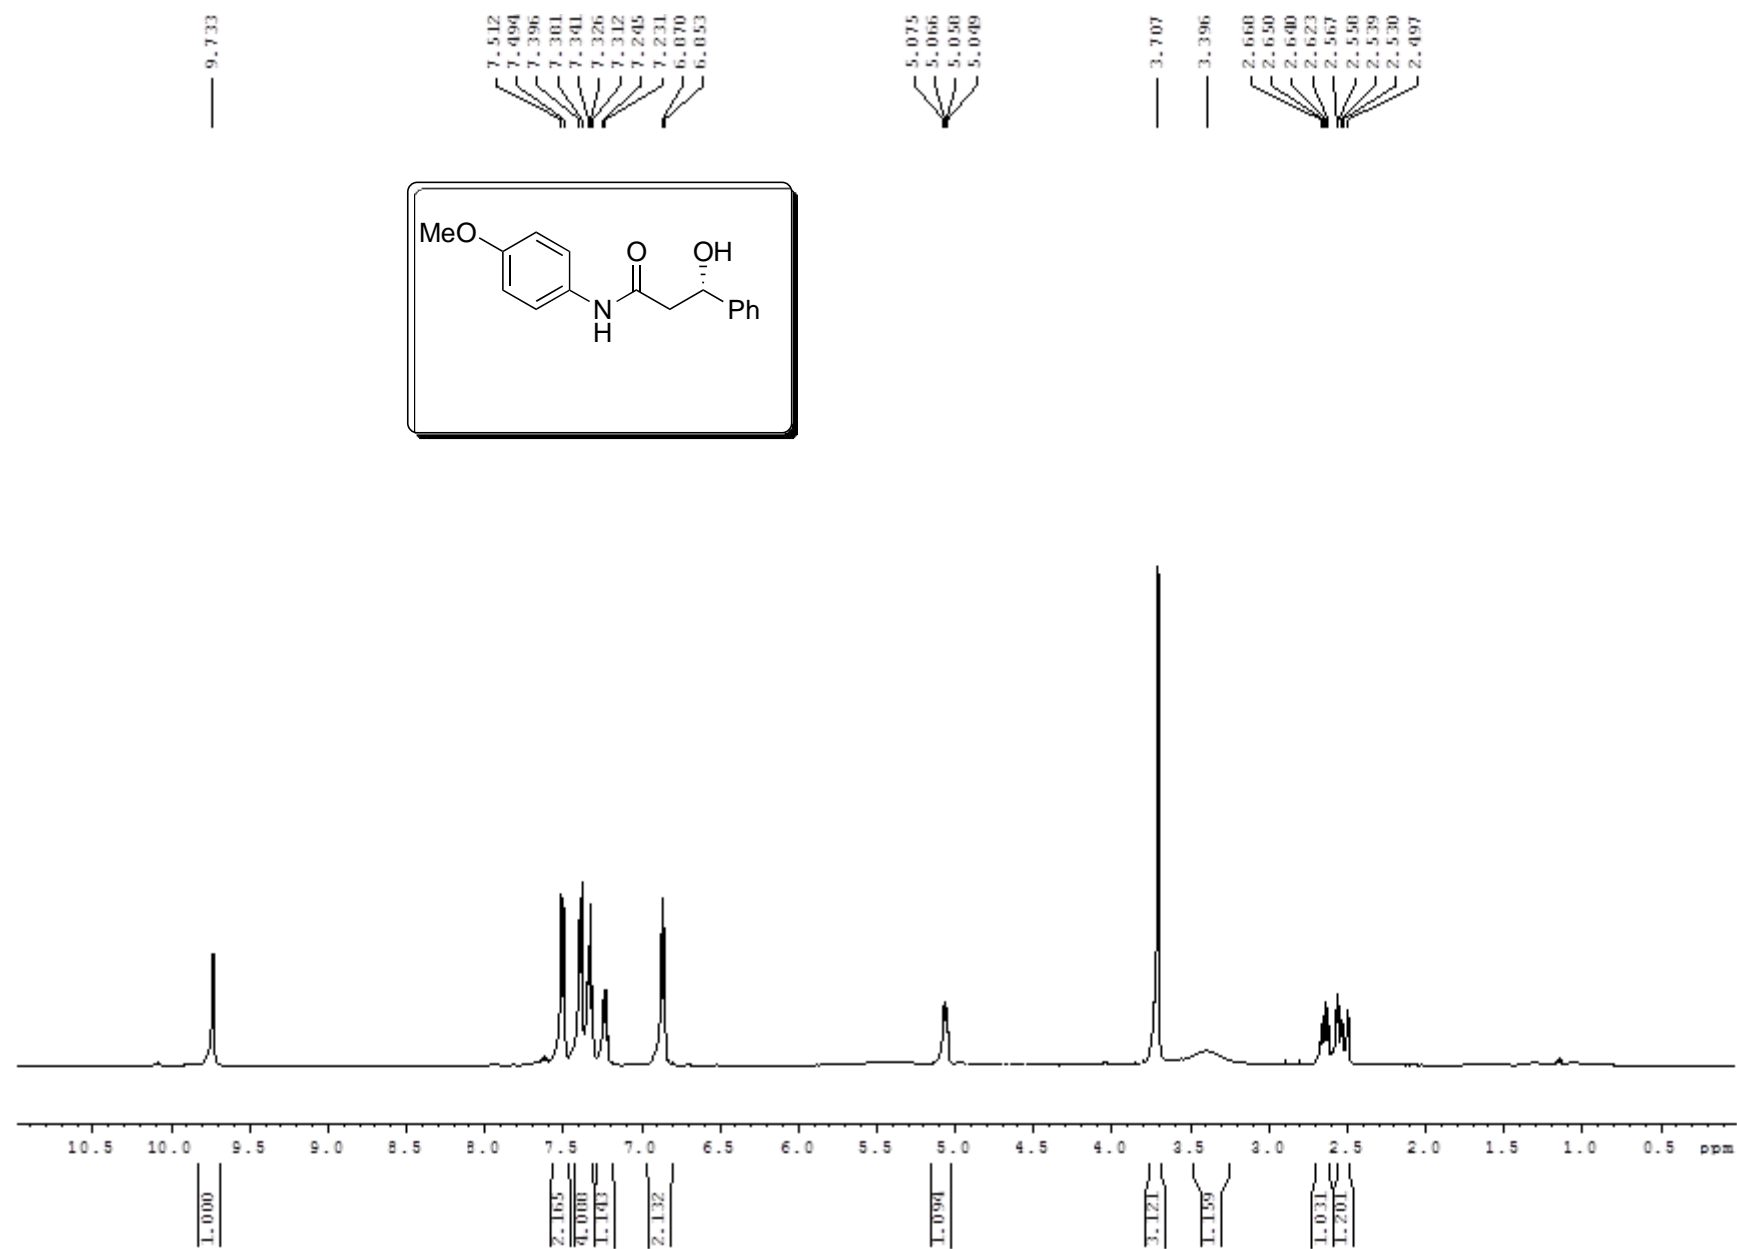

<sup>13</sup>C NMR (CDCl<sub>3</sub>, 125.8 MHz) spectrum of (S)-3-Hydroxy-N-(4-methoxyphenyl)-3-phenylpropanamide (2i-OH)

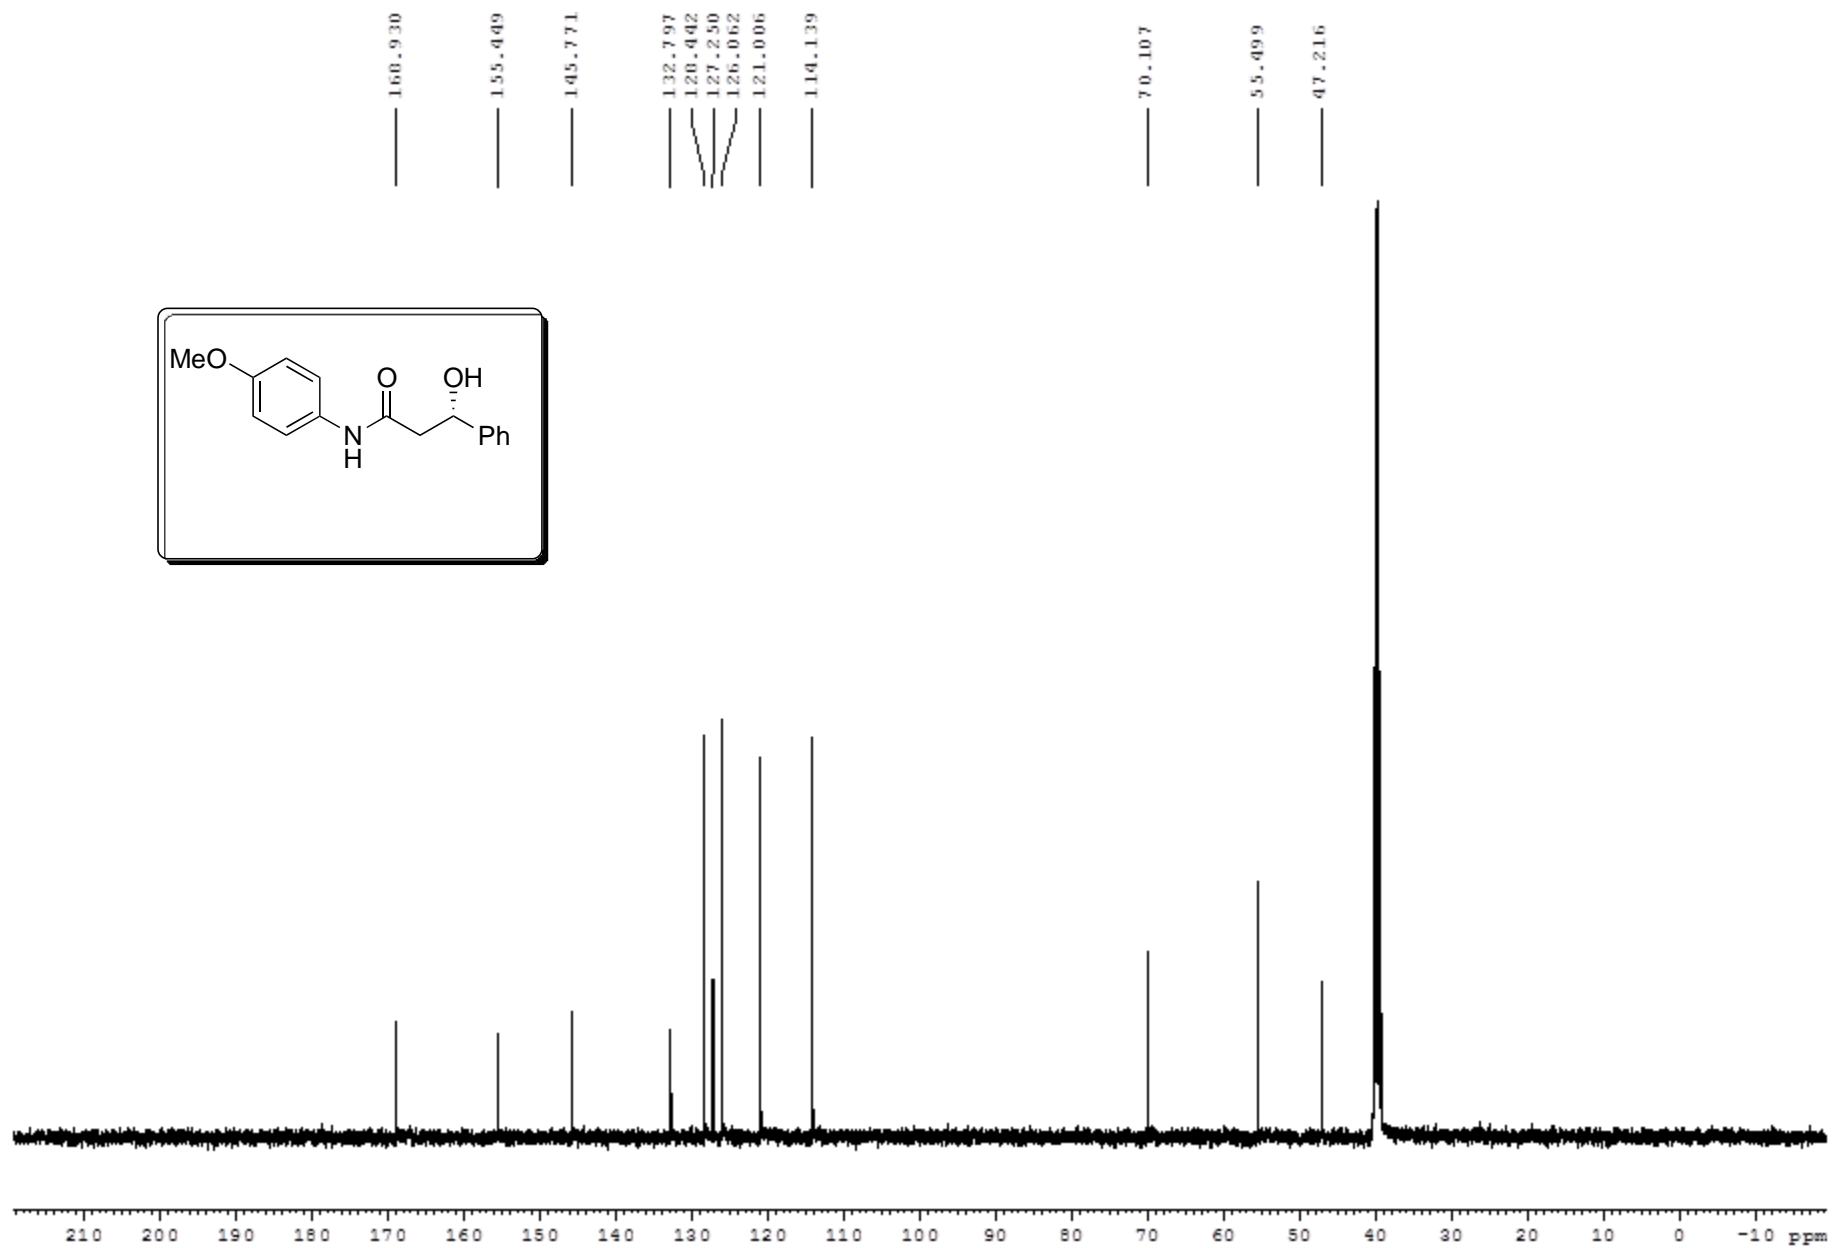

<sup>1</sup>H NMR (CDCl<sub>3</sub>, 500 MHz) spectrum of potassium (*R*)-*N*-ethyl-3-hydroxy-*N*-(*o*-tolyl)butanamide (2j-OH)

7.202  
7.200  
7.260  
7.266  
7.034

4.213  
4.109  
4.097  
4.090  
4.003  
4.077  
4.071  
4.057

3.220  
3.210  
3.196  
3.183

2.200  
2.185  
2.135  
2.090  
2.093  
1.998  
1.979  
1.913  
1.906  
1.100  
1.106  
1.035  
1.029  
1.023  
1.017

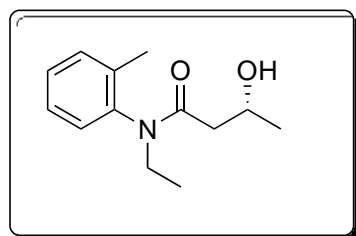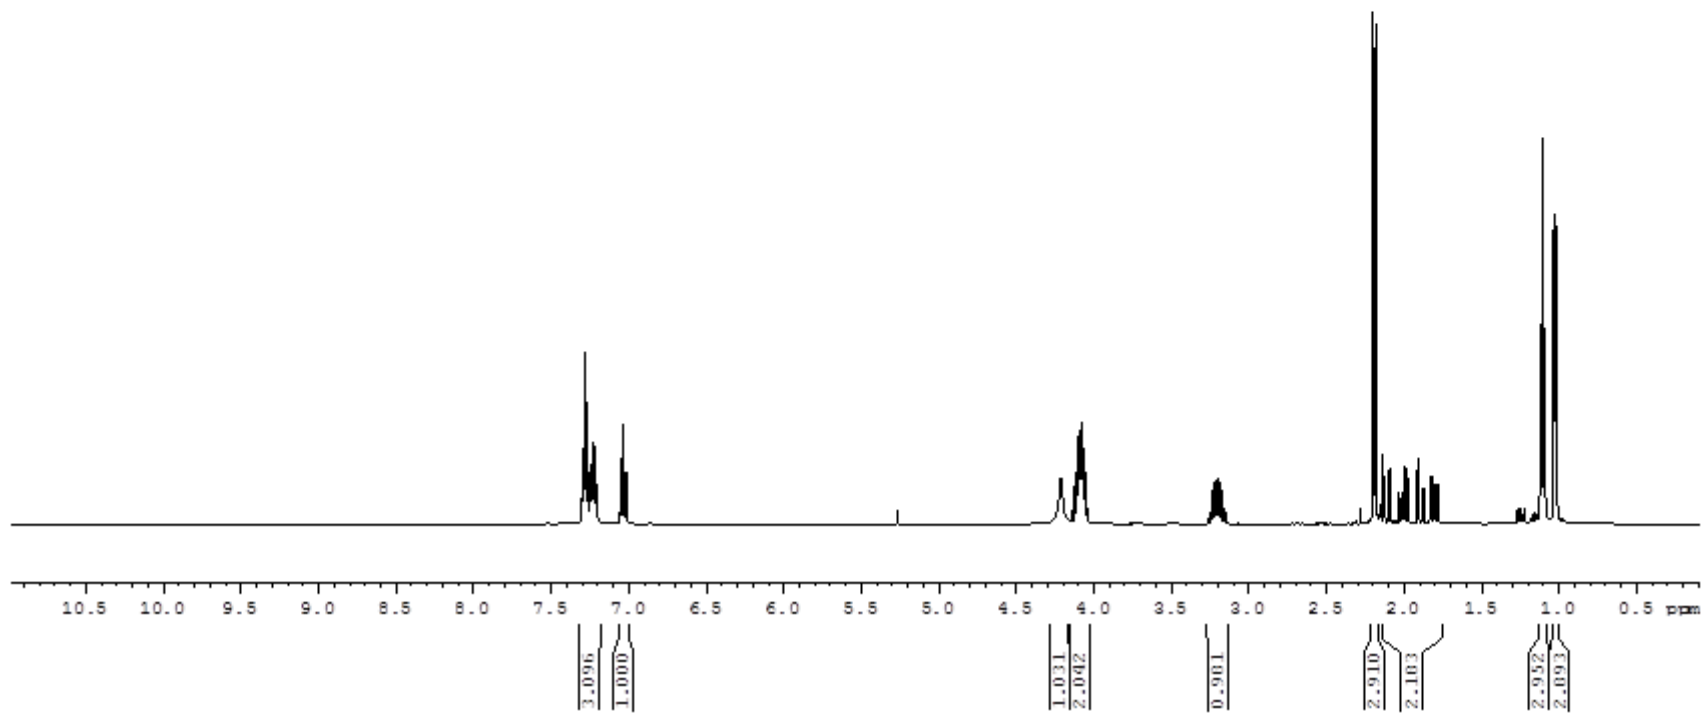

<sup>13</sup>C NMR (CDCl<sub>3</sub>, 125.8 MHz) spectrum of potassium (*R*)-*N*-ethyl-3-hydroxy-*N*-(*o*-tolyl)butanamide (2j-OH)

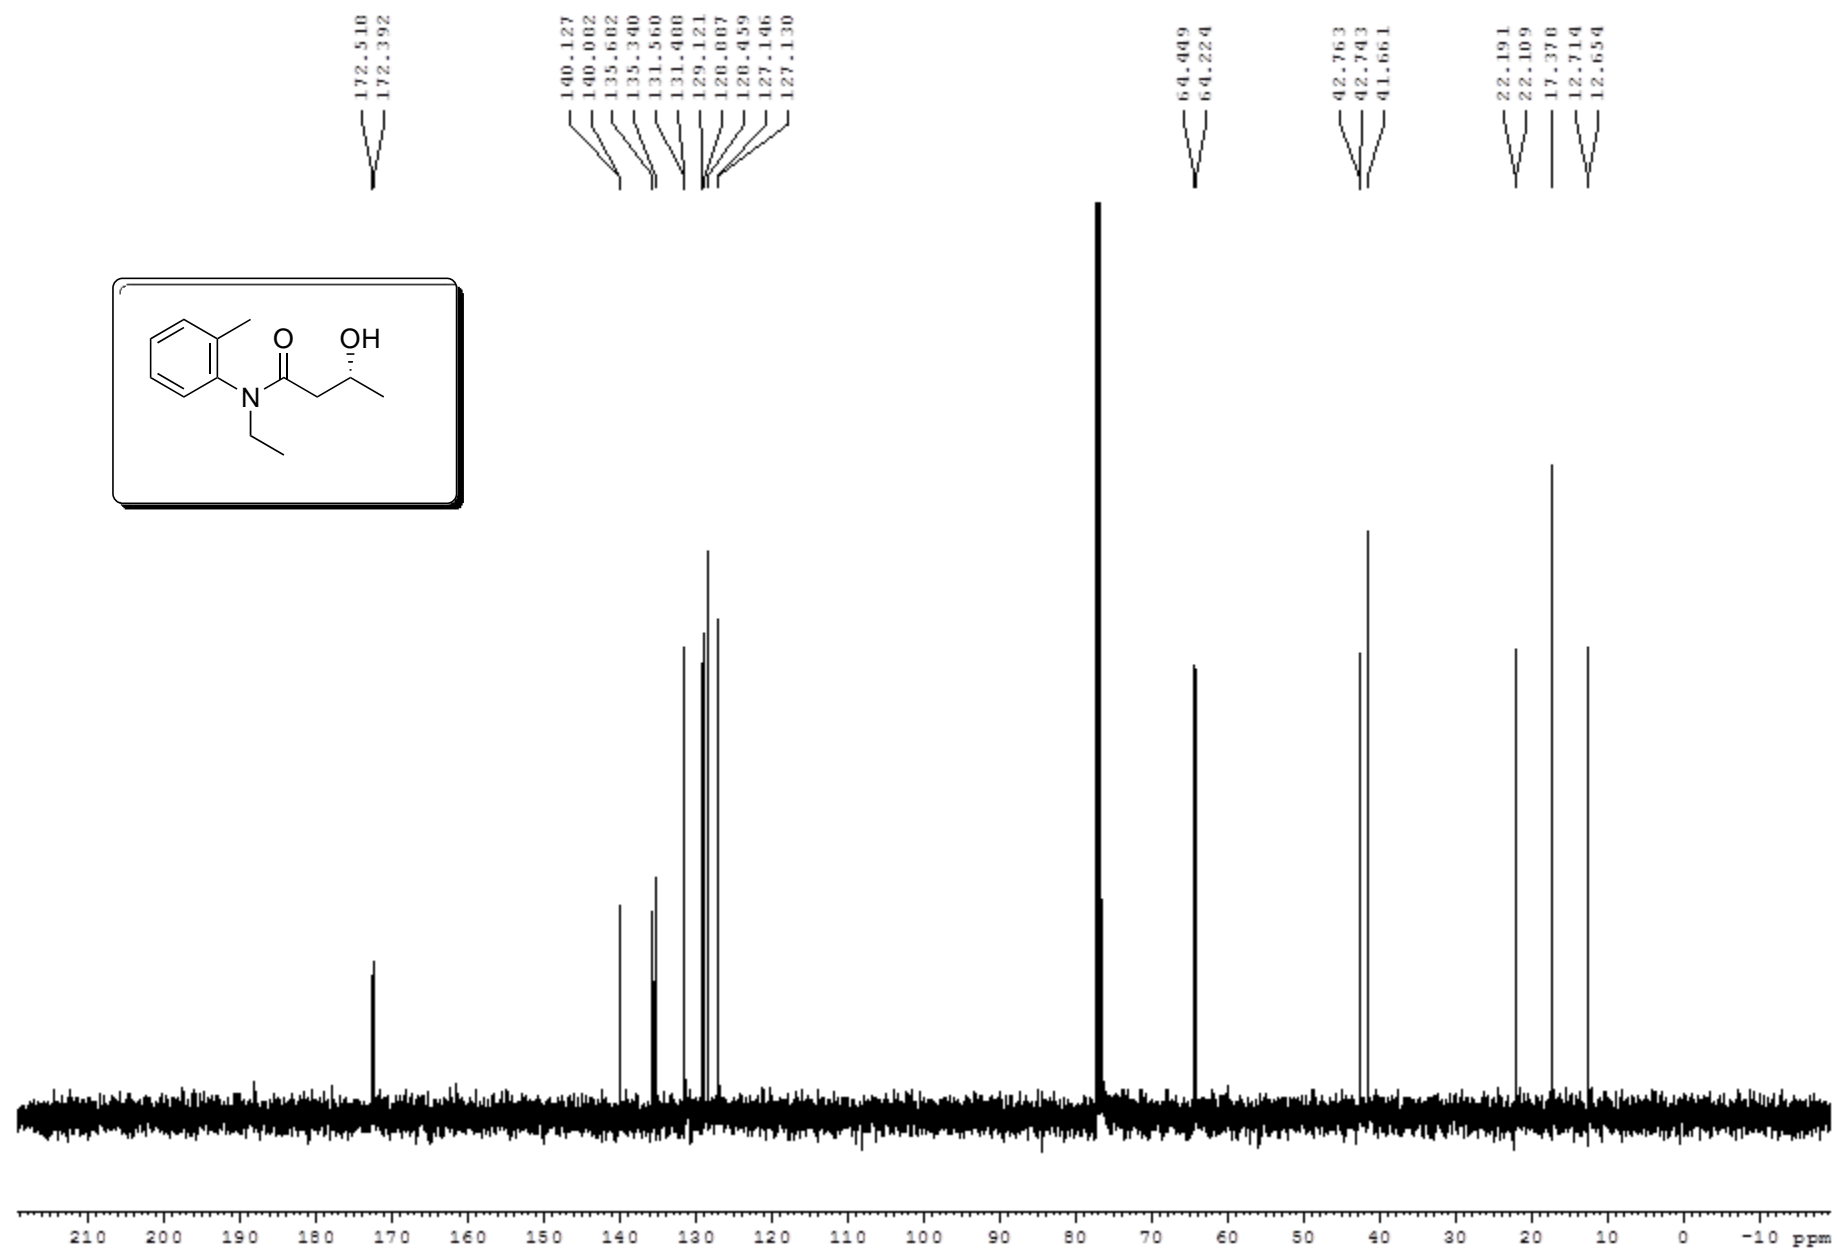

<sup>1</sup>H NMR (CDCl<sub>3</sub>, 500 MHz) spectrum of (*R*)-3-hydroxy-*N,N*-dimethylbutanamide (2k-OH)

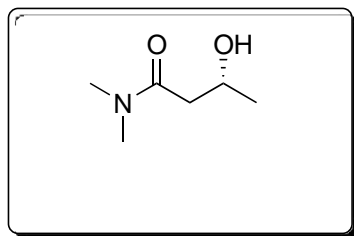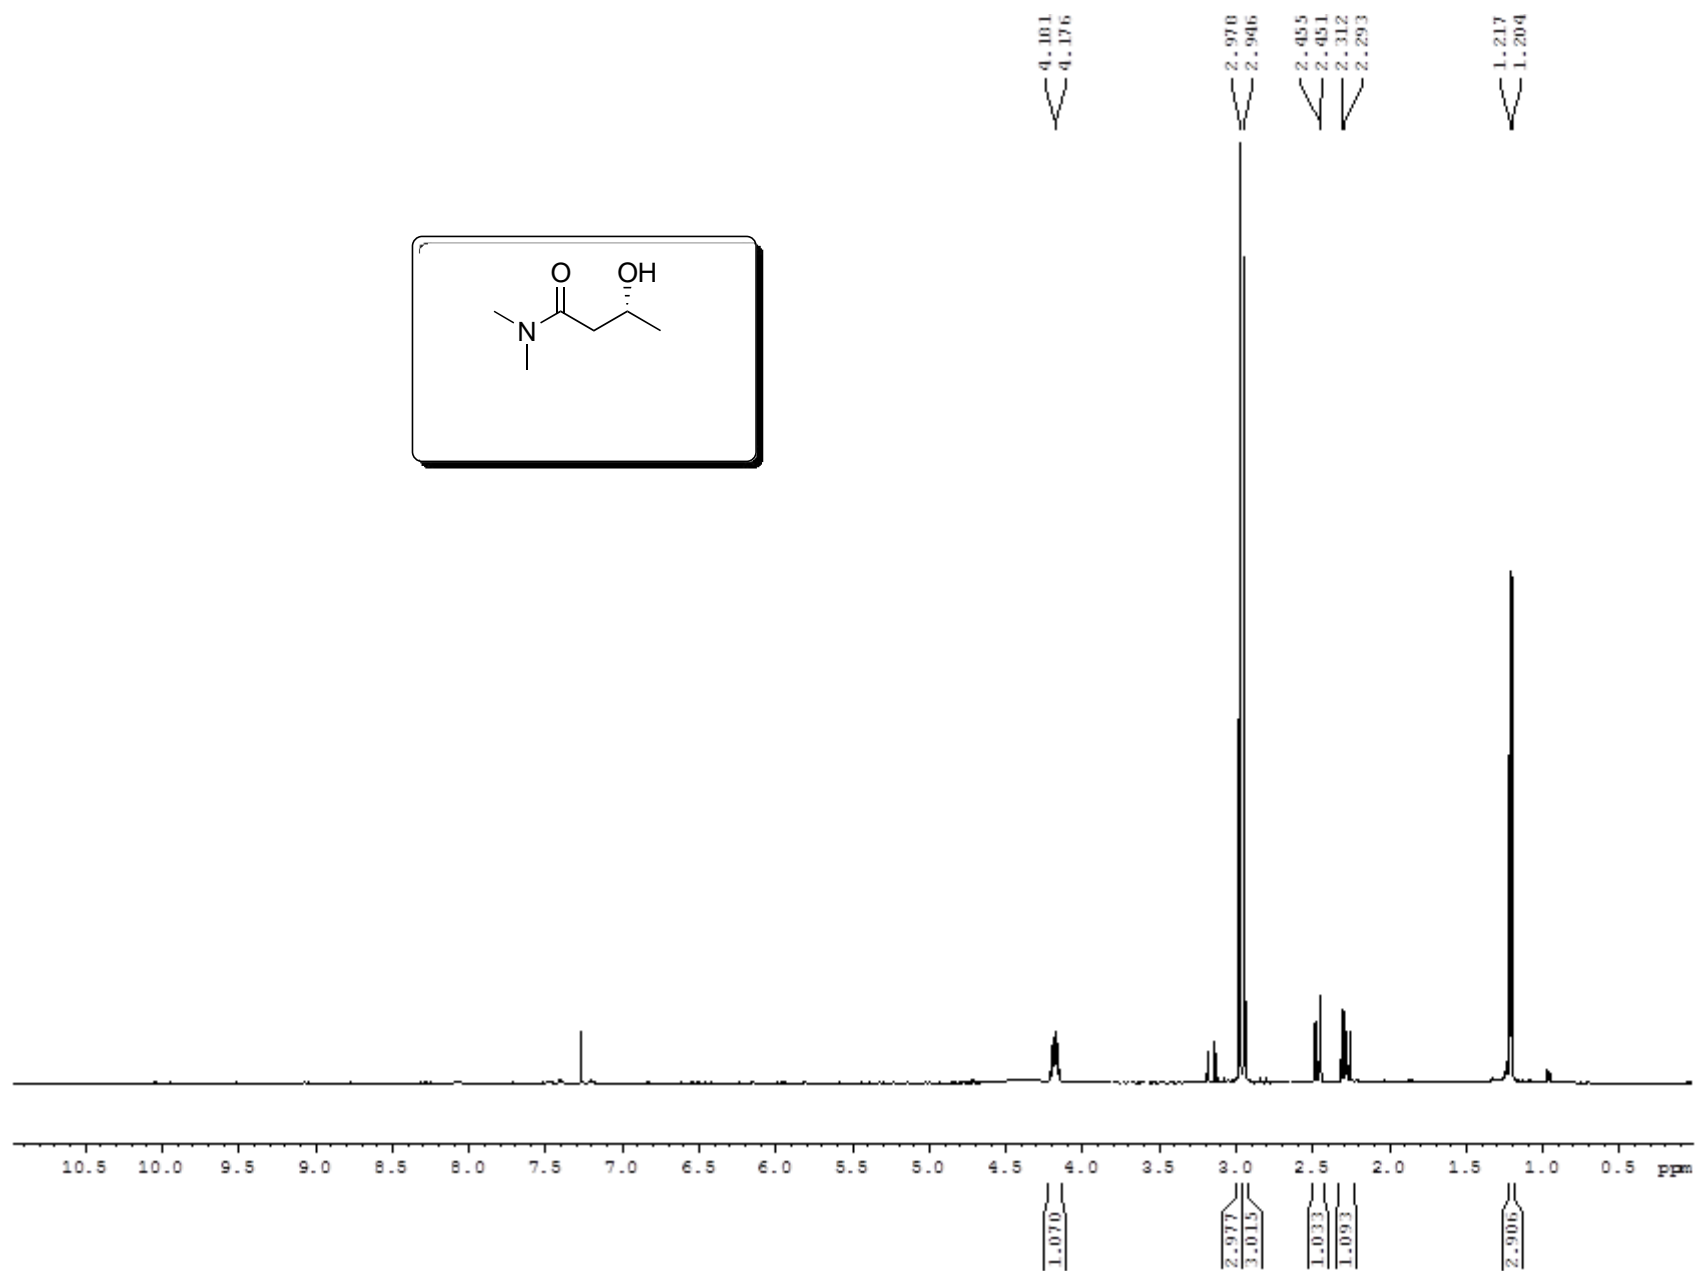

<sup>13</sup>C NMR (CDCl<sub>3</sub>, 125.8 MHz) spectrum of (*R*)-3-hydroxy-*N,N*-dimethylbutanamide (2k-OH)

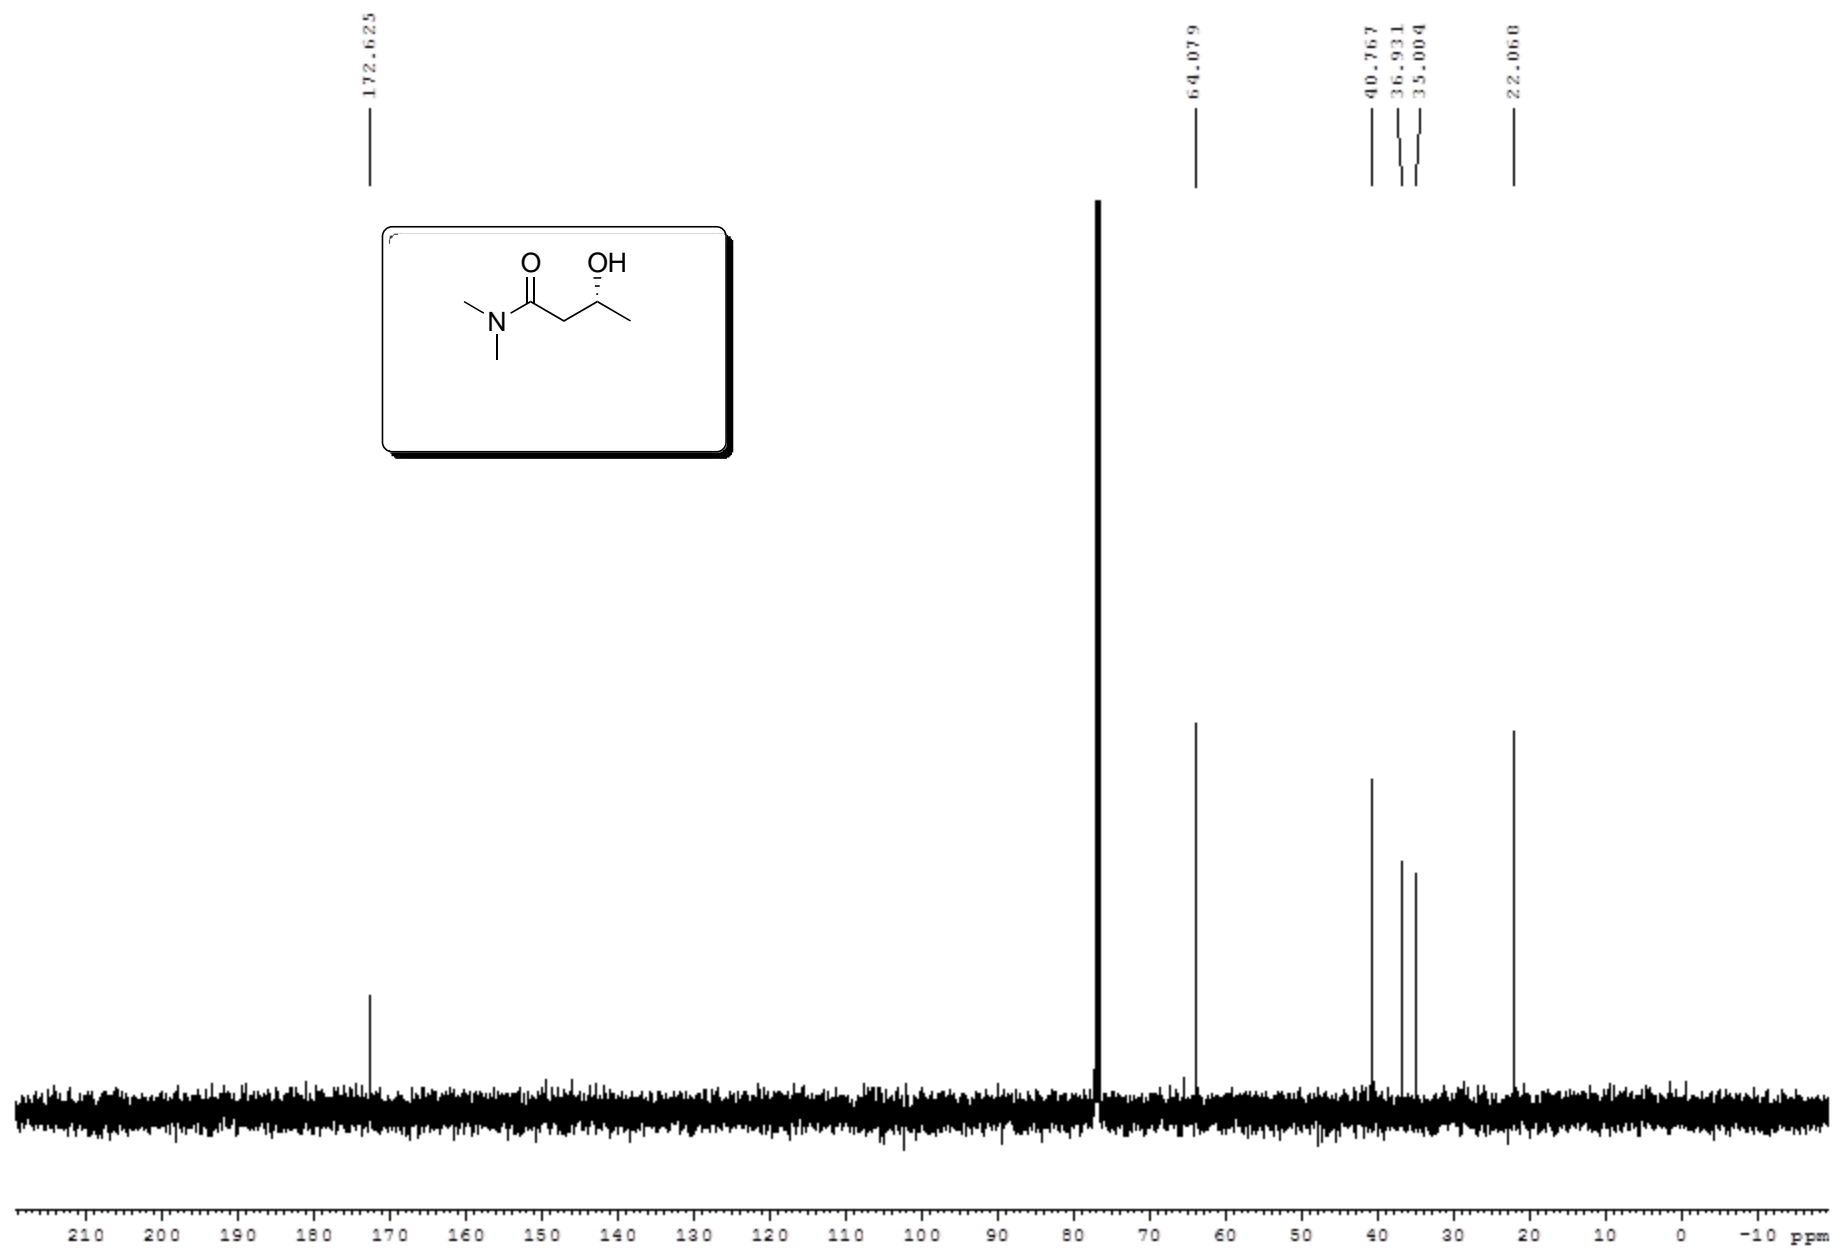



<sup>1</sup>H NMR (CDCl<sub>3</sub>, 500 MHz) spectrum of (R)-N,N-Dibenzyl-3-hydroxybutanamide (2l-OH)

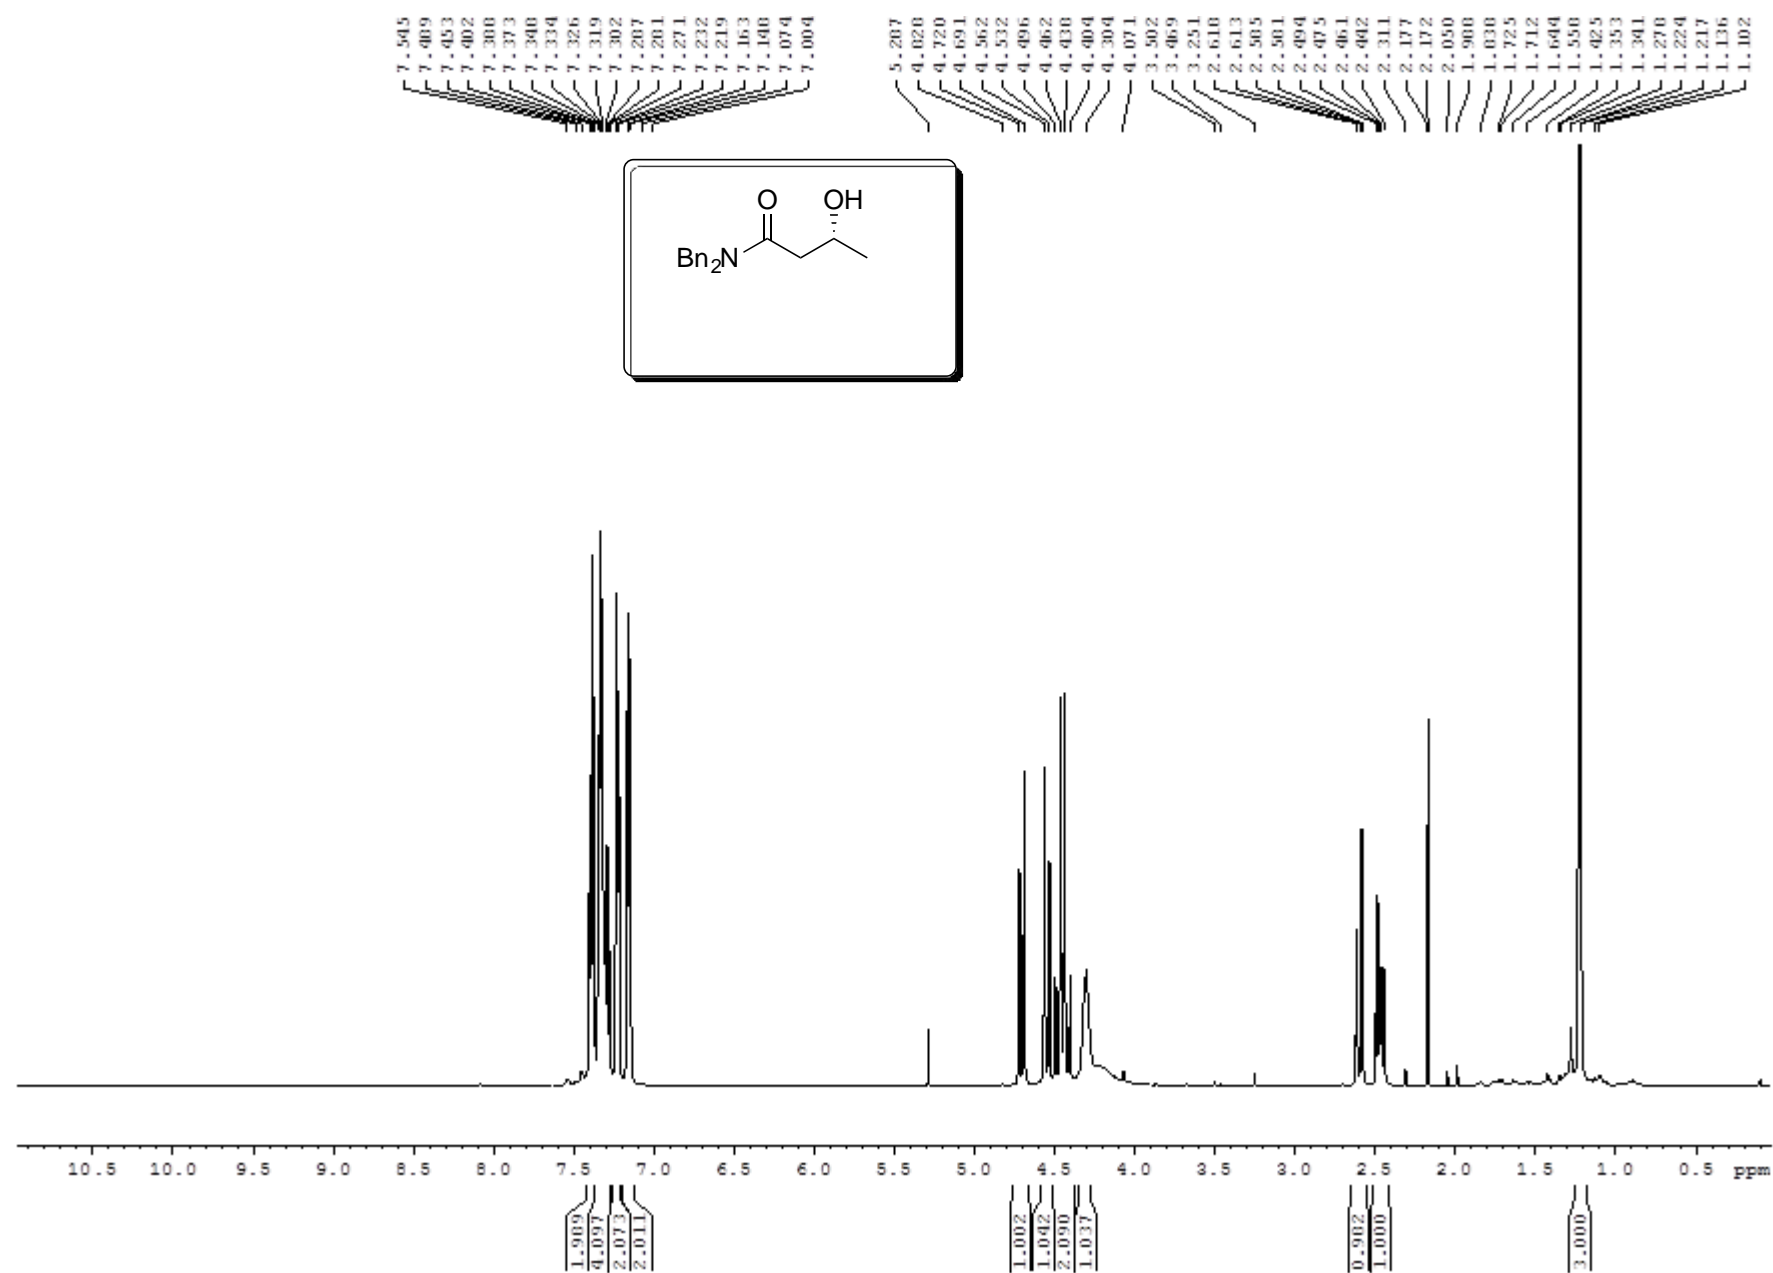

<sup>13</sup>C NMR (CDCl<sub>3</sub>, 125.8 MHz) spectrum of (R)-N,N-Dibenzyl-3-hydroxybutanamide (2I-OH)

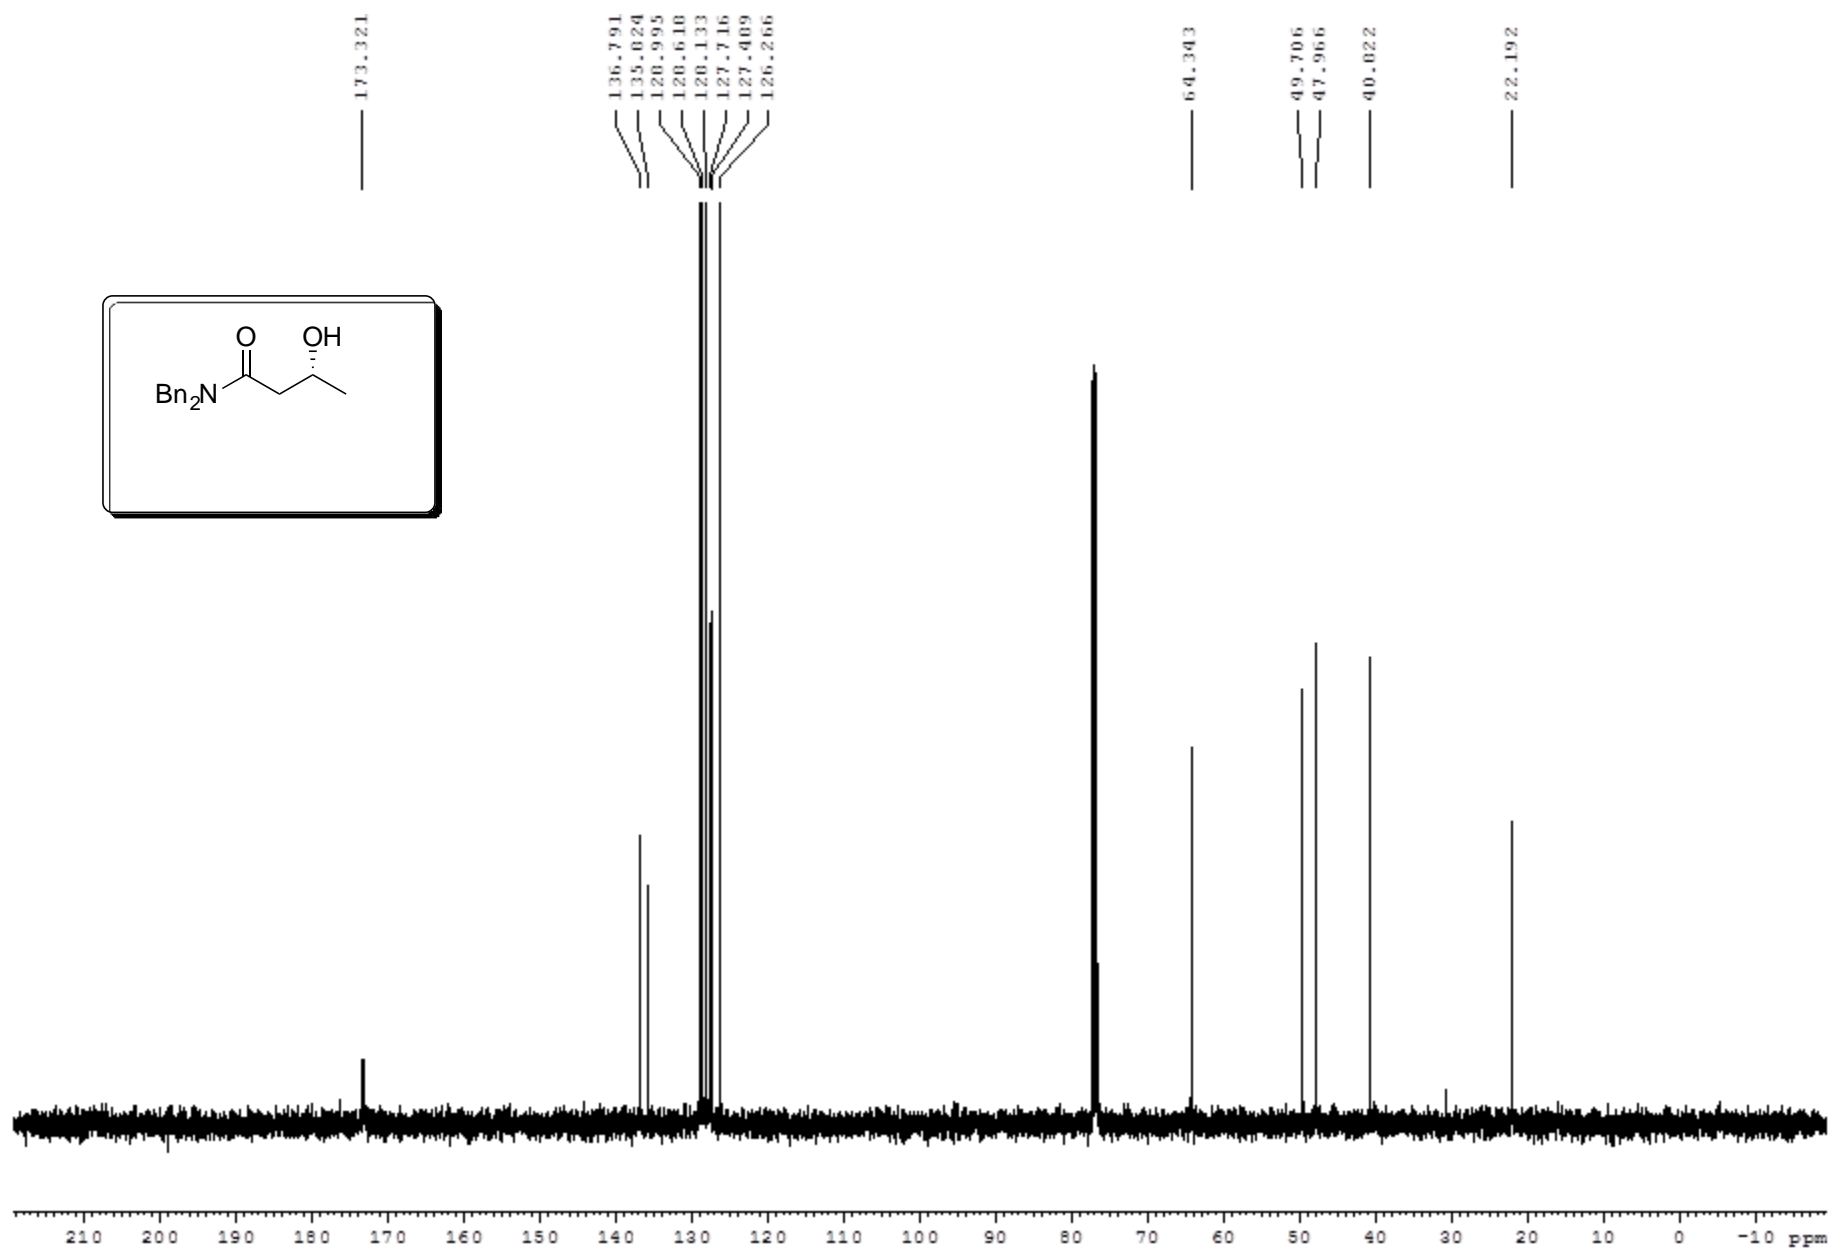

<sup>1</sup>H NMR (CDCl<sub>3</sub>, 300 MHz) spectrum of (S)-N-Cyclohexyl-3-hydroxy-3-phenylpropanamide (2m-OH)

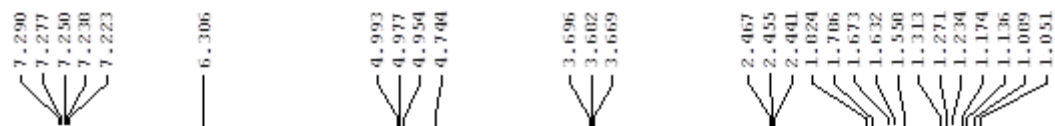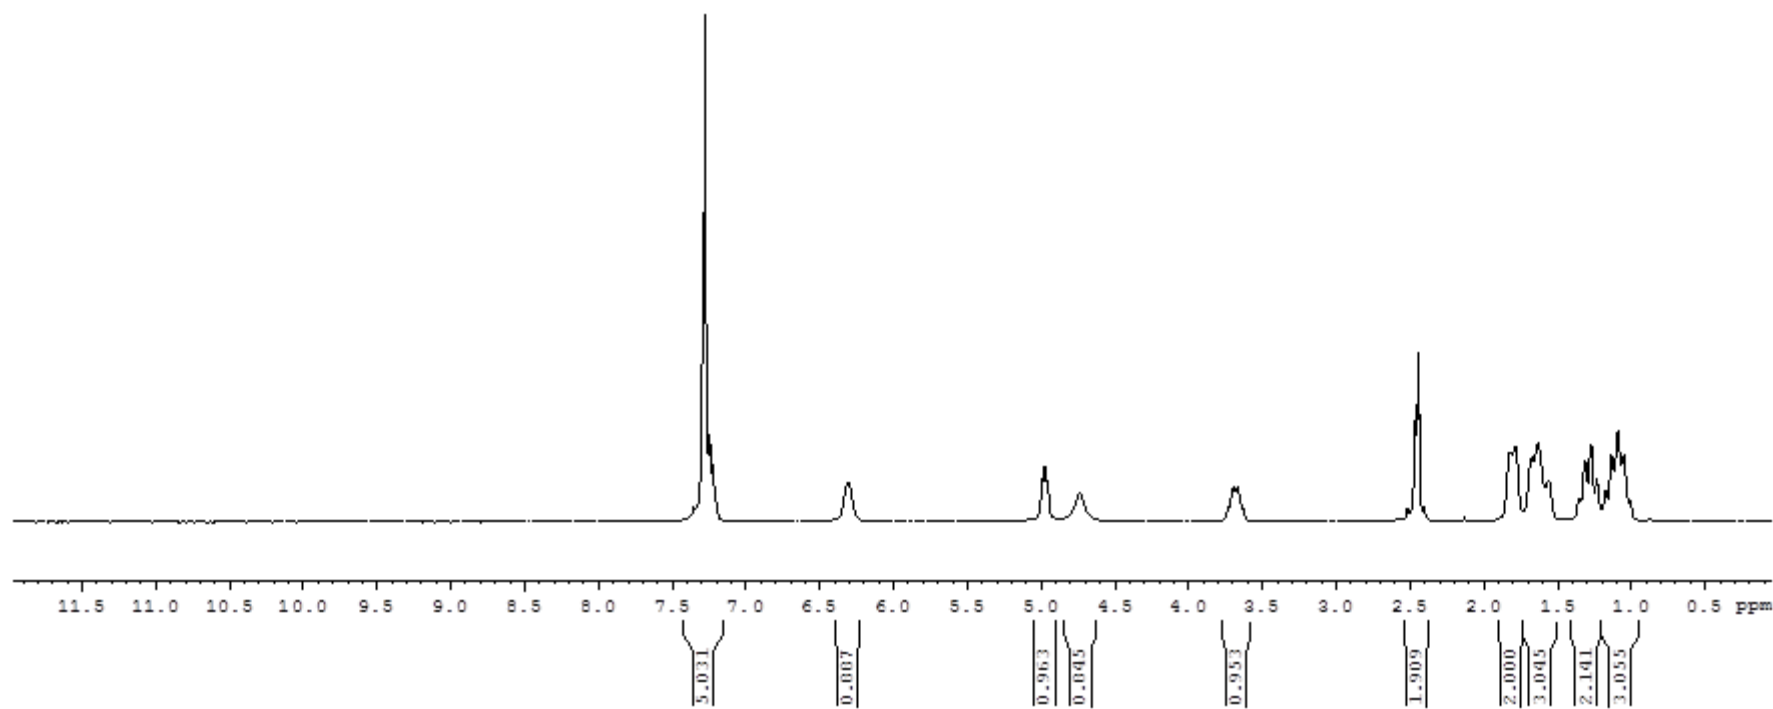

<sup>13</sup>C NMR (CDCl<sub>3</sub>, 75.4 MHz) spectrum of (S)- N-Cyclohexyl-3-hydroxy-3-phenylpropanamide (2m-OH)

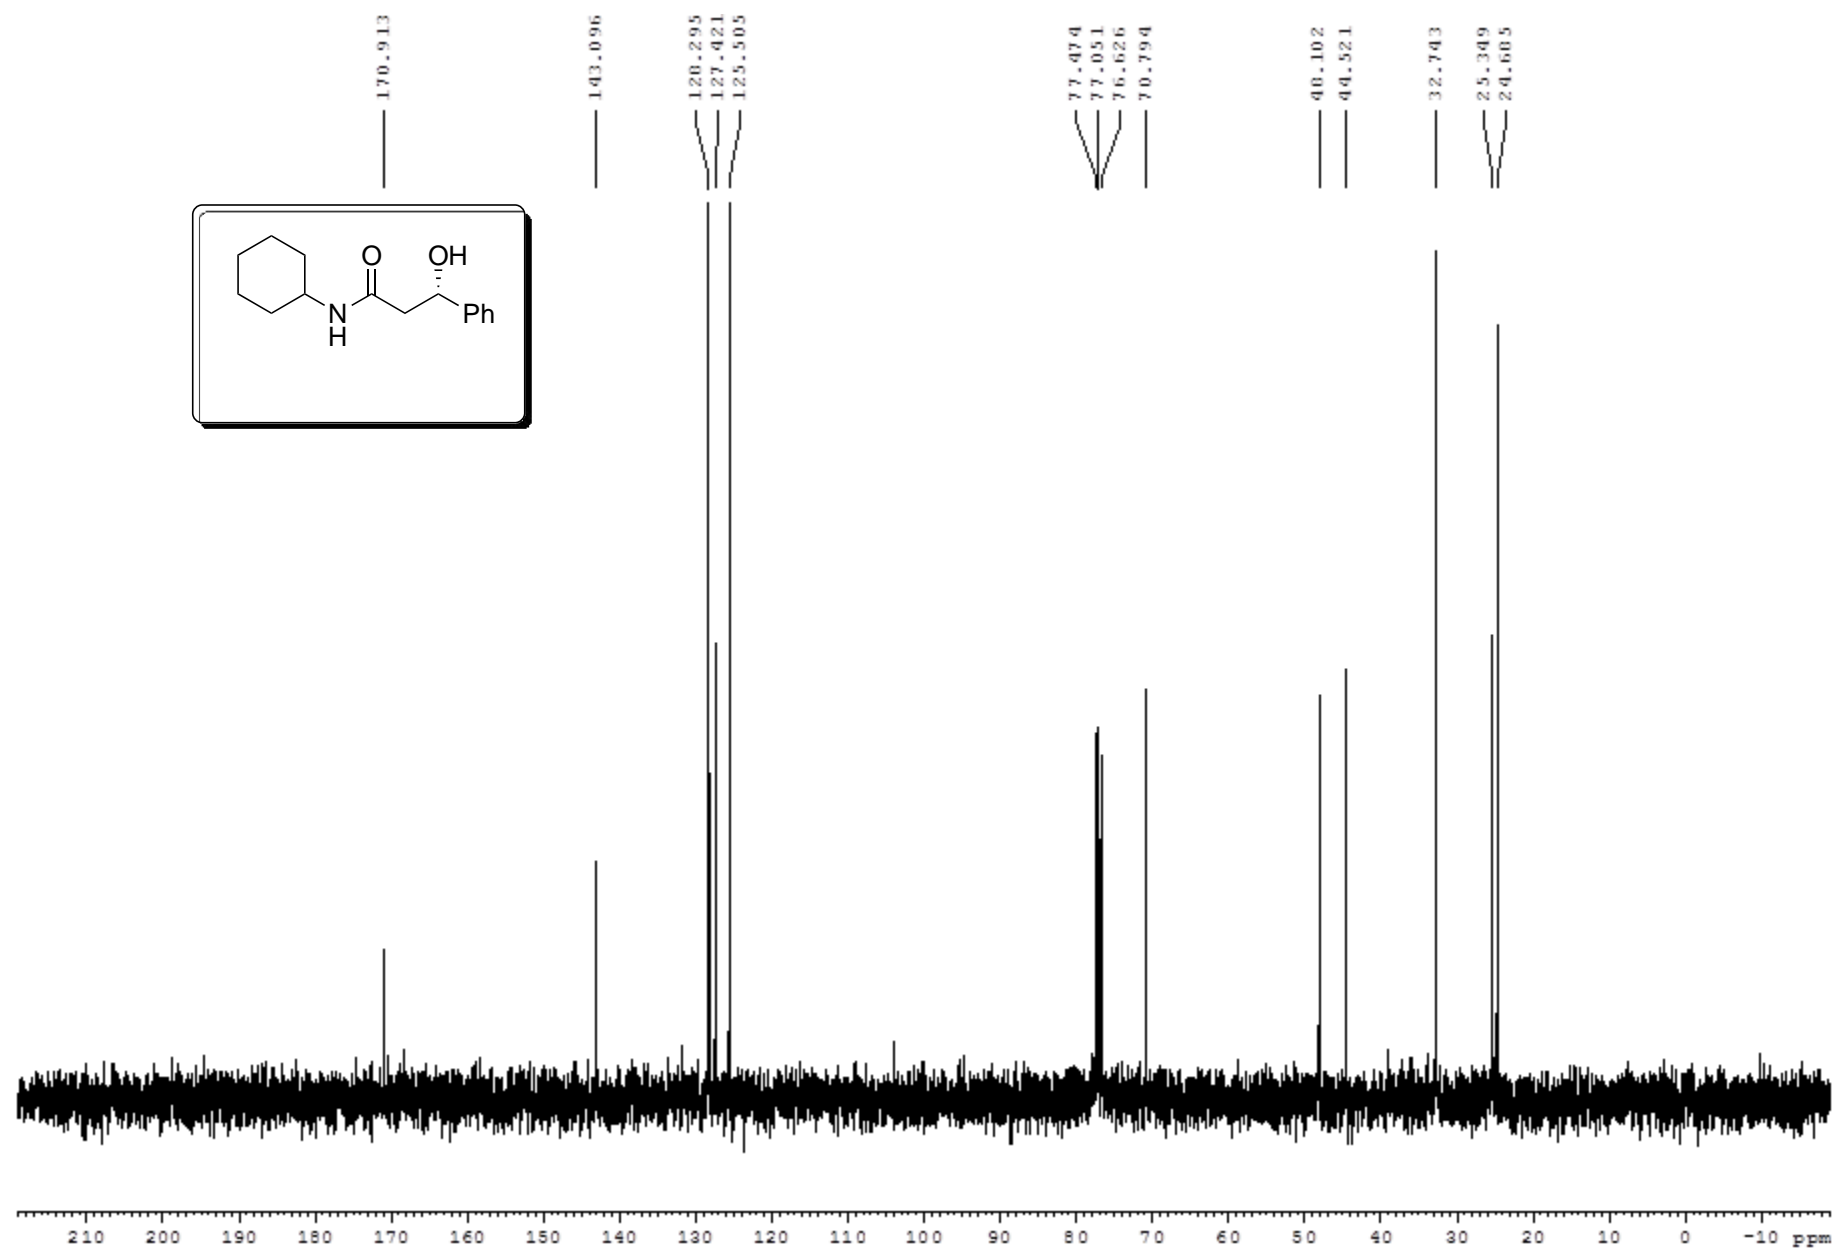

<sup>1</sup>H NMR (CDCl<sub>3</sub>, 500 MHz) spectrum of (S)- 3-Hydroxy-3-phenyl-1-(pyrrolidin-1-yl)propan-1-one (2n-OH)

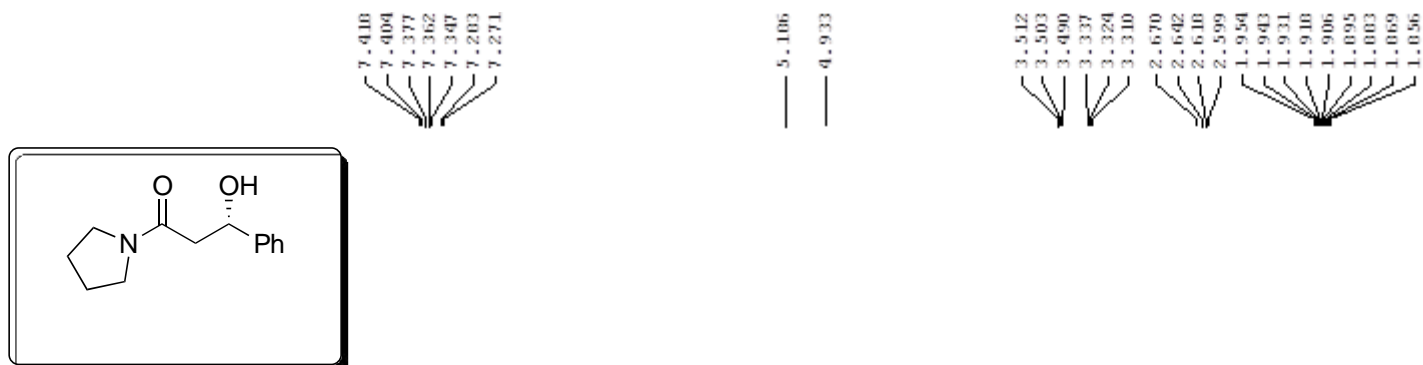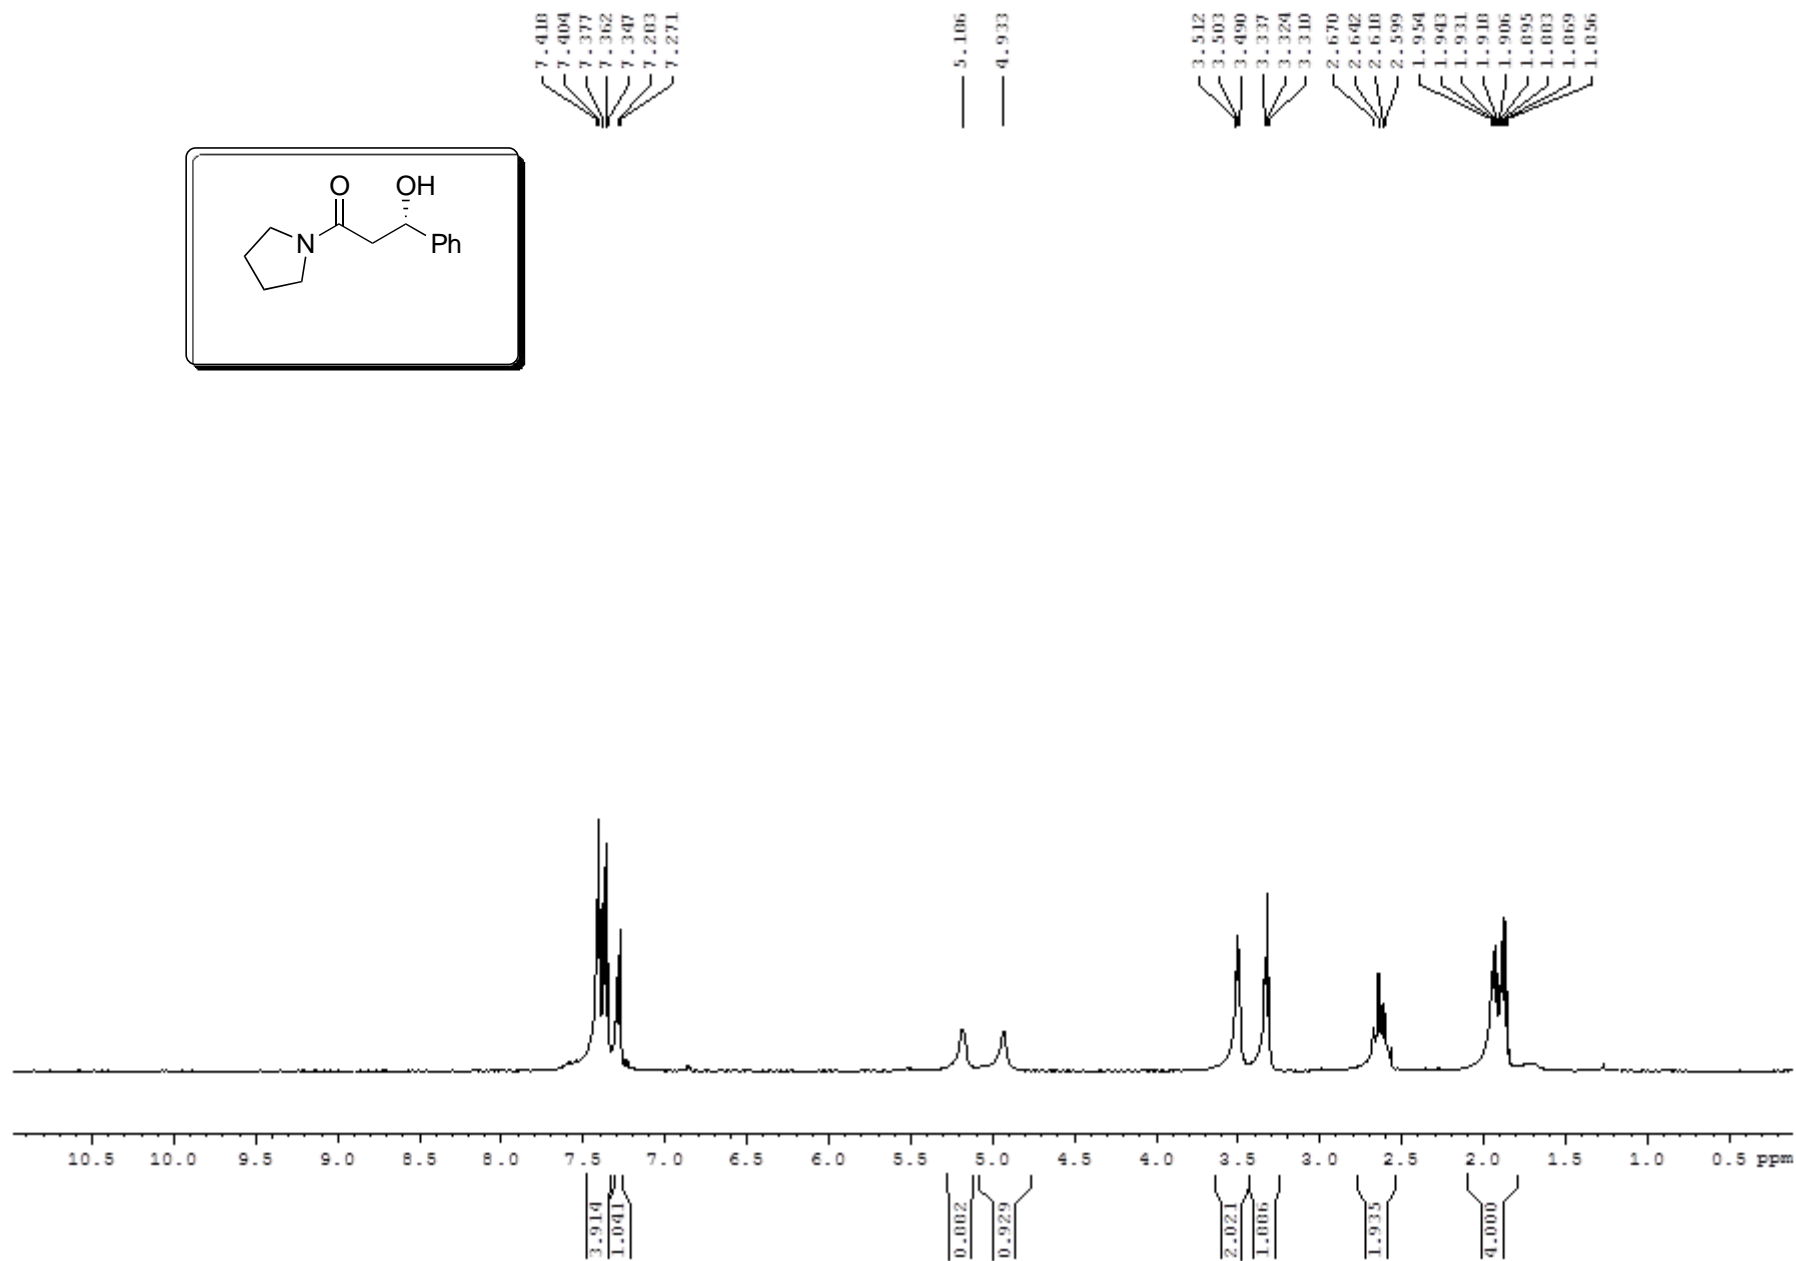

<sup>13</sup>C NMR (CDCl<sub>3</sub>, 125.8 MHz) spectrum of (*S*)-3-Hydroxy-3-phenyl-1-(pyrrolidin-1-yl)propan-1-one (2n-OH)

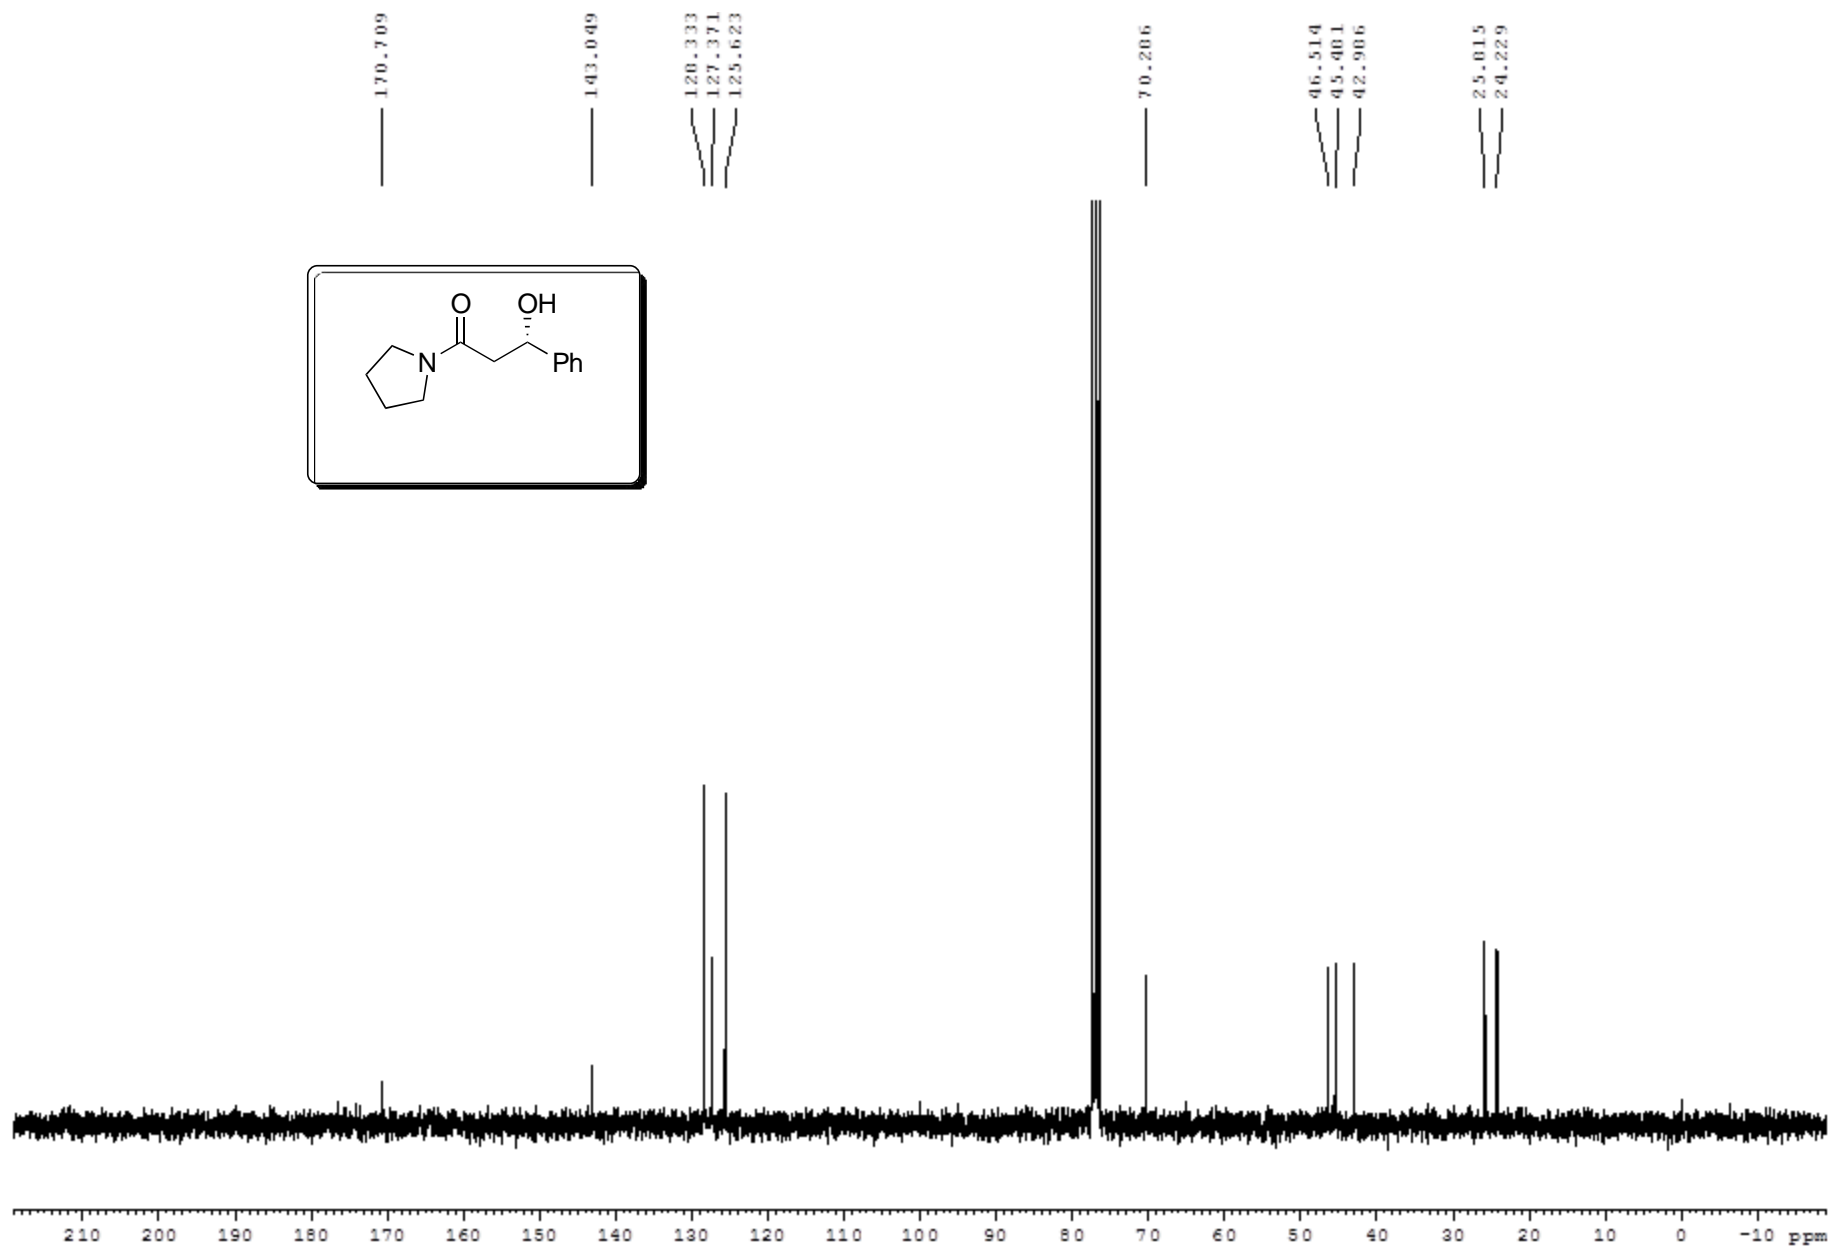

<sup>19</sup>F NMR (CDCl<sub>3</sub>, 383.8 MHz) spectrum of (*R*)- and (*S*)-MTPA ester of 3-Hydroxy-*N*-(4-methoxyphenyl)-3-phenylpropanamide

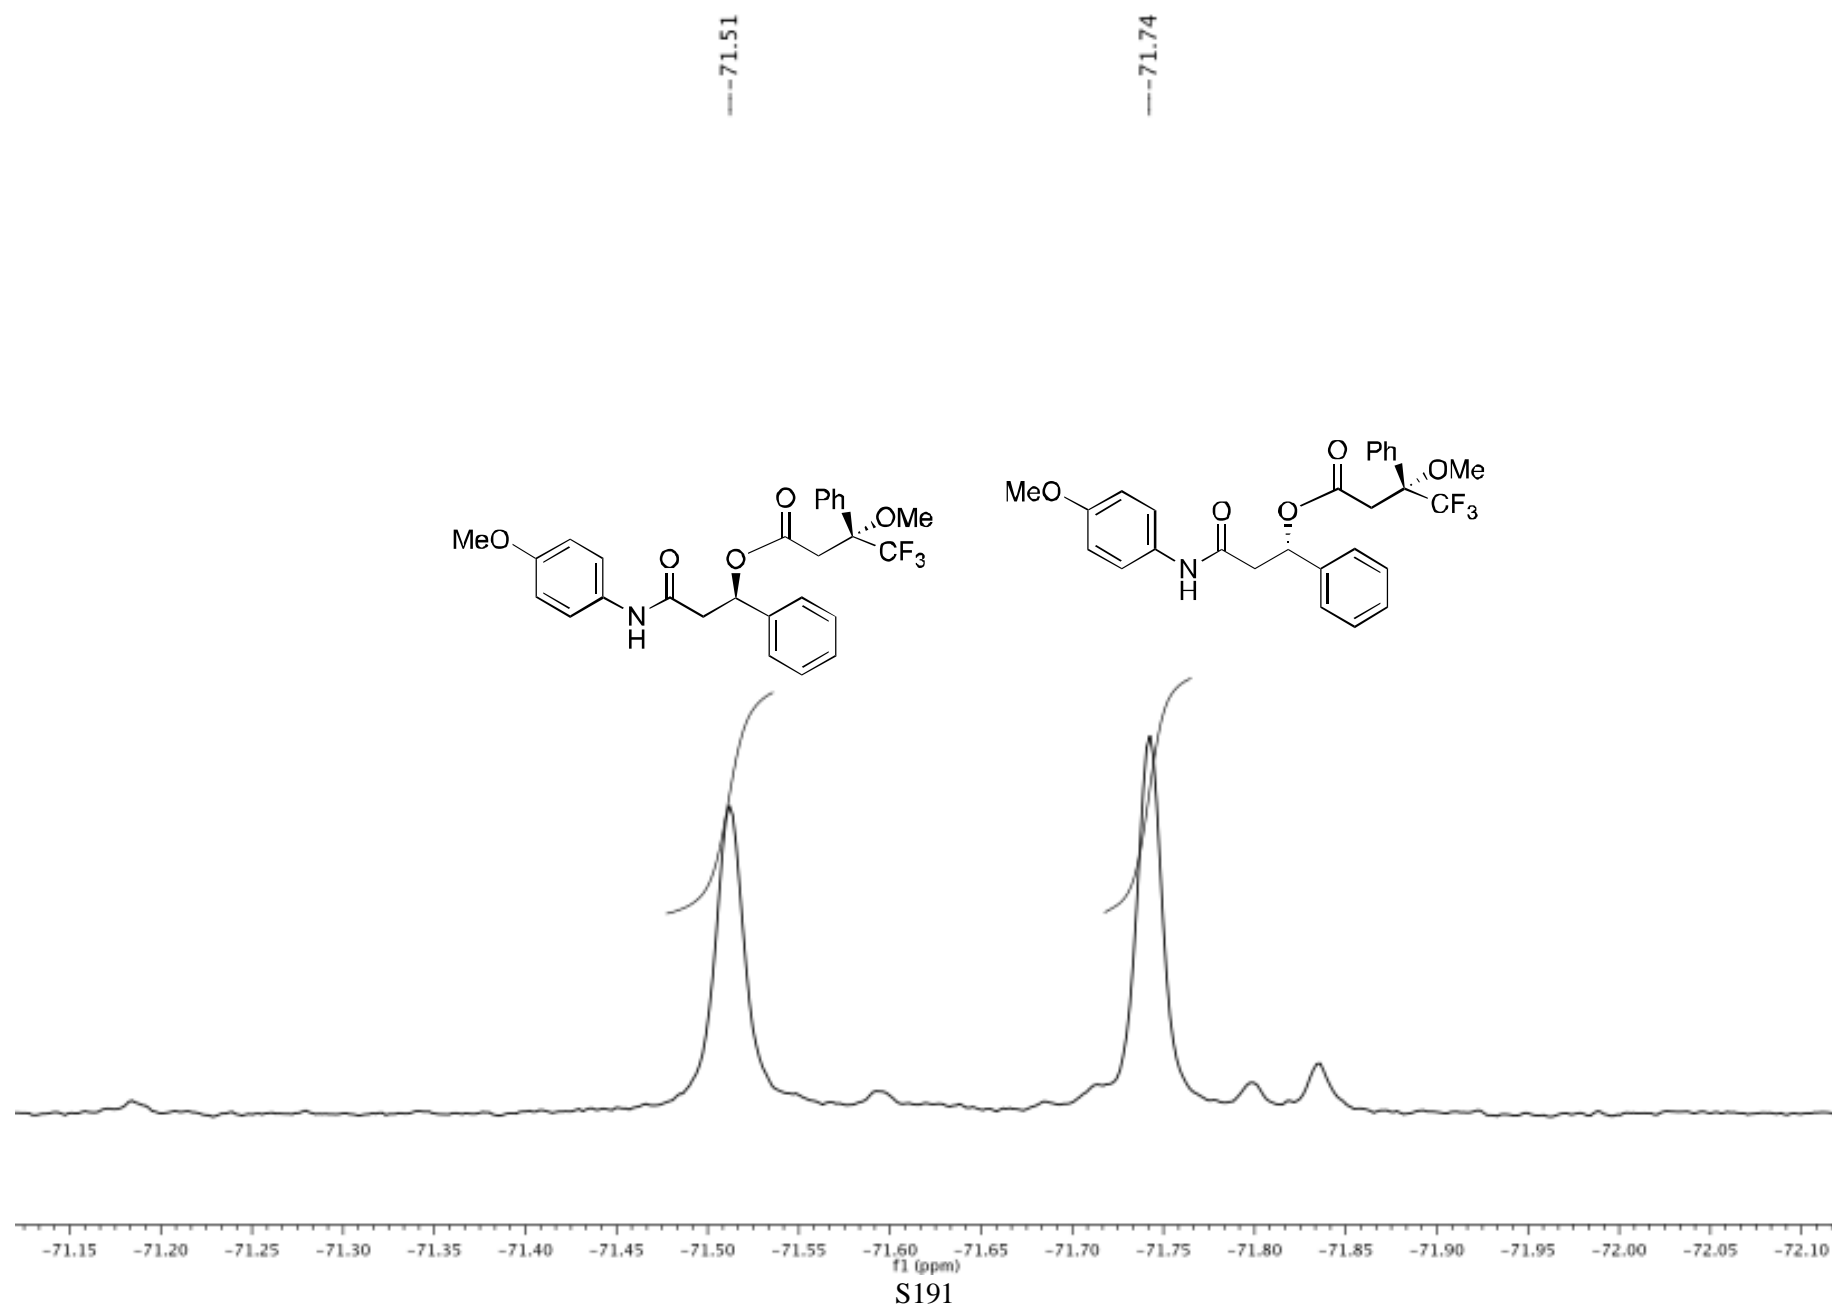

<sup>19</sup>F NMR (CDCl<sub>3</sub>, 383.8 MHz) spectrum of (*R*)- and (*S*)-MTPA ester of (*S*)-3-Hydroxy-*N*-(4-methoxyphenyl)-3-phenylpropanamide

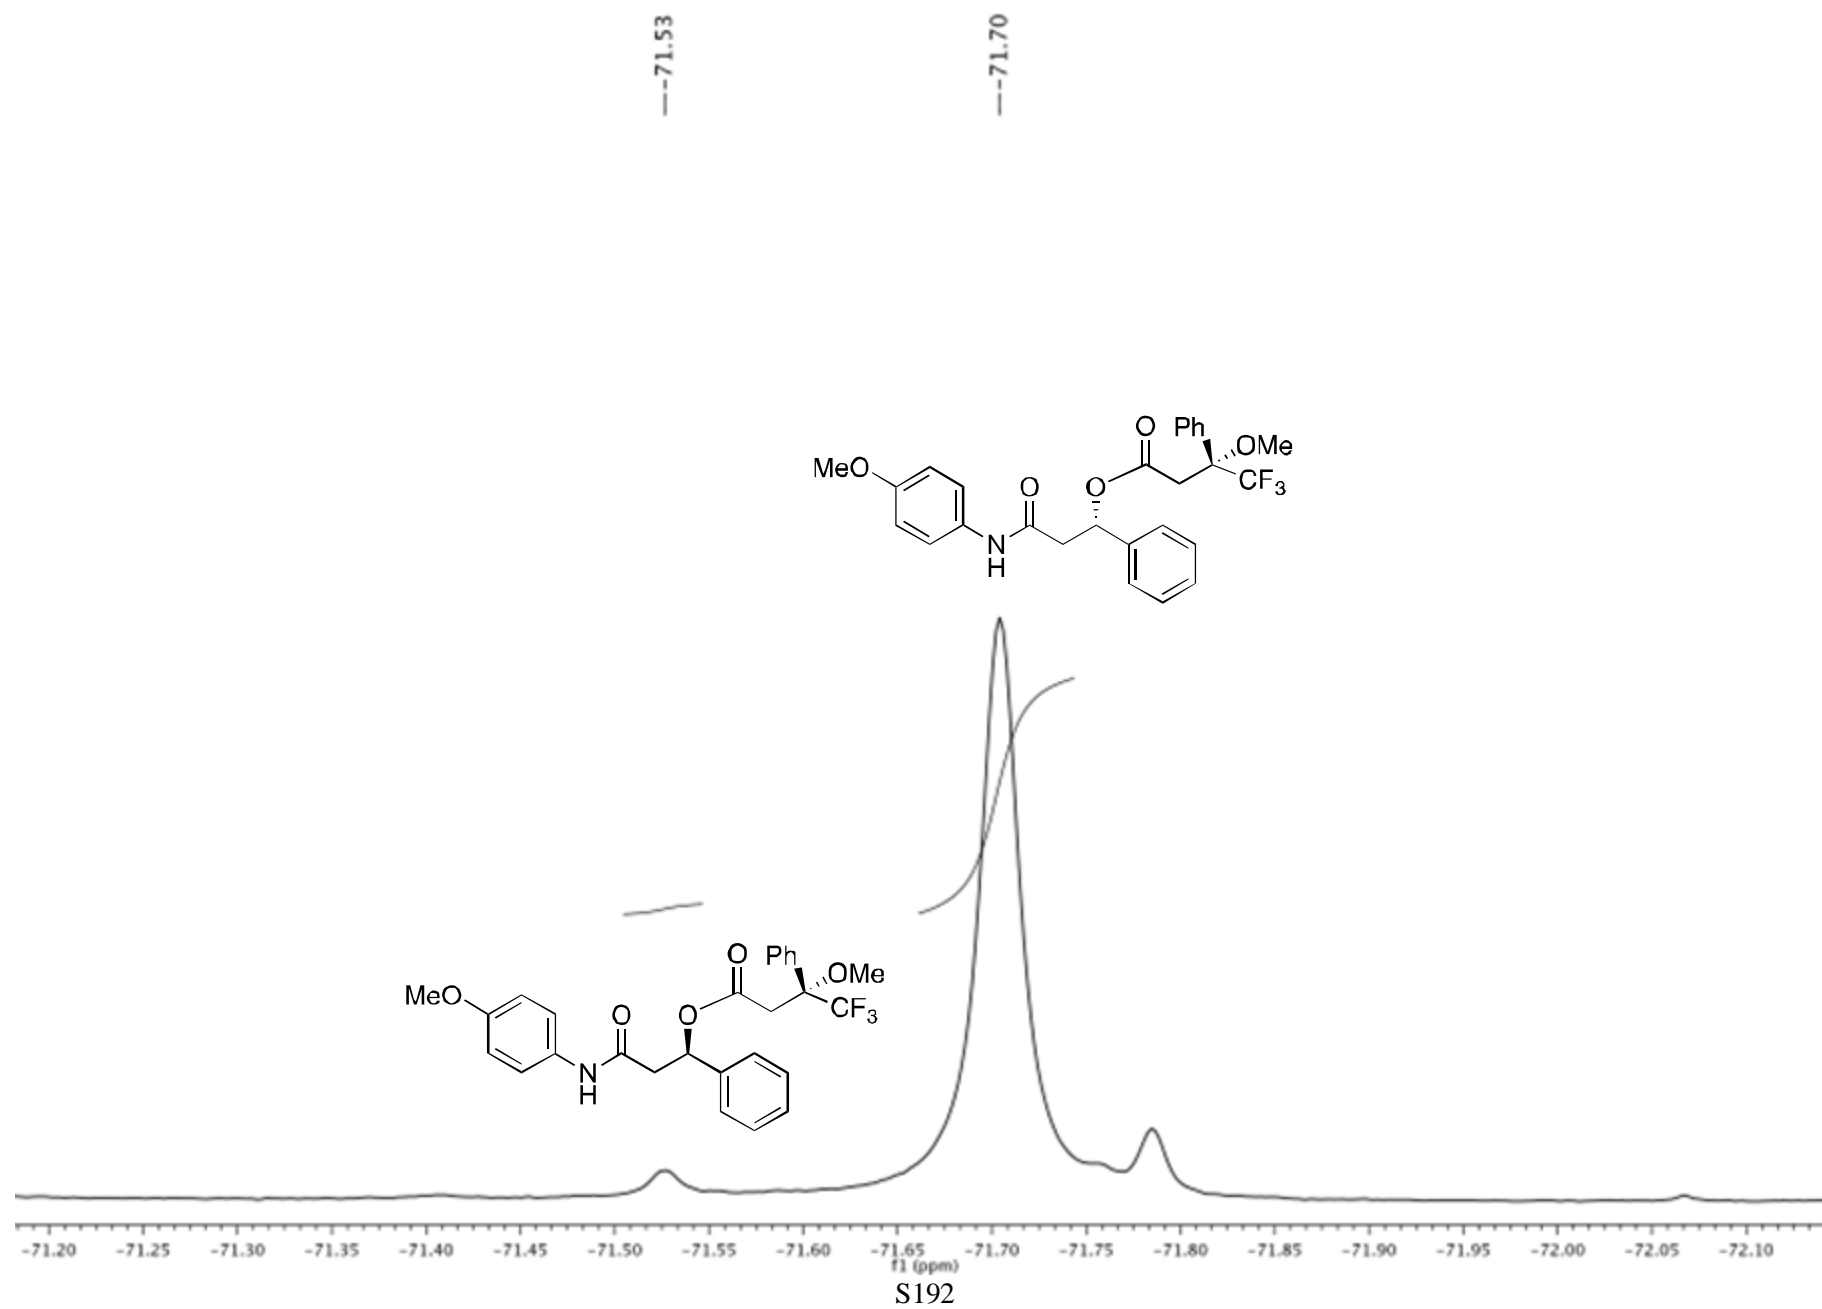



$^1\text{H}$  NMR ( $\text{CDCl}_3$ , 300 MHz) spectrum of ethyl-(*R*)-3-hydroxybutanoate (7a-OH)

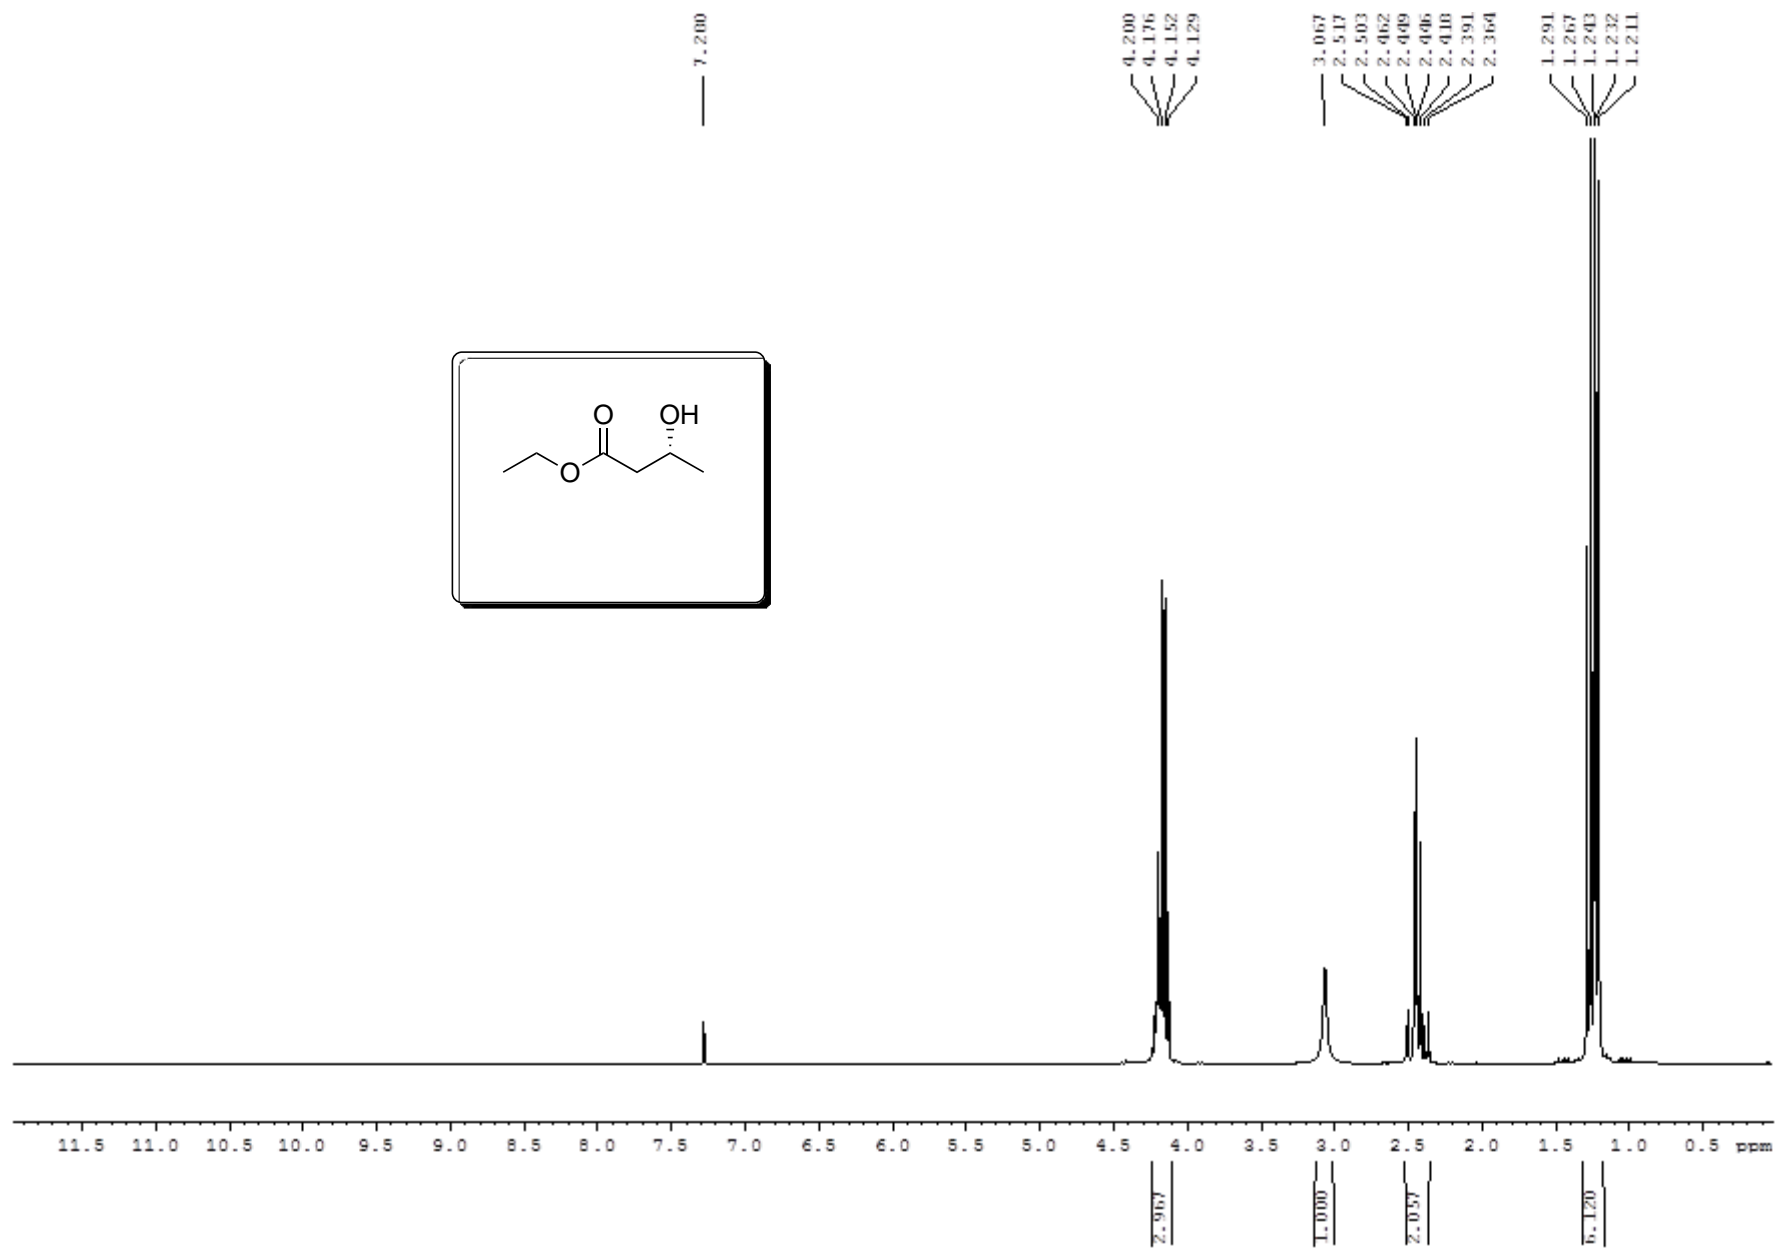

<sup>13</sup>C NMR (CDCl<sub>3</sub>, 75.4 MHz) spectrum of ethyl-(*R*)-3-hydroxybutanoate (7a-OH)

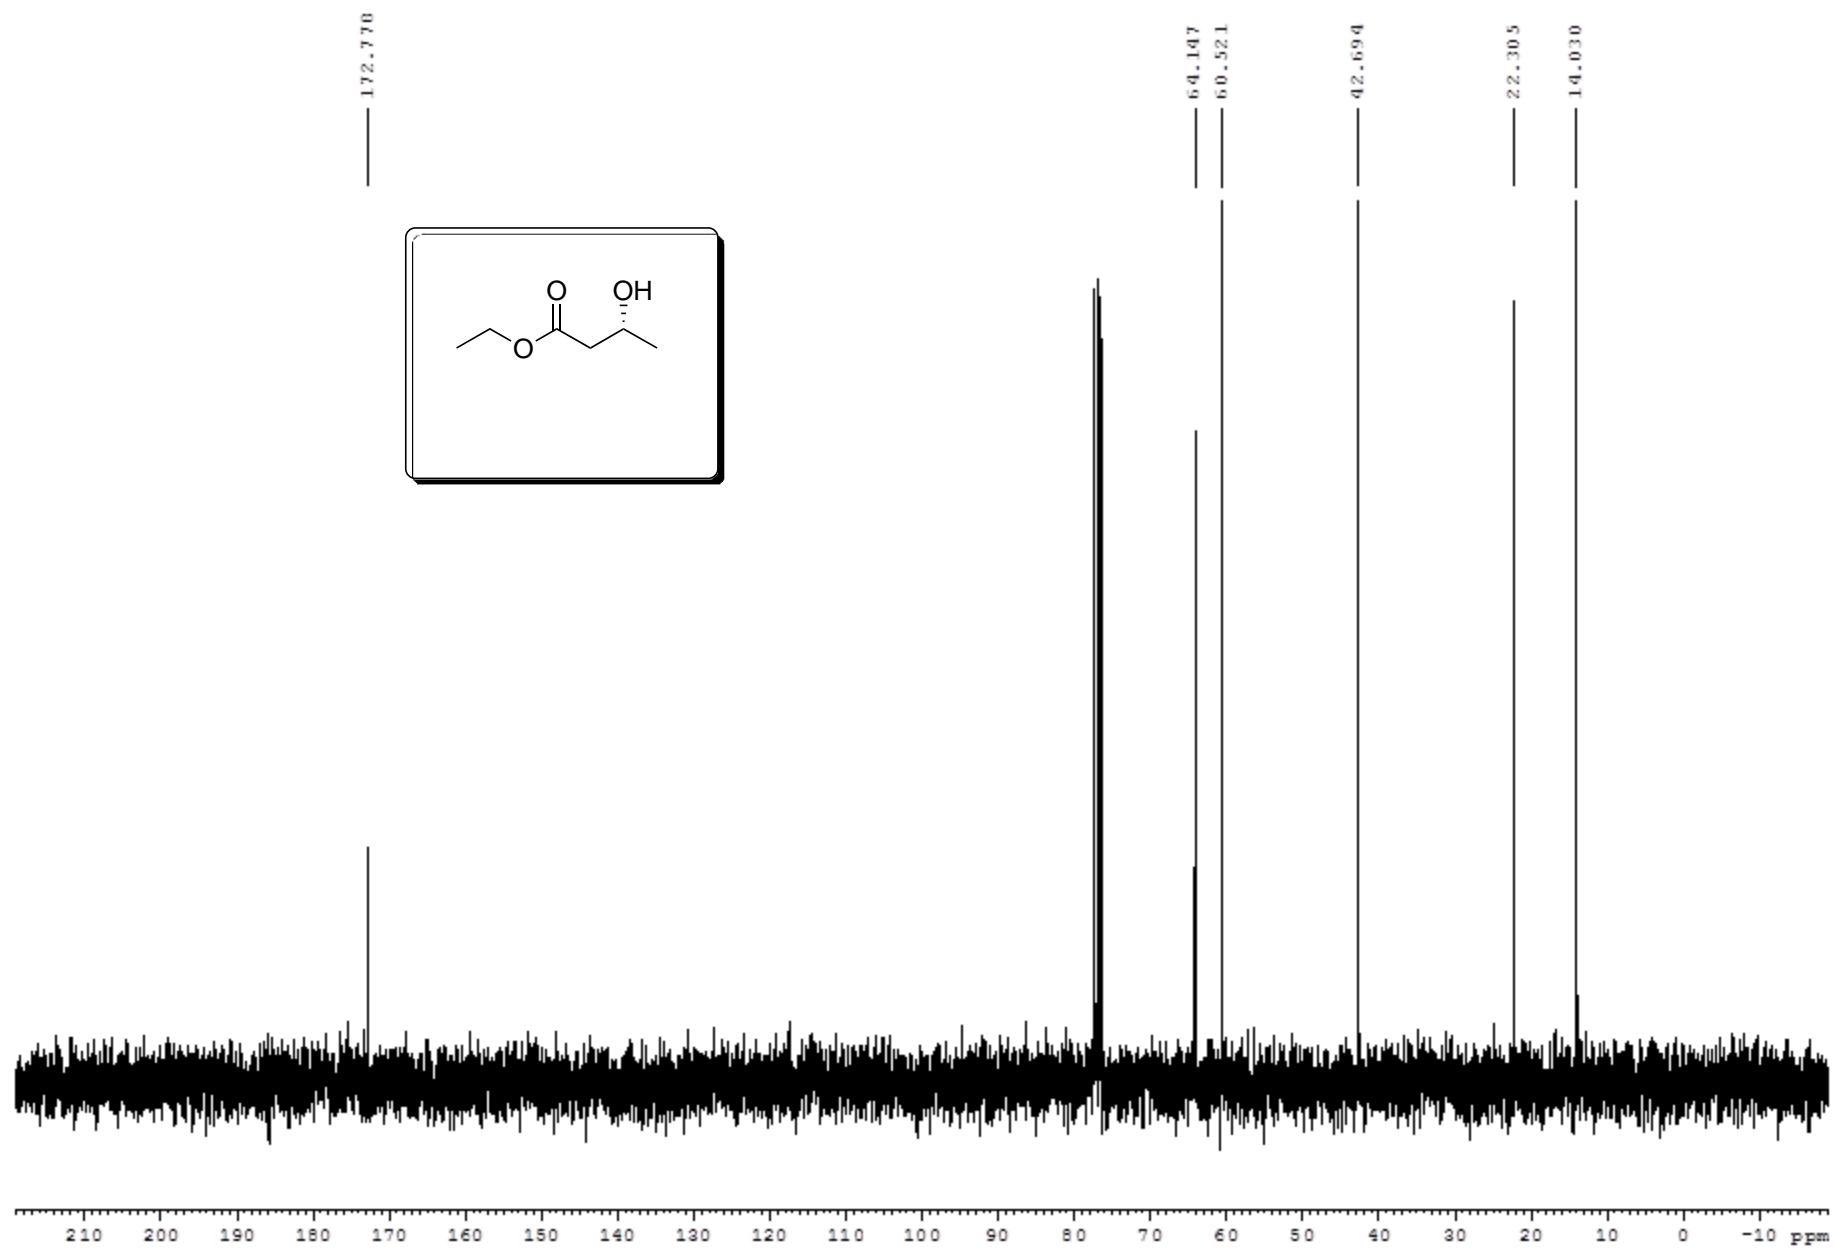

$^1\text{H}$  NMR ( $\text{CDCl}_3$ , 300 MHz) spectrum of Ethyl (*R*)-3-hydroxyoctanoate (7b-OH)

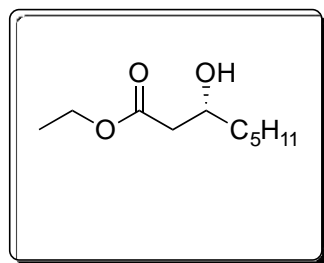

4.176  
4.002  
3.010  
2.491  
2.404  
1.420  
1.206  
0.007

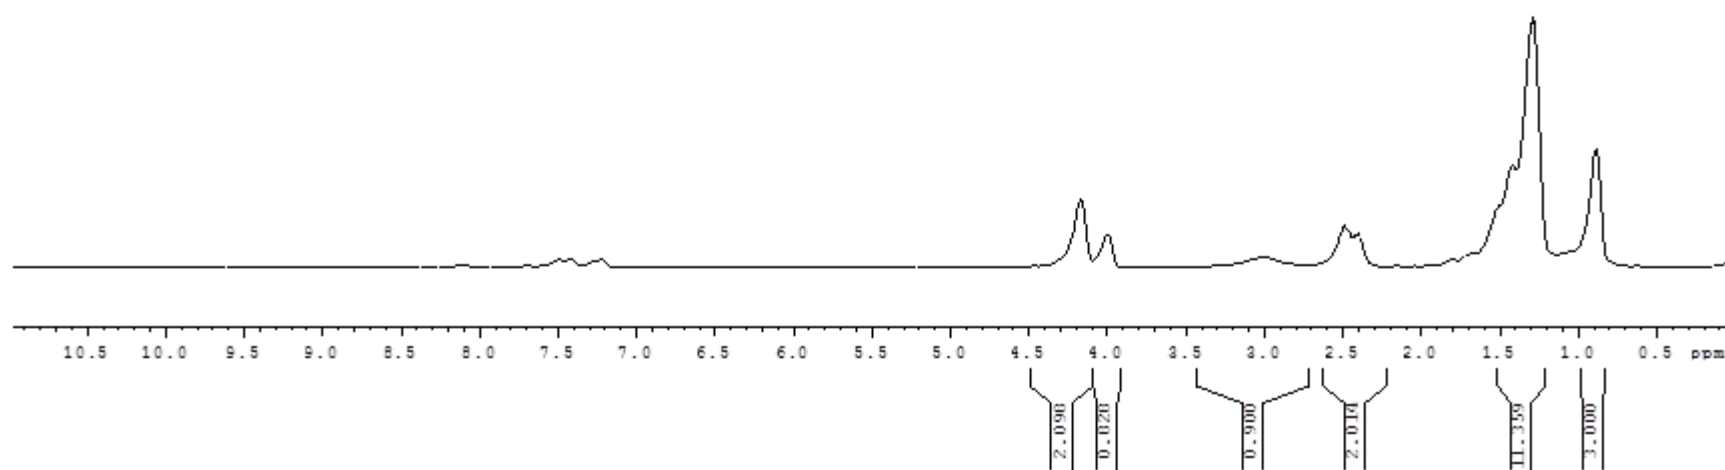

<sup>13</sup>C NMR (CDCl<sub>3</sub>, 75.4 MHz) spectrum of Ethyl (*R*)-3-hydroxyoctanoate (7b-OH)

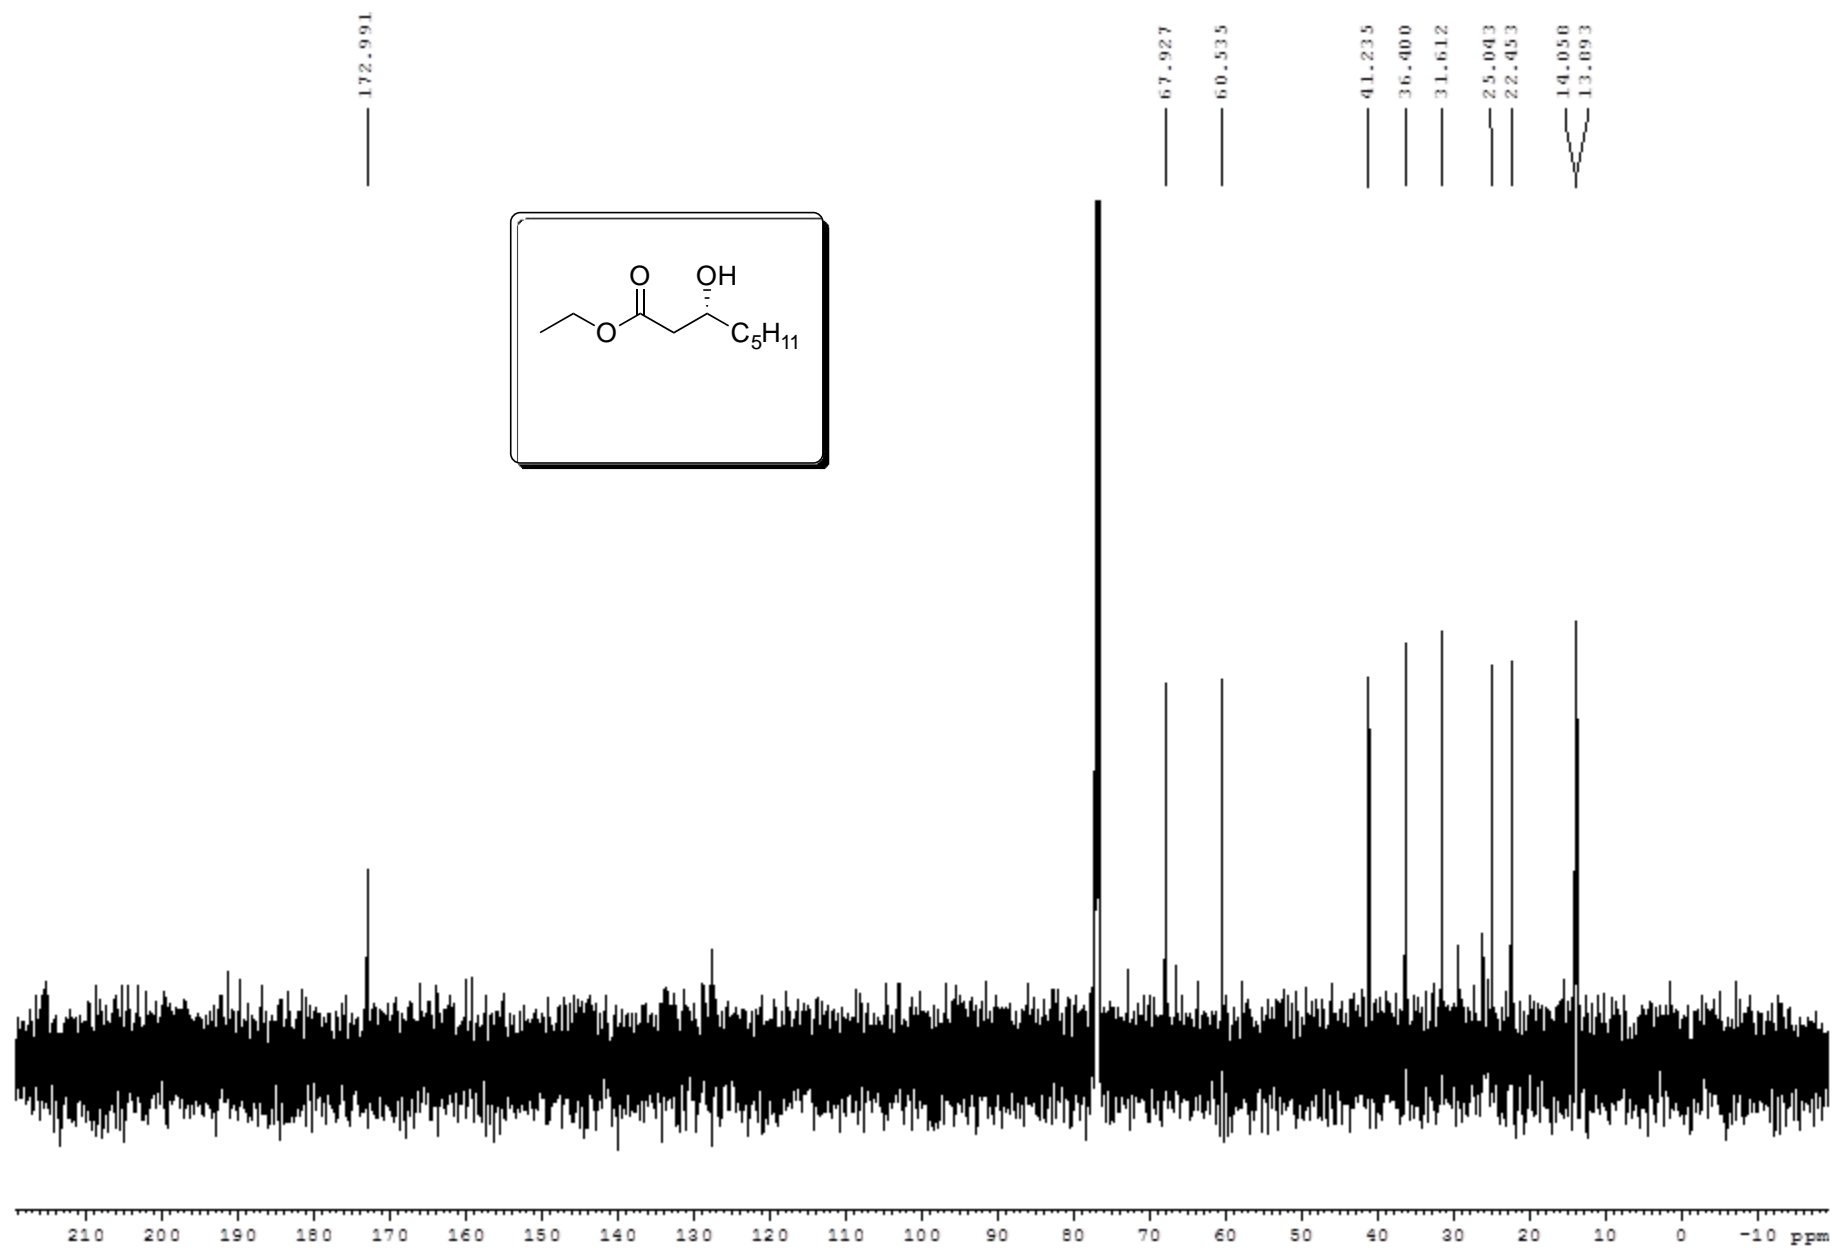

$^1\text{H}$  NMR ( $\text{CDCl}_3$ , 300 MHz) spectrum of (*R*)-3-Hydroxy-1-phenylbutan-1-one (7c-OH)

7.972  
7.947  
7.942  
7.500  
7.564  
7.490  
7.472  
7.440

4.407  
4.436  
4.426  
4.416  
4.407  
4.397  
4.387

3.402  
3.209  
3.190  
3.150  
3.139  
3.099  
3.071  
3.040  
3.012

1.320  
1.299

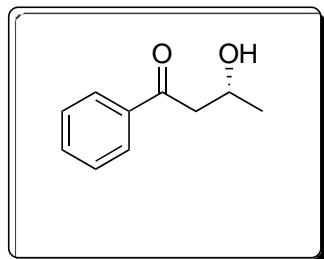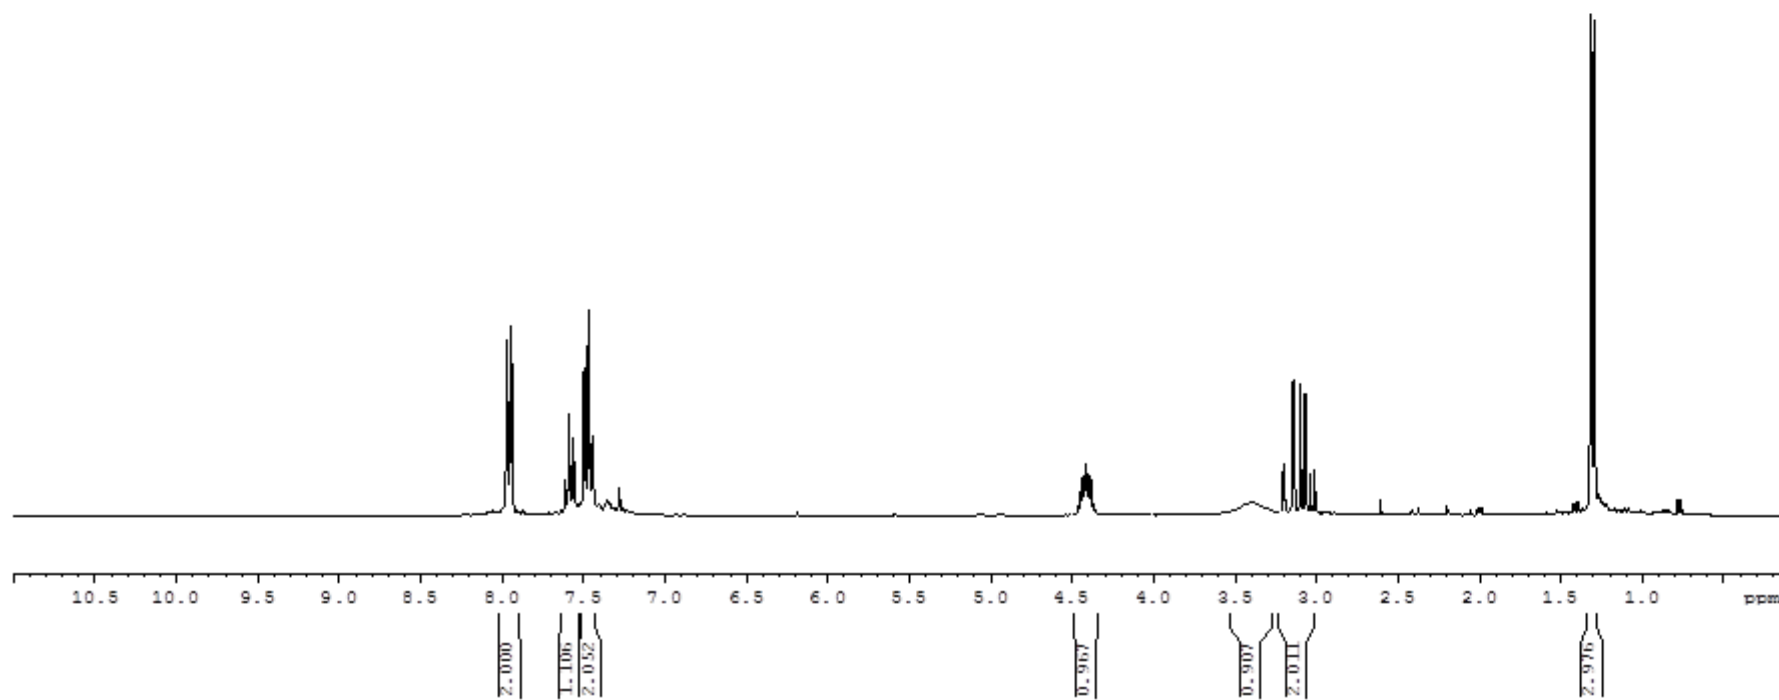

<sup>13</sup>C NMR (CDCl<sub>3</sub>, 75.4 MHz) spectrum of (*R*)-3-Hydroxy-1-phenylbutan-1-one (7c-OH)

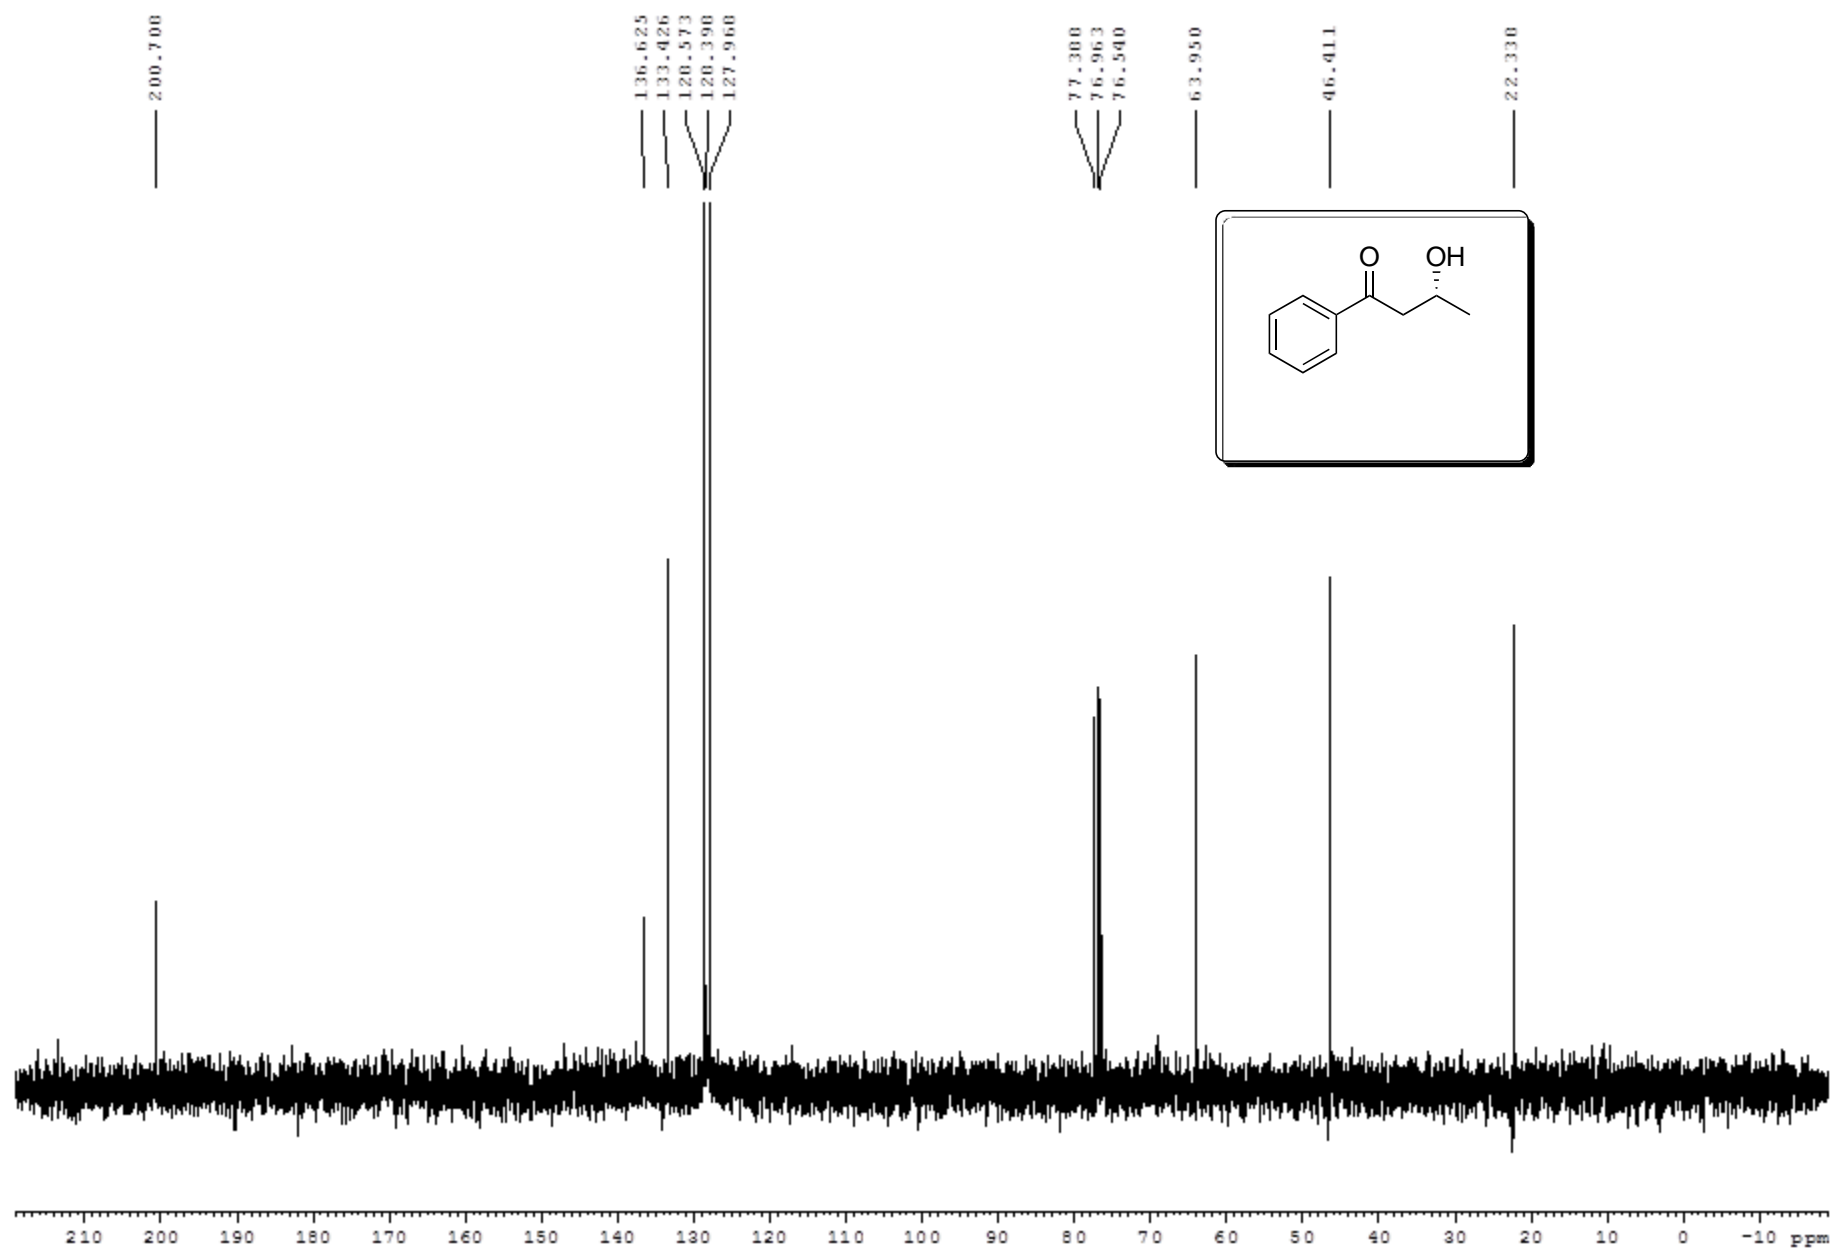

<sup>1</sup>H NMR (CDCl<sub>3</sub>, 360 MHz) spectrum of (S)-3-hydroxy-1,3-diphenylpropan-1-one (7d-OH)

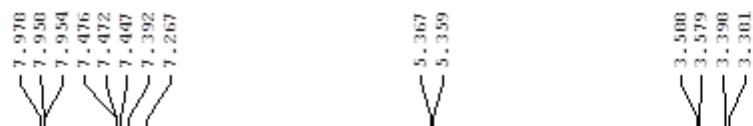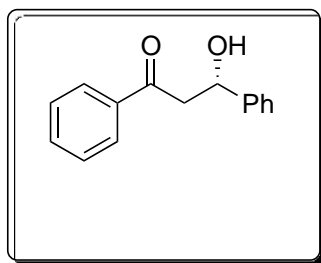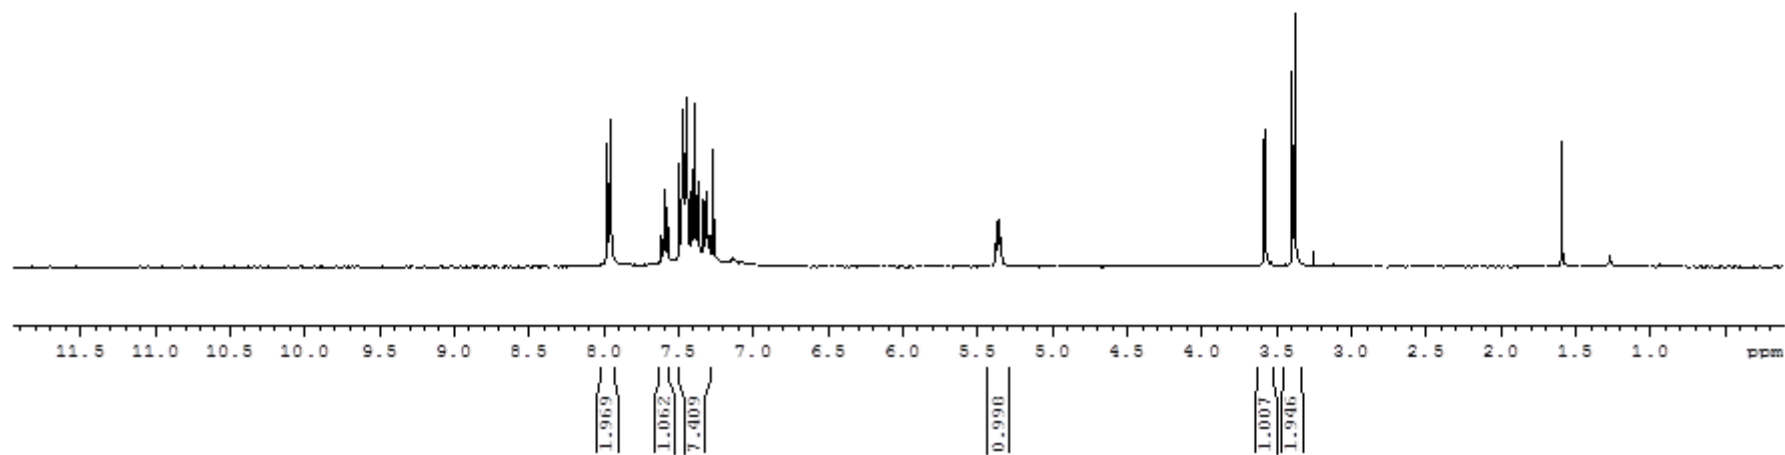

<sup>13</sup>C NMR (CDCl<sub>3</sub>, 90.5 MHz) spectrum of (*S*)-3-hydroxy-1,3-diphenylpropan-1-one (7d-OH)

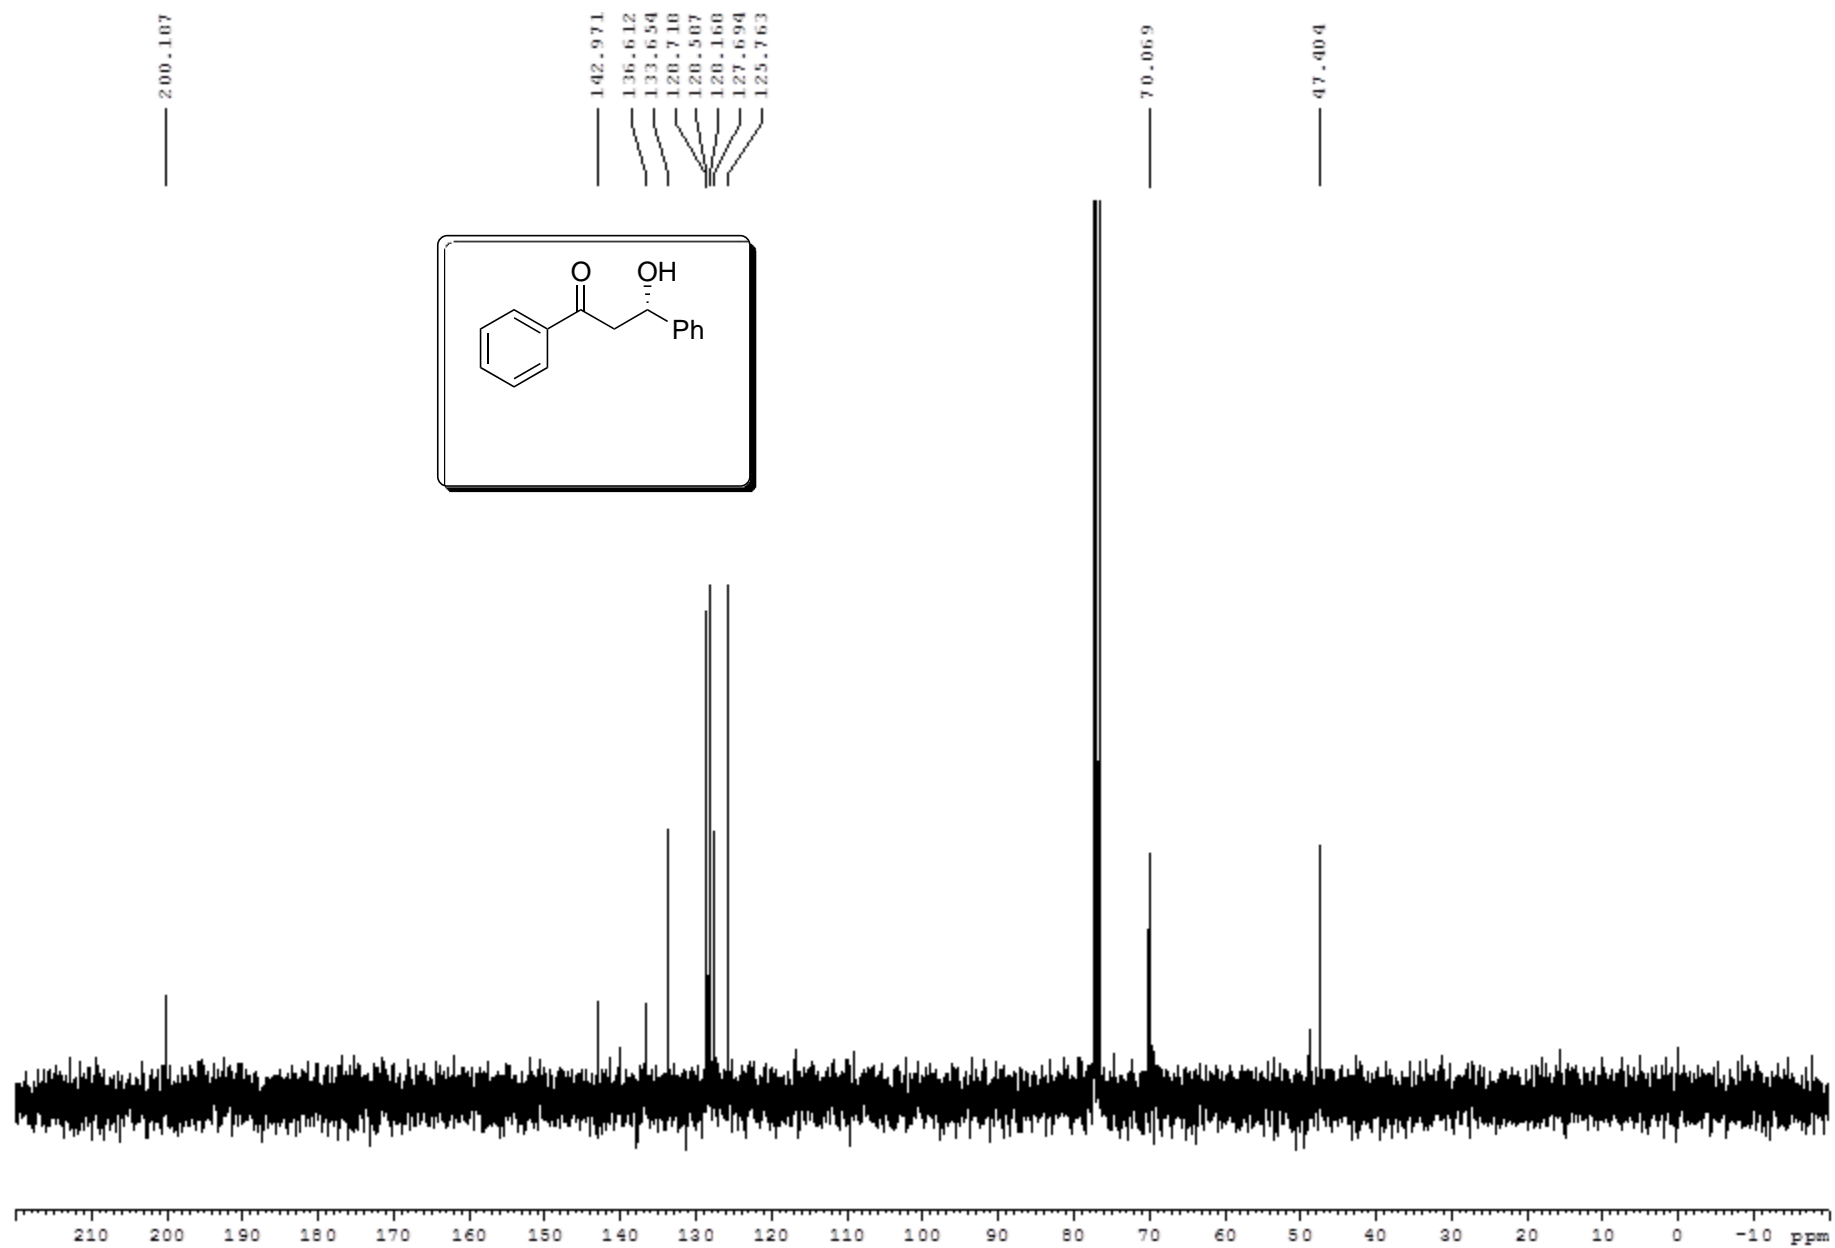



$^1\text{H}$  NMR ( $\text{CDCl}_3$ , 500 MHz) spectrum of (*R*)-3-Hydroxycyclohexane-1-one (7e-OH)

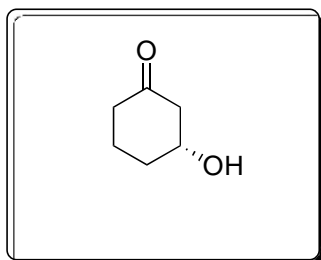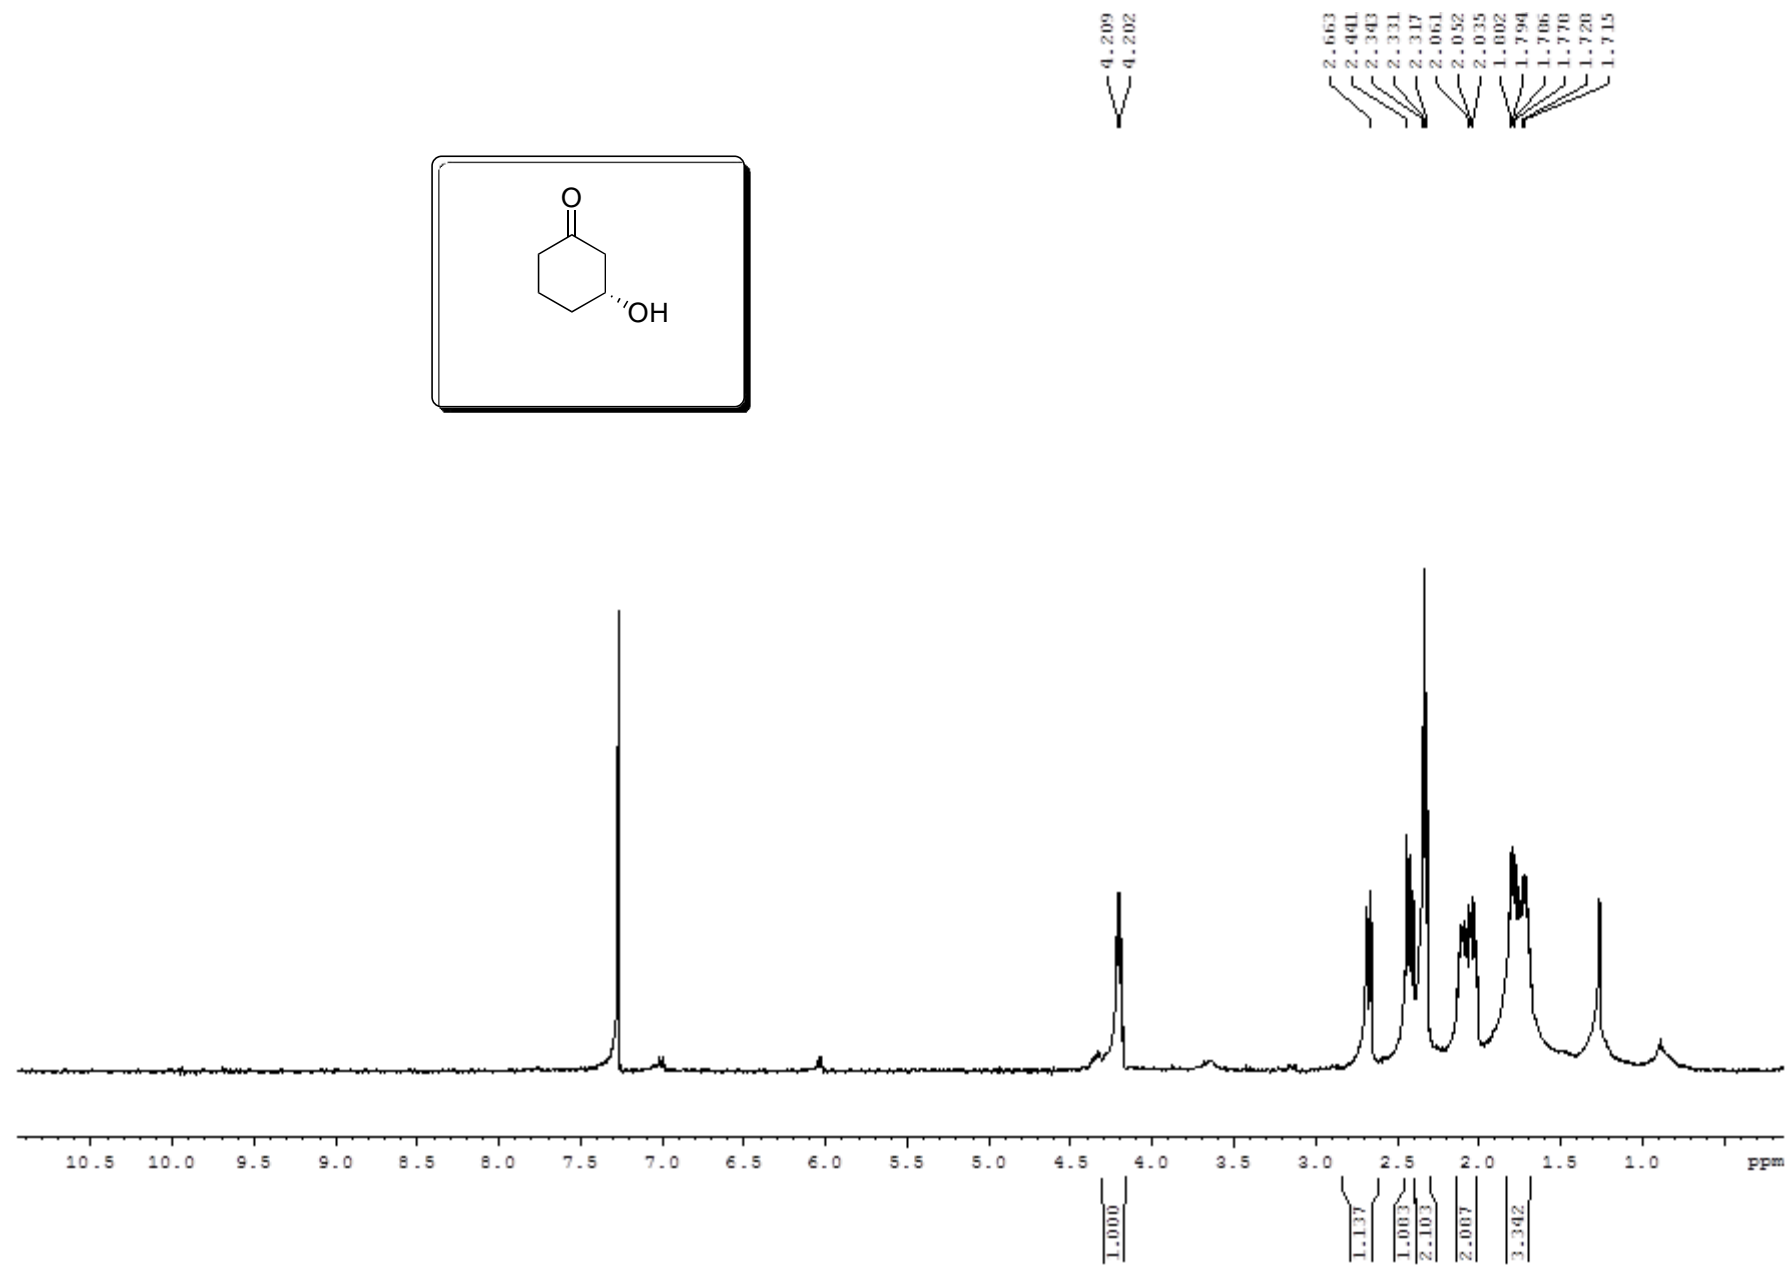

<sup>13</sup>C NMR (CDCl<sub>3</sub>, 125.8 MHz) spectrum of (*R*)-3-Hydroxycyclohexane-1-one (7e-OH)

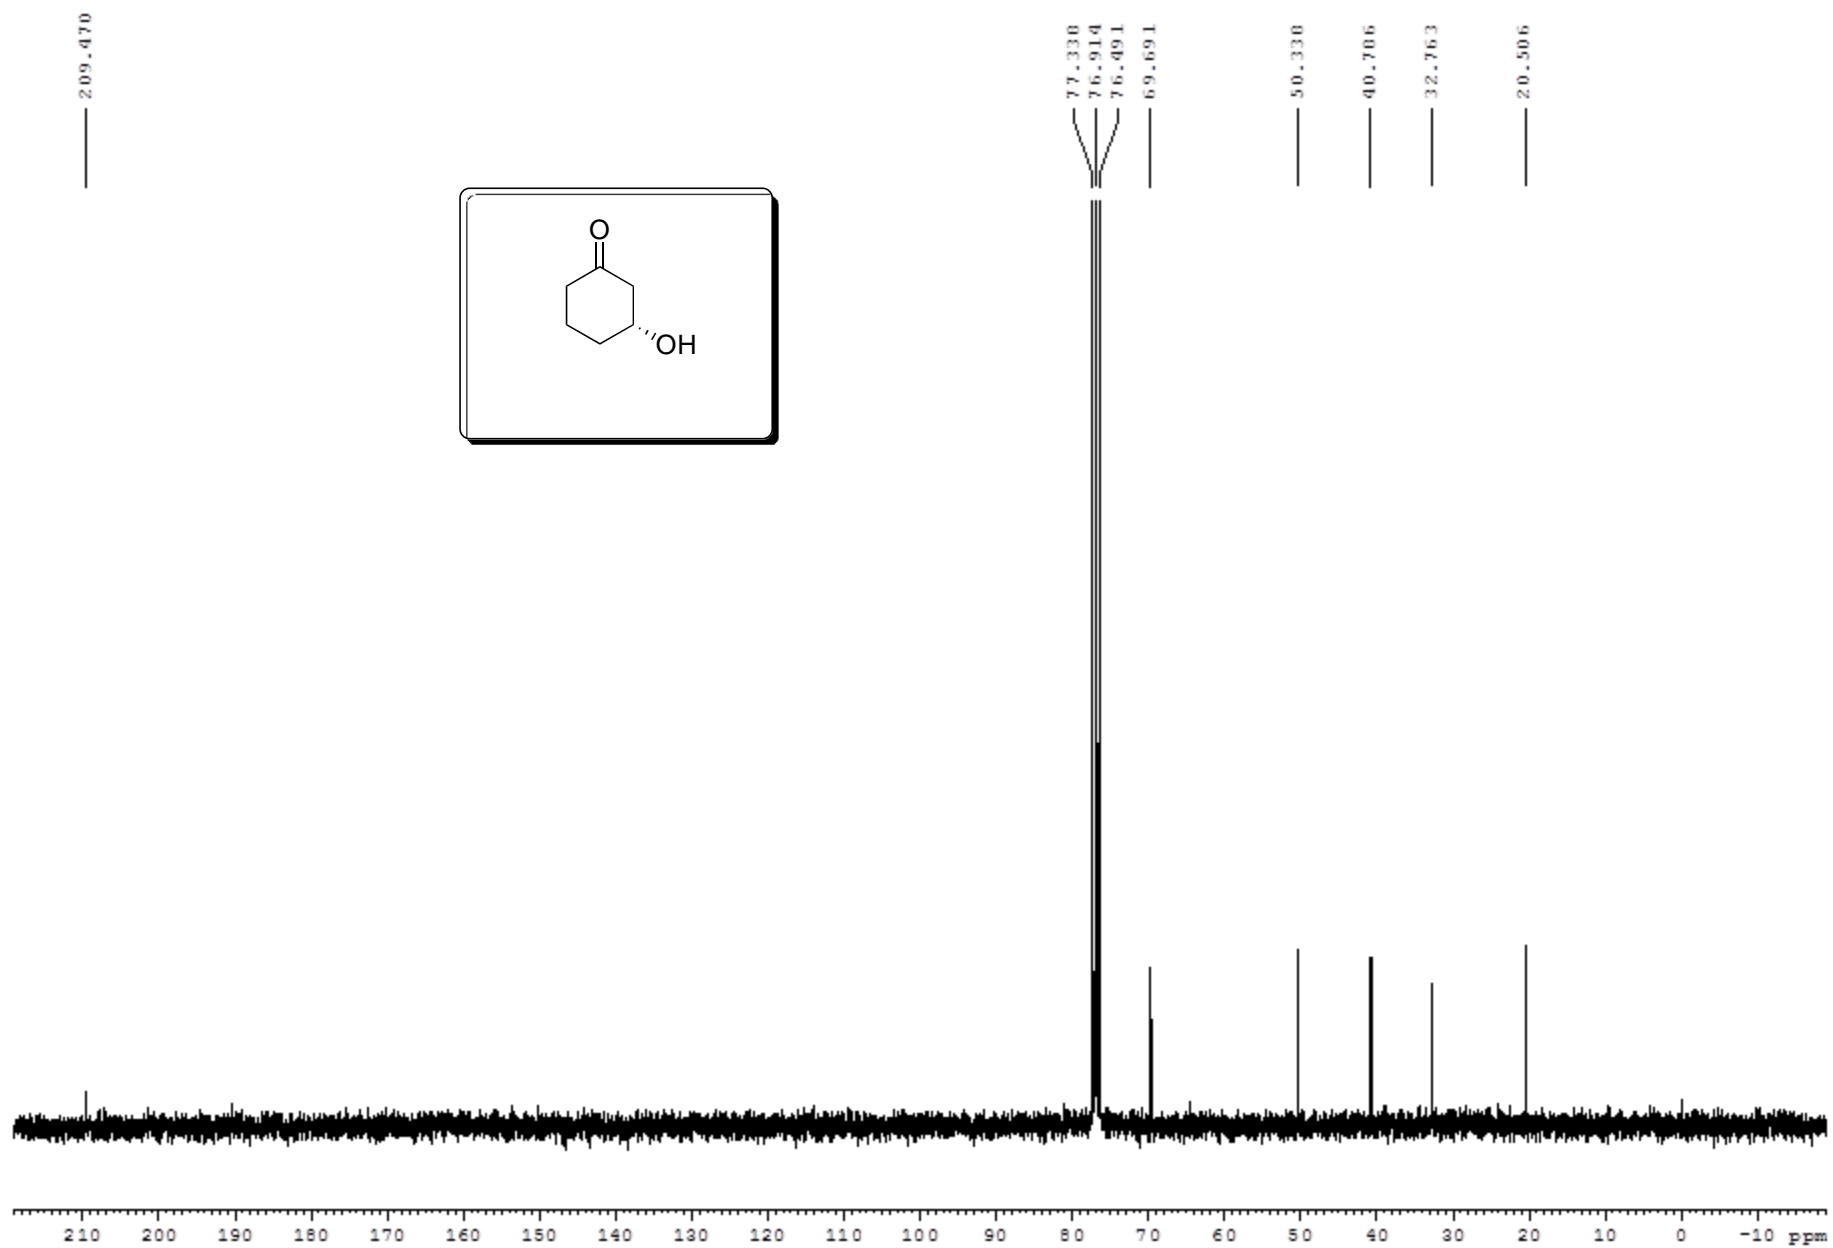

<sup>19</sup>F NMR (CDCl<sub>3</sub>, 383.8 MHz) spectrum of (*R*)- and (*S*)-MTPA ester of (*S*)-3-Hydroxy-*N*-(4-methoxyphenyl)-3-phenylpropanamide

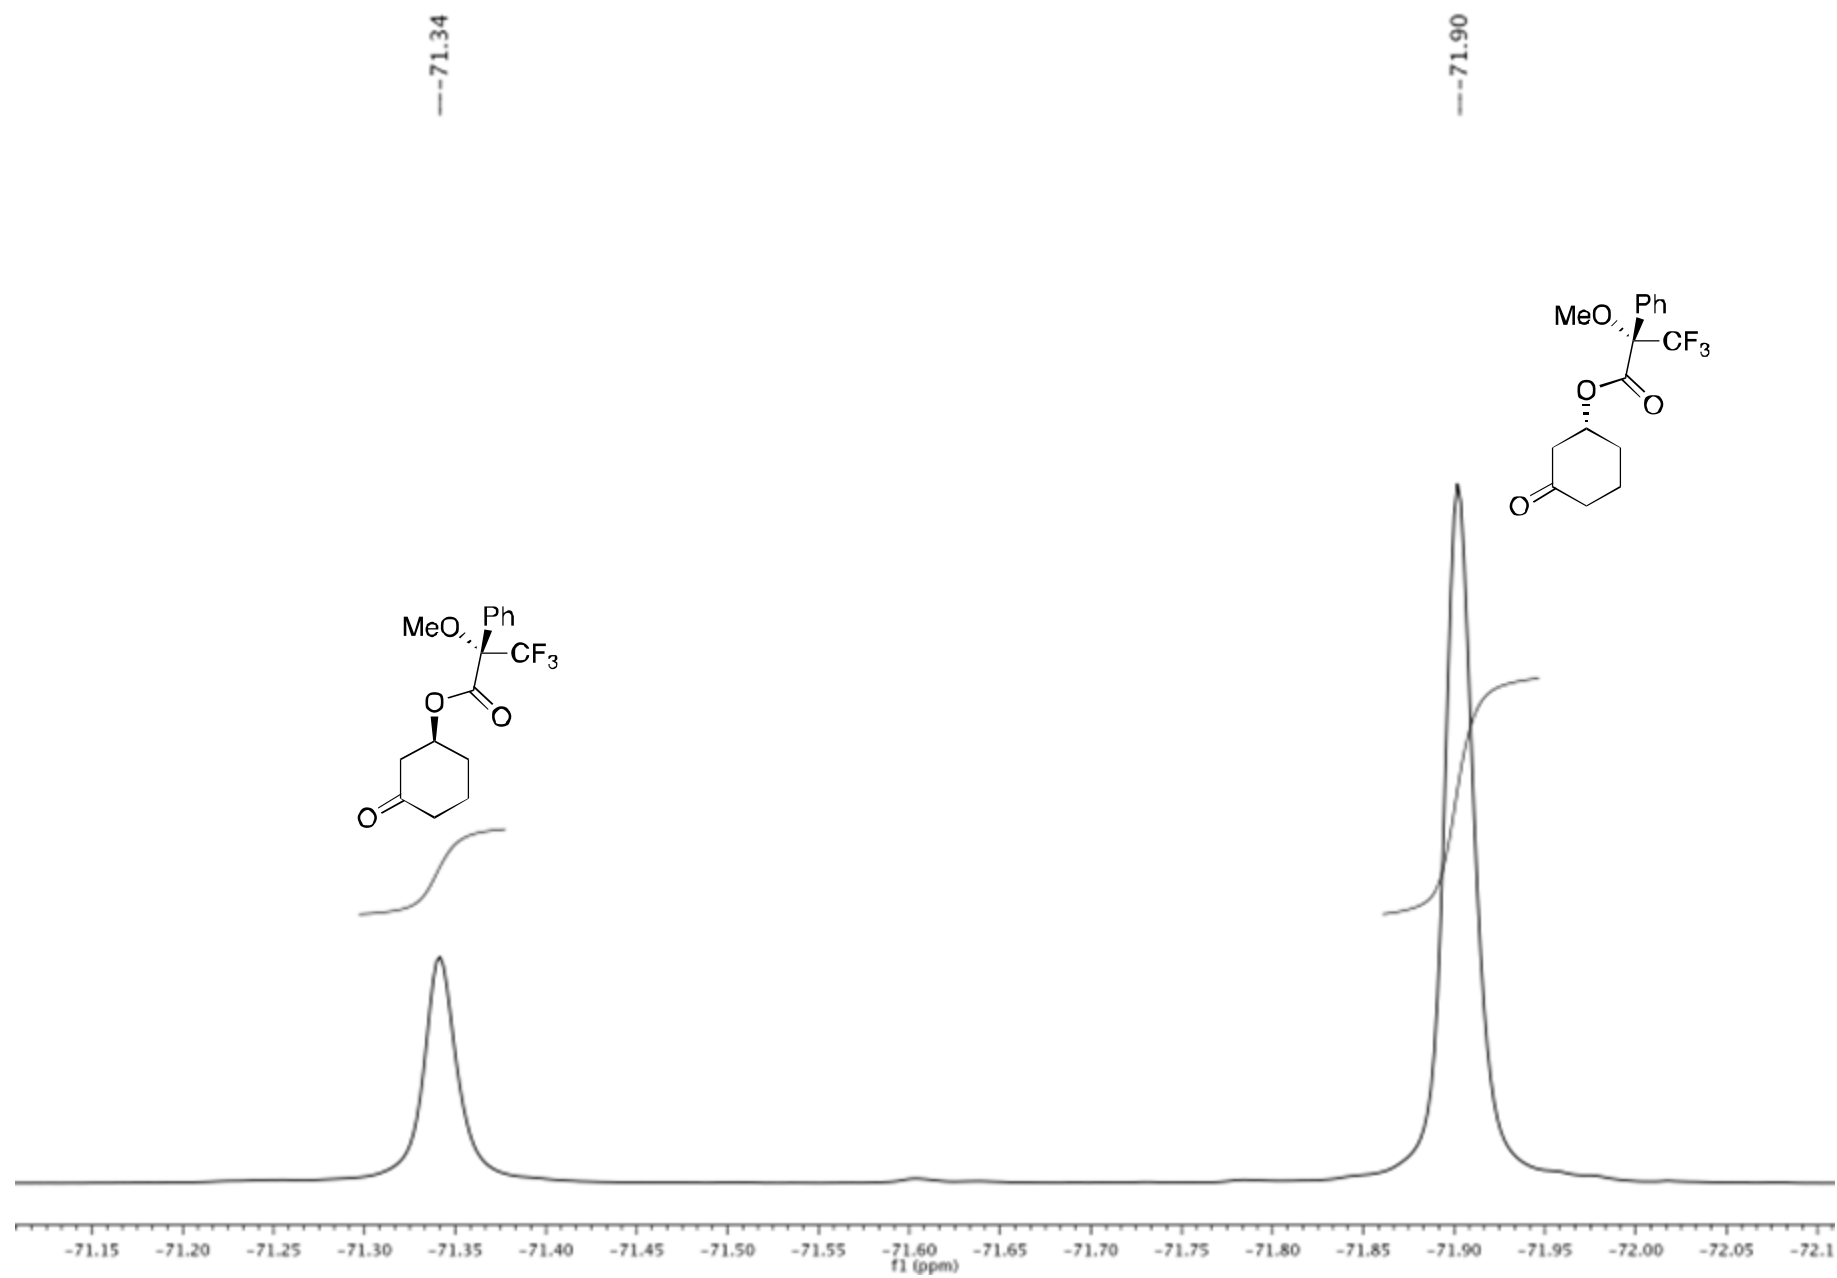

<sup>1</sup>H NMR (CDCl<sub>3</sub>, 300 MHz) spectrum of (S)-N-(4-Methoxyphenyl)-3-(pyridin-3-yl)butanamide (12a)

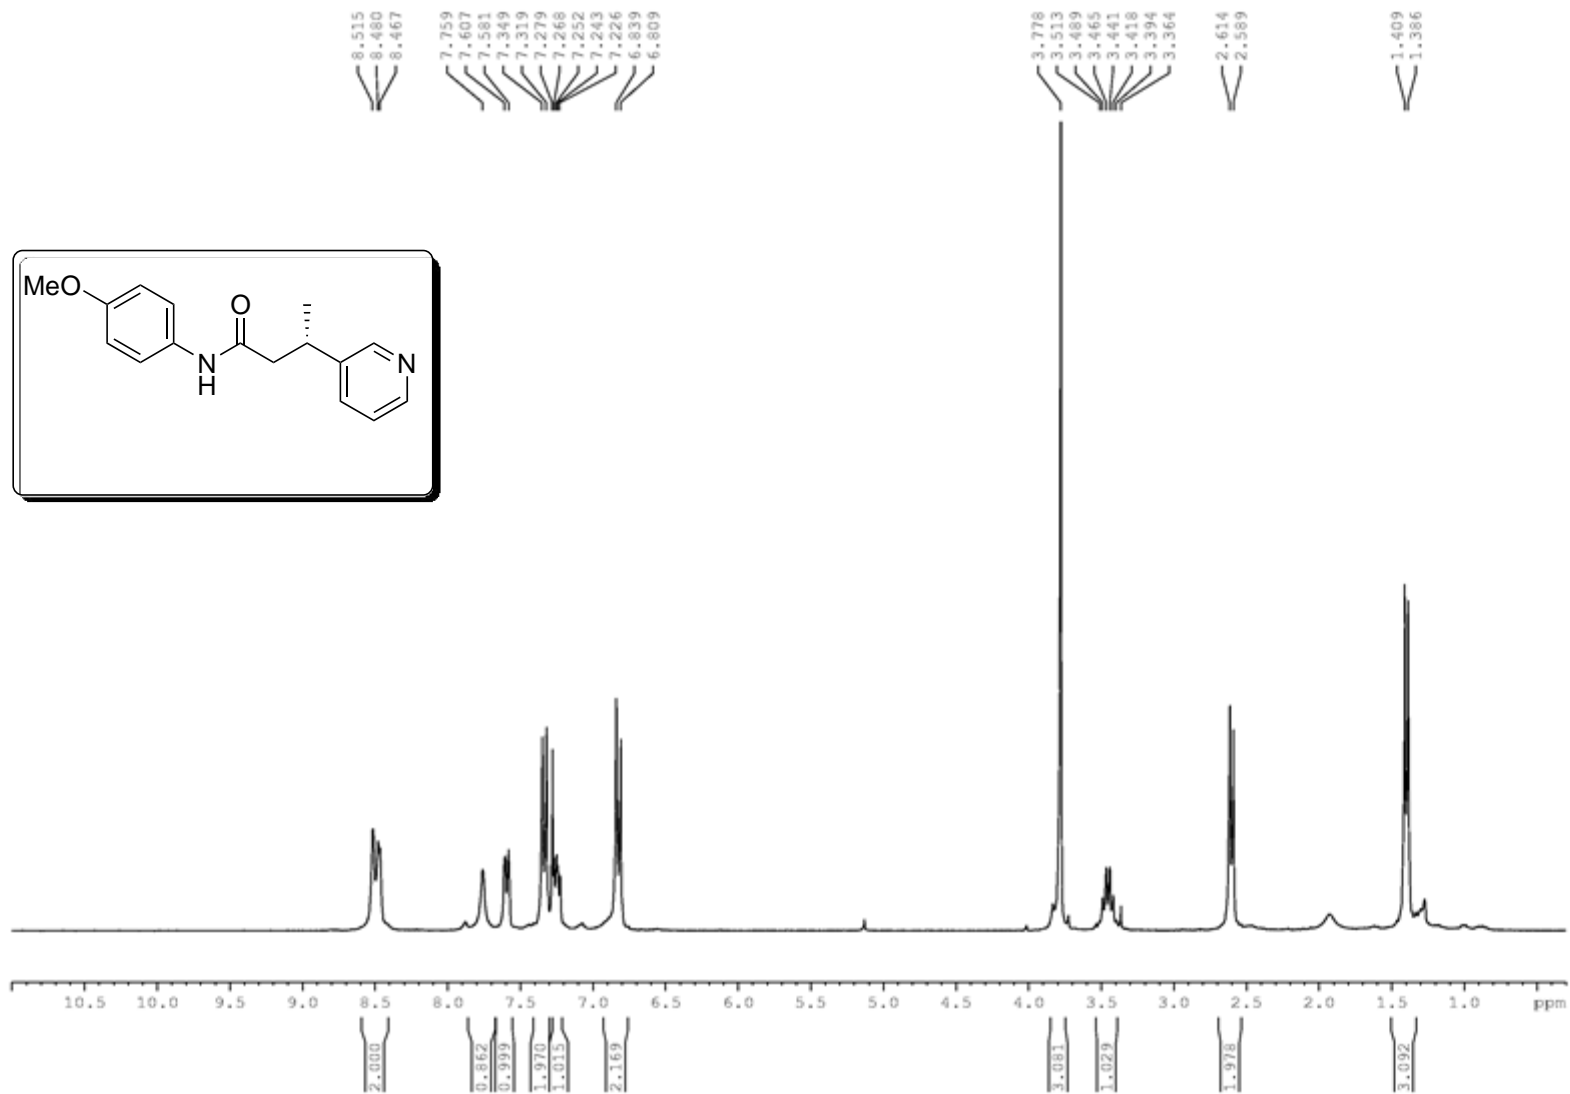

<sup>13</sup>C NMR (CDCl<sub>3</sub>, 75.4 MHz) spectrum of (S)-N-(4-Methoxyphenyl)-3-(pyridin-3-yl)butanamide (12a)

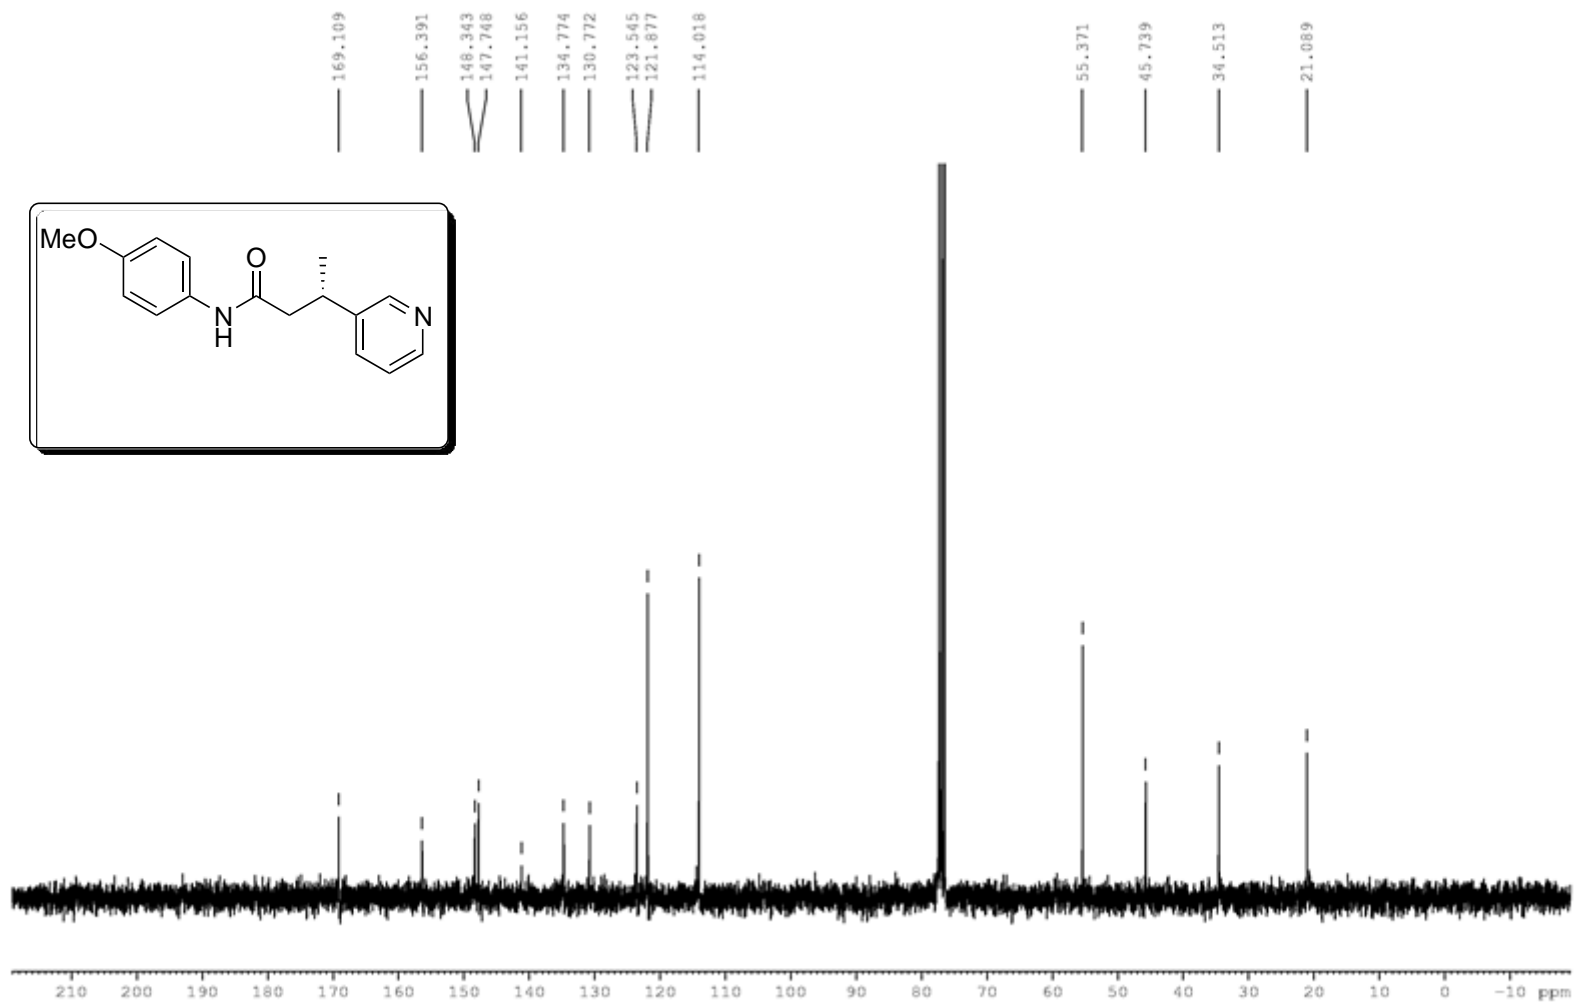

$^1\text{H}$  NMR ( $\text{CDCl}_3$ , 300 MHz) spectrum of (*S*)-*N*-(4-Methoxyphenyl)-3-(thiophen-3-yl)butanamide (12b)

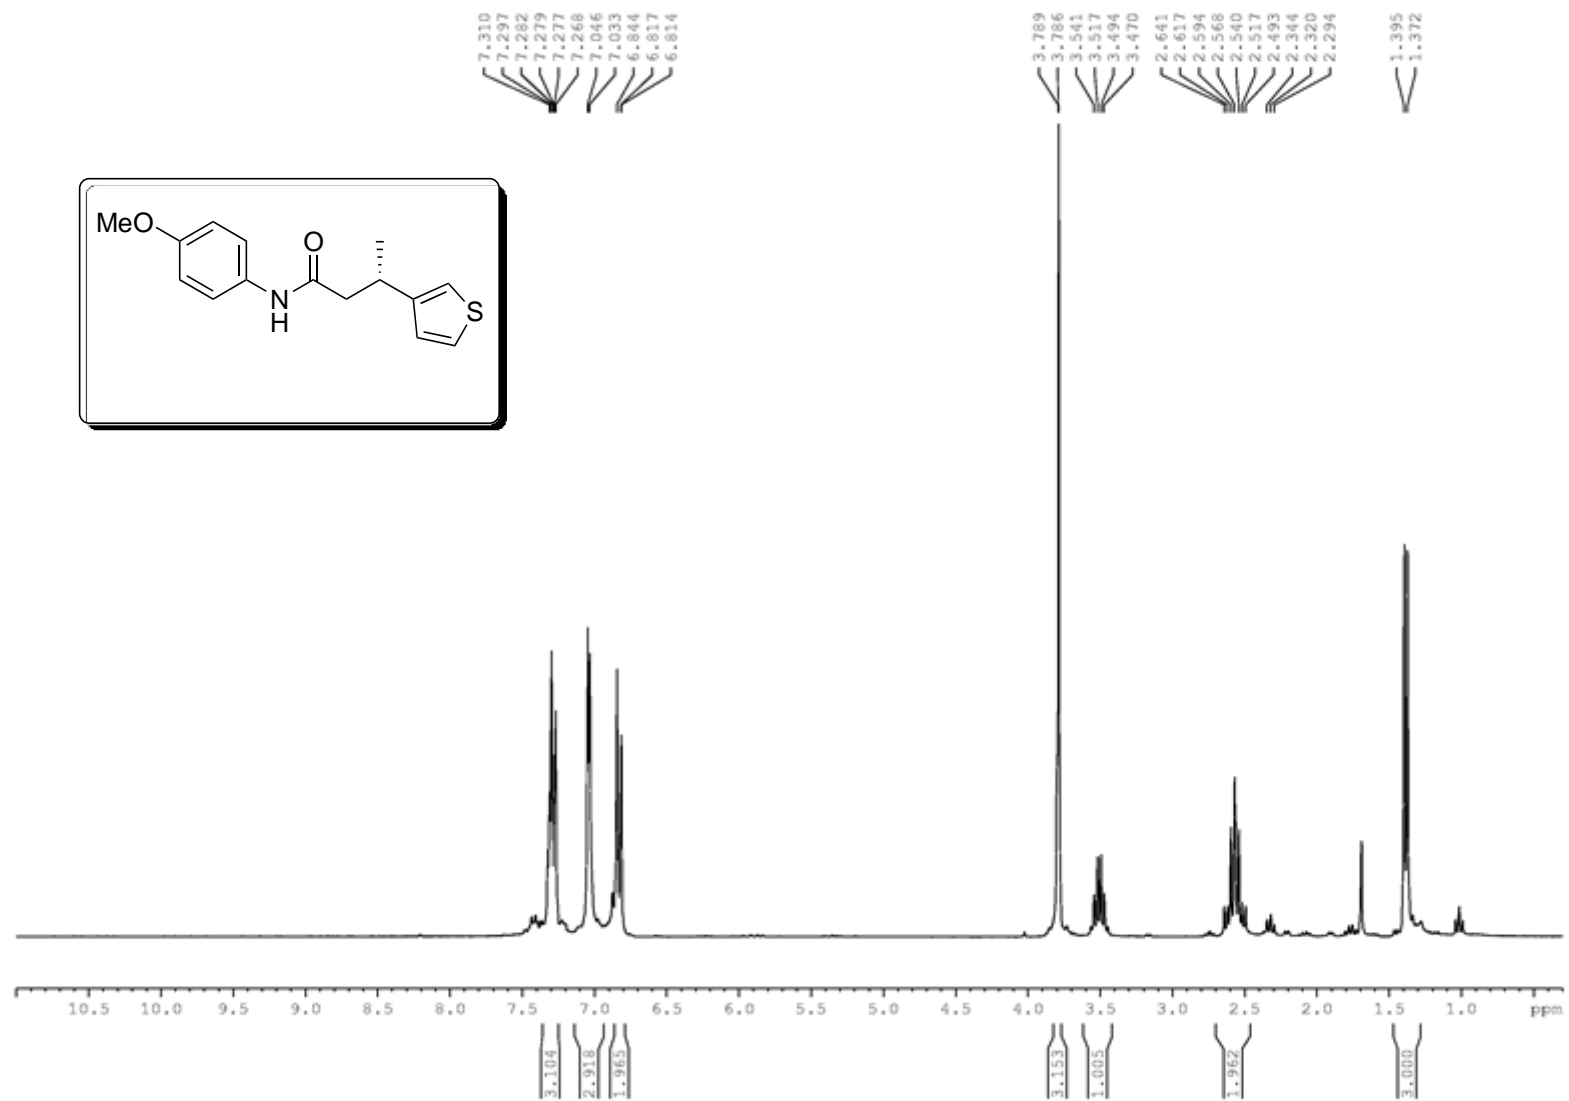

<sup>13</sup>C NMR (CDCl<sub>3</sub>, 75.4 MHz) spectrum of (S)-N-(4-Methoxyphenyl)-3-(thiophen-3-yl)butanamide (12b)

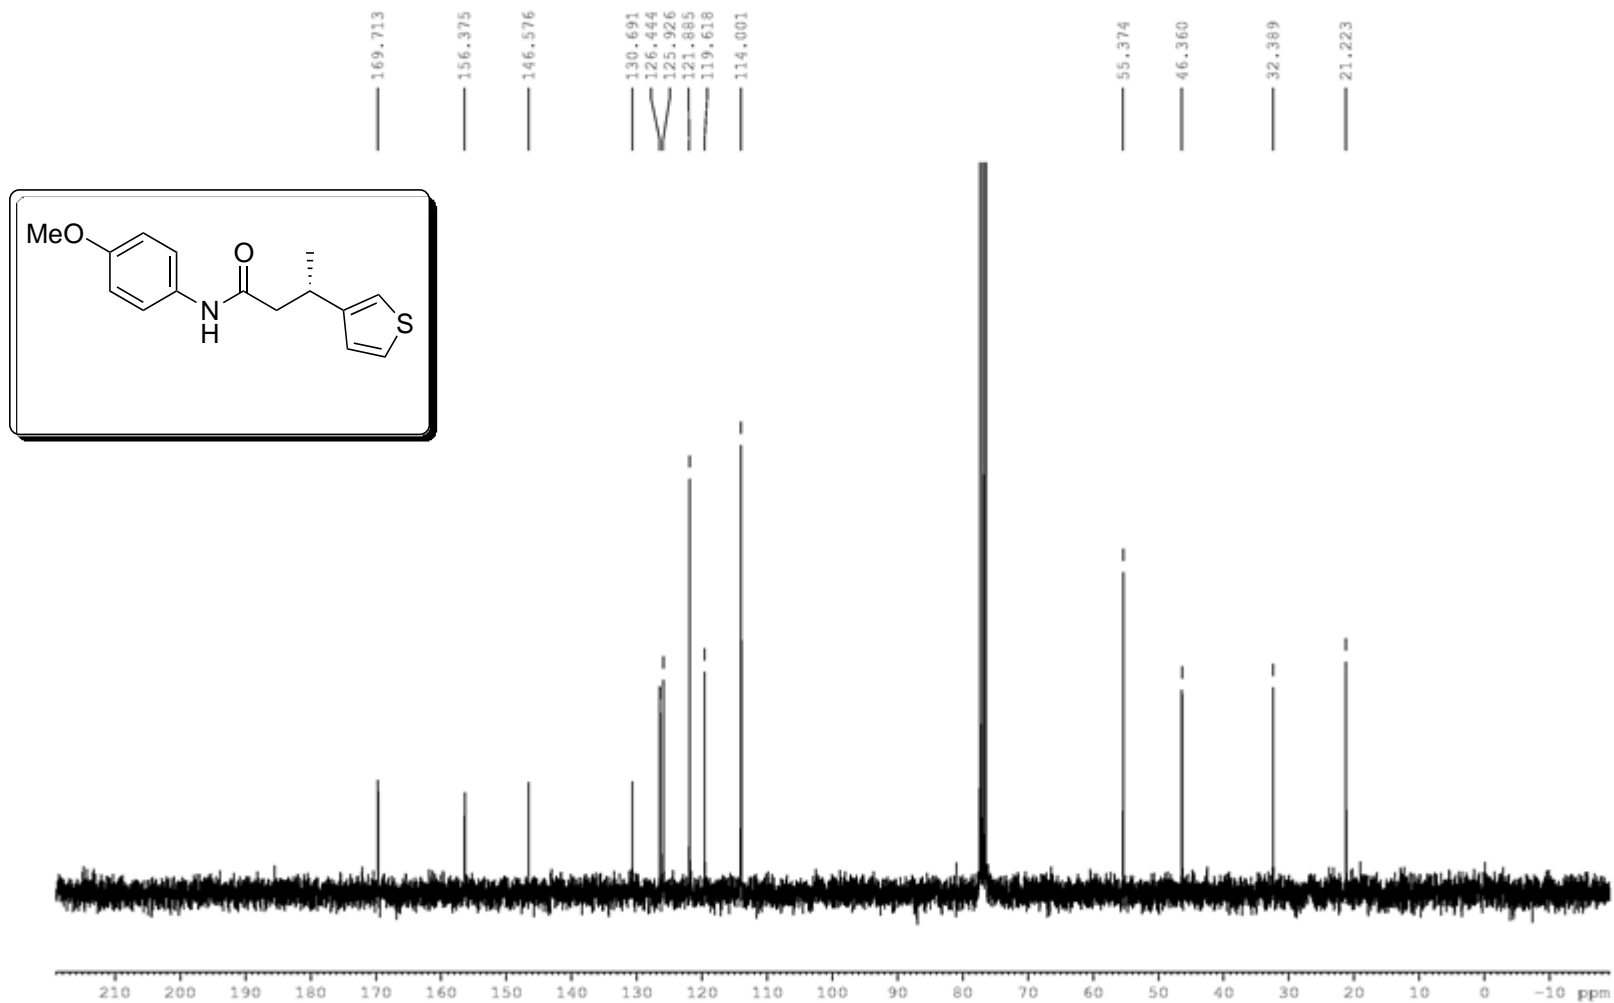

$^1\text{H}$  NMR ( $\text{CDCl}_3$ , 360 MHz) spectrum of (*S*)-*N*-(4-methoxyphenyl)-3-(thiophen-2-yl)butanamide (12c)

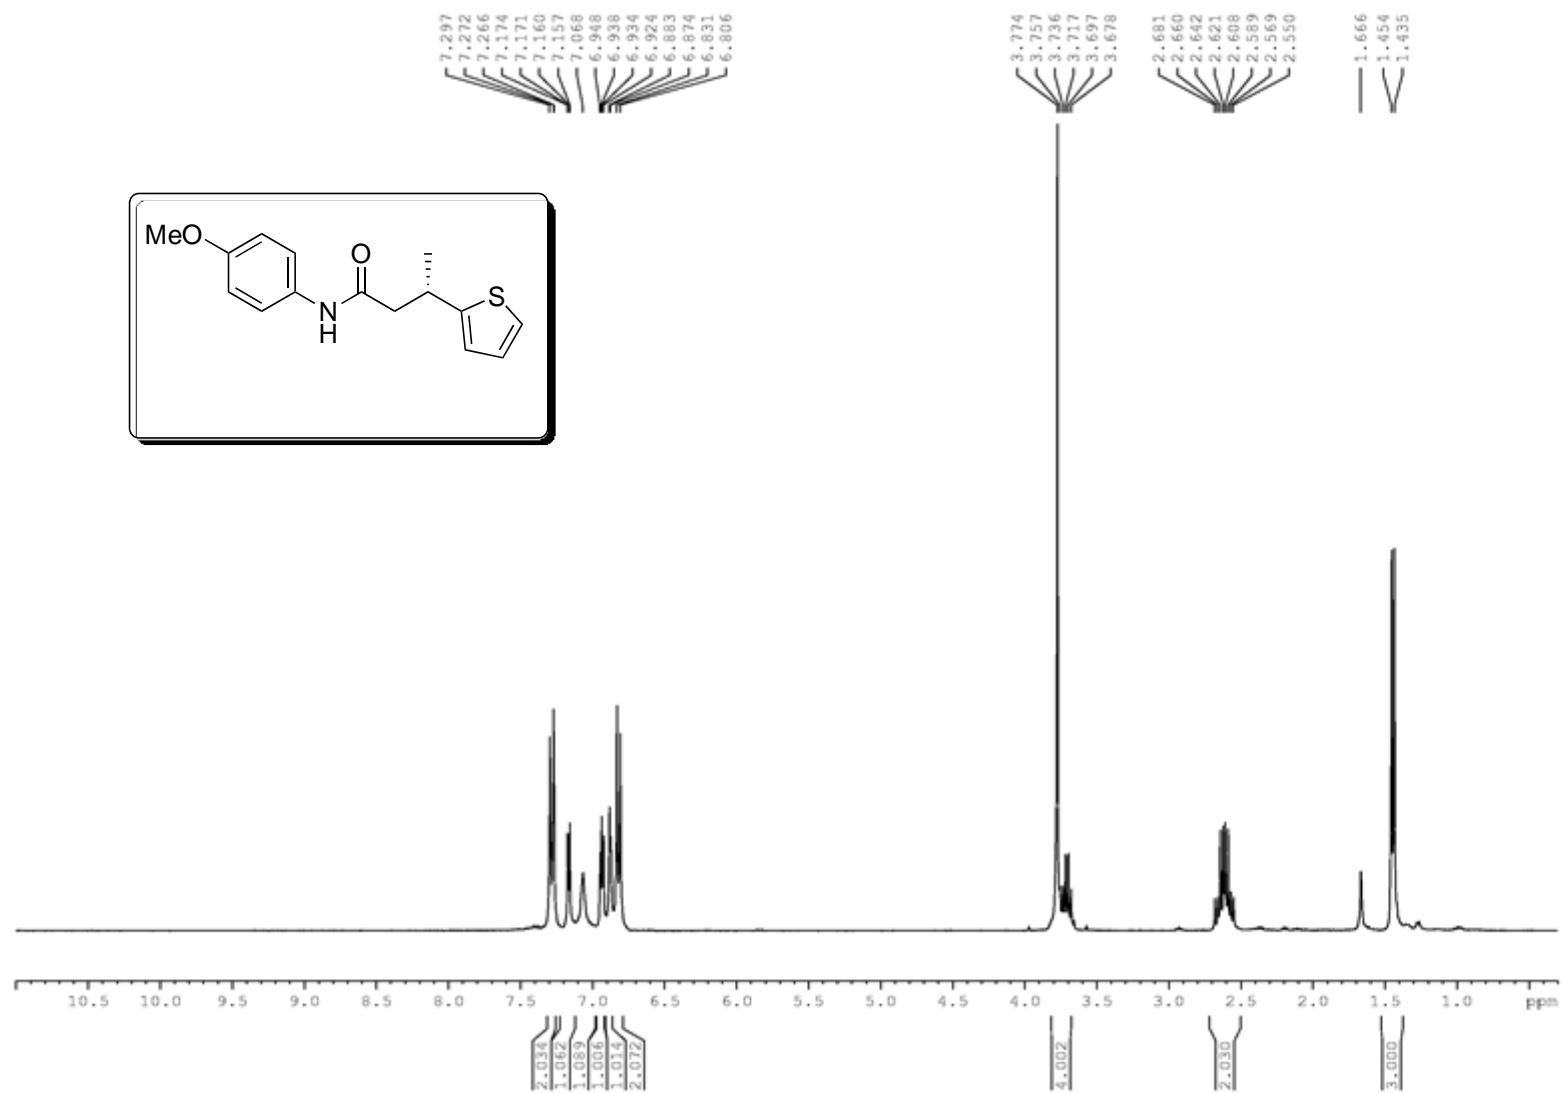



<sup>13</sup>C NMR (CDCl<sub>3</sub>, 90.5 MHz) spectrum of (S)-N-(4-methoxyphenyl)-3-(thiophen-2-yl)butanamide (12c)

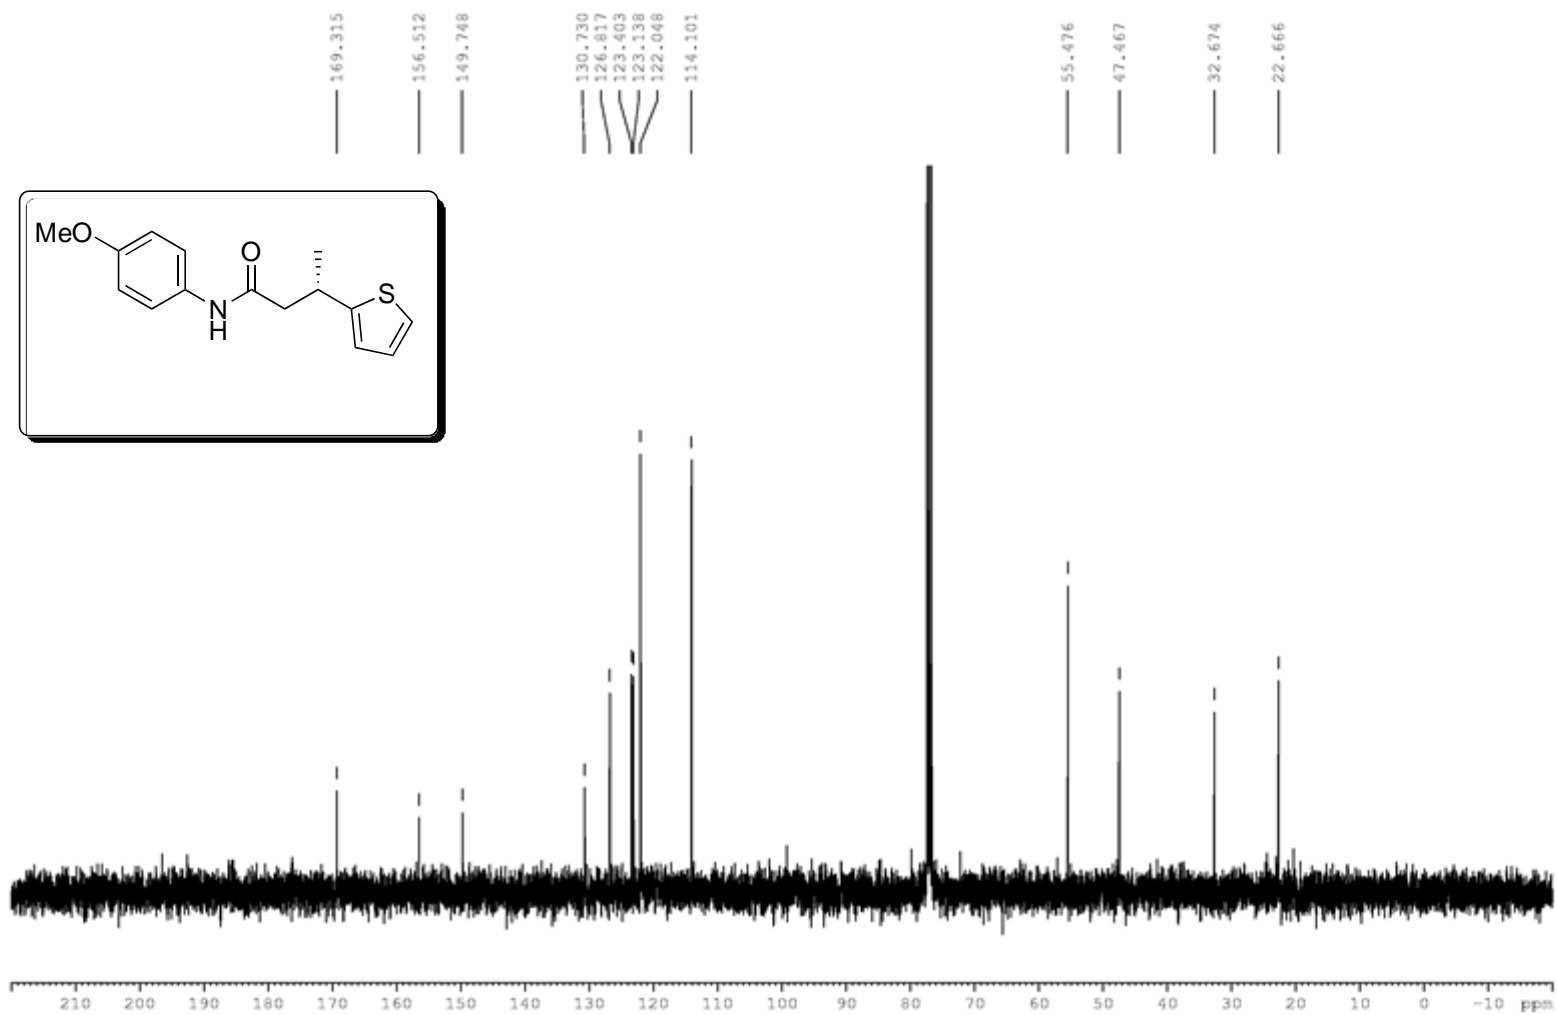

<sup>1</sup>H NMR (CDCl<sub>3</sub>, 500 MHz) spectrum of *N*-(4-methoxyphenyl)-3-(quinolin-6-yl)butanamide (12d)

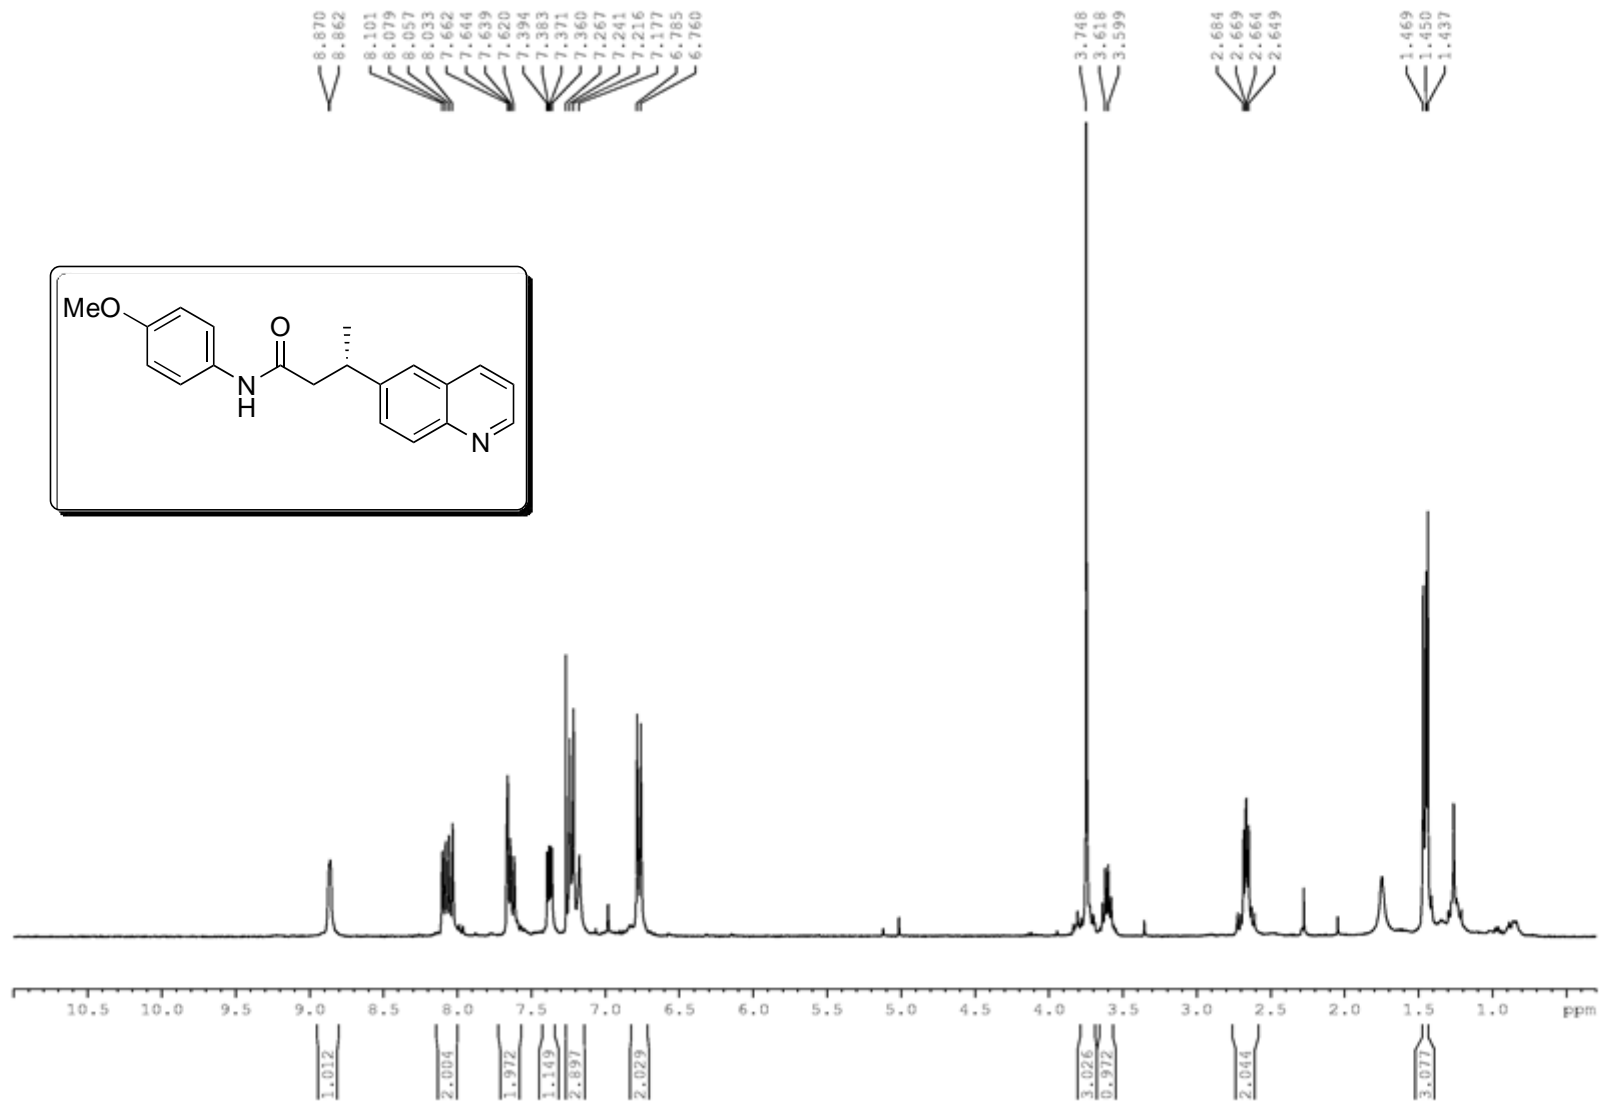

<sup>13</sup>C NMR (CDCl<sub>3</sub>, 500 MHz) spectrum of (S)-N-(4-methoxyphenyl)-3-(quinolin-6-yl)butanamide (12d)

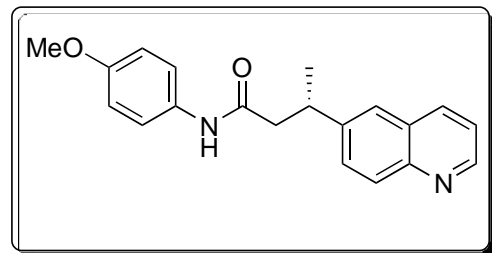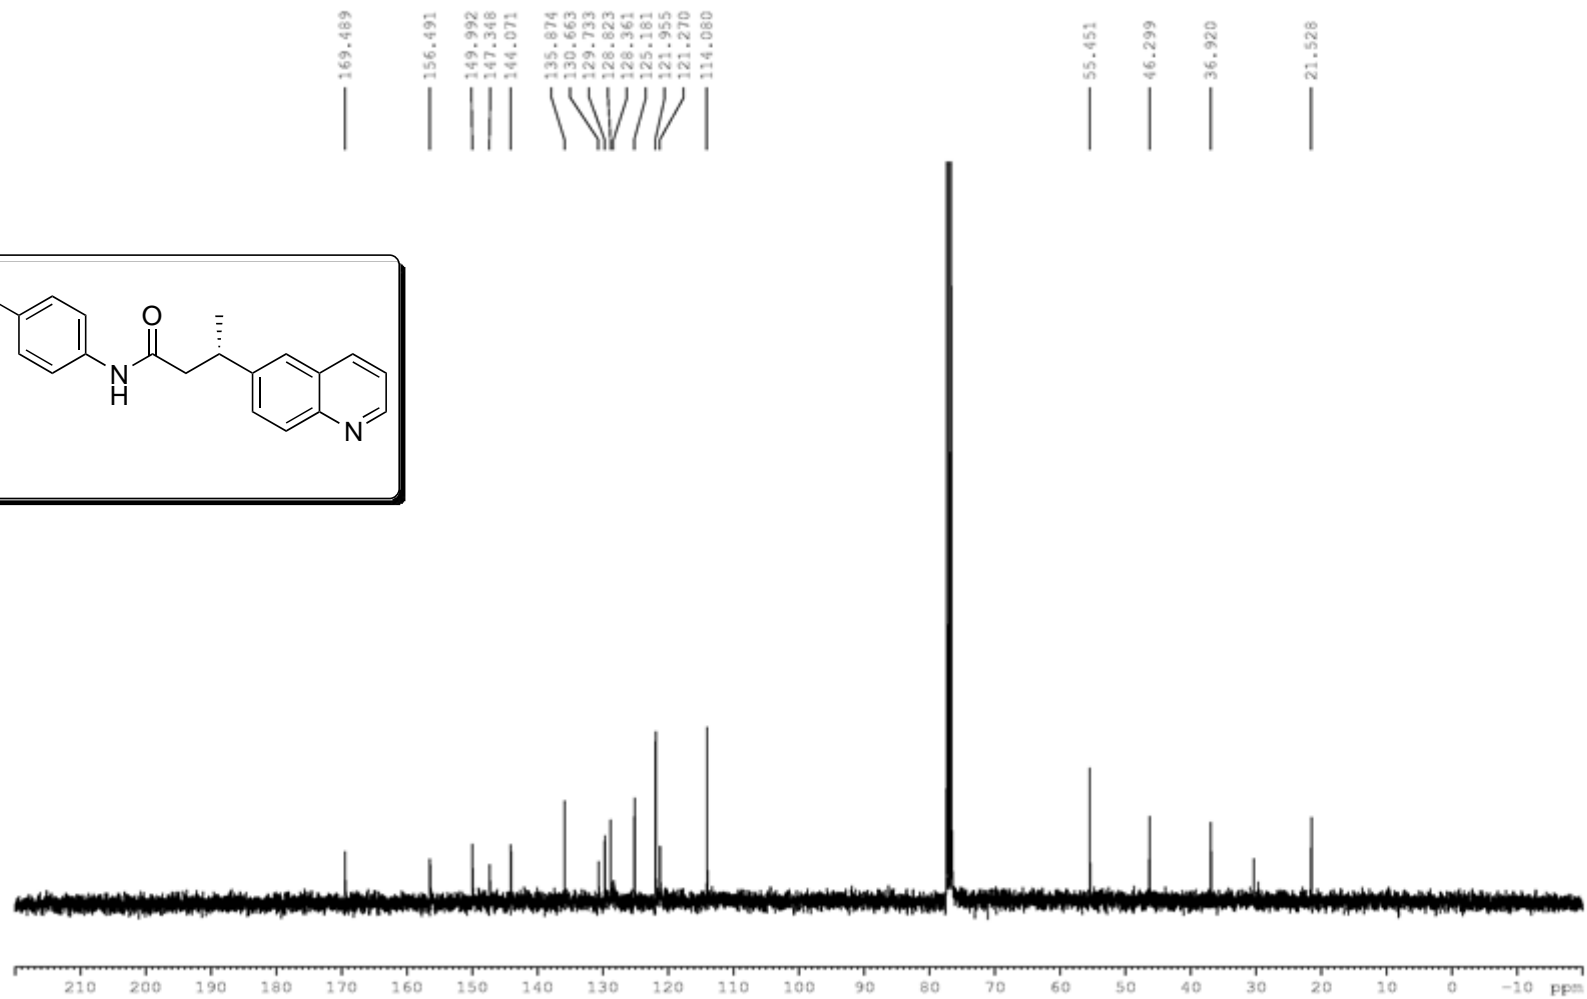

<sup>1</sup>H NMR (CDCl<sub>3</sub>, 500 MHz) spectrum of *tert*-Butyl-(*S*)-5-(4-((4-methoxyphenyl)amino)-4-oxobutan-2-yl)-1*H*-indole-1-carboxylate (12e)

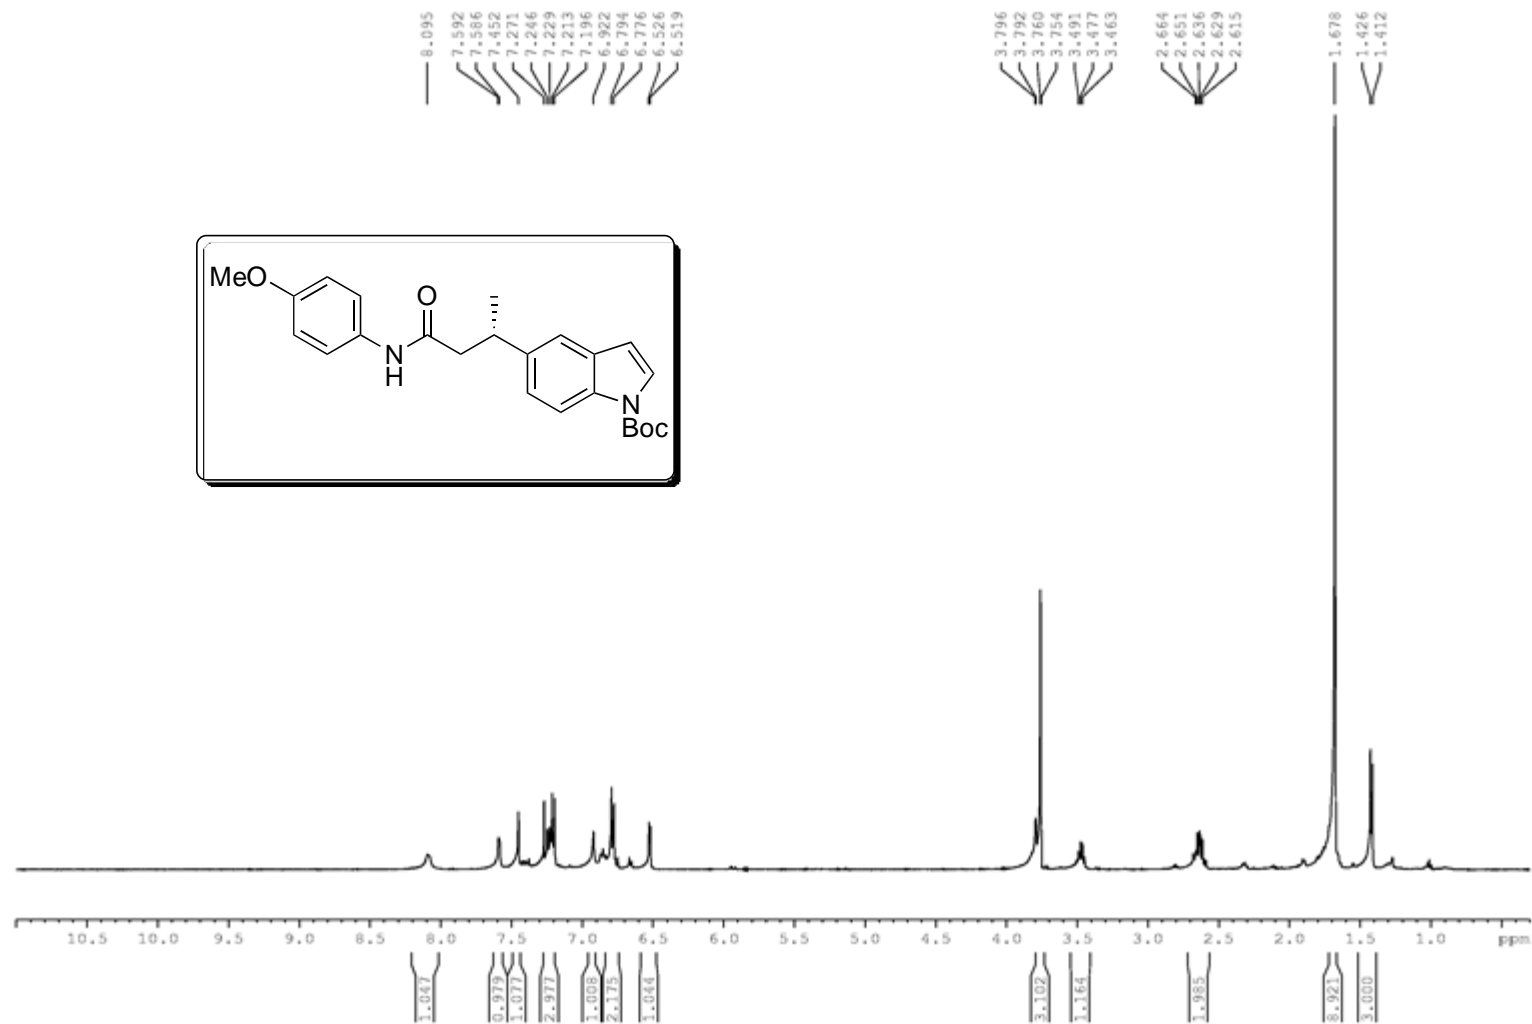

<sup>13</sup>C NMR (CDCl<sub>3</sub>, 90.5 MHz) spectrum of *tert*-Butyl-(*S*)-5-(4-((4-methoxyphenyl)amino)-4-oxobutan-2-yl)-1*H*-indole-1-carboxylate

(12e)

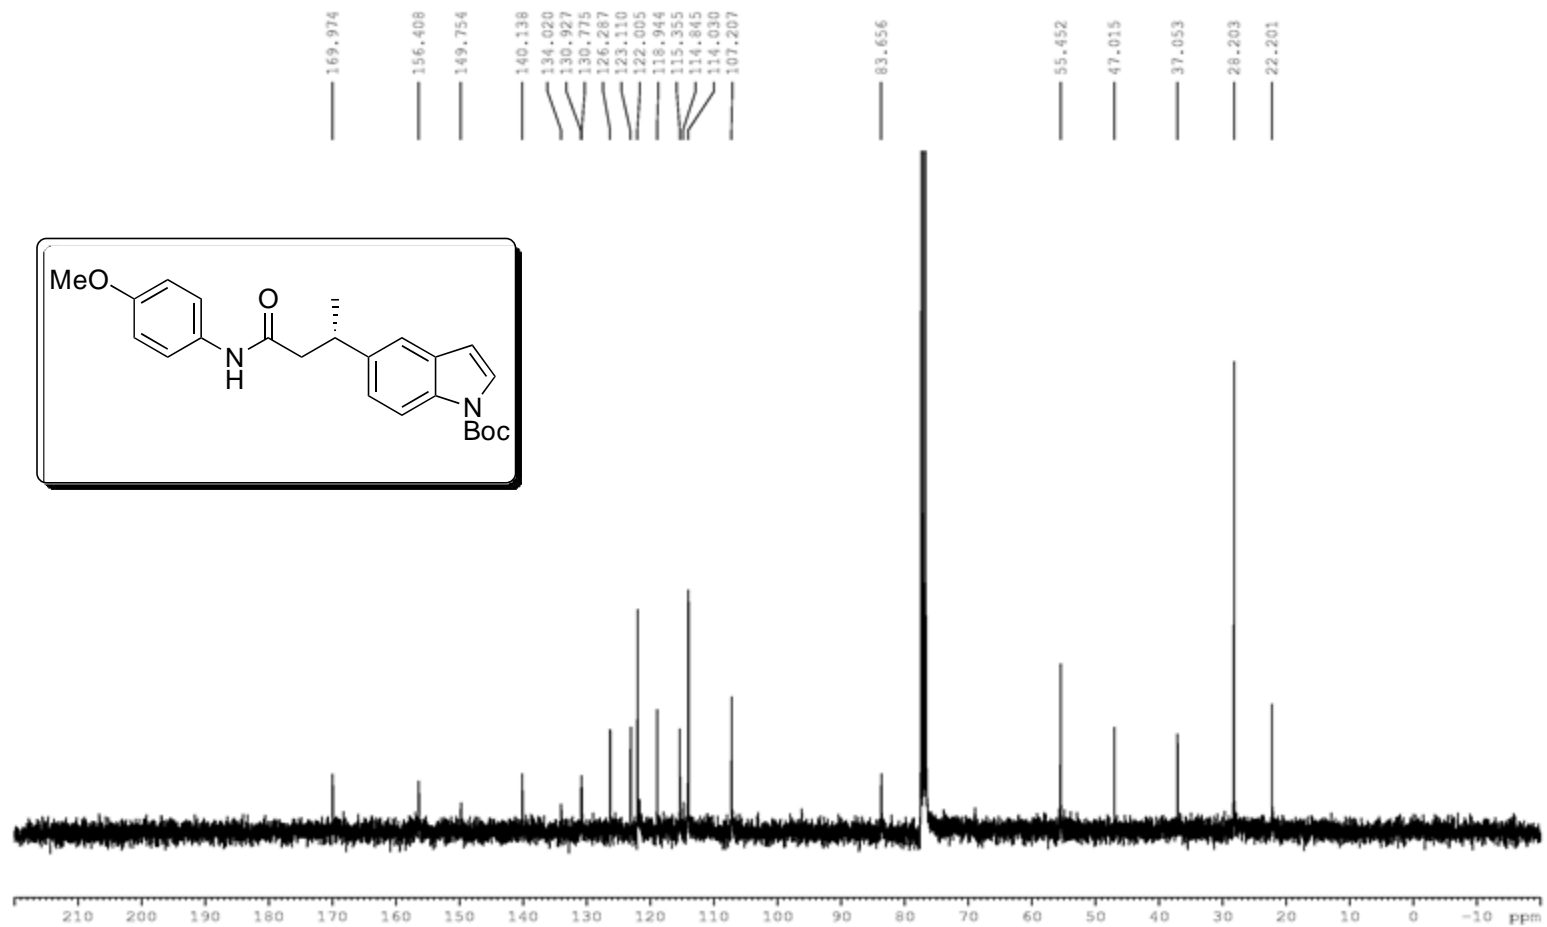

$^1\text{H}$  NMR ( $\text{CDCl}_3$ , 360 MHz) spectrum of (*S*)-*N*-(4-Methoxyphenyl)-3-phenylbutanamide (8)

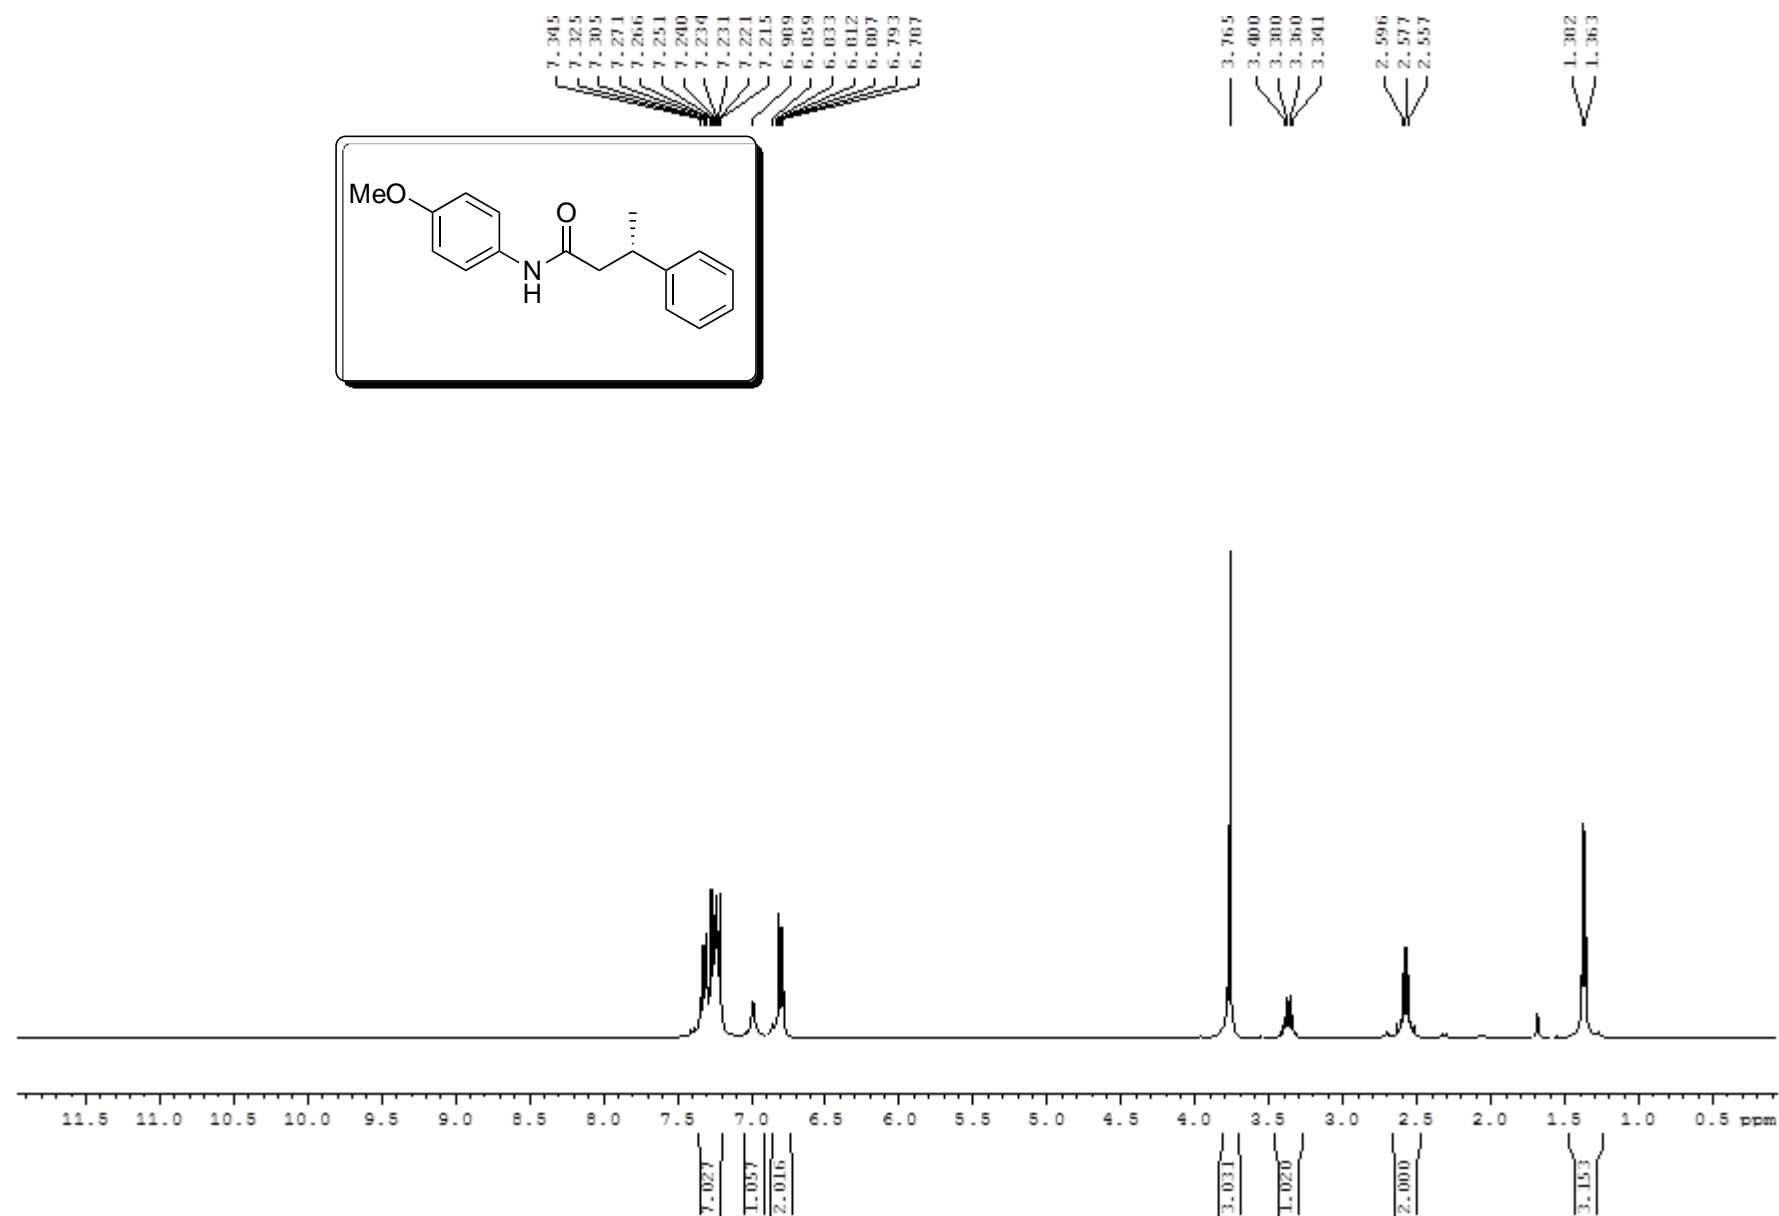

<sup>13</sup>C NMR (CDCl<sub>3</sub>, 90.5 MHz) spectrum of (S)-N-(4-Methoxyphenyl)-3-phenylbutanamide (8)

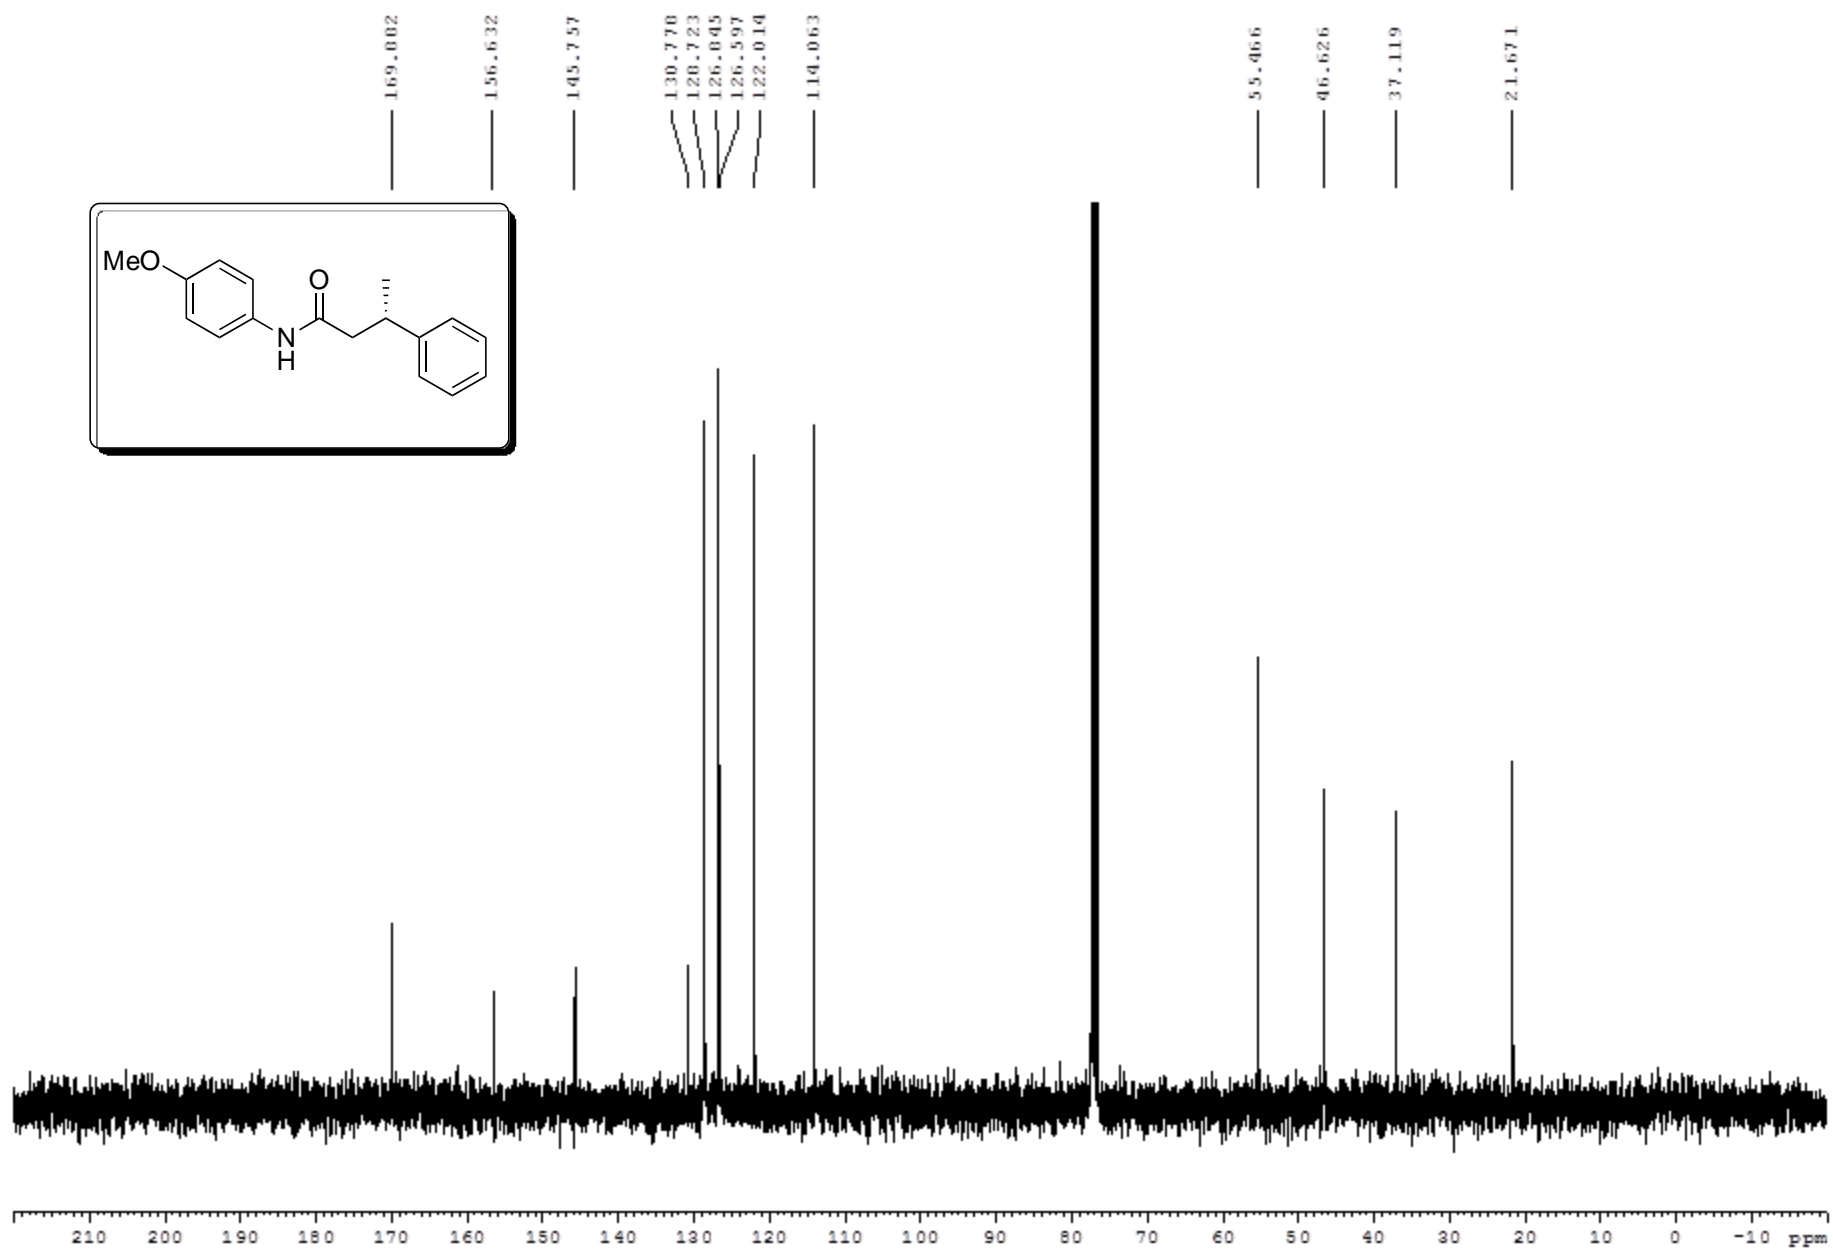

<sup>1</sup>H NMR (CDCl<sub>3</sub>, 300 MHz) spectrum of (S)-3-(4-Fluorophenyl)-N-(4-methoxyphenyl)butanamide (13a)

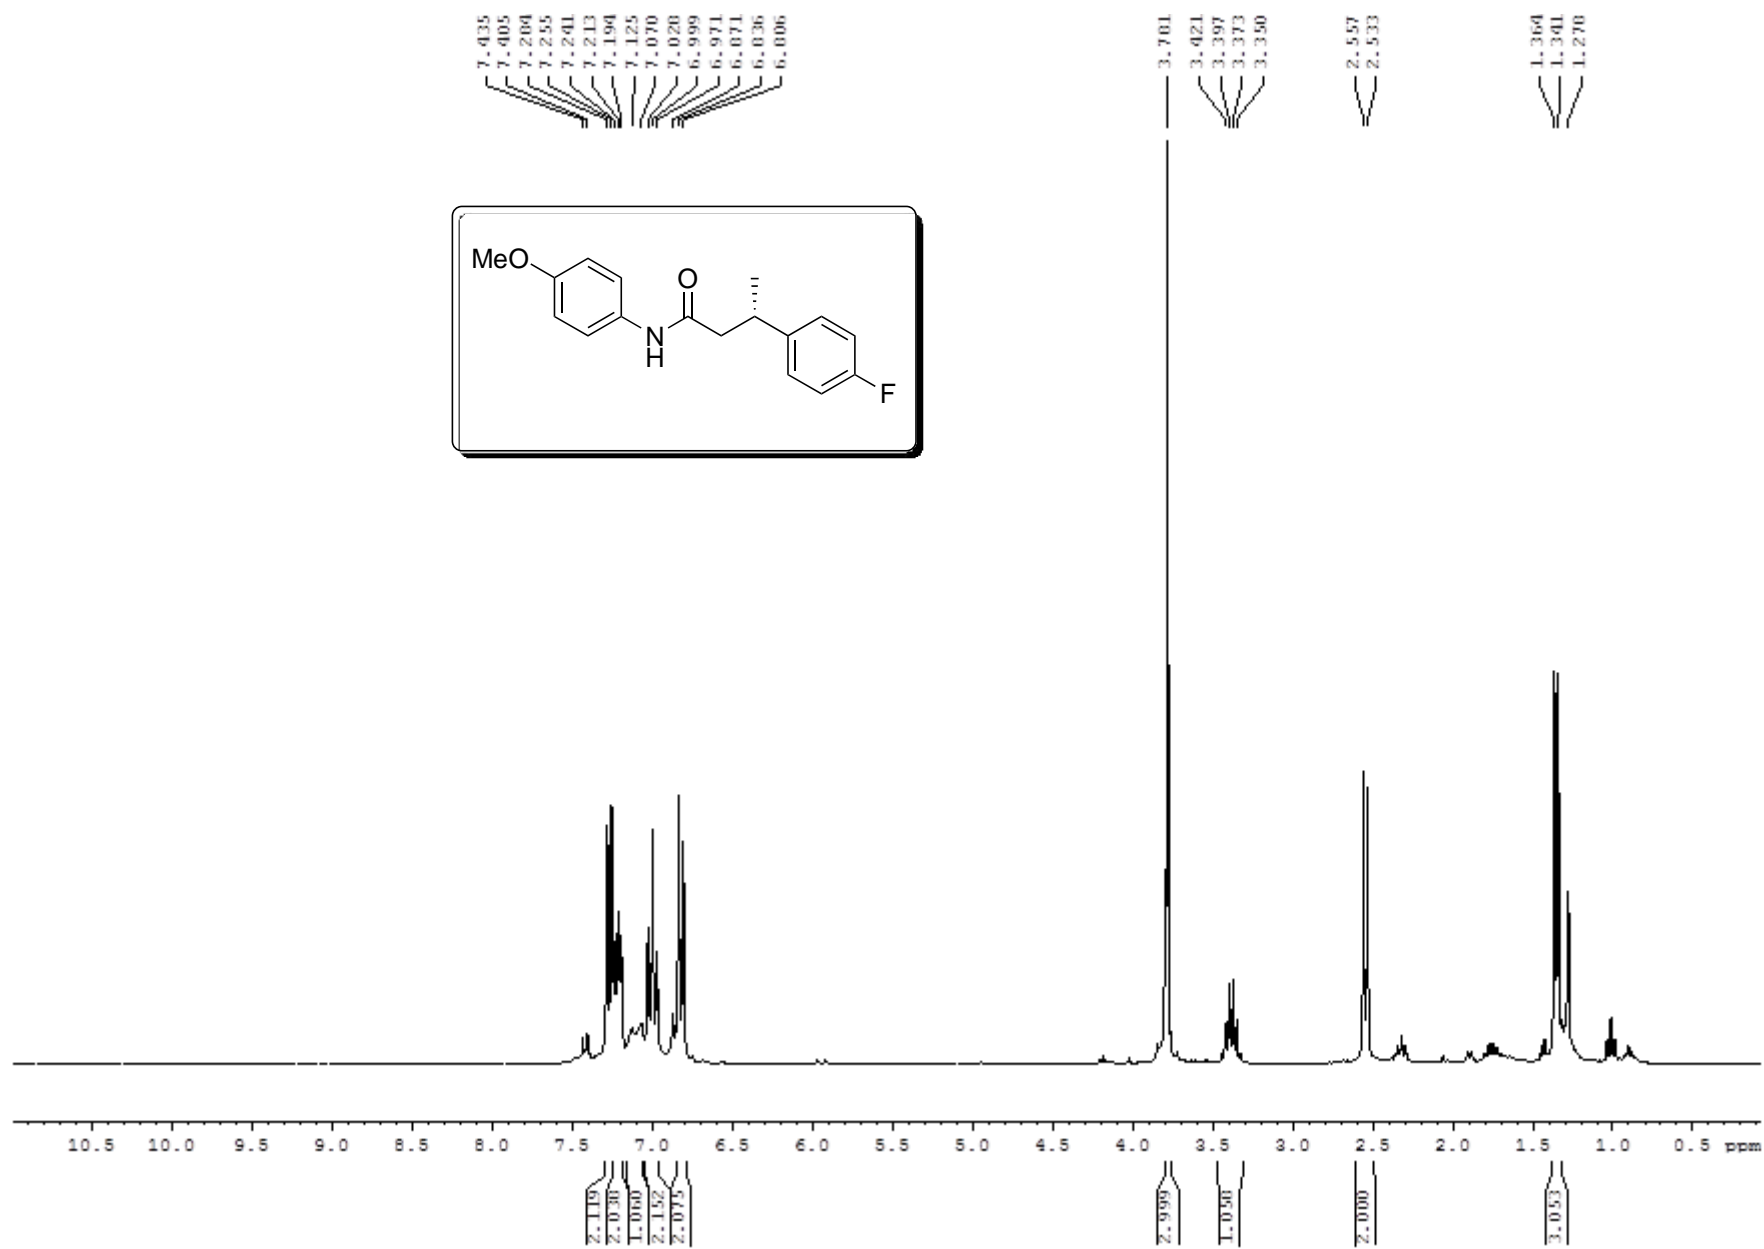



<sup>13</sup>C NMR (CDCl<sub>3</sub>, 75.4 MHz) spectrum of (S)-3-(4-Fluorophenyl)-N-(4-methoxyphenyl)butanamide (13a)

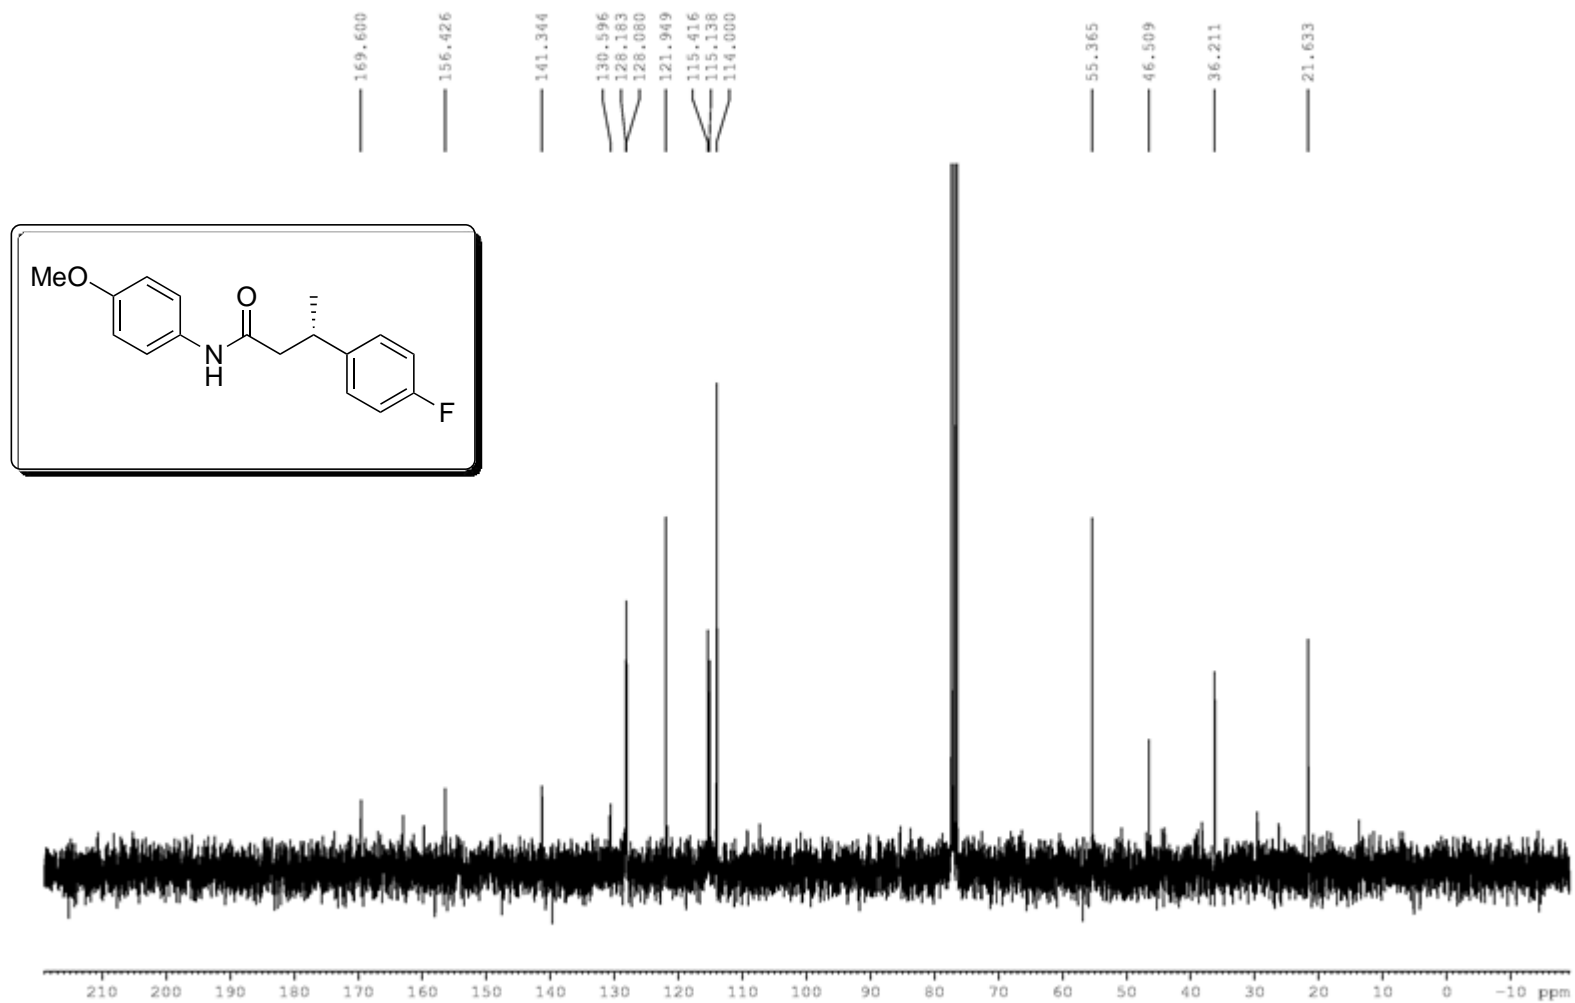

<sup>19</sup>F NMR (CDCl<sub>3</sub>, 282.4 MHz) spectrum of (*S*)-3-(4-Fluorophenyl)-*N*-(4-methoxyphenyl)butanamide (13a)

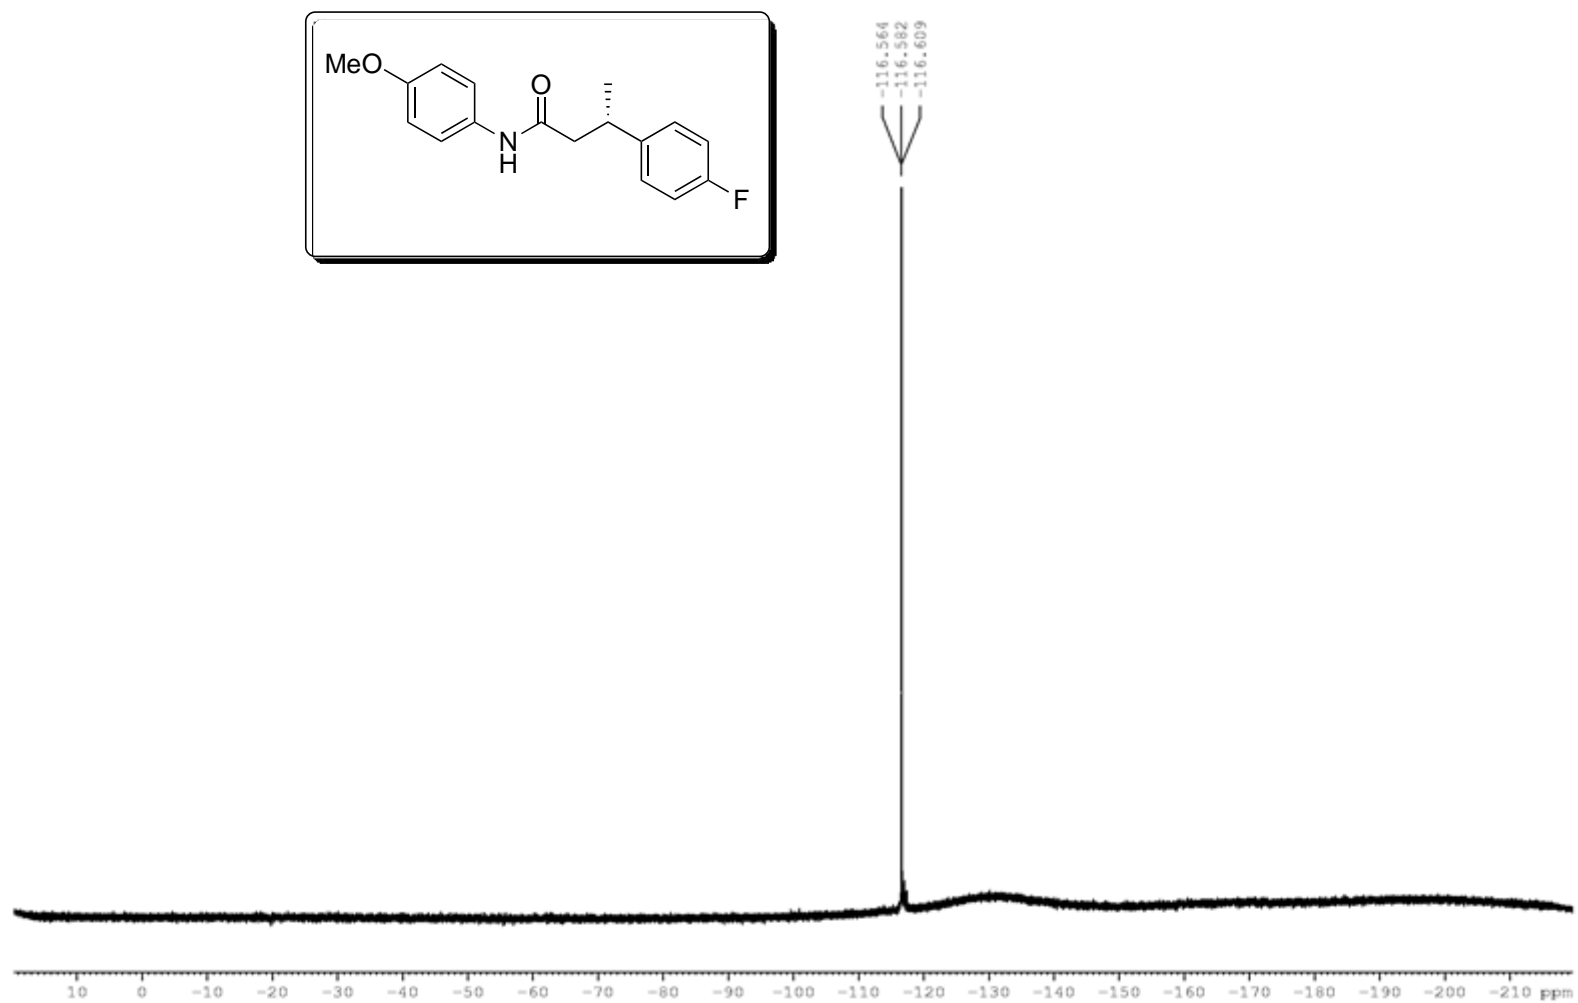

<sup>1</sup>H NMR (CDCl<sub>3</sub>, 500 MHz) spectrum of (S)-3-(4-Fluorophenyl)-N-phenylbutanamide (13b)

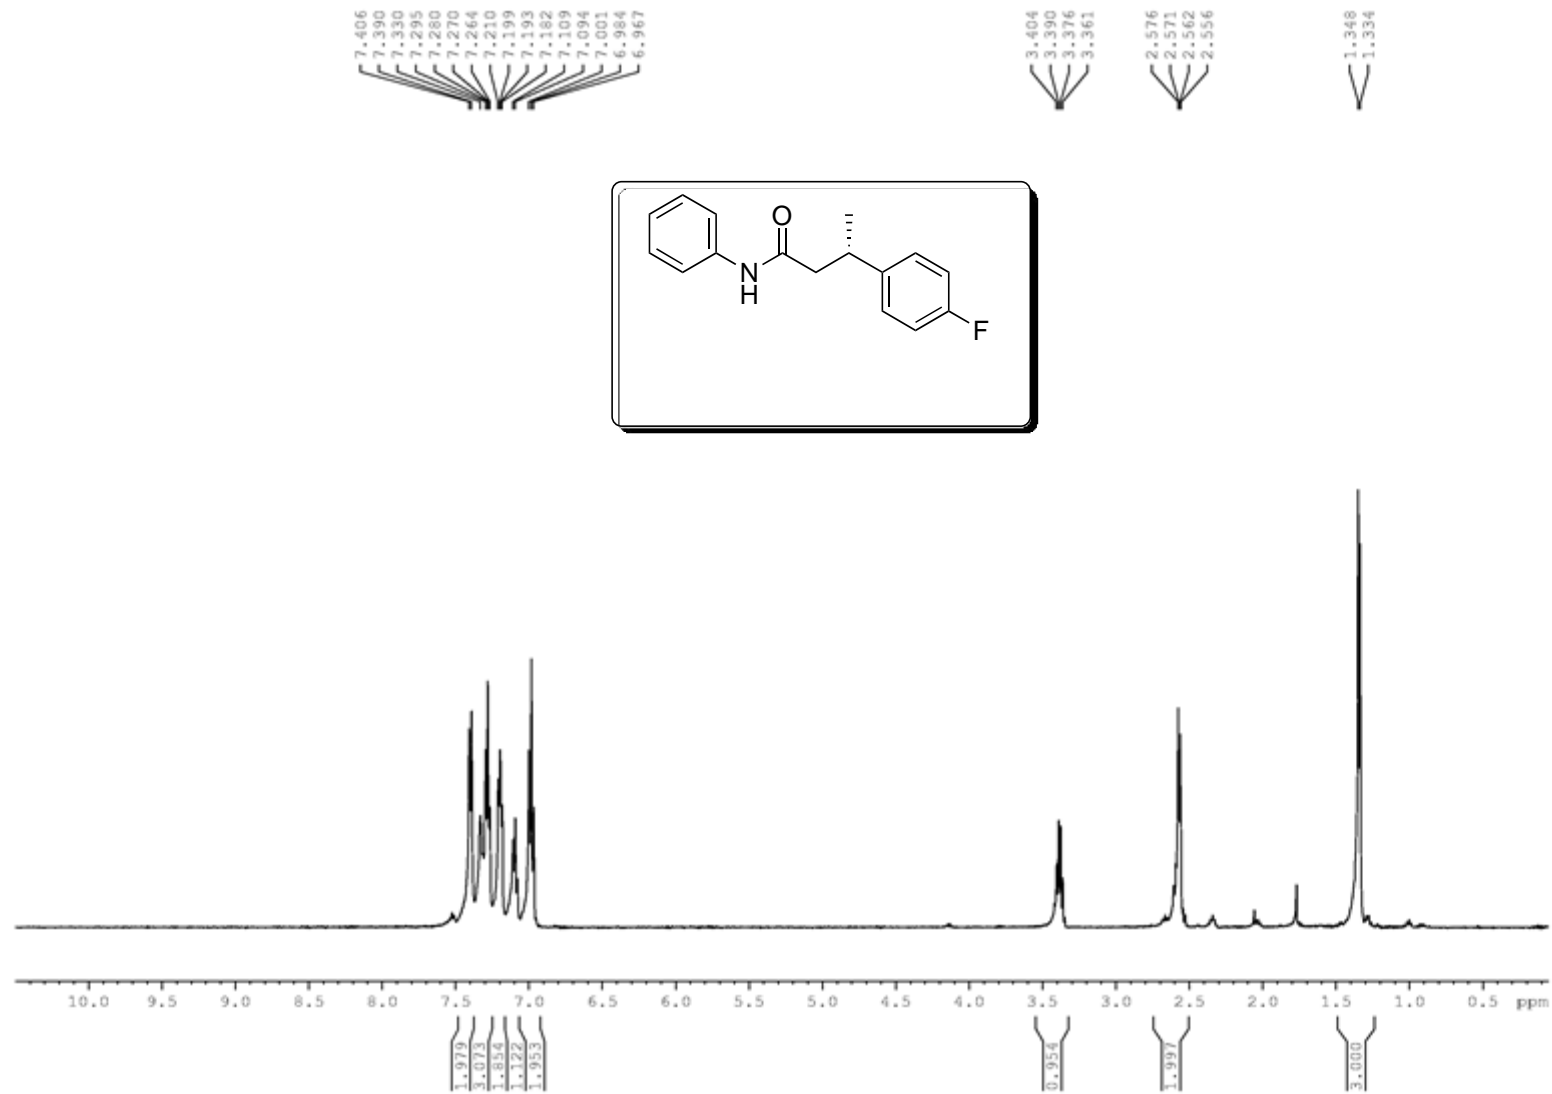

<sup>13</sup>C NMR (CDCl<sub>3</sub>, 125.8 MHz) spectrum of (S)-3-(4-Fluorophenyl)-N-phenylbutanamide (13b)

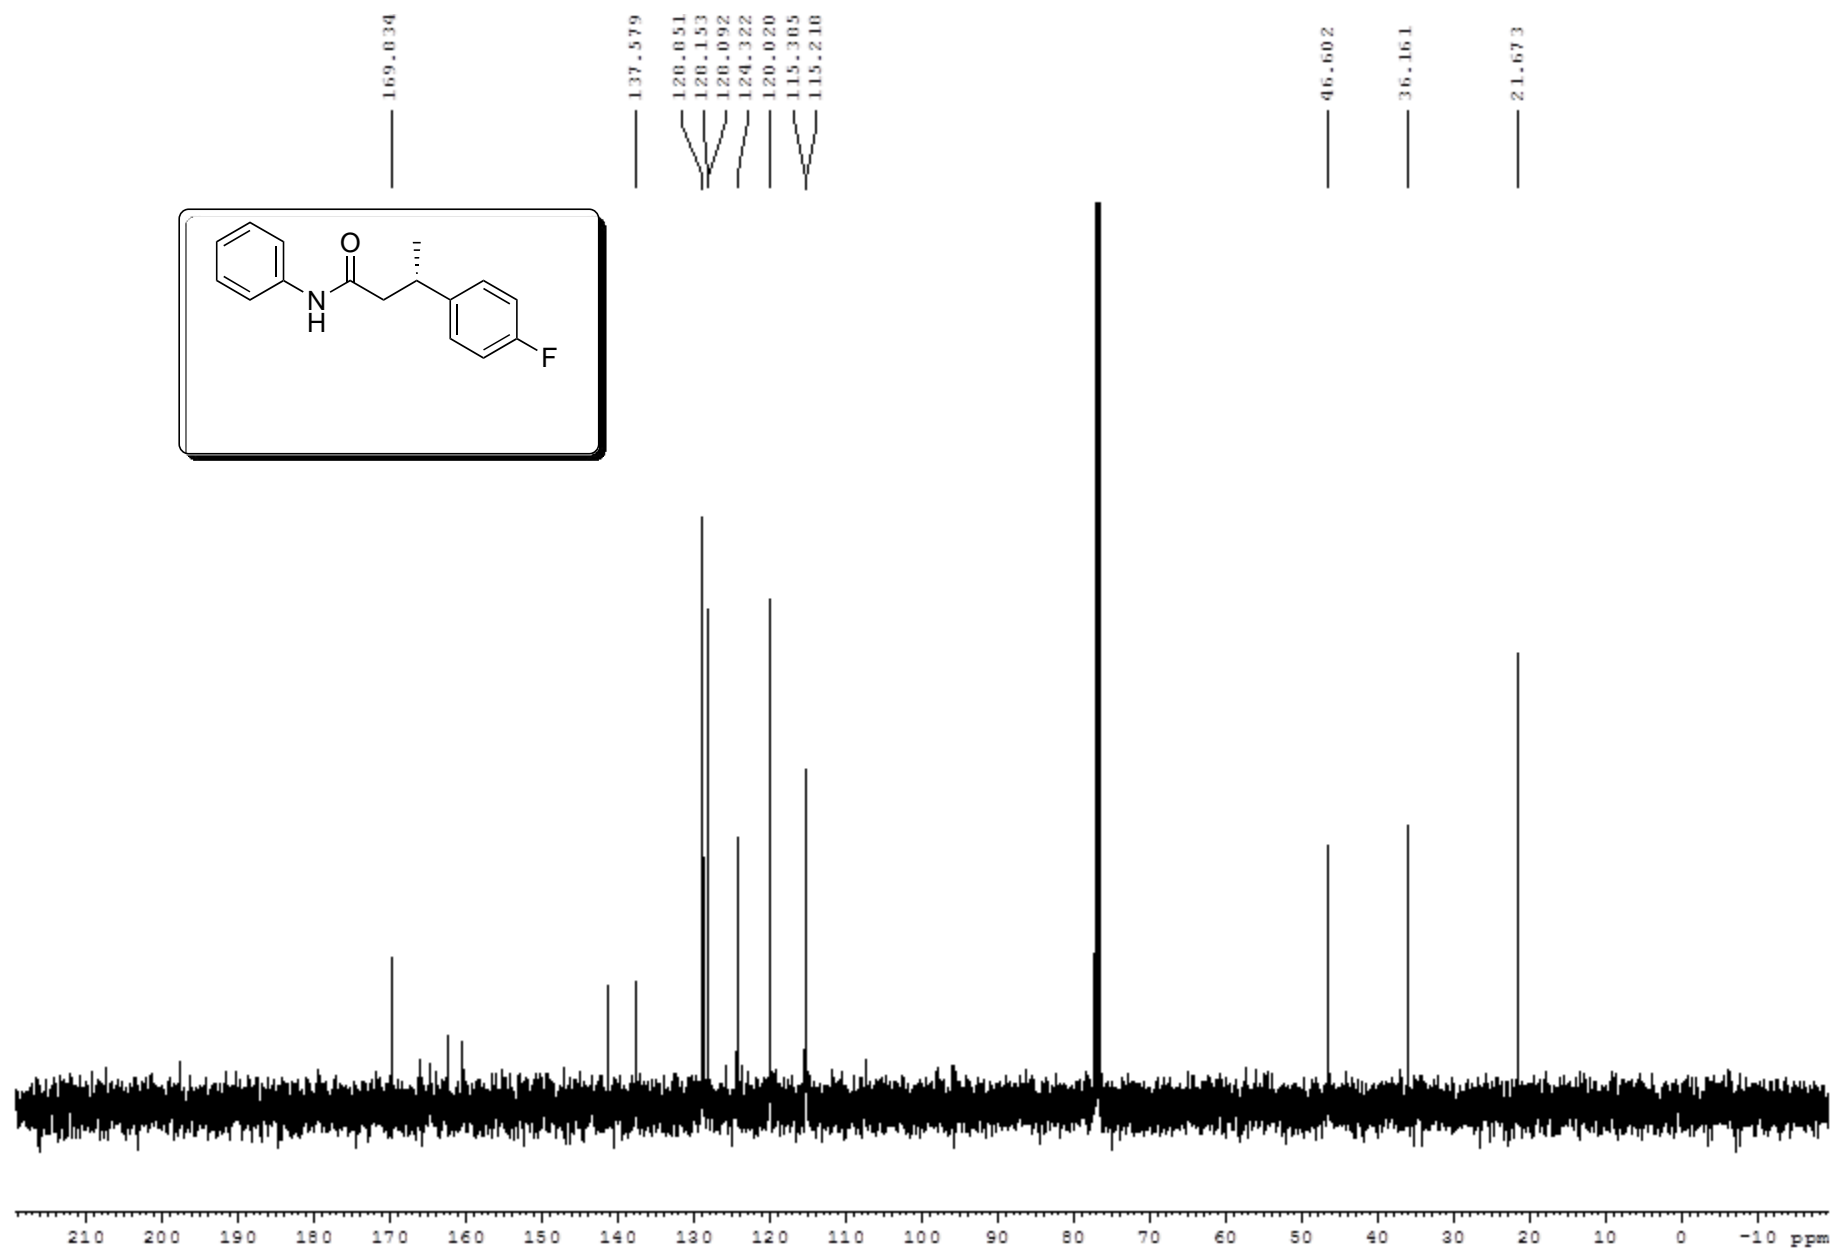

**<sup>19</sup>F NMR (CDCl<sub>3</sub>, 470.8 MHz) spectrum of (S)-3-(4-Fluorophenyl)-N-phenylbutanamide (13b)**

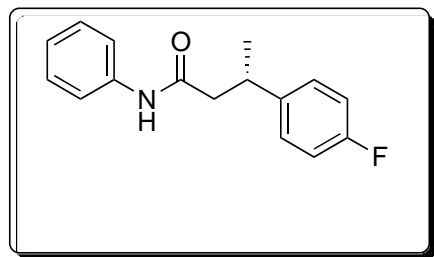

— 116.500

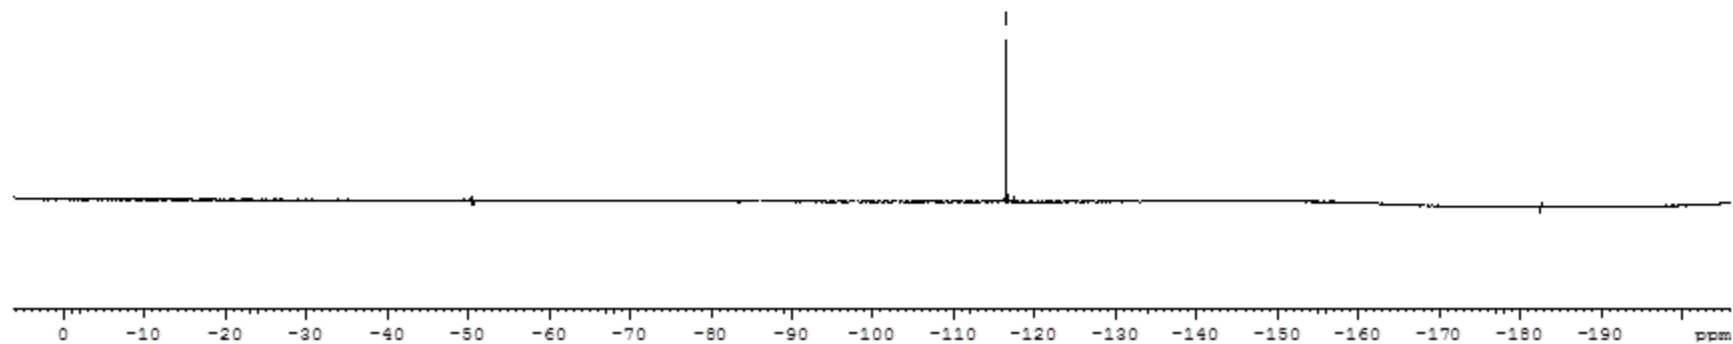



<sup>13</sup>C NMR (CDCl<sub>3</sub>, 90.5 MHz) spectrum of (S)-N-Ethyl-3-(4-fluorophenyl)-N-(o-tolyl)butanamide (13c)

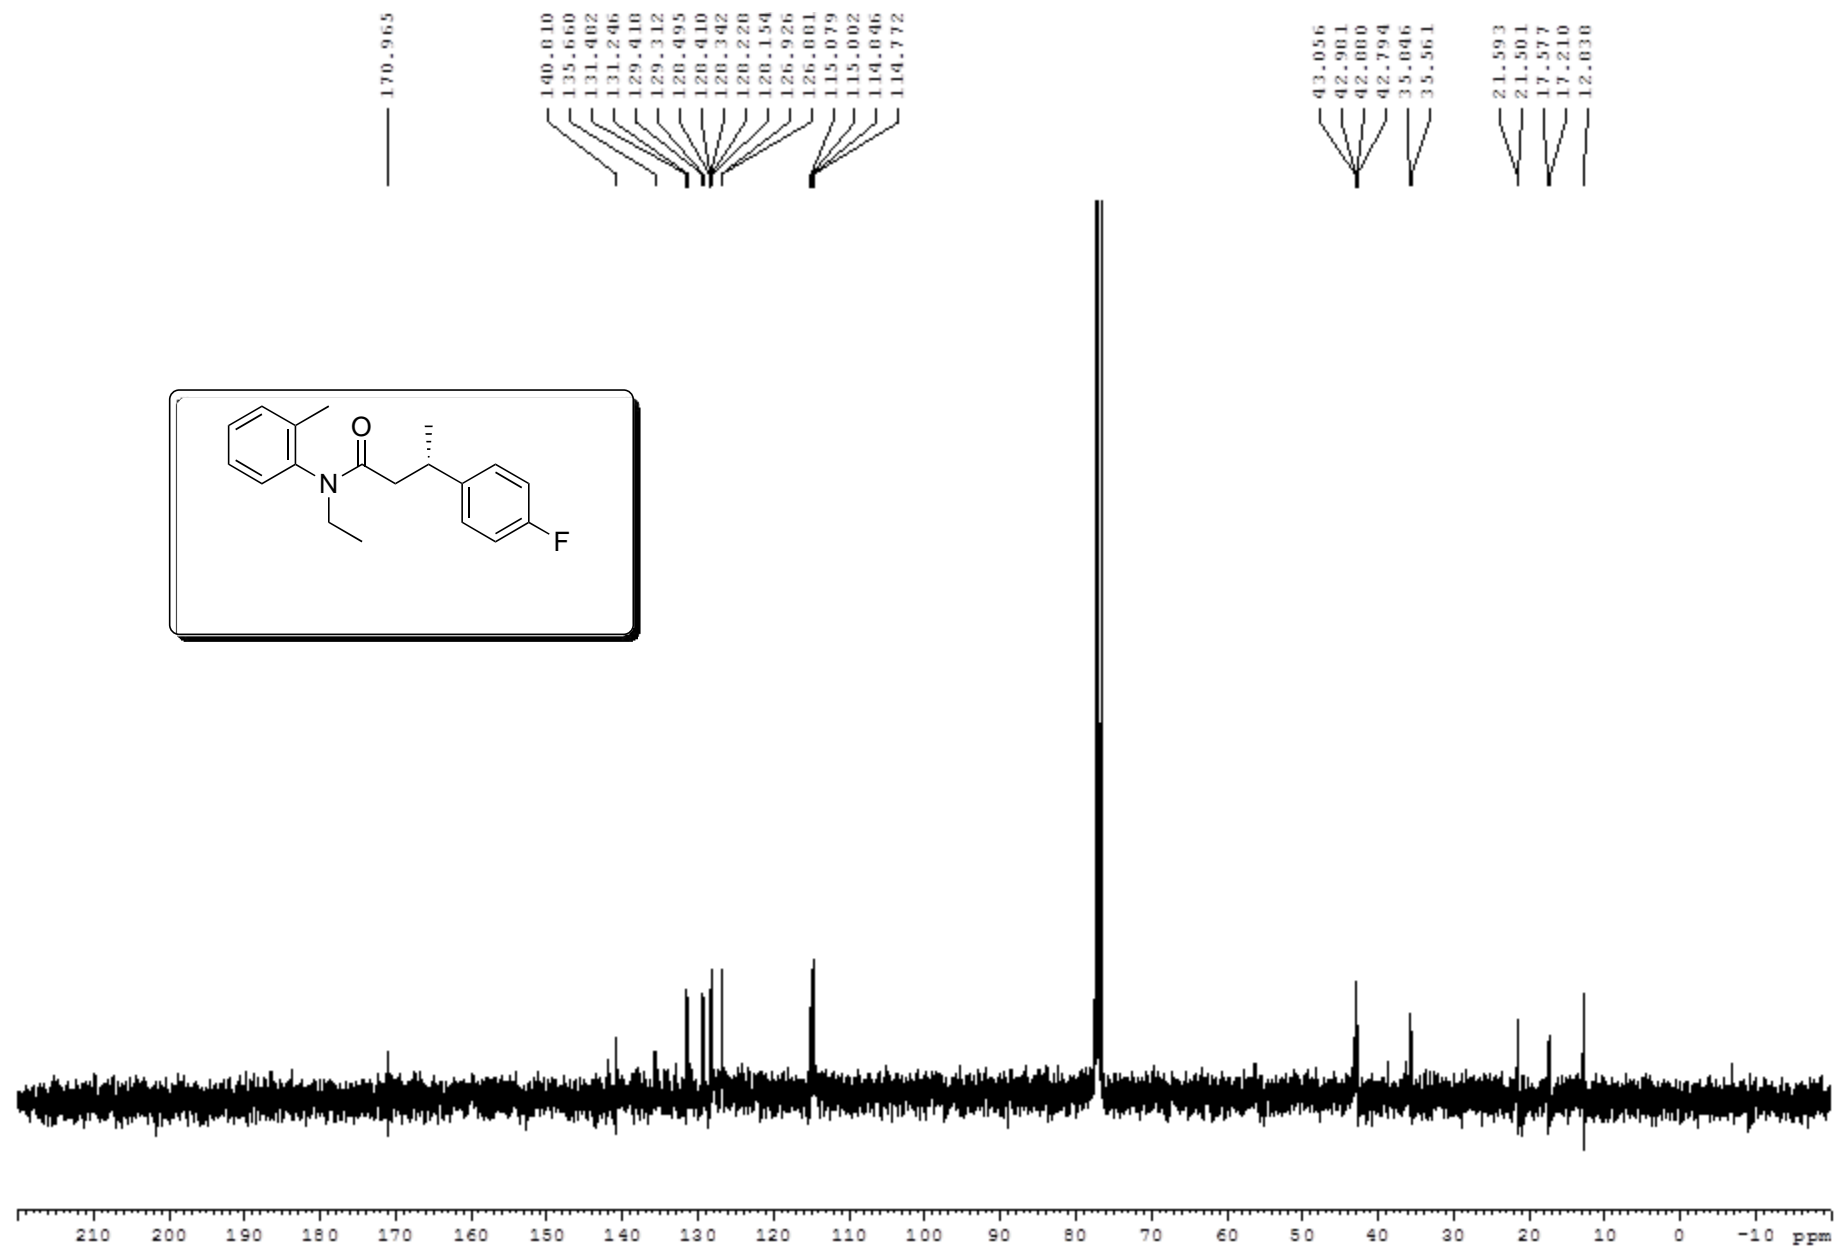

<sup>19</sup>F NMR (CDCl<sub>3</sub>, 338.8 MHz) spectrum of (*S*)-*N*-Ethyl-3-(4-fluorophenyl)-*N*-(*o*-tolyl)butanamide (13c)

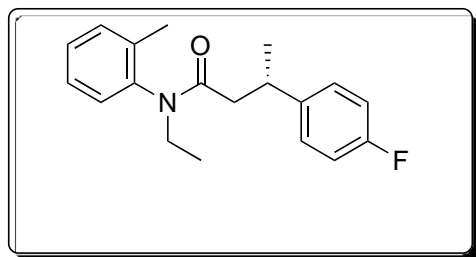

-117.290  
-117.433

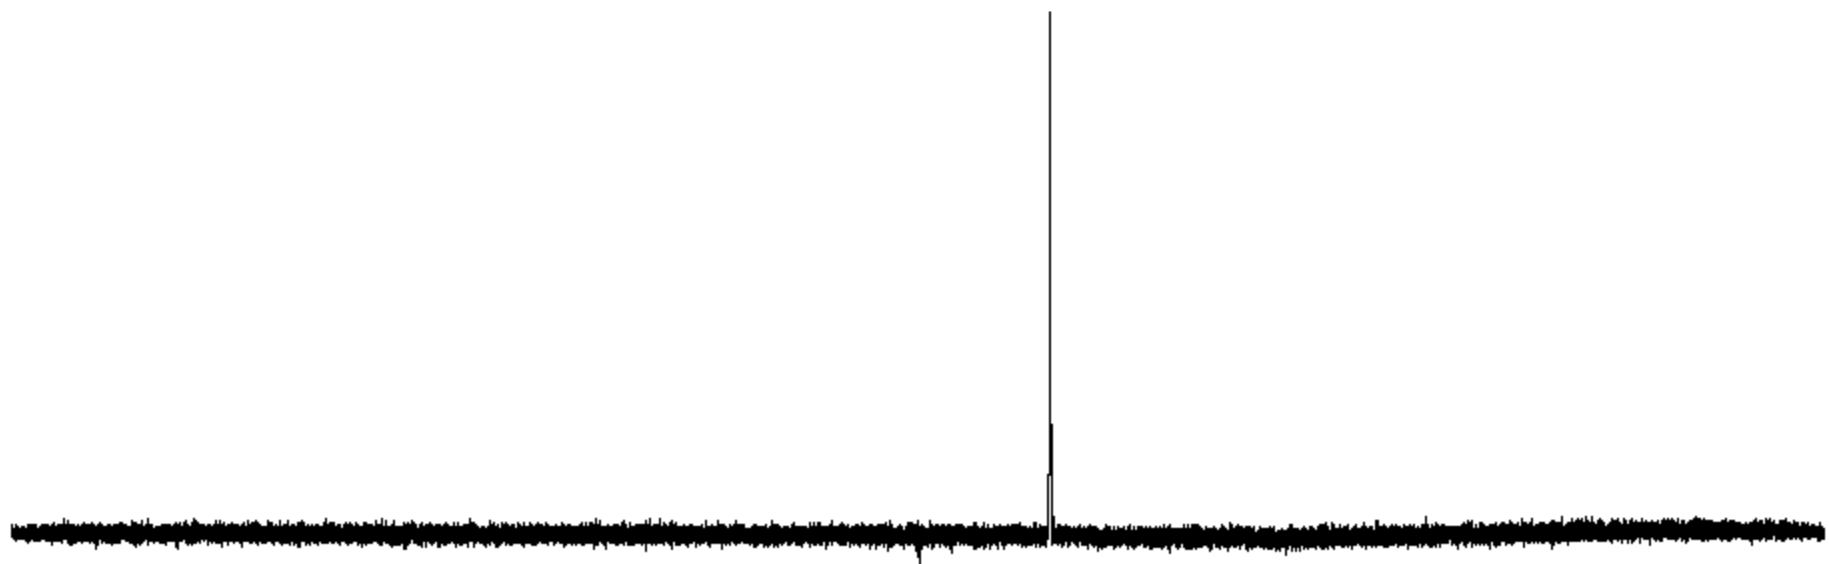

10 0 -10 -20 -30 -40 -50 -60 -70 -80 -90 -100 -110 -120 -130 -140 -150 -160 -170 -180 -190 -200 -210 ppm



<sup>1</sup>H NMR (CDCl<sub>3</sub>, 300 MHz) spectrum of (S)-N-Cyclohexyl-3-(4-fluorophenyl)butanamide (13d)

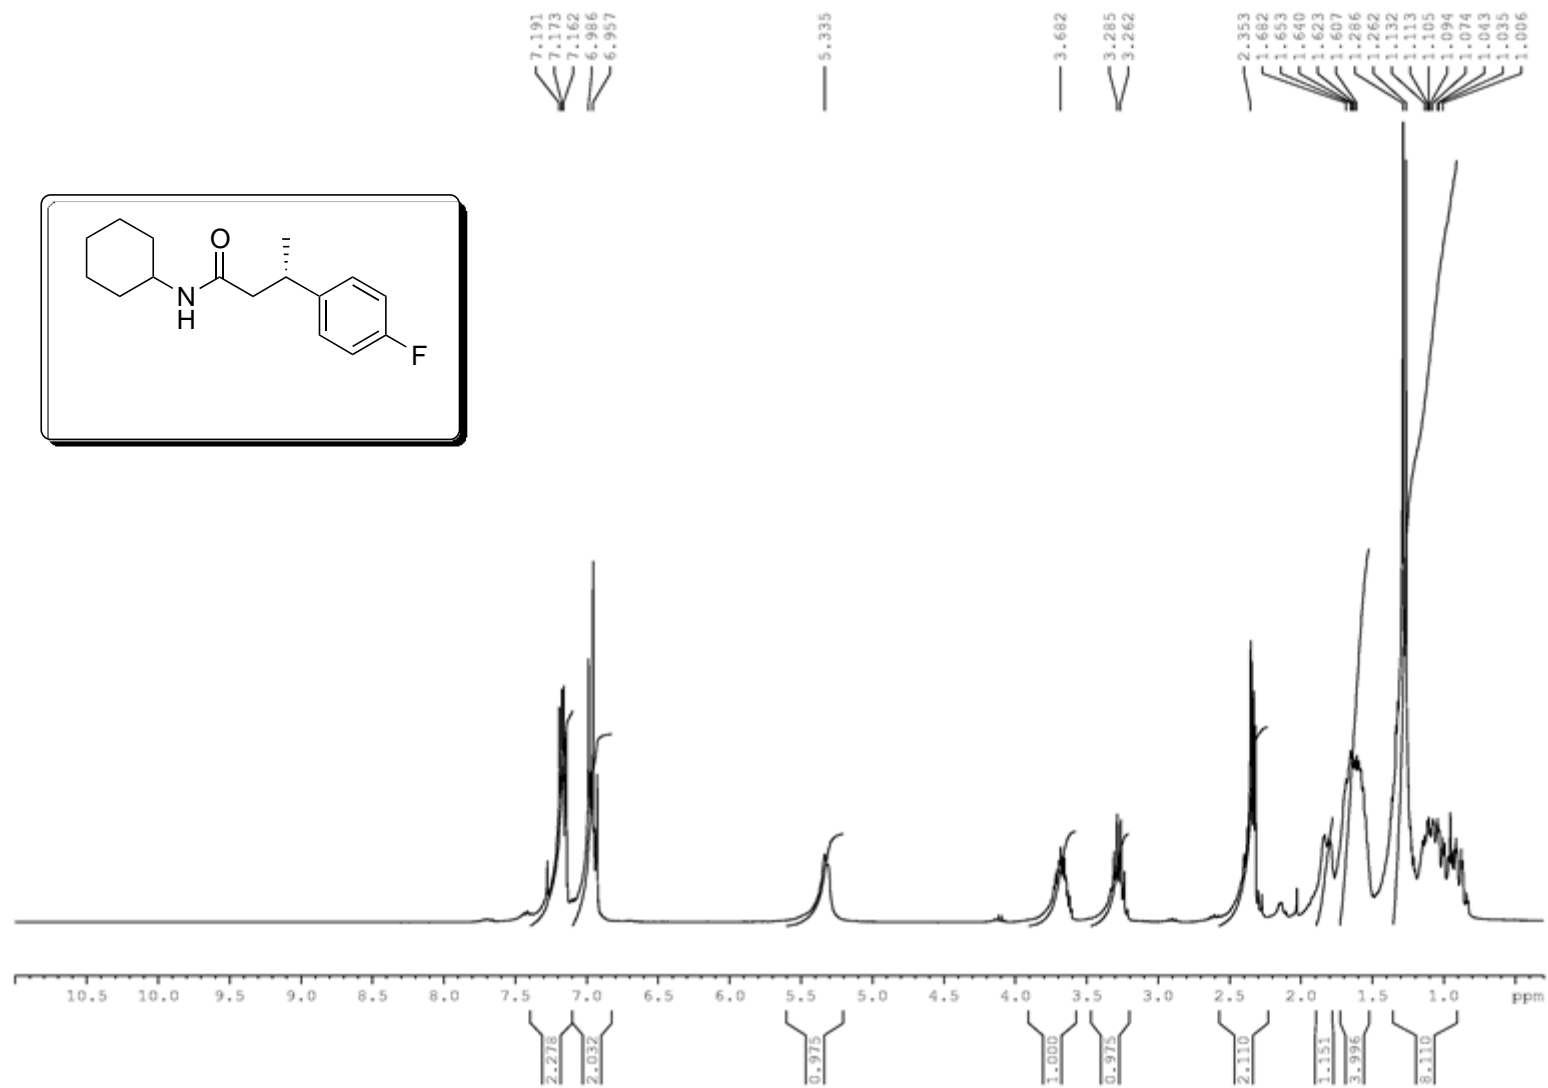

<sup>13</sup>C NMR (CDCl<sub>3</sub>, 75.4 MHz) spectrum of (S)-N-Cyclohexyl-3-(4-fluorophenyl)butanamide (13d)

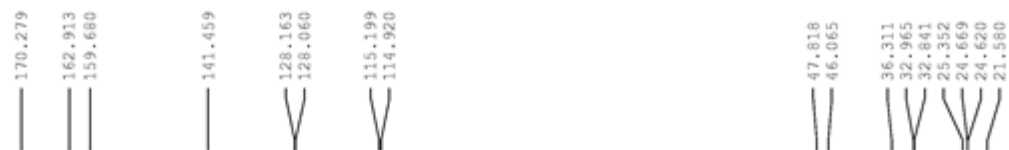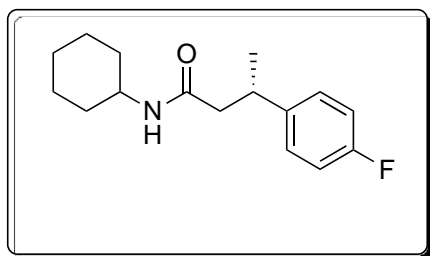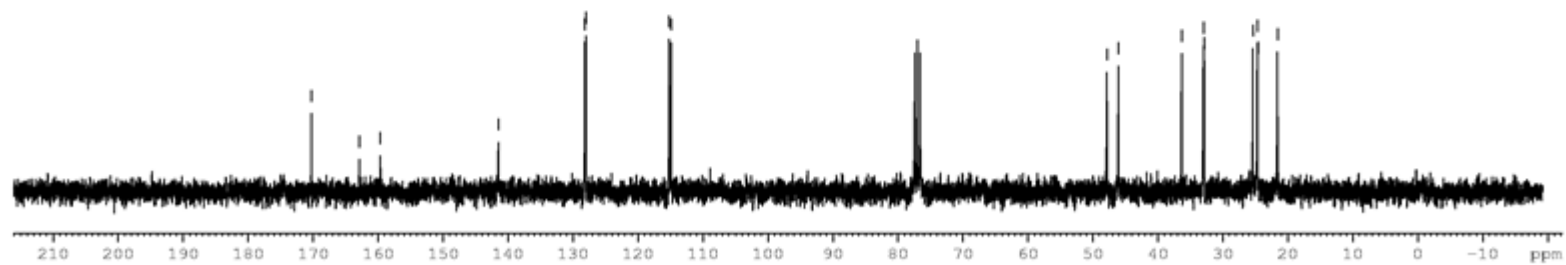

**$^{19}\text{F}$  NMR ( $\text{CDCl}_3$ , 282.4 MHz) spectrum of (*S*)-*N*-Cyclohexyl-3-(4-fluorophenyl)butanamide (13d)**

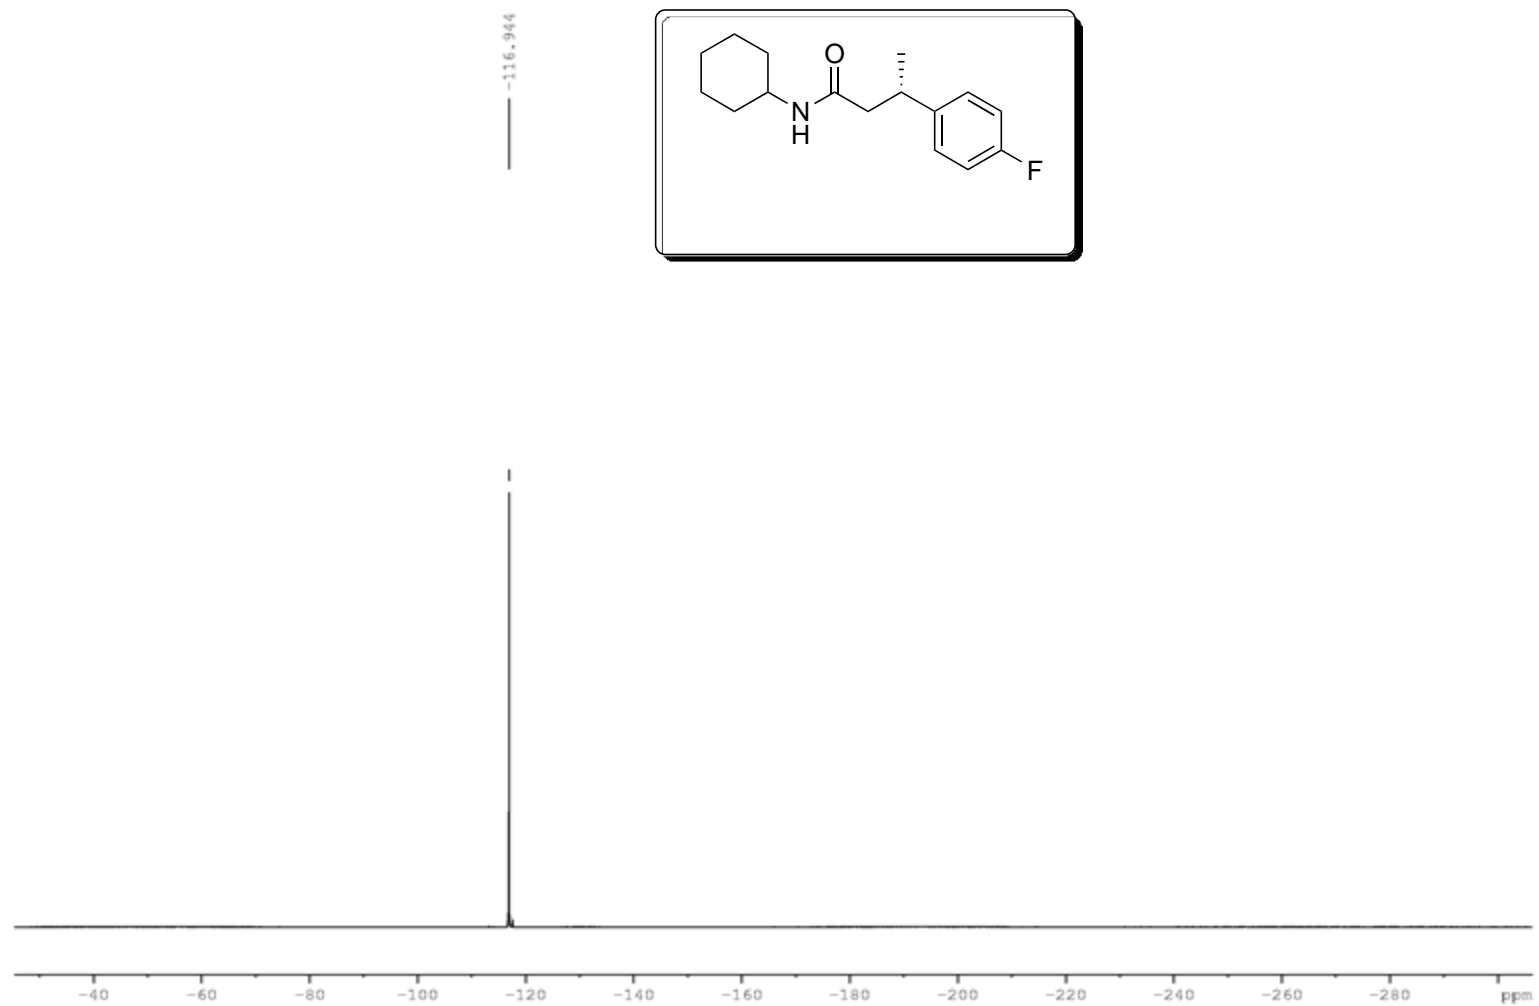

<sup>1</sup>H NMR (CDCl<sub>3</sub>, 360 MHz) spectrum of (S)-N-Cyclohexyl-3-(4-fluorophenyl)pentanamide (13e)

7.267  
7.137  
7.122  
7.000  
6.903  
4.950  
3.646  
3.634  
3.622  
3.000  
2.992  
2.976  
2.966  
2.466  
2.449  
2.277  
2.252  
1.769  
1.629  
1.299  
1.279  
1.250  
1.253  
1.243  
0.963  
0.009  
0.760

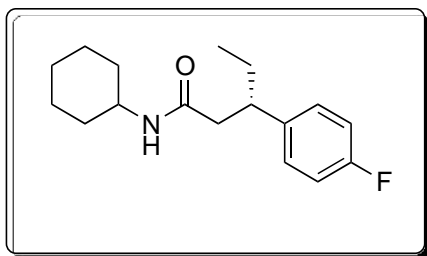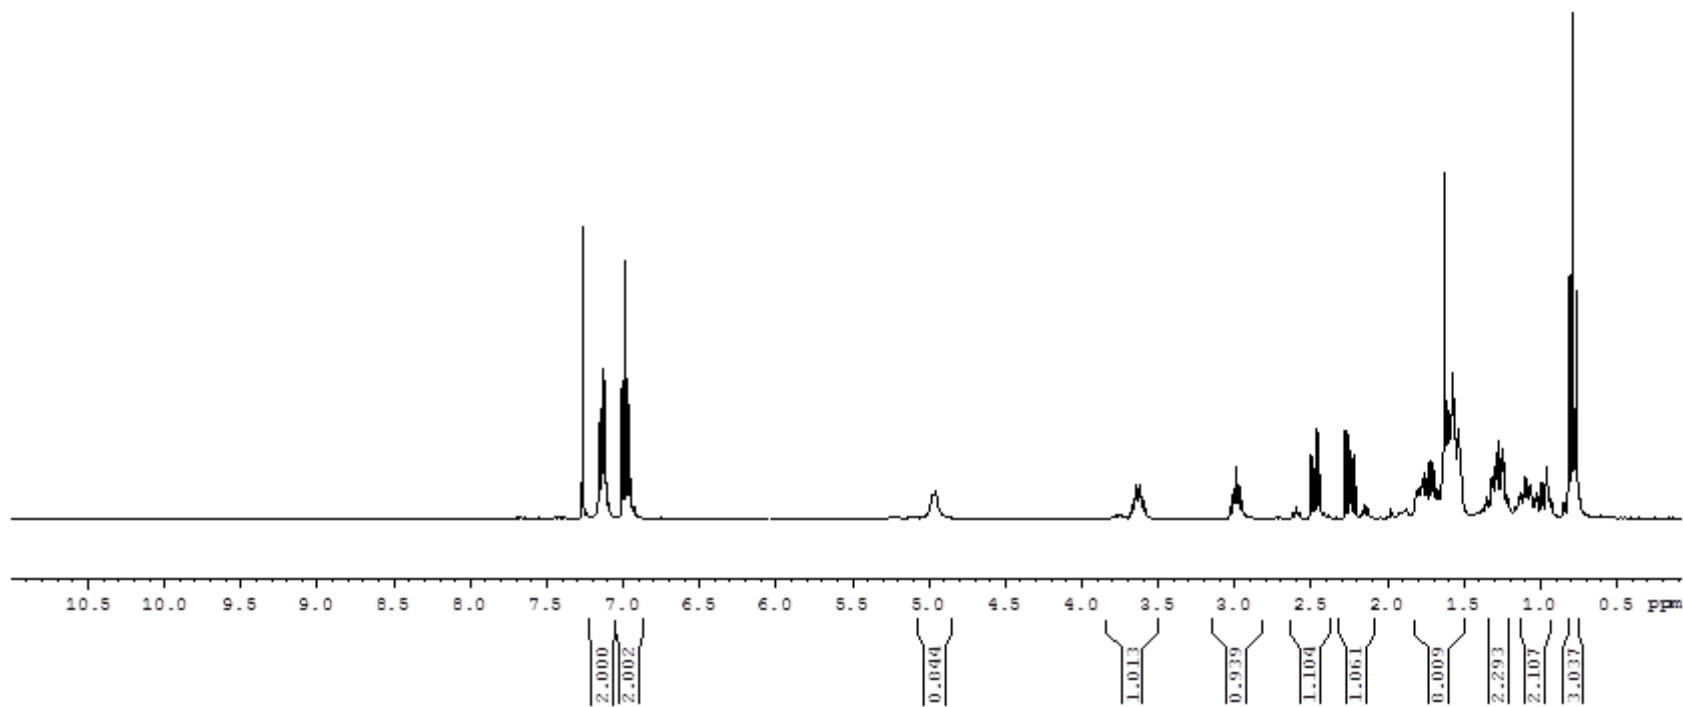

<sup>13</sup>C NMR (CDCl<sub>3</sub>, 125.8 MHz) spectrum of (S)-N-Cyclohexyl-3-(4-fluorophenyl)pentanamide (13e)

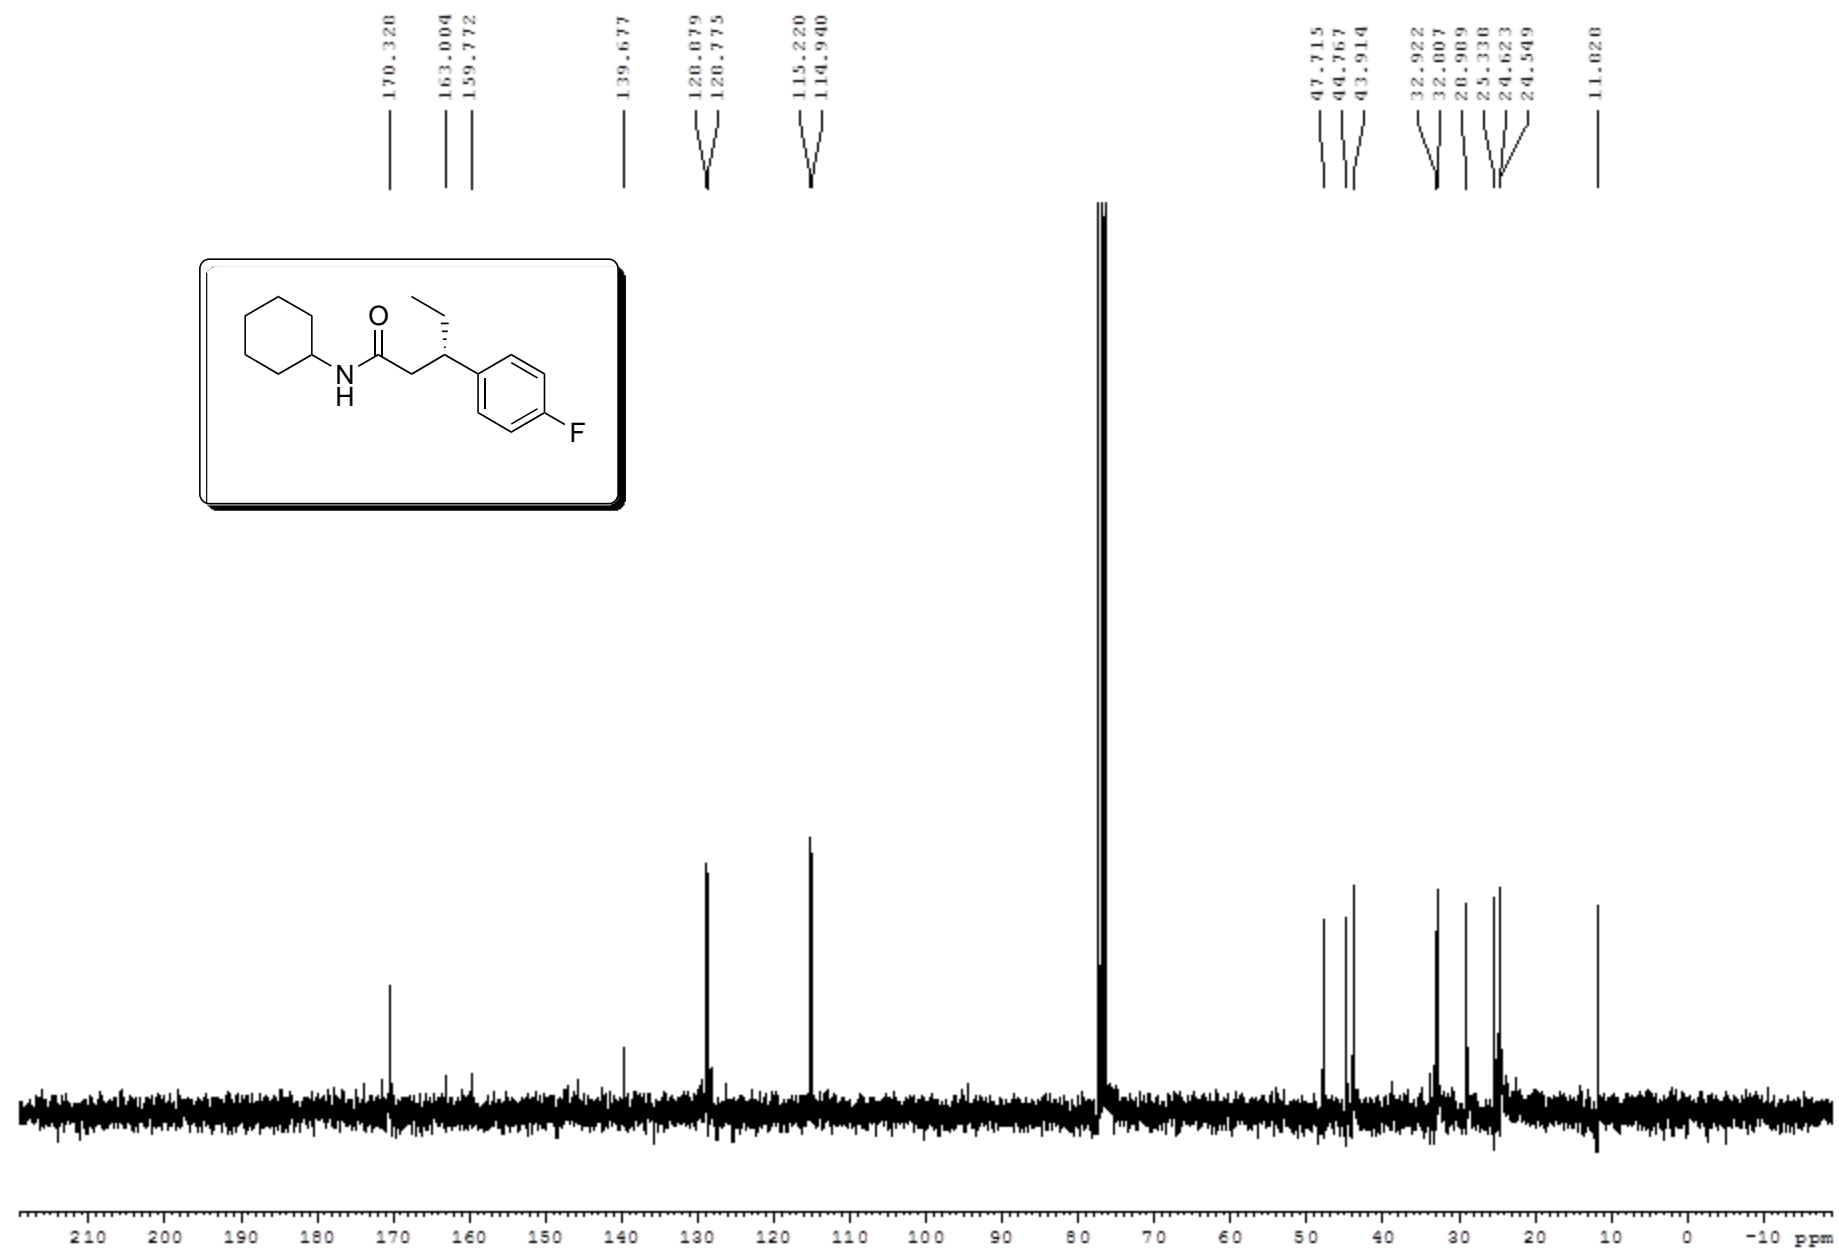

**$^{19}\text{F}$  NMR (DMSO, 470.8 MHz) spectrum of (*S*)-*N*-Cyclohexyl-3-(4-fluorophenyl)pentanamide (13e)**

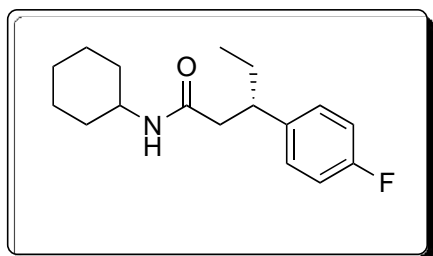

-116.893

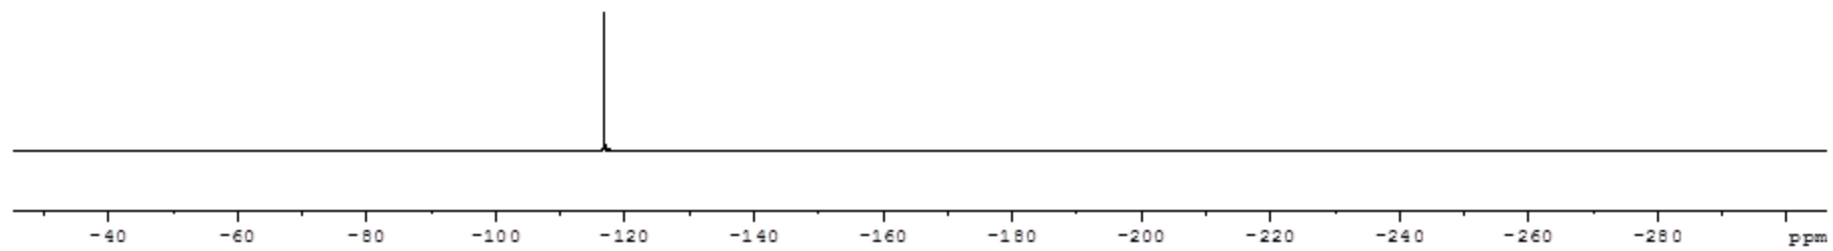

S230

**<sup>1</sup>H NMR (Acetone, 500 MHz) spectrum of potassium (*R*)-*N*-(4-methoxyphenyl)-3-(trifluoroborato)butanamide (2a) from borylation with tetrakis(dimethylamino)diboron**

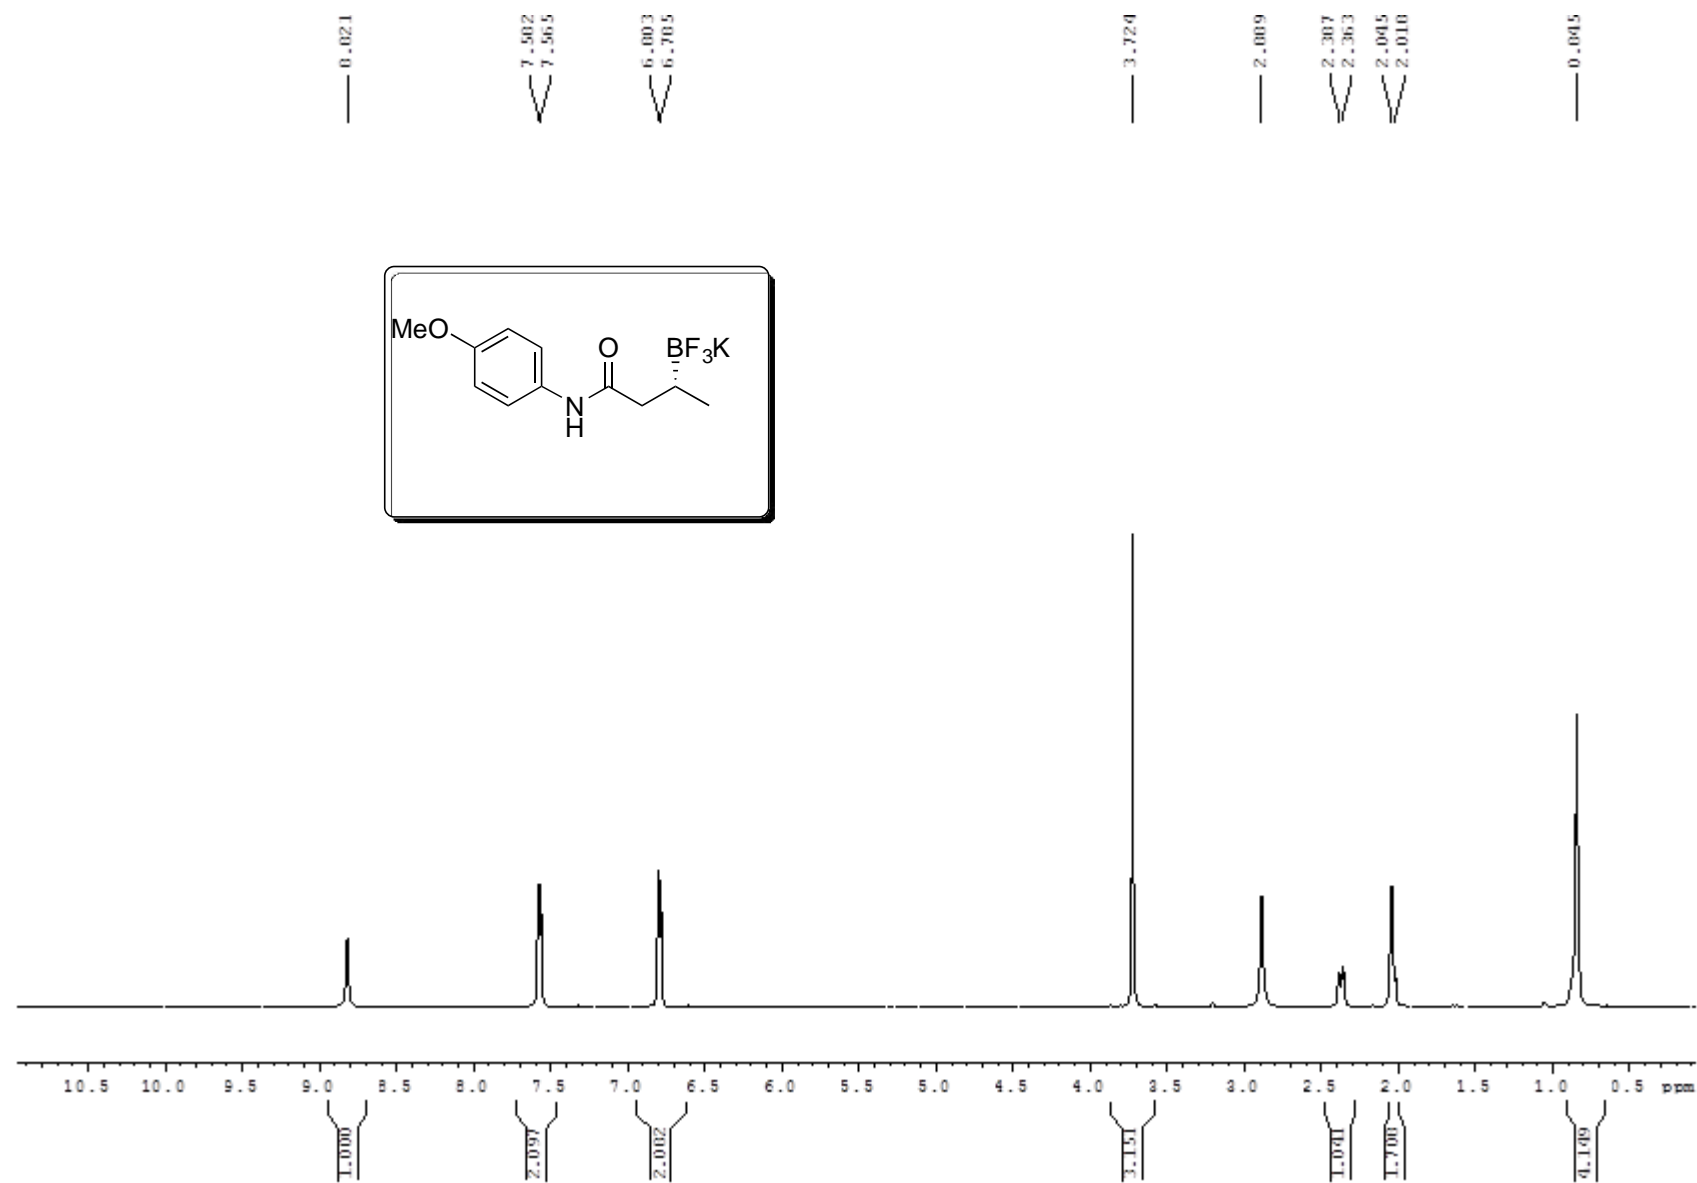

**$^{13}\text{C}$  NMR (DMSO, 125.8 MHz) spectrum of potassium (*R*)-*N*-(4-methoxyphenyl)-3-(trifluoroborato)butanamide (2a) from borylation with tetrakis(dimethylamino)diboron**

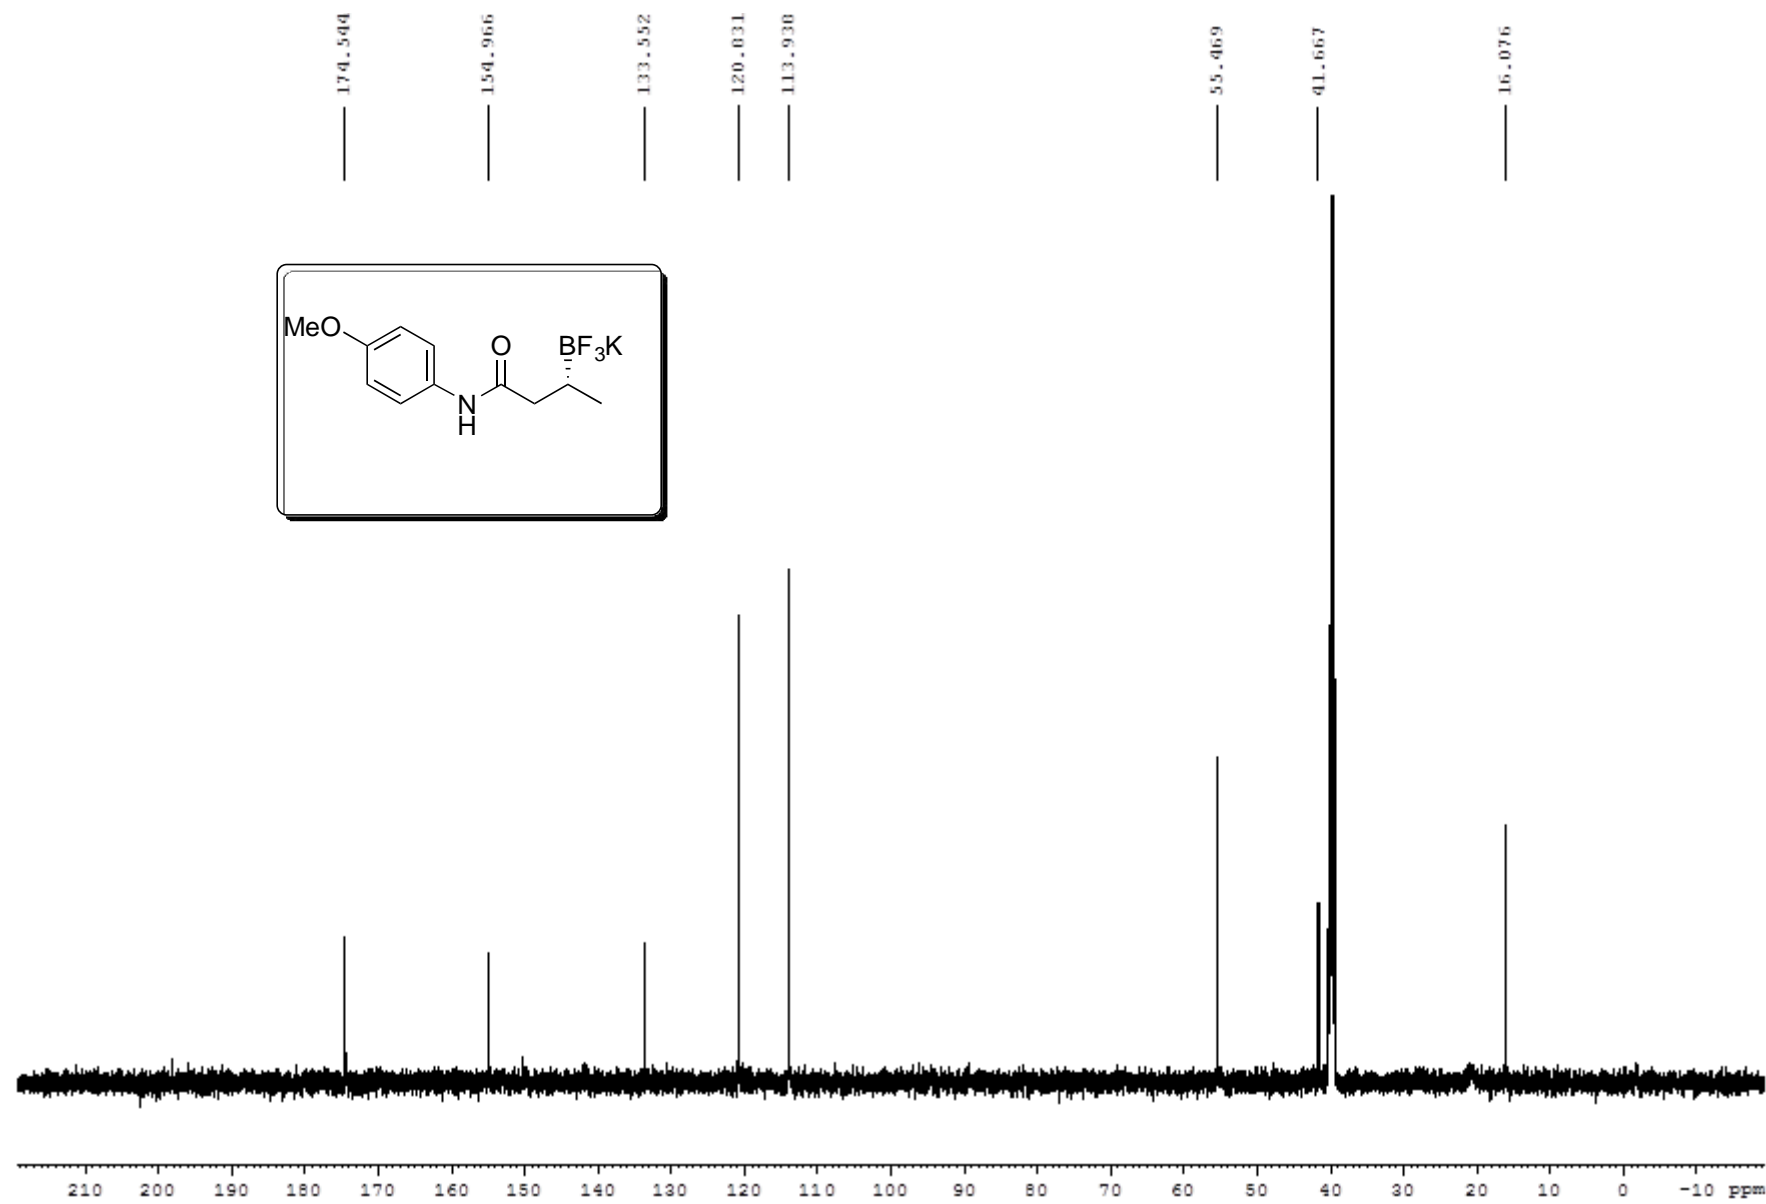



**$^{19}\text{F}$  NMR (Acetone, 470.8 MHz) spectrum of potassium (*R*)-*N*-(4-methoxyphenyl)-3-(trifluoroborato)butanamide (2a) from borylation with tetrakis(dimethylamino)diboron**

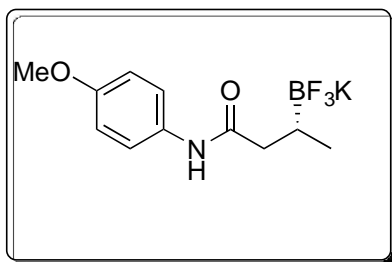

-144.965

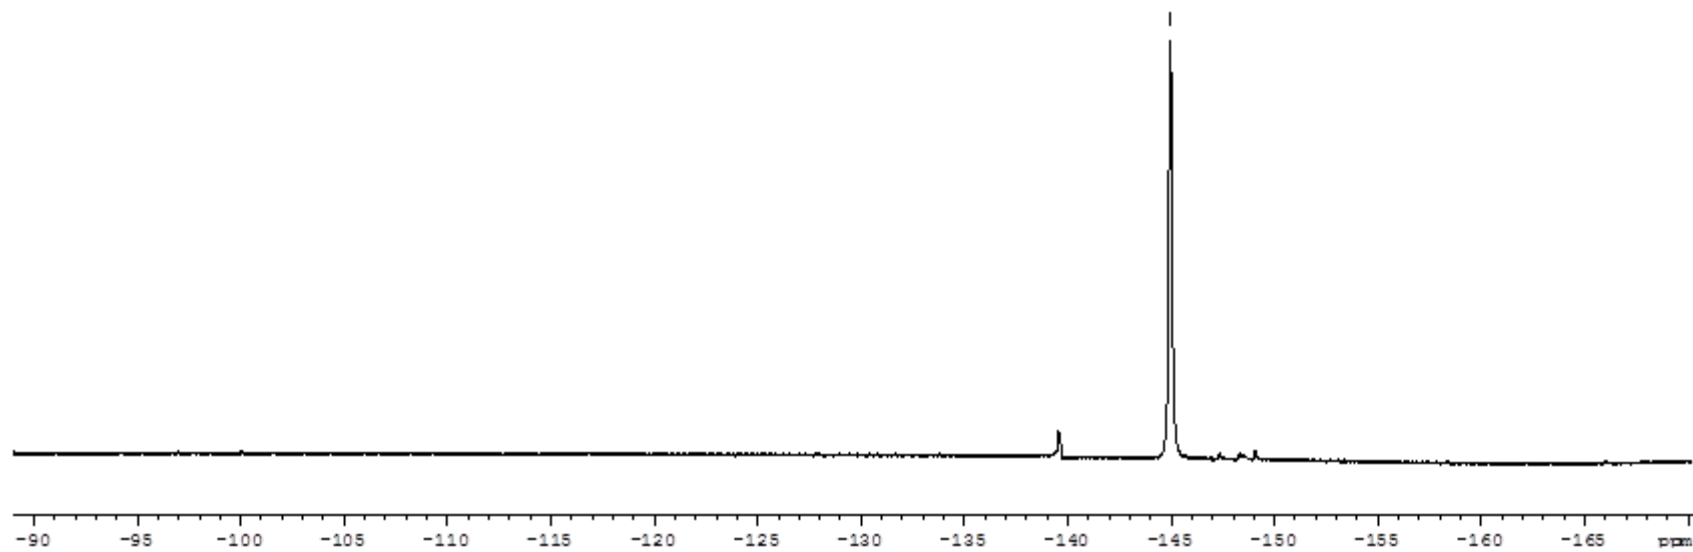

S233

**$^{11}\text{B}$  NMR (Acetone, 128.4 MHz) spectrum of potassium (*R*)-*N*-(4-methoxyphenyl)-3-(trifluoroborato)butanamide (2a) from borylation with tetrakis(dimethylamino)diboron**

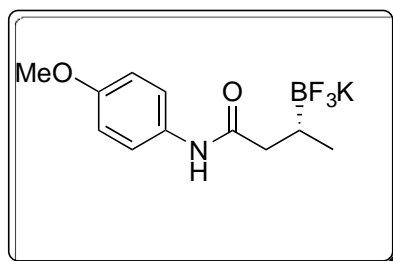

5.232

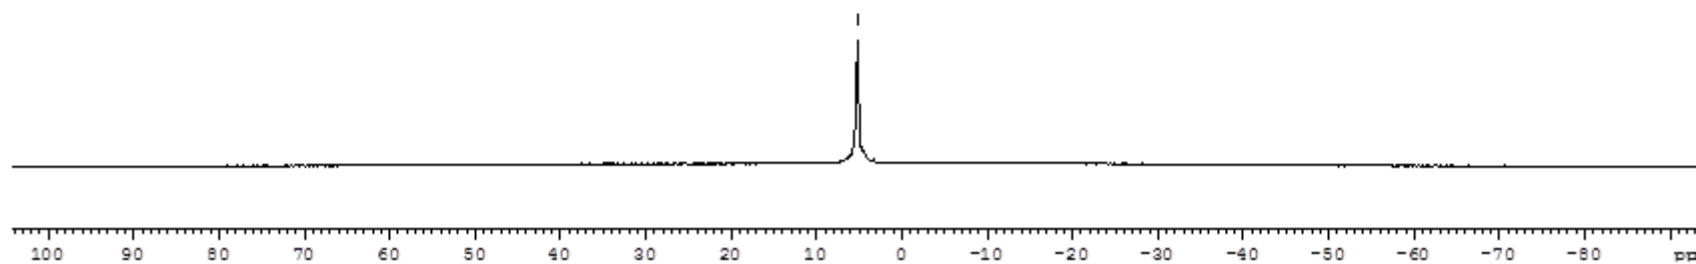

S234

$^1\text{H}$  NMR (DMSO, 500 MHz) spectrum of potassium (*R*)-*N*-cyclohexyl-3-(trifluoroborato)butanamide (**2d**) from borylation with tetrakis(dimethylamino)diboron

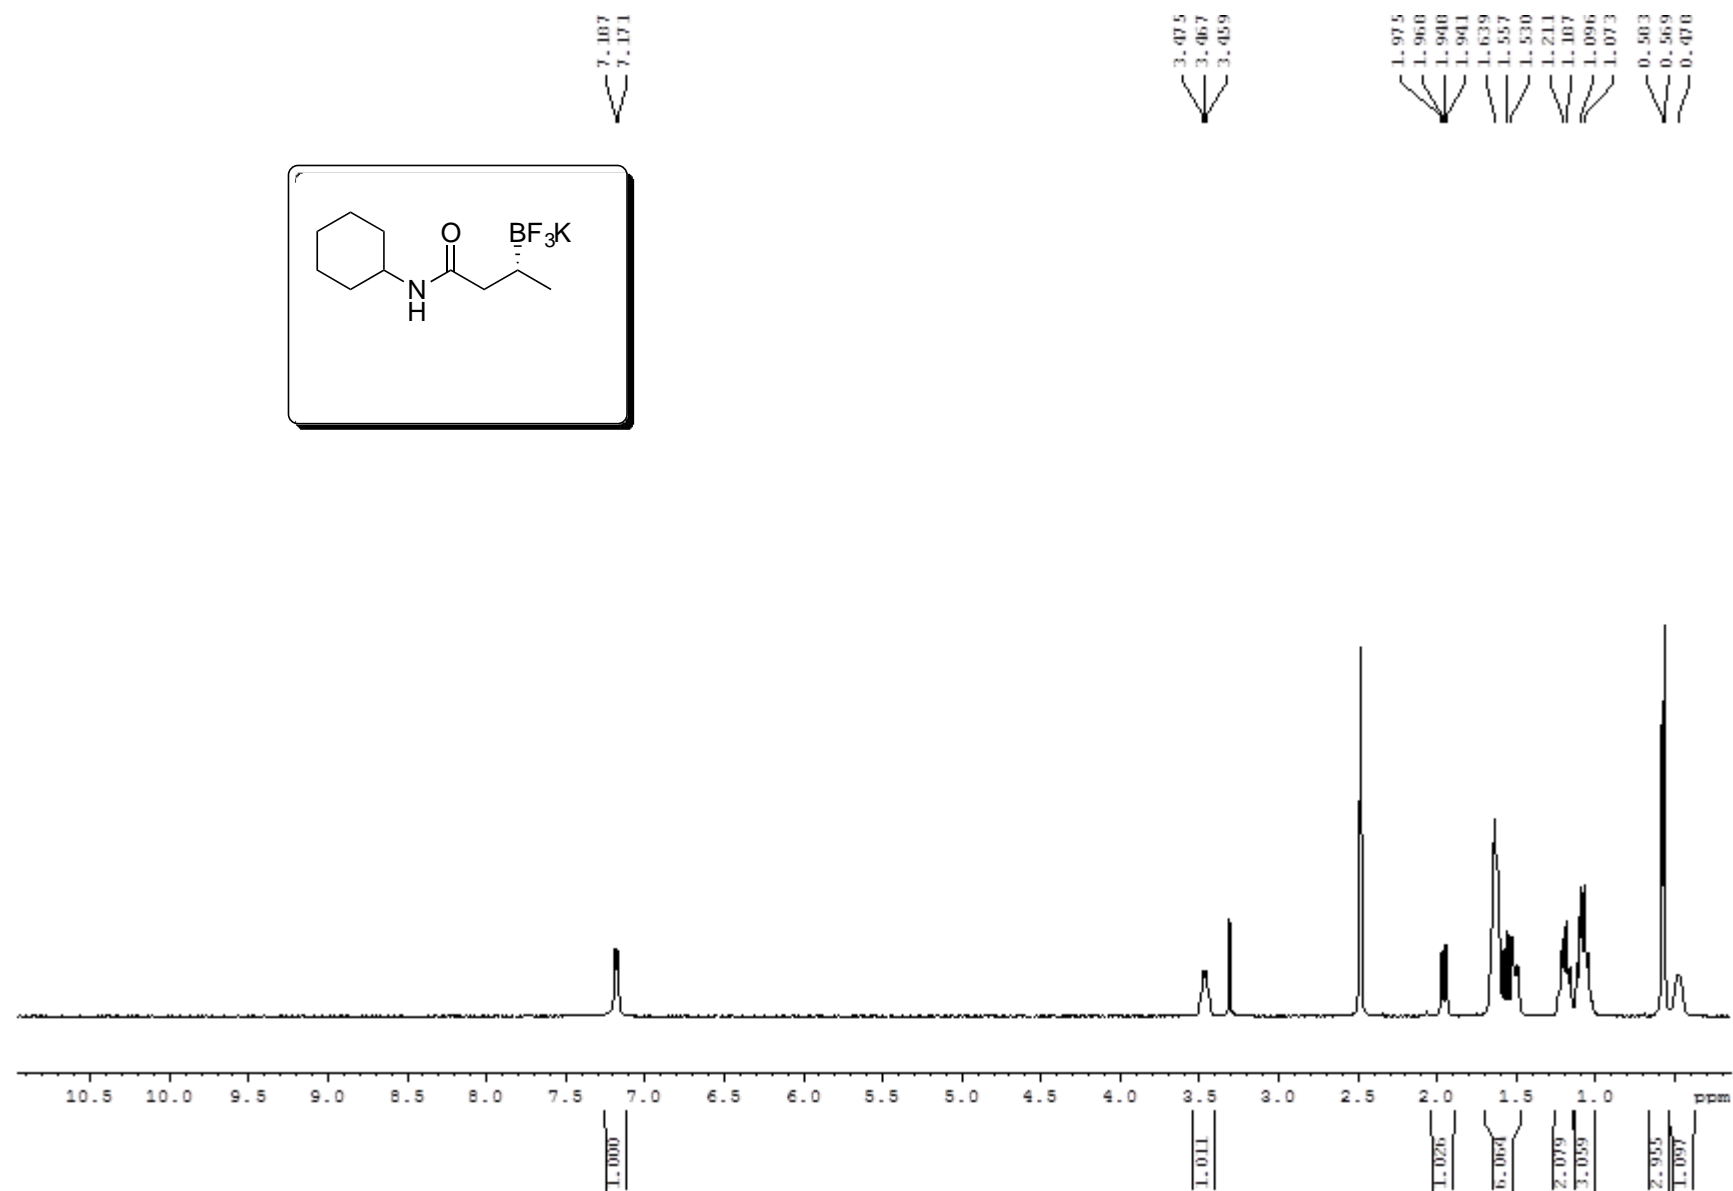

<sup>13</sup>C NMR (DMSO, 125.8 MHz) spectrum of potassium (*R*)-*N*-cyclohexyl-3-(trifluoroborato)butanamide (2d) from borylation with tetrakis(dimethylamino)diboron

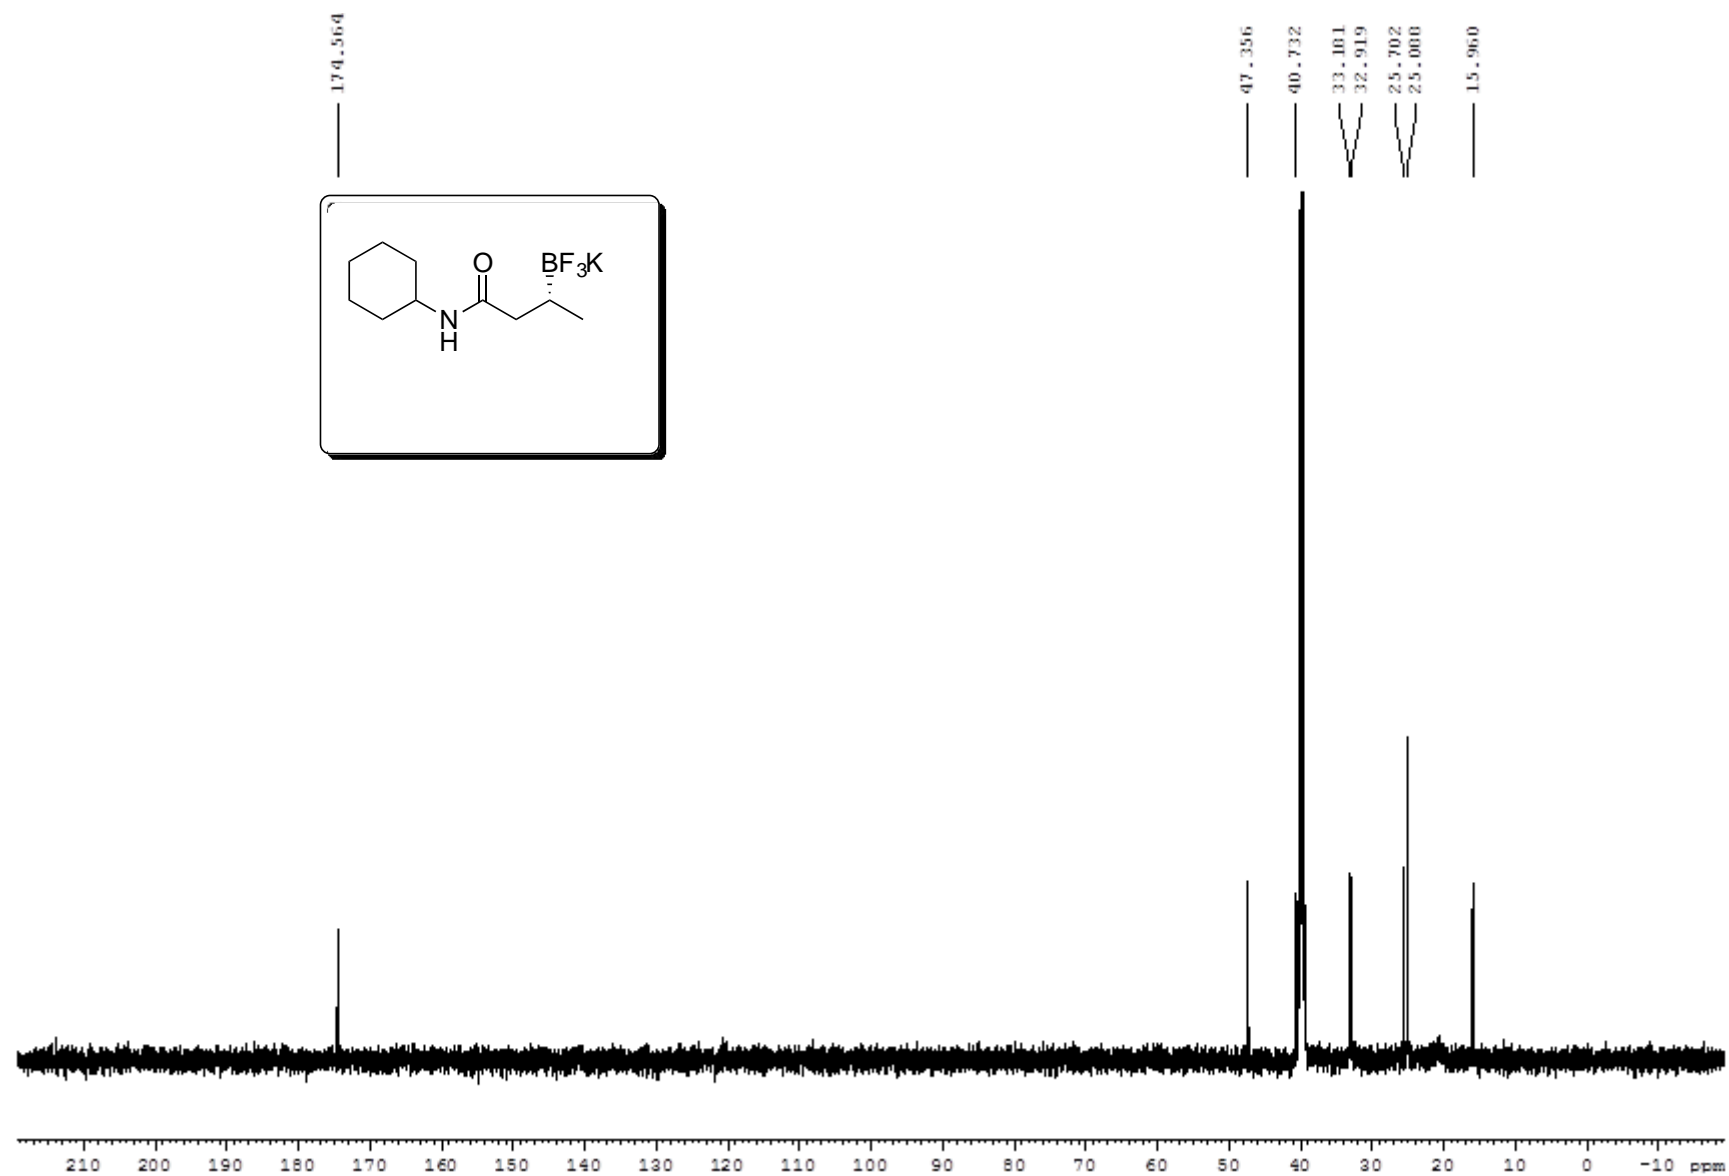

**$^{19}\text{F}$  NMR (DMSO, 470.8 MHz) spectrum of potassium (*R*)-*N*-cyclohexyl-3-(trifluoroborato)butanamide (2d) from borylation with tetrakis(dimethylamino)diboron**

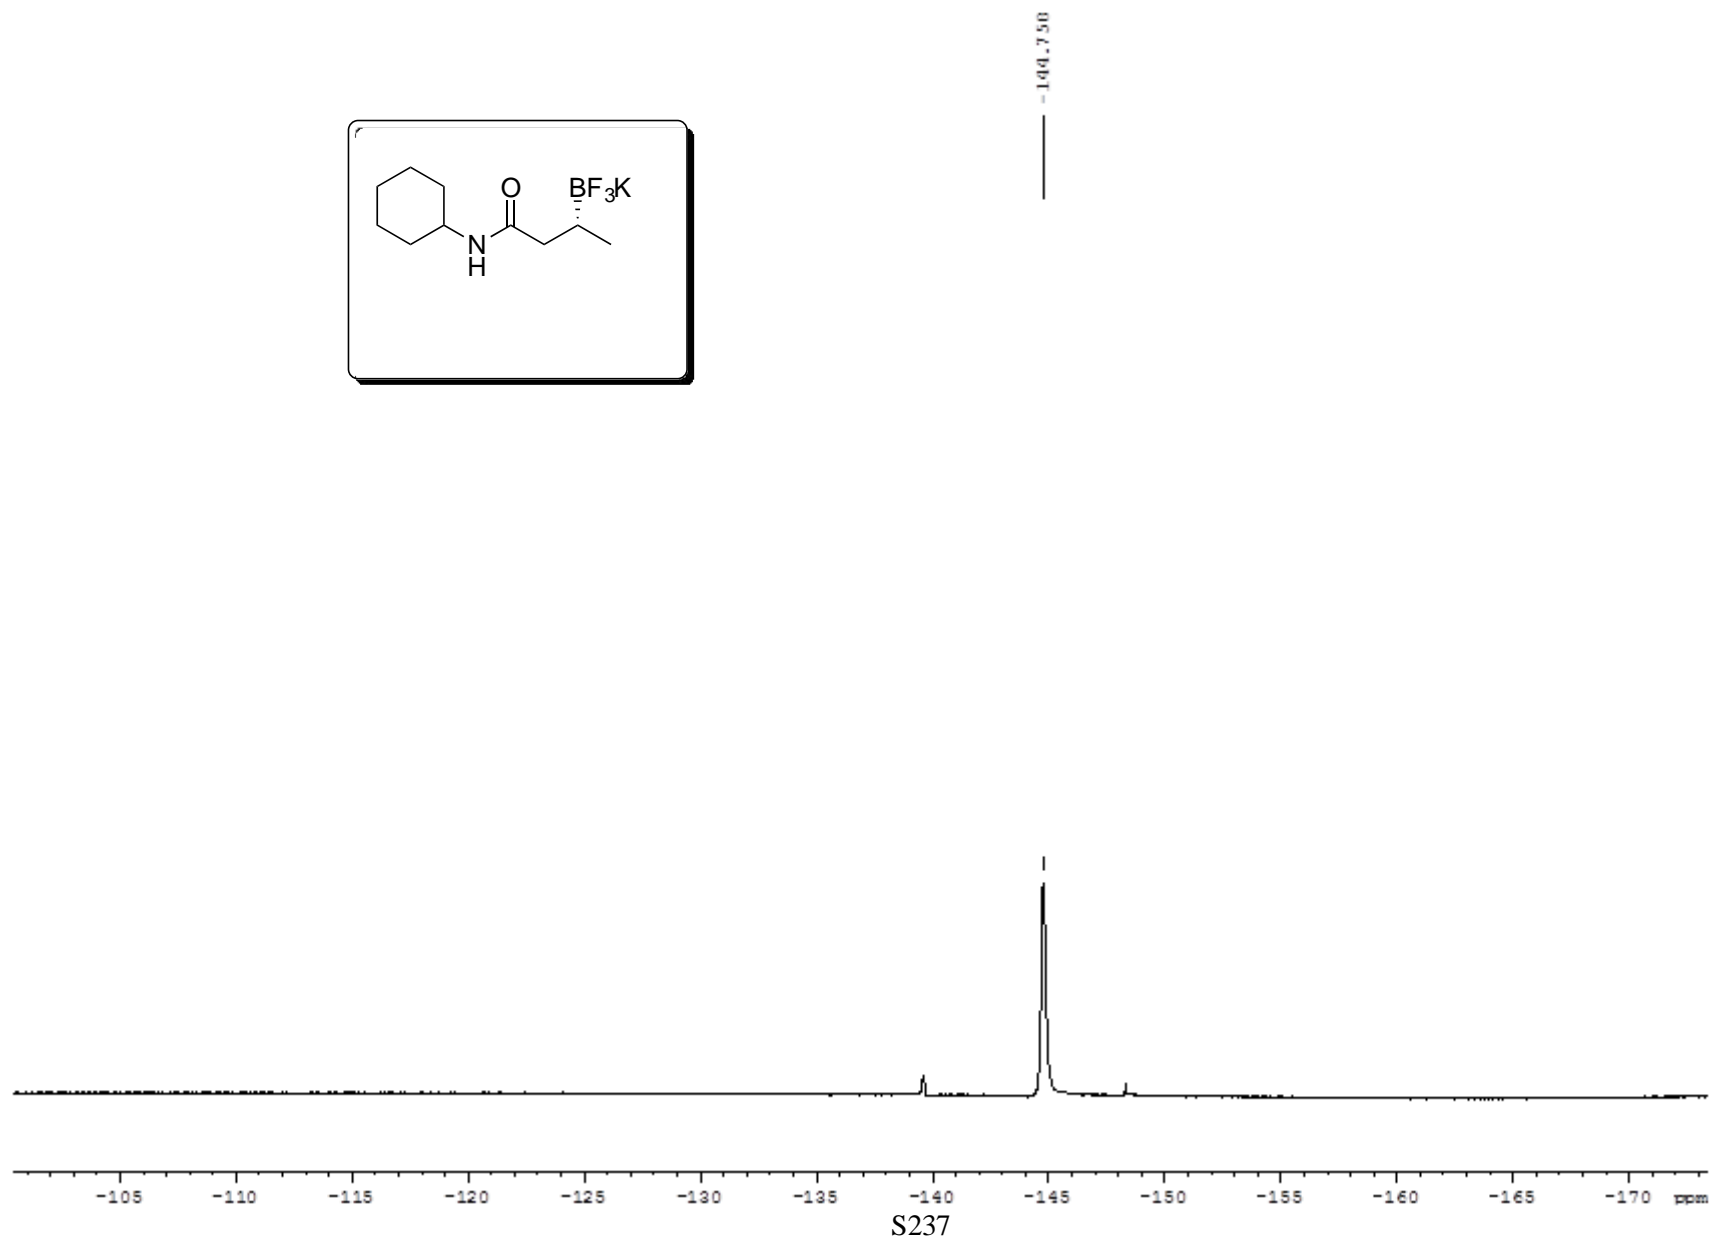

$^{11}\text{B}$  NMR (DMSO, 128.4 MHz) spectrum of potassium (*R*)-*N*-cyclohexyl-3-(trifluoroborato)butanamide (2d) from borylation with tetrakis(dimethylamino)diboron

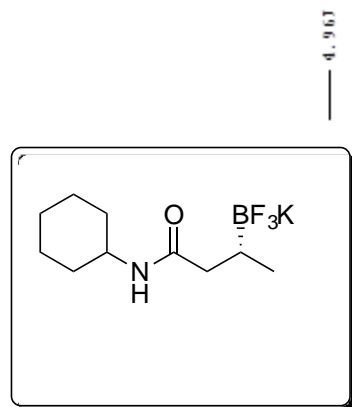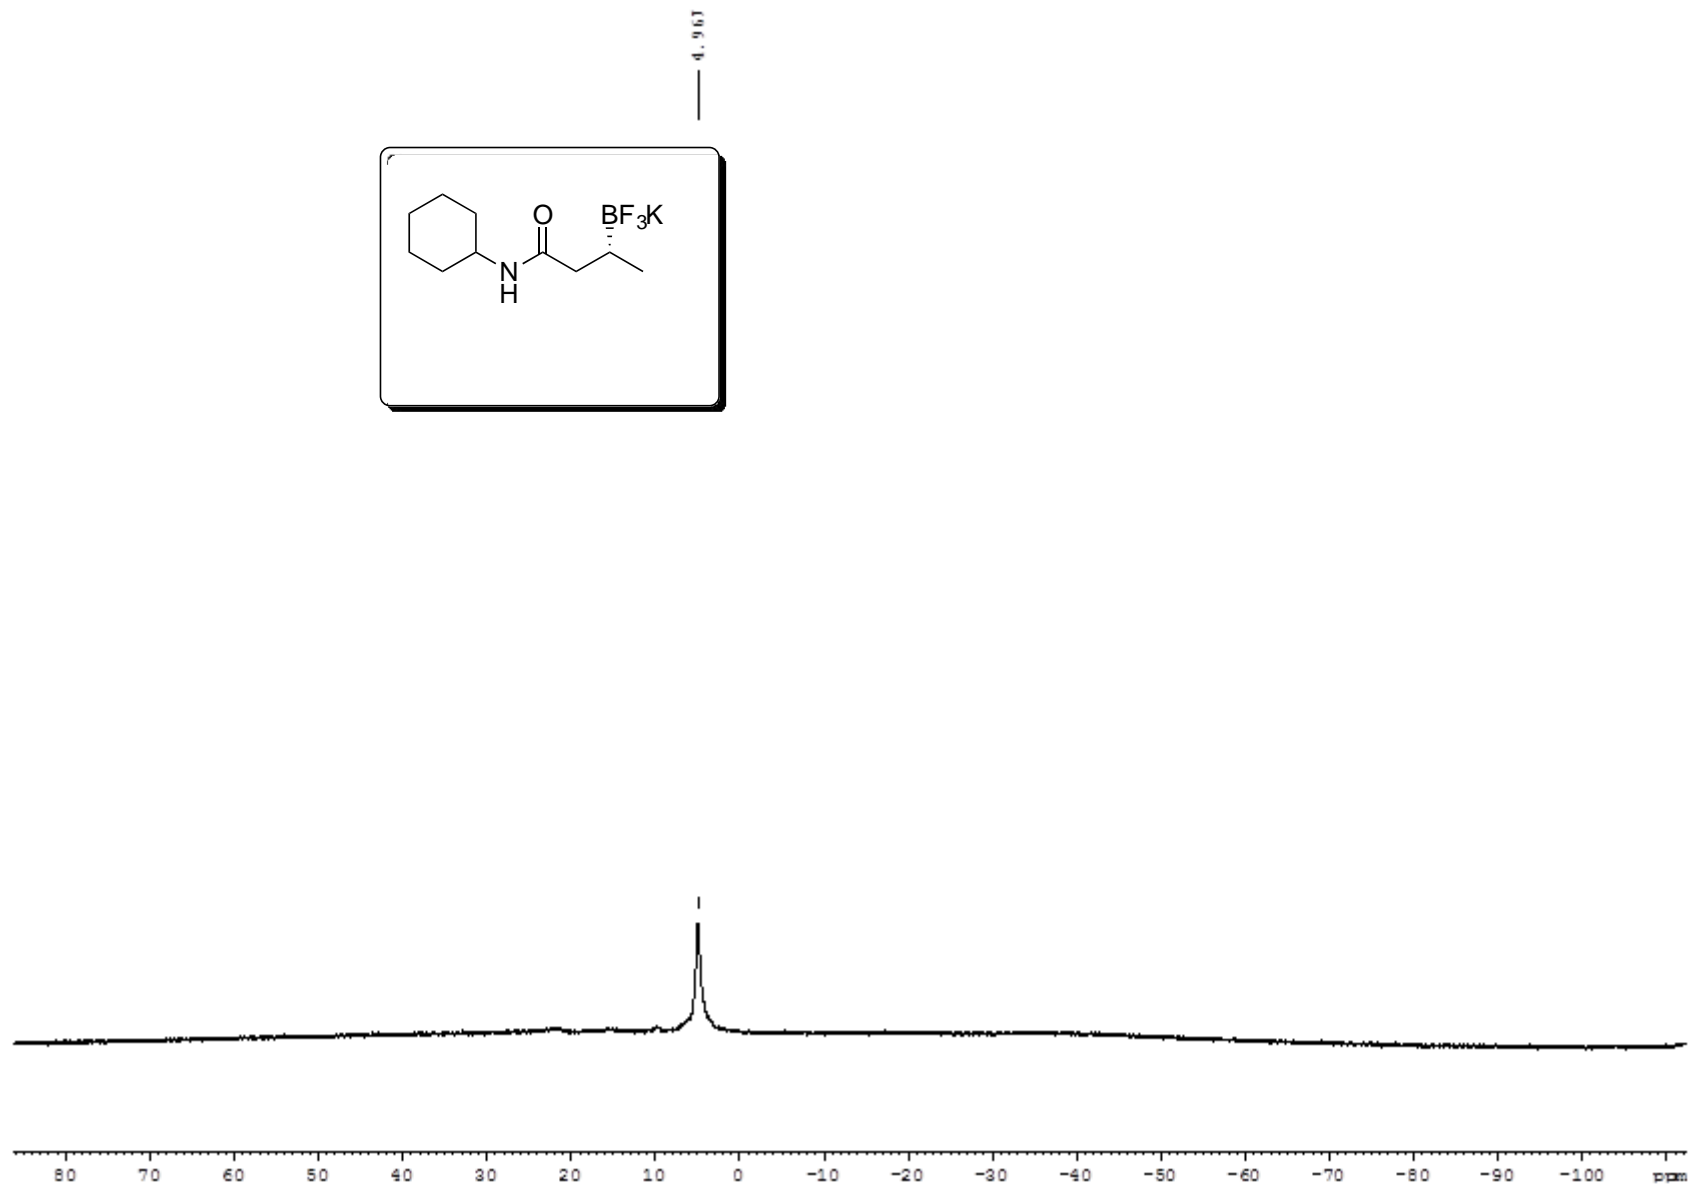

S238

<sup>1</sup>H NMR (DMSO, 500 MHz) spectrum of potassium (*R*)- 1-morpholino-3-(trifluoroborato)butan-1-one (2h) from borylation with tetrakis(dimethylamino)diboron

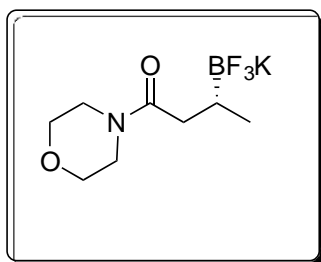

3.515  
3.505  
3.401  
3.376  
3.309

2.310  
2.291

1.704  
1.680  
1.654

0.652  
0.636  
0.414

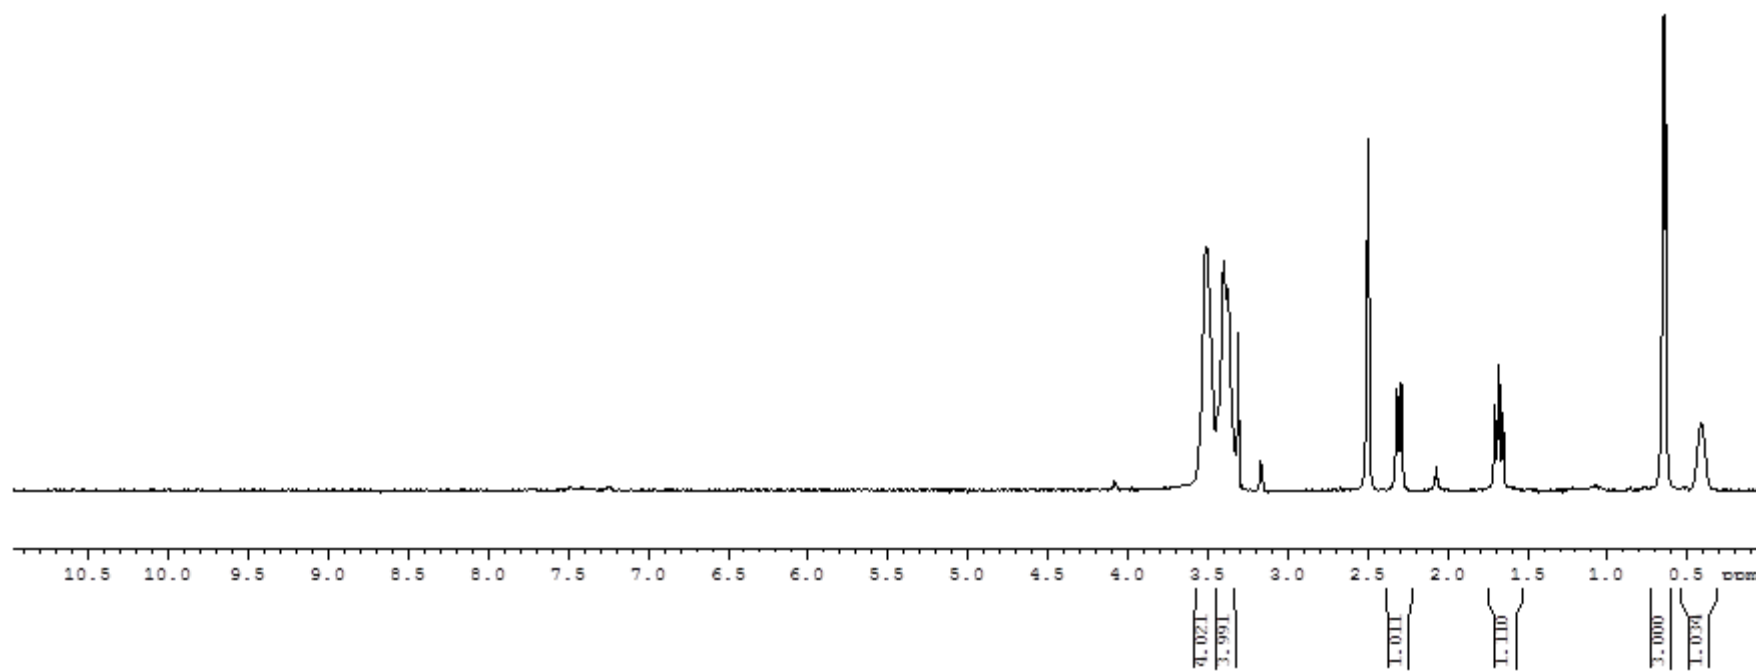

<sup>13</sup>C NMR (DMSO, 125.8 MHz) spectrum of potassium (*R*)-1-morpholino-3-(trifluoroborato)butan-1-one (2h) from borylation with tetrakis(dimethylamino)diboron

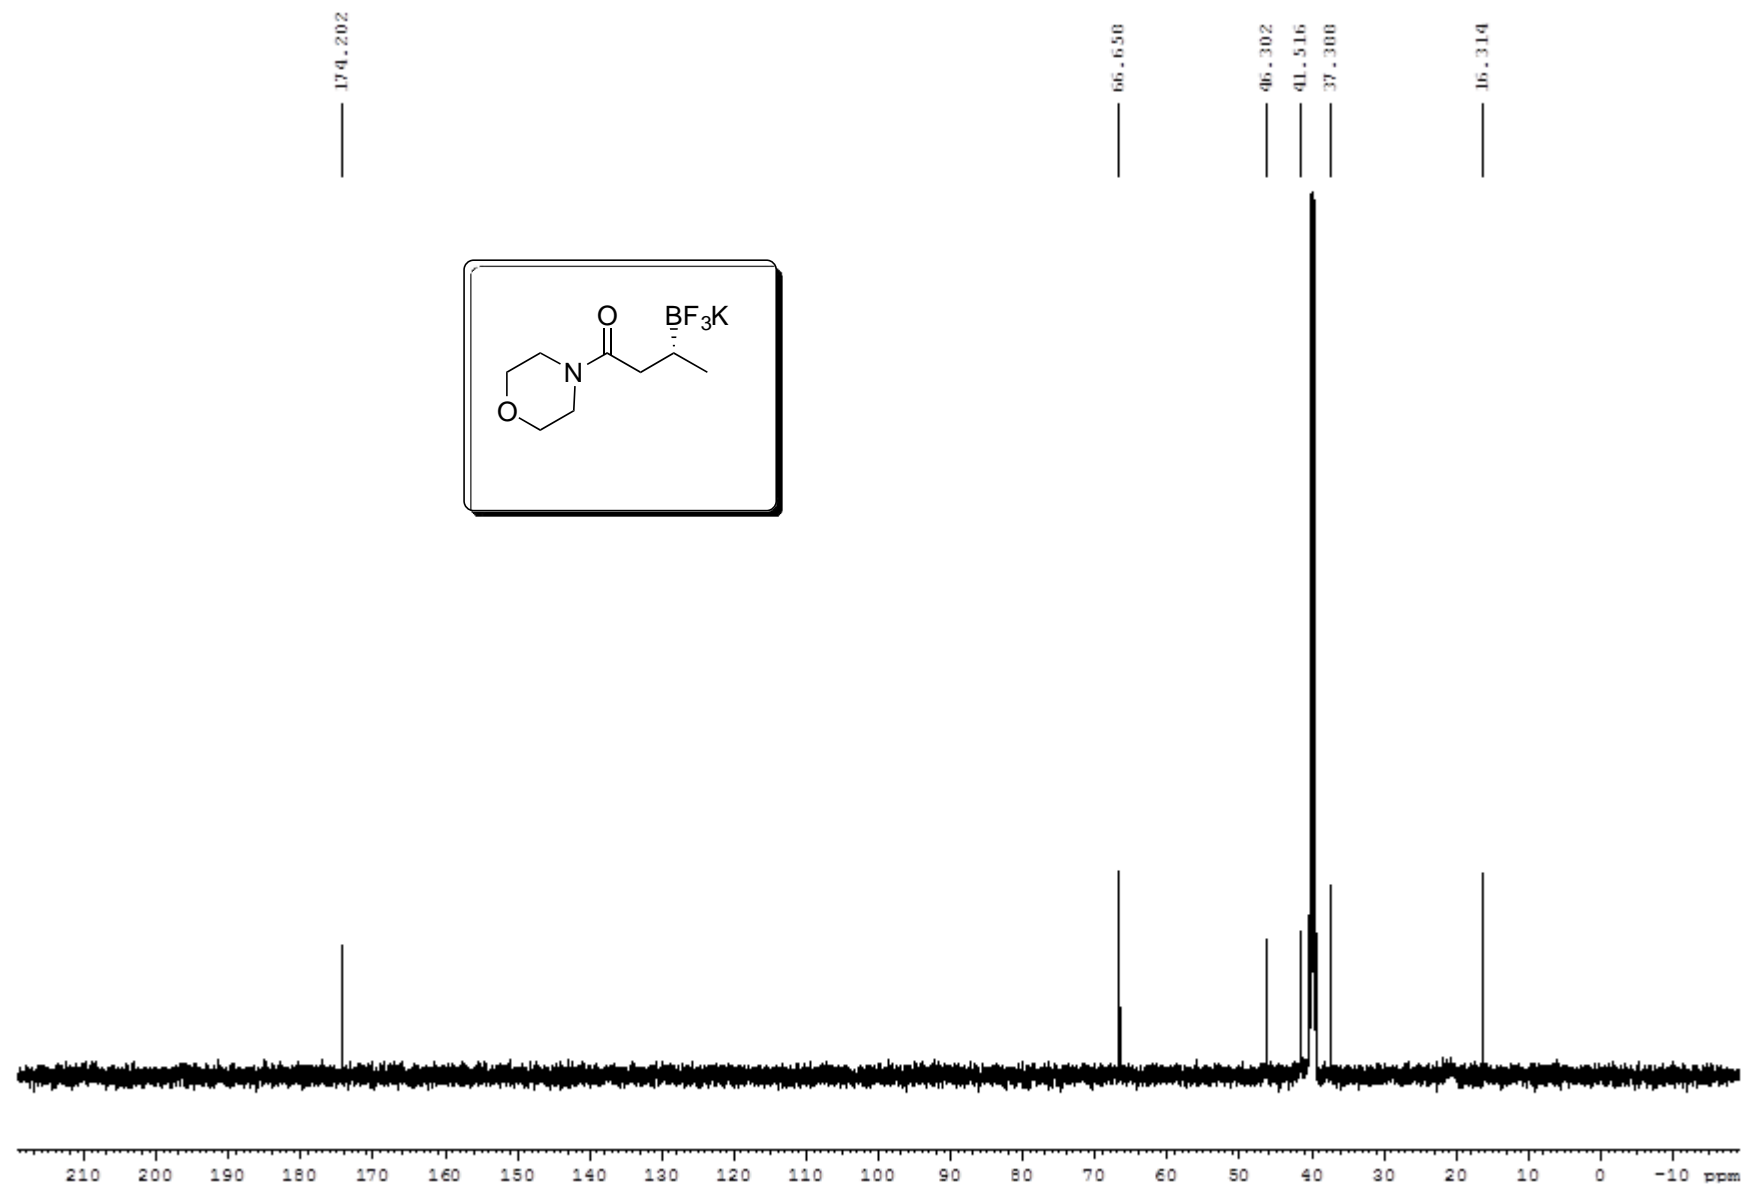



**$^{19}\text{F}$  NMR (DMSO, 470.8 MHz) spectrum of potassium (*R*)- 1-morpholino-3-(trifluoroborato)butan-1-one (2h) from borylation with tetrakis(dimethylamino)diboron**

-145.035

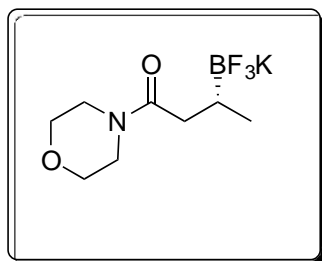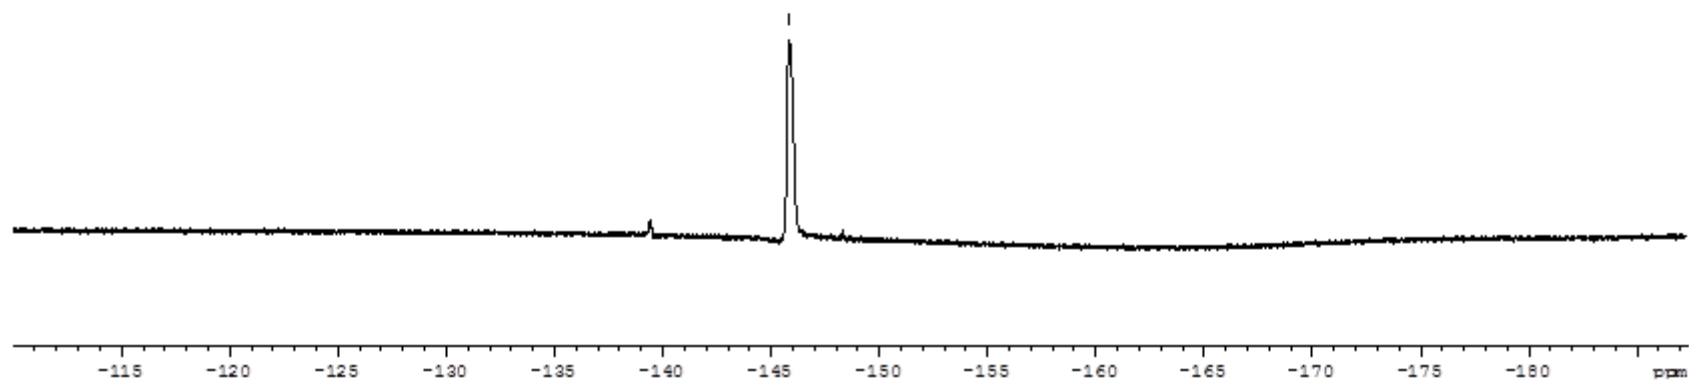

S241

**$^{11}\text{B}$  NMR (Acetone, 128.4 MHz) spectrum of potassium (*R*)- 1-morpholino-3-(trifluoroborato)butan-1-one (2h) from borylation with tetrakis(dimethylamino)diboron**

4.2716

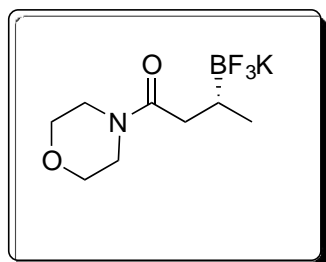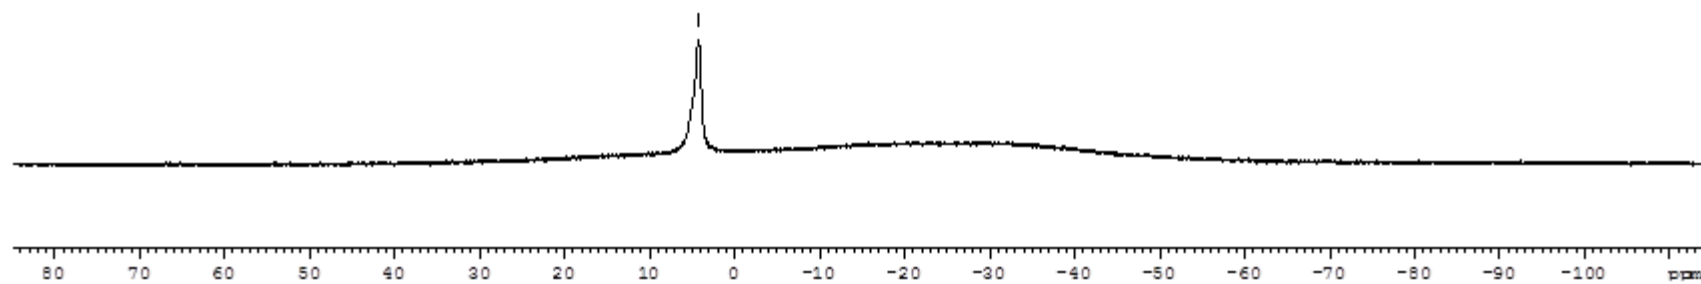

S242

$^1\text{H}$  NMR (DMSO, 500 MHz) spectrum of potassium *N*-ethyl-*N*-(*o*-tolyl)-3-(trifluoroborato)butanamide (2j) from borylation with tetrakis(dimethylamino)diboron

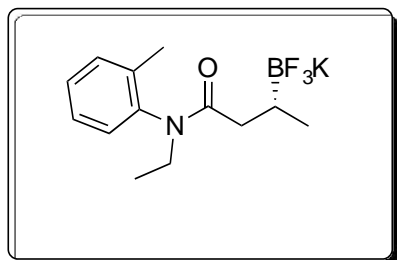

7.333  
7.321  
7.305  
7.252  
7.242  
7.062  
7.047  
7.035

3.909  
3.975  
3.962  
3.940  
3.910  
3.905  
3.092  
3.076  
3.171  
3.161  
3.145  
3.132  
2.999  
2.906  
2.141  
2.114  
1.629  
1.790  
1.779  
1.751  
1.495  
1.474  
1.466  
1.444  
1.325  
1.304  
1.294  
1.272  
0.904  
0.969  
0.532

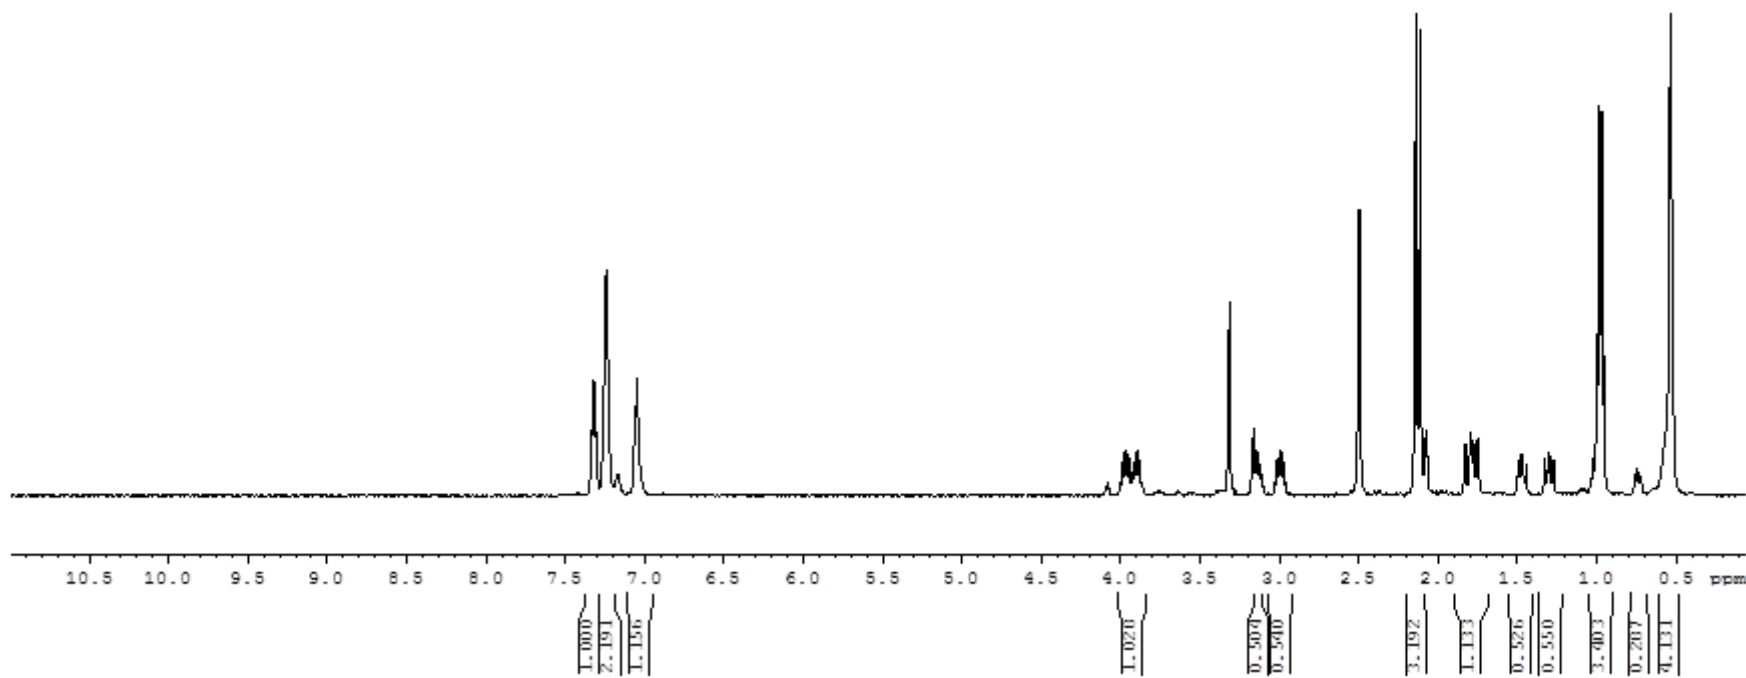

<sup>13</sup>C NMR (DMSO, 125.8 MHz) spectrum of potassium *N*-ethyl-*N*-(*o*-tolyl)-3-(trifluoroborato)butanamide (2j) from borylation with tetrakis(dimethylamino)diboron

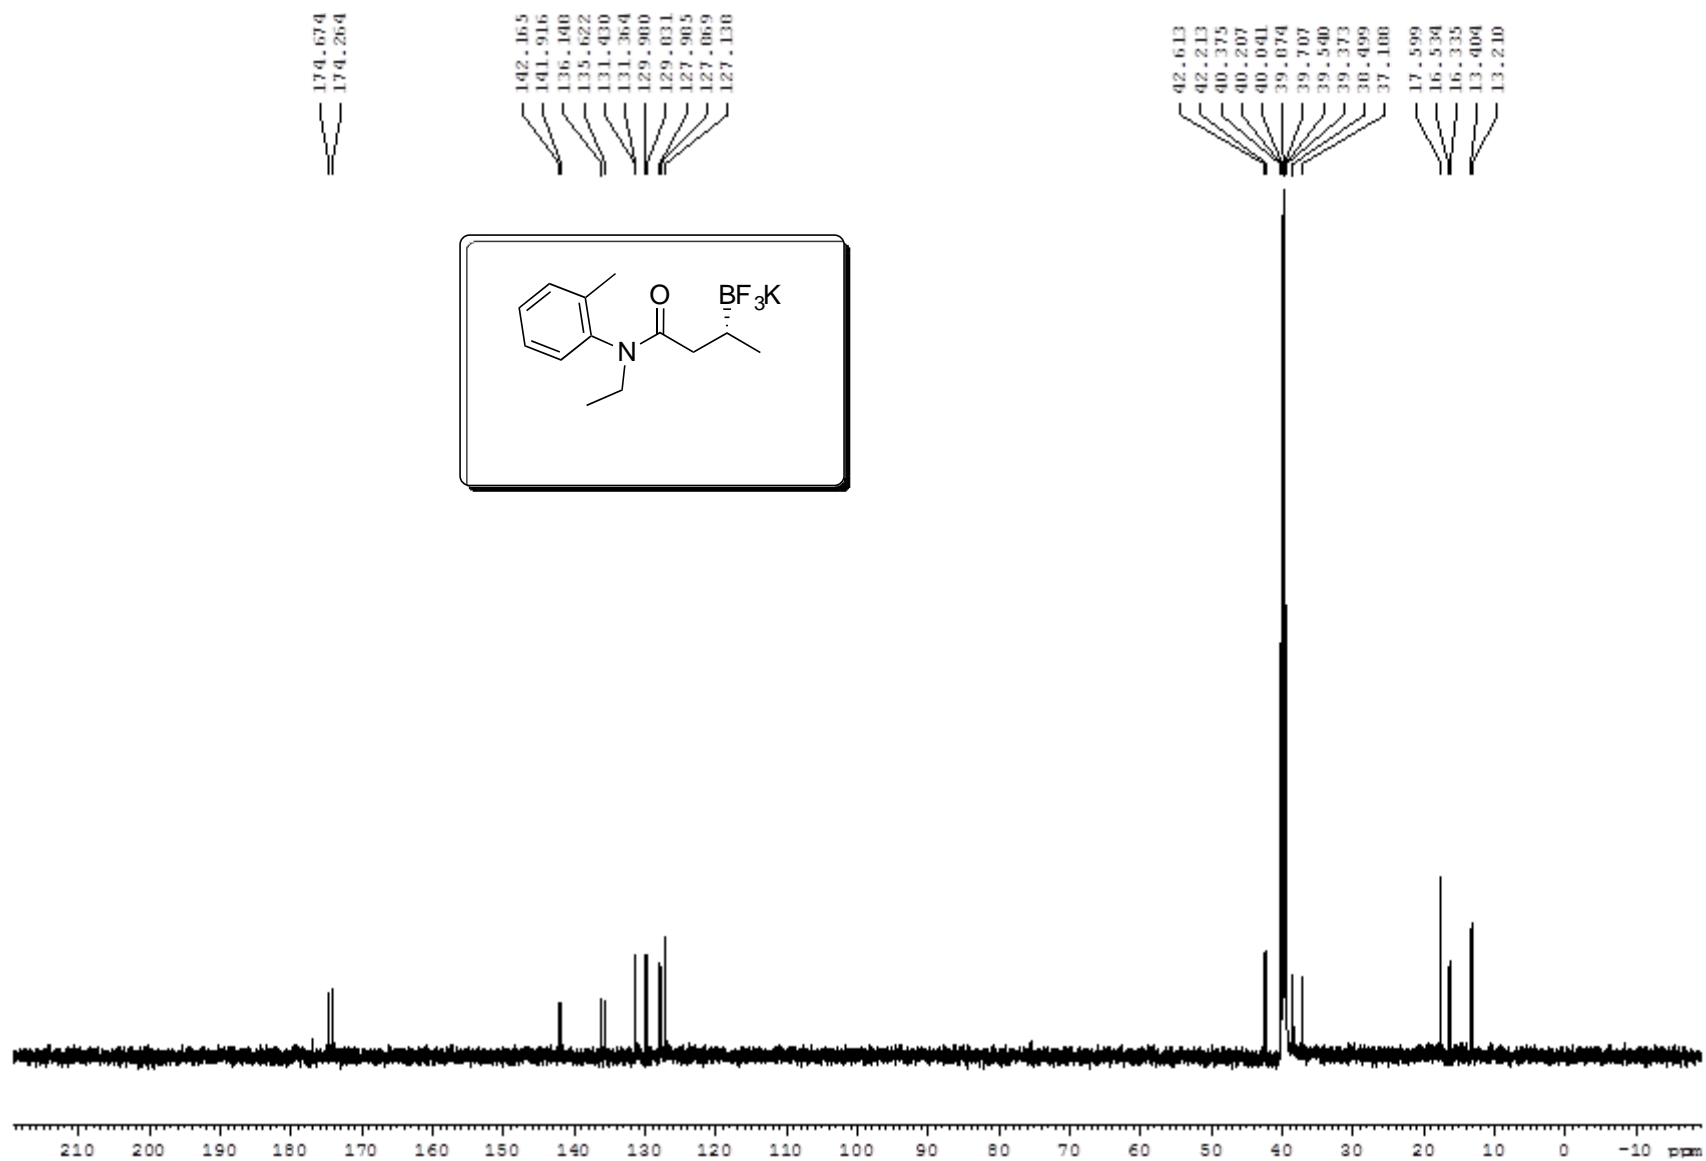

**$^{19}\text{F}$  NMR (DMSO, 470.8 MHz) spectrum of potassium *N*-ethyl-*N*-(*o*-tolyl)-3-(trifluoroborato)butanamide (2j) from borylation with tetrakis(dimethylamino)diboron**

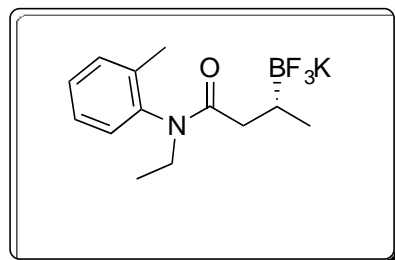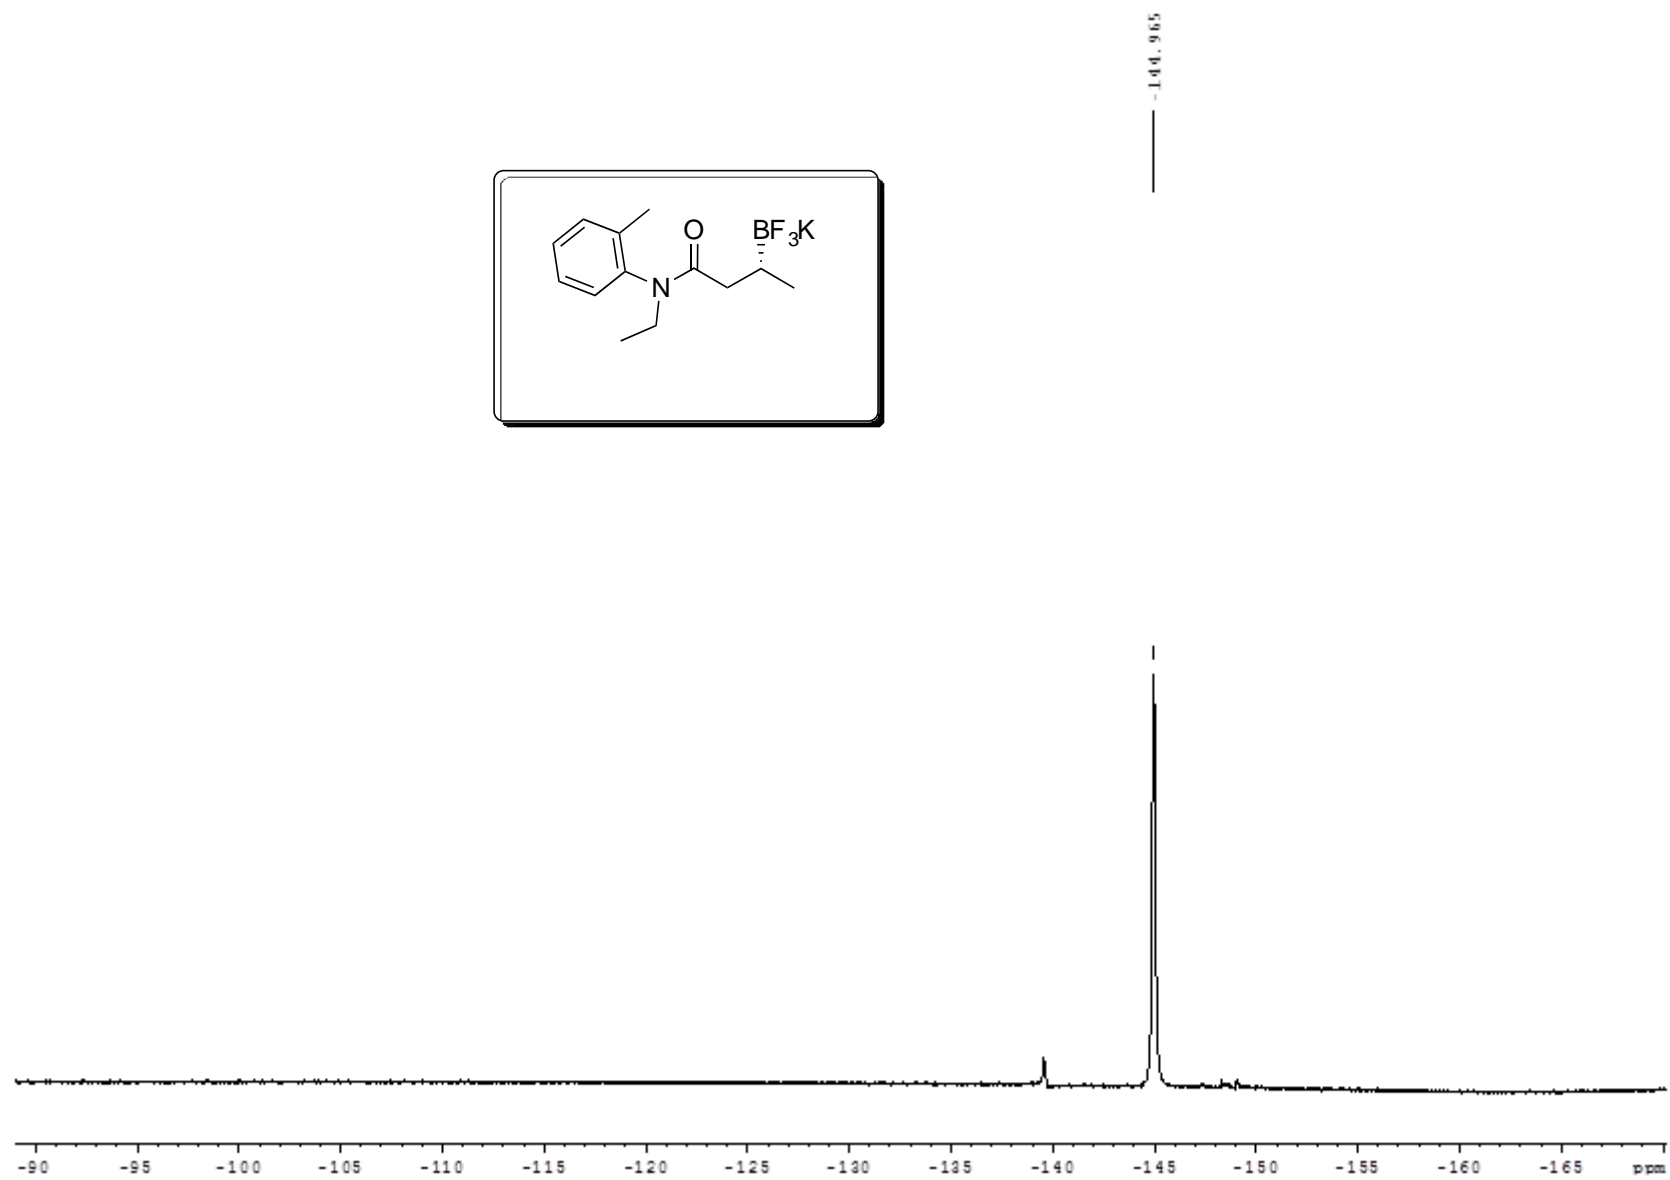

S245

**$^{11}\text{B}$  NMR (DMSO, 128.4 MHz) spectrum of potassium *N*-ethyl-*N*-(*o*-tolyl)-3-(trifluoroborato)butanamide (2j) from borylation with tetrakis(dimethylamino)diboron**

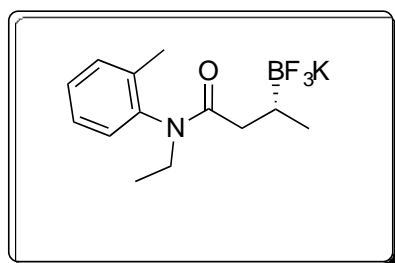

5.242

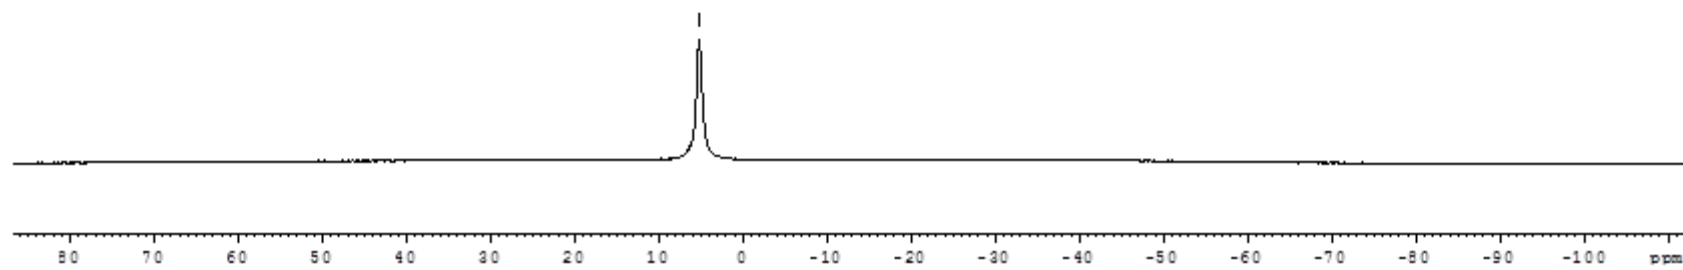

S246

$^1\text{H}$  NMR (Acetone, 500 MHz) spectrum of potassium (*R*)-*N,N*-dimethyl-3-(trifluoroborato)butanamide (2k) from borylation with tetrakis(dimethylamino)diboron

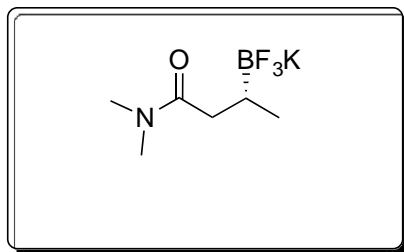

3.203  
2.999  
2.034  
2.200  
2.259  
2.050  
0.793

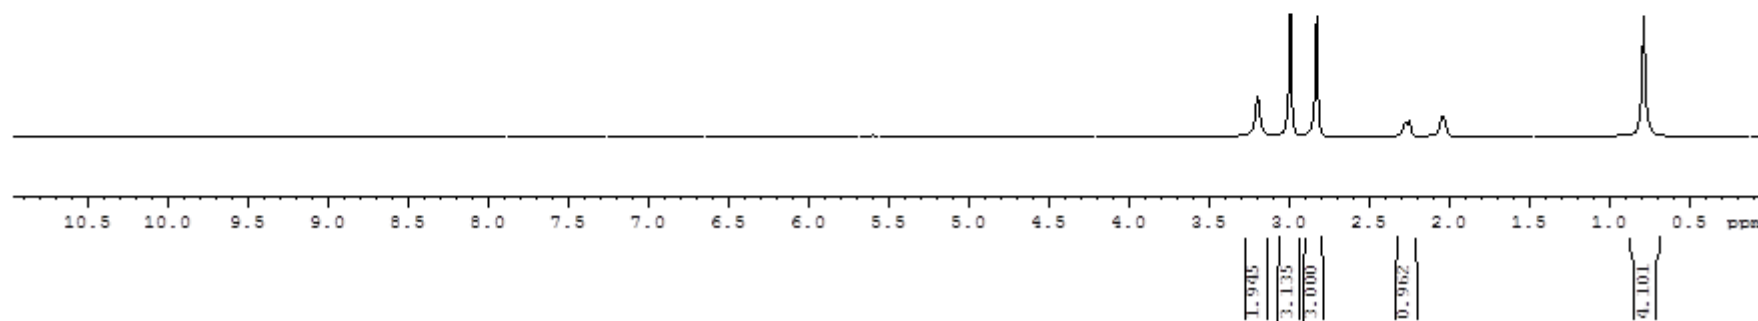

$^{13}\text{C}$  NMR (Acetone, 125.8 MHz) spectrum of potassium (*R*)-*N,N*-dimethyl-3-(trifluoroborato)butanamide (2k) from borylation with tetrakis(dimethylamino)diboron

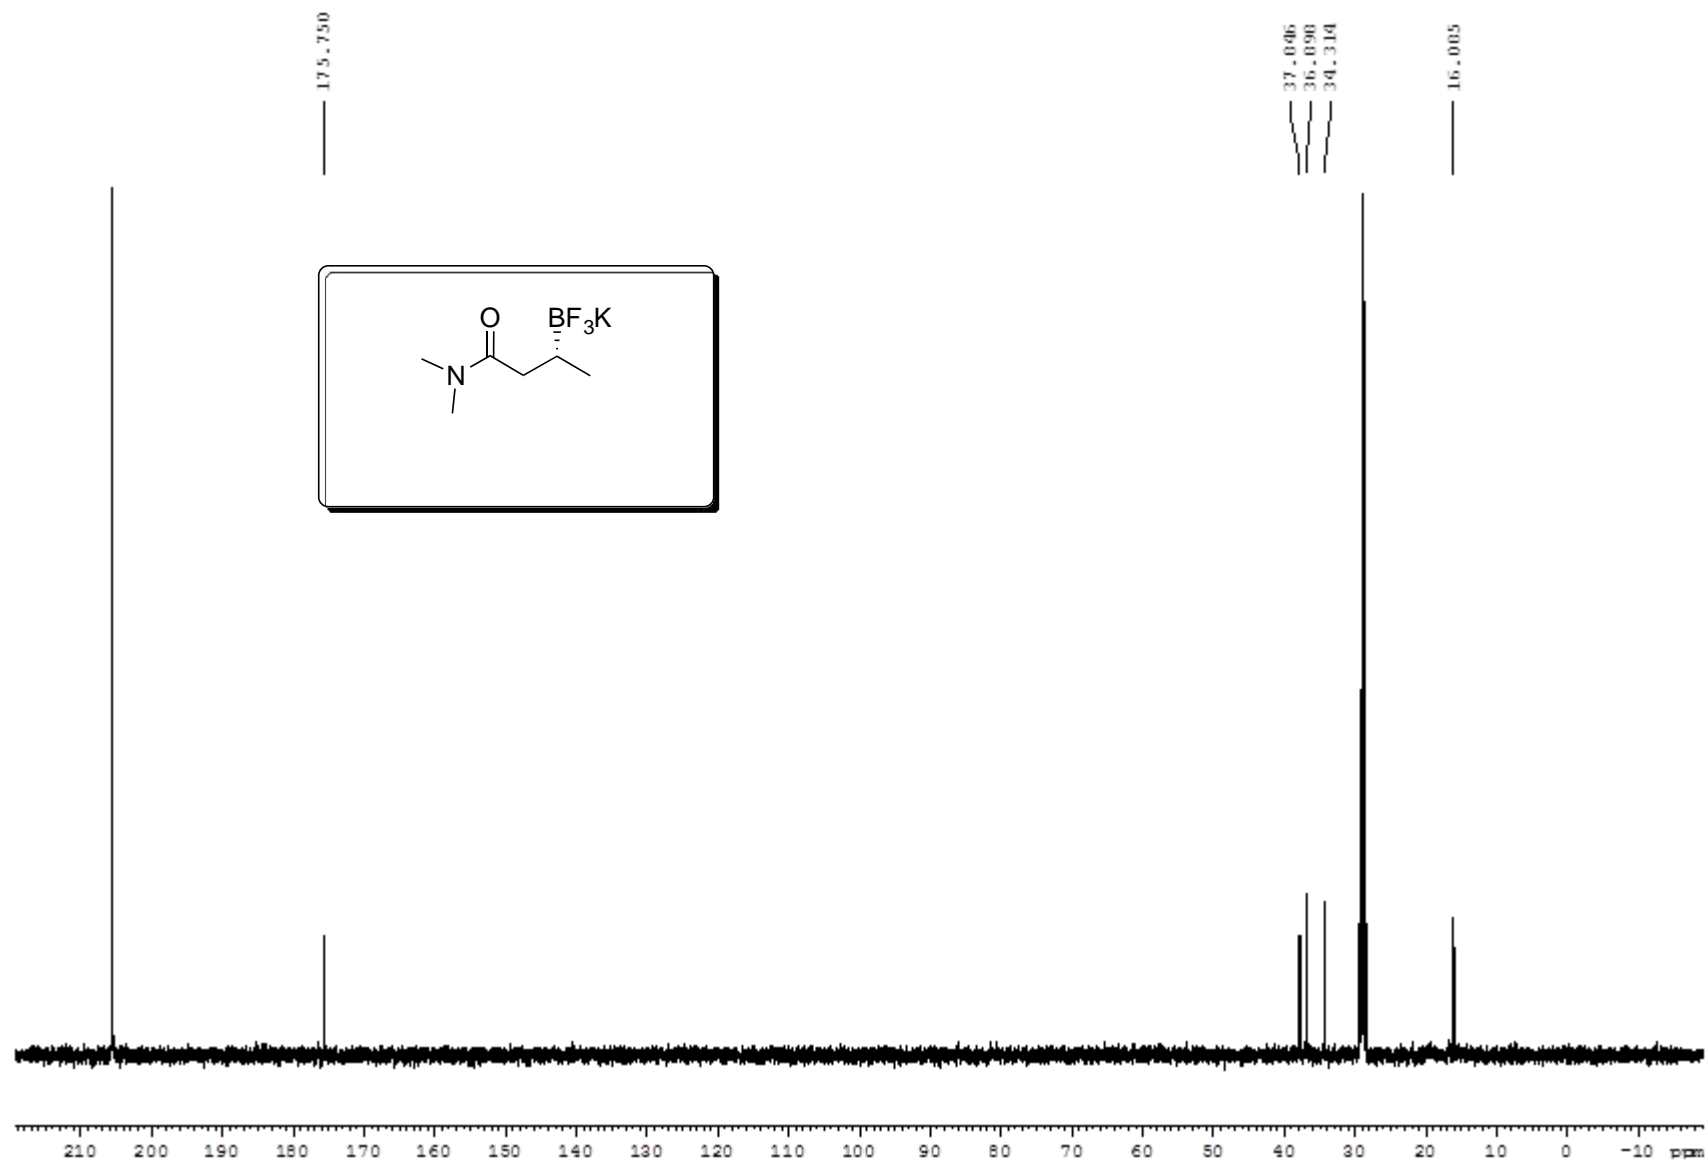



$^{19}\text{F}$  NMR (Acetone, 470.8 MHz) spectrum of Potassium (*R*)-*N,N*-dimethyl-3-(trifluoroborato)butanamide (2k) from borylation with tetrakis(dimethylamino)diboron

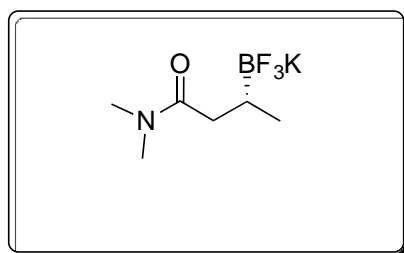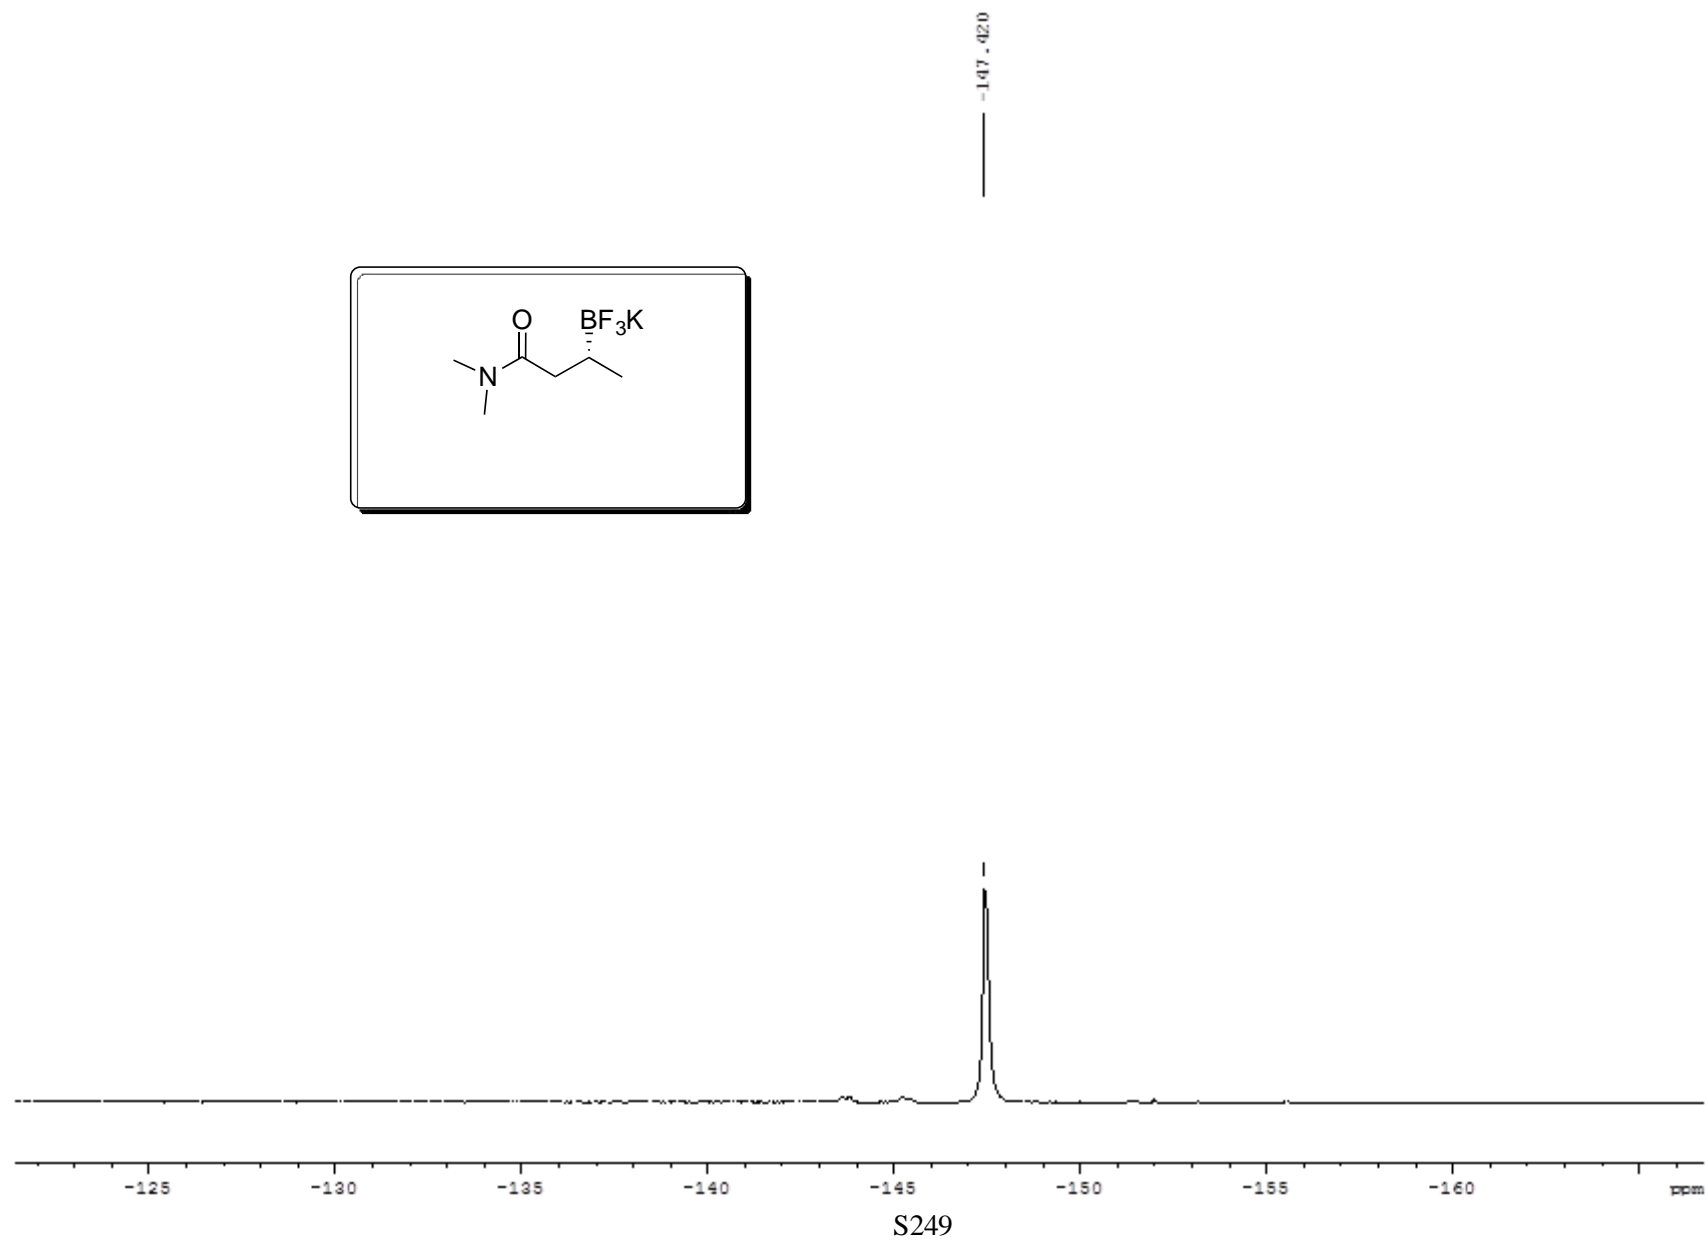

**$^{11}\text{B}$  NMR (Acetone, 128.4 MHz) spectrum of Potassium (*R*)-*N,N*-dimethyl-3-(trifluoroborato)butanamide (2k) from borylation with tetrakis(dimethylamino)diboron**

5.423

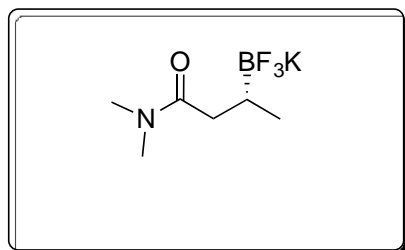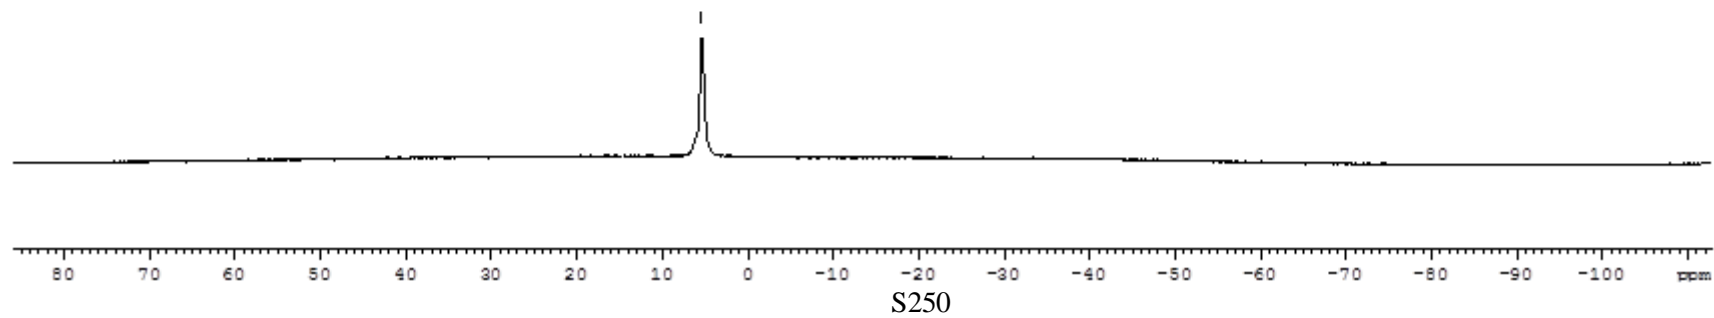

$^1\text{H}$  NMR (DMSO, 500 MHz) spectrum of potassium (*R*)-*N,N*-dibenzyl-3-(trifluoroborato)butanamide (21) from borylation with tetrakis(dimethylamino)diboron

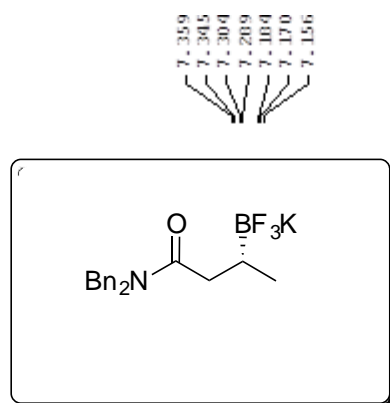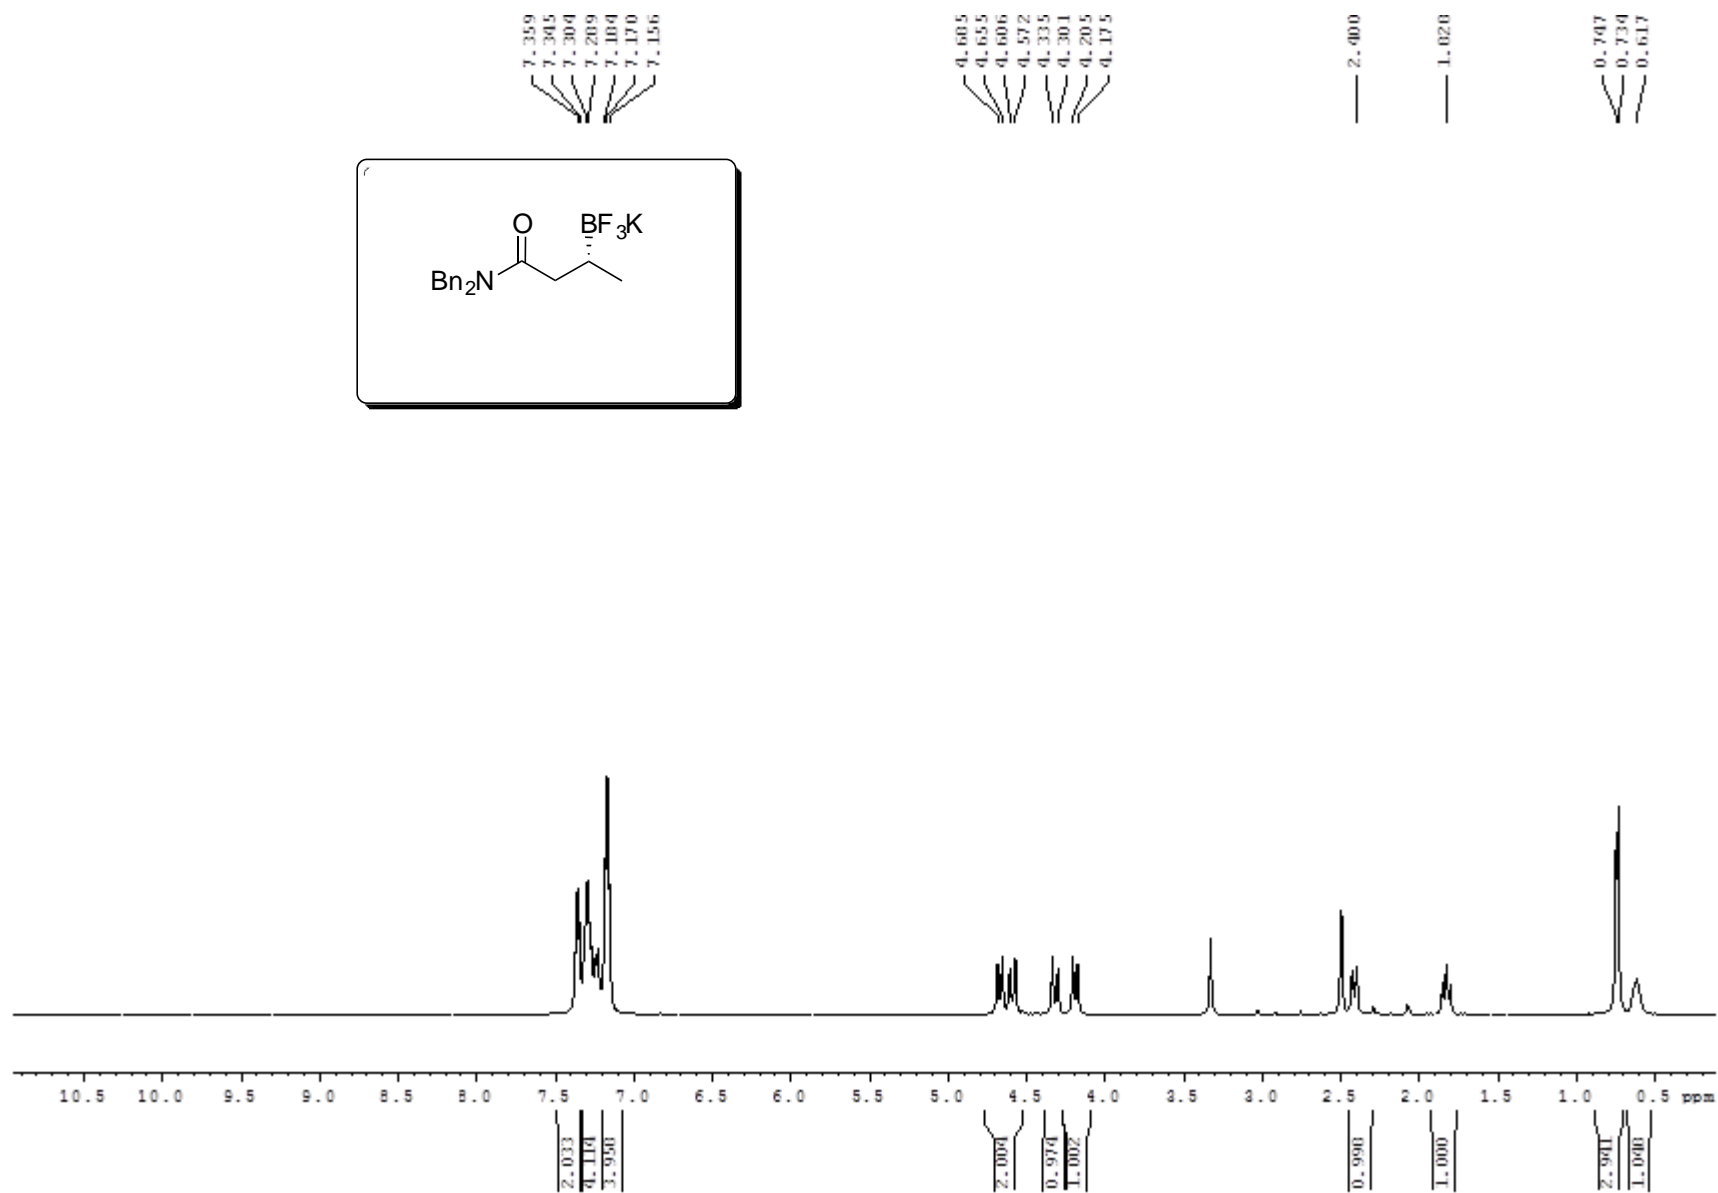

**$^{13}\text{C}$  NMR (DMSO, 125.8 MHz) spectrum of potassium (*R*)-*N,N*-dibenzyl-3-(trifluoroborato)butanamide (2l) from borylation with tetrakis(dimethylamino)diboron**

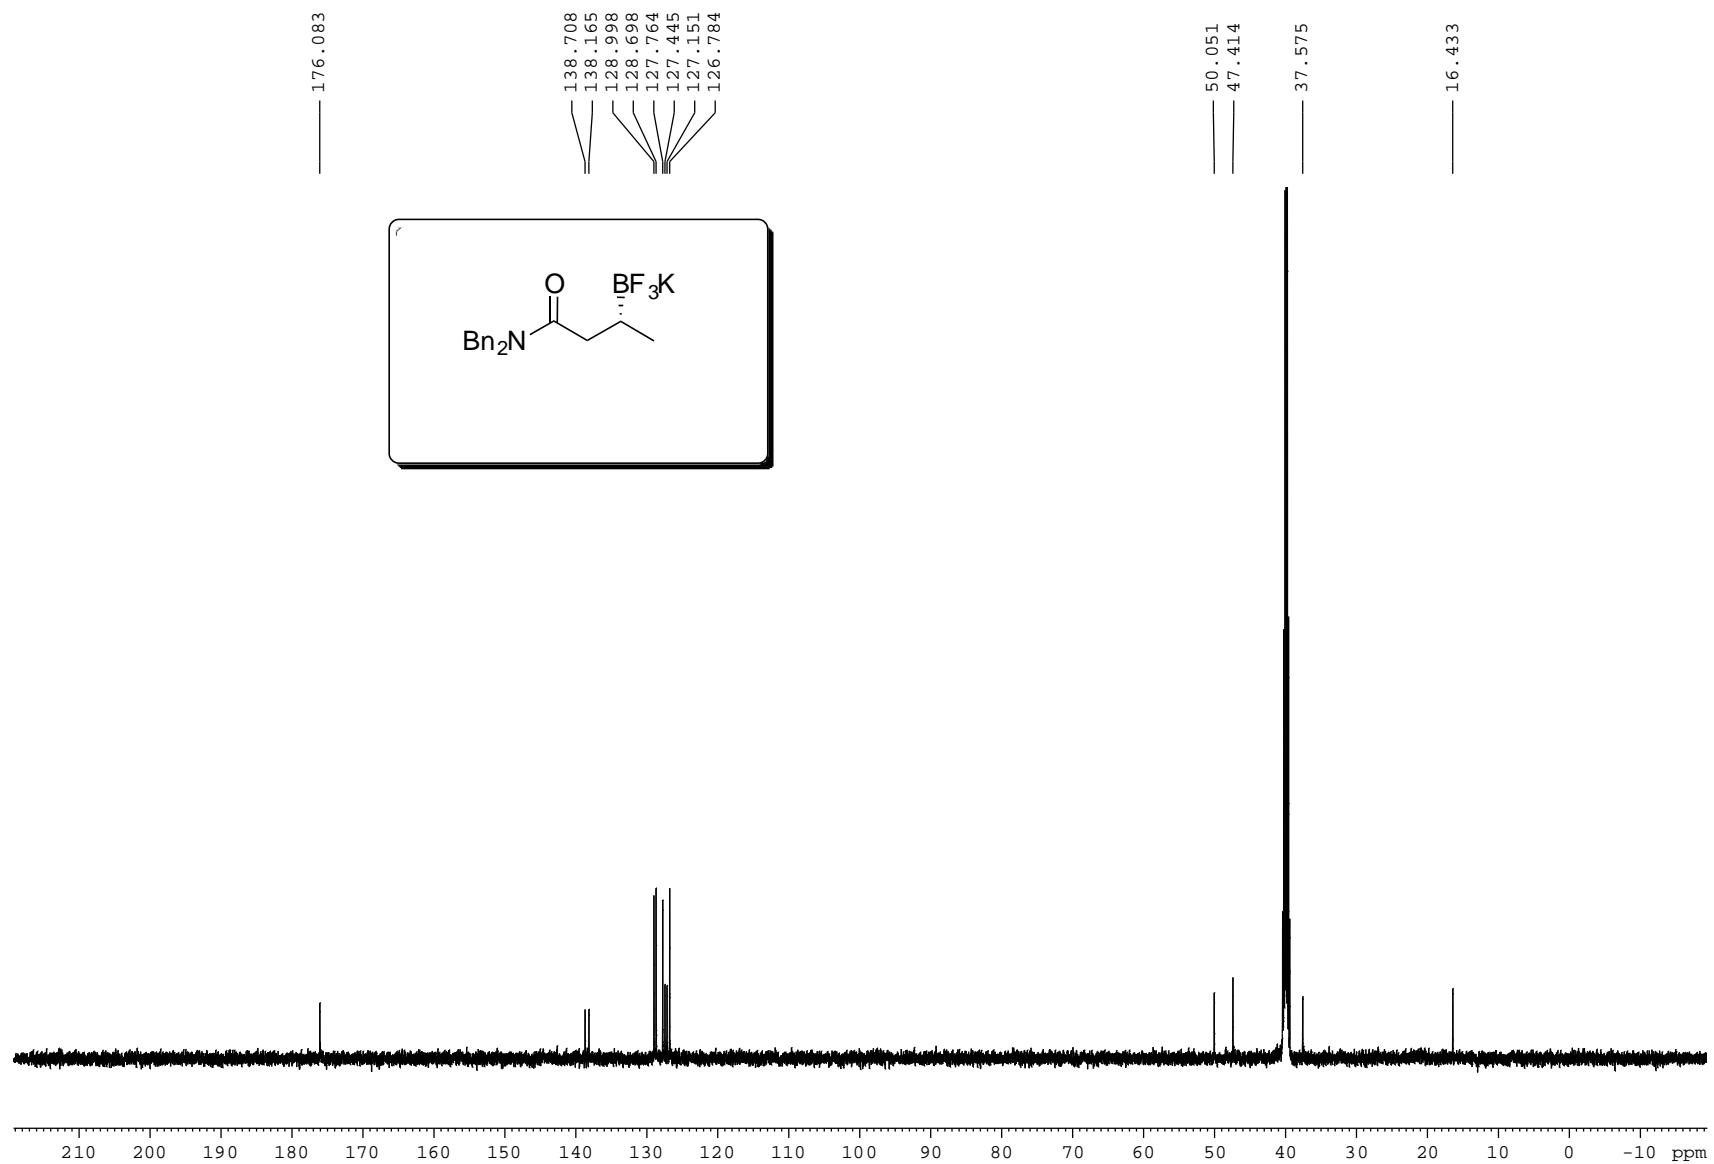

**$^{19}\text{F}$  NMR (Acetone, 470.8 MHz) spectrum of potassium (*R*)-*N,N*-dibenzyl-3-(trifluoroborato)butanamide (2l) from borylation with tetrakis(dimethylamino)diboron**

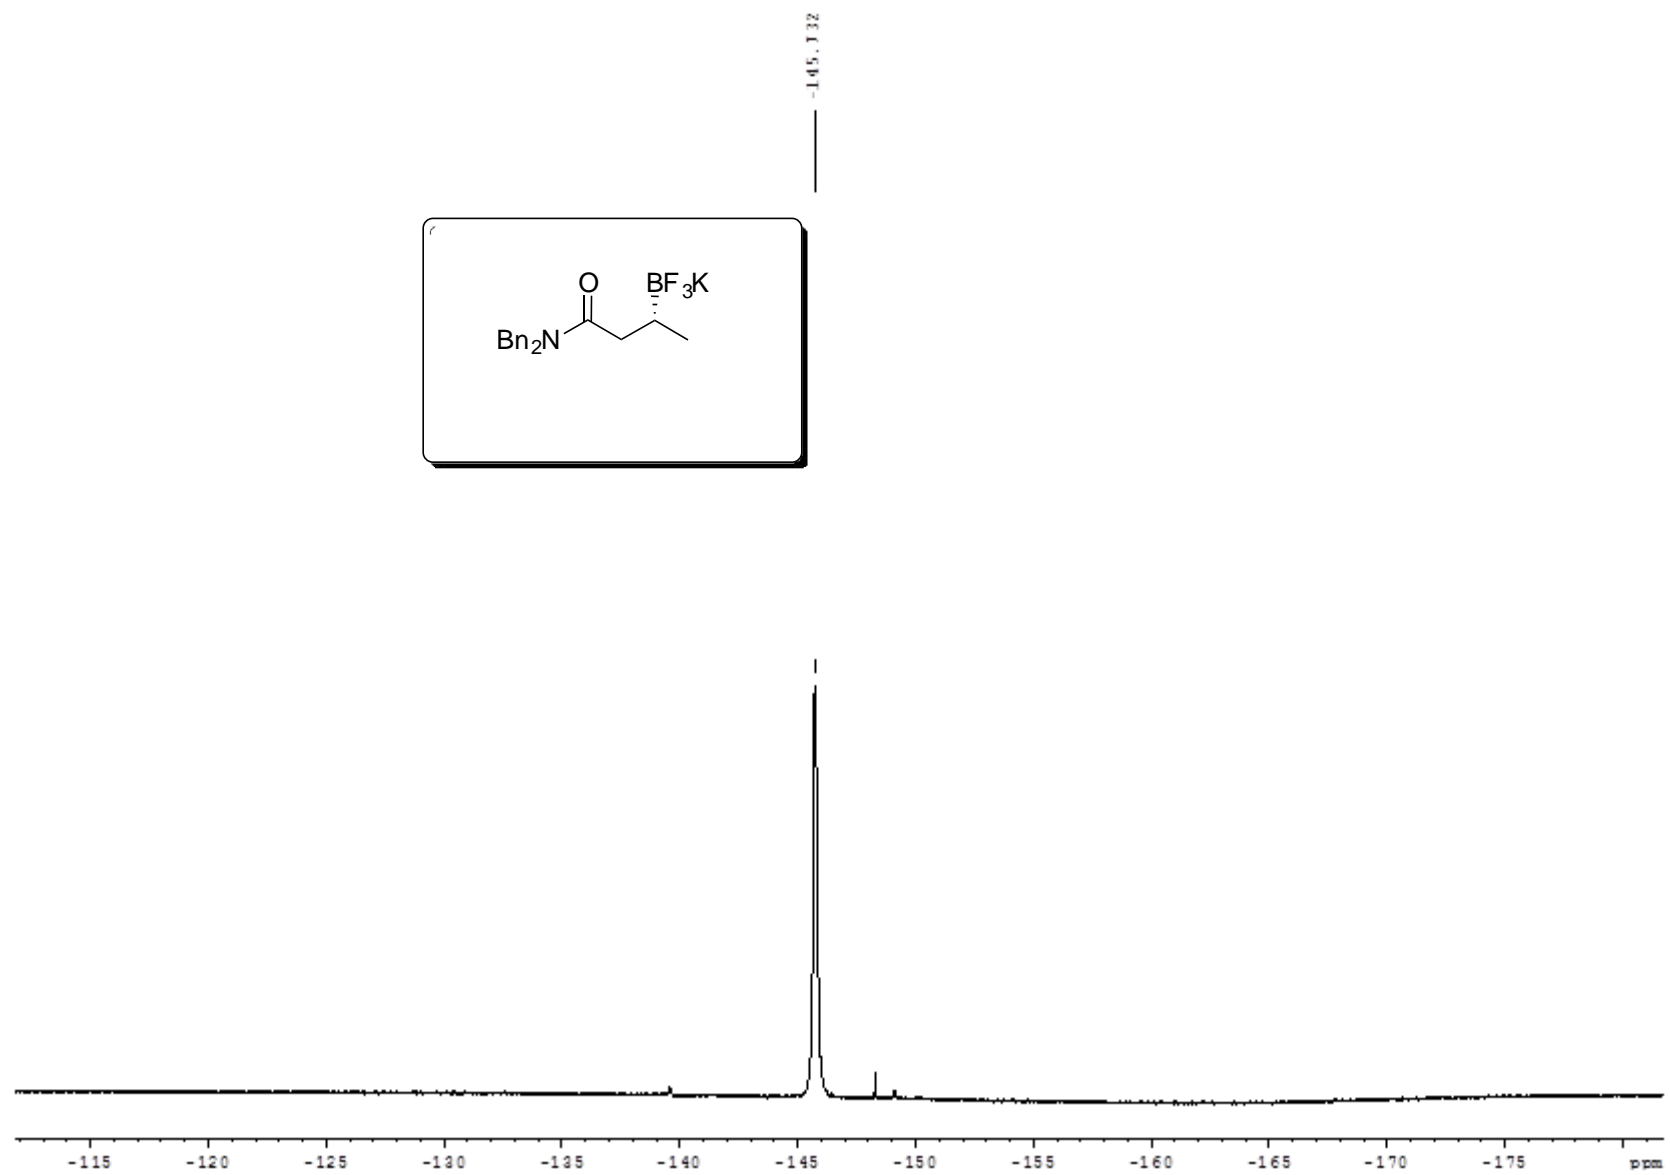

S253

**$^{11}\text{B}$  NMR (Acetone, 128.4 MHz) spectrum of potassium (*R*)-*N,N*-dibenzyl-3-(trifluoroborato)butanamide (2l) from borylation with tetrakis(dimethylamino)diboron**

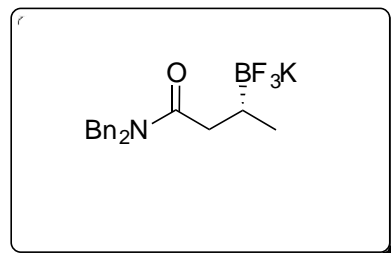

5.465

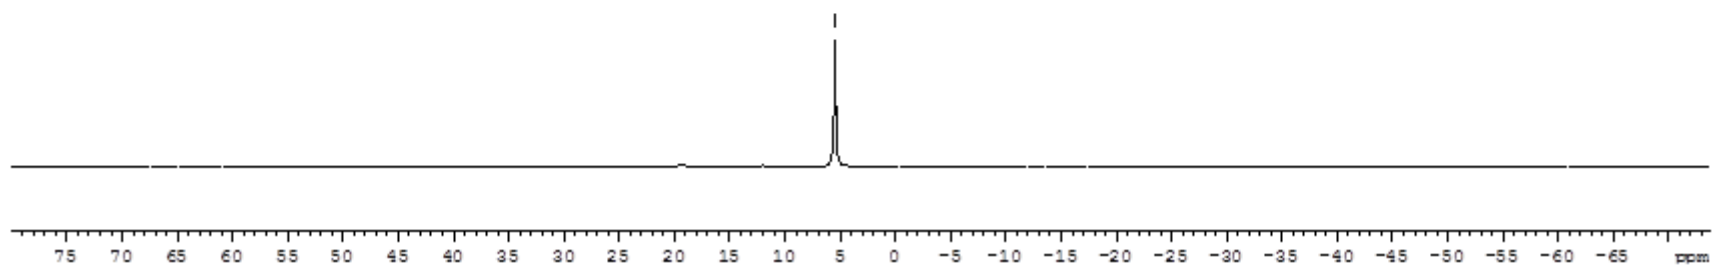

S254

**$^1\text{H}$  NMR (DMSO, 500 MHz) spectrum of potassium (*S*)-*N*-cyclohexyl-3-phenyl-3-(trifluoroborato)propanamide (2m) from borylation with tetrakis(dimethylamino)diboron**

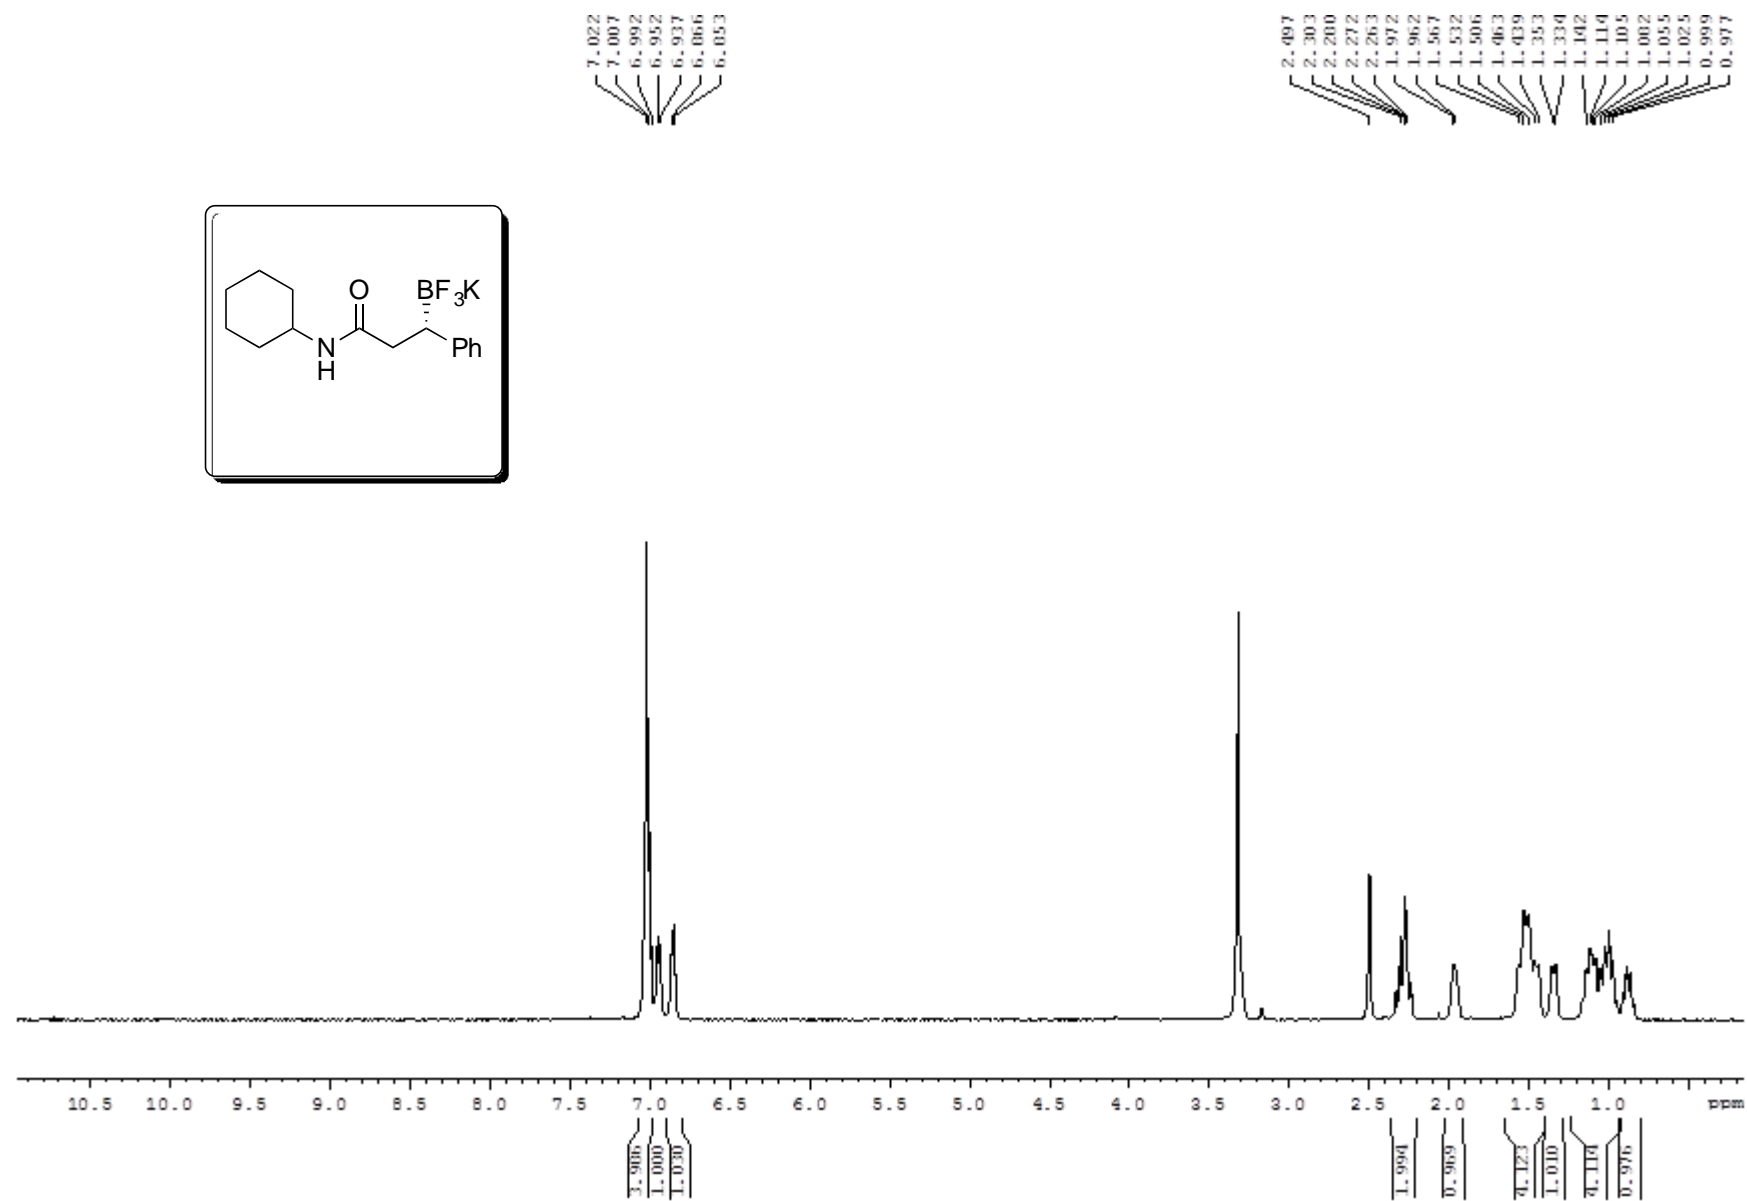

<sup>13</sup>C NMR (DMSO, 125.8 MHz) spectrum of potassium (*S*)-*N*-cyclohexyl-3-phenyl-3-(trifluoroborato)propanamide (2m) from borylation with tetrakis(dimethylamino)diboron

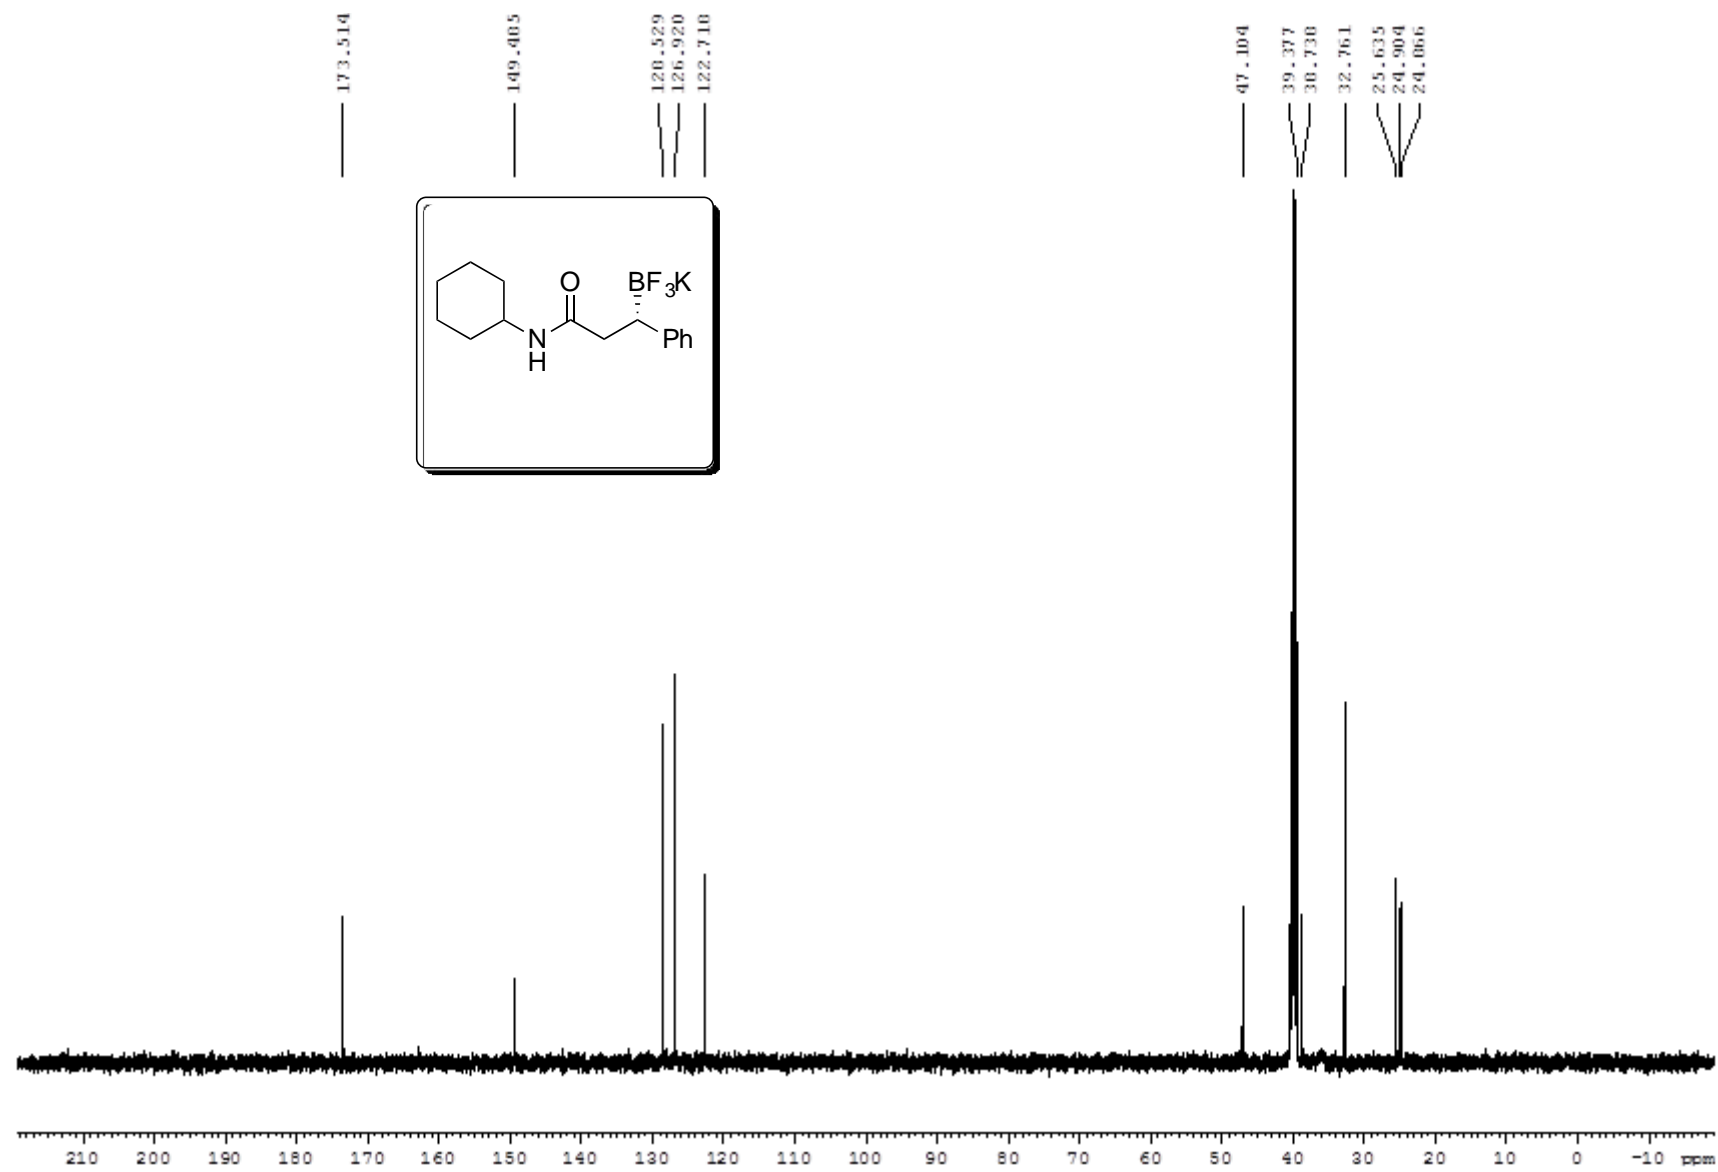



$^{19}\text{F}$  NMR (DMSO, 470.8 MHz) spectrum of potassium (*S*)-*N*-cyclohexyl-3-phenyl-3-(trifluoroborato)propanamide (2m) from borylation with tetrakis(dimethylamino)diboron

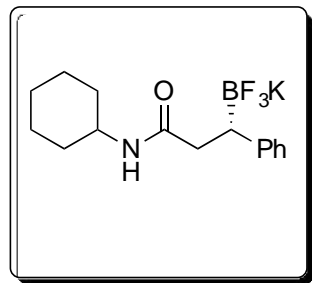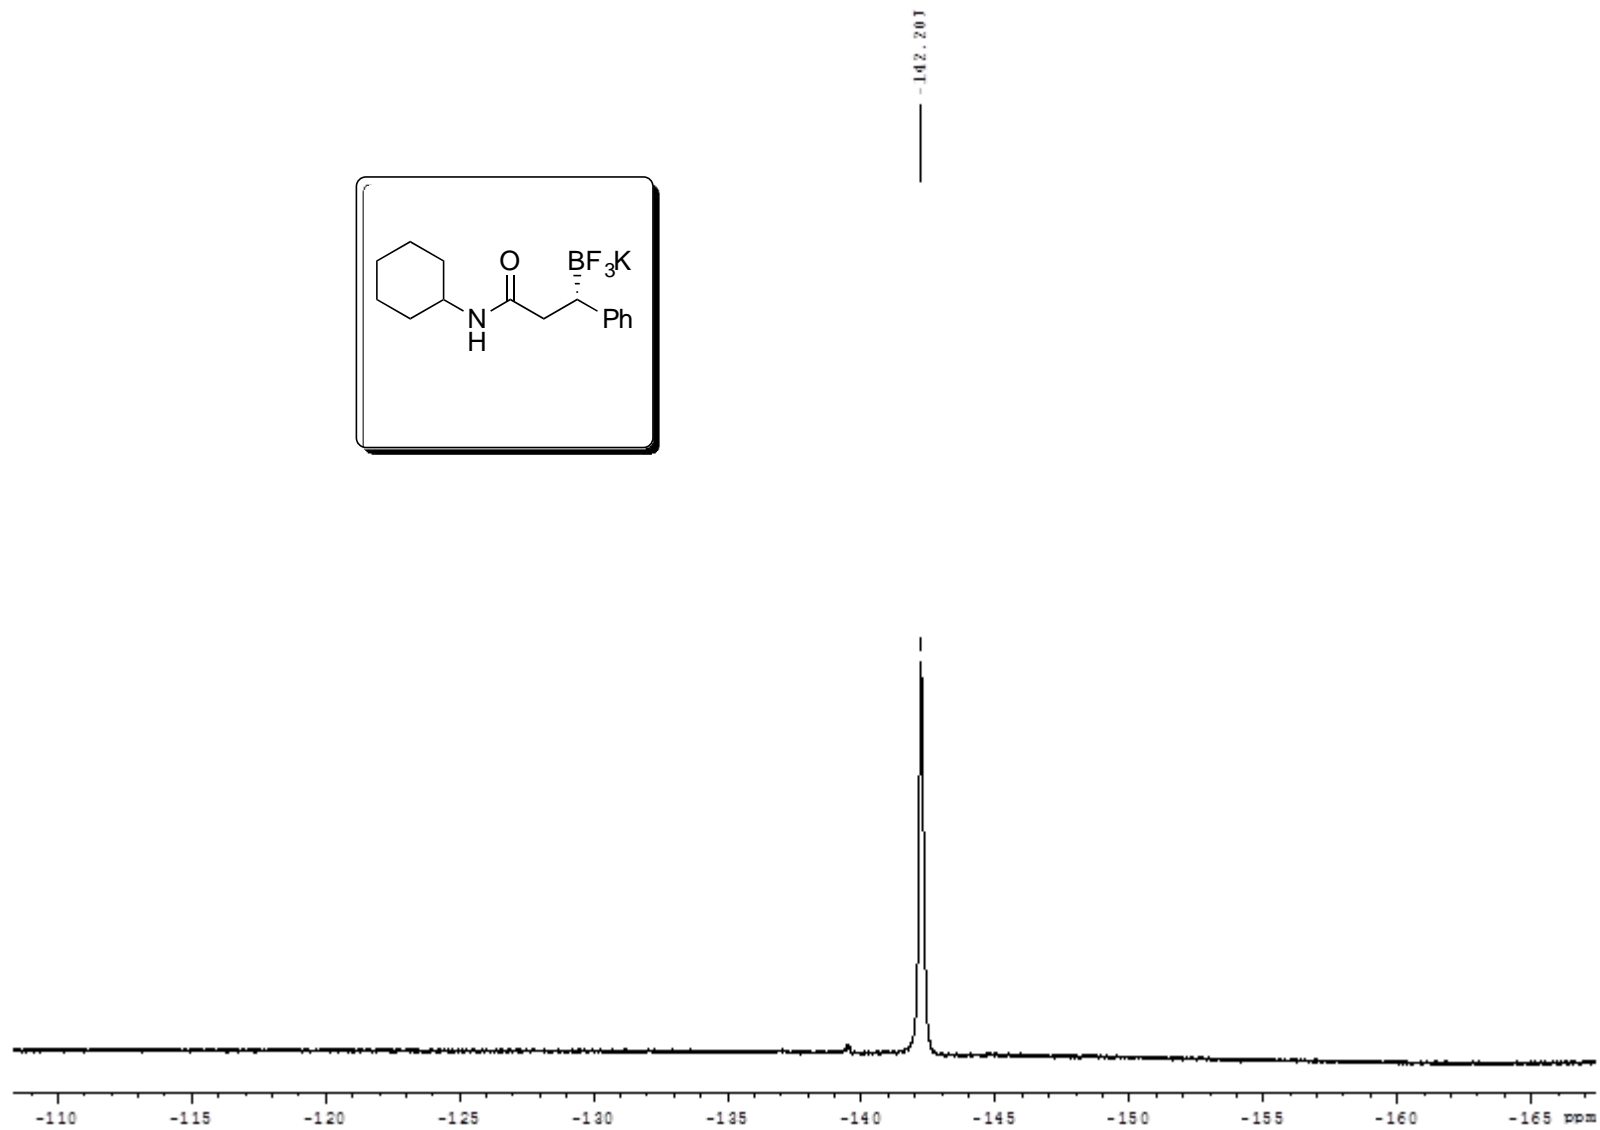

$^{11}\text{B}$  NMR (DMSO, 128.4 MHz) spectrum of potassium (*S*)-*N*-cyclohexyl-3-phenyl-3-(trifluoroborato)propanamide (2m)

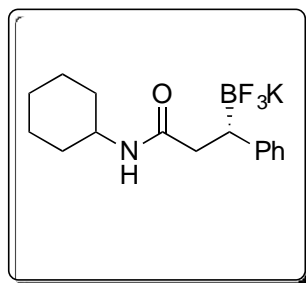

5.220  
5.119

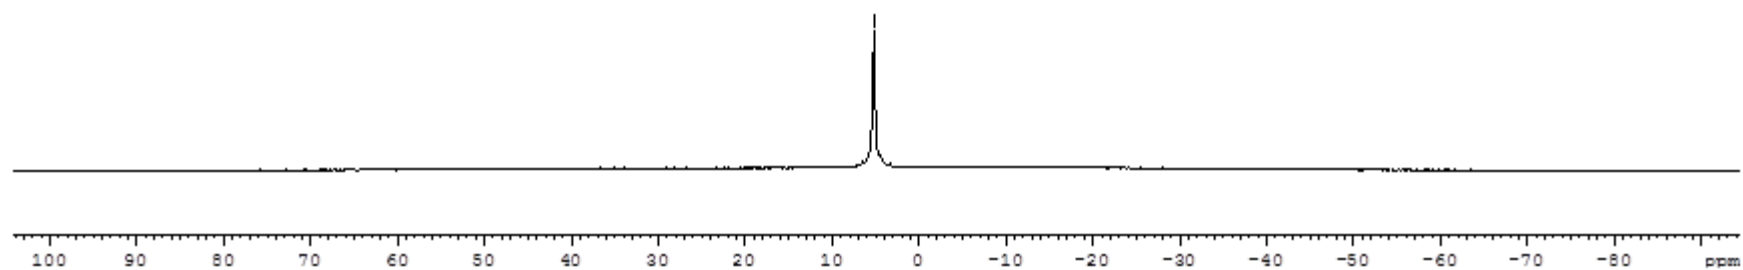

Supplement: NIHMS569059-supplement-Supporting_Information.pdf [file NIHMS569059-supplement-Supporting_Information.pdf]
